# Supplementary material for: Genome-wide identification and co-expression network analysis of Aux/IAA gene family in Salvia miltiorrhiza
Source: PeerJ. 2023 Apr 17;11:e15212. doi: 10.7717/peerj.15212 (PMC10117383; doi:10.7717/peerj.15212)
Supplement: Supplemental Information 1 [file peerj-11-15212-s001.xlsx]

## Sheet: Sheet1
Name	Gene ID	Motifs Found	Motifs Seq	Motifs Pos	Strand	Description
SmIAA1	EVM0000296.1	TC-rich repeats	GTTTTCTTAC	1846	-	cis-acting element involved in defense and stress responsiveness
SmIAA1	EVM0000296.1	CGTCA-motif	CGTCA	657	-	cis-acting regulatory element involved in the MeJA-responsiveness
SmIAA1	EVM0000296.1	CGTCA-motif	CGTCA	1685	+	cis-acting regulatory element involved in the MeJA-responsiveness
SmIAA1	EVM0000296.1	CGTCA-motif	CGTCA	1706	+	cis-acting regulatory element involved in the MeJA-responsiveness
SmIAA1	EVM0000296.1	TGACG-motif	TGACG	657	+	cis-acting regulatory element involved in the MeJA-responsiveness
SmIAA1	EVM0000296.1	TGACG-motif	TGACG	1685	-	cis-acting regulatory element involved in the MeJA-responsiveness
SmIAA1	EVM0000296.1	TGACG-motif	TGACG	1706	-	cis-acting regulatory element involved in the MeJA-responsiveness
SmIAA1	EVM0000296.1	TATC-box	TATCCCA	1295	-	cis-acting element involved in gibberellin-responsiveness
SmIAA1	EVM0000296.1	TATC-box	TATCCCA	1652	+	cis-acting element involved in gibberellin-responsiveness
SmIAA1	EVM0000296.1	ARE	AAACCA	868	-	cis-acting regulatory element essential for the anaerobic induction
SmIAA1	EVM0000296.1	circadian	CAAAGATATC	97	+	cis-acting regulatory element involved in circadian control
SmIAA1	EVM0000296.1	G-box	TAACACGTAG	1824	+	cis-acting regulatory element involved in light responsiveness
SmIAA1	EVM0000296.1	ACE	CTAACGTATT	1585	+	cis-acting element involved in light responsiveness
SmIAA7	EVM0001033.1	GCN4_motif	TGAGTCA	1516	-	cis-regulatory element involved in endosperm expression
SmIAA7	EVM0001033.1	CAT-box	GCCACT	1787	+	cis-acting regulatory element related to meristem expression
SmIAA7	EVM0001033.1	TC-rich repeats	GTTTTCTTAC	237	-	cis-acting element involved in defense and stress responsiveness
SmIAA7	EVM0001033.1	TC-rich repeats	ATTCTCTAAC	707	+	cis-acting element involved in defense and stress responsiveness
SmIAA7	EVM0001033.1	G-Box	CACGTT	1971	-	cis-acting regulatory element involved in light responsiveness
SmIAA7	EVM0001033.1	TCA-element	CCATCTTTTT	1169	-	cis-acting element involved in salicylic acid responsiveness
SmIAA7	EVM0001033.1	ABRE	ACGTG	1972	+	cis-acting element involved in the abscisic acid responsiveness
SmIAA7	EVM0001033.1	ARE	AAACCA	781	+	cis-acting regulatory element essential for the anaerobic induction
SmIAA7	EVM0001033.1	ARE	AAACCA	1149	-	cis-acting regulatory element essential for the anaerobic induction
SmIAA9	EVM0002334.1	ARE	AAACCA	1899	-	cis-acting regulatory element essential for the anaerobic induction
SmIAA9	EVM0002334.1	TC-rich repeats	ATTCTCTAAC	1079	+	cis-acting element involved in defense and stress responsiveness
SmIAA9	EVM0002334.1	LTR	CCGAAA	1691	+	cis-acting element involved in low-temperature responsiveness
SmIAA9	EVM0002334.1	circadian	CAAAGATATC	1059	-	cis-acting regulatory element involved in circadian control
SmIAA14	EVM0003584.1	TC-rich repeats	GTTTTCTTAC	835	+	cis-acting element involved in defense and stress responsiveness
SmIAA14	EVM0003584.1	CGTCA-motif	CGTCA	1861	-	cis-acting regulatory element involved in the MeJA-responsiveness
SmIAA14	EVM0003584.1	TGACG-motif	TGACG	1861	+	cis-acting regulatory element involved in the MeJA-responsiveness
SmIAA14	EVM0003584.1	LTR	CCGAAA	829	-	cis-acting element involved in low-temperature responsiveness
SmIAA14	EVM0003584.1	CAT-box	GCCACT	429	+	cis-acting regulatory element related to meristem expression
SmIAA21	EVM0004282.1	SARE	TTCGACCATCTT	1310	-	cis-acting element involved in salicylic acid responsiveness
SmIAA21	EVM0004282.1	ACE	GACACGTATG	352	+	cis-acting element involved in light responsiveness
SmIAA21	EVM0004282.1	G-box	TACGTG	1252	+	cis-acting regulatory element involved in light responsiveness
SmIAA21	EVM0004282.1	G-box	TACGTG	1373	-	cis-acting regulatory element involved in light responsiveness
SmIAA21	EVM0004282.1	G-Box	CACGTT	354	+	cis-acting regulatory element involved in light responsiveness
SmIAA21	EVM0004282.1	G-Box	CACGTT	950	-	cis-acting regulatory element involved in light responsiveness
SmIAA21	EVM0004282.1	ARE	AAACCA	360	-	cis-acting regulatory element essential for the anaerobic induction
SmIAA21	EVM0004282.1	ABRE	ACGTG	354	-	cis-acting element involved in the abscisic acid responsiveness
SmIAA21	EVM0004282.1	ABRE	ACGTG	951	+	cis-acting element involved in the abscisic acid responsiveness
SmIAA21	EVM0004282.1	ABRE	ACGTG	1253	+	cis-acting element involved in the abscisic acid responsiveness
SmIAA21	EVM0004282.1	ABRE	ACGTG	1373	-	cis-acting element involved in the abscisic acid responsiveness
SmIAA21	EVM0004282.1	TCA-element	CCATCTTTTT	1307	-	cis-acting element involved in salicylic acid responsiveness
SmIAA3	EVM0004349.1	ABRE	GCAACGTGTC	259	-	cis-acting element involved in the abscisic acid responsiveness
SmIAA3	EVM0004349.1	ABRE	ACGTG	261	-	cis-acting element involved in the abscisic acid responsiveness
SmIAA3	EVM0004349.1	ABRE	ACGTG	1768	-	cis-acting element involved in the abscisic acid responsiveness
SmIAA3	EVM0004349.1	G-Box	CACGTT	261	+	cis-acting regulatory element involved in light responsiveness
SmIAA3	EVM0004349.1	LTR	CCGAAA	361	+	cis-acting element involved in low-temperature responsiveness
SmIAA3	EVM0004349.1	LTR	CCGAAA	1383	-	cis-acting element involved in low-temperature responsiveness
SmIAA3	EVM0004349.1	LTR	CCGAAA	1505	+	cis-acting element involved in low-temperature responsiveness
SmIAA3	EVM0004349.1	LTR	CCGAAA	1599	-	cis-acting element involved in low-temperature responsiveness
SmIAA3	EVM0004349.1	G-box	TACGTG	1768	-	cis-acting regulatory element involved in light responsiveness
SmIAA22	EVM0006475.1	LTR	CCGAAA	341	-	cis-acting element involved in low-temperature responsiveness
SmIAA22	EVM0006475.1	LTR	CCGAAA	1973	-	cis-acting element involved in low-temperature responsiveness
SmIAA22	EVM0006475.1	G-Box	CACGTT	1151	+	cis-acting regulatory element involved in light responsiveness
SmIAA22	EVM0006475.1	G-Box	CACGTT	1356	+	cis-acting regulatory element involved in light responsiveness
SmIAA22	EVM0006475.1	CGTCA-motif	CGTCA	402	-	cis-acting regulatory element involved in the MeJA-responsiveness
SmIAA22	EVM0006475.1	CGTCA-motif	CGTCA	1565	+	cis-acting regulatory element involved in the MeJA-responsiveness
SmIAA22	EVM0006475.1	ARE	AAACCA	681	+	cis-acting regulatory element essential for the anaerobic induction
SmIAA22	EVM0006475.1	ARE	AAACCA	1290	+	cis-acting regulatory element essential for the anaerobic induction
SmIAA22	EVM0006475.1	MSA-like	TCCAACGGT	1661	+	cis-acting element involved in cell cycle regulation
SmIAA22	EVM0006475.1	TGACG-motif	TGACG	402	+	cis-acting regulatory element involved in the MeJA-responsiveness
SmIAA22	EVM0006475.1	TGACG-motif	TGACG	1565	-	cis-acting regulatory element involved in the MeJA-responsiveness
SmIAA22	EVM0006475.1	ABRE	ACGTG	1151	-	cis-acting element involved in the abscisic acid responsiveness
SmIAA22	EVM0006475.1	ABRE	GCAACGTGTC	1354	-	cis-acting element involved in the abscisic acid responsiveness
SmIAA22	EVM0006475.1	ABRE	ACGTG	1356	-	cis-acting element involved in the abscisic acid responsiveness
SmIAA16	EVM0009041.1	circadian	CAAAGATATC	656	+	cis-acting regulatory element involved in circadian control
SmIAA16	EVM0009041.1	SARE	TTCGACCATCTT	218	-	cis-acting element involved in salicylic acid responsiveness
SmIAA16	EVM0009041.1	G-box	CACGAC	75	+	cis-acting regulatory element involved in light responsiveness
SmIAA16	EVM0009041.1	G-box	CACGAC	1178	+	cis-acting regulatory element involved in light responsiveness
SmIAA16	EVM0009041.1	G-box	GCCACGTGGA	1806	-	cis-acting regulatory element involved in light responsiveness
SmIAA16	EVM0009041.1	G-box	CACGTG	1808	-	cis-acting regulatory element involved in light responsiveness
SmIAA16	EVM0009041.1	G-Box	CACGTG	1808	-	cis-acting regulatory element involved in light responsiveness
SmIAA16	EVM0009041.1	CGTCA-motif	CGTCA	186	+	cis-acting regulatory element involved in the MeJA-responsiveness
SmIAA16	EVM0009041.1	TCA-element	CCATCTTTTT	333	+	cis-acting element involved in salicylic acid responsiveness
SmIAA16	EVM0009041.1	TGACG-motif	TGACG	186	-	cis-acting regulatory element involved in the MeJA-responsiveness
SmIAA16	EVM0009041.1	ABRE	GACACGTGGC	1806	-	cis-acting element involved in the abscisic acid responsiveness
SmIAA16	EVM0009041.1	ABRE	CACGTG	1808	-	cis-acting element involved in the abscisic acid responsiveness
SmIAA16	EVM0009041.1	ABRE	ACGTG	1809	+	cis-acting element involved in the abscisic acid responsiveness
SmIAA16	EVM0009041.1	TATC-box	TATCCCA	1782	-	cis-acting element involved in gibberellin-responsiveness
SmIAA2	EVM0009395.1	G-box	TACGTG	605	-	cis-acting regulatory element involved in light responsiveness
SmIAA2	EVM0009395.1	G-box	CACGTG	703	+	cis-acting regulatory element involved in light responsiveness
SmIAA2	EVM0009395.1	G-box	TACGTG	734	+	cis-acting regulatory element involved in light responsiveness
SmIAA2	EVM0009395.1	G-Box	CACGTG	703	+	cis-acting regulatory element involved in light responsiveness
SmIAA2	EVM0009395.1	TC-rich repeats	ATTCTCTAAC	909	+	cis-acting element involved in defense and stress responsiveness
SmIAA2	EVM0009395.1	AuxRR-core	GGTCCAT	430	+	cis-acting regulatory element involved in auxin responsiveness
SmIAA2	EVM0009395.1	TCA-element	CCATCTTTTT	194	-	cis-acting element involved in salicylic acid responsiveness
SmIAA2	EVM0009395.1	ABRE	ACGTG	605	-	cis-acting element involved in the abscisic acid responsiveness
SmIAA2	EVM0009395.1	ABRE	CACGTG	703	+	cis-acting element involved in the abscisic acid responsiveness
SmIAA2	EVM0009395.1	ABRE	ACGTG	704	+	cis-acting element involved in the abscisic acid responsiveness
SmIAA2	EVM0009395.1	ABRE	CGTACGTGCA	732	+	cis-acting element involved in the abscisic acid responsiveness
SmIAA2	EVM0009395.1	ABRE	ACGTG	735	+	cis-acting element involved in the abscisic acid responsiveness
SmIAA5	EVM0009745.1	O2-site	GTTGACGTGA	182	-	cis-acting regulatory element involved in zein metabolism regulation
SmIAA5	EVM0009745.1	circadian	CAAAGATATC	947	-	cis-acting regulatory element involved in circadian control
SmIAA5	EVM0009745.1	CAT-box	GCCACT	1702	-	cis-acting regulatory element related to meristem expression
SmIAA5	EVM0009745.1	G-box	CCACGTAA	674	+	cis-acting regulatory element involved in light responsiveness
SmIAA5	EVM0009745.1	G-box	TACGTG	675	-	cis-acting regulatory element involved in light responsiveness
SmIAA5	EVM0009745.1	G-box	CACGAC	1171	+	cis-acting regulatory element involved in light responsiveness
SmIAA5	EVM0009745.1	G-box	CACGTC	1246	+	cis-acting regulatory element involved in light responsiveness
SmIAA5	EVM0009745.1	G-box	TACGTG	1252	-	cis-acting regulatory element involved in light responsiveness
SmIAA5	EVM0009745.1	LTR	CCGAAA	1122	-	cis-acting element involved in low-temperature responsiveness
SmIAA5	EVM0009745.1	LTR	CCGAAA	1353	-	cis-acting element involved in low-temperature responsiveness
SmIAA5	EVM0009745.1	LTR	CCGAAA	1934	+	cis-acting element involved in low-temperature responsiveness
SmIAA5	EVM0009745.1	G-Box	CACGTT	784	-	cis-acting regulatory element involved in light responsiveness
SmIAA5	EVM0009745.1	CGTCA-motif	CGTCA	1765	+	cis-acting regulatory element involved in the MeJA-responsiveness
SmIAA5	EVM0009745.1	ARE	AAACCA	1743	-	cis-acting regulatory element essential for the anaerobic induction
SmIAA5	EVM0009745.1	ABRE	ACGTG	675	-	cis-acting element involved in the abscisic acid responsiveness
SmIAA5	EVM0009745.1	ABRE	ACGTG	785	+	cis-acting element involved in the abscisic acid responsiveness
SmIAA5	EVM0009745.1	ABRE	ACGTG	1246	-	cis-acting element involved in the abscisic acid responsiveness
SmIAA5	EVM0009745.1	ABRE	ACGTG	1252	-	cis-acting element involved in the abscisic acid responsiveness
SmIAA5	EVM0009745.1	TGACG-motif	TGACG	1765	-	cis-acting regulatory element involved in the MeJA-responsiveness
SmIAA10	EVM0010171.1	ARE	AAACCA	1540	+	cis-acting regulatory element essential for the anaerobic induction
SmIAA10	EVM0010171.1	ARE	AAACCA	1986	+	cis-acting regulatory element essential for the anaerobic induction
SmIAA10	EVM0010171.1	ABRE	ACGTG	752	-	cis-acting element involved in the abscisic acid responsiveness
SmIAA10	EVM0010171.1	ABRE	GCAACGTGTC	1155	-	cis-acting element involved in the abscisic acid responsiveness
SmIAA10	EVM0010171.1	ABRE	ACGTG	1157	-	cis-acting element involved in the abscisic acid responsiveness
SmIAA10	EVM0010171.1	TATC-box	TATCCCA	1216	+	cis-acting element involved in gibberellin-responsiveness
SmIAA10	EVM0010171.1	G-Box	CACGTT	752	+	cis-acting regulatory element involved in light responsiveness
SmIAA10	EVM0010171.1	G-Box	CACGTT	1157	+	cis-acting regulatory element involved in light responsiveness
SmIAA10	EVM0010171.1	LTR	CCGAAA	673	-	cis-acting element involved in low-temperature responsiveness
SmIAA10	EVM0010171.1	G-box	TAAACGTG	752	-	cis-acting regulatory element involved in light responsiveness
SmIAA10	EVM0010171.1	RY-element	CATGCATG	1627	-	cis-acting regulatory element involved in seed-specific regulation
SmIAA12	EVM0010443.1	CAT-box	GCCACT	293	+	cis-acting regulatory element related to meristem expression
SmIAA12	EVM0010443.1	CAT-box	GCCACT	1226	+	cis-acting regulatory element related to meristem expression
SmIAA12	EVM0010443.1	G-box	TACGTG	8	-	cis-acting regulatory element involved in light responsiveness
SmIAA12	EVM0010443.1	G-box	GCCACGTGGA	293	+	cis-acting regulatory element involved in light responsiveness
SmIAA12	EVM0010443.1	G-box	CACGAC	555	-	cis-acting regulatory element involved in light responsiveness
SmIAA12	EVM0010443.1	G-box	CACGAC	1520	+	cis-acting regulatory element involved in light responsiveness
SmIAA12	EVM0010443.1	circadian	CAAAGATATC	1396	-	cis-acting regulatory element involved in circadian control
SmIAA12	EVM0010443.1	ARE	AAACCA	1648	-	cis-acting regulatory element essential for the anaerobic induction
SmIAA12	EVM0010443.1	ABRE	ACGTG	8	-	cis-acting element involved in the abscisic acid responsiveness
SmIAA12	EVM0010443.1	TCA-element	CCATCTTTTT	853	-	cis-acting element involved in salicylic acid responsiveness
SmIAA12	EVM0010443.1	TGACG-motif	TGACG	600	+	cis-acting regulatory element involved in the MeJA-responsiveness
SmIAA12	EVM0010443.1	CGTCA-motif	CGTCA	600	-	cis-acting regulatory element involved in the MeJA-responsiveness
SmIAA20	EVM0010879.1	O2-site	GATGACATGG	282	-	cis-acting regulatory element involved in zein metabolism regulation
SmIAA20	EVM0010879.1	O2-site	GTTGACGTGA	851	+	cis-acting regulatory element involved in zein metabolism regulation
SmIAA20	EVM0010879.1	G-box	TACGTG	1051	+	cis-acting regulatory element involved in light responsiveness
SmIAA20	EVM0010879.1	CAT-box	GCCACT	434	+	cis-acting regulatory element related to meristem expression
SmIAA20	EVM0010879.1	CAT-box	GCCACT	494	-	cis-acting regulatory element related to meristem expression
SmIAA20	EVM0010879.1	CAT-box	GCCACT	702	-	cis-acting regulatory element related to meristem expression
SmIAA20	EVM0010879.1	LTR	CCGAAA	1550	+	cis-acting element involved in low-temperature responsiveness
SmIAA20	EVM0010879.1	LTR	CCGAAA	1782	+	cis-acting element involved in low-temperature responsiveness
SmIAA20	EVM0010879.1	CGTCA-motif	CGTCA	343	+	cis-acting regulatory element involved in the MeJA-responsiveness
SmIAA20	EVM0010879.1	G-Box	CACGTT	848	+	cis-acting regulatory element involved in light responsiveness
SmIAA20	EVM0010879.1	ABRE	ACGTG	848	-	cis-acting element involved in the abscisic acid responsiveness
SmIAA20	EVM0010879.1	ABRE	ACGTG	1052	+	cis-acting element involved in the abscisic acid responsiveness
SmIAA20	EVM0010879.1	TATC-box	TATCCCA	925	+	cis-acting element involved in gibberellin-responsiveness
SmIAA20	EVM0010879.1	TGACG-motif	TGACG	343	-	cis-acting regulatory element involved in the MeJA-responsiveness
SmIAA20	EVM0010879.1	ARE	AAACCA	51	+	cis-acting regulatory element essential for the anaerobic induction
SmIAA20	EVM0010879.1	ARE	AAACCA	1475	-	cis-acting regulatory element essential for the anaerobic induction
SmIAA18	EVM0011993.1	ABRE	GCAACGTGTC	1764	+	cis-acting element involved in the abscisic acid responsiveness
SmIAA18	EVM0011993.1	ABRE	CACGTG	1766	-	cis-acting element involved in the abscisic acid responsiveness
SmIAA18	EVM0011993.1	ABRE	ACGTG	1767	+	cis-acting element involved in the abscisic acid responsiveness
SmIAA18	EVM0011993.1	ARE	AAACCA	659	-	cis-acting regulatory element essential for the anaerobic induction
SmIAA18	EVM0011993.1	TC-rich repeats	GTTTTCTTAC	1552	+	cis-acting element involved in defense and stress responsiveness
SmIAA18	EVM0011993.1	G-Box	CACGTG	1766	-	cis-acting regulatory element involved in light responsiveness
SmIAA18	EVM0011993.1	LTR	CCGAAA	527	+	cis-acting element involved in low-temperature responsiveness
SmIAA18	EVM0011993.1	G-box	GCCACGTGGA	1583	-	cis-acting regulatory element involved in light responsiveness
SmIAA18	EVM0011993.1	G-box	tgACACGTGGCA	1763	-	cis-acting regulatory element involved in light responsiveness
SmIAA18	EVM0011993.1	G-box	ACACGTGGC	1764	-	cis-acting regulatory element involved in light responsiveness
SmIAA18	EVM0011993.1	G-box	CACGTG	1766	-	cis-acting regulatory element involved in light responsiveness
SmIAA18	EVM0011993.1	GCN4_motif	TGAGTCA	1316	+	cis-regulatory element involved in endosperm expression
SmIAA15	EVM0019034.1	ABRE	ACGTG	1471	-	cis-acting element involved in the abscisic acid responsiveness
SmIAA15	EVM0019034.1	ABRE	ACGTG	1628	+	cis-acting element involved in the abscisic acid responsiveness
SmIAA15	EVM0019034.1	ABRE	CGCACGTGTC	1834	+	cis-acting element involved in the abscisic acid responsiveness
SmIAA15	EVM0019034.1	ABRE	CACGTG	1836	-	cis-acting element involved in the abscisic acid responsiveness
SmIAA15	EVM0019034.1	ABRE	ACGTG	1837	+	cis-acting element involved in the abscisic acid responsiveness
SmIAA15	EVM0019034.1	TATC-box	TATCCCA	1015	+	cis-acting element involved in gibberellin-responsiveness
SmIAA15	EVM0019034.1	CGTCA-motif	CGTCA	400	-	cis-acting regulatory element involved in the MeJA-responsiveness
SmIAA15	EVM0019034.1	CGTCA-motif	CGTCA	1133	+	cis-acting regulatory element involved in the MeJA-responsiveness
SmIAA15	EVM0019034.1	CGTCA-motif	CGTCA	1316	-	cis-acting regulatory element involved in the MeJA-responsiveness
SmIAA15	EVM0019034.1	TC-rich repeats	GTTTTCTTAC	687	-	cis-acting element involved in defense and stress responsiveness
SmIAA15	EVM0019034.1	TC-rich repeats	ATTCTCTAAC	1032	+	cis-acting element involved in defense and stress responsiveness
SmIAA15	EVM0019034.1	ACE	CTAACGTATT	834	-	cis-acting element involved in light responsiveness
SmIAA15	EVM0019034.1	ACE	CTAACGTATT	1081	+	cis-acting element involved in light responsiveness
SmIAA15	EVM0019034.1	ACE	GACACGTATG	1625	-	cis-acting element involved in light responsiveness
SmIAA15	EVM0019034.1	G-box	CACGTG	1836	-	cis-acting regulatory element involved in light responsiveness
SmIAA15	EVM0019034.1	LTR	CCGAAA	1618	+	cis-acting element involved in low-temperature responsiveness
SmIAA15	EVM0019034.1	LTR	CCGAAA	1969	+	cis-acting element involved in low-temperature responsiveness
SmIAA15	EVM0019034.1	GCN4_motif	TGAGTCA	539	+	cis-regulatory element involved in endosperm expression
SmIAA15	EVM0019034.1	ARE	AAACCA	328	-	cis-acting regulatory element essential for the anaerobic induction
SmIAA15	EVM0019034.1	ARE	AAACCA	1802	+	cis-acting regulatory element essential for the anaerobic induction
SmIAA15	EVM0019034.1	TGACG-motif	TGACG	400	+	cis-acting regulatory element involved in the MeJA-responsiveness
SmIAA15	EVM0019034.1	TGACG-motif	TGACG	1133	-	cis-acting regulatory element involved in the MeJA-responsiveness
SmIAA15	EVM0019034.1	TGACG-motif	TGACG	1316	+	cis-acting regulatory element involved in the MeJA-responsiveness
SmIAA15	EVM0019034.1	AuxRR-core	GGTCCAT	7	-	cis-acting regulatory element involved in auxin responsiveness
SmIAA15	EVM0019034.1	G-Box	CACGTT	1471	+	cis-acting regulatory element involved in light responsiveness
SmIAA15	EVM0019034.1	G-Box	CACGTT	1627	-	cis-acting regulatory element involved in light responsiveness
SmIAA15	EVM0019034.1	G-Box	CACGTG	1836	-	cis-acting regulatory element involved in light responsiveness
SmIAA17	EVM0020724.1	G-Box	CACGTG	462	+	cis-acting regulatory element involved in light responsiveness
SmIAA17	EVM0020724.1	TC-rich repeats	GTTTTCTTAC	73	-	cis-acting element involved in defense and stress responsiveness
SmIAA17	EVM0020724.1	CGTCA-motif	CGTCA	520	+	cis-acting regulatory element involved in the MeJA-responsiveness
SmIAA17	EVM0020724.1	ABRE	GCAACGTGTC	460	+	cis-acting element involved in the abscisic acid responsiveness
SmIAA17	EVM0020724.1	ABRE	CACGTG	462	+	cis-acting element involved in the abscisic acid responsiveness
SmIAA17	EVM0020724.1	ABRE	ACGTG	463	+	cis-acting element involved in the abscisic acid responsiveness
SmIAA17	EVM0020724.1	TGACG-motif	TGACG	520	-	cis-acting regulatory element involved in the MeJA-responsiveness
SmIAA17	EVM0020724.1	LTR	CCGAAA	739	-	cis-acting element involved in low-temperature responsiveness
SmIAA17	EVM0020724.1	LTR	CCGAAA	1308	+	cis-acting element involved in low-temperature responsiveness
SmIAA17	EVM0020724.1	G-box	tgACACGTGGCA	459	-	cis-acting regulatory element involved in light responsiveness
SmIAA17	EVM0020724.1	G-box	ACACGTGGC	460	-	cis-acting regulatory element involved in light responsiveness
SmIAA17	EVM0020724.1	G-box	CACGTG	462	+	cis-acting regulatory element involved in light responsiveness
SmIAA19	EVM0021151.1	G-Box	CACGTG	1791	-	cis-acting regulatory element involved in light responsiveness
SmIAA19	EVM0021151.1	CGTCA-motif	CGTCA	1474	+	cis-acting regulatory element involved in the MeJA-responsiveness
SmIAA19	EVM0021151.1	ARE	AAACCA	1321	+	cis-acting regulatory element essential for the anaerobic induction
SmIAA19	EVM0021151.1	TGACG-motif	TGACG	1474	-	cis-acting regulatory element involved in the MeJA-responsiveness
SmIAA19	EVM0021151.1	ABRE	GACACGTGGC	1789	-	cis-acting element involved in the abscisic acid responsiveness
SmIAA19	EVM0021151.1	ABRE	CACGTG	1791	-	cis-acting element involved in the abscisic acid responsiveness
SmIAA19	EVM0021151.1	ABRE	ACGTG	1792	+	cis-acting element involved in the abscisic acid responsiveness
SmIAA19	EVM0021151.1	RY-element	CATGCATG	51	+	cis-acting regulatory element involved in seed-specific regulation
SmIAA19	EVM0021151.1	LTR	CCGAAA	1123	-	cis-acting element involved in low-temperature responsiveness
SmIAA19	EVM0021151.1	G-box	CACGTG	1791	-	cis-acting regulatory element involved in light responsiveness
SmIAA19	EVM0021151.1	CAT-box	GCCACT	1928	+	cis-acting regulatory element related to meristem expression
SmIAA6	EVM0021654.1	G-box	TACGTG	1090	-	cis-acting regulatory element involved in light responsiveness
SmIAA6	EVM0021654.1	G-box	CACGTC	1665	-	cis-acting regulatory element involved in light responsiveness
SmIAA6	EVM0021654.1	G-box	TACGTG	1690	-	cis-acting regulatory element involved in light responsiveness
SmIAA6	EVM0021654.1	ARE	AAACCA	706	-	cis-acting regulatory element essential for the anaerobic induction
SmIAA6	EVM0021654.1	TCA-element	CCATCTTTTT	1143	+	cis-acting element involved in salicylic acid responsiveness
SmIAA6	EVM0021654.1	TGACG-motif	TGACG	53	-	cis-acting regulatory element involved in the MeJA-responsiveness
SmIAA6	EVM0021654.1	TGACG-motif	TGACG	493	+	cis-acting regulatory element involved in the MeJA-responsiveness
SmIAA6	EVM0021654.1	TGACG-motif	TGACG	977	+	cis-acting regulatory element involved in the MeJA-responsiveness
SmIAA6	EVM0021654.1	TGACG-motif	TGACG	1664	+	cis-acting regulatory element involved in the MeJA-responsiveness
SmIAA6	EVM0021654.1	TATC-box	TATCCCA	329	+	cis-acting element involved in gibberellin-responsiveness
SmIAA6	EVM0021654.1	TATC-box	TATCCCA	509	+	cis-acting element involved in gibberellin-responsiveness
SmIAA6	EVM0021654.1	TATC-box	TATCCCA	1871	-	cis-acting element involved in gibberellin-responsiveness
SmIAA6	EVM0021654.1	ABRE	ACGTG	1090	-	cis-acting element involved in the abscisic acid responsiveness
SmIAA6	EVM0021654.1	ABRE	ACGTG	1666	+	cis-acting element involved in the abscisic acid responsiveness
SmIAA6	EVM0021654.1	ABRE	TACGTGTC	1688	-	cis-acting element involved in the abscisic acid responsiveness
SmIAA6	EVM0021654.1	ABRE	ACGTG	1690	-	cis-acting element involved in the abscisic acid responsiveness
SmIAA6	EVM0021654.1	ABRE	ACGTG	1696	+	cis-acting element involved in the abscisic acid responsiveness
SmIAA6	EVM0021654.1	G-Box	CACGTT	1695	-	cis-acting regulatory element involved in light responsiveness
SmIAA6	EVM0021654.1	CGTCA-motif	CGTCA	53	+	cis-acting regulatory element involved in the MeJA-responsiveness
SmIAA6	EVM0021654.1	CGTCA-motif	CGTCA	493	-	cis-acting regulatory element involved in the MeJA-responsiveness
SmIAA6	EVM0021654.1	CGTCA-motif	CGTCA	977	-	cis-acting regulatory element involved in the MeJA-responsiveness
SmIAA6	EVM0021654.1	CGTCA-motif	CGTCA	1664	-	cis-acting regulatory element involved in the MeJA-responsiveness
SmIAA4	EVM0022630.1	ABRE	AACCCGG	555	-	cis-acting element involved in the abscisic acid responsiveness
SmIAA4	EVM0022630.1	ABRE	ACGTG	927	-	cis-acting element involved in the abscisic acid responsiveness
SmIAA4	EVM0022630.1	ABRE	AACCCGG	1132	-	cis-acting element involved in the abscisic acid responsiveness
SmIAA4	EVM0022630.1	ABRE	ACGTG	1301	-	cis-acting element involved in the abscisic acid responsiveness
SmIAA4	EVM0022630.1	ABRE	ACGTG	1419	-	cis-acting element involved in the abscisic acid responsiveness
SmIAA4	EVM0022630.1	ABRE	ACGTG	1958	+	cis-acting element involved in the abscisic acid responsiveness
SmIAA4	EVM0022630.1	ARE	AAACCA	194	-	cis-acting regulatory element essential for the anaerobic induction
SmIAA4	EVM0022630.1	ARE	AAACCA	1079	+	cis-acting regulatory element essential for the anaerobic induction
SmIAA4	EVM0022630.1	TC-rich repeats	ATTCTCTAAC	466	-	cis-acting element involved in defense and stress responsiveness
SmIAA4	EVM0022630.1	G-Box	CACGTT	927	+	cis-acting regulatory element involved in light responsiveness
SmIAA4	EVM0022630.1	LTR	CCGAAA	308	+	cis-acting element involved in low-temperature responsiveness
SmIAA4	EVM0022630.1	LTR	CCGAAA	1723	+	cis-acting element involved in low-temperature responsiveness
SmIAA4	EVM0022630.1	ACE	CTAACGTATT	601	-	cis-acting element involved in light responsiveness
SmIAA4	EVM0022630.1	ACE	CTAACGTATT	1595	+	cis-acting element involved in light responsiveness
SmIAA4	EVM0022630.1	G-box	TAACACGTAG	108	+	cis-acting regulatory element involved in light responsiveness
SmIAA4	EVM0022630.1	G-box	TACGTG	1301	-	cis-acting regulatory element involved in light responsiveness
SmIAA4	EVM0022630.1	G-box	TACGTG	1419	-	cis-acting regulatory element involved in light responsiveness
SmIAA4	EVM0022630.1	G-box	CACGAC	1665	+	cis-acting regulatory element involved in light responsiveness
SmIAA4	EVM0022630.1	G-box	CACGTC	1957	-	cis-acting regulatory element involved in light responsiveness
SmIAA13	EVM0025242.1	GCN4_motif	TGAGTCA	1913	+	cis-regulatory element involved in endosperm expression
SmIAA13	EVM0025242.1	circadian	CAAAGATATC	1588	-	cis-acting regulatory element involved in circadian control
SmIAA13	EVM0025242.1	CAT-box	GCCACT	205	-	cis-acting regulatory element related to meristem expression
SmIAA13	EVM0025242.1	CAT-box	GCCACT	561	-	cis-acting regulatory element related to meristem expression
SmIAA13	EVM0025242.1	G-box	CACGAC	5	-	cis-acting regulatory element involved in light responsiveness
SmIAA13	EVM0025242.1	G-box	CACGTC	317	+	cis-acting regulatory element involved in light responsiveness
SmIAA13	EVM0025242.1	CGTCA-motif	CGTCA	319	+	cis-acting regulatory element involved in the MeJA-responsiveness
SmIAA13	EVM0025242.1	TC-rich repeats	ATTCTCTAAC	1970	-	cis-acting element involved in defense and stress responsiveness
SmIAA13	EVM0025242.1	ARE	AAACCA	1949	-	cis-acting regulatory element essential for the anaerobic induction
SmIAA13	EVM0025242.1	TATC-box	TATCCCA	1814	-	cis-acting element involved in gibberellin-responsiveness
SmIAA13	EVM0025242.1	ABRE	ACGTG	317	-	cis-acting element involved in the abscisic acid responsiveness
SmIAA13	EVM0025242.1	ABRE	GCAACGTGTC	1174	-	cis-acting element involved in the abscisic acid responsiveness
SmIAA13	EVM0025242.1	TCA-element	CCATCTTTTT	495	-	cis-acting element involved in salicylic acid responsiveness
SmIAA13	EVM0025242.1	TGACG-motif	TGACG	319	-	cis-acting regulatory element involved in the MeJA-responsiveness
SmIAA8	EVM0026407.1	O2-site	GATGATGTGG	70	-	cis-acting regulatory element involved in zein metabolism regulation
SmIAA8	EVM0026407.1	CAT-box	GCCACT	19	+	cis-acting regulatory element related to meristem expression
SmIAA8	EVM0026407.1	CAT-box	GCCACT	1077	+	cis-acting regulatory element related to meristem expression
SmIAA8	EVM0026407.1	G-box	CACGTC	1202	+	cis-acting regulatory element involved in light responsiveness
SmIAA8	EVM0026407.1	LTR	CCGAAA	691	-	cis-acting element involved in low-temperature responsiveness
SmIAA8	EVM0026407.1	ARE	AAACCA	1605	-	cis-acting regulatory element essential for the anaerobic induction
SmIAA8	EVM0026407.1	TCA-element	CCATCTTTTT	1044	+	cis-acting element involved in salicylic acid responsiveness
SmIAA8	EVM0026407.1	ABRE	ACGTG	1202	-	cis-acting element involved in the abscisic acid responsiveness
SmIAA8	EVM0026407.1	TATC-box	TATCCCA	1736	+	cis-acting element involved in gibberellin-responsiveness
SmIAA11	EVM0027652.1	TC-rich repeats	ATTCTCTAAC	350	+	cis-acting element involved in defense and stress responsiveness
SmIAA11	EVM0027652.1	TATC-box	TATCCCA	1055	-	cis-acting element involved in gibberellin-responsiveness
SmIAA11	EVM0027652.1	TCA-element	CCATCTTTTT	406	+	cis-acting element involved in salicylic acid responsiveness
SmIAA11	EVM0027652.1	circadian	CAAAGATATC	913	-	cis-acting regulatory element involved in circadian control
SmIAA11	EVM0027652.1	ACE	CTAACGTATT	1894	+	cis-acting element involved in light responsiveness
