# Supplementary material for: Genome-wide identification and co-expression network analysis of Aux/IAA gene family in Salvia miltiorrhiza
Source: PeerJ. 2023 Apr 17;11:e15212. doi: 10.7717/peerj.15212 (PMC10117383; doi:10.7717/peerj.15212)
Supplement: Supplemental Information 2 [file peerj-11-15212-s002.xlsx]

## Sheet: Sheet1
QueryID	Gene Name	Reference
AT4G14560.1	AtIAA1	Genetics of Aux/IAA and ARF action in plant growth and development
AT3G23030.1	AtIAA2	Genetics of Aux/IAA and ARF action in plant growth and development
AT1G04240.1	AtIAA3	Genetics of Aux/IAA and ARF action in plant growth and development
AT5G43700.1	AtIAA4	Genetics of Aux/IAA and ARF action in plant growth and development
AT1G15580.1	AtIAA5	Genetics of Aux/IAA and ARF action in plant growth and development
AT1G52830.1	AtIAA6	Genetics of Aux/IAA and ARF action in plant growth and development
AT3G23050.1	AtIAA7	Genetics of Aux/IAA and ARF action in plant growth and development
AT2G22670.1	AtIAA8	Genetics of Aux/IAA and ARF action in plant growth and development
AT5G65670.1	AtIAA9	Genetics of Aux/IAA and ARF action in plant growth and development
AT1G04100.1	AtIAA10	Genetics of Aux/IAA and ARF action in plant growth and development
AT4G28640.1	AtIAA11	Genetics of Aux/IAA and ARF action in plant growth and development
AT1G04550.1	AtIAA12	Genetics of Aux/IAA and ARF action in plant growth and development
AT2G33310.1	AtIAA13	Genetics of Aux/IAA and ARF action in plant growth and development
AT4G14550.1	AtIAA14	Genetics of Aux/IAA and ARF action in plant growth and development
AT1G80390.1	AtIAA15	Genetics of Aux/IAA and ARF action in plant growth and development
AT3G04730.1	AtIAA16	Genetics of Aux/IAA and ARF action in plant growth and development
AT1G04250.1	AtIAA17	Genetics of Aux/IAA and ARF action in plant growth and development
AT1G51950.1	AtIAA18	Genetics of Aux/IAA and ARF action in plant growth and development
AT3G15540.1	AtIAA19	Genetics of Aux/IAA and ARF action in plant growth and development
AT2G46990.1	AtIAA20	Genetics of Aux/IAA and ARF action in plant growth and development
AT3G16500.1	AtIAA26	Genetics of Aux/IAA and ARF action in plant growth and development
AT4G29080.1	AtIAA27	Genetics of Aux/IAA and ARF action in plant growth and development
AT5G25890.1	AtIAA28	Genetics of Aux/IAA and ARF action in plant growth and development
AT4G32280.1	AtIAA29	Genetics of Aux/IAA and ARF action in plant growth and development
AT3G62100.1	AtIAA30	Genetics of Aux/IAA and ARF action in plant growth and development
AT3G17600.1	AtIAA31	Genetics of Aux/IAA and ARF action in plant growth and development
AT2G01200.1	AtIAA32	Genetics of Aux/IAA and ARF action in plant growth and development
AT5G57420.1	AtIAA33	Genetics of Aux/IAA and ARF action in plant growth and development
AT1G15050.1	AtIAA34	Genetics of Aux/IAA and ARF action in plant growth and development
LOC_Os01g08320	OsIAA1	Structure and expression analysis of early auxin-responsive Aux/IAA gene family in rice (Oryza sativa)
LOC_Os01g09450	OsIAA2	Structure and expression analysis of early auxin-responsive Aux/IAA gene family in rice (Oryza sativa)
LOC_Os01g13030	OsIAA3	Structure and expression analysis of early auxin-responsive Aux/IAA gene family in rice (Oryza sativa)
LOC_Os01g18360	OsIAA4	Structure and expression analysis of early auxin-responsive Aux/IAA gene family in rice (Oryza sativa)
LOC_Os01g48444	OsIAA5	Structure and expression analysis of early auxin-responsive Aux/IAA gene family in rice (Oryza sativa)
LOC_Os01g53880	OsIAA6	Structure and expression analysis of early auxin-responsive Aux/IAA gene family in rice (Oryza sativa)
LOC_Os02g13520	OsIAA7	Structure and expression analysis of early auxin-responsive Aux/IAA gene family in rice (Oryza sativa)
LOC_Os02g49160	OsIAA8	Structure and expression analysis of early auxin-responsive Aux/IAA gene family in rice (Oryza sativa)
LOC_Os02g56120	OsIAA9	Structure and expression analysis of early auxin-responsive Aux/IAA gene family in rice (Oryza sativa)
LOC_Os02g57250	OsIAA10	Structure and expression analysis of early auxin-responsive Aux/IAA gene family in rice (Oryza sativa)
LOC_Os03g43400	OsIAA11	Structure and expression analysis of early auxin-responsive Aux/IAA gene family in rice (Oryza sativa)
LOC_Os03g43410	OsIAA12	Structure and expression analysis of early auxin-responsive Aux/IAA gene family in rice (Oryza sativa)
LOC_Os03g53150	OsIAA13	Structure and expression analysis of early auxin-responsive Aux/IAA gene family in rice (Oryza sativa)
LOC_Os03g58350	OsIAA14	Structure and expression analysis of early auxin-responsive Aux/IAA gene family in rice (Oryza sativa)
LOC_Os05g08570	OsIAA15	Structure and expression analysis of early auxin-responsive Aux/IAA gene family in rice (Oryza sativa)
LOC_Os05g09480	OsIAA16	Structure and expression analysis of early auxin-responsive Aux/IAA gene family in rice (Oryza sativa)
LOC_Os05g14180	OsIAA17	Structure and expression analysis of early auxin-responsive Aux/IAA gene family in rice (Oryza sativa)
LOC_Os05g44810	OsIAA18	Structure and expression analysis of early auxin-responsive Aux/IAA gene family in rice (Oryza sativa)
LOC_Os05g48590	OsIAA19	Structure and expression analysis of early auxin-responsive Aux/IAA gene family in rice (Oryza sativa)
LOC_Os06g07040	OsIAA20	Structure and expression analysis of early auxin-responsive Aux/IAA gene family in rice (Oryza sativa)
LOC_Os06g22870	OsIAA21	Structure and expression analysis of early auxin-responsive Aux/IAA gene family in rice (Oryza sativa)
LOC_Os06g24850	OsIAA22	Structure and expression analysis of early auxin-responsive Aux/IAA gene family in rice (Oryza sativa)
LOC_Os06g39590	OsIAA23	Structure and expression analysis of early auxin-responsive Aux/IAA gene family in rice (Oryza sativa)
LOC_Os07g08460	OsIAA24	Structure and expression analysis of early auxin-responsive Aux/IAA gene family in rice (Oryza sativa)
LOC_Os08g01780	OsIAA25	Structure and expression analysis of early auxin-responsive Aux/IAA gene family in rice (Oryza sativa)
LOC_Os09g35870	OsIAA26	Structure and expression analysis of early auxin-responsive Aux/IAA gene family in rice (Oryza sativa)
LOC_Os11g11410	OsIAA27	Structure and expression analysis of early auxin-responsive Aux/IAA gene family in rice (Oryza sativa)
LOC_Os11g11420	OsIAA28	Structure and expression analysis of early auxin-responsive Aux/IAA gene family in rice (Oryza sativa)
LOC_Os11g11430	OsIAA29	Structure and expression analysis of early auxin-responsive Aux/IAA gene family in rice (Oryza sativa)
LOC_Os12g40890	OsIAA30	Structure and expression analysis of early auxin-responsive Aux/IAA gene family in rice (Oryza sativa)
LOC_Os12g40900	OsIAA31	Structure and expression analysis of early auxin-responsive Aux/IAA gene family in rice (Oryza sativa)
EVM0000296.1	SmIAA1	-
EVM0009395.1	SmIAA2	-
EVM0004349.1	SmIAA3	-
EVM0022630.1	SmIAA4	-
EVM0009745.1	SmIAA5	-
EVM0021654.1	SmIAA6	-
EVM0001033.1	SmIAA7	-
EVM0026407.1	SmIAA8	-
EVM0002334.1	SmIAA9	-
EVM0010171.1	SmIAA10	-
EVM0027652.1	SmIAA11	-
EVM0010443.1	SmIAA12	-
EVM0025242.1	SmIAA13	-
EVM0003584.1	SmIAA14	-
EVM0019034.1	SmIAA15	-
EVM0009041.1	SmIAA16	-
EVM0020724.1	SmIAA17	-
EVM0011993.1	SmIAA18	-
EVM0021151.1	SmIAA19	-
EVM0010879.1	SmIAA20	-
EVM0004282.1	SmIAA21	-
EVM0006475.1	SmIAA22	-
EVM0007611.1	SmIAA23	-
