# Supplementary material for: Genome-wide identification and co-expression network analysis of Aux/IAA gene family in Salvia miltiorrhiza
Source: PeerJ. 2023 Apr 17;11:e15212. doi: 10.7717/peerj.15212 (PMC10117383; doi:10.7717/peerj.15212)
Supplement: Supplemental Information 3 [file peerj-11-15212-s003.xlsx]

## Sheet: Sheet1
Geneid	Root1	Root2	Root3	Stem1	Stem2	Stem3	Flower3	Flower2	Flower1	Leaf1	Leaf2	Leaf3	withering3	withering2	withering1	blooming3	blooming2	blooming1	bud3	bud2	bud1
EVM0009763	0	0	0	0	0	0	1.64501	2.34584	1.45897	0	0	0	0	0.286329	0	0	0.594815	0	0	0.270724	0
EVM0015750	0	0	0	0	0	0	0	0	0	0	0	0	0	0	0.105527	0	0	0	0	0	0
EVM0024869	30.934	35.1799	30.3628	35.8902	35.0787	33.3989	16.4123	23.7979	23.6452	22.0291	18.5694	20.5905	71.7268	38.7222	66.7645	46.3325	45.7147	51.7495	48.6478	28.0841	25.1958
EVM0017077	0	0	0	0	0	0	39.0602	51.4812	41.2113	1.44235	0	0	68.9314	76.2286	73.0113	123.958	109.137	115.919	96.1264	101.995	112.395
EVM0007898	0	0	0	0	0	0	0	0	0	0	0	0	0	0	0	0	0	0	0	0	0
EVM0008920	0.13743	0.437327	0.404676	0.133097	0.472513	0.507516	0.580286	0.18389	0.522828	0.12571	0.0622387	0.323755	2.90232	3.59124	3.19264	4.86828	8.29969	3.22065	1.49986	1.78265	1.84386
EVM0016376	4.47732	4.74922	2.37412	11.3139	10.1615	10.6903	39.4038	44.3468	47.6734	9.41495	9.08957	6.64378	26.7633	25.2153	26.7804	42.9506	38.6928	42.1018	40.9015	39.4808	41.7422
EVM0019008	0.469042	1.24382	0.422016	1.02207	0.72954	0.46912	1.39368	0.24407	1.37547	0.500551	0.318628	0.405153	2.27001	2.29815	2.17927	2.54767	2.22793	2.10957	1.7565	2.41433	1.8593
EVM0016330	0	0	0	0	0	0	0	0	0	0	0	0	0	0	0	0	0	0	0	0	0
EVM0028053	0	0	0	0	0	0	0	0	0	0	0	0.0842715	0	0	0.118718	0	0.121369	0.254035	0	0.110479	0
EVM0004978	0	0	0	0	0	0	0	0	0	0	0	0	0	0	0	0	0	0	0	0	0
EVM0005937	7.90563	9.15981	10.9829	12.4858	9.43878	9.43219	7.64623	7.26917	9.25405	3.89387	3.5252	5.04281	34.836	35.4375	31.9684	43.6013	58.5967	36.1035	24.6735	26.4443	25.0706
EVM0026529	0.526516	0.223396	0.516793	1.73372	0.310333	0.583314	2.96423	3.09986	2.40365	0.481616	0.476894	0.595373	9.72938	11.5573	11.3229	12.832	14.1481	13.9093	14.3317	12.0982	12.4586
EVM0008851	0.841697	0.624969	0.90877	0.407581	0.826839	0.310832	0.236933	1.05116	1.20078	0.38496	0.457422	0.237943	2.66632	2.63938	3.79898	3.22014	3.19842	3.22774	2.80983	3.2234	4.41448
EVM0004597	0	0	0	0	0	0	0	0	0	0	0	0	0	0	0	0	0	0	0	0	0
EVM0010502	0	0	0	0	0	0	0.666952	0.211354	0.150228	0	0	0	0.208487	0	0.104842	0	0	0.336514	0	0.195132	0
EVM0005118	119.606	120.651	121.875	71.4584	70.8195	69.9998	45.1581	44.3316	42.8797	55.0395	56.1884	55.7521	40.0177	38.6198	38.196	38.2676	42.8771	42.6083	40.7227	44.0301	42.2752
EVM0026518	8.05879	8.17654	10.036	9.47057	9.7314	9.49865	7.17315	8.69476	8.81578	6.87624	6.26066	5.58289	9.33358	8.4069	7.23066	9.20737	8.47281	8.86718	7.32071	9.01117	7.57599
EVM0026418	0.233895	0	0.0573939	0.736193	0.861622	0.647815	1.59114	2.55589	1.72401	0.534872	0.264814	0.110201	2.77849	3.51441	3.6483	1.65709	1.2697	1.3288	14.3398	10.6188	12.1958
EVM0005565	2.36932	3.51849	2.48061	0.30595	0.155167	0	0	0.140903	0.450684	1.01139	3.00443	1.0419	0	0.61914	0.838736	0.223815	1.07183	0.673029	0.202807	0.585397	0.192658
EVM0003863	0	0	0	0	0.0532988	0	0.152729	0	0.0516025	0	0	0	0.286456	0.638013	0.14405	0.153758	0.441799	0.0770605	0.0696631	0.20108	0
EVM0018061	0	0	0	0	0	0	0	0	0.0784241	0	0	0	0.108837	0.107737	0.109462	0.116839	0.111906	0.117115	0	0	0
EVM0008007	8.5979	9.60689	10.3012	12.5347	13.7062	12.2599	16.6232	16.5677	18.9155	6.82913	6.65132	5.33402	15.2256	15.5914	18.7655	31.0857	18.8938	34.9399	22.7858	17.5766	21.1231
EVM0023581	0	0	0	0	0	0	0	0	0	0	0	0	0	0.0277819	0	0.0602578	0	0	0	0	0
EVM0011796	48.1712	54.5505	49.5064	33.5132	35.2163	33.2738	71.0497	62.3633	67.4319	60.4155	58.1751	61.3355	40.8289	43.4194	39.0717	45.0067	41.4603	47.6973	41.1922	34.8616	37.4956
EVM0000211	0	0	0	0	0	0	0	0	0	0	0	0	0	0	0	0	0	0	0	0	0
EVM0013814	39.8556	33.2169	42.5043	27.4543	28.8717	27.2082	15.162	19.9941	18.6098	34.9898	34.7557	35.5541	16.6709	15.9262	16.3408	17.7261	19.372	17.9388	15.2901	14.2657	13.6447
EVM0025587	0	0	0	0	0	0.104454	0.106161	0	0	0	0.102477	0	0.149335	0.147826	0	0	0.153545	0.803461	0.871599	1.67723	2.89794
EVM0000427	0	0.061876	0.114513	0	0.171911	0	0.930498	0.78054	0.721239	0	0.158507	0.274842	0.538966	0.533519	0.232312	0.330623	0.316664	0.414254	0.449386	0.720632	0.782646
EVM0026210	33.3829	36.3309	31.5869	17.8464	21.8406	17.0744	6.45269	7.92123	5.65149	15.207	15.6022	18.7485	4.23001	3.57662	5.05198	0.851437	2.08403	0.948275	0.857245	0.659843	1.30296
EVM0021157	0.711258	0.301781	0.418875	1.03325	1.25767	1.44464	0.333693	0.571027	0.608819	0.390363	0.837493	0.67023	0.84492	0.371725	0.472095	0.806256	0.868743	1.0102	0.182645	0.0878666	0.260258
EVM0005256	1.24158	1.20345	1.15562	0.559757	0.567776	0.474317	0.823532	1.18393	1.24193	0.665758	1.10518	0.766527	0.791136	1.0069	0.880931	0.69764	0.784392	1.06413	0.577188	1.00491	0.809403
EVM0002235	2.06356	1.31333	0.994316	0.254355	0.810855	0.450307	0.28164	0.435096	0.785048	0.0686396	0.271866	0.0707101	12.3806	11.7652	11.9038	12.4933	12.2714	10.5512	11.3689	13.1634	11.8525
EVM0025429	0	0	0	0	0	0	0	0	0.121126	0	0	0	0	0	0	0.0902289	0	0	0	0	0
EVM0006630	3.82542	4.8631	3.86944	4.12904	4.70455	6.09294	9.15175	9.11723	8.27643	3.89988	4.02034	4.10007	10.8308	10.5687	10.8155	13.0339	12.9592	14.3089	9.52342	10.7142	8.94
EVM0003219	0	0	0	0	0	0	0	0	0	0	0	0	0	0	0	0	0	0	0	0	0
EVM0020705	0.977563	2.07386	1.05546	2.55621	2.59283	2.70755	2.66006	2.52889	3.02167	1.3413	0.841161	2.02658	5.74183	5.23677	5.7748	4.77881	4.77605	3.26281	3.82821	3.13989	2.92123
EVM0008478	0.427005	0.0905873	0.461032	0	0.0419467	0.118267	2.36393	1.2189	1.25896	0.234355	0.541466	0.160949	2.64896	2.67799	2.77754	2.96473	2.37595	3.39626	1.58994	1.16052	0.989559
EVM0019673	1.21745	1.41799	1.2184	1.98823	2.53261	1.78515	1.43354	1.49061	1.74819	1.31015	1.53514	1.43965	1.26033	1.09165	1.23588	1.18387	1.52264	1.72914	1.19535	1.23858	1.19376
EVM0025595	1.19631	1.1536	1.17422	2.26453	1.60254	1.15468	3.26551	3.39552	3.20651	2.88496	3.20144	1.69096	4.44999	4.19188	4.33118	1.46397	2.50913	3.16655	2.30402	4.76954	4.37745
EVM0007609	10.3749	10.0012	12.7636	13.9855	14.8057	15.7915	4.86749	3.87706	4.367	16.5437	16.3498	17.0758	3.83988	3.75528	4.18764	6.85376	5.6606	6.1232	4.77035	4.28672	5.13016
EVM0021595	7.57127	8.39406	8.35515	12.4695	12.8583	11.4921	8.58932	9.73021	10.008	26.1374	25.2224	19.9525	15.3007	20.9586	16.9785	22.0624	18.2283	24.7877	19.9367	18.1782	16.6956
EVM0002361	9.52314	9.30698	6.30155	16.995	22.2839	16.1023	0.602408	0.381801	0.508837	6.36199	7.85029	5.04146	0.282466	0.139806	0.142044	0	0.29043	0.303948	0.686928	0.264373	0.261021
EVM0007983	1.31149	1.98734	2.52857	1.90522	3.86502	3.02702	8.96575	4.26181	4.76661	4.58438	3.81821	4.06061	4.14217	3.97791	5.34734	5.77407	6.86519	5.58813	5.47267	5.14984	4.74177
EVM0001102	0.0647516	0	0.063556	0	0.0636086	0.0597807	0.364545	0.346568	0.246337	0.11846	0.117298	0.122033	2.3076	2.45349	1.71915	3.02775	3.3393	2.39113	1.82904	2.39976	4.50175
EVM0010375	0	0	0	0	0	0	0	0	0	0	0	0	0	0	0	0	0	0	0	0	0
EVM0027621	2.35048	2.84384	1.76636	10.8839	9.77713	8.74795	24.0192	23.1951	22.3201	19.4511	19.8925	20.0725	19.5841	20.01	18.6727	22.8453	24.4726	22.3255	6.08299	6.03427	6.76409
add_RNAAddG005923	0	0.845977	0.195704	0	0.587598	0.184079	0	0.711443	0.568896	0.72953	0.902972	0	0	0	0	0	0	0	0	0	0
EVM0026392	19.2079	20.5317	16.2327	7.68513	8.3052	6.29908	20.1803	16.9358	17.3513	9.83642	11.0163	9.8536	8.3204	10.2712	9.05732	14.0812	10.4673	10.4278	7.33197	9.07008	8.95509
EVM0023013	0	0	0	0	0	0	0	0	0	0	0	0	0	0	0	0	0	0	0	0	0
EVM0008646	28.3792	33.9791	31.9466	3.04155	2.412	1.84511	0.642946	0.967796	1.14046	8.25259	7.75792	10.4386	12.3604	14.7722	15.3118	20.3892	17.2811	18.4098	14.9563	15.8011	12.1881
EVM0007052	0	0	0	0	0	0	0.0644762	0	0	0	0	0	0	0	0.0912184	0	0.0932549	0.0975955	0	0	0
EVM0012402	0	0	0	0	0	0	0	0	0	0	0	0	0	0	0	0	0	0	0	0	0
EVM0004879	0.61195	0.649114	0.150163	0	0	0	0	0	0	0	0	0.144163	0	0	0	0	0.622872	0	0	0.188996	0
EVM0003304	3.54859	2.42845	2.0786	1.94008	1.91165	2.48355	0.268524	0.306339	0.598791	0	0.0518412	0	1.13319	1.19652	1.36763	0.1622	0.776759	0.325165	0.220463	0.353534	0.488672
EVM0009495	6.90428	6.30507	6.64216	5.0039	5.56966	4.64349	0.858067	1.91702	1.39159	2.42582	2.94043	2.45591	1.50879	1.25457	1.15326	0.777461	0.992849	1.36377	3.75727	3.38914	2.78848
EVM0019161	0	0	0	0	0	0	0	0	0	0	0	0	0	0	0	0	0	0	0	0	0
EVM0024476	0	0	0	0	0	0	0	0	0	0	0	0	0	0	0	0	0	0	0	0	0
EVM0018443	0	0	0	0	0	0	0	0	0	0	0	0	0	0	0	0	0	0	0	0	0
EVM0017633	0	0	0	0.569382	0	0.0678477	0.206869	1.90112	0.0698946	0.0672225	0.0665635	0.138501	0.581999	0.672138	0.195114	0.83305	0.398939	0.208754	0	0	0.0896356
EVM0023531	0	0	0	0	0	0	0	0	0	0	0	0	0	0.122712	0.124677	0	0	0	0	0.116025	0
EVM0025162	0.543576	0	0	0	0	0.125461	0.127512	0	0.258493	0	0	0	0.179368	1.06534	0.541195	0.385111	0.92213	0.38602	0.523446	1.34303	0.165751
EVM0003379	0	0	0.173853	0.42885	0.521992	1.14468	5.48454	3.39705	6.40146	2.99736	3.93056	2.67051	0.467577	1.96712	0.705393	0.376465	1.32209	0.880492	2.2742	3.93864	1.51228
EVM0000097	19.6227	18.6016	24.5352	14.5526	20.6308	21.3804	20.7014	23.8752	22.9334	24.9026	27.989	13.36	32.4336	27.8559	34.4034	27.7042	23.7036	29.9289	21.9716	18.9125	20.1821
EVM0018841	0.888586	0.589093	0	0.430286	0	0.102546	7.1913	4.16145	3.38047	0.203202	0.100605	0	2.93214	3.04764	1.91684	2.04601	1.50741	2.52411	4.70624	1.78381	3.25144
EVM0013696	39.0221	47.0731	39.9913	37.8845	36.1723	35.8939	50.1213	52.6834	50.9397	33.0698	32.0092	36.5007	44.8782	44.4247	42.914	47.7033	41.6655	50.5327	43.103	42.0626	37.9714
EVM0020969	5.5107	5.27855	6.62186	8.53916	9.12081	9.12693	11.3757	11.5298	13.0234	9.25668	13.7035	9.97651	11.6378	11.7821	11.9264	14.2918	15.4561	15.2268	11.1064	9.81966	9.69517
EVM0023058	1.05881	0.616612	0.978129	0.945007	0.795389	2.12756	0.974021	0.796351	0.750328	0.398803	0.394893	0.430396	2.52106	2.63121	2.17725	3.17708	2.31039	3.8333	2.71894	2.69299	2.53224
EVM0017447	13.9066	16.1629	16.9383	3.82265	5.63577	4.27966	2.41165	2.57932	2.18256	3.90436	4.36493	4.88711	4.24054	4.31762	4.20396	5.65786	4.11096	4.69342	5.18574	5.83998	4.36644
EVM0012493	54.5881	57.2954	58.9994	7.41552	5.0145	5.19362	32.8439	32.5718	35.5201	16.1043	18.9187	16.492	77.0704	78.6056	70.9441	69.0087	68.7814	70.9471	61.2608	59.1355	63.7225
EVM0009260	0.271619	0.288115	0	0.657641	0.800475	0.45974	3.99288	2.74603	3.27221	2.94007	2.91124	2.21824	1.67307	1.71531	1.68267	2.50167	2.51892	2.76476	1.51124	2.237	1.98778
EVM0011295	0	0	0	0	0	0	0	0	0	0	0	0	0	0	0.165597	0	0	0	0	0	0
EVM0010553	19.9511	22.0581	16.4194	1.11474	0.829187	1.20435	0.144004	0.0684511	0.218944	0.701914	0.139006	0.578469	0.202567	0.300781	0.203731	0.43492	0.416558	0.544934	0.492623	0.284388	0.561566
EVM0005185	0	0	0	0	0	0	0	0.264622	0.282136	0	0	0	0	0	0	0	0.402588	0.210663	0	0.183234	0
EVM0015485	0.28787	0	0.282555	0	0.424183	0.132885	0	0.128397	0	0	0	0	0.379964	0	0.191073	0	0	0.204431	0.184807	0.177813	0
EVM0006721	1.41015	0.186973	1.38411	22.8753	21.6446	21.4812	40.6873	35.0643	44.5938	22.0894	31.6119	28.4032	53.9769	54.1224	59.9027	74.1799	56.2165	56.8303	68.349	73.6016	68.7986
add_RNAAddG001188	1.75968	0.878376	1.52399	0.200495	0.508418	0	0.679881	0.277009	0.886026	0	0.0937553	0.390159	3.68888	1.89343	2.06115	1.90671	1.82621	1.32315	1.32903	1.53449	1.51503
EVM0014946	0.210606	0	0	0	0	0.097219	0.691654	0	0.600912	0	0	0.0992288	0.138991	0	0.139789	0.14921	0	0	0	0	0
EVM0024701	0.0658026	0.0697988	0	0	0	0.0607509	0.123487	0.117398	0.0625837	0	0	0	0.173708	0.171952	0.262058	0.186479	0.267908	0.0934594	0.422439	0.162581	0.16052
add_RNAAddG001210	0.289584	0.10239	0.568473	0	0	0	0.271721	0.258322	0.183612	0	0	0	0.509634	1.7657	1.15326	0.273551	0.524004	0.685492	0	0.357742	0.353207
EVM0021251	32.3231	34.2403	32.531	51.8461	49.9392	50.6591	73.7581	74.0089	70.5341	36.8103	38.1106	36.1924	77.7231	78.6011	75.2191	99.4583	93.385	101.317	113.949	110.863	118.011
EVM0011304	109.251	110.062	106.405	29.8605	35.5438	29.4187	52.0488	51.366	49.4095	60.5705	55.7685	55.4547	68.013	66.5287	64.4165	58.5171	59.422	58.1886	38.9249	36.5242	38.0646
EVM0008855	277.198	292.833	282.771	22.1939	21.4008	22.9155	7.98674	9.92916	9.90696	9.20154	10.5131	10.4326	26.2407	21.2315	20.6232	23.1095	19.2257	24.0095	18.9534	19.7803	18.2953
EVM0009787	3.52437	3.6651	4.27324	13.3184	14.799	15.2482	6.0952	6.84259	6.57248	8.72327	7.3859	9.83295	3.37488	4.42427	4.31163	4.79803	5.81466	5.3001	6.12224	8.19555	6.23732
EVM0020175	20.3915	19.9275	17.3278	5.16573	5.65706	5.31661	4.872	11.032	8.57466	7.12424	4.95945	7.56154	4.36123	4.44051	3.88498	4.34745	4.22796	2.68167	4.36363	4.95656	4.77858
EVM0013239	0	0	0	0	0	0	0.0398682	0.0189511	0.0404107	0	0	0	0	0	0	0.0602052	0.0288316	0	0	0	0
EVM0014304	6.52672	6.3497	6.19004	2.22979	2.71407	2.77254	3.2687	3.8576	3.12276	4.56001	3.84435	3.62222	5.25867	5.15321	4.09289	5.8155	4.04841	5.11834	3.49596	4.94656	4.54198
EVM0004378	6.00048	7.3441	9.01574	7.3759	7.07347	6.13642	11.4339	12.3112	12.2041	7.55763	6.56376	6.35027	14.8655	15.4389	15.441	11.7726	10.7744	9.50584	30.5804	29.7653	27.4175
EVM0024698	0.830395	0.775126	0.684651	4.14975	3.62187	3.80256	1.24668	0.948159	1.20046	2.12683	1.71487	1.75279	0.745314	0.824581	0.749594	0.89424	0.721251	1.03788	0.426477	0.574472	0.567189
EVM0022165	15.5213	17.4597	18.0605	3.45493	2.82813	3.23574	0.587253	1.61905	0.83334	4.17916	5.44199	4.836	1.23912	1.55369	1.24623	0.354725	0.679497	0.533344	1.04465	0.463899	0.458018
EVM0009353	2.71447	3.88374	4.70908	0.42796	0.992207	0.174843	0.236933	0.225249	0	0.808415	0.857667	0.297429	0.499935	0.494883	0.335204	0.0894484	0.0856719	0.268979	0.405263	0.233956	0.307987
EVM0014685	355.656	362.361	359.193	164.381	158.159	164.853	71.1943	63.3243	59.8311	339.392	352.943	336.521	63.1675	67.1689	64.6115	66.2883	67.6456	65.1029	50.5712	51.8771	51.2989
EVM0016294	0	0	0	0	0	0	0	0.0900374	0	0	0	0	0	0	0	0	0	0	0	0	0
EVM0026927	0	0	0	0	0	0	0	0	0	0	0	0	0	0	0	0	0	0	0	0	0
EVM0001437	28.7351	30.3325	29.0247	69.4157	72.0974	74.8729	29.1841	30.9749	29.6695	78.302	89.938	78.083	17.2177	17.8928	19.9048	16.1155	16.7581	17.9337	27.5369	26.4374	27.5744
EVM0006977	24.2743	22.6813	22.4443	11.0913	12.0724	13.313	22.42	24.1653	24.3172	10.6497	11.0277	10.7558	21.5943	22.7681	21.3143	22.6429	22.9778	23.1286	13.2876	14.3828	12.3442
EVM0019381	0	0	0	0	0.162555	0.229159	0	0	0	0	0.374702	0	0.218415	0.108104	0	0	0.112287	0.117513	0.106232	0	0
EVM0011369	0	0	0	0	0	0	0	0	0	0	0	0	0	0	0	0	0	0	0	0	0
EVM0005883	0.275205	0	0	0.0444214	0	0	0.129114	0.245495	0	0	0.0415446	0	0.54487	0.359576	0.547999	1.88477	0.435737	0.651455	0.176676	0.226653	0.503503
EVM0025716	0	0	0	0.413301	2.09611	0.787986	0	0	0	6.2458	1.15961	3.2171	0	0	0	0	0	0	0	0	0
EVM0020772	0.870478	1.28242	1.47147	0.0468353	0.570075	0.625062	1.45206	1.85499	2.29971	1.59249	1.05125	1.32154	2.93622	3.85434	3.59506	2.19276	3.01901	2.88479	1.11766	1.01562	1.29767
EVM0007433	20.0497	18.6089	20.1136	4.64024	4.99636	4.01515	2.83578	3.81377	3.295	9.64195	11.6839	11.5998	13.0374	11.3647	12.3294	8.77353	7.30271	9.00363	4.82681	5.91901	5.48434
EVM0007693	0.525001	0.556884	0.515306	0.0847416	0.429778	0	7.71766	12.8789	9.32062	0.640307	0.237761	0	2.19436	2.05786	2.43927	1.85975	1.42499	2.48553	4.04447	4.53998	4.3757
EVM0024779	1.05851	0.858609	1.03897	0.964839	1.28449	0.402397	12.5613	13.3305	15.8708	0.341734	0.225589	0.234695	6.32825	8.37952	6.86053	8.99918	7.85872	8.04763	1.99865	1.69226	2.20242
EVM0017097	108.208	113.735	111.812	97.0762	105.573	106.67	86.2963	92.5756	88.5	75.6643	77.2846	72.8461	84.9546	81.2029	77.2771	79.138	74.7283	79.9538	62.9279	62.7957	63.8602
EVM0012259	56.382	58.3634	59.4914	21.8897	20.2599	22.1684	17.5419	17.868	16.1342	16.8972	17.0451	17.7565	21.5098	21.1309	19.5324	18.2908	22.0156	19.4579	20.9873	20.3459	21.3849
EVM0003371	77.8385	80.1668	77.1172	27.3184	25.106	27.5014	23.5927	21.5833	19.6814	21.9096	22.7079	23.5558	27.5386	28.5947	26.696	29.1497	31.1862	31.3253	28.7241	26.1952	28.829
EVM0000957	14.6796	15.8156	16.4076	5.17312	4.68098	5.74744	12.512	14.0204	13.0112	10.8968	10.0939	10.3203	14.8108	12.5523	12.2432	10.2368	9.17876	10.9705	6.90762	5.93412	5.62453
EVM0011110	32.4932	38.5042	35.8985	13.5962	13.5217	13.0453	25.3645	25.8704	26.2116	15.8779	18.7011	18.136	20.0841	18.7539	16.1434	28.1915	27.2354	28.4743	17.8688	17.8948	18.126
EVM0000041	4.42571	3.54695	5.21279	34.5753	34.3943	35.3208	0.369131	1.22825	0.374153	3.3286	4.54309	4.54112	0.649062	0.385502	0.130558	0.278713	0	0	0	0.364492	0
EVM0023673	0	0	0	0	0	0	0	0	0	0	0	0	0	0	0	0	0	0	0	0	0
EVM0010797	126.406	134.474	133.171	179.385	174.975	175.272	325.343	315.425	309.473	108.789	105.904	106.844	203.832	227.378	202.899	276.076	296.107	312.74	138.222	141.834	144.9
EVM0027739	7.42416	6.67061	7.67285	15.353	11.6261	13.5875	4.63048	5.29814	6.35489	8.10931	8.54402	9.17697	9.62632	9.75729	10.957	9.46772	8.71239	9.98628	6.44832	5.44899	6.01911
EVM0013738	0	0	0	0	0	0	0	0	0	0	0	0	0	0.162987	0	0	0	0.177173	0	0	0
EVM0012806	0	0	0	0	0	0	0	0	0	0	0	0	0	0	0	0	0	0	0	0	0
EVM0003112	9.56686	8.73187	11.028	2.15471	2.40414	2.36216	1.67009	1.1908	1.69281	2.59478	4.03034	3.14477	2.64295	2.10753	1.62441	2.75845	2.34004	2.60696	1.42831	1.64911	1.56036
EVM0025445	10.0895	12.2311	12.4182	12.253	10.9602	10.892	13.9752	15.3338	14.3685	6.10388	5.94733	6.3383	14.3741	14.9961	12.3307	8.85009	11.8815	9.70501	10.2128	11.1452	8.92035
EVM0021299	4.62769	4.15354	5.3808	32.4068	34.3398	30.4328	2.27132	2.22283	2.03138	45.2611	48.6865	46.0226	1.59752	1.76742	0.850601	1.31144	2.12567	2.02237	1.46259	1.05543	0.781535
EVM0012036	42.9057	44.8261	43.5861	34.53	34.472	32.3782	54.2589	51.0069	54.1845	39.5518	39.0696	40.1951	50.1958	49.7158	45.809	54.8605	56.5318	65.1416	38.3938	39.927	39.2175
EVM0000946	24.8558	23.1339	23.6493	16.5622	20.3362	21.0939	102.256	125.377	128.143	5.38322	4.07622	4.37125	65.2496	69.3848	80.33	48.0713	54.0286	47.7914	38.0477	33.7853	36.1437
EVM0017163	36.1742	40.7882	38.2461	34.9786	35.3678	37.6046	85.0977	89.1845	83.7632	33.2457	27.9663	32.3697	76.019	74.581	68.3638	94.6039	90.3005	103.404	46.2267	46.4479	44.9557
EVM0009243	10.8918	10.4984	12.0386	15.5016	14.142	16.5699	41.6352	39.6665	39.7245	13.3417	16.2992	16.377	24.0021	23.0789	26.4659	32.0071	35.6686	25.4912	19.092	22.2306	19.2918
EVM0003465	14.2337	14.8078	15.6366	10.0206	10.3524	11.4478	19.8281	20.3154	21.1392	16.8257	16.3136	17.5912	14.2711	14.8779	15.8065	19.3928	18.2025	19.0498	14.0581	15.2506	14.7234
EVM0024898	0.718645	0.900886	1.44281	2.84723	2.95219	2.865	1.90034	3.72982	2.23688	4.24296	3.49127	2.6472	4.26847	4.60946	3.59917	4.99886	3.98984	4.45392	3.01978	3.51081	3.14756
EVM0003277	0	0.317567	0.220393	0.0724867	0.0735251	0.276401	0	0	0	0	0	0	0	0.195585	0.298074	0.106054	0.304728	0.106304	0.288298	0	0.365162
EVM0027670	3.25592	3.15333	2.77896	1.43954	2.92032	2.41784	47.1545	54.6158	52.9796	1.10066	0.833431	0.933771	34.0066	35.6975	36.9267	74.7185	83.2831	75.1964	34.0799	35.8506	34.7054
EVM0001970	20.3017	26.051	23.9001	16.2553	13.8937	14.1286	20.5201	20.6421	18.8156	15.8046	18.1424	16.3046	20.1503	20.6885	18.9226	24.9019	24.554	28.7819	20.8374	21.8631	22.158
EVM0017536	0.743695	0.690252	1.09494	0.72025	0.547926	0.429126	0	0.0829262	0	0.680275	1.09461	0.700796	1.22702	1.579	0.987251	0.658614	0.630807	0.660168	1.07423	0.229684	0.566931
EVM0014948	48.009	50.336	50.2083	0.537312	0.835682	1.43419	2.29055	1.58371	1.30157	1.31948	1.00503	0.836479	2.53861	2.41631	1.91489	2.14876	2.10823	2.04876	3.70419	3.19847	3.69928
EVM0026682	3.14468	3.62998	4.99305	10.2115	9.99438	8.36823	10.5878	8.25057	7.21323	8.12192	6.86945	7.14674	14.4054	13.7765	15.102	14.1539	11.1714	13.2678	13.4192	14.7395	11.8452
EVM0017178	34.417	41.583	38.1171	31.4604	29.3799	32.3695	1.64061	2.79105	2.80072	12.2898	9.58539	8.93172	3.76538	2.28449	2.1989	3.91182	3.12222	2.74474	2.71756	2.50104	2.35709
EVM0012594	1.10151	0.525782	0.864937	3.84043	3.67903	4.37288	0.31007	0.196519	0.157144	1.71288	1.04758	1.45316	1.74468	0.359802	1.53536	1.09255	0.597958	0.938685	0.848576	1.49685	1.4107
EVM0011426	0.228047	0.161264	0	1.98772	1.49348	2.59666	20.2568	16.5455	18.6527	5.4236	6.4032	5.08579	10.5351	12.8123	13.0174	16.2643	17.6409	15.6549	9.56489	12.208	10.9406
EVM0001356	9.3652	12.2324	10.0214	13.0536	16.2712	12.2743	15.1972	17.7895	17.2204	19.3839	19.7927	19.3457	12.7006	13.9158	12.7248	20.8158	16.2984	20.3954	16.3628	18.2843	14.7824
EVM0024699	0	0.0512289	0.0474041	5.98699	5.78809	7.13411	57.5524	63.3307	67.0628	31.0125	31.7583	33.5864	55.5869	47.7053	49.2384	67.0644	56.04	66.9483	61.5758	56.0834	65.3866
EVM0007719	101.27	103.01	101.752	36.6852	42.0568	39.0704	19.2758	22.6001	20.8451	4.73807	4.43629	4.28332	18.6968	19.3826	19.459	14.8788	16.7373	15.1141	13.8442	15.6273	12.6786
EVM0027494	8.9198	10.3485	12.093	13.5518	17.908	14.5657	7.63725	6.76333	6.62771	23.1006	22.8741	20.4353	4.41501	5.68152	8.06666	6.47746	6.27964	8.47224	6.01264	5.02752	5.37177
EVM0027833	0.868751	0.115189	1.06589	0.210341	0	0	0	0	0	0	0	0.10233	0	0	0	0.153873	0	0	0	0	0
EVM0027071	8.9626	8.06509	9.08895	8.51549	8.92957	9.05886	12.8737	12.8072	15.6748	10.6073	8.61807	9.16607	9.41903	10.7113	9.98061	10.1717	12.5093	9.47176	6.59914	5.92961	6.99424
EVM0004344	467.735	491.658	484.208	96.7663	110.681	110.709	1.55783	0.875141	1.43548	38.7258	46.4118	40.9607	1.59373	1.77483	2.40432	0.855449	1.94591	1.9293	2.71304	2.14423	2.57728
EVM0014035	6.5088	9.50326	7.81665	32.1854	31.2925	32.732	11.7835	15.6424	11.871	23.3247	21.8476	19.6267	10.2082	12.3061	9.55525	9.43967	9.97642	10.2233	7.96375	8.70294	9.43319
EVM0010799	0	0	0	0	0	0	0.0912983	0.130194	0	0	0	0	0	0	0	0.206805	0	0	0	0	0
EVM0023000	2.30668	2.61359	2.57283	0.456947	0.102998	0.0484	0.491909	0.233826	0.199441	0	0	0	0.830352	0.753465	0.62634	1.03997	0.569177	0.595669	0.67311	0.906692	0.511541
EVM0007240	0.391287	0.484225	0	4.35794	4.67663	6.62288	3.18198	5.29386	4.52778	1.7896	1.06323	2.51956	6.71405	5.02726	6.06003	9.33301	8.31944	9.54029	3.51677	2.98087	3.89759
EVM0021135	37.1161	39.1162	40.0738	28.9307	31.2859	26.5291	47.7462	56.4459	50.7302	24.8061	26.0811	23.6928	47.6468	48.7297	45.2184	44.9575	46.8779	45.5738	39.8154	34.9067	40.5246
EVM0023692	0	0.10887	0	0	0	0	5.68207	5.95121	5.56414	0	0	0	4.06417	4.55952	1.635	2.32692	2.22867	1.1662	6.45731	5.07179	4.38156
EVM0027328	91.9205	90.6181	95.1304	9.08915	6.20368	7.77378	5.84331	6.49406	5.58913	122.111	139.107	135.547	6.13582	6.30302	5.58888	1.49138	1.54745	1.9932	1.57663	0.975192	2.56754
EVM0010408	51.1784	57.3353	50.155	32.7855	34.5886	33.6127	0	0.213666	0	14.8987	15.4035	14.8967	0	0.104319	0.211978	0.226263	0	0.340196	0.102513	0	0
EVM0006692	225.61	214.166	218.953	156.515	170.371	147.26	72.3068	88.1212	89.5382	114.594	116.329	111.285	138.477	136.349	130.809	115.067	138.013	127.294	49.9876	56.2011	57.2249
EVM0006752	705.856	713.04	736.051	346.781	342.56	358.011	95.6494	94.1152	91.3048	336.612	327.202	325.944	158.253	166.799	153.629	114.533	116.94	117.912	91.3487	96.1883	92.1531
EVM0012312	286.225	308.413	291.332	290.458	316.266	294.327	191.055	214.522	199.234	395.407	384.662	380.233	161.668	176.611	170.321	154.09	156.582	156.892	85.1233	81.0181	75.6861
EVM0027561	0.450464	0	0.442146	0.174505	0.973526	0.499058	18.9359	30.5394	29.8186	0.659279	0.244806	0.169792	119.271	123.952	123.305	143.231	139.018	119.129	128.399	140.68	140.875
EVM0003805	0	0	0	0	0	0	0	0	0	0	0	0	0	0	0	0	0	0	0	0	0
EVM0002544	0.397143	0	0.487262	4.03854	2.73093	2.93324	0.372646	0.885674	1.13315	0.635733	0.719429	0.187117	0.131049	0	0	0.984784	0.538975	0.423047	0.509915	0.122655	0.363299
EVM0003749	35.9332	34.7476	34.6761	38.5098	42.0319	45.8303	57.3136	49.2723	51.0474	49.3264	47.7472	49.5321	54.4133	51.1637	49.5074	38.4188	35.8393	36.7916	28.795	28.8882	30.9193
EVM0014105	161.017	151.337	151.383	78.3044	76.0367	78.9467	61.4051	56.6329	65.905	51.9182	45.5755	51.5877	94.9546	92.1918	100.08	75.7795	67.4293	72.283	68.3714	65.9971	65.0202
EVM0020040	24.5933	20.2055	21.5058	3.81088	3.16266	2.55951	0.839139	0.55843	0.425278	16.6062	18.0634	13.652	0.590201	1.05163	2.49308	0.380156	0.84958	0.254035	0.918597	0.552396	0.436315
EVM0003491	166.205	169.974	177.443	8.43327	10.5066	9.6122	4.08533	3.20841	4.9511	3.80945	4.6294	6.60007	0.749578	0.989339	1.50777	0.402344	0.513809	0.672156	0	0	0.115445
EVM0001696	23.3473	24.5785	24.2693	21.2762	20.2556	19.4699	16.7331	18.8384	17.2398	16.3929	18.3043	17.8271	19.1635	16.5172	15.8471	15.128	15.2456	15.7469	13.821	13.914	12.8074
EVM0005456	11.3821	14.4606	13.4571	38.1307	32.4002	34.7014	58.8859	55.4052	53.807	42.7582	42.9482	44.2186	29.6372	32.8528	27.6439	39.3303	42.4092	39.5701	45.9019	45.6028	45.3718
EVM0014726	49.599	45.1201	52.6594	38.757	40.0113	45.5386	75.6652	70.0782	67.583	39.2099	38.7759	40.1347	45.3062	46.279	44.9123	43.2071	44.2805	42.6093	45.4075	46.8677	42.0001
EVM0017445	0	0	0	0	0	0	0.386039	0.229376	0.293469	0	0	0	4.48004	4.90512	3.14038	0.21861	0.348967	0.219126	2.24503	3.74835	2.06996
EVM0000583	15.8868	14.5863	14.9799	8.52533	7.67526	8.60794	6.98911	4.69293	5.39985	3.62109	3.01944	2.99408	7.0814	7.75847	7.67524	9.00434	8.41211	8.50774	10.0318	8.68694	9.72038
EVM0013621	5.17594	5.79194	4.91288	29.03	30.9545	32.3473	20.2806	18.8746	19.5287	0.832449	1.49402	1.12555	19.5945	17.39	19.9335	18.859	21.9224	19.5498	20.2292	19.815	19.8413
EVM0015324	35.3768	36.5827	30.0356	18.3947	17.6217	16.9201	0	0.0495411	0	30.074	27.6664	27.7365	0	0.0725628	0	0.0786928	0	0	0.142613	0	0.0677384
EVM0025232	0.943956	2.07959	0.997797	89.1694	86.3097	88.4226	50.8954	51.6242	52.6928	16.14	16.1791	12.7952	33.257	37.8544	36.2434	44.1389	39.9103	38.1584	29.8338	33.6385	30.6436
EVM0024261	0	0	0.0588075	0	0	0	0	0	0	0	0	0	0	0	0.0795353	0	0	0	0	0	0
EVM0006300	279.617	274.139	294.284	98.5373	104.156	100.947	14.9383	16.7969	18.1392	36.7395	35.7205	41.1984	23.6802	23.7577	27.7856	11.7945	10.9675	11.5928	25.4216	31.3482	30.9508
add_RNAAddG002773	174.028	180.469	185.822	145.657	136.956	121.913	15.1294	16.3673	13.6167	157.153	147.933	138.186	15.0444	17.2534	18.4522	7.87827	10.7526	9.0814	34.0878	36.0604	33.7383
EVM0010867	333.448	328.677	349.814	50.3142	59.0157	53.8851	28.553	26.4457	25.9592	17.4702	14.2006	20.952	19.0949	16.0154	21.475	13.5312	13.3467	12.7534	33.8553	35.8315	30.7704
EVM0002416	10.6644	11.5814	11.3647	4.18047	2.99319	4.12582	23.587	27.3163	23.5698	3.15876	3.67975	3.01477	41.8262	47.9724	45.1674	45.4049	45.969	43.9253	31.1019	32.2461	28.7403
EVM0009985	0.46097	0.300901	0.870111	2.78165	2.15967	2.78265	0.598895	0.442837	0.640769	0.42166	0.417526	0.300724	0.280819	0.602293	0.517791	0.803906	0.144368	0.503627	0.682922	0.438052	0.605498
EVM0006343	0	0.121709	0.225244	0	0	0	29.4997	20.9825	30.4467	0.104956	0	0	106.316	108.84	107.689	28.2893	34.258	32.4303	355.93	355.36	377.305
EVM0026708	10.3607	10.9899	13.0433	0	0	0	0.211339	0	0	0	0	0	0	0	0	0	0.305669	0	0.289188	0.556488	0
EVM0007396	0	0	0	0	0	0	1.16236	1.00458	1.17818	0	0	0	1.0405	1.02999	0.149497	0.957429	1.22268	0.479845	0.144594	0.556488	0.549433
EVM0006833	5.07345	7.25885	7.58546	9.14141	9.79393	11.6554	23.6918	22.2077	20.8721	11.1703	12.1295	10.0063	13.7824	11.7161	13.3916	12.6223	12.8099	10.7249	14.3916	13.4097	13.6714
EVM0020898	21.7808	24.1567	23.2059	5.16837	5.27289	5.81491	6.31751	5.9783	5.60672	7.152	6.71654	6.783	6.47053	5.39168	5.14849	5.36356	5.17922	5.99316	4.50159	4.10126	3.78436
EVM0015183	383.409	394.114	386.074	210.688	202.165	195.244	69.4571	68.1969	67.4119	75.2789	71.9429	79.9406	35.6016	35.8184	33.3897	39.0006	37.1294	33.1387	20.1841	22.146	21.5288
EVM0025418	8.87724	7.78517	7.95862	17.6686	14.4885	17.2304	8.0673	7.233	7.44579	5.49873	4.17858	3.88618	5.90473	9.68088	7.51608	11.093	11.0041	8.93504	5.11564	5.00839	4.09233
EVM0010447	23.2965	23.3001	22.4774	27.1677	25.5826	26.0815	7.96824	8.05506	6.99976	6.75806	6.40977	8.02887	14.1604	15.1639	14.6551	12.5142	10.1803	13.4282	8.17758	7.83314	9.6673
EVM0005884	9.94712	10.5747	8.54573	8.81822	8.22637	8.59034	8.95937	9.30805	9.01806	9.68654	11.859	10.438	7.45653	6.71543	7.26408	7.785	7.33605	8.52707	6.00184	5.96628	6.62022
EVM0020710	42.5074	43.916	45.9429	14.9916	18.0424	18.658	18.7323	19.6716	21.2072	110.186	112.332	108.068	5.67547	6.34045	5.78961	4.35195	4.50167	5.23467	1.34078	1.66946	1.49845
EVM0013078	0	0	0	9.96174	8.19279	8.02057	26.6721	27.2168	28.0926	54.1009	61.0615	54.2266	62.8379	59.4787	63.66	33.4827	33.6725	24.579	24.8074	24.4696	25.1766
add_RNAAddG002922	1.82789	0.894877	0.414032	0.680872	0.690626	0.129813	0	0	0	0.38585	0.636778	0	0	0	0.559965	0.597701	0.190822	0.399408	0	0.173702	0.171499
EVM0014628	0.881527	0.935062	0.752391	0.148476	0.263555	0.141539	0.0719262	0.0341896	0.182262	0.420706	0.173575	0.505629	0.303532	0.40062	0	0.434464	0.20806	0.163308	0.147632	0	0.140244
EVM0016219	22.1987	25.8105	24.6803	7.59313	6.40306	7.77378	10.5779	8.7941	10.5233	9.33594	10.463	9.02739	11.665	10.4864	9.79209	12.9171	13.0958	13.5735	7.32659	8.02362	8.26141
EVM0014513	15.2318	20.1733	19.4695	17.3353	18.7671	16.4857	8.80146	9.25023	8.83936	4.32943	6.74226	5.6764	13.5167	15.4602	13.0232	7.1333	6.94892	7.39459	5.41409	4.67765	4.98572
EVM0016944	23.108	27.2076	28.7145	15.2628	11.4863	13.2698	15.4814	19.5003	15.6041	15.6417	18.1674	15.9829	20.3134	16.8473	18.5281	20.1697	16.4957	21.9239	16.1403	15.5295	17.5311
EVM0003412	64.1257	67.4079	66.4664	62.9736	66.3325	61.2749	74.8518	76.5948	79.3465	90.9188	92.6411	88.4042	57.3016	56.7226	63.4192	52.4281	56.2194	61.9328	48.0835	45.234	47.5545
EVM0013226	61.4414	62.0856	65.8085	18.7909	16.8893	15.8232	34.7426	30.2408	28.1415	27.2628	28.3136	27.3234	24.756	20.4216	23.1811	17.2592	14.263	18.3716	8.85761	8.98848	9.66337
EVM0016450	0.847234	0.659037	0.609832	4.26673	3.55106	2.55516	0.953968	0.554232	0.376035	1.44664	1.38129	1.11771	1.04372	0.516589	0.899758	1.12046	0.61323	1.20333	0.290083	0.488435	0.275567
EVM0006250	1595.87	1648.92	1651.8	527.355	556.217	538.07	237.734	239.409	244.869	740.735	747.703	724.902	391.022	408.18	403.696	320.638	328.088	271.712	358.611	301.338	377.426
EVM0015940	9.12189	9.15565	10.205	5.79455	5.97391	5.6144	17.3025	19.1616	18.3775	5.56267	6.66306	3.51222	68.3567	73.1767	78.9054	42.3894	47.921	40.2605	27.5801	25.2035	27.2767
EVM0002238	319.585	327.955	323.127	154.216	156.683	162.903	38.7506	36.1975	35.6675	217.917	213.765	216.843	80.5121	83.6322	81.8433	26.9866	28.5119	23.7968	40.0838	44.55	40.1535
EVM0022806	38.6009	41.2678	40.2925	40.7022	37.9982	42.023	20.4009	21.4943	20.8003	26.5368	28.5388	28.1821	23.6681	23.0524	20.3185	29.9681	30.1152	33.859	18.6037	17.781	18.0633
EVM0002598	0	0	0	0	0	0	0	0	0	0	0	0	0	0	0	0	0	0	0	0	0
EVM0013421	1.16154	1.76777	1.48708	14.9175	14.7343	14.1273	6.53936	5.31588	8.16534	15.152	13.1738	14.0862	2.39969	3.16725	3.15092	9.15952	7.40205	7.45967	4.47411	3.30658	2.77188
EVM0010527	36.1297	37.9097	34.8238	23.4584	23.5867	23.9995	61.4371	60.2068	57.6315	19.0762	20.6426	21.9817	51.4455	53.1362	49.7543	73.1838	67.2681	78.3933	30.6405	29.8427	30.0398
EVM0005260	34.2205	33.9193	34.4318	193.488	199.261	191.675	5.1053	3.74659	4.22152	226.145	227.429	225.321	3.77976	3.74156	4.05489	8.72394	7.83744	6.84649	1.34816	1.12026	1.04784
EVM0014002	0	0	0	0	0	0	0	0.0594493	0	0	0	0.125599	0.263893	0.0870754	0	0.188863	0.180889	0.189309	0.256704	0.329319	0.40643
EVM0019374	0	0	0	8.70478	7.49805	6.9151	54.953	77.4419	69.541	62.1844	59.3779	66.3457	36.4381	32.8078	38.8253	49.1237	44.9199	48.4291	41.582	42.0353	41.6764
EVM0006260	20.8753	19.3752	23.2681	23.3012	18.7255	24.2134	30.8754	29.6685	32.1788	27.0244	27.3203	25.2974	30.2973	30.3379	29.4145	33.8408	34.933	31.0939	29.5855	30.105	28.8602
EVM0009201	39.8387	41.405	40.9977	43.1005	46.9837	42.4731	61.2289	61.5576	62.8269	41.346	45.7	44.109	58.3162	55.6953	60.0747	55.0061	59.4511	63.2845	54.3869	48.6856	56.1124
EVM0014032	47.8769	52.3301	46.9053	31.8525	34.4413	36.0749	31.4466	28.8878	31.5916	38.6802	37.4391	41.6404	40.2711	37.9603	37.3048	47.8668	43.3437	46.9239	48.8339	50.2186	49.183
EVM0004689	359.406	366.047	372.154	181.379	181.958	185.343	285.606	302.269	301.152	96.7702	93.2613	93.0134	198.456	183.837	186.877	163.582	155.828	175.959	97.326	93.9149	97.918
EVM0020960	5.73343	5.74105	3.37654	13.8595	13.2019	11.1794	1.72153	1.63663	1.78857	4.02778	4.69454	5.10015	1.63461	1.37837	1.33955	1.49482	1.74295	1.88922	1.4723	1.92655	1.51051
EVM0015844	17.748	18.2649	16.7391	51.6615	47.8887	49.3396	25.3985	31.1923	32.2194	31.1691	28.7381	30.2407	26.6104	28.2415	25.096	32.8284	34.0887	35.3938	68.6177	62.3872	72.7223
EVM0019288	0.109326	0	0	0	0	0	0	0	0	0	0	0	0	0	0	0	0	0	0	0	0
EVM0005220	12.6277	9.25874	10.8289	0.386199	0.82699	0.409064	1.33039	1.38336	1.22207	0.162118	0.361189	0.334016	0.701791	1.04205	1.23519	0.690605	0.721579	0.377583	0.682673	0.875785	1.72936
EVM0024569	2.0823	1.15458	1.62579	0.779161	1.62714	0.96122	3.55246	2.82847	3.64581	0.173157	0.428648	0.758116	1.62409	0.989339	1.068	1.74349	2.24792	3.0247	1.39755	1.69545	1.2699
EVM0019293	0	0	0	1.01325	0	0.482959	0.981702	0	0	0	0	0.492943	0	0	0.347218	0.741235	0	0	0	0	0
EVM0026402	24.345	23.2793	24.1898	27.0619	24.2687	22.9743	35.8404	37.7638	31.0813	23.0368	22.0506	26.896	32.2125	38.1547	28.895	31.3521	34.0159	32.9591	28.3323	30.001	28.6699
EVM0026652	24.6155	23.1835	24.446	30.6608	30.6007	30.8373	44.4227	47.7378	47.2371	23.0477	24.5975	22.306	49.1668	46.4879	51.9553	45.2707	41.487	42.2836	45.9628	44.8513	49.4195
EVM0008917	0.380079	0.241896	0.298448	0.0736193	0.149348	0	0.927248	1.28838	1.01216	0.8344	0.688516	1.14609	2.00668	1.88709	1.41275	1.83108	1.44429	0.86372	0.683207	0.939074	0.463584
EVM0018351	10.45	10.806	10.2284	16.2269	18.3232	17.2474	27.2525	26.4294	23.9032	42.481	44.206	42.3596	13.2537	14.2259	12.8261	11.9533	12.6371	11.6913	7.57071	6.63512	6.58661
EVM0016244	0	0	0	0	0	0	5.74841	2.00917	2.3992	0	0	0	8.20511	9.41704	7.29545	3.82972	3.17896	3.96672	17.5826	19.5884	17.9115
EVM0001024	7.86504	8.93521	8.00492	6.03741	6.62874	6.51862	13.2293	12.5769	11.773	6.51987	6.19285	7.32713	19.4647	17.6624	15.3942	17.888	19.2858	19.8026	13.7131	14.1879	11.6098
EVM0000805	26.3851	29.8533	32.944	23.4814	31.4769	26.5102	22.1257	26.2933	24.6423	25.9615	25.2333	22.5336	29.8061	30.8094	29.9142	29.505	34.9048	28.4943	16.1757	19.6159	18.8454
EVM0017292	0.290737	0.264338	0.40767	1.12629	1.06082	1.11202	0.233832	0.259351	0.434524	6.49664	8.42678	8.14072	0.109642	0.379871	0	0.235407	0.225468	0.235962	0.159983	0.102619	0.151978
EVM0002275	0	0	0.0966634	0	0	0	0	0	0	0	0	0	0	0	0	0	0.133653	0	0	0.121661	0.120119
EVM0007410	177.996	176.987	184.568	122.442	115.593	117.91	70.6531	75.7925	75.2264	92.8212	91.3994	95.9464	65.1253	73.5304	69.7909	70.1357	73.0529	70.7025	66.7767	63.5129	65.0047
EVM0021539	4.81073	4.74961	4.10442	12.687	11.5237	11.7868	6.63209	5.90891	5.13853	40.0106	43.741	35.8474	10.1596	13.1997	11.6917	15.7306	15.0664	13.2449	11.8784	11.9775	11.6902
EVM0010089	28.158	26.4938	25.0939	18.3932	18.3326	17.4251	23.9448	24.1933	22.164	23.6445	26.55	25.6233	17.2923	18.2875	15.5461	19.6989	19.6347	24.3303	14.8548	16.0683	17.3878
EVM0020263	0	0	0	0.101544	0.205997	0.1936	20.365	31.7067	27.4231	1.1509	1.70942	1.58082	25.4641	26.3028	27.9765	32.6847	29.3126	28.741	29.4822	32.1228	30.9483
EVM0013938	30.7554	29.1153	30.8637	39.3941	35.8435	38.5714	97.8233	96.0722	96.3235	78.4991	77.38	80.9709	71.695	73.167	70.3873	106.331	113.773	100.633	83.754	87.3594	78.5544
EVM0018160	76.2463	72.4974	74.5993	43.8809	49.2955	52.144	46.9553	46.9059	45.7407	37.9439	38.5805	37.1209	36.3328	35.7383	34.093	41.3215	45.4332	45.0766	24.4407	28.9326	28.0565
EVM0027791	19.6759	21.223	18.5384	42.0509	37.1484	37.8637	19.8254	20.8473	20.6874	43.59	40.23	38.4508	22.2995	21.2064	20.9398	19.7041	19.3792	20.2223	16.842	17.8456	17.0118
EVM0016552	12.392	11.392	13.2984	18.3487	20.9921	21.1525	28.2163	28.4462	29.9098	15.5167	17.4847	17.0746	16.3927	16.6229	15.2805	16.7395	19.3215	12.4376	12.269	12.5191	13.3008
EVM0022891	5.58612	5.27896	5.68235	15.0005	16.8118	18.5193	23.6823	20.4306	23.28	9.47627	10.1653	9.57071	9.85328	8.89114	10.5166	16.694	16.2649	15.6515	2.21691	2.25848	2.35373
EVM0014487	21.6652	22.2716	21.8339	15.9741	18.5239	15.0632	27.8998	26.8421	28.6186	19.6545	19.9463	17.853	15.8279	14.6778	14.4985	22.4238	23.8971	23.0466	3.20527	4.46074	4.62168
EVM0001404	8.59204	8.26321	8.2085	4.16059	4.72661	5.34117	2.79485	2.81031	3.65005	2.98655	3.78738	2.21302	2.64618	1.79619	2.88949	2.19142	2.954	2.11523	0.514818	0.424573	0.419191
EVM0020894	12.3256	18.366	13.9223	1.51581	1.53752	1.71593	0.458939	0.698092	0.0930367	2.6844	2.03786	2.2123	0.258233	0.255623	0.129858	0.831654	0.398271	1.25043	0.125599	0.241692	0
EVM0021410	95.1731	101.883	101.044	63.03	66.4879	66.7306	46.2261	45.6462	42.857	77.8727	77.931	72.2423	45.7055	45.6388	43.0373	49.7514	45.2704	52.7467	41.6646	39.8264	42.0511
EVM0002612	29.9046	31.9267	27.942	13.014	10.8732	11.4021	9.98499	10.8437	11.3028	13.8549	12.3119	13.1383	13.1743	12.7367	15.2091	12.8771	12.4389	11.6388	10.8706	9.59564	8.85819
EVM0007342	0.0709185	0.0752253	0.208827	0.892875	0.348333	0.982111	0.931615	0.885674	1.82113	0.84332	0.899286	0.868758	0.842456	1.20459	1.03558	1.00488	1.34744	0.805803	2.27641	1.57699	1.1245
EVM0005764	69.4864	73.7498	70.0967	106.608	100.717	99.1267	59.0384	61.1429	60.0758	147.132	152.79	139.581	80.6646	78.6161	81.8362	80.3142	82.1593	92.2208	87.3205	87.1089	81.9997
EVM0008240	0.316366	0.671158	0.25877	0	0	0.0973595	36.8096	24.4114	26.3279	0	0	0	97.2952	93.8319	101.004	60.592	65.619	66.2019	217.046	228.309	216.925
EVM0025030	22.8797	19.8655	23.0911	20.3714	22.7477	23.0822	0.779094	0.946417	1.18454	2.48949	2.38152	2.99926	7.79334	8.19675	6.42969	3.00664	3.69353	2.55513	0.592269	1.08272	0.73142
EVM0026453	3.83836	4.07146	4.7207	8.1513	7.22321	7.34355	7.55033	9.24064	8.88459	2.5804	2.76453	3.35548	5.43254	5.98188	6.56877	5.63536	6.5899	5.64866	5.9377	6.68421	6.48666
EVM0017312	15.669	19.1432	17.3751	12.6118	10.2867	11.456	18.4096	17.5189	16.7448	18.2625	19.421	21.1989	13.4672	12.1534	10.8204	13.3703	11.7126	12.8026	10.2931	10.8276	11.3687
EVM0008499	0.221137	0	0	0.321248	1.08617	0.30624	0	0.295896	0	0	0.600887	0.20838	0	0.288932	0.146779	0	0	0	0.28393	0	0.134861
EVM0027188	2.14193	1.00391	1.56456	4.19705	4.89331	5.38063	0.607617	1.19974	0.568508	1.45806	0.496295	0.797962	0.723228	1.36676	1.52089	0.988145	0.878824	1.34422	0.319785	0.430756	0.546808
EVM0000615	493.977	499.152	494.859	241.087	220.494	211.385	181.299	206.438	216.252	53.3079	52.7389	53.1787	106.73	109.8	115.569	109.57	112.45	108.738	75.6808	78.6371	75.7038
EVM0006901	73.8999	76.9397	77.3768	57.9215	61.6932	59.3222	73.102	74.29	76.6098	74.4061	77.3864	69.1806	53.363	55.7009	51.0386	62.1537	64.3111	59.7359	46.7636	47.2246	45.3367
EVM0019487	15.0922	14.2195	15.2492	19.6031	20.4944	17.4579	88.0495	94.7946	104.361	48.0744	44.065	44.5052	60.8157	70.6407	68.3539	88.9361	91.3258	87.759	32.0302	32.2438	36.2746
EVM0008340	6.38887	4.8191	5.85284	11.4124	12.064	10.6827	1.86504	2.65961	2.16048	0.454537	1.86462	0.869603	4.68487	6.77079	7.16189	8.44922	9.3449	6.65434	5.2864	4.29708	5.3682
EVM0016898	20.1598	19.7935	16.5169	11.537	13.5027	11.3057	17.6656	14.1935	20.3621	1.06681	1.28271	0.235498	20.8915	25.143	18.2468	19.8306	20.0108	19.2858	17.0066	15.8485	14.2251
EVM0011643	1718.72	1694.18	1787.28	602.962	607.817	616.847	188.413	173.76	198.48	1075.94	1045.82	1024.23	382.68	442.133	460.058	256.576	261.166	263.318	351.032	375.455	357.407
EVM0019944	0	0	0	0.757227	0.682733	1.20309	1.22274	0.929958	0.991505	0.2384	0.0786875	0.0818638	0.802674	0.227018	0.461305	0.61549	0	0.370166	0.223088	0.321968	0.211924
EVM0010922	79.3742	82.2218	81.7452	54.1278	58.5882	58.0017	50.5789	52.4151	53.0059	62.1961	61.5863	62.3791	39.3189	38.7568	40.4234	40.9143	37.7323	41.5033	28.4531	28.6614	31.1433
EVM0020872	7.61007	4.39648	5.33539	0.921269	0.934467	0.439115	2.86901	3.15181	3.29578	13.4871	10.8932	10.7566	2.06274	2.66334	4.05896	4.52506	3.31967	2.21962	0.959652	1.76273	1.07738
EVM0012747	152.146	155.415	155.816	59.536	55.6946	61.4655	27.2451	27.9968	27.8854	30.2273	33.7457	33.6196	31.4299	30.0541	30.4277	32.9373	35.2839	33.7052	32.0296	30.2171	28.5992
EVM0028055	16.5191	15.4656	18.1173	16.6845	14.8722	16.0084	9.37708	10.4115	10.2849	10.3351	12.0239	8.18721	11.025	11.3033	10.5438	10.8845	10.8298	13.1346	9.62344	10.1806	9.59669
EVM0016734	22.3919	28.5363	27.9869	38.2235	28.0101	35.3967	11.7902	16.9568	14.2488	19.5983	17.947	17.457	12.7577	11.5764	11.334	8.90219	10.9312	7.5504	5.37775	5.37324	7.85944
EVM0016243	53.3447	55.3236	56.8899	52.9675	47.1686	47.3475	17.4716	19.7023	15.9949	43.1061	48.4249	44.9477	12.3931	14.7007	13.595	11.1149	12.0704	10.6347	8.29131	9.29897	8.3113
EVM0002694	2.0601	1.2607	1.86652	0.153473	0	0	0.817818	0.494766	0.904304	0	0	0	2.19624	1.34584	1.68294	3.03134	2.3657	2.36327	0.508669	0.587303	0.483215
EVM0010786	0.73795	0.695792	0.0804804	0	0	0	0	0	0	0	0	0	0	0	0	0	0	0	0	0	0
EVM0016785	0.256503	0.544161	0.7553	0	0	0	0.240681	0.800842	0	0.469258	0	0	0.169281	0.670282	0.340506	0.363453	0.348108	0	0	0	0
EVM0010306	63.5246	63.3329	64.3174	20.1234	18.4443	21.0901	0.411077	0.334976	0.119049	9.50329	11.5075	10.9105	1.98259	1.14482	1.08007	0.886813	1.52887	0.533344	0.482145	0.154633	0.305345
EVM0012449	0	0	0	0	0	0	0.285307	0	0	0	0	0	0.401337	0	0	0.430843	0	0	0.390404	0	0
EVM0024696	3.33798	2.38081	3.05039	16.5539	19.1655	18.3841	5.83215	5.0825	3.941	1.05287	0.834038	1.13886	5.69721	4.13574	4.20195	3.58809	2.96798	4.33222	1.33008	1.06646	1.05294
EVM0026756	20.8272	25.3498	23.7398	12.9203	14.5825	14.3547	16.8408	15.04	17.0699	24.3772	22.5734	24.2081	22.4228	18.5595	20.9377	23.0287	22.5774	24.3099	26.8644	26.0849	27.3151
EVM0023458	4.83452	4.98952	4.32843	17.3364	19.7027	15.0186	3.27963	2.82651	2.9825	36.0353	36.8951	37.2762	5.82064	4.9509	6.2877	4.07315	4.69915	4.82508	3.22948	3.18797	3.38661
EVM0005667	32.9289	32.5129	35.8604	0	0	0.175222	0.0890425	0.931167	0.45127	0.260411	0.601668	1.43075	0.125255	0.371967	0.251948	0.40339	0.515145	0.539123	0.609213	0.586158	0.578727
EVM0000129	7.5337	8.37998	6.5552	9.42589	9.88096	7.55688	3.51539	3.85061	4.76387	5.066	4.05733	4.83508	7.41756	6.49129	6.97363	4.26996	3.92389	5.14762	16.3656	13.2309	12.1691
EVM0011275	18.7822	17.2133	17.0097	6.16037	4.72337	5.59513	6.57949	7.77411	9.09844	2.47399	1.95072	2.07665	5.42094	5.95513	5.78451	7.23887	7.61298	6.47346	7.52405	7.54868	8.06389
EVM0019767	13.021	11.5351	11.5634	16.3521	17.3361	16.1166	33.6551	33.0591	34.7027	28.2278	30.1111	26.2927	38.9061	40.0086	39.6993	39.8741	40.7798	41.9328	31.7835	28.5184	30.9493
EVM0024499	14.4811	11.7362	13.4951	6.89411	7.35251	6.83492	17.4047	17.7801	17.4481	27.4598	26.7485	32.2363	30.8721	36.5658	36.0712	46.1679	44.6052	55.7518	34.4704	34.7237	36.665
EVM0009976	4.03997	5.42445	5.06965	13.2731	10.5998	12.7475	4.36658	2.37214	4.52326	1.63722	2.08436	1.97574	5.39991	5.47898	6.10978	9.05767	7.98123	7.26324	5.51545	4.86449	6.86118
EVM0005492	3.94251	4.87893	4.93198	0	0.0379698	0	1.99473	2.13772	2.35272	0.141424	0.245065	0.327802	1.58154	2.47459	2.30897	1.53351	1.73104	1.81162	4.81388	3.91546	5.04443
EVM0008834	6.88878	7.84299	9.37605	7.91697	8.52664	8.0559	4.17996	4.17866	4.67361	34.7413	31.1977	40.9391	3.69765	3.30026	2.92634	3.90443	4.2382	4.43547	1.59208	2.26938	2.68873
EVM0025815	7.00052	10.4409	8.07892	23.0514	24.0485	23.8547	19.8255	24.2222	24.4533	18.2404	18.4074	19.6701	16.3521	16.8521	13.7426	18.8769	16.8708	20.7895	30.3425	31.2908	33.3781
EVM0019045	3.09709	4.03802	2.91323	9.2483	9.44417	13.0457	4.66178	5.69815	4.47974	1.59355	2.51299	1.58082	7.66479	10.7909	9.67883	10.5139	11.6462	11.4552	5.96479	6.37673	7.00418
EVM0000008	0.0565698	0	0	23.5034	22.2841	24.5989	23.8862	26.0388	22.5433	64.7857	61.5373	57.1447	27.1789	29.3434	34.0185	20.1194	23.5692	24.1038	17.5046	20.9654	16.2147
EVM0014575	0	0.0889734	0	0.081235	0.164798	0	0	0.0748242	0.0797763	0.537085	0.303897	0.553286	0.110714	0	0.111349	0.237707	0.796847	0.119134	0.107698	0.621732	0
EVM0017856	41.2451	47.9095	46.1105	32.1756	33.9271	32.1427	60.9278	63.1438	59.8257	30.7176	29.1723	30.2936	71.3604	74.4106	70.634	94.8842	96.9836	108.085	63.1802	59.9286	61.1355
EVM0003354	2.8154	3.34474	3.20556	1.14519	1.60411	0.779778	3.64559	2.76261	3.42742	0.206025	0.663015	0.636718	8.62131	6.03279	9.2688	5.34565	3.9737	4.15865	3.39796	3.06068	2.47245
EVM0026250	122.489	123.164	121.84	65.6573	71.638	70.7299	58.7518	49.3671	47.8494	56.2266	56.7581	55.6227	42.802	46.9904	47.5443	53.1481	51.9182	48.1797	92.034	99.5662	89.8588
EVM0022616	147.773	147.932	142.36	7.01033	10.2711	8.2669	8.4523	7.4137	6.22149	11.9182	12.7727	12.5809	10.7574	10.9989	11.7445	7.14168	7.6406	6.5493	4.88794	4.96791	6.67071
EVM0015936	0.207906	0.220532	0.612202	0.906083	1.02118	0.863754	11.9	13.446	13.8415	0.760706	0.282468	0.195913	12.3488	12.3599	15.4557	2.65134	3.95018	2.95289	29.0968	26.9683	28.1479
EVM0015312	74.1	75.8504	75.8523	83.0852	78.2695	85.2997	85.4086	91.7118	96.6186	62.3227	62.3319	62.313	51.7757	55.2147	51.9431	60.7801	68.6354	63.4939	52.1236	51.9638	54.1089
EVM0009980	4.28845	5.61029	5.61235	9.06793	11.1638	9.10622	8.58436	7.33218	6.66183	74.2706	71.406	76.7803	10.9434	11.8601	10.437	7.49439	6.69298	7.41057	6.24034	6.09248	6.79984
EVM0026355	13.4379	14.3529	12.4112	8.58578	9.07546	10.1232	11.8647	12.9861	15.1325	6.44473	5.28273	6.19945	11.2703	11.0954	10.8395	9.18985	9.94167	10.3381	12.2812	12.1047	12.065
EVM0006776	73.3881	71.8802	71.0039	14.861	15.2612	15.6333	58.1594	54.6679	51.6688	28.4502	28.7756	26.4943	30.6113	32.3775	29.1845	37.2735	34.4494	36.5041	14.1545	12.6376	15.1899
EVM0009040	21.4671	18.8137	18.8866	16.9238	17.6163	15.4686	9.64159	10.8592	12.8851	12.4524	12.3896	15.6033	5.0968	5.21632	6.51619	5.65699	5.86226	5.57739	5.04199	5.25544	4.31071
EVM0007462	5.57834	7.05901	6.14774	12.4794	15.2219	14.3359	16.4986	15.6559	14.0548	24.1704	23.3129	22.9014	19.0317	21.0984	22.4321	18.1659	19.9667	17.4675	11.8116	11.3243	10.0666
EVM0027331	81.1066	85.5622	88.588	62.4712	56.1206	55.8954	25.1885	25.0159	24.1927	48.9674	52.4767	48.0868	38.7347	38.6498	36.7429	37.7788	34.8043	37.7939	34.4671	31.4241	31.28
EVM0017026	25.2303	34.3824	32.6752	47.4274	53.0122	51.2777	17.1801	16.3329	16.3307	73.323	76.5716	73.471	11.1006	11.3318	10.0014	10.4271	10.1058	10.2029	9.44843	8.22507	7.80024
EVM0002796	13.6638	16.063	14.1376	10.1566	9.57536	12.6148	21.1097	19.8746	20.0725	10.6676	9.93236	10.0052	19.4135	19.1036	18.0808	15.9081	18.3664	16.8109	13.074	11.9341	13.5343
EVM0020492	30.8756	35.2571	33.3205	1.83075	2.20516	1.81794	0.886869	0.843135	0.711658	0	0	0	1.24754	0.97766	1.67294	1.22766	0.748254	0.615278	0.60678	0.583817	0.72052
EVM0004974	0.784678	0.832332	1.2323	0.0759941	0.231248	0	0.368138	0.139994	0.0746294	0.0717763	0	0.0739415	0.103571	0.512621	0.104166	0.111185	0	0	0.302248	0.678557	0.191415
EVM0009307	0	0	0.227389	0.336545	0.227578	0	0	0	0.220334	0.847644	0	0.327455	1.07023	1.21076	0.615073	1.47718	0.786006	1.15163	1.33853	0.429291	0.706414
EVM0000487	0.836733	0.633963	1.29059	3.82024	3.17043	3.53142	9.14104	7.46403	8.1854	17.8771	19.5965	18.9232	8.28312	7.73088	7.93399	9.40021	8.27334	7.13047	8.28769	7.38338	8.45614
EVM0019031	23.4789	25.2975	26.3673	40.7659	42.181	44.7199	27.588	32.1711	32.9424	23.6534	22.7989	25.7622	31.3392	30.8843	36.6436	28.9976	28.6345	34.3986	28.9917	33.1861	29.0244
EVM0006981	0	0	0	0.537858	0.43645	0.102546	1.35488	0.594493	0.633839	2.43843	2.21331	0.732662	1.17286	0.580503	0.589796	0.314771	0.452222	0.788786	0.142613	0.274433	0.81286
EVM0021563	7.75541	5.46968	7.73367	12.3451	13.9808	14.0154	2.39987	2.61271	1.3732	1.16976	1.27039	0.816324	1.25233	0.700689	0.82143	1.2275	1.4556	1.28899	0.953389	0.713463	0.503155
EVM0014461	5.15297	3.7779	4.0165	0	0.148883	0	0	0	0	0	0	0	0	0.099011	0	0	0	0	0	0	0
EVM0022172	51.5203	55.8227	52.5521	44.7248	42.1994	43.346	263.017	266.01	261.883	278.801	279.466	269.124	170.038	176.239	181.232	319.136	323.942	273.566	102.838	106.91	103.09
EVM0022603	14.9526	15.2285	16.4844	0	0	0.0500169	0.559177	0.773239	0.515259	0.148668	0.147211	0	0.715077	0.424711	0.503428	0.690884	0.441144	0.461677	0.417358	0.7362	0.528631
EVM0022240	2124.5	2194.58	2174.03	593.731	599.006	580.317	236.988	239.78	233.556	776.961	797.943	785.58	142.339	125.257	141.533	120.069	103.271	106.88	149.883	158.272	161.716
EVM0009564	0	0.034449	0	0.0629056	0	0.119934	0.18284	0.289706	0.092664	0	0	0	0.0428664	0.0848665	0.129338	0.23009	0.0881502	0.0922532	0.0416987	0.0802413	0.079224
EVM0006744	47.9386	55.6294	55.666	39.5042	35.3443	37.7838	30.0407	30.2819	30.8361	39.8219	36.4242	40.3208	25.8465	23.4164	20.9129	28.8509	26.1155	30.3144	32.0153	29.8829	30.2479
EVM0013339	27.2412	26.4058	28.1344	18.8052	22.3585	21.407	1.33477	1.3324	1.82646	1.75663	1.86825	2.41283	2.53476	1.57983	2.83257	1.71329	1.83401	1.41428	1.00455	1.0544	0.34701
EVM0017196	2.94039	3.68604	1.57423	11.1319	10.5036	11.1054	0	0.119225	0.762696	0.855795	0.484231	1.00755	1.23488	1.04778	1.24197	0.568145	0.90693	0.759315	0.343212	0.165112	0
EVM0007321	0	0	0	0.116625	0	0	0	0	0	0.220304	0	0	0	0	0	0	0	0	0	0	0
EVM0010397	0	0	0	0.242868	0.246347	0.308696	0.784349	0.149134	0.477013	0.152926	0	0.236308	0	0.109218	0	0.355335	0.226888	0.356173	0.107328	0.103266	0.509783
EVM0008976	0.804133	0.959589	1.38125	3.79656	3.45598	2.784	2.07496	2.0623	1.91199	1.47112	1.00148	0.663029	0.928713	0.787996	0.533741	0.142427	0.682071	0	0.129059	0.74505	0.367802
EVM0023844	0.704846	0.498434	0.507343	0.318559	0.600084	0.780882	1.32274	0.838339	1.29604	0.214913	1.06403	0.575629	1.30247	2.27164	1.30995	2.19722	1.46674	1.60175	1.14632	1.10294	1.43284
EVM0016495	0.0731213	0.620496	0.0717711	0.495713	0.143661	0.0675078	0	0	0	0.0668858	0.06623	0.964647	0	0.191077	0.0970681	0.10361	0.0992352	0.103854	0.0938847	0.0903317	0
EVM0016846	3.9198	4.51171	3.76556	4.68471	5.98074	5.23583	15.4164	17.1112	16.1814	1.14432	0.67986	0.0785892	18.2734	17.7619	19.1534	18.5533	17.8832	15.7543	15.634	17.206	15.7672
EVM0007235	6.57143	7.50671	6.45009	6.23075	7.04229	6.78819	8.66701	8.77252	9.65906	7.06192	7.2008	7.14504	6.42948	6.78481	7.32045	8.3347	8.10754	8.41964	4.36623	7.15305	4.82034
EVM0012769	14.5568	13.4665	14.4754	114.031	107.413	117.737	9.9419	11.5804	12.6645	12.0058	12.9688	12.0981	12.7252	13.0955	13.4952	18.0565	15.9987	19.7938	18.8129	19.516	15.3101
EVM0007391	45.1513	42.1496	47.2611	61.8805	57.2841	58.682	74.8833	69.5557	82.6367	90.2981	86.7719	87.4484	42.9925	44.735	41.6912	51.5831	51.2142	48.6286	38.9334	43.0173	48.0604
EVM0018398	50.943	57.2092	53.2314	34.1786	27.4212	24.9427	29.4661	30.592	30.1515	28.3605	31.0622	30.719	25.1329	19.6687	23.4244	36.4451	33.5534	38.3718	20.2242	23.0304	24.076
EVM0014202	2.50325	3.05933	1.33534	0.632434	0.534578	0.301444	0.153185	0.582524	0.207026	2.19022	1.97159	1.99989	1.58021	1.13763	1.4448	1.00241	0.369264	0.309162	0.139742	0.134454	0.132749
add_RNAAddG004655	3.01966	4.62662	3.78721	0	0.164798	0	0	1.19719	0.319105	0	0	0	0	0.21919	0	0.237707	0.227671	0.238268	0.215395	0	0.61385
EVM0020243	0	0	0	0	0	0	0.167828	0	0.340222	0	0	0	0	0	0	0	0	0	0	0	0
EVM0008838	0	0	0	0.0947379	0	0	0.0917878	0	0	0	0	0	0	0	0	0	0.132757	0	0	0	0
EVM0022351	0	0	0	0	0	0.266296	0	0	0	0	0	0	0	0	0.510535	0.136235	0.130483	0	0	0	0
EVM0002897	23.7615	26.9009	27.8975	22.8796	21.2323	23.5404	25.8116	30.0009	30.1177	27.2525	25.5781	25.7494	31.8456	29.255	26.3264	29.9783	28.0304	32.71	34.3223	32.5718	32.772
EVM0000829	1.3078	1.13752	1.48903	3.44506	3.90553	3.47731	3.26416	3.26652	3.18419	0.78954	0.947635	0.542237	0.414283	0.410097	0.138887	0.259432	0.35497	0.371493	0.268665	0.226186	0.287123
EVM0002294	145.515	143.096	147.688	37.946	42.0713	39.439	389.141	360.679	362.347	11.4489	10.6466	14.6146	276.034	254.331	277.98	260.087	278.795	301.278	209.473	200.134	215.053
EVM0014190	39.6474	48.6006	45.0598	26.9649	23.4271	23.3933	33.4537	35.3939	33.3701	25.8773	27.1626	28.3433	25.5754	27.1865	24.7725	32.9046	27.3484	31.8391	25.6059	22.8324	24.6881
EVM0004486	1.87116	2.97719	3.0304	7.97353	8.54729	5.52802	132.383	123.684	126.62	3.25202	2.28799	1.23425	100.519	101.093	98.2401	164.913	171.791	171.947	30.6317	28.5478	28.4142
EVM0011877	0	0	0	3.97483	3.8351	2.58771	0.0939283	0.0892963	0.571237	0.2747	0	0.188657	0	0.130792	0.132886	0.425524	0.679264	0.284352	0	0.123664	0
EVM0011962	27.8536	34.9543	31.9649	19.1417	17.8958	20.2281	54.251	53.6776	51.8115	15.5379	15.959	14.2502	84.3446	89.4199	89.7777	87.7051	86.4841	89.0111	59.2435	59.6952	57.0081
EVM0020647	1484.76	1561.57	1541.28	237.152	253.355	240.124	44.186	44.0657	46.7448	126.772	135.415	128.069	58.3688	62.5871	58.704	19.5316	19.892	15.0597	75.3579	78.9015	68.62
EVM0009441	9.16279	5.32244	5.56746	14.3673	12.7515	14.4011	1.53528	1.26496	2.0749	2.79381	2.27241	4.21433	1.2958	0.712612	0.868825	1.54563	0.592148	0.774637	1.2605	0.943285	0.532187
EVM0000722	22.0368	22.0032	20.3604	21.7275	22.8206	21.8146	15.8698	16.8178	16.8427	18.3375	17.7071	18.0469	11.8185	11.8291	11.0279	9.93847	11.8817	12.7174	10.7301	12.1676	12.4988
EVM0015338	20.0144	20.3014	20.465	18.8825	15.6351	15.833	19.6013	20.4804	23.1603	21.0738	19.786	22.3469	25.6295	22.9271	20.9172	22.8342	23.5982	25.2617	18.0854	18.4333	20.7233
EVM0014223	51.5764	51.3061	56.5895	77.5825	74.7966	70.4122	29.7815	31.5508	32.3142	45.3249	42.6633	46.374	75.3185	74.7781	70.3723	46.7075	47.7713	49.3355	45.9543	44.4759	37.0653
EVM0005378	0	0	0	0	0	0	12.4588	12.792	14.4468	0	0	0	0.84123	1.94304	0.42303	3.91333	3.02732	5.88386	4.90988	4.8553	5.05287
add_RNAAddG004848	0.184281	0	0.361755	0.178471	0	0.170133	0	0	0	0	0	0	0	0	0	0	0	0	0	0	0
EVM0019775	0	0	0	3.26363	4.33775	2.68204	15.919	22.3901	24.8666	11.7985	12.8406	16.2059	22.6998	19.7375	22.2131	36.3884	38.6369	33.5035	8.20594	9.76158	9.4961
EVM0017455	0.354248	0.375761	0	2.40156	2.08797	1.74428	21.2734	35.1819	30.772	54.5465	55.616	55.8581	24.9374	18.5141	20.8483	28.444	24.3585	20.9641	15.9194	14.0041	13.2504
EVM0000025	35.6635	37.8643	35.2962	41.8173	38.8223	35.9991	2.93812	3.44009	3.13484	68.5007	71.8893	72.0889	2.04475	3.40219	2.23151	3.6429	3.4891	4.49415	2.49689	2.60599	2.81417
add_RNAAddG004925	393.476	425.347	393.156	371.362	394.64	388.176	508.089	521.697	539.819	49.2212	45.9344	44.3156	494.836	483.672	499.439	491.945	443.564	510.904	303.048	295.04	287.703
EVM0010352	22.4201	24.0614	25.6522	32.4847	35.6275	34.701	50.8603	49.5875	48.2075	17.0298	17.6592	17.9785	39.6018	38.0529	37.4074	51.8569	56.6478	53.7276	30.3668	31.3085	32.9223
EVM0016363	5.42544	5.43872	4.21339	1.27029	1.22992	0.550431	3.13278	3.40377	3.68574	0	0.0540012	0.112362	3.93467	3.50542	3.24496	5.40666	5.09748	6.94363	3.75094	4.49282	5.52665
EVM0005057	10.3009	8.55688	7.91801	25.6015	21.3354	21.8847	7.68582	6.86397	7.67236	40.1874	36.5335	38.5929	5.73338	7.78347	7.41382	9.67199	8.08463	10.2236	14.5007	13.1854	10.4448
EVM0027222	238.765	245.608	243.273	79.9012	80.9011	70.7278	55.0186	53.1378	53.7588	141.635	140.735	137.3	74.3472	77.1892	79.142	71.9502	71.5784	70.1671	52.5863	61.6376	61.1557
EVM0009026	25.9863	25.8862	24.9629	14.2115	14.182	12.8173	22.8988	25.1215	28.4393	10.1304	9.67281	10.2123	53.0417	52.6608	50.2484	93.3143	84.2751	101.287	38.9007	39.9694	35.748
EVM0012221	3.63413	3.32313	3.32103	0.647276	0.57448	0.192824	0.47034	0.372622	0.158913	9.62879	7.86965	9.36818	0.11027	0	0	0.236754	0	0.0593282	0.160899	0.0516034	0.101898
EVM0010313	0.290159	1.07723	0.996805	1.1943	0.712594	1.33942	0.204196	0.582379	0.344957	2.91957	4.0079	4.30639	0.670225	0.947789	0.674073	0.102786	0.098446	0.103028	0.186276	0.179227	0.0884773
EVM0013374	48.0923	44.8868	51.8664	104.809	93.5854	95.0794	28.21	33.7522	35.9347	6.61595	5.86664	6.81552	32.9856	36.0374	37.8324	56.596	49.7381	53.5864	31.0475	31.7396	30.8105
EVM0017291	0	0	0	0	0	0	0	0	0	0	0	0	0	0	0	0	0	0	0	0	0
EVM0004230	0.0856515	0	0.0840699	0.0829513	0.168279	0.316304	1.44663	1.29888	1.22193	0	0	0	3.50463	3.2454	3.29735	0.84955	0.929922	1.09486	12.317	11.216	10.5514
EVM0019665	2852.37	2870.3	2885.86	810.298	803.136	792.623	443.392	426.747	430.682	967.033	975.338	964.512	341.218	349.285	337.093	273.592	263.189	286.204	334.684	339.09	357.151
EVM0011996	23.2601	25.3861	26.4615	18.5643	15.4991	16.6103	24.4023	25.3988	24.9742	15.8164	17.4382	16.6104	16.5343	18.015	15.0668	19.7354	21.5644	22.3294	15.94	18.0025	17.6717
EVM0021408	69.7237	68.21	64.4175	76.4474	77.5426	88.7742	78.4736	78.7395	85.5541	20.5433	19.1966	21.6169	49.1936	59.8676	60.1865	34.2115	42.4093	37.1143	12.6012	11.3061	12.3378
EVM0026843	0	0	0	0	0	0	0	0	0	0	0	0	0	0	0	0	0	0	0	0	0
EVM0023584	1.32281	1.05236	0.540994	17.0814	17.3262	19.5401	6.41295	6.88337	4.82273	0	0	0	10.3305	11.3783	11.8532	12.1834	12.7162	9.08081	7.78449	5.71956	7.39494
EVM0020949	17.1535	18.3089	17.9031	8.01738	7.69631	8.20793	9.01688	8.59952	7.82975	12.6953	13.2639	12.2131	7.08925	6.7577	6.92682	9.01979	8.74281	8.64988	7.87848	8.58222	6.84966
EVM0016433	29.1783	31.5706	28.8117	45.5873	42.6216	43.6196	44.881	42.4591	40.3752	55.2522	53.0687	52.015	59.8146	58.217	60.6238	63.1351	58.8031	64.5299	52.9297	55.8388	53.2765
EVM0024451	0	0	0	0	0	0	0	0	0	0	0	0	0	0	0	0	0	0	0	0	0.180911
EVM0018188	4.32171	4.58416	4.72669	2.87003	2.06206	2.50796	2.78066	3.30442	2.46618	1.46832	1.34208	2.09438	2.28171	2.74265	2.62265	2.97435	2.51362	4.73512	3.32933	5.18636	4.06636
EVM0021682	10.1176	12.7231	12.9415	5.40921	4.54227	5.19878	5.19782	6.41169	6.87958	4.27146	3.48318	3.7532	5.43844	5.92184	4.80116	6.48697	4.72195	5.65699	5.23151	7.01301	4.8022
EVM0022619	10.5289	11.218	12.1988	19.9851	22.2064	21.0215	12.9158	15.7304	12.8462	38.8886	41.0986	39.3546	17.828	18.1994	16.4362	20.9662	19.6673	21.0157	14.5122	14.7162	14.3008
EVM0025657	36.6325	37.1143	35.7664	2.71465	1.99394	2.58783	0.99763	0.775991	0.459638	19.7162	21.0111	11.8404	2.42397	1.76803	2.30958	1.23261	1.0494	0.96096	0.372306	1.07465	0.353675
EVM0024243	0	0	0	0	0	0.275366	1.77248	1.33032	1.60748	1.36414	0.450256	0.562116	1.70595	1.55882	1.84773	1.26788	0.674637	1.97691	3.44662	3.68465	3.15288
EVM0016827	15.1322	16.5376	13.8883	14.782	12.098	16.8734	14.1988	13.6739	12.2114	10.3663	12.0447	9.321	11.2403	11.5547	11.9136	9.18926	10.4015	7.07103	4.45775	4.45091	4.79398
EVM0025354	21.3077	19.9543	23.6199	17.7137	16.3208	17.3333	36.4214	33.5288	36.3856	14.4476	15.1157	15.8663	32.1069	38.2558	36.4946	39.9041	37.1072	40.8977	33.0498	29.6822	31.8957
EVM0011989	63.6329	62.3555	67.5618	47.4151	48.9168	48.9429	113.627	114.942	112.281	51.9988	52.3272	52.8614	92.2493	86.9989	80.0263	100.218	88.8699	105.962	108.238	98.698	104.434
EVM0011178	1.10568	0.92151	1.39534	0	0	0.0729143	40.3135	23.883	27.7171	0	0	0	29.9178	38.0771	37.7431	34.8032	36.6564	31.9689	108.096	112.494	105.192
EVM0005322	5.63029	6.61002	7.72612	5.66455	4.99392	4.08779	7.69368	7.55808	6.34266	9.75029	9.95176	8.91119	7.64795	6.85645	8.41751	7.82295	5.56386	7.68614	9.54515	8.03594	8.73414
EVM0004808	146.431	146.422	150.814	33.4728	35.5184	32.159	77.1388	76.1523	74.2975	204.411	208.428	205.106	82.107	77.1112	80.0628	76.678	72.9916	72.2022	59.2461	64.4361	63.2156
EVM0001359	1.44362	1.53129	0.779331	0.559244	0.921791	1.53271	2.09959	1.86727	2.67736	0.264103	0.196135	0.408104	2.57237	3.20654	2.20386	1.63644	2.6449	1.53778	6.85813	6.15274	4.93023
EVM0003815	0	0	0	0	0	0.15123	0	0	0.155792	0	0	0	0.216208	0	0.108725	0	0	0	0	0.202359	0.099897
EVM0019348	0.238481	0.337285	0.390128	17.1682	10.386	13.2837	37.3696	40.5616	33.493	19.9965	22.2485	20.0004	34.4153	35.0023	39.0451	32.3273	37.867	33.7585	78.387	91.4277	87.5538
EVM0004858	1.2719	1.01185	0.468154	47.1163	50.4464	42.1263	62.6557	60.275	66.6836	33.3033	30.8167	35.3566	89.186	97.4248	77.457	132.688	116.73	113.582	75.1208	74.0457	45.7646
EVM0015651	0.128704	0.13652	0.189491	0	0	0	9.66119	11.768	11.9348	0.0588642	0	0	4.67165	5.38117	5.46731	7.02115	8.47139	5.84953	13.0548	16.1382	13.1079
EVM0027286	48.0857	56.2143	52.1003	104.044	112.104	114.424	5.63995	4.83319	6.68288	314.865	309.477	312.636	8.26884	8.62774	7.41726	7.43729	11.1445	9.37868	6.95662	5.43835	5.16289
EVM0014116	24.2771	29.4847	29.2573	4.45194	3.95125	3.77977	0.87614	1.08922	0.683124	2.89083	1.82159	3.04572	1.99088	1.40769	2.00232	1.93371	2.72936	1.93827	1.84443	1.50843	1.13888
EVM0007397	35.0984	38.0133	38.5236	13.5559	11.919	10.5199	22.9676	22.2114	24.2166	72.0278	76.1953	72.3115	25.2987	25.5485	27.3115	21.0791	23.2438	22.0779	18.1975	17.5523	16.6864
EVM0013382	0	0	0	0.0516626	0	0	0.0500539	0.190342	0.152205	0	0	0	0.21123	0.0696985	0.424886	0.151173	0.434372	0	0.684919	0.593099	0.845838
EVM0014521	0	0	0	0	0	0	0	0	0	0	0	0	0	0	0	0	0	0	0	0	0
EVM0002099	0.159683	0.0338761	0.0940406	4.67039	4.45494	4.6586	2.93673	3.50413	4.6169	0.905607	0.983508	0.601887	1.47537	1.00146	0.763121	3.21294	3.33734	2.90301	2.62433	2.64338	2.92149
EVM0022581	55.1711	50.9675	55.9209	158.841	138.485	135.696	30.6743	22.6558	27.8682	103.052	102.663	102.481	37.7695	39.9103	42.1439	16.1699	18.3984	15.355	9.52943	9.11581	8.58162
EVM0004007	42.3653	44.357	50.276	31.7007	31.1458	30.0512	67.9383	72.0608	69.3836	13.9058	13.5007	13.4219	82.0098	90.8739	83.6625	124.652	123.262	136.455	74.5883	79.6612	77.2314
EVM0007629	0.0931399	0.0987963	0.22855	1.44326	1.1437	1.28984	0.961341	0.747764	0.974421	0.766775	1.26543	1.22874	2.58167	2.73812	2.59649	1.31975	1.01122	1.32286	2.51134	1.84099	2.15846
EVM0019195	1.90163	0.672372	0.855487	0.537157	0.700524	1.46304	1.70998	1.4843	2.41148	1.44955	0.574137	0.895968	1.88249	4.3481	1.68294	3.36815	3.54855	3.93879	3.45895	2.34921	2.89929
EVM0027037	4.87705	6.0993	4.52105	3.81945	4.2882	4.53043	3.87001	3.41061	4.12309	7.71063	7.85317	6.89358	4.25179	3.42213	3.31705	5.28956	4.65767	5.3448	4.40654	3.68191	3.04772
EVM0016840	2.654	2.77285	2.95755	5.29527	5.52795	4.9742	4.96186	4.50357	4.47899	1.55152	0.777193	1.07182	1.55399	1.38185	1.43046	2.14891	2.16651	2.06896	1.63976	1.82422	1.97147
EVM0007800	0	0.0899034	0	0.328337	0.16652	0.469497	0.477169	0.604851	0.0806102	0.155057	0.383842	1.51747	0	0	0.450053	0	0.115025	0	0	0	0
EVM0012571	18.6404	19.8106	20.5611	17.5988	19.4447	17.8751	17.4567	19.0402	21.1234	22.2287	20.6391	22.7293	11.0883	10.8821	11.8699	13.7427	13.9943	17.5646	10.5085	11.447	9.14709
EVM0023342	1.9885	1.82032	2.03199	4.51114	4.33493	4.95425	2.40259	2.77009	2.59072	1.39534	1.87511	2.10481	2.62464	2.56253	2.38659	2.43163	2.21807	2.97901	4.127	4.07177	4.4853
EVM0010756	0.255873	0.108565	0.0502297	0.148684	0.201085	0.283476	660.44	660.329	664.559	2.66821	0.0927034	0.337559	288.017	325.693	330.499	522.015	510.671	544.98	511.194	524.153	406.404
EVM0006141	80.5559	75.8636	82.601	7.56432	6.09301	5.30216	1.29331	0.956305	2.91313	3.36211	3.25979	2.66981	3.23428	2.8014	4.47267	1.30202	1.24705	1.84889	3.44112	2.93251	4.01611
EVM0027191	17.7487	19.06	14.3975	107.965	116.212	106.104	15.6905	13.2811	13.5323	496.648	501.013	477.42	11.1326	9.39101	10.4176	9.04121	10.7497	11.3542	4.80256	2.62752	3.39931
EVM0011344	377.739	382.486	394.666	107.422	105.305	104.084	94.3222	97.6456	97.9139	171.986	175.979	166.768	98.9371	101.267	107.023	91.3655	92.3391	90.0874	90.7884	90.6008	82.8901
EVM0017084	0	0	0	0	0	0	0.0815163	0.0774965	0	0	0.0786875	0.245591	0	0	0	0.123098	0.707405	0.123389	0	0.214645	0
EVM0001504	10.1098	10.8326	10.2253	117.393	108.942	102.054	106.322	106.664	109.135	213.071	224.276	223.029	162.025	187.477	185.982	147.977	156.216	138.268	71.0304	72.0828	70.7934
EVM0017440	19.6442	17.2558	15.3649	8.99223	11.4579	13.0353	22.9686	31.6929	27.66	4.63263	3.96168	5.64008	30.8915	24.664	28.8279	41.7524	42.3848	40.1071	40.198	38.8664	38.9352
EVM0003692	22.287	24.6342	24.9729	0	0.0968743	0	0.092532	0.087969	0.234478	0.180411	0.133981	0.0464632	0	0.064424	0	0	0	0.0700314	0.0633087	0	0
EVM0021485	12.2519	12.7114	13.3717	14.1464	13.5292	13.7883	14.0136	14.4128	13.8074	13.5249	13.6083	10.7587	10.5449	11.2174	10.6451	10.0952	11.1254	8.59486	8.72667	8.39642	9.30805
EVM0002896	12.1483	11.6609	12.5537	18.6836	15.7157	16.4285	16.5364	13.2407	15.2155	35.4106	35.2959	31.8434	16.4299	17.5493	17.4896	13.395	13.7003	14.9455	9.00721	8.13791	9.23473
EVM0012521	37.5056	31.9403	34.7094	17.5389	17.5796	20.5779	1.91043	3.05889	2.14025	2.64655	2.52355	3.23127	2.82881	3.92031	2.7028	2.27758	1.89057	2.89175	3.16451	4.36855	3.13685
EVM0008317	23.8496	21.0116	19.4429	35.6826	34.7149	35.9907	54.8682	56.474	54.1075	22.3231	16.5064	18.218	42.7744	39.1329	42.0734	43.5615	36.2382	40.6258	38.0485	37.4895	32.2788
EVM0012907	5.29874	5.2648	5.95799	23.9371	21.1503	21.4255	2.20274	1.73512	1.33963	14.4793	15.4005	14.0312	1.46075	1.88417	1.69173	1.7107	1.50194	1.57184	1.80849	1.98863	1.71799
EVM0000315	28.6143	32.1532	33.2682	19.554	18.0618	17.0238	23.6876	22.5431	20.8683	21.017	21.9164	20.6759	22.8326	22.4286	19.565	19.8684	20.0018	22.8169	20.6607	20.9276	20.6138
EVM0016473	25.8664	26.4337	27.1939	17.2169	17.2672	17.7413	48.2542	47.5151	51.6231	14.2134	15.2087	15.5966	34.8978	34.6497	34.6206	52.6831	52.7014	55.0219	41.7495	39.1653	41.8547
EVM0006319	40.4516	45.2496	41.5617	30.931	28.6748	26.1589	6.93191	7.75539	7.11191	18.6658	18.85	15.0265	6.83759	6.23879	6.15927	5.99989	5.19637	6.52589	16.8886	17.585	16.8676
EVM0005769	0.115833	0.368604	0.454778	0.336545	0	0.641646	0	0.206657	0.110167	0.423822	0	0.436607	0	0.151345	0	0	0	0	0	0	0.141283
EVM0018356	0	0	0	0	0	0	22.7295	15.0989	15.9054	0	0	0.0955077	14.0468	15.494	14.3965	15.3667	13.0673	12.38	36.3076	38.189	32.1418
EVM0019301	84.8452	88.4537	85.1471	80.2544	77.9573	79.6757	99.9611	100.359	100.469	61.6645	59.2004	56.4546	78.4855	77.5461	81.0669	88.8044	74.2649	87.4235	61.4901	60.5926	64.2407
EVM0025395	40.5145	42.6501	44.6357	28.0563	27.1947	27.5655	51.4056	52.6404	57.9009	41.3733	41.9385	42.1597	75.7471	75.9419	72.442	76.5863	74.1009	83.7261	59.1356	59.5837	64.0575
EVM0019113	50.1989	61.0852	56.3002	35.7799	37.8639	34.46	258.599	265.824	244.223	7.31624	6.20958	7.24981	140.158	123.812	135.704	72.2089	73.6056	83.6312	38.7307	33.9713	35.306
EVM0003001	18.8323	22.1848	23.0168	20.2992	21.2126	21.2734	7.05126	9.24766	10.0319	6.04578	4.55138	5.16168	13.3845	13.7816	10.036	15.2666	15.175	14.3382	15.0543	16.0505	13.9696
EVM0015817	571.084	616.741	602.593	26.5747	27.7613	24.6178	1.28308	1.05717	0.476864	20.847	24.5647	21.6906	3.42929	3.75196	4.41711	2.13134	1.05161	2.0069	3.10177	3.37855	2.22381
EVM0005994	0	0	0	1.14083	1.04146	0.815651	0	0	0	1.50852	2.45398	2.38654	0	0	0	0.0834563	0.159866	0	0	0	0
EVM0010789	0.414295	0.439455	0.0580921	0.229277	0.116281	0.218565	0	0.105591	0.11258	0.433103	0.375249	0.167313	0.781191	0.386649	0.785677	0.167725	0.48193	0.336241	1.36784	0.877383	1.66033
EVM0017263	5.70328	6.00201	6.83217	8.39395	7.67602	7.58721	4.97224	5.08758	5.59514	0.65725	0.976209	1.35415	7.11292	6.21959	6.25955	5.34511	8.53239	6.50581	10.3787	12.4825	13.584
EVM0009829	1.91652	4.45676	2.17053	1.35638	2.38956	2.0416	0.0691654	0.328773	0.280426	5.52895	6.81005	6.8071	1.07023	1.15573	1.56564	3.55119	3.10115	4.08304	1.51429	0.910617	1.88805
EVM0016651	16.4927	17.2308	17.6021	13.5191	17.2751	14.6303	16.5474	16.3518	17.6703	14.859	15.9282	15.9626	13.7039	15.3179	14.0464	12.9517	14.7645	17.2156	13.203	12.2124	10.7246
EVM0023200	112.2	108.125	105.029	21.9013	20.8399	21.8258	99.2664	99.8654	103.073	11.0969	11.5234	10.6402	81.4991	81.8542	82.0497	109.485	111.068	124.941	76.7628	82.5809	79.9025
EVM0008649	15.7947	15.1233	13.3728	21.5439	18.092	18.5894	8.79609	10.0294	11.0085	8.27162	7.42607	8.20869	12.1346	12.7603	11.5641	13.7955	11.9449	13.0575	11.1848	10.2774	11.9486
EVM0000081	2.37763	1.55202	1.25662	2.12555	1.617	2.61724	2.31678	1.54993	1.56553	1.00379	0.911119	0.689379	0.241406	0.597416	0.728376	1.16619	0.868743	0.779296	2.46571	1.69457	2.45386
EVM0000346	0.816885	0.481386	0.089089	0.791132	1.06995	1.00556	1.61816	1.61933	2.58975	0.498149	0.0822108	0	0.718812	0.474366	0.36147	1.67193	0.86226	2.19153	2.21423	1.00915	2.21413
EVM0020650	168.704	181.151	182.402	75.4923	66.2053	76.9975	83.3293	82.3842	79.773	73.2808	72.3664	65.1377	75.595	78.9005	72.4688	70.7941	74.9086	67.5821	66.7597	65.783	66.4264
EVM0027033	0.094344	0.250184	0.138903	3.24363	4.24005	4.13731	16.8197	14.0546	15.0072	8.28467	8.20344	8.7346	10.1489	10.0463	9.07998	12.3655	10.5631	14.0697	9.17588	9.96499	9.86742
EVM0021457	0.312527	0	0.102252	0.252229	0.0511684	0.0961782	0.439874	0.232323	0.0495399	0.0952919	0.518967	0.14725	0	0.20417	0.138293	0.516643	0.14138	0.221941	0.200636	0.257391	0.381191
EVM0022970	5.47998	4.94086	4.57197	0	0	0	0	0	0	0	0	0	0	0	0	0	0	0	0	0	0
EVM0014008	468.15	448.749	469.628	105.943	118.29	120.759	13.8816	13.324	11.1617	27.5206	27.3152	30.5625	4.97564	5.57588	6.4205	4.73675	5.21246	4.34386	18.2645	15.816	14.4877
add_RNAAddG006869	4.19823	3.01245	3.39352	1.19585	1.81947	0.341994	0.347582	0.550736	0.82206	0.564738	0.22368	0.465418	4.23746	7.58263	9.01534	4.549	3.68665	4.38437	23.1468	18.1522	25.0006
EVM0010782	0.306104	0.129877	0	11.1466	13.1105	9.38245	6.54866	6.608	6.75421	17.64	18.4652	22.0373	9.13109	9.67874	9.26479	6.24578	8.22536	7.65175	8.72513	8.77309	10.6033
EVM0023392	5.44221	3.27995	5.09891	4.6717	3.5236	2.6264	0	0	0	0.113139	0.336089	0	0	0	0	0	0	0	0	0	0
EVM0012451	4.3188	5.86109	6.04689	0.738115	0.436735	0.117272	0	0	0	0	0	0	0	0	0	0	0	0	0	0.0784605	0
EVM0000894	0.237189	0.503187	1.00884	0.153141	0.621339	0.510953	0.296744	0.141055	0.150391	2.53122	3.58058	2.53308	0.208713	0.103302	0	0.224057	0.214597	0.112293	0.203027	0.293015	0.482168
EVM0016326	18.1702	18.7275	17.3293	16.4575	20.7401	19.1523	18.4299	21.1303	19.8001	0.740193	1.66576	0.415921	6.60264	9.3233	10.9374	15.9481	15.5743	15.9858	12.1844	13.1773	12.3822
EVM0000953	13.709	11.2608	14.8506	0.323824	0.328463	0.0771739	0	0.0745671	0	0	0.0757131	0	0.110333	0	0	0	0	0	0	0	0
EVM0023426	20.0886	20.2939	23.2723	5.75719	5.70542	4.54199	0.256456	0.487618	0.0649863	0.187506	0	0	0	0	0	0	0.185462	0.194094	0.175462	0	0.083341
EVM0024997	8.60622	8.29898	5.51518	7.99049	6.00885	6.96054	0	0.0634474	0	0	0	0	0	0	0	0	0	0	0.273968	0	0.173505
EVM0027421	2.74802	1.94327	2.4725	20.6257	15.7471	20.7897	1.4325	1.56614	1.2342	7.75049	4.3558	6.8334	2.6196	2.19419	3.03998	3.24484	2.48628	1.73467	1.56815	3.58341	2.14141
EVM0007337	83.2326	92.8261	91.8789	64.6005	58.8466	61.5284	82.7734	83.868	82.5617	39.1397	40.9327	39.6576	51.4485	54.5281	52.2108	59.9651	65.0699	71.0956	47.6387	53.0769	50.2592
EVM0001826	0	0.233858	0	0.142345	0.721923	0.542782	0.275826	0.0655559	0.139789	2.82335	3.4613	2.21601	0.291	0.384079	0.390227	0.416525	0.299205	0.417508	0	0.0907866	0
EVM0011562	10.5295	13.0925	10.8231	13.625	12.1537	12.5295	16.1098	17.6897	15.7727	39.7301	36.9828	39.7435	32.5831	28.3176	29.7417	38.2941	36.9949	39.8384	31.2448	30.4237	34.8184
EVM0021248	0.36306	0.385109	1.06907	1.75807	0.356651	0.502782	0	0	0.17265	0.332099	0.657687	1.53953	1.67723	0.948732	1.44588	0.771659	1.2318	1.54696	0.699231	0.672769	0.221413
EVM0020180	2.68909	5.16997	3.6952	3.25539	2.6086	2.38955	4.0056	4.31781	3.99616	3.10546	2.801	3.45253	3.41626	2.76688	2.58807	2.76248	2.41775	3.72382	4.61795	3.86184	3.97687
EVM0013563	7.2177	10.527	8.20839	6.11638	7.15847	5.3501	15.8893	14.6105	14.1913	6.85612	6.63175	6.11467	12	11.9694	13.9115	12.2431	12.7622	14.8841	10.2028	15.261	14.221
EVM0005437	13.9222	12.2973	11.8871	0	0.203367	0	0.437066	0	0.0984473	0	0	0	0.751439	0.473357	0.343525	0.366675	1.19406	0.661573	0.531614	0.383622	0.315632
EVM0025955	4.41868	2.48554	2.03711	2.6584	3.15686	1.54525	7.03583	8.24164	7.64096	0.551163	0.606399	0.693964	8.04146	8.57253	8.17652	5.02782	4.08867	5.42004	7.13472	9.26323	8.49252
EVM0014266	4.53779	2.84873	2.54514	0	0	0	0.0868956	0	0	0	0	0	0	0	0	0.131221	0	0	0	0	0
EVM0011202	0	0.521258	0.361755	0.475922	0.724111	0.340267	0.230551	0.876728	0.934752	2.02279	2.22551	1.85227	0.486469	0.481553	0.65235	1.39262	1.1671	0.523467	0.946433	0.607078	1.49845
EVM0018423	4.11127	4.11867	4.70792	5.30888	5.49712	2.31956	0	0	0	0.835706	0.517195	0.7533	0.150737	0.447641	0.151602	0.485457	0.309974	0	0	0	0
EVM0005916	9.21437	8.77516	9.90243	55.9534	46.7782	53.0289	0.883532	1.13995	2.11095	43.6195	47.8217	44.4916	0.7102	1.31817	1.24999	0.381207	0.638947	0.28658	0.172713	0.332354	0.328141
EVM0014571	27.1075	27.7496	29.9856	2.16691	1.77527	1.03284	3.55288	2.14943	1.71876	6.53351	4.98849	3.64912	7.95101	9.33237	6.51158	5.24328	4.67154	4.15564	1.87836	2.76407	3.98857
EVM0016544	37.2065	31.6491	38.4601	0	0	0	5.39694	8.17721	7.00891	0.164414	0	0	4.03314	3.52269	5.24933	7.64057	9.26945	5.10574	8.53888	7.5496	5.70003
EVM0015337	0	0	0	0	0	0	0	0	0	0	0	0	0	0.182658	0	0	0.379451	0.198556	0	0	0
EVM0004362	19.9641	20.9662	20.2069	17.5521	17.3306	17.438	22.6651	22.1284	24.3202	16.9146	17.5952	18.0386	22.0151	17.8337	19.3598	20.4638	18.9849	19.9088	19.6338	20.3951	19.722
EVM0021082	9.73834	10.7933	9.92615	13.1797	13.3991	14.0336	10.5141	11.2486	10.0932	11.1348	11.2801	10.9413	14.5017	12.887	13.7148	11.6759	10.8864	12.7231	8.77657	9.48553	9.40335
EVM0002007	0.560116	0.679008	0.549773	1.70487	2.20092	1.92072	1.50162	1.14205	0.761024	1.0247	1.30456	1.13101	6.65374	5.85467	7.75417	4.76195	5.75542	4.77319	13.0477	3.65745	3.80627
EVM0022690	0	0	0	0	0	0	0	0	0	0	0	0	0	0	0	0	0	0	0	0	0
EVM0013946	3.38012	3.5854	3.31771	24.7412	25.7947	24.2095	2.00313	2.50739	2.23342	12.8557	10.1837	13.6458	6.01125	4.69532	3.96753	3.32743	3.47667	3.79009	2.92375	1.67028	2.64725
EVM0018201	0.580896	0.770218	4.06246	0	0	0	0.408798	0.712505	0.27624	0.332099	0.394612	0.410541	7.37981	4.55391	12.8201	4.42418	3.25195	3.71271	8.39077	2.78078	3.18835
EVM0004616	23.3612	21.9563	21.9388	14.446	13.9316	13.9407	17.9151	17.0726	16.4128	9.65595	10.1433	10.596	17.2045	16.8507	16.2675	17.5589	17.0667	19.4907	19.034	18.0302	18.4174
EVM0027227	0	0	0	0.80705	0	0.769347	1.45213	1.38052	1.58511	1.52452	0.86261	1.34614	0.942781	0.155542	0.790163	1.01209	0.969364	1.52173	2.29275	2.50011	2.32322
EVM0016497	0	0	0	0.0636134	0.161312	0.121283	11.2479	11.2499	11.0574	0	0	0	24.4487	22.7856	27.1177	23.2679	28.0351	25.8416	25.3429	27.021	24.8758
EVM0027599	0.0797542	0.338391	0.156563	5.94747	1.72362	3.90247	0.748347	1.20945	1.06194	0.072953	0	0.150307	0.631612	0.41682	0.423493	0.56504	0.216474	0.906198	1.33121	0.591155	0.486384
EVM0011250	808.026	885.731	874.222	304.357	298.047	303.124	219.575	208.513	200.544	385.649	392.945	393.714	135.526	127.27	124.63	126.757	123.974	136.651	168.774	165.517	174.607
EVM0001266	0	0.299253	0.369214	5.46452	5.45043	6.42473	3.88253	5.11716	3.48816	3.3548	6.13276	5.40554	7.81986	7.24936	8.86347	5.33002	7.65748	6.14399	14.9722	14.5218	12.7318
EVM0023746	53.3295	52.8346	55.6791	42.373	39.4017	40.469	33.68	34.6113	32.3866	40.4705	44.6705	39.493	35.1682	30.3743	33.5228	31.3165	31.7162	34.9363	22.7017	28.82	26.7574
EVM0013164	20.3543	22.3873	22.1905	13.4074	11.737	12.3517	13.4262	14.5192	14.2893	12.107	11.7615	12.9441	12.9844	13.3206	12.7741	12.7732	11.7485	14.8357	10.8854	10.4734	10.0352
EVM0007777	8.20772	8.92941	9.29558	2.90443	2.42919	3.49736	11.9471	12.5782	12.3599	4.23517	3.71709	4.56123	8.54179	7.49307	8.45115	9.31889	10.2821	8.96725	6.95803	6.04474	7.37992
EVM0016094	0.100378	0	0	0.680497	0.690246	0.278017	1.22443	1.0745	0.572809	2.02001	2.45479	1.79717	2.11985	1.18037	1.06601	0.995621	0.544906	0.997971	1.03105	1.48805	0.489729
EVM0005992	31.4359	36.5191	34.14	26.6743	25.0335	23.8241	27.1721	28.3293	26.9298	25.6059	24.2474	24.1953	24.0802	22.1553	24.9873	24.8476	25.5889	24.5863	14.2941	14.7072	12.7939
EVM0018968	22.53	23.0044	23.9478	0.141917	0.0719748	0.0338217	0	0.0326792	0	0.10053	0.564085	0.172604	0.0483538	0.239326	0.097263	0.103818	0	0	0	0.181026	0.0446828
EVM0002346	383.504	396.023	368.793	122.9	113.791	114.96	20.1084	26.6136	27.176	52.146	46.1795	54.1809	74.4129	71.1904	76.8856	43.6632	43.5305	45.2583	52.963	51.7374	53.5587
EVM0001760	0	0	0	1.30879	1.16159	1.71551	0.317008	0.753438	1.28528	0	0	0	0.222965	0.882848	0.448491	0.239357	1.60476	0.719767	1.51824	1.04342	0.206037
EVM0002657	0.087816	0.186298	1.46531	0.170095	0	0.0810744	0.164798	0.54835	0.417601	0	0.159079	0	0.11591	0.68843	0.116575	0.124431	0	0.124725	0.676512	0.21697	0.10711
EVM0008117	1.8532	1.39787	1.81898	6.42133	6.99878	6.27343	6.91693	7.53098	7.9119	11.1128	10.8546	11.1763	9.29507	10.4925	10.6058	9.04479	8.7747	10.0605	10.6281	9.97156	9.04146
EVM0014200	397.96	419.714	424.082	187.722	189.877	199.651	76.8559	68.5185	63.5922	308.793	322.329	315.193	27.5016	25.9304	29.2363	18.6538	16.5901	17.538	12.9949	11.5555	11.5297
EVM0011537	5.4244	6.02353	7.57039	0	0	0	8.1914	9.14836	10.3987	0.310114	0.153537	0	5.03419	6.31221	5.73818	1.44115	1.95543	2.16682	0.65294	1.46587	0.516888
EVM0011952	0	0	0	0	0	0	0.333693	0.761369	0.338233	0	0	0	0	0	0	0	0.193054	0.40408	0	0	0.0867526
EVM0013567	0	0	0	0	0	0	0	0	0.186574	0	0	0	0	0	0	0.0926544	0.0887426	0	0	0	0
EVM0001715	0.174582	0.246912	0.228477	1.97257	2.68683	3.59966	9.22812	9.24025	10.3499	0	0.105419	0.109674	1.45941	0.684313	0.927024	0.742122	1.3426	1.4051	2.31627	2.08483	2.20036
add_RNAAddG007531	0.463334	0.491472	0	2.01927	0.227578	0.427764	0.652131	1.4466	0.661003	0.211911	0	1.09152	0.611561	0.605381	1.23015	1.31305	0	0.658073	1.1898	1.14478	1.13026
EVM0026990	0.466295	0.123653	0.228842	1.35478	2.06129	1.18387	1.64074	2.39174	3.10439	0.533163	0.105587	0.329547	2.46187	1.98006	1.70226	2.31251	2.6895	0.662278	1.1974	2.5922	2.41716
add_RNAAddG007549	0	0	0.180878	0	0	0	0	0	0	0	0	0	0	0	0	0	0	0	0	0	0
EVM0012929	34.5937	29.195	38.0444	8.55919	9.54999	6.06122	2.36933	2.25249	3.72243	7.6222	8.11925	8.92287	6.16587	4.45395	3.85485	4.11463	3.76956	3.94502	1.29684	2.33956	0.92396
EVM0003694	30.5379	32.2249	29.2505	15.7054	15.3615	15.7981	29.3953	34.0515	32.5995	5.68307	3.62439	5.11028	25.9913	25.0408	24.3932	37.6755	35.0844	40.3817	39.8178	39.5468	44.2472
EVM0015033	127.775	124.192	119.841	93.2084	96.1213	100.716	48.0014	48.9189	51.4486	54.1755	54.7087	55.4775	53.9252	54.9669	57.4068	61.886	61.8249	62.0877	47.9801	46.5998	48.6368
EVM0006709	40.464	37.9155	38.4301	36.2683	34.9849	36.6314	47.9316	51.0252	54.1112	41.9298	45.7933	41.424	58.4846	56.295	51.6274	56.7165	59.422	62.6844	42.1356	42.1065	45.8366
EVM0013075	12.1977	8.79369	11.506	22.6036	23.5498	23.0589	7.53112	10.5041	11.0486	12.3168	13.583	13.4347	19.306	16.2132	18.9262	22.3714	24.0784	17.3994	15.1868	16.7647	13.1387
EVM0017601	11.2108	12.9755	10.9447	8.79065	8.29655	8.57422	18.1055	16.3547	17.1227	11.3269	8.82026	9.71441	17.6139	15.4331	16.9968	21.7196	21.2513	21.2586	15.3589	15.1489	15.2135
EVM0027301	4.30372	6.56075	5.37842	6.92396	6.65351	6.90446	9.33432	9.46141	9.81919	7.14201	7.51931	7.42393	8.19488	8.63444	7.30535	7.29781	9.54302	9.21895	7.73007	7.90238	9.03564
EVM0016488	0.423044	0.373946	0.346027	0.136569	1.17747	0.650945	1.65395	2.13845	2.34704	1.1609	0.894073	0.664402	3.90867	4.14555	2.52715	6.09424	4.11457	5.70806	3.62114	3.30989	3.95592
EVM0012446	0.987103	1.19663	0.415232	0.546276	0.484839	0.325472	2.77864	2.83031	1.94469	0.902925	0.383174	0.797282	0.837572	0.27637	0.093598	0.199811	0.574126	1.30184	0.181057	0.174205	0.257995
EVM0018941	44.3038	47.4405	43.5545	40.5309	34.7761	45.886	11.3136	14.3201	15.5345	33.9852	30.2233	34.68	15.5446	17.4025	15.0755	14.0055	14.3656	12.7442	7.38054	7.01464	8.46476
EVM0020401	14.595	17.966	18.0395	18.323	15.2224	11.6447	19.2741	16.3948	13.367	37.7437	32.804	34.8073	14.9832	15.0673	12.6773	16.8508	17.1175	25.3358	20.1275	16.2495	22.1971
EVM0026068	0	0	0	0.200495	0.305051	0.191129	10.4896	6.3712	8.36802	0	0.187511	0.682779	8.06089	7.03273	6.45826	6.60015	10.1144	10.1441	1.19613	1.79023	2.52506
EVM0021044	0	0.681249	0.630386	0.233249	0.236591	0.518822	0.451972	0.35807	0.458121	0	0	0.151299	0	0.209786	0	0	0	0	0	0	0
EVM0018296	30.0002	30.0785	32.2122	43.9512	40.3708	39.3505	39.2223	34.6172	37.0199	33.4565	31.161	31.0358	24.0996	20.3275	23.7704	17.8022	21.2734	20.846	24.6491	24.7317	21.4107
EVM0024503	0.405981	0.645954	0.89659	0.589773	1.19644	0.655924	0.0952346	0	0	0.09284	0.0919298	0.286922	0.669825	0.397834	0	0.143814	0.137742	0	0	0	0
EVM0021601	3.18615	5.65441	3.48816	5.16262	4.03277	5.20428	0	0	0	5.10028	4.93928	5.88924	1.05136	0.880624	0.97606	1.12866	1.08101	1.47942	1.96677	1.28679	1.34521
EVM0004317	11.6327	13.7186	12.198	1.04962	2.98104	1.66764	11.1185	13.8573	8.79593	1.65228	1.3743	1.83829	5.8174	3.30412	4.89166	5.52844	5.88337	6.36245	7.97815	7.76549	7.13828
EVM0007685	0	0	0	0.0513996	0	0	0	0	0	0	0	0	0.0700515	0	0.0704538	0	0.0720267	0	0.20443	0.0655644	0.129466
EVM0014044	11.1052	14.1719	12.3889	11.4321	8.60295	8.42617	1.73257	1.88244	1.9443	6.41823	8.18305	8.16537	3.67318	3.30864	4.06195	5.51305	5.36978	5.50733	3.40377	3.74747	2.91171
EVM0014636	4.43979	5.24005	6.015	5.99552	6.01998	6.35048	1.29085	0.948286	1.18947	5.54837	4.92758	4.83186	2.80626	1.38895	2.82238	2.56955	1.35783	2.30917	1.60577	1.46776	1.22034
EVM0024442	6.42228	6.29307	5.55416	8.09713	5.92422	5.78462	2.2598	2.75968	2.60712	6.35819	6.77469	8.5242	4.49687	4.91192	4.05483	6.1592	5.18169	5.84002	3.19278	3.4106	3.12854
EVM0025362	2.92621	2.57864	2.7838	0.523192	0.265343	0.872812	0.549141	0.642537	0.94196	0	0.326206	0.127265	0.356524	0.294101	0.298809	0.382735	0.366576	0.511518	0.809227	0.778603	0.549094
EVM0014101	0.476961	0.216826	0.200637	0.593903	0.334673	0.0629064	0.639344	1.09407	1.10167	0.249307	0.308579	0.513655	2.69806	0.712213	5.69847	1.06202	0.924713	1.35486	1.83719	2.10437	1.24661
EVM0014674	0.476961	0.433652	0.200637	0.197968	0.200804	0.125813	0.639344	3.58611	0.259217	0.311634	0.370294	0.192621	1.16916	1.15735	0.814067	2.51023	1.10966	5.9033	1.92468	1.59932	2.32701
EVM0002071	0	0	0	0	0.111143	0.104454	1.91089	3.12869	3.87379	0	0	0	2.09068	1.47826	2.10269	1.76345	1.38191	1.76761	8.86126	12.1599	10.3498
EVM0021035	0	0	0	0	0.111143	0	0	1.31203	0.538026	0.206983	0.409907	0.213227	3.13603	3.99129	1.35173	1.28251	0.614181	0.642769	4.358	4.75215	5.24389
EVM0003945	0.632503	0.587051	1.08644	3.98166	2.71836	3.86864	0.148372	0.0705277	0.0751954	0.144641	0.859339	0.0745022	0.313069	0.103302	0.209911	0.336086	0.321896	0.449172	0	0.195344	0.289301
EVM0006070	29.19	35.6101	31.1775	25.2996	26.9532	24.4211	34.6094	35.2477	32.9968	27.352	27.6047	26.7063	26.4566	26.7259	24.7183	28.1689	28.912	33.7191	19.8293	19.9584	18.4028
EVM0002528	0.919371	0.568869	0.714396	9.49746	6.73594	8.16961	3.27092	4.40815	4.00766	2.83827	2.98393	1.98536	2.98317	3.80389	2.39007	4.45091	4.57492	4.62464	7.62363	7.99766	8.59712
EVM0020155	0.688715	0.669662	0.90133	5.0859	6.11721	7.39167	2.15411	1.63831	1.69215	1.52246	1.71547	1.91992	1.43932	1.34979	1.40949	1.62646	1.75252	1.50803	2.65284	2.05614	2.8001
EVM0020140	51.7965	56.8426	59.2128	5.59388	5.33252	6.8385	26.6719	24.2355	25.5851	58.4844	60.4299	58.4847	31.9775	30.2219	31.9837	29.0618	31.5001	31.789	26.849	27.9802	25.1793
EVM0023152	0.661006	1.19195	1.622	12.4192	14.8049	16.7211	9.61361	8.07816	7.60693	0.0604638	0	0.0622876	8.37572	9.84567	8.68707	12.738	11.034	10.7026	7.80808	8.49249	11.0454
EVM0023326	54.2711	60.9052	59.3302	10.581	13.4158	9.15481	3.56576	4.34333	3.27544	71.2601	69.1631	67.3108	2.58632	4.03423	4.17764	3.95436	4.27091	2.61435	2.9733	2.64072	2.46239
EVM0004030	1.03178	1.69141	0.644464	0	0	0	0	0.167345	0.26763	0	0	0	0.247611	0.122555	0.124517	0.265816	0.38189	0.133222	0	0	0
EVM0016948	0	0	0	3.44483	2.25431	3.49576	1.83027	2.86591	2.07343	0	0	0	5.14923	5.24711	4.11257	7.80395	6.69588	7.49644	2.06251	3.11843	1.9593
EVM0017073	4.21248	4.29308	5.71561	2.43981	2.75875	2.05893	0.116254	0.110521	0.27495	0.831094	1.00998	1.36208	2.72555	3.66929	3.56356	1.11185	1.45725	1.11448	1.00749	0.612231	0.856332
EVM0011638	159.51	191.963	175.825	48.898	46.9881	44.349	4.66721	5.04487	5.96199	103.213	104.732	109.537	10.7023	10.2381	8.23112	7.43416	6.93534	7.0646	7.17381	6.6498	6.98103
EVM0006466	68.4109	71.3412	63.955	21.5428	19.6353	20.5364	73.6425	82.787	79.8336	34.3598	36.2087	31.2436	105.046	119.818	120.553	99.0908	94.836	110.8	91.3393	97.5395	93.4234
EVM0027525	1.44635	0.557887	0.129059	0	0	0.364177	0	0.117292	0.250109	0	0.119095	0.123902	0	0	0.349095	0.186311	0.178445	0	0	0.324869	0
EVM0001767	0.989493	0.524792	0.364208	0	0.607516	0.570956	0	0	0	0	0	0	0	0	0	0	0	0	0	0.152798	0.150861
EVM0013921	19.5464	24.3632	18.0914	14.4111	10.8995	11.6795	12.0407	11.3082	11.9579	16.3857	12.2568	22.4251	4.10604	3.69197	3.26928	4.15079	5.10136	3.4242	4.22718	3.26658	4.52155
EVM0000072	50.1369	50.4059	47.4598	30.1245	28.628	27.9485	42.3008	40.7453	38.9733	38.2994	41.9102	41.2481	43.0971	41.4183	43.1077	42.5576	40.9223	45.0233	33.3705	36.7364	34.3846
EVM0000846	0	0	0	0	0	0.0391475	84.866	55.9055	55.9356	0	0	0.0799135	111.488	117.73	112.41	90.3043	87.3549	89.0119	160.553	156.887	154.588
EVM0021943	0.602478	0.119825	0.221757	0.0729355	0.110971	0.17382	3.53322	2.41847	3.76035	0.241106	0.272848	0	4.4731	5.11669	4.24886	8.59018	8.0231	8.55698	4.15786	5.58211	6.20026
EVM0026292	59.5991	61.6565	62.3931	30.6626	32.9101	29.7211	46.0585	44.9914	45.557	37.4919	41.6444	35.4621	34.3926	32.5486	29.54	34.8345	35.5289	32.9414	39.7582	41.7404	37.3695
EVM0026249	3.5968	2.71306	3.45193	5.49604	4.86812	6.86273	0.149997	0.641701	1.06427	1.82782	2.24427	1.95827	1.37149	1.98423	2.33431	1.81209	0.867792	1.4758	1.74463	1.67861	1.55984
EVM0017777	13.53	13.4295	13.7068	7.94628	9.0743	8.12688	0.407885	0.72707	1.08527	24.0069	28.201	28.1616	1.64958	1.06494	0.937723	0.769936	0.811172	1.31198	0.0697669	0.134253	0.795308
EVM0008381	84.6805	90.4787	83.9889	60.2735	67.2468	64.3055	74.9622	72.5406	74.8431	70.2857	66.6224	72.7335	67.1543	67.3843	64.5655	65.8513	62.9137	73.4688	67.6562	69.4865	66.0611
EVM0024812	10.1875	10.4445	8.66058	69.1883	69.2164	61.6666	125.948	127.989	123.77	128.045	139.878	130.301	253.461	237.311	249.541	265.271	244.757	278.792	145.526	120.377	142.091
EVM0023031	0.0288553	0.0306077	0.0849675	0.0558913	0	0.0532802	0.135377	0.180182	0.192107	0	0	0	0.799817	0.603227	0.881021	0.36798	0.117481	0.286882	1.55606	1.56846	1.61897
EVM0017039	42.9457	38.2928	42.5126	44.0384	37.1443	41.1535	7.91405	10.5042	9.30055	44.9858	40.153	38.4719	13.6065	16.1308	14.3337	11.7201	12.2759	11.9214	5.96396	5.38591	5.76491
EVM0003407	6.09229	6.46228	6.82477	9.23514	12.62	11.9828	0.807766	1.71308	1.19664	1.27204	1.49949	2.24642	1.5733	0.865223	0.966981	1.12598	2.06701	0.94053	1.70049	1.30891	0.726927
EVM0015240	2.55526	4.30481	2.28677	4.36712	3.10077	5.62018	0.775706	2.14532	1.07217	0.206237	0.136143	0.141639	0.991976	1.27654	0.997672	1.38438	0.815956	1.49439	0.868457	0.835592	1.00833
EVM0002307	47.6808	47.5916	50.6365	65.8902	62.9027	65.3522	41.6886	50.1197	47.0434	66.466	73.7154	74.5991	35.037	36.5621	34.5326	47.4481	52.9129	49.2032	45.5237	44.8438	45.3812
EVM0023314	7.70682	8.44865	8.93987	17.749	19.7782	15.3878	6.22803	6.54589	6.8739	29.8849	32.9319	29.1533	9.00422	8.81688	8.17481	7.21047	7.90692	6.65139	6.81776	7.60749	8.05077
EVM0026487	0.207709	0.073441	0	0	0	0.0639211	1.23435	1.79109	2.23888	0	0	0	1.18802	1.08555	0.643375	0.588628	0.751702	0.885026	0.622276	0.769791	1.35117
EVM0008850	15.5183	13.6269	16.2536	15.3144	15.0514	16.213	52.7883	49.7471	51.8065	6.12717	5.87138	5.16436	46.4622	46.7626	46.1814	67.5525	62.4078	68.0467	36.5456	34.4831	37.9513
EVM0027302	21.0615	25.8361	24.9384	58.2787	55.7826	57.4962	45.7089	49.5896	51.7815	44.3848	48.881	43.9686	46.0802	44.1794	45.2036	53.3253	52.435	48.5673	56.4757	52.4505	56.1544
EVM0006815	4.49899	5.66194	3.96684	0.2954	0.973804	0.2112	0.500853	0.136044	0.0725239	0.627762	2.14109	0.934119	0.301946	0	0.202453	0.324145	0	0.32491	0	0.0942018	0.186015
EVM0011600	1.63112	1.27883	1.18335	1.78575	1.39333	1.24401	0.465808	0.126525	0.0674493	1.42716	1.34893	1.40338	0.561638	0.370642	0.847294	0.301465	0.0962456	0.302176	0.455281	0.175221	0.259499
EVM0019547	0.709644	0.627284	0.69654	2.74909	3.3694	3.87639	28.9654	29.0141	34.7589	5.03074	6.05269	4.01225	37.5448	38.2472	29.753	49.9415	53.6917	53.671	49.5819	52.4542	46.3795
EVM0001848	2.28047	2.28074	2.87789	1.38825	1.28012	0.962469	0.489098	0.929958	0.619691	10.132	9.20644	8.22731	2.06402	1.70263	4.15174	1.66182	0.972682	2.86879	1.17121	1.20738	0.794716
EVM0013615	1.84957	2.56217	2.65538	1.26992	1.38303	1.69483	0.932496	1.25589	0.853291	0.64391	0.475072	0.208105	0.546553	0.667271	0.549691	0.743198	0.449571	0.744953	0.265832	0.289875	0.404047
EVM0024132	5.73186	4.95404	5.36556	6.88755	5.83923	5.73281	0.896383	0.473433	0.45429	2.08752	1.97091	1.80041	1.61118	1.04016	1.12726	0.977622	1.29648	0.904551	0.340716	0.458951	0.453133
EVM0012149	0.323615	0.686535	1.27056	1.72377	3.49692	1.19508	0.303653	1.01038	2.15449	0.444027	0.586231	0.304947	0.640715	0.422827	0.429596	0	0.658781	1.14907	1.45428	0.999458	1.18414
EVM0013840	5.88677	5.35752	5.0259	5.16143	6.05661	5.37053	7.12519	8.6071	5.89697	4.81124	4.70097	5.12049	6.52867	4.9608	5.31766	6.9593	6.76002	7.22309	5.18799	5.50804	5.43821
EVM0013517	2.43097	2.43265	2.25102	10.3946	10.3633	11.984	11.4482	15.057	12.6945	15.5657	14.7899	14.5225	21.2499	21.8742	25.0253	11.7636	14.815	13.2245	9.83494	7.59286	9.56656
EVM0019237	0	0	0	12.574	12.5028	11.9275	101.9	128.368	127.253	117.123	103.114	121.078	40.5206	38.022	36.1685	43.4997	40.7951	41.0589	39.581	35.6338	38.7704
EVM0019803	131.133	128.028	124.313	113.155	104.59	112.278	171.875	171.773	165.814	113.248	112.493	115.955	111.648	120.306	112.072	116.982	134.017	132.032	66.4824	67.6436	67.3845
EVM0002292	12.2593	10.8365	10.4604	7.01573	7.89172	8.3171	16.5356	16.8594	17.5114	12.4244	12.4919	13.6743	17.1005	16.7761	16.8289	18.4236	17.3937	20.9733	16.6645	16.0339	17.4165
EVM0027175	6.84141	8.11401	7.7197	4.41716	4.02181	4.14449	11.1371	10.8281	10.1785	6.80003	7.13996	7.37741	11.5424	11.2615	11.561	12.2892	11.8678	12.5988	14.0176	14.2414	13.3381
EVM0007499	7.24511	6.54925	6.28391	3.33183	3.26765	2.90273	2.5226	2.68274	3.05531	2.45917	2.24934	2.46895	2.5862	2.50053	2.66154	2.25981	2.04072	2.58873	1.31638	1.6606	1.19493
EVM0009141	10.4329	10.1882	10.5653	11.5474	11.6586	14.1167	28.2804	27.8214	26.9851	20.5002	22.5492	21.3267	26.5939	23.1517	21.8369	22.761	21.2007	24.226	15.309	14.8661	14.6776
EVM0004957	0	0	0	0	0	0	0	0	0	0	0.0665635	0	0	0	0	0	0	0.313131	0	0	0
EVM0008486	220.326	242.893	226.821	149.304	140.059	145.916	105.638	102.417	101.322	163.502	159.591	147.792	85.8987	86.3619	79.2067	99.5225	105.864	106.088	77.3449	85.7458	73.0861
EVM0000935	2.95498	4.76979	4.66588	26.6274	25.7467	27.5778	18.0226	17.363	17.9623	79.503	79.6545	71.1263	21.4517	25.7673	24.6449	19.8431	19.6155	18.6126	11.0523	11.9831	12.1446
EVM0011401	140.013	136.813	141.604	92.2362	85.2953	92.9516	51.2973	56.5351	55.9948	109.473	111.492	121.773	80.583	85.2633	83.2788	58.2558	57.542	47.2206	32.778	31.721	34.4567
EVM0014333	13.8747	14.8782	13.4697	12.5562	12.5499	10.8146	17.4297	16.3673	17.8471	15.431	14.6616	14.6104	14.0603	12.2837	12.4301	10.9042	12.8105	12.976	10.1728	11.5674	11.652
EVM0001002	0	0.0996227	0.18437	0.0909582	0	0	0	0.16756	0	0	0	0	0	0	0	0	0	0	0	0	0
EVM0007595	7.03617	6.71712	8.58347	0	0.394969	0	0.943164	1.25531	2.48559	0	0	0.189437	4.37822	4.72798	5.87115	4.98496	6.54788	4.42567	6.84013	5.4637	5.27184
EVM0009216	62.6868	61.2487	66.4219	6.95159	7.20787	8.17309	1.7212	2.02761	2.42729	0.109429	0	0.150307	1.57903	1.97989	1.95865	1.4126	1.67767	1.69912	0.716807	0.394103	0.389107
EVM0013944	19.7916	23.0749	22.8796	30.7993	30.609	30.4224	9.55521	10.4119	9.33127	6.5607	7.7221	7.30056	13.1732	11.2278	12.8896	10.4984	9.96336	10.7154	13.9872	14.2102	15.268
EVM0021257	11.4741	15.6396	13.9651	43.4493	48.4112	46.5042	25.7853	25.5885	26.7363	83.2301	87.1427	83.7945	34.9845	32.3822	31.6821	24.1435	25.0706	25.4227	37.6408	34.4445	37.7865
EVM0023509	11.9085	12.2275	10.3795	72.243	63.5917	61.9196	18.5934	22.5205	18.8464	42.5696	40.0813	39.9935	17.1013	15.8705	16.8834	17.0087	14.8038	15.1546	20.6109	18.0655	19.87
EVM0010567	2.88835	1.81325	2.48787	0.0570876	0	0.217683	3.15267	3.73335	3.588	0.107838	0	0.333274	2.1785	2.15649	2.34751	2.67276	1.67994	2.09302	1.05958	0.655379	0.718968
EVM0014155	35.9943	38.2339	40.2952	65.8975	70.6185	71.9032	36.2899	41.0664	42.7498	6.54794	6.14008	5.72053	44.6381	44.7819	41.0665	43.6189	42.0863	43.5423	28.8073	29.8733	28.8775
EVM0023471	0.585526	0.555708	0.725955	2.65626	3.26951	1.93469	6.13025	5.663	6.0378	16.7162	16.6081	15.42	4.27098	4.59021	3.60005	4.67232	4.30776	4.4645	2.73019	2.43652	2.4808
EVM0009800	26.788	24.5598	27.5691	19.6732	21.4919	20.8429	44.9415	42.3388	44.4771	11.7124	10.0716	10.3647	40.2184	41.3215	42.7178	48.3931	47.5585	57.9764	44.9634	44.5701	43.1244
EVM0020877	21.0693	25.3829	25.3025	9.76335	10.5543	7.66478	9.42659	8.46386	9.09038	38.7366	36.2399	36.5851	9.94517	8.52294	9.35399	10.2315	10.557	10.0575	8.19624	8.36009	6.85006
EVM0013308	12.8829	13.4855	14.9744	4.43255	3.16388	3.20823	1.51103	1.28531	1.6122	4.18654	3.99195	2.71548	1.34245	1.66111	1.35016	0.840669	0.690151	0.601896	1.63235	1.46587	1.34391
EVM0002929	0.328717	0.209208	0.516235	2.35582	1.84061	1.76019	0.246752	0.322553	0.3439	2.49568	3.63239	3.74803	0.260327	0.343595	0.305458	0.512354	0.490722	0.466876	0.464264	0.28426	0.521219
add_RNAAddG009966	2.05151	1.08805	2.73278	16.3204	16.5542	19.0754	3.29994	3.00649	4.04168	23.0549	21.8998	19.884	14.6996	14.1681	15.173	12.6657	14.3186	10.8225	10.1599	6.51695	10.7239
EVM0001629	42.1463	39.2195	42.122	17.2099	18.5128	19.9518	22.2479	24.8511	25.473	5.43385	4.03543	4.15006	29.944	28.3032	33.311	34.6126	33.4292	30.5484	25.7091	27.5831	25.3595
EVM0002285	56.7499	58.2167	56.9357	38.7677	35.9931	37.7302	8.18397	7.67846	8.91113	46.6497	48.1932	47.4109	2.46332	1.84126	2.1741	2.32062	2.11926	2.05562	1.07585	1.12924	1.44011
EVM0010499	0	0	0.157078	0	0	0	0.300323	0	0	0	0	0	0.84492	1.25457	1.06221	0.22676	0.217186	0.227295	0.205476	0	0
EVM0015686	0.434376	0.460755	0	0	0	0	0	0	0.413127	0	0	0	0	0	0	0	0	0	0	0	0
EVM0024689	102.165	110.259	110.972	34.2423	31.4346	35.8689	0	0.672364	0.260677	7.70938	6.14428	4.90721	0.180884	0.447641	0.272884	0	0.278977	0.681244	0	0.169298	0.0835758
EVM0004725	49.2762	56.3518	53.3508	30.7446	29.8183	31.8346	41.7109	42.3431	40.1612	31.7321	30.2238	29.5209	35.1677	30.7221	33.0917	34.7632	32.8234	36.6896	26.8258	25.8966	26.2471
EVM0006858	23.3225	21.9554	22.9208	3.91208	3.62055	4.89984	1.7983	1.4203	1.87885	5.1244	5.36792	5.7513	4.98144	4.35324	5.71459	6.97705	7.08263	6.70038	4.24002	4.37096	4.78307
EVM0003172	376.921	384.223	398.008	235.317	231.795	243.291	30.7985	31.9574	33.5904	277.848	284.516	269.883	50.27	55.8231	53.1979	44.9623	45.9209	45.2346	31.1322	32.1693	30.0973
EVM0003778	0.533639	0.566047	0.327366	0.646019	0.851856	2.21702	1342.37	956.462	1004.35	4.33217	2.35631	1.82285	1307.46	1543.43	1541.93	1508.69	1538.6	1327.41	2331.55	2408.2	2549.26
EVM0018709	0.172518	0.274492	0.846662	0.250619	0.169473	0.477821	0	0	0.164079	0.0789031	0	0	0	0.112704	0	0	0.234129	0	0	0.213123	0
EVM0015139	9.24606	13.5361	14.7755	17.0951	17.5652	17.8485	205.78	173.41	179.436	10.6943	13.4271	11.881	61.02	65.7948	64.8193	50.3477	54.4443	54.3737	23.4488	24.8269	19.1997
EVM0004324	0	0	0	0	0	0	0	0	0	0	0	0	0	0	0	0	0	0	0	0	0
EVM0018835	42.7125	34.0644	39.4171	25.9696	25.2127	24.7564	16.115	17.8262	19.6132	32.7628	30.4754	32.608	16.2641	14.348	10.5943	12.0319	15.5097	11.6976	9.18115	8.2816	8.79959
EVM0026408	0	0	0	0	0	0	0.253606	0.401834	0	0	0	0	0	0	0	0	0.122268	0.255917	0.23135	0.111298	0
EVM0024012	3.88783	3.69733	3.15811	3.72199	3.68751	4.29074	1.80304	1.75399	1.40256	0.654031	0.445237	0.800089	1.1207	1.51809	0.830518	1.70965	2.24394	1.33287	1.54918	1.43535	1.14462
EVM0015765	18.0427	16.6534	17.1261	41.9916	38.0934	34.2513	95.0823	103.619	108.348	37.454	34.0464	40.8903	105.367	110.196	104.162	99.0919	102.88	95.5017	51.0462	51.4902	52.4155
EVM0019384	1.51458	1.60656	3.37866	7.33415	7.84499	4.44915	2.8423	3.93039	4.32147	16.2472	15.7137	17.5158	2.72606	2.33871	1.46225	1.17059	1.49489	1.56447	0.353573	1.36077	0.67176
EVM0003683	4.68421	2.87661	2.25853	1.43259	1.93749	1.97263	4.85793	6.96421	9.53542	0	0	0	6.18276	5.90553	5.89098	6.40442	6.46861	6.06939	4.64264	4.87303	4.91149
EVM0020238	17.6625	20.2063	18.4975	18.4488	18.072	15.0261	30.0458	30.9293	31.696	24.2158	26.6755	25.8688	28.5355	25.7422	26.5875	29.2463	25.7418	27.6352	21.8923	20.4087	18.3091
EVM0026154	23.7724	23.1595	25.0986	24.4109	26.9137	26.2539	7.56718	8.27186	8.39171	14.651	14.8382	15.4901	8.27091	7.89362	9.25096	9.87439	8.12276	8.38111	11.9782	11.5943	10.659
EVM0024855	69.9549	62.0813	68.4228	80.4772	71.3662	87.042	70.2353	68.8106	68.8619	65.4827	59.7391	63.2274	76.4964	72.5239	69.3505	73.5614	76.1054	76.6334	66.8665	65.1427	69.6932
EVM0001048	26.0426	36.2414	32.3053	34.9326	33.9282	37.0722	10.6718	12.5887	13.7751	21.826	18.7949	18.9849	9.49728	11.2816	7.94958	10.064	10.2061	10.0218	14.3645	13.0753	13.4758
EVM0022481	45.3531	48.8111	45.7588	31.307	30.3337	29.232	33.8407	36.2069	32.5804	28.1351	26.1113	26.1423	28.8963	34.8294	29.0622	30.3371	27.7467	34.7772	28.3414	26.4493	23.8336
EVM0006797	3.46322	1.90237	2.48875	12.8172	13.6084	12.7323	17.2925	17.8741	17.4102	13.6898	12.6033	13.1121	23.3456	22.7056	27.9128	36.2785	33.9075	34.0804	16.6749	18.4886	20.3663
EVM0019510	0.298467	0	0.292955	0	0	0.275553	0	0	0	0	0	0	0	0.194985	0	0.422913	0.202529	0.211956	0	0.184358	0
EVM0014974	7.45731	5.08512	5.57684	0	0	0	0	0	0	0	0	0	0	0	0	0	0	0	0	0	0
EVM0025692	8.56256	7.20745	14.3147	10.4861	9.33396	9.43525	8.29356	5.56848	7.881	10.3589	9.30669	9.73441	28.2181	23.0249	22.7335	21.6824	18.5178	16.3983	12.0579	13.3759	12.3978
EVM0004220	3.08656	4.20944	4.47222	1.92166	1.66042	2.78176	0.206869	0.458891	0	1.00834	0.798762	1.80051	0.484999	0.192039	0.390227	0.312394	0	0.208754	0.37743	0	0.268907
EVM0013061	0.026938	0.114296	0	0.521775	0.555713	0.2487	0.101106	0	0.0512406	0.0492816	0.170795	0.203073	0.213335	0.0351966	0.1788	0.15268	0.292467	0.53564	0.138349	0.266227	0.164282
EVM0013607	7.61543	8.23477	8.78109	7.30375	6.02839	8.46426	24.004	24.2712	26.7214	7.84522	8.70585	7.94253	2.92768	3.96074	5.20195	2.51434	2.90989	3.67541	2.18341	1.46142	1.62325
EVM0005008	0.533485	0.3574	0.551193	0.842982	1.2688	0.881368	0.263462	0.125235	0.320456	0.436623	0.457774	0.291043	0.148243	0.146745	0.335462	0.716138	0.457268	0.478552	0.216307	0.173434	0.445212
EVM0003328	45.0471	49.5059	45.6258	53.5504	57.8774	54.1636	70.6428	67.2149	73.3272	49.0924	54.836	46.4521	62.2622	74.8576	67.2644	60.9968	60.4565	60.2534	58.0793	69.6973	61.1169
EVM0001578	0.453261	0	0.444892	0.146324	0	0	0	0	0	0	0	0.142372	0.199422	0.394814	0	0	0	0.429178	0	0	0.184282
EVM0022950	13.4214	12.3824	12.9285	3.92972	3.18881	3.34271	4.92027	5.40155	4.69035	3.1406	3.33597	3.76475	0.576771	0.407817	1.40877	0.353815	1.10135	0.7093	0.0801513	0.154236	0.152281
EVM0015430	2.21395	1.53549	1.33727	85.5186	85.9072	85.2183	4.23466	2.73453	4.94017	76.7219	77.2809	67.7224	6.18162	9.56813	6.10408	4.58493	7.6271	3.99105	4.81058	3.99736	3.94669
EVM0022143	8.10834	8.71103	6.32608	0.906083	0.919063	0.479863	0.195082	0	0	0	0	0	0.960464	0.950759	0.827983	0	0	0.147644	0	0.12842	0.253585
EVM0011383	153.762	153.24	151.505	92.6525	83.4891	80.1079	48.6182	49.2638	47.2107	122.107	117.238	118.057	45.6154	47.2216	45.0897	48.4786	45.9622	45.6438	36.3742	38.0516	32.1418
EVM0018995	0	0.444867	0	0	0	0	0	0.18706	0.398881	0.287724	0.189935	0	0.276784	0.136994	0.139187	0.148567	0	0	0.538488	0.388582	0.511541
EVM0004586	1.22339	0.973263	0.420279	2.07343	1.92287	2.20246	5.05087	8.56684	9.36652	26.9134	22.882	24.555	13.3218	15.1054	12.4239	11.8744	13.5314	13.3793	10.9169	10.5793	10.296
EVM0013673	49.7844	51.2703	52.6073	15.0443	16.2503	15.3305	15.2262	15.6559	16.6321	19.9161	18.9788	18.5869	17.9666	17.291	16.7313	16.698	16.5916	18.5275	13.4315	12.1058	12.6825
EVM0010715	74.5848	77.6345	76.5783	13.4074	11.86	13.1278	0.30209	0.478655	0.663434	24.9338	32.8058	31.6018	0.354121	0.350542	0.356154	0.68428	0.946674	1.21937	0.344474	0.662876	0.130894
EVM0002511	54.4503	52.0609	57.1223	16.7313	17.8297	15.2963	2.65614	2.59943	3.99883	7.31111	5.24105	5.96256	5.43968	3.86177	5.19461	6.96034	6.21451	6.91765	4.5432	4.4227	4.62051
EVM0009463	0	0	0	0	0	0	8.18632	6.92522	5.90684	0	0	0	16.883	19.3207	18.5503	5.8668	7.52559	7.77086	56.5789	54.7118	57.445
EVM0014388	0	0	0	1.91752	2.50071	0.261135	0	0	0.538026	0	0.256192	0	0	0	0.37548	0	0	0	0.363166	0	0
EVM0024896	0	0	0	0	0.107396	0	1.1797	0.195047	0.675857	0	0	0	2.23666	2.42833	1.74155	2.32365	3.04158	2.71732	4.98313	4.99714	3.26697
EVM0017379	3.38295	2.30683	2.08716	1.82537	3.08586	2.81092	6.03113	7.11325	7.35421	6.63099	6.78484	6.01129	24.3035	24.8788	22.9675	15.8185	15.2162	17.9837	13.1548	13.0152	12.9681
EVM0003949	1.90607	2.21438	0.623623	0	0	0	1.61816	2.10513	1.29488	0	0	0	2.15644	3.08338	2.16882	4.11552	3.32586	2.96501	2.79692	1.79405	3.09979
EVM0022968	59.2298	62.628	61.5703	10.226	9.20637	9.4022	1.58287	1.11468	1.42614	3.14329	2.43338	2.11949	0.329866	0.2449	0.33176	0.0885294	0.339167	0.266215	0.24066	0.308737	0.228617
EVM0001969	0.278	0	0.272867	4.98087	4.41501	3.16545	1.04341	0.330652	0.396602	5.67922	4.1547	4.62803	1.40659	1.39238	2.33728	2.23218	2.38946	1.57937	0.773371	0.801343	0.847697
EVM0001784	11.7604	12.0908	11.0697	11.5649	12.3823	10.6906	0.792258	0.537992	0.286799	3.42035	2.62205	2.5574	0.875644	0.551597	0.960733	0.512739	0.409243	0.428291	0.309742	0.44703	0.441363
EVM0019346	52.2382	52.4943	56.3964	51.2232	51.545	52.4871	0.91823	1.08079	1.28528	55.9677	58.88	58.7098	1.6607	1.64392	1.54652	1.45265	1.26484	1.98556	1.25647	1.55433	1.30727
EVM0017785	3.72944	1.59759	4.57572	2.25742	3.02952	2.21817	0.706608	0.73574	0.81854	0.295218	0.227362	0.506871	0.378657	0.562246	0.380831	0.863803	0.389334	0.967706	0.736683	0.753105	0.962251
EVM0017529	0	0	0	0	0	0.0841109	0.854853	0.568888	0.259945	0.750022	0.990225	0.686797	0.601254	0.595178	0.604706	1.03273	1.36005	0.776378	0.350925	0.225096	0.444485
EVM0012808	38.6357	35.1134	37.6492	55.8571	49.6738	53.5901	43.561	47.5338	44.1243	59.1466	56.663	56.125	57.9312	56.4978	61.1771	61.3144	62.5009	61.2835	52.583	54.2968	53.5331
EVM0018169	8.02904	6.11937	7.47215	17.5102	19.397	20.7005	3.29254	4.72179	4.35551	2.66573	2.69346	3.92306	6.75109	6.29434	5.68454	7.75307	8.23288	6.5043	5.57447	4.99615	5.80331
EVM0027082	3.72186	3.10191	2.08751	2.83213	3.00328	3.55885	1.24724	2.7272	2.27559	6.201	7.70536	5.76178	2.80716	4.34187	2.29392	4.14363	4.32947	3.20945	3.41337	2.62735	2.43192
EVM0007496	4.576	4.28619	4.62283	2.15108	2.97053	2.49529	3.03825	2.69746	2.57057	1.64004	2.06025	1.73994	4.23854	4.65025	4.68917	5.00517	4.79386	5.54909	3.50461	3.57034	3.23132
EVM0005395	12.1742	14.0639	11.709	6.60668	6.08274	4.68315	7.68114	7.86407	9.41597	3.84	3.01019	3.16467	8.91176	7.58758	8.54497	6.89019	6.26694	6.85676	8.21982	6.5258	8.02183
EVM0027426	44.1718	43.0758	39.3602	35.1894	35.5935	44.9152	15.089	12.166	13.9392	38.1706	37.612	37.6916	14.2399	13.4311	16.0781	14.8542	15.4702	16.0457	14.8974	11.5675	13.5312
EVM0008869	0	0	0	0	0	0	2.00856	2.69068	2.49859	0	0	0	0.128428	0.25426	0.258331	0.27574	0.264098	0.414586	0.124929	0.240403	0.593388
EVM0019691	8.66193	7.32274	8.34217	5.61359	6.07788	6.31338	10.1748	9.64401	8.30015	5.51054	7.40316	6.47458	8.33835	8.169	6.70034	7.52101	7.60121	7.81626	5.6862	6.47672	6.27545
EVM0009562	66.5438	65.5731	62.6527	80.8859	78.6923	83.5697	57.2667	66.5801	70.7369	76.9969	75.4891	76.1863	37.2464	39.2708	38.9703	43.3323	39.2466	44.1802	37.8607	35.8334	38.6876
EVM0011427	0	0	0.189491	0	0	0.071294	0	0.0344429	0.0367224	0	0	0	0	0.100897	0.102512	0.0547102	0	0	0.0495751	0	0
EVM0003459	36.2778	37.5913	34.7332	39.3482	39.6029	46.1736	37.9262	33.2968	36.6971	21.3395	20.3706	22.8725	34.1828	35.4128	31.665	31.0504	37.8502	30.4536	23.2896	23.2502	25.1934
EVM0003893	0	0	0	0	0	0	0.921171	1.36227	0.726214	0	0	0	4.17534	6.9836	4.34412	8.34638	6.06951	3.56333	4.0616	4.44691	3.9914
EVM0022626	0.368561	0.293208	0.271317	0.803119	0.271541	0.2552	0.432284	0.575353	0.963963	0.337131	0.500739	0.260476	1.58102	1.32427	1.71242	1.82782	0.875325	1.963	0.709825	1.13827	1.01146
EVM0010321	4.40937	3.91711	5.19354	2.0818	3.89838	1.4248	0.0517173	0.0983339	0.104842	0.65542	0.19969	0.571315	0.1455	0.0720148	0.0731676	0.0780985	0	0	0	0.13618	0
EVM0014907	0	0	0	0	0	0	0	0	0.173948	0	0	0	0.241406	0.477933	0.364188	0.388731	0.496425	0.389648	0.352244	0.225943	0.223078
EVM0001605	0	0	0	0	0	0	0.736276	0	0	0	0	0	0	0.170874	0	0	0	1.11448	0	0	0
EVM0016635	0.0436193	0.0462683	0.0428139	0.337953	0.471343	0.241624	0.122786	0.428014	0.456341	0.279297	0.0395084	0.123309	1.20905	1.02586	1.2739	0.679872	0.887956	1.23905	1.0641	0.431087	0.532027
EVM0000161	0	0	0	0	0	0	0.200216	0	0	0	0	0	0	0.139397	0	0	0	0	0	0	0
EVM0013600	1.69458	2.0652	1.45095	0.419019	0.212511	0.199722	1.55622	0.868389	0.822988	0	0.195941	0.101925	2.61741	1.93145	1.77092	0.970674	1.95725	2.40681	2.22206	1.29169	1.93496
EVM0027253	1.07532	1.24432	1.24737	0.378698	0.672215	0.812264	1.10072	1.87486	1.4411	0.13413	0.177086	0.276352	4.19347	5.04518	3.04962	3.18587	2.38803	3.40166	3.70269	3.68333	3.69625
EVM0022636	92.0936	94.7041	95.9123	0.786617	1.5344	1.26901	0.0586248	0	0.118845	0	0	0.0588746	0.164933	0.489799	0.16588	0.177059	0.254375	0.443692	0.08022	0.385921	0.152411
EVM0010945	0.760767	0.372447	0.804159	6.40434	8.45067	7.23974	0.768751	0.939652	1.33579	0.0535301	0.477047	0.386014	1.77657	3.59369	1.39834	4.06312	4.12984	3.57401	2.70496	2.74719	4.63956
EVM0007204	0	0	0.0966634	0.190754	0	0.272764	0	0.351401	0.187329	0	0	0.092801	0	0	0	0	0	0.139874	0	0	0
EVM0004701	0	0.109486	0.202624	1.19957	0	0.0952939	7.36068	9.66788	6.47914	0.188832	0	0	67.1657	62.0366	63.9889	62.5972	49.3082	53.2159	33.7945	34.4283	34.999
EVM0014538	1.34075	1.15128	1.06533	0.680157	1.06621	0.589438	7.06903	6.26481	5.95077	0.350404	0.0578281	0.120325	6.48881	10.0102	8.47541	7.14679	7.97146	6.61959	14.3455	15.0646	14.7958
EVM0004948	0.322186	0.85438	0.474355	3.74434	3.32324	2.97452	7.70896	14.945	15.7809	0.294711	0.729553	0.303601	12.7577	9.26113	13.0448	25.1087	28.8584	22.6512	5.58458	5.37324	6.68053
EVM0011841	0.400083	0.169752	0.078539	1.39489	0.471625	0.443242	3.30356	2.99789	2.73969	0	0.0724753	0	100.017	117.721	117.906	146.373	133.243	139.673	42.4307	43.6916	41.2834
EVM0020701	2.45552	3.25581	1.73232	0	0.226142	0.141688	0	0	0	0	0	0	0	0	0	0.10873	0	0	0.0985246	0.189592	0
EVM0021231	44.6524	43.5591	41.5156	12.2371	9.3619	11.5666	7.33467	8.7401	8.60565	1.95897	2.95814	2.37123	3.53341	3.98739	3.19833	3.03455	2.61579	3.04171	1.92481	1.91811	1.69788
EVM0015450	30.2051	31.7112	32.5028	101.906	117.533	106.802	117.666	108.495	110.79	43.3124	41.2058	46.3686	134.637	143.304	132.781	107.788	99.8767	93.273	53.4843	54.213	57.8289
EVM0008750	12.4191	11.4314	8.05936	15.2084	15.5271	19.0463	0.192612	0.274671	0.195233	5.82085	3.25375	6.18987	0.135472	0.134103	0.272501	0.290865	0	0.291551	0.263564	0.507179	0.250375
EVM0019808	4.25997	3.8507	6.07198	7.39033	6.65924	5.95069	1.84219	1.22263	0.880779	1.49091	1.40919	0.907566	0.488938	0.435598	1.08184	1.41719	1.35736	1.63098	1.37929	1.46438	1.17473
EVM0001439	4.53195	5.22354	4.62339	10.3679	9.85038	10.6413	9.10751	9.67702	8.99385	3.88435	3.94323	3.02636	10.0324	12.542	10.9901	13.2982	13.6085	14.2419	8.24716	8.3759	7.70389
EVM0026387	36.3176	40.5317	34.6462	40.5332	43.6418	41.1947	48.2915	48.5521	54.6746	36.6403	34.8298	39.6214	47.6157	43.8992	44.4086	44.1679	38.9426	41.031	37.1546	34.7289	32.0382
EVM0019432	15.9956	13.7197	15.8129	10.2658	11.2774	11.6586	2.15439	2.62846	2.69323	4.41046	4.57518	3.49778	2.82851	2.74993	2.99715	3.63291	3.58339	3.64148	2.94799	2.83643	2.61377
EVM0028027	2.92516	1.30644	1.5615	0	0	0	0	0.0457785	0	0	0.0929642	0	0	0.0670517	0	0	0	0	0.0658909	0	0
EVM0007008	0	0	0.0520549	0.821796	1.09406	0.930293	1.99051	2.93315	1.71496	1.79493	1.44108	1.5992	1.68001	1.45516	2.25288	2.10412	2.15923	2.10908	2.51947	1.63792	1.8759
EVM0002169	68.3283	76.0626	69.2434	57.5317	64.2174	60.304	57.8211	61.1403	63.881	50.5229	44.6708	50.8527	39.9362	42.5683	41.0768	36.0636	39.4857	43.7235	31.8651	35.6169	34.8433
EVM0005650	0	0	0	0.17154	0.173997	0	0	0.0790013	0	0	0	0	0	0	0	0	0	0	0	0	0
EVM0020839	15.8404	16.9838	16.0516	16.7326	12.704	13.6451	18.4908	16.1446	17.213	15.178	16.0208	16.2484	6.18657	5.85585	6.04043	7.41705	6.17529	6.85145	3.77775	4.0997	4.2981
EVM0002063	0.780482	1.24182	0.893749	0	0	0	0	0.116037	0	0	0	0	0	0	0	0	0	0	0	0.160697	0
EVM0019150	23.3689	27.8008	29.7689	14.3664	13.2738	12.4361	22.9697	24.9476	23.095	19.3182	20.9755	20.9742	26.6506	25.2974	23.8545	35.9019	33.8519	36.3661	26.4482	26.9585	24.816
EVM0016419	2.9773	3.15811	3.59671	1.75426	1.88165	2.21052	5.35287	5.46035	5.24748	1.84734	1.79152	1.74612	1.42901	1.41457	1.3543	1.18006	1.15849	1.47855	1.52374	1.44036	1.59986
EVM0005784	9.47247	10.4407	10.0767	4.33067	3.30103	3.9085	7.74612	7.71818	6.14029	6.53482	6.23109	6.50755	10.2677	10.9245	9.72955	9.82285	9.51586	11.1238	11.1091	10.656	10.65
EVM0010632	19.3527	16.2023	14.2904	16.1096	12.8263	13.9699	1.57758	2.01035	1.59904	20.091	18.5008	13.5509	3.73007	2.9913	3.08667	4.30843	5.19457	4.01376	3.21509	3.97725	4.10136
EVM0016861	1.14381	0.849292	1.01042	0.0553875	0	0.1584	0.536628	0.357115	0.598322	1.09858	1.55402	0.862264	0.603892	0.821962	0.60736	0.729327	0.93138	0.812276	0.440581	0.635862	0.418534
EVM0021475	0.493909	1.44074	1.33317	0.119585	1.09168	0.455992	0.463443	0.550736	0.82206	0	0	0	0.162979	0.322665	0.327831	0.174962	0	0	0	0	0
EVM0012042	15.9964	13.5088	13.7113	15.9188	17.4456	17.7382	28.0759	28.1851	24.4344	56.6747	58.0349	52.9445	32.2233	34.3735	31.7648	33.6557	32.474	33.5474	24.4993	27.1651	24.6707
EVM0007938	0.304063	0.322529	1.11918	5.59506	5.60054	6.03548	2.71042	0.881522	1.73513	0.695333	0.275406	0.214892	4.21404	2.68165	4.8437	1.72337	2.06326	2.05134	1.75682	2.5355	2.59607
EVM0023984	9.0283	6.86711	6.39764	20.0891	20.9826	19.11	6.11594	4.91076	5.82218	8.5001	9.8528	10.707	3.37152	4.43075	3.0401	4.61785	4.36311	4.06579	12.1574	11.7517	16.0075
EVM0021860	2.70278	3.63609	3.1058	0	0	0.0608607	0.0618552	0	0	0.542699	0.298543	0.372713	0	0	0	0.0934077	0	0.187256	0	0	0.0804049
EVM0009848	57.488	66.1047	59.8923	59.0954	63.2281	62.969	17.2056	13.152	17.6165	151.524	148.299	146.171	9.9755	9.71282	11.1019	11.7622	11.6019	10.2063	10.3401	9.33653	7.48031
EVM0012776	29.5591	32.0196	33.0338	16.7617	17.1287	18.0569	17.9538	16.3278	15.8816	21.5868	23.4809	21.7685	19.045	18.8043	18.7624	17.8568	17.7039	17.9776	17.7681	18.8052	18.7018
EVM0017473	10.425	11.4507	12.6544	27.063	27.8749	26.5391	0.81034	0.770379	0.997372	38.0311	36.5408	35.865	0.97705	0.886579	1.3921	0.699255	0.502299	0.26284	0.871231	0.228616	0.677154
EVM0016144	29.899	32.1601	31.453	14.7267	13.311	14.254	17.8351	18.1207	17.1905	23.2747	21.272	23.0537	12.4057	13.3164	12.0435	12.5577	11.1412	11.7923	11.6185	14.0312	13.2559
EVM0002964	1.37171	2.71603	2.24397	0.619952	0.2695	0.253281	0.343227	0.244726	0.0869741	0.669193	0.165658	0.172345	1.44843	1.91173	0.728376	0.259154	0.496425	0.649414	0.939317	0.90377	1.56155
EVM0025108	204.473	209.036	214.007	315.011	312.732	312.361	155.949	154.148	152.726	461.103	465.834	461.772	48.7492	50.9375	50.8648	35.268	34.4449	35.5413	14.8334	14.6578	14.6352
EVM0022148	486.692	489.993	511.502	521.133	525.342	570.445	263.775	261.532	274.174	631.091	663.217	641.965	126.425	132.424	119.758	97.703	109.954	104.211	49.4307	50.0718	48.5205
EVM0002972	259.431	248.248	242.335	142.075	154.216	155.719	82.8522	80.3915	88.26	132.328	135.107	127.635	39.0375	42.0033	37.2702	24.4461	21.8143	16.5895	13.7587	13.238	14.5079
EVM0016557	24.8152	28.077	25.0426	79.7536	74.7928	79.6594	6.10572	5.70624	7.30767	86.6263	77.086	72.5416	23.2432	26.851	23.5719	16.461	20.4061	18.6407	7.83561	7.67533	7.93675
EVM0011355	88.5809	77.289	86.9997	8.06786	9.1109	8.76769	0.260554	0.544952	0.21128	0.660408	1.25756	1.04666	0.513125	0.580503	0.368622	0.314771	0.376852	0.315514	0.0713066	0.274433	0.474168
EVM0012956	119.807	127.426	124.514	23.4164	22.2304	23.048	10.5628	9.46454	10.3547	33.0483	33.3523	34.3719	9.8243	10.5707	9.45112	10.6776	10.164	10.0134	9.70506	9.42346	8.06346
EVM0003343	20.6638	21.0044	21.9308	34.053	33.6942	31.8297	8.52292	9.48264	9.14335	44.3126	42.6972	45.1287	7.17593	7.33443	7.09979	8.29849	9.02788	8.69475	7.43446	6.68898	8.14066
EVM0026779	30.8486	28.5584	28.7053	34.5877	37.527	37.8206	35.1187	35.0143	42.5896	27.8133	29.844	27.9751	34.369	33.2994	29.6493	30.9424	36.2384	33.214	29.7417	27.4551	25.0841
EVM0027190	48.3087	46.4441	50.1812	40.3382	44.6891	36.8777	55.8201	62.1277	54.9561	42.3934	46.075	43.9939	117.725	113.859	112.85	34.1046	34.1706	30.0635	60.7112	57.1484	49.9695
EVM0009342	426.677	427.034	429.325	389.169	385.679	372.231	41.8424	45.252	41.6053	426.793	403.091	422.135	61.5584	68.1054	63.3687	46.5063	44.4751	47.9622	56.359	59.9569	57.5542
EVM0008962	0.276421	0.293208	1.35658	0.133853	0	0.3828	0.25937	0	0.394349	0.252848	0.500739	0.260476	0.182426	0.180582	0	0.195838	0.562709	0	0.177456	0	0.168576
EVM0015348	0.990376	0.829359	0.306975	2.27168	2.86748	2.06931	30.3241	29.7121	33.7607	6.4368	3.96585	5.01006	16.4433	16.4815	15.4306	22.9701	26.5984	22.8022	14.1884	12.6212	12.7155
EVM0003335	0.187116	0	0.734642	0.181217	0.183813	1.72751	0	0	0	0	0	0	0	0	0	0	0	0	0.240248	0	0.228226
EVM0011523	17.8874	19.639	19.6094	13.3286	12.3431	12.9165	11.4153	10.3267	10.1785	13.3191	14.3593	15.0643	13.5486	12.6915	12.1124	13.9791	12.9246	15.929	9.46976	9.48712	8.60173
EVM0014460	1.46789	2.22434	1.98965	3.52019	2.67796	2.3232	0.0655878	0	0	1.79028	2.40585	1.64668	0	0	0	0	0	0	0	0	0
EVM0020163	148.676	142.58	148.092	4.46793	4.73793	3.6784	2.55793	1.96413	3.19105	15.5371	12.7257	11.5597	4.42854	3.83582	4.1756	1.63423	3.13047	2.97835	2.28857	1.55433	2.81348
EVM0024708	0.438289	0	0.107549	0	0	0.303481	0	0	0	0	0	0	0	0	0	0	0	0	0	0	0
EVM0027983	37.5988	37.4592	39.4497	35.5764	34.6305	33.0024	54.918	57.0563	59.4819	28.1239	27.4008	25.0162	30.9661	39.8491	32.7831	39.4539	38.2071	34.7242	34.7994	36.7621	28.4645
EVM0024818	9.64123	11.4415	11.7898	8.25396	8.45069	8.08965	8.5967	9.47946	10.0815	5.94434	5.57245	5.59661	8.50717	7.37726	6.75289	10.0006	8.53017	9.30548	7.69409	7.0081	9.35561
EVM0022653	16.2167	15.4712	18.837	15.0085	18.5698	17.0093	16.0717	17.4619	15.6972	30.4575	26.8562	30.3816	36.5399	36.1079	34.2657	39.9061	37.505	32.0956	19.6511	23.1157	18.9018
EVM0024966	13.6786	12.0971	12.1933	25.1798	25.1071	24.2855	25.5423	30.2171	28.9888	18.4732	20.7208	19.2224	19.6674	21.1982	18.5187	25.9708	24.3216	26.5142	27.1067	25.5777	28.6482
EVM0010637	20.8685	23.2768	23.6506	24.7527	20.5424	21.054	20.1868	21.2256	23.3261	15.2711	15.8618	16.867	13.9711	14.2234	13.2516	13.535	12.8467	12.7725	12.9828	10.7373	10.9161
EVM0018624	7.81591	9.47494	8.76753	12.4356	12.6921	11.0447	23.4232	19.5647	24.2729	4.08537	4.11755	2.55522	20.001	17.1938	15.034	25.6528	23.3792	22.3151	14.9505	14.4833	12.7432
EVM0024695	41.6317	35.4041	40.5107	72.4124	82.1462	83.4981	75.8823	92.6299	87.7238	51.5413	49.7357	56.9289	54.4765	52.9882	55.4246	50.0061	58.1232	42.9878	58.8294	58.0809	47.4224
EVM0016528	106.57	111.566	109.764	66.0308	63.7555	62.1749	17.1547	15.3153	15.8288	89.4743	89.0453	86.314	18.0882	18.9159	19.3009	17.8839	15.5335	19.0685	15.4904	16.471	14.4134
EVM0003487	6.86717	7.98835	7.90869	15.2079	16.9098	13.9479	11.4481	12.1495	10.9943	19.745	20.3393	20.1465	10.2122	11.3053	11.0305	11.8063	9.59923	10.9238	9.84582	10.6326	10.8049
EVM0013012	7.78948	6.81296	6.3043	1.19114	1.4767	0.883164	5.77026	4.75428	4.67901	2.87509	1.48534	1.41652	5.77204	4.82094	3.44683	3.29184	3.15285	4.07598	5.08841	4.05173	3.50032
EVM0020427	5.87416	3.03556	5.76569	1.16697	2.73727	0.834338	2.54391	2.41847	2.07715	1.79108	1.84173	1.41931	0.894621	1.18077	1.99946	1.49395	0.919846	1.06962	0.580167	0.558211	0.826701
EVM0018501	8.51567	10.3695	7.53383	5.73236	7.46505	5.81712	11.5019	11.5138	8.97076	5.55393	5.22278	5.46958	9.97987	11.7251	9.83441	13.3649	12.2824	11.5524	10.7867	11.1333	9.03589
EVM0001087	0	0	0	0	0	0	0.115276	0	0	0	0	0	0	0	0	0	0	0	0	0	0
EVM0005889	28.0267	30.9908	31.2073	3.77699	6.49338	6.52979	2.29486	1.29722	1.76028	8.52539	7.54374	7.84824	3.22814	2.15914	2.72019	1.77957	2.60151	1.68989	1.27306	1.46985	1.12873
EVM0007702	2.87043	3.74738	2.49234	5.13219	4.33809	3.36354	1.96823	2.46207	1.68001	0.100986	0	0	0.43716	0.57699	0.586227	0	0.299657	0	0	0	0
EVM0018557	1.10922	0.990808	1.37525	2.65736	2.98218	2.42542	44.3162	42.7037	48.9724	1.06803	0.79317	0.880199	35.8314	34.4014	31.3097	51.453	49.2014	49.4186	26.3101	25.0259	23.2845
EVM0006323	3.85227	2.39005	4.20919	7.9544	6.92593	7.58279	80.6817	81.5658	86.1345	3.59025	3.09421	2.12324	44.5148	45.5845	42.2617	88.2628	84.2404	90.0196	43.2088	49.8345	45.3906
EVM0010142	0.0809934	0.257736	0.476987	0.31376	0.716074	0.67298	0	0	0.0770315	0.148173	0.586881	0.53425	0.106904	0	0.215037	0.229528	0.439675	0	0	0.30017	0
EVM0015575	83.2859	86.3796	86.581	13.0426	14.263	15.1919	14.9663	14.3784	15.25	5.04297	3.6975	4.71921	14.7203	16.0012	15.3077	16.4585	20.5613	16.3778	9.56422	9.46222	7.59701
EVM0001606	131.355	125.551	129.379	157.091	142.081	153.821	98.4947	100.581	105.714	73.4534	72.9924	77.4489	156.38	145.527	139.271	130.571	119.465	129.822	122.798	122.323	125.24
EVM0001289	18.6745	22.1476	18.6002	15.8167	15.2309	15.9684	1.35784	2.8891	2.75262	6.4924	6.11667	5.58436	10.005	8.19323	8.50735	7.90896	9.16487	8.31912	5.92794	6.38464	5.21106
EVM0013376	15.3439	16.4052	13.982	4.96653	5.15762	6.53813	2.67326	1.81531	2.47738	0.372292	0.368642	0.153409	1.98766	2.12711	2.26922	3.22952	3.25888	3.41056	3.18768	3.21789	3.47494
EVM0009746	0.0750001	0	0.220846	0.798992	0.957791	0.553939	0	0.133807	0.0713313	0	0	0	0	0	0.199124	0	0	0	0	0	0
EVM0010558	0.875001	0.804388	0.515306	3.89811	3.26631	4.46998	0.547352	0.468324	0.499319	1.70748	0.528357	1.75899	1.38591	1.06704	0.542061	1.07452	0.633328	0.99421	0.599181	0.576506	0.782646
EVM0008636	2.61794	3.47116	2.8908	3.96157	2.62531	3.72615	4.81056	3.50298	4.46103	5.28827	4.59422	6.42429	4.10335	4.13315	3.69251	4.09591	3.77494	5.42246	5.46215	4.44691	4.32402
EVM0015577	18.6745	20.2471	21.4409	63.9341	66.3392	70.8082	47.007	48.8074	49.4161	90.3263	82.8247	100.454	144.345	149.279	152.309	162.475	163.378	159.14	111.038	103.176	96.9088
EVM0004328	0	0	0	0	0	0	0.0522301	0.0496545	0	0	0	0	0	0	0	0	0	0	0	0	0
EVM0014963	0	0	0	0.0899167	0	0	0.174233	0.331283	0.353208	0	0	0	2.32837	2.91138	1.60224	3.42043	4.03203	3.8241	2.26494	2.40862	3.85023
EVM0018007	0	0	0	0	0	0	0	0	0	0	0	0	0	0	0	0	0	0	0	0	0
EVM0024182	28.3077	27.2321	33.3179	13.8263	13.0012	14.2552	2.2997	2.40493	1.1655	2.35397	1.38744	2.19403	2.99233	3.92278	3.1722	2.34413	1.66309	1.74049	1.80943	2.04373	1.86835
EVM0020467	0.093919	0.0996227	0	0.363833	0	0	1.23376	1.08914	1.0719	0.17182	0.0850676	0.354005	1.11569	0.736274	0.748061	0.665395	0.509842	0.933752	1.56764	1.85639	1.83286
EVM0008409	206.619	213.116	217.418	235.06	224.083	228.385	423.062	410.137	395.14	137.705	125.241	133.576	357.154	376.374	373.446	445.738	436.609	447.912	161.044	163.327	174.997
EVM0010141	7.05323	7.91951	7.362	7.29737	7.94268	7.55998	8.49061	6.44525	7.03543	4.5949	5.3601	5.54404	4.58671	4.49541	3.6539	5.6552	5.46313	6.25495	5.61033	4.12289	4.90993
EVM0022122	0.26895	0	0	0	0.0880675	0	0	0	0	0.410025	0.730808	0.253436	0	0	0	0	0	0	0	0	0
EVM0000789	0.412289	1.57438	0.242805	0.159716	0.405011	0.532892	0.0773714	0.147112	0	0	0.224059	0	0.217674	0.215475	0.218924	0.233678	0.447624	0.585573	0.95285	1.22239	0.905168
EVM0006087	7.86013	6.45057	9.05496	12.2198	10.2816	11.6489	7.37529	6.60565	7.67236	10.3685	8.50575	9.31688	4.85972	6.32407	5.60156	6.85832	5.4459	6.99202	6.16147	6.13273	5.49994
EVM0014245	6.67277	5.75264	5.58408	4.50566	4.0479	3.9761	2.6691	2.65605	2.42729	2.84517	3.22662	3.70758	4.49146	5.21025	5.99948	5.83875	5.52008	5.66374	4.40324	4.00671	4.47473
EVM0004557	2.50932	2.77035	3.31749	2.18223	1.25767	1.3711	6.05452	5.29913	5.08973	2.45928	2.6439	2.29219	2.87273	2.50915	2.20941	2.32202	2.08498	3.01847	1.64381	1.89792	1.78016
EVM0001423	0	0.481386	0.089089	0.175807	0	0	0	0	0	0.249075	0.493265	1.19741	0.119802	0	0	0.25722	0.36954	0.128913	0	0.224256	0.221413
EVM0024577	0	0	0	0	0	0	0.0836065	0	0	0	0	0	0.588039	0.232839	0.236566	0.126254	0.60462	0.632762	1.14404	0.990671	0.652075
EVM0012664	5.40556	5.57457	4.56884	0	0.442512	0	0.986247	0.535778	1.14247	0	0	0	0	0.588565	0.398658	0.851048	0.203779	0.213264	0.192792	1.11298	0.915722
EVM0002390	77.1989	77.4512	80.1244	51.1934	50.0782	50.7323	128.197	126.24	131.85	54.1667	52.9159	56.037	120.774	135.727	129.406	173.384	175.655	166.903	104.865	106.735	102.117
EVM0014621	2.63258	2.90415	4.23771	3.87537	8.27555	4.0832	4.44634	4.13315	4.30654	1.92646	2.09833	1.48843	2.08487	3.99001	2.09684	3.43182	2.42947	3.29036	2.7041	2.34159	2.56878
EVM0018744	22.3686	22.9661	26.0522	25.9582	27.8035	27.7559	36.2868	40.0239	42.4867	30.6618	30.3611	31.771	32.3652	31.6973	31.6853	36.7776	35.0478	28.0651	30.395	27.6334	31.1012
EVM0008367	0.579167	1.22868	0.78165	0.911477	1.28012	1.67095	1.90205	1.87283	1.37709	0.198667	0.459011	0.272879	1.14668	0.567545	0.576631	1.33356	0.982507	0.925415	0.55772	0.268307	0.883018
EVM0014215	85.0178	93.3458	94.3861	26.7728	27.6154	26.7832	62.0648	65.1932	64.6188	30.1864	31.9091	34.0102	70.7934	67.0721	63.8986	81.7541	73.4726	83.5298	63.6954	65.2374	65.8134
EVM0009843	0	0.942071	0.871735	0	0.14541	0	0.833351	0.660213	1.26703	0	0	0.418452	0.976885	0.580208	0.392998	0.209741	0.803543	1.05118	0.570164	0.365724	0.722176
EVM0017788	54.2807	54.4634	58.5355	4.78811	3.64253	3.47086	6.42696	6.01815	7.29809	13.9911	15.0667	16.694	2.44711	2.15323	2.1877	2.18918	1.88708	2.26749	2.2482	2.67209	3.4548
EVM0027961	217.226	258.023	244.519	29.0177	26.93	28.375	83.5452	86.8649	93.7156	34.9653	36.9307	40.0223	249.109	224.697	218.453	246.962	218.09	262.681	165.482	163.131	169.822
EVM0022676	15.8252	19.8268	19.6653	13.9961	13.61	12.3223	30.0343	25.9163	26.098	19.2554	20.0402	20.8491	12.7298	13.4595	11.4552	15.485	15.358	12.977	11.4629	12.5784	11.1078
EVM0027025	59.4882	62.7986	63.9832	39.6452	35.9523	37.0039	67.1369	68.1189	67.4783	56.1528	55.0574	54.1473	56.2046	58.0772	54.594	60.6507	59.2072	65.4704	40.3649	44.5867	45.6046
EVM0026014	0	0	0	0.102427	0	0.0976417	60.8324	48.2095	45.9685	0.193484	0	0	115.864	109.857	107.825	58.1451	61.7185	57.3811	272.128	254.383	267.799
EVM0027735	0.595368	0.451089	0.333928	7.49578	8.02092	7.45969	4.94798	3.56592	5.50066	6.06836	7.62664	5.77054	21.6666	17.7804	20.4361	26.9955	29.8957	30.3208	10.4836	11.0325	12.7599
EVM0004416	0	0	0	0	0	0	3.61781	1.59387	2.41488	0	0	0	7.44749	5.89779	7.61509	4.93027	4.72211	3.07199	40.6905	21.7246	18.2375
EVM0009096	0.326968	0.216765	0.220639	12.5279	11.6634	11.7162	15.1099	13.0887	12.6722	23.5716	22.2299	21.3364	16.022	16.6344	16.2225	19.5164	19.9127	20.6654	10.8102	12.4712	13.4098
EVM0016090	6.12378	7.21742	7.93079	0	0.501307	0	1.11729	1.36567	1.69873	0	0.23111	0	1.79619	1.44466	2.48395	0	0.346282	0.2416	0.109204	0.210142	0
EVM0002522	4.21932	3.86526	3.20018	2.41463	2.54343	2.56743	6.61343	7.31379	5.10736	3.37707	2.95311	2.3946	2.215	3.75877	3.69165	3.32898	3.25351	2.86015	2.58559	2.48774	3.68431
EVM0020291	9.34308	8.55905	7.22528	2.26213	2.6422	1.96041	20.5886	18.8788	19.1858	5.30908	3.52606	4.13527	12.986	13.5022	13.7183	14.6428	14.4088	12.2647	11.1782	10.7552	10.7052
EVM0000508	87.6836	88.5745	88.5973	78.0718	78.9875	79.0463	66.4398	75.2253	75.7372	22.943	24.6346	24.9968	80.1765	71.6118	70.0178	52.8712	48.7479	54.3154	32.4692	28.2439	26.6269
EVM0014951	0	0	0.197321	0.584087	0.987424	0	0.754531	0.179331	0	0	0	0	0	0	0	0	0	0	0	0	0
EVM0014731	0	0	0	0	0	0	0	0.091945	0	0	0	0	0	0	0	0	0	0	0.13234	0	0
EVM0011655	0	0	0	0	0	0	0.161876	0	0.164079	0	0	0	0	0	0.114508	0	0	0	0	0.106562	0.105211
EVM0023756	3.48506	5.11565	2.93697	3.51156	4.04601	2.66501	1.88278	1.53871	1.67403	5.63512	4.36824	4.34553	2.64847	3.54161	3.69177	3.19235	3.96529	2.24992	1.89835	1.34813	2.87677
EVM0027656	13.1289	12.8719	11.545	23.4245	21.4817	22.789	24.4049	26.4157	28.479	17.5025	13.5046	14.9864	35.0407	31.3316	32.8228	21.8894	24.3376	21.0587	48.0715	48.8105	44.4031
EVM0020414	0.71998	1.03646	0.60573	1.44437	2.02077	1.04454	1.25463	1.37626	2.69013	1.41125	1.86321	2.66533	0	0.20158	0.477884	0.21861	0.139587	0.219126	0.198091	0.127063	0.250904
EVM0006258	0	0	0	0	0	0.303481	0	0.29323	0	0	0	0	0	0.214747	0	0.232888	0.446111	0	0	0	0
EVM0017480	20.4248	19.2701	22.4655	0	0	0.189516	0	0.274671	0	0	0	0	0	0.134103	0	0	0.139292	0	0.131782	0	0
EVM0022102	0	0.337285	0.468154	0.153975	0.780904	0	0.14918	0.283647	0.15121	0.290858	0	0	0	0	0.844218	0.225277	0.215766	0	0	0	0.193918
EVM0012395	22.8614	24.4982	25.8583	17.4064	17.9145	16.2959	30.8448	31.9871	32.3223	22.7326	25.6383	24.8527	26.7751	26.9635	22.8487	28.0385	27.0136	30.5992	21.3853	22.0225	22.0646
EVM0026913	19.2927	15.8058	17.9742	22.1024	23.228	26.1382	34.8072	33.7903	34.6094	16.5714	14.0648	17.6625	41.9236	35.2494	40.9671	42.8945	40.977	41.6591	40.2781	38.9476	41.2757
EVM0003634	0.255158	0.81196	0.500892	0	0	0	3.43167	3.03483	2.83122	0.933594	0.385184	1.28234	2.3575	2.22255	1.6936	0.964124	0.807992	0.8456	0.218408	0.525356	0.518696
EVM0015157	43.5211	49.4884	49.4709	47.5803	51.5257	48.0551	61.3544	65.9168	62.3012	25.1748	26.3792	26.3561	66.4014	68.6552	58.8063	67.9778	69.1051	72.4889	49.5865	49.1072	47.0189
EVM0011868	15.6162	17.69	15.0675	15.6377	15.7314	17.0498	46.4787	42.7671	41.4036	18.4091	17.658	17.371	35.5788	36.9087	37.6757	38.1945	41.0816	38.9439	37.93	40.3448	39.3076
EVM0021085	25.2144	26.1876	26.0397	29.6964	30.7493	29.0029	37.8333	42.1354	43.8161	19.0082	18.073	19.794	41.7126	46.3481	42.4509	51.3285	52.4762	52.1968	47.9582	43.1258	47.2999
EVM0017923	2.64728	2.17227	3.57893	0.145122	0.196268	0.0922283	0.515545	0.534678	0.380043	13.1128	13.4367	12.7553	0.593352	0.652618	0.928293	1.20318	0.88123	0.638479	1.28264	1.48092	1.15753
EVM0000903	0.239655	0.190657	0.0588075	0	0	0	1.01193	1.22925	1.08268	0	0	0	0.237243	0.547974	0.795353	0.0848952	0.406555	0.0850956	0	0.148031	0
EVM0009157	0.109572	0.464906	0.107549	0.424471	0.215276	0.404641	0	0	0	0	0	0	0.289252	0.286329	0	0.155259	0	0	0	0.406086	0.133646
EVM0009753	25.0444	23.0112	19.8996	20.8448	22.0919	24.7995	19.9293	21.4288	22.1449	17.9217	18.3633	19.5326	11.8433	15.5821	12.5898	13.5188	15.2601	11.4535	12.5415	11.225	8.24278
EVM0009928	0.0732682	0.621742	0.215746	0.354792	0	0.135287	0.206246	0	0.278736	0	0.066363	0	1.45062	2.01034	1.16716	0.41527	0.497172	1.04063	0.188146	0.452566	0.178731
EVM0022781	0.152269	0.201896	0.448373	0.221203	0	0.105435	0	0	0	0.174105	0	0.143486	0	0.0497379	0	0	0	0	0	0	0
EVM0027226	46.0465	44.8187	45.0502	56.9863	57.5103	59.8183	39.9953	37.7908	42.1668	40.997	38.54	38.9391	70.2524	73.4788	71.6927	59.3957	60.5729	59.0077	52.9134	55.5059	53.3051
EVM0025550	1.61344	1.87976	1.42788	14.6523	11.6144	12.0875	24.173	24.2079	22.7159	30.9929	33.2045	30.3575	16.7575	17.2102	16.1164	19.0764	19.9581	23.1786	24.7572	24.8986	24.2603
EVM0005441	0	0	0	0	0	0	0	0	0	0	0	0	0	0	0	0	0	0	0	0	0.192658
EVM0004979	14.7346	14.6281	14.7848	5.32642	5.08018	3.63768	9.5894	6.7367	7.80713	39.6457	45.2051	40.8416	15.0603	14.5327	13.2943	10.0029	10.4718	9.85166	5.84947	7.04781	7.90961
EVM0008972	1.08022	0.509256	1.06028	2.78978	3.8909	3.21351	0.563106	0	0.114154	0.219579	0.434852	0.452405	0.950535	1.25457	0.955993	1.7007	1.466	1.1933	0.616427	0	1.17116
EVM0025530	0.99795	0.529278	0.979522	14.7994	16.4206	16.8144	46.9367	55.7498	50.4227	0.228212	0	0	56.9692	53.9488	47.8574	46.6636	50.0262	52.1776	32.5937	32.7472	29.289
EVM0011756	108.292	110.112	106.584	63.3611	57.9521	63.0802	27.6927	24.7681	27.7872	59.7842	58.3617	56.7401	26.5067	27.2729	28.2348	30.3245	27.5674	30.4429	30.315	31.2046	31.9754
EVM0013110	0	0	0	0.0529397	0.0536981	0	0	0	0	0	0	0	0	0	0	0	0	0	0	0	0
EVM0008387	29.9545	32.5109	30.834	31.3997	30.0402	25.7621	39.6169	39.5542	41.7424	31.2781	32.1045	31.8286	37.9321	40.9086	41.4713	45.4478	39.8976	46.4928	36.1402	34.9443	34.586
EVM0010196	0	0	0	0	0	0	0	0	0	0	0	0	0	0	0	0	0	0	0	0	0
EVM0010097	13.1625	15.8314	16.0113	19.7932	21.1819	20.4957	29.9441	30.3742	32.2061	25.8295	25.1347	27.1741	19.7987	23.2734	19.3151	21.0418	17.0999	20.6121	16.9001	16.5848	19.8965
EVM0017251	2.07124	2.60578	1.7966	0.0466498	0	0.088941	0	0.214842	0.0458121	0	0	0.0907796	0.127156	0.125871	0.19183	0.136505	0.0653708	0.342067	0.0618461	0.0595057	0
EVM0021686	0.610032	0.16177	0.673614	0	0	0	0	0	0	0	0	0	0	0	0	0	0	0	0	0	0
EVM0003473	4.47293	3.5145	4.95946	4.41214	4.0685	3.05892	1.08812	0.960569	0.945362	0.454611	1.05036	1.32692	1.7493	0.974038	1.20955	1.5258	1.23655	0.823524	0.850823	0.409313	0.303093
EVM0025852	0.252218	0.267535	0.371341	0.203556	0.330355	0.116428	9.07198	7.31217	5.91705	0.23071	0.228448	0.237669	7.65684	7.52455	7.25439	10.1258	10.7822	10.3288	7.5562	8.67237	9.63914
EVM0005141	0.331404	0.632754	0.260227	0.0641912	0.0651108	0.0611924	0.124385	0.0591254	0.126077	0.0606285	0.0600341	0	0.437424	0.346403	0.439936	0	0.179903	0.0941384	0.51061	0.245643	0.323372
EVM0027746	155.114	148.373	131.832	175.706	188.938	177.1	154.145	158.781	157.151	134.79	142.329	130.485	185.295	155.876	172.179	174.94	176.633	192.041	142.567	145.992	165.536
EVM0025586	0.446331	0.591796	0.693641	4.35862	5.26143	3.88029	9.00419	8.36109	9.2682	7.21275	6.40088	7.14994	12.666	11.6633	10.27	13.7027	10.7012	12.7313	17.3831	18.1037	17.103
EVM0008908	1529.03	1464.07	1533.39	196.646	188.167	214.164	134.665	149.092	145.12	249.207	260.985	252.432	168.357	186.477	171.849	97.3235	91.5339	97.2392	156.162	161.726	163.397
EVM0004039	0	0	0	0	0	0	1.45689	0.369345	1.18137	0.0946837	0	0	0.819752	1.62294	1.23669	1.4667	2.95003	2.64629	0.664517	0.511496	0.378758
EVM0007623	6.06546	8.77948	8.37205	6.42495	6.64113	5.71648	4.50563	6.3688	3.78575	5.43263	4.57818	5.23928	5.08707	6.60416	5.20016	5.01345	5.05902	5.11502	4.94849	5.38565	4.77793
EVM0001825	1.32916	1.5918	1.47295	2.24232	2.06384	2.53341	61.4735	64.3321	68.5898	1.05893	0.97088	0.848459	62.9877	55.6287	60.9589	43.0742	41.6629	47.4386	40.8479	40.4673	40.7388
EVM0021481	88.0997	95.6107	90.4217	52.4264	52.2769	47.7204	578.371	561.979	572.195	84.1737	78.5052	79.8506	481.335	505.681	507.557	643.072	591.525	703.103	288.872	309.835	308.392
EVM0022169	12.9002	13.7409	10.8607	12.023	11.9302	9.01958	14.5861	13.4816	15.5033	14.5156	11.9777	12.8681	9.26162	11.0016	9.81637	8.56588	8.71699	10.196	8.66281	5.6011	8.75598
EVM0017168	0.226631	0.480788	0.0741486	0.877944	3.33945	3.41746	3.18977	3.57158	2.58653	0.138203	0	0.0711859	1.7948	2.9611	1.90539	3.10421	3.79333	2.68236	2.03689	1.21321	2.30352
EVM0025647	0	0	0	0	0	0	0	0	0.116844	0	0	0	0.162156	0	0	0	0	0	0	0	0
EVM0018453	9.66123	11.9891	11.9686	10.8101	8.89176	9.17933	16.1503	15.312	15.701	14.9291	16.2695	13.6559	10.4616	12.1329	12.5762	11.8288	12.0295	12.7893	11.2003	12.5725	10.983
EVM0000297	4.52789	4.38218	4.63892	3.96904	2.98696	3.29541	26.546	28.6863	27.1586	62.8521	62.2957	64.4054	35.6405	43.0532	44.1812	56.1969	55.8876	55.7663	71.8004	77.8206	72.8432
EVM0022125	52.389	49.365	43.4342	29.6927	22.5993	27.6151	25.8789	25.4659	28.1136	38.5464	37.5708	36.476	31.0619	30.0583	29.4301	30.1668	32.1765	30.238	18.9766	18.3671	23.4458
EVM0023172	17.375	13.8012	14.3572	48.4469	49.4584	46.9297	21.308	19.7526	25.6715	21.2157	17.4942	19.6473	21.2269	19.9565	24.0308	25.0776	28.9543	25.8255	35.5903	32.4464	33.1193
EVM0015631	2.17026	3.23728	3.12871	2.56162	1.79884	1.81581	1.59093	1.81497	1.67708	2.79167	3.56288	2.81197	3.67022	3.54452	4.50158	3.74785	3.40554	3.85303	2.08989	3.77026	3.39158
EVM0014937	0.201033	0.319863	1.08527	0.486739	0.691196	0.7424	147.794	162.743	158.504	0.36778	0.819391	0.189437	107.598	88.2556	89.8019	106.393	114.452	123.491	114.475	80.9621	111.322
EVM0012238	148.827	160.783	161.116	40.2124	38.4542	38.4493	14.7861	13.5549	14.6304	44.0437	44.1783	45.7848	17.4153	16.1772	15.5231	12.4933	10.608	13.0557	8.18945	7.72503	8.61862
EVM0008425	1.31093	1.85406	2.4509	2.84149	3.12749	3.28507	0.410022	0.389803	0.118743	3.36901	2.60093	2.47062	0.988751	0.815633	0.745822	0.796083	0.508315	0.886625	2.56484	2.46778	2.36035
EVM0003224	163.009	166.949	163.388	209.008	210.738	191.244	107.284	107.307	104.881	241.063	220.918	235.64	54.2363	56.8724	54.8174	41.6295	44.0061	35.7667	52.3242	56.6998	55.8985
EVM0020633	10.1911	11.8733	10.3637	17.0861	20.8759	18.108	6.86618	8.88229	9.59726	7.5799	8.5951	6.5491	15.6565	14.6252	14.194	22.2523	19.4083	20.5489	11.5405	10.5259	10.9223
EVM0009541	3.07315	3.1563	2.25033	4.72423	5.84613	5.89962	3.43284	3.22004	2.87643	1.02627	0.706925	0.827393	4.76453	3.8241	3.75581	3.73244	4.23686	4.22622	1.87895	2.16941	2.14191
EVM0026135	0	0	0	0	0	0	0	0	0	0	0	0	0	0	0	0	0	0	0	0	0
EVM0017978	6.66716	5.87195	6.50439	11.8573	14.1707	10.3708	3.94312	4.86606	5.26497	7.7249	8.49093	9.17636	17.3868	18.2142	14.8583	13.5122	15.0255	15.5527	14.6823	16.0235	14.9826
EVM0000817	0	0	0	0.0885645	0	0	1.88775	2.28411	3.82686	0	0	0	0	0	0	0	0	0	0	0	0
EVM0024007	0	0	0	0.186231	0	0.0887652	0	0	0	0	0	0.1812	0	0	0.127634	0	0	0	0	0	0
EVM0007373	12.9414	9.40576	11.4087	3.0173	5.76792	3.42949	0.112436	0.427567	0.56983	0	0.217069	0.677493	0.790811	0.313128	0.159071	0.848952	0.813109	1.02115	0.615415	0.740157	0.876928
EVM0014653	0.0931993	0	0	0.180522	0	0	0.174901	0	0.531842	0	0	0	0	0	0	0.132059	0	0.132371	0	0	0.113676
EVM0021551	11.8324	9.62057	11.7674	18.2239	20.7892	21.3187	20.4932	19.7616	20.7225	20.5024	18.2712	15.1284	16.5121	16.6858	15.7766	16.4705	14.3603	15.0287	13.7199	13.6514	12.3976
EVM0012567	5.31332	8.98237	6.43752	0.321613	0.652441	0.613177	9.03635	4.88783	6.07988	1.89852	0.902355	0.860547	18.2999	15.1862	16.862	26.3505	25.1254	27.8277	18.3343	18.461	18.5307
EVM0022816	5.51367	5.80551	5.45165	7.93125	6.09339	6.10098	10.6515	10.8857	10.9892	3.15218	2.90095	3.13265	9.95315	9.6407	11.5711	10.7424	10.784	9.09785	23.3722	23.1889	20.3235
EVM0011009	1.4147	1.37557	1.21501	8.50606	7.35399	7.891	3.65046	3.8911	1.90612	9.97506	9.50352	9.55386	5.67966	8.62595	7.19903	8.85351	9.43969	8.0372	4.38968	5.8256	4.17001
EVM0001111	0	0	0	0.177129	0	0	0	0	0.260922	0.250947	0	0.430862	0	0.119483	0.242792	0.388731	0.248212	0.129883	0.117415	0.112971	0.111539
add_RNAAddG013881	74.0236	65.0618	72.9654	18.5825	18.9517	21.3928	6.09967	9.54008	5.48462	13.523	15.1948	11.4609	6.50442	5.89072	8.07283	6.83406	7.68388	4.76535	4.57715	5.31062	2.81348
EVM0012415	0.829262	1.75925	0.596896	6.69266	9.66688	9.6976	3.06057	2.56443	1.89287	1.26424	1.1517	0.729332	1.09455	0.866796	0.733894	1.3317	1.57558	1.64892	1.41965	1.09274	1.41604
EVM0004375	32.7748	31.0533	28.0367	29.6199	30.2399	26.5289	20.0749	19.5164	22.8916	21.0796	19.0433	20.2677	25.1974	22.2292	24.058	25.518	24.5565	25.4166	20.5658	17.5382	18.4263
EVM0023866	0	0	0	0	0	0	0	0	0	0	0	0	0.097887	0	0	0	0	0	0	0	0
EVM0027104	2.66576	2.56256	3.35243	7.50311	7.44693	5.84513	1.64149	2.08073	2.61459	3.12424	3.77269	5.02397	3.29866	3.26533	2.32232	3.3051	4.52222	3.66785	6.63152	4.93979	4.0643
EVM0021868	161.478	172.664	169.158	86.1577	76.1204	81.9208	113.836	106.789	101.271	58.4955	61.7326	65.3777	48.8672	54.2701	46.5076	58.5296	64.5711	56.8208	63.545	64.7311	56.913
EVM0023592	20.0734	18.4091	21.3446	20.9593	21.9785	21.0419	14.0283	13.7095	16.1084	7.07686	4.54539	5.41849	16.9734	17.2117	15.1279	15.9992	17.8777	14.9975	14.0948	13.1739	11.0941
EVM0018536	14.4035	15.0575	13.6472	7.86168	7.11553	5.80336	13.9447	14.4825	14.9263	12.8706	13.6493	13.5727	19.3411	18.9825	18.2364	20.1142	21.4118	20.9303	17.0504	18.1536	18.025
EVM0015236	47.5815	52.2713	45.9626	8.52233	6.48332	9.69101	3.36176	3.42026	1.5543	48.986	48.5057	48.2129	2.90373	4.43477	3.67136	2.22658	2.55909	1.07128	0.322815	0.854145	0.536656
EVM0024941	0	0	0	1.0824	1.16249	0.48557	0.493504	1.46615	1.18802	2.64602	2.97737	2.84974	0.694204	1.11668	1.22183	1.02471	0.713778	1.02713	1.51941	2.27408	2.40563
EVM0016888	0.0992858	0.210631	0.292357	0	0	0	189.118	224.253	210.955	0.999009	0.0899286	0.0935586	82.2986	78.7428	78.1582	70.9045	75.1871	77.8406	65.2691	68.4412	64.0617
EVM0023863	14.9579	16.1264	16.6072	6.79197	7.70827	10.2327	5.79818	2.97486	2.84525	2.33273	2.44312	3.18873	11.3928	12.6233	13.2811	2.84912	4.05997	3.34343	0.440778	0.545269	0.538356
EVM0011454	10.4183	7.218	9.44286	4.13593	3.36537	2.46961	4.40345	6.19573	5.80238	66.1081	65.0349	64.6087	5.63678	5.21192	5.66915	5.78521	6.05047	5.99883	5.36272	6.08737	6.23916
EVM0020942	6.62054	6.13687	5.59087	3.72579	3.66198	4.51538	78.9672	81.3779	77.4322	2.86431	2.70117	2.7821	63.6891	71.1113	68.0533	138.771	139.267	141.132	32.7001	30.9837	29.3905
EVM0009579	10.53	12.7799	11.9219	11.4787	8.32338	10.8068	21.645	21.8883	24.5015	8.064	7.71877	6.7381	26.4397	30.396	26.2665	45.5942	54.7028	43.9628	22.0093	23.5966	22.8195
EVM0000175	4.07414	4.32157	3.64607	2.0889	1.53026	0.663771	1.2368	1.81716	2.96312	1.09609	0.759742	0.564578	2.37243	2.66159	4.2949	4.75413	4.22817	3.9144	4.3079	4.88503	3.80002
EVM0008009	44.8184	38.18	37.0389	31.261	27.7737	33.6596	35.6259	33.9727	33.626	32.4998	32.0234	34.4648	45.8999	43.6915	42.4642	29.5318	27.1819	28.0348	25.8654	25.3169	23.2965
EVM0022443	30.4793	31.2017	32.4966	28.8517	28.435	30.0462	66.5651	66.5765	67.7982	79.3753	80.7512	86.3993	39.7344	45.5886	42.4966	64.0279	69.1388	58.5789	60.5494	66.2603	63.779
EVM0021988	164.146	159.923	162.241	96.4786	93.9178	93.489	26.9017	28.269	27.9585	80.3891	74.6843	75.7178	40.7686	42.2546	40.8505	30.6036	30.1935	31.1102	37.2039	40.3767	41.9164
EVM0009192	3.44547	2.5583	2.29966	3.27011	2.09848	2.41753	15.7121	14.8758	15.4016	1.89099	2.99592	0.779213	30.5607	34.4836	35.0356	33.784	36.753	35.4297	42.2919	41.8832	37.3179
EVM0015102	26.1218	22.9191	27.4482	11.7791	12.0383	12.7175	14.2654	14.7948	14.1527	8.68113	8.17873	7.42355	22.9248	23.4757	22.9342	18.6699	18.2568	21.6584	11.8304	12.8056	13.9356
EVM0014408	2.81696	3.66456	3.02578	3.75764	2.76723	4.7107	0.398973	0.474123	0.606602	0.0972352	0.0481409	0.100168	3.50768	3.40279	3.8806	4.06681	3.02953	4.07641	1.70606	1.44452	2.20414
EVM0020323	11.5692	12.9304	12.351	9.34042	9.08794	9.38175	12.2926	11.3726	10.6096	11.3967	10.7976	11.7405	7.43031	8.8425	8.07741	11.5543	9.88682	10.4058	7.36076	7.84923	7.52253
EVM0021893	23.5786	29.2028	26.5661	15.9029	13.1739	13.3413	28.0829	31.5989	28.9073	20.1353	24.2601	20.9848	19.9296	19.1367	18.1923	26.128	24.1614	27.1803	23.2828	22.1145	22.6699
EVM0026663	0	0	0	0	0	0	2.58017	2.83031	3.31939	0	0	0	2.51272	2.62551	1.40397	2.09802	1.57885	1.95276	0.814756	0.522615	1.16098
EVM0020924	127.372	129.485	124.868	99.6321	100.756	101.914	194.363	178.397	178.653	371.326	393.742	382.624	263.829	263.719	275.25	174.501	176.841	176.447	175.368	182.591	166.278
EVM0017736	332.355	357.369	350.094	371.136	394.087	403.997	7.68956	10.9075	7.29932	134.694	139.264	131.77	11.5036	11.7272	12.6057	15.667	17.3005	16.0735	19.207	21.212	27.1308
EVM0004809	0.54165	1.30578	1.01497	0	0	0	1.15509	1.75701	1.5923	0	0	0	0.779926	0.257348	0.849772	0.558177	0.133653	0.279747	0.0632233	0.0608307	0.120119
EVM0008842	3.39298	4.48495	3.4328	0.353878	0.307669	0.481923	0.146939	0.139693	0.198585	0.620727	0.520081	0.787016	0.275596	0.409217	0.138589	0.295858	0.283367	0.593113	0.201066	0.128972	0.0636682
EVM0007340	50.5267	52.0077	51.6922	54.5933	55.3754	51.4836	28.9876	30.0057	30.9071	68.2839	62.2892	65.7436	34.239	38.6884	33.1112	38.17	37.0904	34.5657	26.4895	23.3741	26.0766
EVM0020736	2.10043	1.20948	1.3548	5.92829	5.06996	4.70945	2.08349	4.4433	3.59584	1.42726	1.79376	2.60133	7.68349	7.68426	10.0379	11.0545	10.7507	10.6544	9.70873	7.56202	6.58778
EVM0020793	37.3499	39.145	41.593	11.5487	12.0647	11.8053	14.091	16.2345	13.8867	20.0746	22.0864	21.2125	10.2444	12.0836	12.0402	16.5174	17.9993	16.852	6.14719	7.86159	7.47176
EVM0004520	12.5448	12.3182	12.0317	1.87447	4.7181	2.97817	25.6945	27.6247	29.7257	0.655717	0.973932	1.28344	30.7508	36.528	31.4983	39.817	38.9142	38.3838	17.7638	15.9403	17.3994
EVM0026727	0	0	0	0	0	0	21.9075	29.6424	29.0222	0.794667	0	0	17.0568	17.3101	14.7041	14.1563	13.1165	16.8117	5.99549	8.58582	9.53659
EVM0020445	27.3151	28.187	23.8317	10.9735	11.3295	9.52684	0.189853	0.180491	0.769745	4.01005	3.48203	5.4021	0.712169	0.881216	0.626726	1.62462	1.18991	1.82004	0.86596	0.74987	0.411313
EVM0023360	112.318	110.658	126.812	3.44154	4.73757	4.10095	0	0	0	25.0755	27.3586	22.8421	1.00509	0	0.336953	1.25881	0.172238	0.360509	0	0	0.154797
EVM0005203	10.9064	10.9838	13.4114	2.90768	1.32419	2.3193	0.459941	0.546575	0.582749	1.23303	1.05445	0.635114	1.05136	0.560397	1.46409	1.12866	0.748388	1.47942	0.629366	0.908323	0.896808
EVM0022018	59.6523	72.187	64.0289	14.007	14.2077	13.4635	5.2932	3.26556	5.59352	5.65416	7.71862	4.1282	25.9813	27.5222	29.3171	24.1499	24.6777	24.2069	13.022	11.5654	13.6879
EVM0025864	201.534	217.029	203.28	9.24713	6.02974	4.40757	2.98639	4.36008	4.75675	7.38223	6.89803	5.89113	6.15133	3.11884	6.03576	4.83189	3.70231	4.84329	2.62702	2.24676	5.2684
EVM0017014	21.7565	21.9683	20.9784	18.5381	17.2967	16.3845	8.01532	7.06021	6.89743	6.63374	5.30549	6.40673	6.44287	6.01332	6.75757	4.94039	4.77912	5.15013	4.83481	5.34101	5.9112
EVM0022633	0.146536	0	0.0719152	0.0709583	0	0	0	0.0653585	0.0696841	0.13404	0.199089	0.138083	0.0967077	0.0957305	0	0.103818	0.198869	0.520313	0	0	0
EVM0013166	27.7277	25.2902	28.5678	21.8591	21.6171	20.8706	27.0448	29.3031	29.1597	27.1402	32.6009	26.4944	29.3718	28.2904	29.5405	30.1298	30.0562	34.1642	24.9889	22.385	26.151
EVM0021367	23.4312	27.6308	28.7638	31.2872	29.8539	35.5431	30.9719	28.1916	29.6324	16.0018	17.1171	19.0113	32.8654	28.6126	30.5962	31.8439	29.1998	29.9242	40.3315	42.2756	38.469
EVM0021489	8.29997	10.0617	9.27526	13.3624	12.6008	16.2544	26.2971	26.7632	23.8869	6.04745	7.06212	6.80545	14.4647	14.6472	14.7863	25.7615	21.9919	22.6073	13.9323	14.6035	14.4622
EVM0003485	0.231667	0.163824	0	0	0.0758592	0	0.072459	0.137772	0.440669	0	0	0	0	0.100897	0	0	0	0.109679	0.0991502	0.095398	0.0941886
EVM0009368	2.1232	2.75261	2.85584	0	0	0.363	1.91844	1.89399	1.12185	0	0	0	2.17967	2.26039	1.87902	2.00565	2.02769	1.67532	2.01933	1.94291	2.68559
EVM0005121	0.389408	0.165223	0.0764435	0.754264	1.22411	0.790929	1.90002	1.66737	1.40737	0.427441	0.282167	0.880669	0.925173	1.32286	0.620324	1.43461	0.95126	1.21677	1.49995	1.44319	1.80486
EVM0028084	39.7353	42.86	39.69	39.7821	42.3291	37.6421	47.8429	49.8361	46.4056	38.1878	41.8461	39.2823	35.3002	36.617	34.8147	38.7597	35.4678	41.9263	33.9862	33.0014	35.5214
EVM0014118	5.54454	3.68321	6.10181	6.61726	5.61172	8.16953	1.89183	3.14744	1.54471	1.43442	1.21745	2.05822	2.29159	2.48796	2.3791	1.26971	2.35621	1.59089	0.862903	1.6605	0.956343
EVM0001549	10.6579	12.3176	16.1601	0.924353	1.40639	0.734308	11.0827	10.3588	10.0988	28.8834	27.7718	30.6541	8.76598	7.11859	7.6021	7.88901	7.87976	8.35949	8.78249	9.82573	9.02208
EVM0027490	19.553	20.5006	17.4169	1.82433	2.88672	2.57387	2.05032	1.31068	2.22154	3.82523	4.50432	4.65064	4.27651	4.0364	3.85095	2.18869	1.84064	2.08684	1.35442	1.58241	1.4245
EVM0005851	8.30999	8.20675	6.56274	0	0	0.264553	2.15101	2.13014	1.18098	0.262115	0.605606	0.0900073	0.504298	0.249601	0	0.40603	0.259258	0.135663	0.49056	0.353996	0
EVM0019297	0	0.265547	0.12286	0.484902	1.10666	0.231125	0.117451	0	0.238097	0	0.113375	0.235902	0.660863	0.490639	0.664658	0.532088	0.169874	0.177781	0.803576	1.08243	0.763364
EVM0007535	0	0	0	0	0	0	0	0	0	0	0	0	0	0	0.430551	0.459566	1.32049	0.460651	0.416431	0.400671	0
EVM0008712	0.323615	0	0	0	0	0	0	0	0	0.0493363	0	0	0	0	0	0	0	0	0	0	0
EVM0015154	0	0.0549765	0.0508719	12.2978	9.21544	11.0533	2.91791	3.55999	4.09137	9.29218	6.66608	8.05846	6.08846	6.29781	7.56828	4.62667	4.85336	5.22649	1.92984	1.98486	1.70683
EVM0009542	1.38898	1.7	0.838976	9.10594	9.02647	11.6398	25.8656	27.926	29.3677	5.86401	4.35489	10.5716	30.4616	38.2507	32.0549	52.8366	47.4158	53.8719	17.0109	19.5349	20.8511
EVM0014370	88.8279	91.2453	96.0136	51.2944	54.6332	55.1363	66.8643	75.622	77.0676	87.9091	85.07	86.7406	60.9895	69.5412	70.5855	61.4964	64.8959	59.8698	28.6296	32.4261	32.5222
EVM0019043	18.0535	19.4959	19.7483	0.315981	0	0.30122	2.14299	0.77612	1.03436	0.198963	0	0	0.574193	0.284195	0.144373	0.154102	0.147596	0.463397	0	0	0
EVM0014533	24.5173	22.3348	25.5745	0.372461	0.283348	0.0887652	3.33798	2.57301	3.65773	0.439736	0	0	7.6143	8.66796	10.5936	5.8581	7.56802	7.78372	2.09861	2.85063	3.28357
EVM0023640	34.9619	34.6803	35.481	8.10581	9.32513	9.93768	12.6052	11.9647	12.4341	17.1144	18.2517	18.1498	10.432	10.7695	8.32599	12.4599	12.509	12.9709	9.08675	9.8161	8.76126
EVM0023228	20.8219	22.0445	21.6954	16.5372	16.8322	15.9831	23.6263	22.3381	23.6665	14.6093	16.3056	14.2139	21.7054	24.1654	21.6991	25.7039	25.9834	28.341	17.0887	18.342	20.2018
EVM0002021	102.497	94.2051	95.3755	2.13018	1.72855	1.66965	7.4757	9.46152	9.80879	0.40239	0.221358	0.552704	16.9029	19.2228	19.5954	11.7046	12.4708	11.038	11.2963	10.5669	10.3734
EVM0002505	4.72762	4.62898	4.79897	3.40459	4.96172	3.50667	0	0.0720897	0	0.147845	0.146395	0.0761523	0	0.0527949	0.10728	0	0	0	0	0.0998351	0
EVM0025544	103.084	116.09	111.032	156.486	153.384	157.168	1.07833	1.94779	1.56663	0.87601	0.936815	1.04682	3.53935	3.90399	3.76308	2.55113	2.59939	2.77479	1.08206	2.08223	1.44843
EVM0019168	8.8779	7.88094	8.15776	0.975662	0.865934	0.871952	0.11816	0.224666	0.119768	0.172783	0.0570298	0.237327	0.0831068	0	0.167168	0.356867	0.341801	0.178855	0.242529	0.233351	0
EVM0010694	9.2119	8.56186	9.10071	19.2088	21.0757	18.2283	3.91359	3.7206	5.07983	10.3202	10.0831	11.5081	3.64372	3.72451	3.74431	4.6344	4.15368	4.68796	5.58637	4.2629	4.83104
EVM0026717	25.5548	23.2716	26.0727	14.5541	13.4338	14.9869	0.230784	0.329105	0.491241	2.18232	1.96043	2.34086	0.324641	0.353496	0.163252	0.278806	0.333794	0.244532	0	0.0607692	0.0899982
EVM0002359	0	0	0	4.26852	6.12339	5.28984	0.17724	0.393166	0.479071	1.43986	0.969506	0.65265	0.914175	0.904938	0.919425	1.51669	1.62355	2.32511	0.5659	1.08897	0.844771
EVM0027666	33.3715	31.2044	31.5714	373.361	389.374	375.469	61.7458	76.3351	72.2733	174.573	171.222	174.661	65.2753	63.1273	69.1194	59.2498	61.4773	51.7756	74.9403	80.2999	66.041
EVM0019411	0	0	0	0	0.167102	0	0.399031	0.531095	0.161784	0.155599	0	0.160293	0.112262	0.333383	0.564534	0	0.115427	0.1208	0.546019	0.210142	0
EVM0026409	0	0	0	0.179833	0	0	1.30675	0.911027	0.353208	0	0.168187	0	0.122546	0.242615	0.739496	0.394665	0.252002	0.395597	0	0.229392	0.226484
EVM0000856	1559.24	1527.17	1571.65	567.571	631.879	597.585	251.311	245.56	244.781	984.43	988.614	948.263	236.609	255.015	259.183	133.595	130.046	126.162	111.167	130.192	118.678
EVM0024993	0	0	0.0723511	0.0713884	0.0724111	0	0.207496	0.263018	0.280426	0	0	0	0.681056	0.385243	1.27208	0	0	0.104693	1.41965	0.910617	0.629351
EVM0026541	278.191	286.234	274.349	124.113	116.774	111.2	290.674	319.75	310.664	144.019	138.789	144.392	190.057	189.805	192.618	224.3	223.728	237.468	107.418	109.822	106.093
EVM0014897	115.096	105.622	105.124	42.0153	40.918	45.1885	11.7559	13.8451	11.2489	67.2224	67.9606	70.5717	24.6201	22.4168	24.6374	22.9194	20.4925	20.8488	15.7262	16.5171	15.8516
EVM0022068	9.03716	7.06967	7.02231	17.9786	15.8318	17.3125	13.4262	17.03	15.9009	31.9294	36.8004	34.4183	7.70368	8.16702	6.79817	8.10999	7.05215	8.87787	6.0434	7.86147	5.97062
EVM0007060	4.52386	4.40527	4.07637	6.53595	5.82821	6.16215	22.6158	22.0298	22.7824	11.261	13.9718	13.9069	22.3182	20.1548	21.9542	18.81	24.6585	15.7998	8.8555	8.61199	5.60824
EVM0018729	10.6719	12.1172	11.8027	64.1238	57.9549	66.6096	6.62876	9.98914	7.50521	5.98087	4.49273	4.60326	8.72939	8.54298	8.57998	7.77381	8.46555	6.51126	3.37733	2.22825	3.57499
EVM0009835	2.04278	2.58177	2.85828	12.0387	12.8516	11.9578	8.72744	7.36655	7.56473	10.4958	10.2355	10.6486	10.4983	9.88116	8.19303	7.94455	8.78884	10.1856	4.96666	5.95996	5.77838
EVM0017861	3.10973	3.18863	3.56103	9.43665	8.80813	10.0006	1.26443	1.98805	2.21821	1.28005	1.64305	1.56285	0.957736	1.42209	1.30725	2.12974	2.03982	2.87089	0.865099	1.02444	1.2011
EVM0028008	0.358072	0.455781	0.492044	3.0517	2.81401	3.10748	0.873561	0.766599	1.226	1.96522	1.2973	1.41715	0.850724	1.02927	0.760541	1.11622	1.45785	1.62742	1.4712	1.7694	1.57227
EVM0024760	25.6532	30.5995	29.0583	14.1285	12.6811	13.5293	25.2759	23.5889	23.3961	15.2421	13.2434	13.871	34.2513	36.7019	31.4316	28.4636	28.2898	27.3615	14.7987	13.425	15.5041
EVM0013018	2.28493	1.66629	1.4718	7.33023	8.55754	7.3174	0.736997	1.01913	0.882847	4.63737	3.94516	7.3341	0.37699	0.37318	0.189577	0.404706	0.19381	0.405661	0.4584	0.0882105	0.348369
EVM0027759	5.26571	5.38339	6.4946	6.37463	5.01962	5.32522	6.98877	6.14968	7.26507	4.99095	5.1146	5.09254	7.22463	7.85322	7.08217	8.81117	7.73394	9.59461	7.89518	9.09428	8.55645
EVM0013982	82.9162	94.552	87.0228	66.6451	78.4867	78.5903	145.723	136.533	143.118	85.3092	89.5751	83.6844	84.9004	93.4714	93.2571	107.211	106.882	90.1546	50.914	58.4026	47.6477
EVM0009470	57.5648	56.7369	55.77	19.6425	21.2912	19.5051	9.37549	12.0616	10.1177	19.1889	17.1998	18.4093	29.5261	30.1371	30.0916	25.4984	22.7353	20.3339	40.785	44.7685	43.7765
EVM0014752	79.6814	95.5998	89.0127	34.5339	35.3729	32.3381	37.3832	38.6038	34.336	31.805	35.0488	33.8874	25.9693	24.1498	20.7831	31.6862	29.9996	32.3584	23.3417	23.1801	21.9742
EVM0000973	98.4412	107.455	103.308	59.255	55.1753	57.9249	71.125	68.0538	68.8886	68.2431	69.1653	69.5336	62.4687	63.3284	58.9803	83.7947	77.8233	95.1829	63.5576	63.7927	62.4317
EVM0006910	14.9988	17.6843	15.6278	5.47518	6.517	5.05962	71.3426	64.4795	58.5968	101.579	110.615	98.8267	73.5541	74.9213	67.0077	60.7336	60.753	66.5304	28.3683	28.0074	25.8933
EVM0018191	1.48006	2.09326	2.42121	0.955599	2.62516	1.51826	4.35917	3.41072	4.18387	0.714528	0.446856	0.426153	2.44194	2.95443	2.29223	2.79623	2.51079	3.09479	3.32558	3.19973	3.76091
EVM0024107	22.7696	21.4026	19.9319	28.6631	31.9175	30.9939	34.095	27.1334	31.6002	47.3469	50.2873	51.0958	45.9648	54.3633	48.3509	60.0578	60.3954	56.579	43.7696	44.1948	39.5241
EVM0015979	13.107	14.3038	14.2057	12.3561	11.1342	11.8325	14.671	16.3067	15.7827	14.7274	11.8191	12.6522	17.2618	14.847	15.2776	16.4307	15.3426	17.295	12.7243	12.8531	15.1006
EVM0009288	6.00641	6.25209	4.57315	3.75118	2.15061	3.00586	1.58016	1.20179	1.49488	0.102695	0	0.793449	7.48339	6.38095	5.58888	4.37471	4.34238	4.06613	2.37846	2.98192	2.46484
EVM0026356	26.5773	28.3962	29.6238	40.4477	46.8431	39.984	26.8098	29.5635	31.2753	39.1447	39.6935	40.2042	55.3802	52.046	54.0751	45.8654	45.0643	47.2533	49.9056	48.335	48.5856
EVM0016128	89.1657	91.8784	95.4486	113.3	109.226	111.287	151.825	164.671	158.896	101.86	105.993	108.344	102.427	113.918	109.111	123.494	110.182	124.642	80.7851	85.0162	86.6368
EVM0006652	202.655	215.924	201.898	281.045	302.678	290.324	131.692	143.946	151.647	294.382	285.456	267.271	133.92	127.269	128.032	112.926	105.48	125.012	115.683	119.938	116.465
EVM0018416	0	0	0	0	0.0585678	0.110086	0.839139	1.43596	1.41759	0	0.216005	0.112362	0	0.0778983	0	0	0	0.0846785	0	0	0
EVM0007065	0	0	0	0	0	0	0	0	0	0	0	0	0	0	0	0	0	0	0	0	0
EVM0015077	18.1073	19.3035	24.382	0.881228	1.16201	1.17608	0.0853787	0.405842	0.432702	1.58141	1.15382	1.88634	1.20101	2.49663	2.05344	2.83647	2.34626	2.06776	0.584145	0.562039	1.33179
EVM0023927	22.5732	25.7911	23.5237	21.2483	22.0814	21.1033	32.2614	35.4433	34.8382	28.5542	29.5073	28.1924	32.3437	32.1824	27.192	33.6899	32.0956	32.0607	26.7473	28.7075	29.1159
EVM0015464	63.2046	64.1154	64.1506	80.6716	83.1287	78.8394	107.838	109.463	108.781	69.8321	69.4974	71.8865	106.303	99.0259	101.051	92.452	90.1968	86.6334	84.2705	86.0595	89.6141
EVM0019451	5.48599	5.87977	3.87024	9.29782	9.88011	9.12725	7.50691	5.76035	5.70678	1.67272	1.96688	1.18468	8.14616	7.54119	8.87569	3.31989	5.04102	6.81778	9.90531	11.8601	12.6159
EVM0001180	0	0	0	0.506627	0.0856475	0.804932	3.68138	4.58868	2.23888	0	0	0	0	0	0	0.617696	0.473294	0.123831	0	0	0.106342
EVM0022312	10.8509	8.34744	11.8755	10.7774	8.44578	8.80167	15.061	13.4833	14.6394	70.6525	75.4234	71.5096	8.92283	10.5086	9.84847	10.5613	8.93918	8.86288	8.8133	10.4498	9.59851
EVM0012219	0.525001	0.185628	0	0	0.171911	0.0807827	4.59776	3.12216	3.66167	0.160077	0	0	9.81687	8.68875	9.9894	5.57926	5.10621	4.7225	51.6794	54.1555	53.1488
EVM0026933	23.0617	28.3968	25.406	29.7536	29.3481	30.8947	18.0453	20.644	22.1254	23.0497	21.3265	24.9988	25.2244	26.5498	25.4227	28.5071	29.1639	26.7992	20.603	22.6125	18.2934
EVM0018051	40.9124	43.73	47.7068	59.0823	53.105	53.2424	11.3601	10.1523	10.5816	10.2309	11.1614	12.1851	14.711	13.9727	13.8838	15.6257	13.4481	17.2233	11.035	10.9568	11.7991
EVM0019530	12.9195	11.0275	9.60979	0.684262	0.297456	0.838666	0.0947078	0.0900374	0	0.646285	0.274264	1.23645	0	0.131878	0.133989	0.429055	0.13698	0	0	0.12469	0.369329
EVM0027577	8.25982	5.27387	8.57957	4.81519	5.04172	6.58921	0.300983	0.929958	1.14404	0.880246	1.8885	2.34256	7.62099	8.69653	9.58094	3.97701	5.8769	5.46706	5.56004	3.96268	4.49932
EVM0026893	79.589	74.2823	75.1735	9.41968	7.5891	9.64668	0.0521506	0.396631	0.15858	18.6072	19.0288	20.792	2.27414	2.17854	2.72988	0.86628	1.05599	1.4209	0.713609	0.343302	0.610109
EVM0011048	0	0	0	0.119889	0.304016	0.228576	0	0.165641	0.176604	0.22647	0.112125	0.408277	0	0.0808715	0.164332	0.175407	0.252002	0.175821	0.0794715	0.305856	0.150989
EVM0002273	1.17229	1.03624	0.862983	0.662278	0.287899	0.450956	0.458325	0.784302	0.464561	0.536161	1.41574	0.920556	1.41838	2.04225	1.55621	0.692117	0.530317	1.11	0.250862	1.20684	0.119154
EVM0024496	2.3499	1.99409	2.13876	11.0481	12.9691	11.8731	0.48108	1.21962	0.731438	3.6737	3.1346	4.30791	0.620333	0.390769	0.340307	0.6054	0.811776	1.33502	0.274288	0.580598	0.573238
EVM0010450	35.827	31.7811	34.8543	8.44409	7.37114	7.4154	27.3697	28.3768	28.3451	15.3708	15.2201	13.9921	15.3444	15.7417	13.6788	16.2479	13.9842	15.8359	11.3305	12.4684	12.1814
EVM0019585	0.310973	0	0	3.41326	3.86947	3.5409	0.389055	0	0	0.0948182	0.281666	0	0.410458	0	0.137605	0.146878	0.422031	0	0.133092	0	0
EVM0021514	8.52405	9.6554	8.66951	52.595	49.2185	52.2388	14.9831	17.3409	16.3609	21.5921	18.8301	20.3898	29.2221	31.9001	33.7932	43.1754	45.5925	47.7146	42.0943	43.2649	45.0686
EVM0015156	65.2791	73.0232	72.4968	54.6038	53.8532	51.0406	52.2703	53.6237	50.7756	58.5165	56.1476	60.0233	76.2273	73.0603	69.8635	69.1341	67.9894	77.9519	53.5759	51.3661	54.8554
EVM0027712	0.403786	0.428308	0.39633	2.06193	1.73087	1.93172	1.13664	2.03019	1.50122	9.2338	11.5039	9.82365	2.85862	3.98081	3.75216	4.73321	4.28428	4.64011	3.0164	3.35572	3.67136
EVM0021177	11.9927	13.3766	11.6893	9.01023	8.81114	8.40425	9.88943	9.90834	9.65861	12.5895	13.6159	12.5286	9.47996	9.20958	8.64748	11.1946	12.3314	11.6955	11.0232	10.9568	10.3697
EVM0012789	0.369962	0.39243	0.363131	0.537449	0.090858	0.512341	1.38857	1.32009	0.879662	0.592223	0.418869	1.22017	6.22606	6.64653	6.9985	3.27637	3.13805	2.23319	1.66256	1.7139	2.36904
EVM0025253	9.10849	9.09332	6.8367	0.10378	0	0	0	0	0	0	0	0	0	0	0.142253	0	0	0	0	0.13238	0
EVM0025950	22.6219	25.692	25.4582	31.8054	31.8013	30.0675	2.19584	2.853	1.5951	40.1011	40.3085	37.4517	5.14809	5.91145	4.50456	3.92387	2.69956	3.15759	2.15338	1.54187	2.04562
EVM0014303	13.4998	15.6705	13.688	15.6027	18.6411	16.1083	21.5698	27.8338	25.376	13.3387	12.5735	12.361	22.105	20.8833	22.8237	21.0233	18.9259	21.5252	18.4778	16.8345	18.0968
EVM0013364	3.69999	5.91722	5.47543	4.13462	3.13141	3.6787	0.587528	0.0507777	0.0541383	3.85308	4.38244	4.66662	11.8711	11.8255	9.52115	13.9537	13.7508	13.6632	13.0094	10.4778	10.4144
EVM0005269	7.03226	6.4124	5.69146	1.31432	2.30271	2.50584	0.289407	0	0.176007	1.35422	1.11746	1.04631	0.814208	0.967177	0.655107	1.2237	1.0046	0.876132	1.02964	1.14308	0.827633
EVM0017615	4.33581	6.01424	5.49974	21.0602	29.0286	22.9708	9.38853	14.1619	11.7367	4.4542	4.35011	6.34856	17.9611	18.8255	19.1269	22.4007	20.6402	20.1798	12.5043	12.1135	12.5295
EVM0009828	0	0	0	0	0.0704194	0	484.562	492.64	508.404	0.983575	0	0.202649	332.865	354.978	351.81	680.241	657.65	626.766	413.076	439.243	427.292
EVM0027052	29.2517	37.8361	36.4044	33.4994	31.4634	31.1653	34.9172	37.159	36.4488	14.677	15.2318	13.317	38.4062	41.6868	37.8484	44.8587	41.4991	47.1558	53.2864	57.2164	58.4857
EVM0016354	0	0	0	42.0882	42.0492	44.4459	123.661	132.283	133.838	1.04611	0.641245	1.12899	204.718	188.845	200.182	144.069	140.869	124.298	109.36	107.374	102.957
EVM0016693	0	0	0	0.526243	0.427026	0.100332	7.8008	7.80389	6.56328	4.67214	4.87242	6.29796	9.89745	11.6433	11.5412	12.9349	13.495	16.747	12.4185	12.4184	11.6645
EVM0006894	0	0	0	0	0.237899	0.0745274	1.51491	2.59236	2.14972	0	0.146233	0	0.426198	0.949257	0.321484	0.457533	0.219108	0.458613	1.65835	2.29367	1.08306
EVM0001149	0	0	0	0	0	0	0	0	0	0	0	0.162566	0	0	0	0	0	0	0	0	0
EVM0023613	3.64479	4.37042	5.44401	12.7383	10.9749	8.63191	6.76559	8.26966	7.61123	5.65326	4.44956	6.12245	7.00705	6.83272	5.15399	3.5927	4.94646	2.47581	8.34218	6.0688	8.21465
EVM0012294	0.0494411	0	0	9.91167	11.4621	13.1916	5.98449	5.77758	5.31355	37.1297	39.0047	37.3179	6.98261	7.88103	7.67903	6.58524	6.44141	6.46035	3.30098	3.72576	3.07549
EVM0027850	7.82205	8.10185	6.95501	3.47579	3.25439	3.18598	4.96499	4.92537	4.81374	1.17847	1.41697	2.21125	5.64807	5.23029	6.71887	4.69418	4.05888	3.725	3.6628	4.14945	5.61212
EVM0026296	20.6839	23.892	24.0878	16.5102	15.7778	14.8826	25.4722	22.3906	23.7325	16.1594	17.0944	16.8689	22.0934	21.37	19.8751	29.2664	27.0318	30.1509	21.6049	21.5875	20.8829
EVM0008352	0.0684569	0.145229	0	0.397793	1.00873	0.568813	0.513874	0.793866	1.49749	0.438334	0.310026	0.32254	10.5718	8.67609	8.3606	0.194001	0.650335	0.291688	4.04321	5.66616	4.59236
EVM0013490	86.4488	88.7482	84.7245	62.0875	62.9769	64.6041	23.5722	24.7361	26.1252	85.6366	86.0961	86.9911	49.6807	48.0429	52.9662	47.2362	43.3544	45.5575	40.7378	39.0887	37.639
EVM0026583	2.37962	2.52414	1.55712	0	0	0	0	0	0	0	0	0	0	0	0	0	0	0	0	0	0
EVM0027986	0	0.325239	0.902869	0	0	0	4.17172	6.97468	8.74857	0	0	0	39.4592	43.0666	36.0225	13.2511	16.6448	17.4196	1.3779	1.51514	2.05691
EVM0002135	3.60909	4.58552	3.50352	8.45021	8.64919	8.93422	0.669852	0.353788	0.792126	8.63422	6.39422	7.39977	1.15166	1.6064	1.36887	1.40492	1.83003	1.63356	0.967522	0.783922	0.822358
EVM0004441	1.68439	1.59353	1.65329	7.75964	10.3304	9.20439	30.0293	22.985	21.7785	33.4801	36.6567	34.4042	32.6277	31.5248	34.1446	28.5759	32.8681	32.7815	19.3473	24.8014	19.2675
EVM0021727	16.1387	14.6378	18.5956	15.8565	19.5301	22.6735	34.4563	49.2401	34.9251	14.3346	24.5747	16.7506	21.3017	23.2257	21.1136	34.7989	30.1554	28.5692	19.2199	22.2488	20.5404
EVM0014883	0.662483	1.5676	0.900347	15.6945	15.2185	14.3497	11.3804	12.7739	13.8617	33.1895	33.2795	33.8065	23.4748	24.7691	21.3096	24.4786	23.5835	24.2469	13.4133	13.0946	13.6123
EVM0016387	35.9871	37.5976	33.4398	27.3409	29.535	29.105	40.106	38.0167	35.2976	31.9265	31.1225	29.6281	17.3378	16.6177	14.9463	21.4486	20.9392	16.1096	21.8448	25.1908	22.4809
EVM0007238	45.7979	47.0743	49.2168	44.4399	46.9928	42.8959	3.66081	2.49156	2.65646	65.3732	63.407	64.2118	3.56961	2.54878	2.11875	1.38205	1.3237	2.26687	3.52929	2.68372	2.37932
EVM0021884	3.475	2.19745	2.62372	1.48857	1.83813	1.7892	72.4241	70.9987	75.634	11.9811	8.89774	9.82365	38.6342	39.2043	42.0497	36.456	34.1006	35.3081	64.9529	70.7504	66.5116
EVM0027502	0.38765	0.205596	0.285369	1.03243	1.23762	1.52103	0	0.518701	0	0.531888	0.0877789	0.639255	1.15125	0.886365	1.15786	0.549282	0.92066	1.10116	0.87102	1.67612	1.77307
EVM0027537	12.6265	13.9206	13.4668	13.4801	19.0449	19.2756	20.9899	23.6797	22.2211	13.6414	14.4082	17.1445	23.8834	22.6028	28.2439	33.9509	31.4381	27.5355	16.9778	18.0548	22.3127
EVM0001419	57.2234	62.3224	61.0421	29.2912	27.0038	27.9542	16.6316	20.0602	21.2261	0.902474	0.431406	0.577054	21.5992	23.7369	22.1297	22.8497	21.2848	20.536	20.8361	20.72	21.3288
EVM0001974	36.0608	36.6664	42.7252	8.05937	9.6421	8.27385	27.0291	31.7871	24.3528	7.41689	6.18456	10.0534	18.025	13.1033	11.6135	29.9323	33.881	23.9417	30.1364	30.0504	28.6284
EVM0007953	83.3021	86.7141	84.0676	19.4434	19.6509	16.6682	4.09961	2.99556	4.22408	40.5598	36.0413	36.4073	10.8188	11.0869	10.114	7.00946	7.25257	8.15427	4.31163	4.50532	4.40417
EVM0022041	22.8082	26.279	23.8759	10.0109	10.9821	10.2174	1.21239	0.801811	0.480868	18.8591	18.4707	20.5397	3.04015	3.74344	4.77285	2.38804	2.82091	4.06926	1.15408	1.66561	1.43893
EVM0016766	28.103	22.287	26.8685	17.3958	16.9288	17.9906	10.3239	7.98193	7.87981	19.2799	18.1303	21.4229	10.5857	9.26629	11.1744	10.8943	12.5033	11.2025	9.61649	10.7264	9.86285
EVM0021757	2.22054	1.92714	2.08047	0	0	0	0	0	0	0	0	0	0	0	0	0	0	0	0	0	0
EVM0013606	0.882576	0.591268	1.4134	3.55397	3.14857	3.25928	20.1803	25.7736	21.5594	49.416	53.0126	47.186	11.0361	10.7425	12.8261	10.7944	15.3819	13.129	11.3915	12.5672	12.9178
EVM0001987	0.800165	0.396088	0.942468	9.50593	10.2709	10.0468	13.7148	15.4653	15.5249	16.688	17.4907	16.2363	6.97059	4.4607	6.86899	4.83754	5.93641	4.09131	34.5884	33.6749	33.5733
EVM0016108	11.2306	7.97587	9.17817	0.0933613	0.331446	0.311499	0	0	0	0.176359	0.130973	0.0454198	0	0	0	0	0	0	0	0	0
EVM0012245	34.646	39.6367	40.3462	19.8782	17.8654	17.3956	46.4969	46.9631	44.8427	24.3434	26.7974	25.3867	29.0823	30.802	25.4336	35.5102	32.4239	34.6937	25.9186	25.4103	25.9013
EVM0023525	1.09523	1.63505	1.91113	10.8428	9.64327	10.486	6.28025	6.44095	7.75457	39.2571	36.4841	33.9432	16.9191	16.8541	16.3162	11.8404	11.2304	9.39098	6.82284	8.36867	8.01519
EVM0010818	0.0345854	0	0.20368	18.1543	21.4042	19.2859	13.208	12.3098	16.052	12.2748	10.7448	11.7325	31.8635	33.349	30.8527	31.4618	30.0396	31.536	23.5796	24.5245	20.628
EVM0013994	724.212	676.633	694.622	451.944	455.721	373.374	282.03	263.482	281.515	511.765	515.953	527.657	279.934	265.651	288	199.433	220.757	219.47	147.194	157.392	149.052
EVM0000786	2.26162	2.23904	4.06975	53.809	52.3581	55.0536	66.2809	73.3014	77.6508	15.5157	15.0222	19.0384	86.3703	82.7396	86.0657	111.307	118.169	104.182	107.345	115.203	110.617
EVM0016159	17.5019	20.8131	19.497	26.3343	23.7965	27.9555	41.7093	41.2191	42.1616	46.4217	54.5784	54.1564	37.4892	42.491	36.7398	46.767	49.4773	43.3509	21.4609	26.6338	22.529
EVM0019104	1.54746	0.777524	1.27906	3.47062	6.72065	3.83484	0.152843	0.290612	0	1.043	0.885235	2.22567	0.107501	0.212829	0.108118	0	0	0	0	0	0.0993395
EVM0006123	9.74696	10.5187	7.81997	0.246253	0	0.312998	0	0	0	0	0	0	0	0	0	0	0	0	0	0	0
EVM0020612	26.3936	25.9967	30.8407	1.06506	1.38898	0.942784	0.589655	0.700722	0.747097	12.9336	11.5262	9.69676	0	0.102635	0.208555	0.111305	0.533029	0.111568	0.302573	0.291123	0.862297
EVM0023930	0.61195	0.243418	0.525569	0	0.0751435	0	0.143551	0.887067	1.09128	0.0699706	0.138569	0.0720813	0.605791	0.39978	0.101545	0.216776	0.415248	0.651864	0.19643	0.377992	0
EVM0000210	322.739	325.497	338.558	0	0.0999818	0	0	0.181582	0.0967997	0	0	0	0	0	0	0	0	0	0	0	0
EVM0005854	9.93729	10.6055	7.95862	0.295215	0.299444	0.225139	1.54452	0.435068	1.15966	1.33839	1.65658	1.14897	4.58671	4.93864	5.26049	4.31923	3.47497	2.59765	3.60072	3.6904	2.90002
EVM0001676	291.9	285.697	311.784	353.314	358.376	340.308	34.0957	36.9223	36.6195	751.166	784.561	745.82	18.5813	20.3586	21.2436	21.567	21.228	20.678	7.18369	6.61455	8.65867
EVM0026469	93.997	89.2694	90.9413	3.08473	5.28439	4.24756	0.597734	1.01024	0.538548	30.3006	32.4397	29.4138	0.467123	0.277442	0	0.200587	0.192118	0	0.181759	0	0
EVM0001393	1.65149	2.62767	1.62099	1.39949	2.83909	2.19176	0.774809	1.56528	1.37436	5.19287	6.73129	5.73857	2.31606	3.50642	2.6034	2.77885	1.26072	1.9058	2.12044	2.42273	1.76254
EVM0002297	0.288211	0.366857	0.509201	0	0.0566248	0	2.05529	2.05678	1.75432	0	0	0	7.91261	6.25106	6.5807	3.18538	2.11216	2.04673	27.2358	28.1989	25.1698
EVM0015752	26.6671	21.9232	26.9007	1.79074	2.86586	2.27611	1.04099	1.20957	1.05515	12.8167	14.9985	16.2234	1.35587	2.04009	1.63638	1.39733	1.3941	1.45899	0.791359	1.57358	1.30305
EVM0013416	15.0983	17.8763	15.9525	16.6793	16.3059	15.623	36.0023	31.4056	30.7175	28.614	24.4442	27.3235	32.0562	32.0037	28.0417	40.9226	37.3777	39.8388	40.6089	41.81	40.1255
EVM0028075	7.65505	8.21719	8.86346	3.72906	5.4936	4.99371	13.1184	15.0884	13.1661	2.55771	3.27996	2.67806	5.86879	7.06722	6.45015	6.43017	6.59415	6.44535	7.82769	7.92786	7.60371
EVM0005508	17.0275	19.6817	21.1551	23.5034	18.5052	22.1442	8.28054	11.6569	11.4062	112.65	113.544	113.117	10.8268	12.1956	11.4146	10.5005	12.821	12.8554	5.88329	6.3595	4.8989
EVM0011285	57.692	62.0893	59.4063	46.4892	44.3733	46.3269	63.4447	66.2871	64.2857	27.7455	29.1482	29.7514	89.3702	89.568	80.4694	94.0504	91.1913	99.3251	75.2761	72.6008	77.2756
EVM0008458	0.520755	0.405079	0.545215	0.638827	0.272833	0.512828	1.3356	1.48652	2.44339	1.04796	1.35214	0.687001	1.83294	0.816487	1.24434	1.42658	1.27212	1.42995	2.54078	3.17373	2.45598
EVM0003728	24.5057	27.6544	28.5447	46.8248	44.7156	42.6361	89.0384	86.3664	90.937	47.0899	50.2821	49.3047	75.5785	67.9705	73.5347	68.2524	63.0828	69.2687	160.645	162.897	162.888
EVM0023899	23.3446	23.3261	27.9545	26.1808	23.6205	25.0439	18.9256	21.5741	19.3163	30.3224	27.2763	29.4772	28.964	29.7694	27.5189	30.1673	29.0204	29.2438	26.2567	25.4361	27.4485
EVM0024475	33.5409	39.9831	33.5427	26.6226	29.9958	25.525	58.7501	58.8167	57.1419	37.0121	36.5059	35.6686	36.9621	37.4155	38.6971	43.0423	41.2787	43.818	26.5094	28.0959	30.6343
EVM0021612	17.4791	17.9998	18.0141	26.0268	20.6046	22.5248	36.082	37.551	40.3133	40.1045	44.4608	46.8045	41.143	43.0111	43.2162	44.787	37.9542	41.2724	36.5624	31.6698	33.1338
EVM0000266	0	0.0740027	0.0684776	2.83779	2.1931	2.5764	1.44017	1.43139	1.32706	0.957247	1.83253	1.44631	5.61718	6.83658	7.4091	6.12901	7.29047	4.65715	3.85179	4.05077	3.91432
EVM0024581	0.153956	0.163306	0	42.0468	8.31811	5.11692	3.61148	8.65214	4.24632	9.01293	3.48616	2.9015	7.92513	11.667	17.1675	21.3785	25.2815	25.8023	9.29062	9.88999	11.2669
EVM0013993	75.0514	74.195	75.7036	25.0105	26.1337	25.6791	30.32	26.9726	27.7704	17.4101	14.2617	16.1825	40.9378	34.8722	40.5412	37.9408	39.9787	39.1362	28.048	26.2384	25.9585
EVM0006560	22.2636	29.1551	24.4154	151.997	142.564	139.313	25.4036	22.4346	23.5272	160.657	144.145	158.899	23.7628	21.0088	22.4397	24.1467	33.1987	36.1103	13.234	14.431	13.9128
EVM0025385	0	0.052161	0.1448	0	0	0.0907989	0.184565	0.307061	0.935382	0	0	0	0.51925	0.385502	0.522232	0.278713	0.467154	0.419056	2.77808	2.18695	2.03927
EVM0016758	3.30794	3.88098	3.49283	5.48504	4.4312	3.47044	67.6272	74.6649	82.8955	2.56738	1.95206	1.65302	52.8574	51.5374	50.1669	66.0468	62.238	62.9282	33.2058	39.3173	33.6837
EVM0015151	3.26483	3.23865	2.70013	7.31923	7.45378	7.31221	4.82209	5.95959	4.97395	0.553041	0.438095	0.883071	3.07237	3.5548	2.48806	2.57007	2.29745	2.79081	2.05714	1.79257	1.99107
EVM0000559	0	0	0	0	0	0	8.89269	8.36023	7.71171	0.0963232	0	0	8.33947	8.94313	6.29052	8.05733	9.71789	10.4693	7.70667	8.19555	7.32102
EVM0010290	0.113668	0.361714	0.446278	0.770594	1.00496	1.67907	0.213314	0.709781	0.54054	0.103975	0.514778	1.07111	1.35029	1.18813	0.603576	2.57701	2.77673	2.74453	0.583781	0.421267	0.415926
EVM0022658	56.3087	59.7914	62.9809	36.7784	37.7146	35.1976	31.2209	34.3273	31.1928	52.2146	55.234	53.7617	25.023	24.4202	24.416	21.6757	22.0934	22.0228	20.329	20.7362	20.9089
EVM0007451	0.282849	0.400035	0.185084	0.456554	1.66714	0.52227	52.6381	33.3896	39.4552	0.776186	0.426987	0.444222	102.792	102.616	111.142	48.7621	41.7131	39.5035	433.015	406.379	426.641
EVM0017454	0	0	0	0.0825637	0	0	0.159985	0.304192	0	0	0	0.642669	0.112524	0	0	0	0	0.121082	0.109459	0.210633	0.311945
EVM0003038	2.28351	3.53021	3.21895	6.14049	6.4671	6.54889	0.775002	1.36522	0.716234	2.19988	1.45221	2.17468	0.38477	0.856985	0.515973	1.13591	1.21983	1.2421	0.842149	0.540186	0.533338
EVM0010620	48.8644	57.6289	48.2776	7.36841	6.2634	9.20069	0.80439	1.09929	0.458626	4.85202	3.78532	4.79642	0.353601	0.140011	0.426758	0.0759195	0.363571	0.228296	0.343968	0.595712	0.392107
EVM0012895	221.248	205.041	226.351	25.8081	24.0299	23.4038	0.448798	0.609523	0.714849	4.56264	4.88924	5.98801	0.180376	0	0.45353	0	0.278193	0	0.0877312	0.253233	0.083341
EVM0000683	58.4869	58.427	53.8681	5.62551	5.96845	7.39683	0.75177	0.476465	0.698499	3.23683	4.53551	5.72522	0.264376	0.0872347	0.0886313	0.0946042	0.99671	0.37931	0.342898	0.247441	0.0814348
EVM0027478	60.3579	55.487	56.3649	6.8693	4.28782	5.16315	0.191982	0.0608384	0.12973	1.6844	1.66788	1.54241	0	0	0	0	0	0.0968658	0.0875672	0	0
EVM0008230	9.05389	10.7578	10.87	21.94	23.972	25.5428	49.4775	46.5177	50.4833	33.767	31.289	31.5633	44.5702	37.8242	35.3863	39.6981	41.6081	39.0744	35.4232	33.6506	37.537
EVM0027320	36.6446	39.5364	34.8375	30.3687	29.1068	27.4034	1.17889	0.280188	0.448098	38.0687	39.0231	35.5667	0.20729	0.0683985	0.347468	0.148353	0.213135	0.371759	0.268858	0.194012	0.127702
EVM0016750	10.2706	8.8465	12.279	14.2097	12.6685	13.9023	12.1731	15.8437	13.7342	11.7964	12.5201	12.8071	51.1673	55.5942	55.049	88.3023	92.4343	85.3301	66.1332	62.8673	65.4611
EVM0025454	8.92272	6.53508	6.77699	0.102874	0	0	0	1.04231	0	1.84612	2.02045	1.40134	0.56082	0	0.42303	0.903077	0.288316	0.452605	0.818314	0.393673	0.518243
EVM0021154	73.6965	71.8736	76.7477	82.3371	87.6598	88.3788	179.594	192.37	197.871	99.7473	102.338	98.3635	108.993	118.115	96.8003	105.84	100.468	105.065	51.7292	52.3768	48.8022
EVM0021080	1.47798	2.02499	1.57158	1.43138	1.81486	1.13709	3.29367	4.22993	3.10421	2.36589	4.90851	2.78544	1.62567	3.05756	1.55325	1.22163	1.67151	1.74931	2.68835	2.05408	2.70405
EVM0002514	33.5718	35.401	40.1955	28.7165	30.0988	29.5041	36.4163	36.0899	36.7864	38.0923	40.136	38.7447	33.0926	31.8112	30.4399	38.0465	41.6267	41.3182	26.3536	28.1239	27.9281
EVM0002548	8.08151	6.06958	6.52818	2.73486	4.0698	3.41323	6.90315	7.15935	8.78169	3.94258	5.31742	5.00686	4.02154	4.10227	3.45274	4.58045	4.63919	4.67042	3.24409	3.12132	2.94579
EVM0024046	2.17345	2.25886	2.2626	20.0074	18.8922	18.3836	16.8094	16.5093	15.2425	41.3284	41.1022	39.6374	10.8086	11.9041	11.3661	14.1541	13.3181	16.2454	30.2739	29.752	30.6066
EVM0022322	59.962	60.2655	66.7856	4.77753	4.76242	5.41809	3.59128	4.70398	7.1185	0.700196	1.4637	3.286	3.2556	3.00045	4.74208	6.38732	4.6171	4.832	3.82214	4.09778	4.04583
EVM0003521	12.9771	11.8881	14.5571	14.3226	18.0873	16.0263	22.6928	22.1751	25.9268	20.8889	24.1569	21.5984	23.7465	25.103	24.1626	21.2536	23.2725	26.9888	20.3948	19.5709	21.584
EVM0016148	40.3244	42.1194	42.1253	22.9955	20.3388	21.5876	32.5714	32.7476	32.5698	72.2158	75.628	69.7871	28.9552	30.8845	29.7987	36.7164	33.6373	35.2331	23.5539	26.6278	27.7681
EVM0010341	23.1751	21.5258	21.1138	14.3079	13.835	16.1125	7.69282	8.291	8.1063	9.5413	8.639	8.2228	17.7856	18.2422	15.7326	20.876	17.4058	17.063	14.1223	13.5878	15.1482
EVM0026612	1.0237	2.17174	1.79428	7.93141	8.76333	7.42586	6.72387	8.74048	8.41488	1.67214	0.6623	1.65368	37.6404	41.5593	38.0507	22.2761	22.4272	20.3554	11.36	11.1108	11.2375
EVM0005926	1.90635	3.15451	1.87115	8.04965	10.1875	9.504	1.57411	0.884286	1.523	4.04558	4.55845	4.52689	6.24022	7.17348	5.26379	2.59316	1.86276	2.59928	1.17488	1.50723	1.48812
EVM0006628	0	0	0	0.532277	0	0.338273	4.29751	1.74318	1.62623	0.335156	0.608429	0.287722	2.17629	3.03197	2.91838	1.90364	2.73491	3.55607	6.74304	8.44931	6.70355
EVM0019979	2.48899	2.41545	2.96282	35.4911	35.6874	40.629	15.7022	11.1959	10.8288	1.06571	0.76746	0.449122	20.3406	21.5881	21.6525	25.663	29.251	27.7544	20.0585	18.1218	15.7605
EVM0012150	0	0	0	0	0	0	0	0	0	0	0	0	0	0	0	0	0	0	0	0	0
EVM0010890	36.9932	38.5477	38.0391	31.0879	31.1487	30.8403	38.262	39.8381	39.1859	19.2468	19.2354	20.0118	33.413	37.6361	35.3804	34.3904	34.0895	38.8269	28.8169	32.5624	28.9665
EVM0006114	7.93639	6.52423	9.46466	0.461171	0.545741	0.293084	18.1331	15.1858	15.5492	6.82402	8.30262	6.73072	9.0088	12.7545	12.8006	15.2376	15.5098	13.921	16.4059	14.2163	15.9237
EVM0015065	28.7058	33.7916	31.0424	21.5857	19.8564	18.2357	18.4976	19.2309	18.0914	56.7339	63.1042	55.4397	14.7601	16.6695	15.0999	10.7813	9.33521	11.4617	8.2398	9.1148	9.18673
EVM0019919	0	0	0	0	0	0	0	0	0	0	0	0	0	0	0	0	0	0	0	0	0
EVM0023075	21.7695	20.1465	21.7081	28.4776	26.2511	27.7006	15.7196	14.7756	16.5937	68.397	69.4124	63.1169	12.7012	14.0569	14.617	13.7244	13.0593	11.2922	8.74991	9.08137	9.19713
EVM0008118	0	0.0798832	0.443514	3.5009	2.14543	1.32104	0	0.134359	0.214877	0.137775	0.136424	0.0709655	0	0	0	0	0	0.106962	0	0	0
EVM0004297	51.8205	46.2702	45.7665	68.504	68.7872	71.6625	91.1957	93.1838	95.8158	62.6019	55.4526	63.5631	70.491	67.2075	69.0817	79.159	75.1492	80.8209	98.2589	95.891	93.2753
EVM0026248	67.3162	62.9485	69.4058	64.3362	65.0645	65.3739	7.98783	10.3593	10.2493	43.9762	42.2971	47.2502	5.9754	7.45807	7.64279	6.27526	4.80826	5.59118	2.90631	2.61396	2.04065
EVM0012123	24.6633	23.6339	20.2671	22.7321	23.5345	21.6701	22.8108	21.253	21.5266	17.8382	17.5434	17.5864	14.9082	15.0458	15.1695	17.8797	18.5619	20.6792	18.9207	16.4605	16.7899
EVM0014475	4.42273	5.60671	4.12931	13.7901	12.8221	10.0586	0.303653	0.384905	0.461676	3.15752	3.17542	2.94782	1.06786	0.352356	0.787593	0.611396	0.512385	0.995864	0.415507	0.533044	0.460501
EVM0015281	27.1547	30.2908	29.8894	23.0805	21.0139	21.7625	19.122	20.7032	20.4685	16.9551	18.9992	18.7631	21.5874	19.809	17.4035	19.1281	16.1714	21.4593	17.6661	16.3882	16.9404
EVM0021187	8.13914	10.8252	9.62125	0.756529	0.767367	0.884035	0.0472885	0	0	0.230497	0.159766	0.33243	0.0997799	0.0329239	0	0.0357052	0	0	0	0	0.0614697
EVM0016366	99.2716	100.861	99.9839	247.14	251.888	258.318	310.949	338.35	328.507	258.768	253.099	263.916	300.312	270.766	278.301	278.49	278.896	278.049	345.522	329.13	352.093
EVM0025660	56.5336	53.0914	57.6931	41.0941	42.2729	41.6263	61.3831	60.0766	61.5567	32.3637	26.7769	27.679	62.8089	67.049	65.3521	76.9693	80.0275	79.7557	75.6314	76.2847	71.0369
EVM0001584	0.271031	0.718727	0.332533	0.131243	0.266247	0.875784	0.635782	1.14842	0.644432	1.17761	1.04332	1.14929	0.447172	0.973838	0.809532	0.768077	0.735649	0.673654	0.43499	0.502234	0.330578
EVM0026134	22.5393	20.99	23.26	35.9916	32.4772	31.8595	115.98	123.521	122.974	22.648	22.2074	21.421	66.5072	73.4025	71.6303	120.91	138.861	131.957	90.6604	88.422	90.0678
EVM0007545	0	0	0	5.13779	6.54454	7.11885	92.263	116.107	116.517	3.15986	2.4584	1.91823	155.188	177.316	146.826	158.644	171.368	211.06	136.783	116.899	123.618
EVM0018134	0.442273	0.312755	0.144702	0.85666	1.44822	0.680533	8.71484	6.96999	8.6932	0.674263	0.801182	0.555681	2.14046	1.92621	1.17423	1.25336	1.40052	0.62816	1.13572	0.54637	0.179815
EVM0022963	3.46557	4.09616	2.81845	4.02758	5.30114	5.21065	1.6259	1.23658	1.27133	1.53973	0.941688	1.44622	1.17624	1.94059	2.03738	1.75377	2.41881	2.53139	1.77986	2.01831	2.41542
EVM0022360	64.7019	71.2942	67.2594	34.0387	34.2461	37.0313	5.30015	5.75134	3.52725	33.3499	34.0565	33.8182	7.83219	6.03843	7.87716	7.11447	6.1172	6.15882	4.90828	4.08816	4.94103
EVM0010757	19.8599	19.2987	18.2503	7.09972	7.39783	6.64499	1.06306	1.24844	1.5846	21.8239	24.5678	24.5546	0.967607	1.13198	1.32704	1.88863	2.89422	4.07013	0.598976	1.56427	0.487716
EVM0007903	0	0.10751	0.198965	0	0	0	0	0.0904125	0	0	0	0	0	0	0	0	0	0	0	0	0
EVM0023726	2.15069	1.17998	2.47494	0.143647	0	0	0.0695871	0	0	0.339187	0	0.0698837	0	0	0	0	0	0	0	0	0
EVM0015811	11.2696	12.4765	12.5122	9.84075	9.43727	8.58506	79.0481	71.9089	74.3252	50.6414	52.1529	53.1555	67.0588	64.8524	71.9402	31.2389	31.2572	29.2134	17.3952	15.1393	15.9989
EVM0022973	0	0	0	0.490795	0.663768	0.467867	2.1398	2.63703	2.40991	0	0	0	1.56075	0.993204	1.56972	3.11164	2.40714	2.39922	1.62668	2.19117	1.85434
EVM0000238	0.879218	1.08805	1.29447	0.993417	2.87899	1.62344	16.3622	16.6011	20.7659	8.84665	10.0872	9.11351	29.786	29.1021	33.0694	39.6583	33.41	41.0007	19.3791	19.5508	20.9116
EVM0020446	18.367	13.3526	14.5102	15.315	15.0503	15.4267	3.86715	5.15501	4.13279	8.1135	6.53266	7.76726	6.03114	5.26782	6.06577	7.74407	8.14667	6.1717	2.53079	2.87775	3.7155
EVM0005949	0.293073	0.310871	0.383548	0	0	0	0.18333	0.174289	0	0	0.353936	0	0.128944	0	0	0	0	0	0	0.120684	0.119154
EVM0004898	0.589698	0.0781887	0.144702	0	0	0	0	0	0	0	0	0	0	0	0	0	0	0	0	0	0
EVM0010011	12.0289	10.4343	9.81272	67.5679	74.0503	69.89	38.1747	46.3071	47.4397	26.9942	29.1991	28.8664	26.5323	29.6171	29.3106	43.0275	44.8386	44.4958	11.8751	15.1242	14.9977
EVM0021089	33.4682	32.5152	30.841	50.1065	45.948	46.7263	71.3548	79.7051	81.1352	22.5159	22.9904	22.9058	56.3335	64.724	63.4504	71.8596	72.1593	67.2321	37.5839	39.8915	38.2623
EVM0018121	100.865	117	111.146	34.815	35.3726	34.8757	15.7692	18.3854	17.2944	20.6613	19.1835	21.5951	16.3698	17.1438	16.0661	25.0865	23.7021	22.2525	13.693	14.026	14.652
EVM0024393	5.42043	6.92083	6.65043	0.923532	0.887459	0.880387	0.376747	0.358168	0.381873	5.69274	4.50045	4.35105	0.0662454	0.196728	0.0666258	0.355579	0.0681133	0.142567	0	0	0.122432
EVM0013048	11.8338	8.72695	10.3984	16.1542	16.6624	13.8387	14.1706	16.9403	15.3817	13.2473	15.8226	13.3283	10.4874	10.9705	13.4651	12.9353	10.6302	11.8453	9.0441	11.556	10.516
EVM0014910	106.205	119.739	104.244	117.002	125.932	127.878	54.8197	52.746	56.5984	89.847	84.294	91.4828	157.095	151.251	176.377	100.017	89.6783	98.4024	74.4556	75.7296	72.849
EVM0021167	0.863833	0.836616	0.147458	22.2245	20.2922	19.5912	26.9243	30.4881	32.2201	10.9593	8.47055	8.98942	20.8703	21.69	23.7324	42.2018	43.6822	38.6207	49.573	50.9913	53.7806
EVM0008426	76.5604	74.7169	78.2796	42.0066	42.952	44.6461	257.812	272.713	274.918	55.7933	56.3156	55.2926	297.677	303.867	307.396	302.215	313.666	320.751	123.675	125.963	121.38
EVM0013516	17.5439	16.7616	17.8306	28.077	33.8573	28.2587	0.466999	0.499466	0.946706	0	0	0	0	0.0812852	0	0	0	0.0883601	0	0	0
EVM0020740	0.109326	0	0	0.0529397	0	0	0	0	0	0	0	0	0	0	0	0	0	0	0	0	0
EVM0020951	7.8403	6.80436	8.61038	18.8501	18.1506	17.0583	4.47574	5.62446	6.62245	0.551669	0.19864	0.464981	9.04591	8.09487	9.02507	6.2927	6.10144	5.37311	5.63167	5.89267	6.08546
EVM0010150	0	0	0	0	0	0	0.720776	0.456821	0.97411	0	0	0	0.84492	0.669106	0.679817	2.17689	1.04249	0.727343	2.95885	3.00504	2.34232
EVM0023821	1.02176	1.25494	1.05568	4.2186	4.70165	4.56765	0.655975	0.431742	0.920631	1.52492	1.50997	1.36822	0.212942	0.702635	0.571107	0.609594	0.729821	1.14569	2.3476	2.9231	3.60755
EVM0003464	4.84417	5.88425	4.9081	3.93477	5.06567	4.83295	3.5923	4.04243	4.75583	4.93136	5.09531	3.16587	20.3161	18.4774	20.6402	21.5883	17.8139	20.5295	16.4521	14.9608	14.8665
EVM0017531	12.579	13.6081	15.3721	10.3269	12.4388	12.0748	6.33147	2.89816	3.24842	15.545	17.7316	16.8774	4.72808	4.57146	5.8611	6.49216	5.87889	7.33571	20.3224	21.3028	16.7652
EVM0008219	5.63115	7.49689	5.30157	21.3136	21.2239	20.6362	0.161749	0	0	13.7709	14.2604	13.5365	0.151686	0	0	0.0814192	0	0	0	0	0
EVM0000764	3.03341	3.86115	3.40274	0.167873	0.510833	0.400076	0	0	0	0	0.157001	0.653354	0	0	0	0	0	0	0	0	0
add_RNAAddG017720	32.7094	40.1857	32.207	3.30817	2.74546	2.38911	0	0	0	1.89367	2.25013	1.9508	1.093	0.811468	0.961869	0.88002	0.280955	0.147016	0.930324	1.02299	0.757517
EVM0011953	34.5045	38.8086	48.1734	7.48996	8.66867	6.22466	0.0930349	0.265341	0	5.07896	6.28645	4.20442	0.523483	0.906838	0.526489	0.561969	0.269122	0.140824	1.01844	1.83732	1.33029
EVM0017611	1188.74	1260.5	1236.35	101.109	115.924	116.725	23.4072	23.7702	23.4176	56.454	58.7615	50.0668	24.3742	24.9745	22.6864	9.41065	10.8819	9.43286	34.5254	37.8214	38.1323
EVM0025078	6.87294	7.91458	9.36605	8.59004	7.76333	7.1797	10.8864	9.65581	9.43529	7.36348	9.55673	8.91259	10.6807	11.891	9.70972	11.6149	11.5239	12.5379	10.1199	10.464	9.20332
EVM0006191	19.1215	15.1834	18.0792	2.09251	2.12249	1.54593	0.506837	0.481843	0.565107	1.28464	0.782798	0.712596	1.14074	0.705755	1.00388	0.229613	1.02629	1.38093	0.762891	1.26785	1.12001
EVM0014606	2.70278	2.54837	3.04589	0	0.295008	0	0.281785	0.446482	0.190412	0.732532	0.0906687	0.282986	0.132127	0	0	0.141841	0.135853	0	0.128528	0.123664	0
EVM0012657	0	0	0	0	0	0	0.411254	0	0.416849	0	0	0	0	0	0	0	0	0	0	0	0
EVM0021193	251.018	259.067	268.147	41.889	41.5218	45.6559	91.9827	92.9121	91.4652	17.6804	16.384	19.1416	96.5615	99.3978	97.697	96.5295	99.2842	102.507	106.808	106.866	108.936
EVM0006941	2.29337	2.28669	1.39563	3.37603	2.79358	2.8372	14.9342	16.6936	15.53	1.0489	0.913982	1.72886	7.68872	6.47237	7.79376	3.96451	3.17465	3.19213	4.06354	2.71983	4.30775
EVM0022227	0.141883	0.551831	0.092842	0.916066	1.4867	0.829607	0.665655	0.759395	0.899616	1.21131	0.728229	0.534794	1.93516	2.59533	2.26018	1.27326	1.73298	1.41061	1.57882	2.16176	1.84592
EVM0018852	0	0	0	0	0	0	0	0	0	0	0	0	0	0	0	0	0	0	0	0	0
EVM0025991	16.8145	18.668	20.9051	44.5108	47.5711	56.9202	35.762	41.1981	41.2594	30.8638	32.4903	32.2174	39.061	42.0349	45.0888	59.2459	74.2395	62.8884	49.3672	59.1314	44.0256
EVM0003567	0.342928	0	0.403915	1.32847	2.29075	1.45637	1.54452	0.795359	1.36984	1.00379	0.0621217	1.22796	0.814744	0.537674	0.546282	0.680279	0.558478	1.07153	0.440305	0.338914	0.250963
EVM0004945	0	0	0	0	0	0	0	0	0	0	0	0	0	0	0	0	0	0	0	0	0
EVM0021203	39.8556	36.7385	42.646	24.8448	23.9876	23.8914	124.464	128.441	135.768	24.5955	23.9985	25.4962	105.582	99.4548	106.263	102.05	95.2276	106.756	58.8128	59.153	54.7743
EVM0022526	21.7581	25.2836	23.3959	25.768	24.7762	26.0689	9.2904	8.28706	8.40925	33.4692	34.2113	31.5223	17.5862	16.7164	18.1199	10.5654	9.78755	11.0533	8.37047	8.30538	9.24373
EVM0012673	26.6948	30.8982	27.0708	16.5568	18.0712	14.6085	20.1943	20.2842	20.9426	13.4364	12.077	12.3559	17.0515	16.2286	18.4347	21.5977	18.6961	18.7805	23.1223	22.589	23.5173
EVM0018237	0.588509	2.21955	1.66874	0	0.0642356	0	0	0	0	0	0	0	0	0	0	0	0	0	0	0	0
EVM0006798	0.791058	0.943986	0	0	0	0	0	0	0	0	0	0	0.130516	0.129197	0	0.140112	0.402588	0	0	0	0
EVM0005681	19.8982	19.7312	23.5247	13.1216	12.5628	12.7562	142.905	140.206	145.955	8.83482	7.16866	8.93278	85.5202	89.0962	91.4129	63.6761	74.3989	66.3032	14.9272	17.1795	17.3435
EVM0026495	35.2118	34.2106	33.1591	38.352	32.5348	35.4767	48.5541	57.3127	58.9703	37.4838	41.8772	40.8746	22.9688	23.6702	22.9652	20.8251	22.7854	19.6421	13.17	15.1303	16.868
EVM0009844	64.3814	70.759	67.2004	151.787	150.836	136.806	6.81619	4.99769	5.73486	100.41	106.565	102.231	5.45212	4.90075	5.48343	6.18934	7.08786	5.32731	7.55915	6.80386	8.04954
EVM0015058	48.0856	47.7475	52.9959	122.927	113.856	118.421	86.7284	87.3347	82.6272	79.7926	78.5822	81.1975	33.8916	31.954	27.2376	29.408	30.3043	23.4924	27.204	29.3368	29.8775
EVM0008601	167.554	175.834	181.239	133.524	147.134	129.642	164.401	169.343	173.999	356.244	362.227	349.678	208.92	227.034	223.442	136.062	146.824	128.29	45.2104	43.9198	43.1555
EVM0027400	22.1821	25.9238	22.4468	48.2412	46.1843	46.3953	8.19658	8.1426	8.54148	16.5197	14.8019	16.9255	15.4165	13.273	14.7233	11.6823	10.7229	12.4766	7.75032	7.03263	8.67935
EVM0021033	33.4803	38.3844	39.651	9.02847	7.68074	9.71723	17.7768	12.7869	16.112	22.5563	21.6088	18.3249	7.80622	5.89374	7.05264	4.11905	5.1695	3.70166	2.7028	1.36217	1.95622
EVM0025398	12.3396	12.2221	13.1143	45.6258	44.3126	47.9456	39.336	41.2962	40.4152	17.1926	16.5059	16.2096	23.8375	27.2803	27.3373	44.8694	40.7015	38.998	20.5126	22.3106	19.1373
EVM0027373	0	0	0	0.682085	0.798296	0.850288	459.287	465.683	448.224	2.72558	0.441632	0.306305	357.681	351.448	360.742	332.622	312.771	366.725	265.648	285.378	287.707
EVM0011931	166.285	178.692	170.491	83.4525	84.9821	84.2631	28.8445	32.5789	30.854	29.1768	31.2931	34.4789	1.70559	2.22152	2.1668	3.5656	2.76897	3.8638	1.92109	2.26848	1.49315
EVM0004829	43.8557	50.6425	48.1101	19.6109	18.7462	17.3571	67.3463	66.7993	61.3389	14.2878	13.8277	15.3515	30.8786	29.0891	30.7276	38.4567	31.8932	38.9992	22.4147	22.3959	23.5344
EVM0016876	4.9218	6.82706	5.94574	4.5833	7.43833	11.3599	2.48672	2.02637	3.33074	2.77051	1.28594	1.69461	3.3731	2.47335	3.01553	3.35286	3.46821	3.62964	1.70137	2.33855	2.3089
EVM0012912	15.6733	15.2287	14.8916	16.6972	16.6284	16.1486	43.2373	45.691	46.0317	14.6235	13.2309	14.2375	31.3622	28.7517	26.4656	44.9498	39.9891	46.4806	28.415	27.572	26.6872
EVM0000366	0	0	0	0.0492849	0	0	0	0	0	0	0	0	0	0	0	0	0.20719	0.0722778	0	0	0
EVM0016580	0.136021	0.0721406	0	0.329331	0	0	0.191446	0.0606683	0.0646835	0.186632	0.0616007	0	0	0	0.180567	0.0963675	0	0	0	0	0
EVM0022383	87.8867	93.224	93.214	222.512	223.653	223.269	40.9592	38.4935	38.5849	565.563	552.548	557.896	25.9494	27.3199	27.7573	19.3584	18.202	19.7591	19.8945	22.3319	20.7279
EVM0024316	31.6138	37.8806	35.1961	14.4297	16.3043	13.8907	8.40472	9.29585	8.90883	12.7453	12.5408	14.0951	8.19094	8.83485	8.43227	6.63633	7.5082	8.39815	5.18659	4.12243	4.89134
EVM0022779	0	0	0	0	0	0	0	0	0	0	0	0	0.256856	0	0	0.27574	0	0.27639	0.249858	0.480806	0
EVM0010994	46.374	50.6992	48.4033	1.05621	1.35083	1.7073	0.0889847	0.211491	0.360782	0.607231	0.601277	0.67023	0.625866	0.867359	0.377676	0.403128	0.386108	0.134693	0.0608817	0.117155	0.11567
EVM0016270	226.1	242.43	231.373	305.409	333.508	309.559	174.879	193.262	182.584	159.276	159.458	155.011	281.109	309.136	319.429	262.597	237.261	287.327	230.085	228.729	204.697
EVM0024380	0.614174	0.473799	0.383621	2.2711	2.90697	3.29905	4.97705	4.33316	3.7172	4.03474	3.13546	2.84112	24.5408	24.8764	24.9041	27.7691	29.7792	31.5618	22.2234	26.1417	25.8784
EVM0021738	14.3197	16.1918	15.3459	12.6546	11.6653	12.6324	18.6799	16.8424	17.664	13.1737	13.6214	12.0417	16.9755	15.5691	15.1366	18.2235	16.3667	18.7042	15.4315	13.3247	14.7595
EVM0007627	8.40273	6.82529	6.98443	27.0528	32.1253	30.0522	10.0153	10.1967	11.7356	12.5333	14.6731	16.2641	6.79442	7.31921	6.63245	9.11743	7.6024	9.35398	12.3439	11.8768	12.2802
EVM0022664	20.4521	24.669	24.4938	13.5991	15.5743	14.3729	20.2109	20.1673	19.7057	15.0432	18.4382	17.7981	22.3364	22.4846	19.932	25.6816	24.7786	27.2055	20.6501	20.3871	19.2909
EVM0023959	1.02601	0.680201	1.13295	0.993666	1.0079	1.65768	0.361021	1.02965	0.975822	0.234629	0.464657	0.36256	3.21634	4.02169	3.57531	3.81626	2.08865	3.64311	2.30537	3.01032	1.87715
EVM0024518	3.24875	1.98148	2.75031	9.47833	10.3721	9.71038	1.14313	2.78936	1.46767	15.8615	15.7428	16.9522	3.80566	4.40392	4.52833	2.70446	2.42494	2.99923	1.51208	1.30436	1.33735
EVM0013400	2.39263	2.74942	4.10978	3.95854	4.30905	5.24624	0.56126	0.355722	0.189632	0.0911912	0.541783	0.657594	0.789515	0.390769	0.529366	0.98882	0.135296	0	0.128001	0.246314	0.243192
EVM0026582	65.5939	76.3979	73.9056	105.717	107.194	110.508	33.8084	36.5874	37.9956	0.348029	0.310155	0.537791	75.53	72.9772	63.0842	57.7393	52.7198	49.9859	25.8424	23.7363	26.7767
EVM0017740	0	0	0	0.102427	0.103894	0.195283	10.7176	9.43435	10.3605	0	0	0	3.90867	3.04007	3.65032	4.79547	4.30594	3.60509	8.14756	6.01007	8.38483
EVM0018581	17.7507	19.6132	17.6044	3.87993	2.84568	2.50372	1.96631	2.85899	2.57925	1.57859	1.17234	0.464632	8.21656	7.00611	7.60919	5.50198	4.93511	4.72712	4.11507	4.64461	3.90914
EVM0022828	36.4875	39.4677	33.579	28.7778	28.5955	29.2162	44.0265	41.804	39.3078	28.8415	27.9322	30.2275	37.1284	36.6403	37.992	47.9441	44.942	49.3671	39.9655	41.159	35.7509
EVM0010062	41.1763	31.8602	36.6789	45.2044	47.0987	49.4067	56.036	62.3925	68.0642	52.0472	56.582	56.1419	31.5486	37.402	36.8776	48.2544	43.0594	44.0623	28.5165	27.7857	29.3254
EVM0014500	0	0.106182	0.393018	0	0.49168	0.646927	0.845354	0.178593	0.476031	0.915665	0.72535	2.26389	1.84978	0.915546	1.46175	1.84394	1.22268	2.41699	2.57056	2.47328	2.68612
EVM0001282	1.8595	1.95051	1.76433	1.20059	1.6846	1.46877	4.05181	3.4281	3.22267	1.75763	2.17081	1.47967	4.66332	4.0763	4.3884	4.53776	4.93501	5.07668	3.42211	3.42023	3.42727
EVM0025579	2.34311	2.51535	3.15882	4.3471	2.99504	3.10149	7.73475	8.43617	6.65862	5.57773	5.4719	6.62384	7.67586	8.26222	7.30771	8.8802	7.27929	8.37992	6.19813	8.36993	7.47187
EVM0010626	32.8093	33.1744	33.5935	32.8798	30.7616	31.707	70.7623	72.9929	71.089	38.4319	37.7344	38.8498	51.6654	54.7413	48.5153	64.1596	63.4262	60.0646	43.237	44.6139	46.4954
EVM0026946	2.49487	4.74145	4.08134	2.41622	2.2466	1.72751	2.24344	3.43104	4.15246	2.28212	3.57793	2.54687	5.48837	5.56873	3.58792	7.36484	7.47713	4.42933	2.53596	4.62313	4.56452
EVM0012520	0.486501	1.34172	0.764027	6.59629	6.78636	7.0966	0.821685	0.607572	0.647783	16.1095	15.4228	14.4866	0.898994	1.01704	1.42082	0.551479	0.792294	1.65834	0.124929	0.120201	0.593388
EVM0010227	66.1359	66.7868	74.1882	104.885	101.539	104.932	34.6669	45.4107	47.7455	40.3737	38.1897	41.5915	25.8717	22.2017	23.2123	24.5768	23.7305	24.034	24.1711	24.4758	25.1975
EVM0024249	39.87	39.5432	37.5798	23.14	22.1989	22.1918	11.7499	12.968	15.7428	28.4387	23.4666	22.9219	22.4179	25.2003	23.1198	19.3752	16.7991	18.3988	35.6677	36.8072	35.4628
EVM0012328	26.037	27.2866	24.8987	19.8745	18.0314	19.482	27.6577	28.0666	29.8817	21.7128	22.855	23.1673	20.4844	23.7785	20.2463	26.4201	27.6685	26.7679	18.2348	21.4343	20.5089
EVM0008650	17.6931	13.6736	16.0905	15.2469	12.0601	14.468	22.5648	25.5106	24.2799	13.8392	15.208	14.9712	16.681	16.7012	16.2016	19.34	18.9155	20.5652	12.0077	13.5606	14.7099
EVM0016426	5.8924	7.14314	7.24538	25.5231	25.0618	26.6622	108.574	117.544	115.655	12.1421	7.91763	7.62706	10.3415	10.9984	10.8306	11.4688	12.5663	11.5878	4.90516	4.71953	5.60744
EVM0017358	8.45407	5.7915	6.5116	0.227432	0.403708	0	7.27154	7.69852	8.20803	0.0537023	0.0531758	0	5.57932	5.13941	5.61136	1.66375	2.23092	1.5843	0.376898	0.435162	0.28643
EVM0017560	1.42017	1.73818	1.07227	0.2116	0.107316	0	0	0	0	0	0.296845	0	0	0.142736	0	0	0	0.155159	0	0	0
EVM0016063	14.6673	15.1365	18.1196	57.5542	55.0073	53.6981	54.3722	55.4614	56.8986	41.2408	40.3457	41.4295	70.7624	78.8741	73.3748	78.9851	83.5929	80.4543	74.3545	81.1806	75.1282
EVM0008997	33.3134	33.9898	30.2652	6.79225	4.0387	7.25639	4.0846	4.20677	4.9452	3.81598	3.55952	3.7032	9.89543	9.87444	8.58783	11.651	13.5386	10.9056	4.81293	4.03327	4.64583
EVM0011241	43.5061	45.3158	56.8228	7.09278	7.53698	2.81726	0.409042	0.0777742	0.580451	1.19627	2.606	1.56099	0.115079	0	0.115739	0.123539	0.118323	0	0	0.107707	0
EVM0014931	48.4259	43.6974	48.2468	44.8908	39.0369	37.8778	23.9816	31.6486	27.7195	23.2248	23.6063	24.1894	26.3366	28.6336	33.9282	31.2113	31.1106	33.7528	40.2278	38.9131	39.2402
EVM0017883	741.427	782.753	745.276	198.854	208.347	201.461	107.687	119.334	136.102	94.2994	93.8907	103.316	185.406	199.625	177.776	135.684	156.913	140.251	68.833	73.792	65.5621
EVM0001269	3.54099	2.44958	0.906678	0.149102	0.151238	0	0	0	0	0.140827	0	0.87045	0	0	0	0	0	0	0	0	0
EVM0001414	14.9202	16.0292	16.5848	18.9886	21.1083	20.4561	23.034	21.7559	23.6203	15.7767	18.1053	17.9049	24.7009	30.9911	25.5622	33.4736	32.5363	32.6923	28.2851	27.0571	32.1969
EVM0001177	2.97219	2.82083	2.76377	0.227249	0	0	0.0733909	0	0	0	0	0	0.103238	0	0.103831	0	0.106149	0.111089	0	0	0
EVM0024256	0.401162	0.270789	0.536938	1.13023	1.03894	1.14477	0.684395	0.683177	0.554965	1.90148	1.55252	1.23716	1.73291	1.5248	1.64603	1.39523	1.28683	1.55392	1.91983	1.89223	2.04617
EVM0022007	15.2553	17.1881	21.1195	35.8702	36.2722	36.0513	86.7405	84.4603	81.2075	25.7566	26.9477	28.2858	82.7468	78.9853	76.6226	79.4741	77.3032	81.4942	53.4019	47.1148	50.5444
EVM0009114	7.49174	9.0913	10.5913	11.376	11.2967	14.1463	11.4267	10.3132	9.50035	8.54493	7.79096	9.79045	6.14468	7.69387	6.91665	7.81961	7.48947	7.66292	5.26476	5.48448	6.43025
EVM0004263	1.96973	3.22214	3.26109	3.0798	3.56686	4.57916	2.76122	3.45067	3.97247	4.47184	4.64295	3.64513	2.0987	2.44958	2.42579	2.99278	2.96305	2.7639	2.83376	2.37471	2.31566
EVM0013513	0	0	0	0.589656	0.51266	0.722712	1.06098	1.16383	1.40631	3.5007	2.04831	1.72119	2.29609	1.59102	1.73195	2.4649	3.18712	2.71778	0.781738	1.28941	1.06088
EVM0022473	113.796	114.973	112.884	88.5462	89.3569	97.6604	294.008	290.318	304.923	85.3368	81.5456	81.7634	271.986	286.773	298.664	400.403	357.949	397.378	241.721	226.702	244.289
EVM0009248	1.48929	1.85851	1.54777	0.339373	0	0.161759	0.328805	0	0	0.0801344	0.158698	0.0825517	0.92505	0.572314	0.348886	0.744795	0.832241	0.497702	0.562406	0.757572	0.534263
EVM0002203	10.5146	9.07694	8.79334	15.1168	14.3966	15.5921	10.0309	11.2151	10.5254	8.92934	8.70542	8.15822	7.94945	8.03306	6.72921	8.60501	8.61633	7.19965	8.08732	8.06028	7.92748
EVM0021531	10.649	12.9011	13.0521	4.39752	2.70817	4.44161	1.62308	1.39838	0.873993	0.494459	1.17507	0.967812	11.9152	15.5381	13.9929	11.2594	10.0504	10.3646	10.2026	9.81645	7.45032
EVM0025699	0	0	0	0	0	0	4.90728	4.55679	3.47027	0	0	0	2.08695	2.06586	2.58331	1.89571	1.32049	2.07293	1.87394	0.601007	0.296694
EVM0002170	7.52156	7.12958	6.75435	0	0	0	0	0	0	0	0	0	0	0	0	0	0	0	0	0	0
EVM0009689	71.3423	73.5432	75.9425	8.15007	5.55235	7.01558	4.06599	3.52936	3.8824	53.482	50.6255	52.2547	8.45501	10.4209	7.41978	3.91541	4.34671	4.54903	10.2405	13.3442	11.4899
EVM0001028	1.05421	1.49098	1.03475	1.92852	3.91229	3.78499	0.219819	0.313469	0.334215	1.50004	1.27315	2.98021	0.309216	1.22437	0.466488	0.6639	1.11277	0.665467	0.451189	0.868229	0.857222
EVM0010603	0	0	0.170542	0.336545	0	0	0	0	0	0	0	0	0	0	0	0.246196	0	0	0	0	0
EVM0026731	9.17217	11.3507	10.8192	0.155842	0.158075	0.148562	1.88737	1.65075	1.22435	1.10395	1.89475	1.8196	0.424789	0.630745	0.213614	0.22801	0.218383	0.685643	0	0	0.196269
EVM0006607	4.8967	5.19408	4.75962	4.32795	4.43665	6.29837	8.23023	6.89138	7.75441	6.523	6.00691	5.95819	6.4946	7.60917	7.54165	7.64571	7.87132	7.86633	7.4164	7.63495	7.71211
EVM0008888	38.1761	41.4809	43.8124	20.9037	19.4723	21.4183	28.657	31.2605	32.1192	7.47658	6.60532	7.14867	29.0061	27.8816	24.0398	28.0178	27.4991	31.4206	33.9973	37.7897	37.43
EVM0016470	0	0	0	0	0	0	2.94131	4.02662	4.41237	0	0	0	0.496499	0.163827	0.3329	0.533002	0.510499	0.890433	0.321983	0.774494	0.30587
EVM0004734	0	0	0	0	0	0	22.6854	29.77	26.5207	0.135675	0	0	67.3463	36.6274	3.54417	282.045	12.0776	21.277	120.168	8.61199	9.22646
EVM0015243	1.82587	1.61926	1.08705	3.76853	3.08742	3.2885	2.69626	3.65804	3.33077	6.07832	6.01872	6.57193	2.48901	1.79901	2.58278	2.79924	3.53412	3.57108	2.80553	2.69936	2.9207
EVM0012694	0.320066	0.905343	0.733031	0.413301	0.209611	0.0984982	0	0	0.10147	0	0	0	0	0.139397	0	0.151173	0.144791	0	0.136984	0.1318	0.130129
EVM0007128	31.5592	26.3024	27.8094	0.171228	0.130261	0.0408073	1.32717	0.473146	1.21911	0.121294	0.320279	0.249905	0.991795	1.03953	0.762787	1.18997	0.839803	1.38112	5.2779	4.42292	4.58249
EVM0016211	0	0	0	7.87406	6.81805	7.07903	0.682256	0.766541	1.19448	7.79982	8.20232	8.53341	0.0872471	0.0863655	0.0877482	0.187323	0.269122	0.281648	0.0848704	0	0.161247
EVM0003754	55.7479	47.9185	53.9928	175.791	148.603	168.876	2.63627	0.857408	2.95342	154.199	159.25	154.67	1.07348	0.483017	0.49075	0.73335	0.501706	1.05012	0.569586	0.913385	1.08217
EVM0016823	0.471415	1.00009	1.38813	0.730486	0.277856	0.17409	1.76935	1.34568	1.52441	0.172486	0.256192	0.355378	1.12001	1.60144	1.12644	1.46954	1.27954	0.669551	1.0895	0.81532	1.37997
EVM0014616	12.3687	17.3473	14.5683	5.39043	6.00766	7.35899	4.83571	6.80393	6.01252	5.21696	3.54761	5.50383	7.07441	6.1949	6.56773	7.59452	6.06157	7.71005	9.61673	7.38526	6.3697
EVM0027069	1.12054	0.22286	0.412443	2.23825	1.10076	2.06903	0.394282	0.624732	0.133216	1.6656	2.22017	2.44177	0.0924384	0	0.371877	0.0992345	0.285134	0.0994687	0.179841	0.951691	0.597944
EVM0010074	111.564	118.339	114.187	113.003	113.334	105.852	242.789	246.892	251.453	92.0101	91.8021	90.8255	171.139	168.247	176.322	242.253	235.145	241.315	144.322	145.274	146.598
EVM0001721	7.79173	7.13144	6.38049	1.98354	2.36186	2.79521	41.36	40.5913	37.307	4.88727	4.83935	5.11861	22.0968	25.2476	24.3515	34.3202	47.8567	43.0016	20.4087	20.1314	21.5053
EVM0016256	49.9185	51.3355	50.3151	60.3118	60.3402	60.6355	55.7872	55.033	50.6276	60.9777	61.9614	58.9359	31.26	27.7853	27.3387	37.9353	35.1185	37.5798	35.4669	33.7928	34.5658
EVM0015283	1.67934	1.61939	2.44753	21.5375	19.1465	21.377	72.2937	66.7313	68.5342	26.9056	25.766	25.7032	42.451	50.2669	42.0868	52.7107	62.1569	49.0767	53.1864	59.032	51.6421
EVM0005348	0.172111	0	0	0	0.0845365	0.0794491	27.8578	31.6273	29.9556	0	0	0.162183	31.1225	31.1454	26.9602	25.6067	22.3066	27.6228	31.9321	24.8766	28.2349
EVM0004707	23.773	27.1434	25.6412	2.48344	2.57149	3.20588	2.4061	1.42966	2.13399	0.781868	0.774202	1.1075	1.6218	1.81481	1.91479	0.756972	0.725013	1.06226	0.342961	0.329982	0.716757
EVM0025733	27.0302	29.0784	26.092	21.3509	24.1049	22.0643	53.6637	54.9506	60.9576	21.7441	25.2351	19.2688	80.2111	68.3797	75.3276	68.9953	81.2587	88.3082	58.6631	55.1011	52.532
EVM0009143	26.235	25.5461	29.5647	32.9984	30.7969	33.504	4.84095	5.44434	4.34305	8.75568	9.64419	10.2197	7.67901	8.60537	7.57739	8.58575	8.61059	8.94901	3.94632	6.56335	4.92705
EVM0017533	0	0.902704	0.104413	3.91491	1.7765	1.86601	3.99264	3.60596	2.93405	2.23804	1.83069	3.00724	2.66778	1.94587	3.10675	2.11025	1.44368	3.47503	2.04877	1.18274	0.778497
EVM0019712	0	0	0	0	0	0	0	0	0	0	0	0	0	0	0	0	0	0	0	0	0
EVM0025308	73.9701	80.7617	82.8592	133.416	127.874	134.91	117.024	112.664	112.989	73.7409	71.7947	78.9624	61.423	65.2598	57.5771	74.776	74.1027	75.003	78.1834	78.8904	78.6055
EVM0019539	50.9741	55.4941	51.1481	36.2125	36.5284	33.5195	85.58	88.1321	86.5971	198.083	193.942	196.904	72.0532	82.1217	80.0084	93.889	103.663	94.9175	73.4722	82.0483	80.9452
EVM0005030	479.561	471.337	514.657	403.531	381.326	400.46	76.1504	82.365	81.355	450.292	467.91	436.135	78.5801	76.4498	81.9404	52.4775	51.7489	43.8863	171.074	168.12	164.563
EVM0002358	1.63225	3.17419	2.26965	4.93997	4.0754	3.70456	6.57297	6.85551	4.72189	2.55064	2.09442	3.26845	5.74514	5.86481	4.51416	4.81838	4.43035	5.11953	6.02524	4.20089	4.89421
EVM0015910	0	0	0	0	0	0	0.208444	0	0.21128	0	0	0	0	0	0	0	0	0	0.142613	0	0
EVM0005923	26.3086	23.9197	24.7469	1.61773	2.15369	1.8795	4.89798	4.56331	4.66674	16.4254	14.184	15.3468	10.6793	10.3668	11.3643	7.32248	6.4466	7.85874	2.01066	2.12803	2.03738
EVM0027503	0	0	0	2.30846	3.06201	2.11598	154.066	180.98	186.854	1.00631	0	0.431944	99.709	92.7123	91.8842	78.2013	64.8218	76.8234	84.9864	83.469	86.66
EVM0017631	91.4084	91.0787	100.651	70.7663	76.854	68.1603	39.1278	36.1415	37.7223	55.8289	57.2988	57.5577	35.7138	46.6212	37.177	33.3708	34.7915	29.1421	39.9733	41.2705	40.9206
EVM0028007	210.124	218.002	202.125	83.1411	82.0862	76.3944	30.6515	30.956	31.1282	86.7776	92.3663	90.3396	25.6304	27.9904	23.8651	25.8728	22.5277	25.9783	22.5194	19.8487	21.4307
EVM0015517	1.16295	1.85036	1.99758	1.36093	2.28484	2.77365	0.454673	0.778052	0.921718	1.24107	0.614452	0.547933	0.383748	0.633118	0.707579	0.823923	1.11794	0.89469	0.622157	0.778197	0.472819
EVM0006542	42.1145	45.0965	48.4063	22.9123	22.5035	21.7957	16.4262	22.3088	17.8389	24.4773	28.088	28.0907	13.9299	13.9198	14.1427	10.2056	11.879	11.9346	10.9174	10.7514	10.7371
EVM0024017	22.1715	24.0631	25.4372	3.34175	2.41601	2.50784	4.23655	3.5692	4.81788	7.08484	6.71615	6.98724	4.11835	4.02877	3.21614	5.98152	5.08136	5.16147	3.62911	3.76385	4.11909
EVM0004038	62.3843	60.8893	67.8302	39.7632	34.6321	41.1202	66.8401	60.9988	61.3564	33.752	31.2748	30.3498	35.1708	33.994	34.8592	46.7332	40.7567	46.1567	32.8467	32.3803	34.6241
EVM0023256	25.7773	29.8459	26.1922	44.8308	47.613	43.0717	20.7806	21.0513	20.8907	25.9038	24.8277	30.2774	21.0852	23.2439	24.8209	23.407	16.5061	18.0479	15.15	15.2494	13.5062
EVM0006308	0	0	0.150795	9.15049	8.52697	9.0776	3.82011	4.17991	5.84466	0.491857	0.347882	0.14477	23.2184	23.1845	25.7991	21.1158	17.4096	18.1108	26.531	25.6219	30.5439
EVM0027972	9.00861	10.4604	9.6794	0.619499	0.0523645	0.295279	0.250087	0.237754	0.253489	0.292558	0.0482816	0	0.281434	0.905419	0.566101	0.528719	0.506397	0.378548	0.479093	0.72437	0.455119
EVM0018399	1.13727	1.10581	0.744183	0	0.2793	0.174994	0.0889269	0	0	3.46764	2.06018	2.32195	0.62546	0.990624	0.754862	1.07431	0.771715	0.403817	0.365053	0.234159	0
EVM0007825	0	0	0	0.349585	0.118198	0.0555423	0.564499	0.643994	0.228872	0.165091	0.108982	0.793667	0.238221	0	0	0.255735	0.489877	0.683571	0	0.148642	0.146757
EVM0005404	53.4018	57.6242	60.8979	62.8774	58.554	55.5757	43.7317	44.7377	48.6118	54.8609	58.4709	55.437	49.0378	44.8269	43.0442	44.4798	37.4896	42.7489	41.348	39.1445	42.432
EVM0015919	30.3002	34.7872	34.6392	33.759	31.5162	33.9685	18.1816	20.7148	20.7538	17.4217	16.4667	17.5153	24.3659	24.0864	24.303	25.4718	24.2236	25.6404	34.3926	32.6821	37.4232
EVM0013470	10.2085	14.6354	12.0554	26.3388	30.7901	29.0844	0.972851	1.70746	1.06194	7.95188	9.10195	7.59052	2.94752	2.50092	2.01159	1.4691	1.40708	0.906198	2.04802	1.67494	1.84826
EVM0026433	3.93541	4.32901	5.57951	17.1275	21.907	20.9026	22.3383	16.0359	17.1434	3.95534	1.45221	2.79274	23.3427	23.2973	25.4762	29.0518	27.034	29.4654	24.3288	22.9879	24.7113
EVM0021731	0	0	0.197321	0	0	0	0	0	0	0	0	0	0	0	0	0	0	0	0	0	0
EVM0014362	52.5539	59.6041	57.9697	27.7113	26.8009	26.9082	45.1635	43.952	42.7543	32.0031	34.5823	33.498	38.8601	43.1817	36.2762	51.5021	48.5852	52.9678	41.0102	39.0015	41.7536
EVM0004268	32.8709	32.0523	33.4402	16.1246	17.3646	19.3623	7.87146	7.44512	7.69361	3.09291	3.14012	2.90388	15.9876	20.5794	16.7044	13.4635	14.5215	11.0637	36.1599	43.5157	34.768
EVM0015666	173.02	166.59	162.601	41.559	50.7936	45.5486	12.4072	14.6329	14.9488	50.2066	57.9059	53.7782	16.0535	18.3361	20.6996	12.7264	14.8978	13.288	7.9282	9.16921	9.43335
EVM0016439	21.8675	25.3163	22.077	16.5795	13.0117	12.1517	17.7438	17.0174	17.4702	13.259	13.3176	12.7169	8.74145	8.38101	9.1787	9.38412	8.81834	11.6543	8.66376	7.46113	8.94146
EVM0002915	17.3952	19.2617	19.2395	30.5708	24.2569	22.092	53.505	54.1214	59.2367	23.7513	20.5978	21.989	24.7522	24.5021	23.9932	41.9621	42.1482	40.1329	26.148	29.2467	30.0144
EVM0024548	24.112	26.7964	28.2663	14.5227	17.6602	14.9848	22.7446	27.2093	24.7153	15.5872	16.9392	19.1484	13.8886	15.6964	13.9684	22.8173	21.6805	24.3233	12.0882	10.9992	14.9126
EVM0014574	9.43006	9.2509	10.4054	2.11904	2.66404	2.19075	5.49409	6.7901	6.9464	2.84711	2.67963	1.45198	9.03008	9.54281	8.46829	12.052	11.0413	10.636	5.53951	7.4999	6.99135
EVM0021111	0.298263	0.421836	0.585512	59.5052	66.5106	65.3534	2.4255	1.86245	1.98571	9.45805	6.03342	10.3992	8.26732	13.12	13.0661	12.1153	12.8181	11.7202	7.02089	6.38673	8.73105
EVM0004954	2.58777	3.70565	2.15899	0.125309	0.508418	0.119455	0	0.346261	0.246118	0	0	0	0	0.84528	0.687049	0.183337	0.526791	0	0	0.319685	0.631264
EVM0016132	8.11523	9.13375	6.56687	5.81955	7.12001	7.14907	94.224	103.89	96.8022	7.53651	10.9414	7.35523	65.9037	64.3475	62.4993	86.1979	90.6295	84.0258	50.6663	50.2795	49.6421
EVM0000886	0	0	0	0	0	0.191129	0	0	0	0	0	0	0	0	0	0	0	0	0	0	0
EVM0026950	1.27114	1.47091	1.58794	9.17705	10.3869	12.6957	26.6738	33.399	35.0599	3.32967	3.19236	3.59345	41.3348	42.125	39.9615	56.9818	61.2412	66.5536	32.1967	32.1203	37.6329
EVM0006866	40.3254	46.5248	44.5888	18.27	18.6857	18.6148	24.3364	24.9129	26.4979	20.3265	20.715	20.2016	23.7184	25.1161	21.9533	25.8427	23.2331	26.5393	17.3832	19.0752	18.6696
EVM0001634	5.86099	7.31403	6.48596	1.78077	1.5805	1.11404	9.5971	7.12479	7.21378	2.52291	2.96658	2.49072	18.354	25.2258	22.3497	8.63043	9.51376	7.83469	2.36087	2.98137	2.80341
EVM0004134	0.0661006	0	0.0648801	0.0640167	0	0.122052	0	0	0	0.0604638	0.65858	0.436014	0	0	0	0	0	0	0	0	0
EVM0001253	3.6894	3.51548	4.3578	6.48001	7.12569	6.98553	1.6429	1.84079	1.7842	1.88759	2.039	2.18023	4.86969	2.12428	4.31658	2.39234	1.27297	1.77629	5.21877	3.55351	5.33897
EVM0025639	0	0	0.0205119	7.44794	6.91824	6.13532	32.4132	26.4713	31.145	22.0213	25.4207	25.7772	20.7702	21.7344	20.3069	30.9141	30.8001	29.8592	29.1126	31.935	30.9184
EVM0009221	506.59	511.611	529.916	122.292	114.635	115.256	88.9241	75.9369	79.0725	382.245	396.821	384.934	105.394	122.207	117.027	67.8116	72.6417	68.2493	47.8105	56.7469	50.8618
EVM0023169	0	0	0	0	0	0	0	0	0	0	0	0	0	0	0	0	0	0	0	0	0
EVM0020876	0	0	0	0	0	0	2.18417	3.21851	1.43903	0.106463	0.632512	0	0.92173	0.760347	1.08153	0.989496	1.26363	0.495916	0.597747	0.287563	0.709794
EVM0016509	707.703	772.583	756.405	178.815	171.574	177.684	148.373	144.748	138.093	160.315	160.598	151.889	115.181	115.115	110.95	96.1037	91.2565	95.2898	103.825	107.457	104.675
EVM0015445	35.1054	30.1027	34.3668	11.9576	11.7215	12.2071	4.02024	3.41102	3.89967	12.6846	13.1444	11.8082	2.7972	2.16699	1.46779	2.67645	3.12616	3.00993	2.01117	2.16272	2.19149
EVM0020541	120.603	135.696	130.646	189.072	196.301	199.145	171.13	179.932	173.094	407.913	407.075	410.823	72.5317	64.3834	69.0793	61.9979	60.2651	62.0898	92.0229	86.6455	90.3646
EVM0019889	18.3664	21.1177	20.3323	13.5103	14.3236	13.2351	15.2273	15.946	16.2012	17.2811	19.1118	17.6703	14.2492	13.6015	12.656	14.9988	15.9829	17.374	15.3011	16.9737	17.186
EVM0025072	33.7541	37.4	34.0662	37.3045	35.474	39.0809	39.343	46.0824	40.8323	42.0239	43.429	42.9135	37.0719	35.2557	34.8214	36.8127	33.8971	37.7544	23.7623	19.3933	22.512
EVM0000797	48.8156	45.6011	43.3045	33.0631	29.5886	30.1427	41.1012	47.0503	43.0348	33.2934	30.8401	29.0637	39.2197	40.9475	40.0444	38.8399	37.7516	42.6515	38.7891	35.5918	35.6914
EVM0015026	29.3719	28.8074	26.967	20.7123	19.4945	22.19	20.2528	20.1709	18.1973	19.0565	18.0461	18.5883	22.854	24.4825	20.7287	22.0696	19.5284	23.4692	22.0792	20.1204	20.8779
EVM0020339	1.87804	0.948614	1.31668	0	0	0	0	0	0	0	0	0	0.23608	0	0.237436	0	0	0	0	0	0
EVM0020746	1.52428	1.75159	0.935086	4.30567	3.3691	2.75589	0.357565	0.396588	0.543645	3.71813	3.50909	4.42877	2.59873	3.15336	2.9509	1.16991	1.63768	0.63144	3.42495	2.9815	2.86623
EVM0000597	14.2832	15.9104	14.5985	23.7486	27.0689	24.2729	16.6835	19.018	20.3167	36.1124	31.3314	36.8444	54.7227	56.3167	59.064	59.6414	61.6978	63.1334	41.4387	44.0866	40.804
EVM0005002	36.3186	42.2871	37.5271	38.0639	36.5626	36.6496	51.5666	54.5991	57.7307	41.926	37.7409	37.248	66.0719	66.655	66.6756	85.3708	75.271	80.214	59.9342	56.414	53.4324
EVM0012033	1.10568	1.64196	1.19379	8.03119	9.01518	11.2288	6.95112	3.64938	5.25798	8.09115	3.80561	3.54247	7.58891	6.93437	9.39384	5.48346	5.85217	6.43864	5.96253	5.32711	5.12471
EVM0016762	27.0925	33.373	26.7761	2.59966	2.39161	1.26792	0.995768	0.723919	1.2468	8.10845	5.71073	5.88243	4.69657	3.58879	4.5578	1.85753	1.60966	1.86191	0.721362	1.00254	1.90351
EVM0006891	10.4648	10.687	8.90564	5.71434	4.81194	4.67653	123.263	116.738	116.787	10.438	9.37768	11.9068	58.777	60.2195	51.2819	77.7687	87.7053	83.8817	17.0813	20.9734	18.9422
EVM0013122	0.434376	0.263289	1.09634	0	0.0609583	0.11458	0	0.110709	0	0	0	0	0	0	0.164752	0	0.16843	0.0881347	0	0	0.0756872
EVM0010833	87.5196	94.0132	90.3648	39.9348	39.7875	42.5917	73.5204	69.8273	71.4947	30.8584	32.7972	33.8831	36.062	37.9411	35.9339	50.6636	48.3875	54.1544	34.4636	35.5301	37.9132
EVM0019229	11.9542	15.9123	11.4267	0.52968	2.07232	1.29841	1.24631	2.02121	1.26327	3.50198	3.18457	3.31312	0.928145	1.12294	1.24463	0.442837	0.42414	0.332911	0.501589	0.482608	0.476489
EVM0018479	1.7521	2.69484	2.66561	4.15732	3.70053	5.5807	8.13793	6.25182	7.08218	5.68955	4.68158	5.36586	7.16914	6.98223	7.79178	7.19968	7.01461	6.47013	8.4361	5.08656	6.94542
EVM0022528	0	0	0	0	0	0	0.793898	0	0	0	0	0	0	0	0	0.299717	0.287063	0	0.271585	0	0.51599
EVM0001915	9.95115	11.5261	9.99193	28.1923	27.0792	29.0928	43.2522	53.1592	48.5729	47.2391	52.6294	51.9514	42.2725	46.4782	39.858	34.7646	38.0313	36.4712	25.1131	28.4725	27.2745
EVM0002450	48.3815	51.0967	50.8924	38.2043	39.8528	37.131	33.3986	30.0015	30.7543	42.6854	48.8036	51.863	33.34	35.7496	30.4155	36.8833	33.5669	37.6172	35.4456	33.1953	37.304
EVM0016453	204.414	206.086	210.476	164.806	170.346	163.372	189.454	177.69	185.875	129.111	126.427	123.758	266.501	247.167	251.263	332.692	315.671	341.633	266.748	253.687	240.029
EVM0015884	3.23067	3.83003	0.932651	2.57667	4.01372	2.19312	6.8652	6.10285	5.24155	1.65142	1.54916	1.61169	6.02005	6.08337	4.03642	6.86656	7.60829	5.93808	2.56202	3.52153	2.43382
EVM0008390	36.1451	34.143	36.8221	19.9716	19.8092	22.6918	28.7033	31.9715	29.9623	4.66359	2.89478	4.51745	22.6992	19.9842	21.0112	30.7296	23.649	31.6667	27.1614	22.1853	22.8321
EVM0011941	0.493075	0.672453	0.414832	1.70547	2.42186	2.92642	5.08926	4.83829	5.02452	5.99222	5.04025	6.04022	3.16111	3.86544	2.89874	6.88684	4.77976	6.20278	5.0647	5.74322	4.72534
EVM0010995	2.42971	1.8663	2.34373	3.77309	2.59258	3.82888	0.746843	0.822121	1.35464	8.04703	6.67805	8.64504	2.26702	2.24412	2.72493	2.78985	2.10354	2.26094	0.968166	0.931527	1.02191
EVM0009803	324.412	302.879	319.064	285.507	278.66	271.305	129.31	116.507	114.563	434.701	420.948	415.238	28.4023	34.4107	33.8438	30.5567	32.4409	32.9542	7.68795	9.53521	9.30021
EVM0003585	0	0	0	0.326065	0.248052	0.155416	0.0789778	0	0	0	0	0	0	0.109974	0.335204	0	0	0	0.324211	0.207961	0.307987
EVM0017119	16.6323	16.2917	15.3097	3.08286	2.65797	3.56334	6.08572	7.27639	6.84971	3.82168	4.57709	3.89946	7.40526	7.27844	7.44778	4.6796	5.45404	4.86019	3.83166	2.99848	3.25166
EVM0024738	14.7798	14.5886	16.3706	6.312	6.25118	5.92236	2.45581	1.6938	2.48922	7.55771	7.39065	7.25375	2.50624	2.48091	2.52063	3.70852	3.06443	4.08172	5.73251	5.13519	5.8838
EVM0003128	0.144362	0.153129	0	0.0699055	0	0	0	0	0	0	0.39227	0.476122	0	0	0.0958199	0	0	0	0	0	0
EVM0003008	143.551	144.528	144.804	55.9666	49.1152	53.9589	47.9624	44.1897	47.9585	29.7678	33.406	31.4091	32.2805	31.8255	32.335	33.1167	29.5772	28.6195	17.431	18.8018	19.7662
EVM0015423	0	0	0	0.092385	0.655959	0	6.26557	6.38206	5.26211	0.34903	0	0	2.51819	1.86956	1.51959	3.78466	3.75433	5.96136	4.89918	4.36025	3.49052
EVM0027554	30.3159	31.2937	31.2206	5.05756	5.99612	5.82311	1.46366	1.93597	1.41907	0.248149	0.55286	0.702994	7.42995	6.55736	8.73306	4.61274	5.70658	6.06852	2.69945	2.51351	2.3162
EVM0016249	0.967473	1.27057	1.49224	78.9288	73.2709	77.2831	21.5709	23.0963	22.3026	84.2407	90.9675	82.5708	5.95924	6.50097	7.40009	6.59321	7.06512	5.889	5.50114	6.43123	4.66394
EVM0007880	0	0.254349	0	5.41864	5.57478	5.31308	9.97481	13.1192	17.4084	3.14385	2.82344	2.63614	16.6689	19.3201	19.5233	25.9355	26.4676	22.9316	8.21003	9.87416	10.5289
EVM0006196	12.5865	13.635	14.7855	6.67842	5.65603	5.19203	1.38204	1.25416	1.65554	4.71551	3.69904	2.64968	2.82777	1.83697	3.19951	4.36377	4.36125	3.80354	1.37537	1.0752	0.898248
EVM0003315	1.93784	1.29823	2.10228	45.4371	45.7875	49.5291	3.39737	5.04946	3.29809	0.279883	0.0923795	0.720813	4.84633	7.66245	5.34804	6.57555	8.37417	7.02565	6.67861	7.24485	6.2822
EVM0005221	12.0094	11.9034	11.2723	8.13519	8.8964	8.36101	5.60351	4.80032	6.11666	2.82135	3.26921	3.77221	3.9845	2.22935	3.31044	1.67378	2.22654	2.14377	0.926858	1.21607	1.12061
EVM0027543	0.0780482	0	0	0.604702	0	0.144113	0.292936	0.208867	0.222691	0	0.28277	0.36773	0	0	0.207217	0	0	0.221704	0	0.0964183	0
EVM0005239	34.9458	34.1608	33.0563	34.8064	36.5839	36.4382	72.7814	67.7865	67.939	49.2022	54.6158	51.1383	60.551	63.8336	57.6241	74.1293	82.9026	78.0998	49.2679	56.9687	53.0706
EVM0009438	13.9724	9.67586	9.66404	49.36	50.2093	47.3214	71.1909	72.6529	73.9498	34.0382	33.2455	36.2929	53.7027	54.3897	50.8396	44.9308	39.988	48.43	29.7451	22.3589	25.6075
EVM0012142	36.9577	40.765	40.5828	3.0662	3.2333	1.91005	20.6186	17.4767	18.6929	112.859	119.248	113.605	15.8052	17.038	13.7321	16.301	17.6122	15.4045	9.65948	11.1527	10.1319
EVM0014317	132.236	144.849	140.497	75.9548	76.9605	70.4317	18.8893	21.3249	21.739	76.6497	72.0615	71.9667	30.8891	35.0704	32.6254	26.742	25.4991	27.4603	25.4705	27.408	25.0655
EVM0011101	71.4189	69.7183	68.1708	38.4307	37.3722	41.0588	19.5969	22.5757	23.6414	34.9867	37.1289	39.5151	28.4314	29.7493	26.9094	27.9685	30.678	27.3948	28.3404	28.4315	28.121
EVM0004857	85.8953	90.3926	88.7321	48.8542	50.6901	49.7012	19.4944	22.2326	19.4942	41.3643	41.4283	44.9419	17.5799	18.7048	15.1928	18.0248	15.6943	16.9912	18.6882	15.7149	14.2997
EVM0000440	1.69218	1.68276	1.55712	0.614561	1.55841	0.58585	1.19085	0.754748	0.301762	0.096742	0.0957935	0.19932	0.697977	0.552739	0.561588	0.449575	1.00472	0.600849	0.678963	0.261307	0.51599
EVM0016226	1.42739	0.567776	1.2259	7.25753	6.48513	3.95342	8.20345	10.3455	10.8605	28.5614	27.4733	36.1482	4.94557	4.19622	5.68454	8.09016	8.71717	6.33536	6.41446	8.59631	7.39921
EVM0015830	0	0	0	9.29664	9.53122	9.81527	0.193702	0.460375	0.392675	1.22741	1.40235	1.45896	0.681194	1.21376	0.959148	1.60881	0.840481	1.7592	0.53011	1.14761	1.13306
EVM0014440	9.48523	11.4406	11.7878	14.8165	13.8264	13.4887	21.3891	25.0426	21.5346	12.6647	11.6398	10.9564	15.6496	17.9901	22.6445	19.5099	21.5929	19.0127	15.5179	12.2847	17.4471
EVM0015496	8.60275	7.23723	10.4821	8.04425	6.99385	5.75134	5.01027	2.91084	5.07844	11.1253	12.6284	15.3744	0.391548	0	0	0.840669	0.805177	0.421327	0.761764	0.366468	1.44729
EVM0019895	0.217188	0.345566	0.852709	1.68273	3.30699	1.70437	4.99287	3.87482	6.19691	0.894	1.18031	0.511649	6.16339	5.95922	4.90136	8.46299	8.40044	7.09484	4.60119	3.35383	5.0332
EVM0010848	0	0	0	0.287295	0.29141	0.219099	0.0556697	0.105849	0	0.10854	0.0537378	0.447256	0.0783096	0	0.0787593	0.168134	0.161035	0.252796	0	0.0732936	0
EVM0004603	0.144077	0.305654	0.212125	0.0697675	0.283068	0.332541	94.0922	96.3925	105.718	1.4497	0.91349	0.950363	46.7817	45.3677	43.6076	54.202	55.4332	49.828	87.4073	89.3501	85.0542
EVM0020400	1.67374	1.89375	2.35473	0.486292	0.438452	0.515083	0	0.0995368	0	0.306202	0.3032	0.105146	0	0.0728957	0.222188	0.869592	0.151432	0.0792404	0.429802	0.275691	0.136098
EVM0011078	0.973722	1.89357	1.27432	0.157171	0.318845	0.0998855	328.004	357.43	376.816	0.841204	0	0.866579	189.857	185.889	175.077	276.021	258.42	233.416	255.114	244.925	245.383
EVM0014150	51.929	51.9281	56.7519	6.81267	7.19117	5.6496	0.751279	0.714231	0.815894	2.14485	2.02022	3.66462	1.81168	2.16699	2.88496	1.53969	2.32845	1.29964	2.27634	2.19019	2.58096
EVM0018329	35.2281	38.1691	36.6968	24.6385	24.1077	24.7499	28.3957	27.5732	27.2077	15.8651	17.274	17.4966	26.265	26.4227	25.8426	22.7404	23.05	24.4806	25.2723	27.2498	22.2959
EVM0006594	12.9892	11.7726	12.0944	3.85576	4.04209	4.18898	7.28355	8.78939	6.79034	2.99072	2.96139	2.82943	7.22186	9.03782	6.37756	6.7128	6.3992	7.42362	8.19598	8.16058	8.62682
EVM0012103	0.500809	0	0.140446	0.0692887	0.632532	0.264207	0.335655	0.638206	1.2248	0	0	0.0674172	0.566593	0.654346	0.379898	0.912374	0.582569	1.62583	0.551158	0.618684	0.872629
EVM0017797	9.32048	11.6279	13.6706	21.2844	19.1443	18.53	48.0509	49.2243	46.5389	14.5808	14.9175	18.2643	108.763	101.437	101.584	100.701	116.214	125.233	67.5189	67.1881	69.1784
EVM0022162	0.323615	0.858169	0.370579	4.38777	3.54991	3.78443	2.73288	3.03113	4.82195	1.6281	0.635083	1.42309	4.34262	4.6511	5.36995	6.41966	7.31979	6.2816	7.06363	6.19664	5.46022
EVM0027956	1.10568	0.92151	0.077519	2.29463	2.24991	2.84366	40.5358	43.5389	47.3218	3.17867	2.36063	3.27455	10.4243	10.8349	10.3794	12.5336	13.505	12.6754	26.9734	27.4161	29.0914
EVM0020228	0.482698	0.325826	0.818355	6.67222	5.08663	5.14513	4.24101	4.11016	3.92309	7.94762	7.82995	6.20255	5.90783	6.59349	5.00972	8.64277	6.55084	8.10225	6.31032	7.96886	7.27908
EVM0016341	27.559	33.2596	29.6723	0.408523	0.0690626	0.843783	0	0.0627139	0.200594	0.128617	0.191033	0.198744	0	0.183714	0.37331	0.0996169	0.190822	0.199704	0.361067	0.173702	0.0857497
EVM0011262	0	0	0.0994827	0.098159	0	0.467867	0	0	0	0	0	0	0	0	0	0	0	0	0	0	0
EVM0020135	0.103364	0.877132	0	0.600633	0.203079	0	10.3777	12.0789	8.84771	0.472748	0.187245	0.58441	15.4168	12.4249	16.4658	22.7016	23.4265	25.8382	23.4906	26.5601	26.3495
EVM0010344	4.51259	5.40207	6.6439	24.2866	26.7876	22.8544	0.907337	0.632568	1.47149	2.24079	1.51814	2.36913	2.29741	1.17921	2.22502	1.27883	1.39981	2.01433	0.74494	0.876026	0.94355
EVM0025295	13.7975	13.874	17.5351	17.2245	13.7106	16.4934	60.6161	69.3657	73.5773	62.3019	68.9148	61.8514	42.318	45.5376	49.8663	62.9455	59.422	64.3401	53.6581	47.8835	54.8641
EVM0000400	0	0	0	1.07315	1.24403	0.68201	1.98044	0.941389	1.35499	6.75725	5.44839	5.27053	0.626817	1.10308	1.26083	1.19627	1.28898	1.42392	0.880737	1.69481	1.15846
EVM0012286	0.250774	0	0.123071	0	0	0	0	0	0	0.114694	0	0	0	0	0	0	0	0	0	0	0
EVM0018048	29.4169	27.2729	22.7872	48.1172	51.5552	49.2904	3.33499	2.63086	2.66114	16.8091	14.7264	18.9551	4.59146	3.65581	4.51744	1.8216	2.36046	1.9333	6.31119	5.88551	5.25748
EVM0019549	48.4502	48.4031	47.379	22.1838	22.266	20.926	13.5034	16.9028	13.8012	16.7291	16.728	14.8041	19.7865	17.0012	19.4226	16.5682	16.0314	17.3738	14.2432	17.4821	15.8708
EVM0011500	56.3787	56.2559	55.4335	32.619	31.4799	30.4642	16.1222	16.3287	15.3435	19.78	19.9398	20.1697	18.33	20.0262	20.12	15.5968	16.2632	17.2629	18.9274	19.3569	17.7719
EVM0000574	23.6811	24.6565	26.9139	47.921	50.7502	48.0988	22.6881	19.9016	19.4999	41.6131	39.0037	38.1117	17.5204	20.6003	19.6892	17.0424	17.5915	16.3745	19.9236	18.8617	18.9266
EVM0002144	0	0	0	6.68269	5.23787	6.75658	1.5696	3.91701	2.98304	2.5821	1.60982	1.37925	2.62191	1.36601	1.52667	3.11096	2.27018	4.45472	1.61084	0.387469	1.27519
EVM0011786	41.8717	45.5749	42.0038	62.9464	63.216	58.4611	61.5096	65.3075	65.1007	47.9939	49.9326	49.7247	58.8061	57.7074	54.189	64.7708	62.0944	66.051	35.7216	31.5343	33.4108
EVM0011684	6.57324	6.71419	9.55831	18.5086	20.687	18.543	66.1322	55.0529	65.7585	20.9887	20.2868	23.1704	15.9062	18.9264	16.8863	16.2995	18.4197	15.6464	3.59471	2.25566	2.44977
EVM0010478	0.46869	0.149146	0.690054	0	0	0	0	0	0	0	0	0	0	0	0	0	0	0	0	0	0
EVM0024901	1.49483	1.44147	1.55615	0	0	0	0.0425039	0.282855	0.129246	0	0	0	0	0.0591853	0.0601328	0.192556	0	0	0	0	0.110501
EVM0007529	6.80627	4.26899	6.21586	0	0	0	0	0.211183	0	0	0	0.0557709	0	0	0	0	0	0	0	0	0
EVM0021241	3.73848	3.48965	2.93556	0	0	0	0	0	0.142224	0.0455956	0.0902972	0	0	0	0	0	0	0	0	0	0
EVM0012318	0	0.0476057	0	0	0	0.0414347	0	0	0	0.123159	0	0.0845825	0	0	0	0	0	0	0	0	0
EVM0002459	3.17785	2.20637	2.26849	0	0	0	0	0	0	0	0	0	0	0	0	0	0	0	0	0	0
EVM0019238	0.873678	0.585307	0.496473	0	0.180685	0.0849059	0.0862933	0.0410189	0.0437337	0.0420617	0	0	0.0606937	0.120161	0.122084	0	0	0	0	0.056806	0
EVM0021734	10.0287	13.6707	12.6081	7.19144	6.0368	7.24947	5.60603	4.3398	6.41289	3.86459	3.47882	2.69432	1.23922	0.9479	1.13303	0.846569	0.810827	0.606119	0.93149	1.21256	1.30129
EVM0002704	56.3546	60.9145	60.4595	12.8656	11.4699	11.5496	2.01229	0.743966	1.92635	28.717	24.1188	24.6433	3.2238	3.34689	3.95404	4.47373	4.52739	4.73812	3.44193	3.45886	2.25245
EVM0006273	0.0299201	0.0317371	0.0293676	0.0289768	0.0293919	0	0.056149	0	0.0284565	0.0547372	0	0	0	0	0	0.127186	0	0.0424955	0	0.0369623	0.0364937
EVM0008242	175.435	164.392	180.998	5.59209	6.69802	5.6144	12.5074	16.1099	16.884	2.4723	2.00296	0.984019	24.891	26.4052	25.4416	18.9745	20.4242	21.2004	14.1965	11.0792	11.7629
EVM0006254	41.1769	50.3987	43.9732	37.4954	35.044	35.9942	42.2733	39.964	38.9599	34.8472	35.9622	37.4139	40.5642	41.1924	38.0705	50.4931	49.8076	54.9056	45.1069	43.4956	45.284
EVM0013232	4.69797	5.73077	4.07324	1.89577	1.53835	0.939749	1.10204	0.558773	0.521285	0.0716223	0	0	1.86027	2.86452	2.07884	1.55325	0.956363	0.77846	0.804265	0.580372	1.52804
EVM0001681	69.6425	76.2739	74.647	45.8888	45.329	42.0883	81.6232	84.4203	84.603	55.6918	51.6242	55.6808	65.3042	64.7559	62.9567	84.0901	73.1758	79.8587	67.3652	65.3965	72.4885
EVM0005519	0.465551	0.123456	0	1.8035	2.744	1.50434	5.35122	7.6829	6.08819	0	0	0	6.91298	4.86622	4.0171	3.1334	3.79088	2.47958	1.64381	1.5816	0.851753
EVM0017265	4.48069	5.01362	5.30972	3.09581	2.84493	3.78357	10.3569	8.99319	10.0561	6.0979	5.93913	5.71545	8.11389	8.10329	8.4869	7.70388	9.82581	10.5548	6.48968	7.05413	7.19797
EVM0027234	30.4445	32.1312	26.2785	21.9284	21.9419	22.3164	9.3308	7.233	8.58473	5.87753	3.32566	3.02741	43.4151	43.9758	44.8829	25.5796	27.1988	33.6797	22.9823	21.9235	20.1528
EVM0023017	16.3295	17.4041	16.5265	24.0626	19.4184	20.9548	9.5306	10.9076	11.6666	7.32557	10.4383	7.98829	11.8596	10.6679	11.2536	10.1299	9.06599	8.93312	7.62416	7.72172	9.48214
EVM0006267	0.0984819	0	0	0.190754	0.290231	0.0909215	0.184814	0.175701	0.0936644	0.0900837	0.178401	0	0.129988	0.128674	0.130734	0.418633	0.267306	0	0	0.486646	0.120119
EVM0018242	0	0	0	0.574589	0.194274	0	0	0	0	0	0	0	0	0	0	0	0	0	0	0	0
EVM0021318	32.3412	31.3732	35.2712	16.0624	14.9348	12.2496	2.07496	2.4658	3.94349	41.9728	36.0532	34.9037	2.18911	1.08349	0.733894	1.17503	1.8757	0.3926	2.48439	2.04889	1.01146
EVM0009410	36.5901	39.3201	40.8821	49.81	43.6706	43.3156	62.0563	65.3411	63.9414	55.7414	50.4249	47.3045	59.5799	51.3822	57.9246	40.702	40.283	41.7694	133.213	141.521	129.216
EVM0002175	3.22853	2.5005	3.42042	5.6083	7.50095	6.95492	4.90472	6.49142	5.80003	0.0468764	0	0	13.19	12.3871	11.565	9.73028	9.87585	12.4463	4.93488	4.36828	4.75044
EVM0010391	0	0	0.185804	0.274998	0	0.0873837	0.444058	0.084432	0	0	0	0	0	0.123667	0	0.134115	0.128452	0.134431	0.364579	0	0
EVM0001574	4.48017	3.56419	4.52429	5.92431	6.22077	6.72137	15.6835	15.7939	18.601	6.81706	8.70115	6.3326	11.5994	10.4691	10.122	12.147	12.5111	9.0553	6.80326	6.12006	6.2001
EVM0006414	0	0	0	0.234799	0	0.14922	0.0758291	0	0.153722	0	0.146395	0	0.106668	0.10559	0	0	0.109675	0	0	0.0998351	0
EVM0006572	11.5407	13.9213	14.041	14.2961	12.0225	14.2724	20.5245	20.3503	20.7272	14.0673	16.0443	15.3768	19.4838	18.6908	18.5981	18.9007	20.5067	22.7572	19.3321	21.6177	20.5907
EVM0025124	5.7503	7.63537	7.30894	14.4234	13.5327	15.5446	29.3459	24.8358	25.1417	9.91441	8.88045	10.5253	41.2804	43.2956	39.156	45.3704	42.6689	46.7702	67.2982	68.8399	72.7102
EVM0014083	7.12591	6.91078	5.88094	9.12656	10.1145	9.93541	52.8904	48.4401	47.1647	40.546	39.5426	38.8639	40.6935	44.0446	42.0855	50.1145	49.8144	48.126	54.6347	56.1243	56.5835
EVM0002817	0.357721	0.664029	0.131668	13.468	16.5161	15.0681	14.8528	17.3512	19.1375	17.9969	15.7144	14.6211	9.3842	9.17253	9.55681	7.34968	7.28211	7.1765	30.2563	29.6084	29.3967
EVM0006491	5.27607	2.56225	5.11626	10.0348	12.0519	10.7397	0.656107	0.283524	0.181373	14.711	14.9122	14.7355	0.503419	1.24583	0.928235	1.261	1.03523	0.722275	1.14265	0.314115	0.775333
EVM0021282	1.6971	1.1251	1.11051	0.273932	0.486249	0.587553	1.26066	0.946178	1.95034	0	0.256192	0.666333	4.76004	3.51086	5.72608	3.40667	3.16687	4.21817	2.179	2.97009	2.5012
EVM0009556	2.45936	1.97902	1.95613	10.6771	11.4966	10.0609	12.4932	11.0828	10.4451	4.53805	4.72399	4.39524	10.0742	11.1359	8.78114	10.9351	9.72528	10.5995	12.4675	13.672	14.7399
EVM0013859	725.202	765.098	761.46	190.896	185.92	196.647	45.1482	44.8364	45.8234	241.456	247.793	238.929	69.2597	69.8155	69.3172	50.1579	44.3013	51.3682	75.3524	70.5221	68.9638
EVM0010612	0	0	0	0	0	0	0	0	0	0	0	0	0	0	0	0	0	0	0	0	0
EVM0016034	40.8087	38.7705	41.4621	39.2364	37.5621	37.3255	34.85	36.328	37.6898	32.894	36.2372	31.4629	50.3027	47.8666	53.6137	53.1647	55.726	56.6433	52.7756	50.5179	48.0778
EVM0003978	0.459789	0.418039	0.128943	15.0764	14.8407	14.6753	32.8501	35.1559	34.1717	4.02555	4.04557	4.27077	28.6101	26.7763	27.2921	21.9649	21.2158	18.2851	14.8431	13.4699	16.2634
EVM0001674	0	0	0	0	0	0	0	0	0	0	0	0	0	0	0	0	0	0	0	0	0
EVM0005249	0.208203	0	0.408717	5.64589	7.26073	5.47824	1.17216	1.02149	0.891082	0.47612	0.471452	0.196193	4.53436	2.72033	3.45485	2.2126	1.97791	2.21783	0.668309	0.771621	1.3967
EVM0024849	0	0	0	2.83926	2.56859	2.04825	2.97389	4.09949	2.86363	3.04406	2.87068	3.50921	2.50999	3.51989	2.41922	2.46998	3.54855	5.28923	2.44161	3.32805	2.80265
EVM0003170	16.8995	14.0045	14.0428	34.3143	33.957	32.5783	4.00932	4.71097	4.0182	20.1134	14.9589	18.051	5.38636	4.32828	4.6525	7.00687	8.79602	7.36435	4.68485	4.56686	4.15762
EVM0000014	14.9146	14.9511	12.4272	19.7619	18.4349	20.9571	14.5329	12.61	14.185	12.1061	9.05547	10.9654	0.811237	1.01718	1.5774	0.696703	0.389252	0.407369	0.736528	0.556801	1.04951
EVM0025028	516.496	495.657	520.983	298.403	306.911	323.882	32.9334	30.4494	30.2536	702.478	696.72	670.665	74.6168	72.3812	79.7121	37.0384	37.9371	36.8037	26.8641	28.089	25.2432
EVM0017981	8.55962	8.10664	6.81555	20.6398	23.295	20.4013	12.3343	13.8297	10.3007	48.9355	51.8179	47.1606	20.5208	22.9382	21.8561	18.8736	18.7287	18.4839	16.7096	16.347	17.6845
EVM0011582	4.95427	6.81749	5.25707	2.52872	3.28839	2.90507	10.6166	9.97358	13.0533	0.857365	0.606399	0.567789	6.98105	7.26041	7.73214	9.67618	8.63164	8.93832	2.66477	2.89476	2.12313
EVM0013287	4.93305	6.67612	6.01071	1.64742	2.00523	2.0416	0.478837	0.606965	0.80892	1.71159	0.46222	0.641171	0.898096	0.889021	1.35488	1.44619	1.61598	0.7248	0.873631	0.420285	0.829913
EVM0010767	0.320066	1.01851	0.942468	0.154988	0.314416	0	0	0	0	0	0.289901	0.150802	1.26738	0.209095	0	0.22676	0.434372	0.227295	0.410951	0.1977	0.390387
EVM0009818	953.353	954.942	991.598	147.374	144.355	145.73	47.808	47.3138	43.794	311.786	309.017	304.289	53.2851	56.7813	52.8075	27.604	27.7944	26.1857	45.6532	50.433	54.0031
EVM0022420	4.72796	5.52387	6.52383	5.30888	5.31762	3.60587	78.5037	89.6689	95.0821	6.07976	6.70285	5.42376	108.531	104.927	117.795	101.072	99.8736	105.106	31.0563	34.2828	40.3671
EVM0004078	32.0639	35.2393	33.8322	25.3313	23.2151	22.3388	38.5269	41.2087	41.4794	26.8311	24.6588	23.2203	45.8876	48.1005	45.2052	54.3094	53.064	56.8411	41.0543	39.0239	42.44
EVM0022134	7.59253	7.63944	7.79301	6.7229	8.48139	5.52761	7.49058	8.12745	8.74788	10.5962	11.3568	10.4252	9.3343	9.23998	7.77526	8.42219	7.00676	8.75017	8.63438	6.69969	7.56728
EVM0020070	3.43462	2.87858	2.78852	4.59939	3.12407	3.09265	6.56488	6.12767	5.72665	2.59871	2.61164	1.7581	5.9326	6.75909	7.09246	8.11117	6.21497	7.70874	7.2954	5.44783	4.86157
EVM0020317	7.35156	10.3783	10.2931	10.0515	11.523	14.1732	9.68776	10.2226	9.30546	8.10913	9.10677	7.53874	8.4905	8.05157	9.54388	7.73603	8.3631	8.36849	7.07932	8.01343	8.17557
EVM0016202	30.7447	30.8274	32.5114	29.3822	32.4814	28.5451	51.7091	61.423	62.5641	20.7472	18.0744	22.4663	73.0446	70.0327	67.5346	87.7851	81.0873	89.3106	77.609	75.532	74.999
EVM0008943	257.693	247.691	253.455	76.5812	86.587	85.2932	34.0876	39.1245	39.444	128.071	122.444	119.89	57.6105	58.4835	57.8005	31.2612	28.9337	29.0752	38.8815	40.817	41.9813
EVM0017115	6.60251	6.63487	7.67438	55.1934	54.96	52.3476	41.5733	38.2316	42.0839	67.9175	68.9303	68.0561	65.8957	71.5863	78.4218	53.0963	57.6142	52.3168	35.0992	39.8525	39.6298
EVM0026236	17.4481	18.467	17.7281	21.0946	20.1914	19.4365	21.7691	26.3056	23.0865	14.3466	13.1292	12.4667	19.0313	20.7931	20.6169	21.6259	20.6088	21.2413	20.4331	22.3127	19.3171
EVM0004186	41.6297	43.374	37.4156	3.57846	4.77913	3.58184	2.94697	3.07632	3.86561	14.5897	11.7693	12.8246	7.96577	6.67835	5.39551	5.84638	5.76669	6.5599	3.87439	4.79284	4.43163
EVM0028033	0.132682	0.985178	2.34418	0	0.39102	0.244992	0.497991	0.355075	0.378575	13.5931	17.1854	14.8784	5.60412	5.72085	6.34084	2.06805	1.0804	1.13069	3.74788	2.45867	2.75116
EVM0008489	5.15537	7.35412	5.75812	0.172167	0.5239	0.164124	0.250208	0.23787	0.0845376	0.813057	1.28814	1.0051	1.75982	1.16136	0.589975	0	0.844406	0.378732	1.82601	1.97652	2.05987
EVM0004504	0.453261	0.480788	0.741486	0.438972	0.29684	0	0	0	0	0	0	0.142372	0	0	0	0	0	0	0	0	0
EVM0010842	5.47467	5.76365	5.9371	8.20134	9.60794	8.34824	2.52039	2.50584	2.94471	3.33854	3.93725	3.32331	13.9109	13.9043	13.8547	17.9262	16.0006	16.8036	15.6381	16.8954	15.5808
EVM0017791	12.9821	13.5271	12.5815	16.3193	17.4226	16.7675	26.2083	24.7404	23.291	90.2021	91.9308	89.5559	33.1022	31.7825	32.7265	33.7707	32.9677	28.5889	22.7718	21.91	21.9122
EVM0015521	21.4856	25.4378	24.9765	41.9318	40.0274	42.9282	69.0337	71.2921	73.6368	32.9045	34.8425	32.9768	68.9643	65.0774	66.9835	63.579	56.8449	64.8079	50.5058	42.562	52.6108
EVM0009565	0.899341	1.77164	1.07189	19.1617	23.2225	22.3588	1.98911	2.40676	3.42139	0	0	0	8.90289	9.14866	9.12457	13.3804	14.2976	10.9486	11.0523	8.96749	9.01051
EVM0008605	0.317559	0.0673689	0.187017	0.430567	0	0.351816	1.0727	1.13311	0.906075	0.0580957	0	0.0598482	1.00596	0.746848	0.843115	2.15984	1.12052	1.98453	0.244639	0.784605	0.542261
EVM0007734	99.31	105.997	105.772	76.3145	67.485	76.2226	39.7979	41.1454	40.3394	95.8381	100.873	90.8133	45.1674	47.8084	51.584	36.147	35.8099	33.6705	53.4655	55.7714	49.91
EVM0020823	24.3077	21.8172	25.2863	0.503021	0.612273	0.479522	0	0.18533	0	0.760165	0.752712	1.02781	0	0	0	0	0	0	0	0	0
EVM0002452	38.225	40.0199	41.5391	4.32701	2.43833	1.94785	0.116452	0.553546	0.118036	1.9299	2.69786	2.80676	0.327622	0.486467	0.164752	0.175854	0	0.176269	0.318697	0.459955	0.151374
EVM0007244	110.883	110.819	113.768	96.4192	95.5111	95.4448	40.4897	40.3446	42.3567	77.5775	78.4001	80.8785	52.7265	56.8089	52.1108	48.8117	54.8557	48.4614	37.6845	41.7466	36.9091
EVM0016435	6.06562	5.70436	5.83087	17.0782	16.6471	18.4741	31.9192	33.4689	33.2456	15.7299	11.7809	12.7278	29.2181	28.2693	31.1292	28.6195	28.9387	28.243	22.1597	26.8831	22.0423
EVM0022109	0.744644	0.493666	1.41611	14.5135	13.5327	15.2104	10.0876	11.2508	9.738	12.3031	14.501	15.9634	20.2102	22.2559	17.7932	11.1448	13.0112	10.444	6.99141	8.39417	6.86862
EVM0014809	1.43739	0	1.51937	0.642495	0.868933	0.71456	0.51874	0.887687	0.525798	0.101139	0.500739	0.10419	2.91881	2.45592	3.66947	1.41003	2.40089	2.19856	2.27144	3.14163	3.77611
EVM0015420	0	0	0	0.949926	0.867181	0.905548	2.48493	1.74992	2.23888	0.358882	0.355363	0.27728	1.94195	1.40971	2.21352	2.22371	1.06491	1.3931	2.26686	1.33288	1.31598
EVM0014147	0.667825	0.450789	0.655494	6.17373	3.81694	4.31589	37.6548	44.2465	37.5898	0.222136	0.164969	0.686511	31.6529	25.6217	25.3065	21.0762	18.7033	22.678	39.2872	38.6255	37.5434
EVM0016997	1.2112	1.50959	1.54549	0.674487	0.386693	1.11822	2.44346	1.80975	1.43995	0.498563	0.60338	0.228267	2.95757	4.39153	3.6579	2.44562	2.63002	2.4944	2.64373	2.0948	2.28984
EVM0011894	35.321	40.5739	37.4381	10.9296	11.0862	8.46543	3.86915	5.27552	4.2314	17.1719	15.0869	20.3996	7.01817	5.31678	6.8424	4.38211	4.41799	3.93009	3.76181	2.94918	3.37503
EVM0011698	22.8668	26.8292	29.914	14.0281	16.5765	15.2055	22.5256	19.0864	18.951	22.9008	23.7751	21.8595	14.6544	17.5805	17.5203	18.0238	18.9592	17.4398	10.1957	11.8536	12.4208
EVM0002658	1.80408	1.38739	2.25773	4.76114	6.06991	6.16265	8.25239	7.36264	7.03491	2.59912	2.73704	1.99752	3.51232	3.94826	2.69427	3.57882	3.97861	4.54814	3.41664	2.45157	2.20045
EVM0004385	0	0	0	0	0.150287	0	0.0717754	0.545887	0.145504	0	0	0	0	0	0	0.108388	0.103812	0.325932	0.0982148	0.283494	0.1866
EVM0025775	1.03879	0.688673	1.01961	0.377266	0.382671	0.539462	0.0609197	0.289578	0.185246	0.593879	0.294028	0.734152	0.0856947	0.0848288	0	0.36798	0.440555	0.184424	0.333441	0.0802056	0.158378
EVM0017545	8.68621	9.21373	8.98017	8.72883	9.73659	7.31548	57.2573	59.0974	62.5684	4.73242	3.94612	5.79889	60.7037	59.6278	65.0646	58.5689	55.2462	59.442	14.7188	14.1618	14.4804
EVM0015014	0	0	0	3.15728	4.1879	2.72038	0.588262	0.447402	1.25216	1.08959	0.567848	0.827077	0.413749	0.65531	0.6658	0.444168	0.510499	0.979477	0.160991	0.154899	0.229403
EVM0006841	2.98196	3.07519	4.55294	2.88795	2.35973	4.05307	3.65297	4.35951	4.96315	23.2609	15.9804	23.6504	10.3865	8.54989	11.3258	6.33794	5.95794	5.76467	3.19059	2.66053	3.23299
EVM0000578	3.20712	2.73266	4.02518	1.6803	0.826362	1.74742	3.05862	2.53259	2.05016	1.10612	0.238103	0.594515	3.46977	3.98426	4.95537	2.38392	1.85515	1.41879	1.08008	1.29901	1.73143
EVM0025216	4.39334	4.59963	4.25621	0	0	0	0	0	0	0	0	0.161295	0.301238	0.0745485	0.227226	0.404231	0.232299	0.405185	0	0.281942	0
EVM0003237	18.8685	17.5802	15.2665	82.7252	92.8273	84.934	30.1935	32.0709	31.0893	40.9561	41.8941	49.688	29.6165	25.9857	28.8388	28.3255	28.929	29.189	14.4048	16.7576	15.861
EVM0027087	0	0.140484	0.129996	5.00237	2.60207	5.38004	0	0.236287	0	0.121147	0.599796	0.624007	0.174811	0.865223	1.40652	0.562989	0.35948	0.188106	0.170049	0	0.161539
EVM0015814	40.531	41.2564	39.8298	158.831	177.137	161.366	12.0597	18.5071	16.8935	60.8958	56.6799	64.5925	14.931	15.0317	16.3587	17.3929	17.8998	13.4686	11.9902	13.3205	11.2728
EVM0021875	2.90714	0.755189	1.80525	11.0321	11.4233	13.2555	13.9174	13.5487	14.2761	1.30248	1.34345	1.28586	19.4991	17.7517	18.7447	16.8975	18.1165	17.9485	1.75206	2.78516	1.88147
EVM0021743	26.4838	34.5325	26.1083	23.0168	26.4708	27.12	307.481	299.849	299.895	45.7531	45.8807	42.6652	239.963	260.279	242.876	263.258	279.767	292.05	61.3262	66.0775	61.1491
EVM0021700	17.0914	18.404	20.6393	19.2612	17.7055	23.2386	117.703	119.337	119.501	16.534	17.4978	13.9093	67.0623	72.8133	63.8722	69.0572	83.9247	72.4569	165.316	181.326	172.015
EVM0018491	8.15906	10.4097	9.18446	45.9191	38.8982	45.8809	51.449	60.8217	54.3739	0.260954	0.206716	0.161295	17.0953	15.6552	15.3756	10.7526	11.3826	13.5332	12.3073	14.52	16.0062
EVM0023705	0	0	0	0.549284	0.185717	0.232721	1.18262	0.44972	0.719226	0.807019	0.742027	0.77198	0.748608	0.576367	0.836563	1.07153	0.855239	0.895047	0.323651	1.01206	0.61491
EVM0013449	63.8615	69.2271	70.4152	16.0036	16.0689	13.8382	4.63591	5.92603	4.95299	21.9555	19.2306	24.0333	14.2322	16.1384	14.181	16.5557	15.9927	17.1638	7.75807	7.54696	7.45128
EVM0021928	1.48065	1.00965	0.51904	0.409707	0	0	0.297712	0.377374	0.8047	0.677194	0.287381	0.0996602	0	0	0	0	0.143531	0	0.135793	0.130654	0.257995
EVM0006353	12.6198	11.7371	12.1623	13.7275	10.9147	16.4211	16.7752	21.7806	19.4822	13.0074	9.77382	12.6243	15.9931	16.6082	16.0243	15.2901	15.0168	15.456	11.6241	11.2971	11.4328
EVM0021760	27.3396	29.3536	28.3483	37.5774	39.1392	37.8226	23.6588	22.5665	23.188	31.832	29.6325	30.2003	21.2335	22.707	21.7427	22.6765	21.4363	22.0789	22.5279	21.9843	22.7223
EVM0022230	41.9832	53.707	48.5255	44.7387	40.5341	43.1061	32.0389	31.8654	30.6755	43.1828	38.9241	45.1009	26.1909	28.7808	24.3381	23.457	23.0474	24.0242	17.3802	15.9434	16.7028
EVM0008992	9.30777	8.17884	8.48719	29.6566	30.4061	28.0678	111.677	105.187	111.887	41.2099	44.0983	43.3353	63.6081	67.9306	66.0936	83.4242	71.6054	86.4372	63.5018	59.3977	65.8997
EVM0005202	4.86105	5.91084	5.52772	19.635	23.6433	24.4096	28.0904	33.1038	29.3746	14.9663	12.9403	12.3454	33.0198	35.7844	32.029	54.6831	50.8458	55.3174	29.7608	27.9754	36.442
EVM0011301	43.73	42.496	46.9719	28.1455	28.0984	31.4858	140.13	128.231	137.677	42.8521	41.8507	41.4667	71.3936	83.0099	80.6877	74.4341	84.8531	70.7035	32.4879	31.3717	28.8494
EVM0013631	0.695001	0.276453	0.341084	8.49777	11.5211	6.9779	0.163033	0.852461	0.578378	0.397333	0.0786875	0	2.29335	3.40527	2.53718	2.83125	2.35802	1.1105	0.111544	0.321968	0.529811
EVM0007336	0.0389616	0	0	0.4528	5.43489	0.467617	0.109675	0.139022	0	0.0712782	0.0352897	0.0734283	0.102852	0.407251	0.0517213	0.0552068	0.211504	0.110674	0.050025	0	0.0950435
EVM0027598	4.62623	3.48252	3.51546	0	0	0.137777	0	0	0	0	0	0	0	0	0	0	0.202529	0	0	0	0
EVM0023038	15.4954	16.7696	15.2093	21.6992	15.2219	19.3322	0	0	0.298732	0.861934	2.46562	1.77587	0.552774	0.410391	0.972909	0.296707	0.56836	0.297407	0.537715	0.388025	0.255404
EVM0016200	28.1929	32.0205	30.6975	54.5203	55.0342	50.8016	0.0850605	0	0.603525	13.2675	10.8384	10.5925	0.119653	0.592221	0.361021	0.5138	0	0.128753	0.581968	1.11989	1.10569
EVM0021887	13.5015	11.5992	10.2951	57.1664	54.5873	59.0285	0.418799	0.497684	0.742871	1.53101	1.71813	3.89041	0.14728	0.145791	0.296251	0.158108	0.605729	1.26785	0	0.137846	0
EVM0021373	0.429265	0.379445	0.351116	8.17607	6.53616	7.46385	0.805573	0.702027	0.476311	0.0654431	0	0.134834	1.98308	2.80434	1.89949	2.63575	2.91284	3.45488	1.28604	0.618684	1.04716
EVM0024102	9.74078	5.99389	6.07461	4.58655	2.90766	4.76976	38.4786	36.9651	40.4353	12.5037	13.7459	12.2216	8.09777	6.39869	8.50148	25.8506	27.2424	24.4593	21.2131	23.2691	20.8736
EVM0006215	2.77623	2.77655	1.40141	10.3707	10.831	10.1059	10.1966	9.12774	10.0336	2.53948	2.08351	1.64439	18.636	15.9604	15.1629	17.421	13.8867	14.6457	18.2302	15.6784	17.3179
EVM0005465	0.622491	0.0507919	0.187999	8.25463	7.47915	8.09004	45.1998	43.9106	52.6461	6.35108	6.33218	6.18168	21.6785	24.6502	24.4092	25.8506	27.1636	24.1434	14.448	16.6815	13.6082
EVM0023407	0.0615824	0.0653222	0	2.38564	2.5408	1.36451	0.982323	1.04375	0.937119	0.7323	1.00401	1.27666	3.00749	3.29894	2.69776	2.44326	2.25653	1.31198	1.58138	1.978	1.72759
EVM0020125	0.209298	0.222008	0.342388	6.48638	6.23663	5.92571	3.60043	2.80054	3.71577	3.25464	3.03316	3.35281	3.0388	3.55502	4.35285	6.22787	7.1011	4.85533	3.76221	6.03306	4.85035
EVM0013684	0.51059	0.958212	0.578264	39.2552	40.1648	43.4043	22.5543	19.5501	17.5568	37.5794	39.2032	40.7116	28.0461	31.3549	29.6149	29.5515	31.0223	29.4539	30.3582	28.9182	27.833
EVM0024967	3.33913	3.67071	3.93296	4.99778	4.0555	5.99741	1.87989	2.22045	3.17579	6.49749	4.28919	5.26325	4.40736	5.71133	4.83564	5.16151	4.77881	4.91501	4.67705	4.50005	4.81325
EVM0014019	14.9315	17.6548	15.0391	20.8037	22.4594	21.5238	15.3918	16.4552	14.5154	15.1147	13.6059	13.6738	28.1547	27.5954	26.0431	32.3531	34.249	33.1549	20.5987	22.7883	21.2169
EVM0026787	9.34656	10.6768	10.2619	15.2026	16.5386	15.7922	7.64567	8.81856	11.4821	8.16588	8.8727	8.8921	25.5432	24.8154	24.8945	30.9019	29.2313	30.2515	19.5394	20.0212	20.279
EVM0017774	1.70069	1.55798	1.06227	0.524069	0.379698	0.214108	4.78736	4.41336	4.19079	2.4042	2.03054	1.52974	1.02035	0.505019	1.23145	0.109536	0.839294	1.31754	1.29032	1.43249	0.848595
EVM0025628	0.187758	0.265547	0	7.03108	5.47182	4.79583	53.44	58.0625	67.8577	16.4876	17.5164	15.8644	17.4303	16.9271	13.7917	34.3196	28.7088	33.5118	32.3841	32.7049	31.2216
EVM0014207	0	0	0	0.517762	0	0	0	0	0	0	0	0	0	0	0	0	0	0	0	0	0
EVM0024048	1.74483	0.544352	0.705194	0.198803	0.705779	0.379031	0.288919	0.640899	0.585699	0	0.371857	0.677017	0.135472	0.134103	0.817502	0.436297	0.139292	0.583102	0.790691	0.760769	1.25187
EVM0013284	0	0	0.110536	0	0	0	0	0	0	0	0	0	0.297287	0.147141	0.149497	0	0.152834	0	0	0	0
EVM0001407	2.35554	2.35016	2.31204	8.22164	9.14129	7.79449	14.8152	14.0014	12.2441	4.97067	5.95701	5.53817	29.9521	28.4915	26.9972	19.3983	17.8196	19.7753	15.9605	14.6938	15.7308
EVM0010401	4.15064	4.58241	5.57057	45.5713	47.5139	48.291	9.49809	10.6921	12.6082	8.52318	8.40125	10.257	15.2056	14.8859	17.1483	13.743	13.795	11.6098	7.06941	8.37155	8.62703
EVM0002072	0	0	0	0	0	0	0	0	0	0	0	0	0	0	0	0	0	0	0	0	0
EVM0009194	0	0.173753	0.562731	3.41078	3.21827	2.41967	1.07591	1.97264	2.25898	0.37459	0.222551	0.463068	0.756729	1.28414	1.7396	0.928416	1.88959	0.814282	0.525796	0.303539	1.29866
EVM0011266	0.989493	0.437327	0	0.319433	0.810022	0.0761275	4.48754	3.75135	4.94072	1.13139	0.448119	1.39862	2.9386	2.37022	4.15956	2.68729	2.01431	1.05403	8.78739	9.26977	10.2586
EVM0019396	6.56095	3.67666	5.58926	0.5395	1.03365	0.685728	9.75707	6.07351	6.59321	0	0	0	15.359	13.9908	15.1186	8.77034	7.47605	7.82403	9.05975	9.558	10.3428
EVM0020931	89.2414	91.5325	90.006	48.9485	50.5277	48.6008	23.5654	25.9511	24.821	39.6097	36.0238	36.0882	71.9605	81.7431	76.9415	60.9776	63.8008	66.1992	29.205	37.0431	35.2108
EVM0007291	50.2936	55.1785	55.1726	43.5348	53.1194	45.1428	38.4008	47.7965	46.2702	44.6517	45.9259	42.1266	70.0712	62.4913	58.8007	62.9963	52.9757	61.044	64.0473	56.9536	54.6278
EVM0005148	33.6262	35.1366	32.2263	30.9884	29.2985	31.0061	20.3422	20.755	20.6587	40.311	46.3099	46.0143	12.2951	12.8804	12.5875	12.9623	10.4309	10.4418	12.5501	12.488	13.3996
EVM0007322	6.43534	7.83258	8.01711	7.31115	7.21327	7.84556	208.982	138.106	143.637	7.20725	7.17395	6.88044	175.653	180.023	183.617	235.446	237.263	219.128	369.809	398.316	368.964
EVM0019282	0.0964004	0.20451	0	1.96059	1.65723	2.04699	0.633178	0.773941	0.687636	1.58723	0.960466	1.13549	0.381721	0.503818	0.447898	0.887867	0.588726	0.821504	0.433209	0.416815	0.411531
EVM0015722	0.722526	0.970779	1.13469	14.9746	14.574	15.3868	5.15248	3.99606	3.98565	0.352486	0.654431	0.363118	7.5658	5.97889	5.05151	6.62048	7.97523	6.02039	5.93723	5.77205	5.58137
EVM0001762	53.2995	59.6001	54.2295	42.4382	44.5255	40.9798	72.0642	76.5705	71.1898	42.6571	40.5842	41.5943	148.033	145.634	133.972	194.911	175.827	197.931	111.225	108.724	110.568
EVM0019152	1.4145	1.6368	1.32527	0.684951	0.126321	0.296796	0.482634	0.114708	0.2446	0.294062	0.349414	0.484691	0.678913	1.00808	0.768164	1.73096	1.57063	0.913184	1.40339	0.794283	1.88211
EVM0000568	2.35989	2.59948	1.87087	0.351614	0.980792	1.34075	1.022	2.67189	1.7265	0.747224	1.4798	0.855293	2.03663	1.89746	2.4098	0.771659	1.10862	1.41805	0.699231	1.45767	1.21777
EVM0016983	50.9958	51.6898	51.3788	72.4017	69.4142	64.6583	134.46	155.003	165.262	36.9473	38.6369	36.6083	79.0162	84.9563	71.4717	112.281	113.166	104.399	66.0334	68.2385	66.9031
EVM0023710	0.0980848	0	0	0	0	0	0.184069	0.962456	0.466434	0	0	0	0	0	0	0	0	0.0696549	0	0	0
EVM0021782	37.2294	41.4082	38.7262	29.6797	28.3286	31.4178	48.3753	49.9188	51.1501	33.8001	35.8623	34.4265	40.6334	36.8306	38.0356	40.2704	36.5568	36.0194	30.0616	32.1886	32.7419
EVM0008488	0	0	0	0	0	0	0	0.076675	0	0	0	0	0	0.224611	0	0	0	0	0	0.106185	0
EVM0004572	0	0	0	0	0	0	0	0	0.0826254	0	0	0	0	0	0	0	0	0	0	0	0
EVM0026177	0	1.34038	1.2403	0.101983	0	0	0	0.0939351	0	0	0	0	0	0	0	0	0	0	0	0	0
EVM0015118	11.8653	10.2579	12.858	1.32847	2.156	1.39305	1.93065	2.14135	2.47876	3.19958	2.98184	3.7485	0.905271	1.4338	1.09256	1.74929	0.465398	0.974121	0.176122	0.169457	0.0836543
EVM0001929	57.7616	61.4882	59.204	93.7535	86.9154	86.5569	93.5421	104.486	107.01	37.2981	34.2811	37.5297	78.8525	78.4867	75.0363	83.8318	79.1734	87.836	51.8245	58.3181	52.198
EVM0001978	0.297372	0.252345	0.233505	0.287997	0.584246	0.549086	0	0	0	0	0.161608	0	0	0	0	0	0	0	0.229088	0.0734728	0.0725413
EVM0017366	30.0588	24.7886	28.651	0	0	0	0	0.154993	0	0	0	0	0	0	0.115326	0	0	0	0.223088	0	0
EVM0016337	2.97453	1.26207	1.68688	0	0	0	0	0	0	0	0	0	0	0	0	0	0	0.0938826	0.0848704	0.244976	0
EVM0004159	9.43477	8.98655	8.50459	12.6058	13.0134	13.5457	28.8348	33.9398	31.4613	8.98246	9.48735	10.9227	32.6322	35.2207	35.6312	40.1059	42.9072	43.5917	29.716	30.6371	31.0472
EVM0023901	0	0	0	0	0	0	0	0	0	0	0	0	0	0	0	0	0	0	0	0	0
EVM0009423	34.2818	29.6548	31.5099	50.9083	45.581	47.4995	43.0392	45.3735	43.2709	39.2344	37.1648	37.8636	38.9352	36.4585	36.3366	38.3334	35.7773	38.6504	45.6542	45.6337	44.5365
EVM0015019	16.0713	17.9394	15.637	6.92266	6.19573	9.23033	10.5648	9.29362	10.7085	7.86323	8.42087	7.96835	6.28984	7.20295	6.88413	8.80443	9.76418	9.09063	3.89904	3.52062	2.73521
EVM0025243	50.3096	55.102	57.2892	0.444095	0.70786	0.36287	0.245866	0.584354	0.498423	3.95479	3.32268	2.83951	0.605248	0.941493	0.521763	1.20667	1.06682	2.04688	0.841085	1.05203	0.559297
EVM0021832	0	0	0	0	0	0	0	0	0	0	0	0	0	0	0	0	0	0	0	0	0
EVM0000301	1035.16	1007.21	1090.99	197.721	187.492	195.881	110.777	88.6247	86.9523	388.667	401.096	388.638	29.4965	29.4813	27.8836	18.594	16.5159	13.1019	32.0293	32.0478	31.3774
EVM0016838	9.17372	6.26732	9.51304	4.81872	5.90603	6.55545	1.45896	1.24831	1.47881	2.27564	2.53499	1.26982	3.5573	3.18277	2.88971	3.30476	2.95422	2.65005	0.732007	1.66472	1.2011
EVM0007230	63.1898	66.7048	64.4648	67.8368	65.1971	69.2102	85.5921	77.0808	77.6341	49.1537	47.8706	50.6886	48.4523	54.0303	52.2899	68.1907	67.6751	73.534	60.7255	58.3933	59.8445
EVM0005267	420.147	469.69	464.45	797.602	791.706	728.81	156.11	144.183	141.065	2301.25	2360.89	2275.57	106.992	102.997	105.109	98.4643	101.023	99.1917	71.9506	71.2082	70.9005
EVM0017628	3.32254	3.97287	2.10495	10.7942	9.64332	11.6285	15.5029	17.0018	17.0641	3.81282	2.70847	3.47243	13.9538	13.7338	13.7532	15.964	16.8477	15.3582	18.2662	17.9108	17.6837
EVM0014742	0.80586	0.617355	1.0107	4.76944	5.58542	4.29863	6.34327	5.39147	6.25926	45.9893	49.5934	40.0781	5.20014	6.20052	5.28944	5.39215	5.77208	4.64183	4.6561	5.03297	4.64153
EVM0005396	0	0	0	0	0	0	0.861305	2.45649	0.873023	0	0	0	0	0.299835	0	0	0.311436	0	1.17858	0	1.1196
EVM0023078	3.15719	2.45871	2.11823	1.12243	1.57036	2.39826	2.43745	2.85201	3.83896	7.56718	6.51564	6.47737	10.9192	9.45121	11.6716	11.8352	12.366	10.5576	6.97852	7.25751	7.1655
EVM0019627	112.134	129.087	116.5	68.5034	73.4206	65.9637	61.783	61.0763	62.2834	70.6568	70.6768	67.4172	74.2552	77.1817	68.35	89.0409	83.6957	95.6528	50.3697	47.9038	48.7218
EVM0010592	24.8154	25.4097	21.9869	28.4418	29.3674	30.3421	45.8922	41.3759	45.3286	24.832	25.0663	27.5167	39.862	37.3194	34.4531	41.9273	38.3113	45.535	38.4553	37.4115	37.4112
EVM0017796	0	0	0.119379	0	0	0	0	0	0	0	0	0	0	0	0	0	0	0	0	0	0
EVM0008885	21.6325	22.57	23.0895	26.6365	25.044	23.8642	19.078	21.5818	17.801	24.0048	27.1243	25.2858	24.9124	25.021	22.8585	24.9014	24.9196	24.2327	22.7665	24.5822	24.8473
EVM0027224	1.95382	2.27972	1.15064	1.13533	0.287899	0.270573	0.824984	1.13288	1.20786	0.982961	1.50423	0.276167	1.41838	1.02112	1.16716	1.52266	1.06063	2.08125	1.88146	0.482737	1.3107
EVM0001254	1.41356	1.59312	0.69373	12.9199	12.9314	14.6817	15.3361	16.7077	15.1247	2.90929	0.880233	1.99803	9.91195	8.65746	7.38869	12.5184	16.1864	15.1831	4.76425	5.02052	5.38791
EVM0005914	27.3472	26.5514	24.3756	11.5484	11.2782	13.0105	25.4754	21.6258	21.5105	9.82575	7.81031	7.84698	20.682	17.769	21.1932	23.2498	16.651	21.2052	14.8675	15.3397	15.3255
EVM0013146	0	0	0	0	0	0	0	0.36165	0	0	0	0	0	0	0	0	0	0	0	0	0
EVM0025412	1.34723	1.11148	1.32236	0.0724867	0	0	0.210688	0	0	0	0	0.141058	0	0	0	0	0	0	0	0	0
EVM0016692	0	0.182995	0	0	0	0	0	0.307787	0	0	0	0	0	0	0	0	0	0	0	0	0.210421
EVM0012177	3.90009	3.90712	4.12582	4.19682	6.04486	4.56087	3.5782	4.25218	4.40996	2.37834	1.60926	2.1234	7.03531	6.17155	6.32787	5.95607	7.23368	7.87811	5.28575	4.17564	5.91978
EVM0010625	85.4383	94.1059	87.9383	179.942	174.411	182.941	67.4479	69.6806	71.5369	96.7529	93.8238	95.4991	61.7608	61.5652	54.2059	60.4149	51.781	62.8866	83.8008	84.0735	82.0075
EVM0026287	1284.8	1295.3	1353.46	484.736	456.244	497.41	379.692	347.332	341.716	709.164	750.307	713.495	382.693	404.505	379.386	342.481	353.231	358.091	254.508	267.141	259.068
EVM0004844	45.5462	47.9994	46.2767	22.8101	25.7858	24.5452	15.1812	12.5158	11.2603	23.7409	25.4544	22.2337	12.9021	15.6894	15.1575	14.2686	13.3802	13.8235	7.95234	10.2019	8.73637
EVM0018851	3.95471	4.93182	4.09151	10.9984	9.37101	9.52248	11.4081	13.539	13.139	9.01922	8.30152	8.41	9.94598	11.2769	10.2514	9.69279	8.44949	8.3494	9.02317	8.6817	7.10501
EVM0027884	3.01004	1.67429	1.72944	2.31079	2.88479	2.16894	19.3917	18.3372	19.2017	17.8296	16.2584	17.5027	49.4201	47.338	47.2187	44.5233	42.0956	46.1925	31.2951	27.4353	30.2216
EVM0017672	0.612664	1.58857	2.33859	5.40607	5.68413	5.59345	3.51311	3.64349	2.52501	2.24167	2.21969	0.833911	1.88688	2.13465	2.53029	6.17327	6.18979	5.02763	2.1851	2.85927	1.90969
EVM0015916	0.790997	0.287669	0.288374	6.04093	6.01646	4.11039	36.3256	29.9176	30.522	6.8013	6.32522	6.00554	19.3895	19.9022	18.2107	40.7333	38.6762	44.6492	22.8656	22.6983	22.3279
EVM0008428	0.968696	1.02752	2.06009	3.28355	4.33505	4.72007	4.64571	3.26445	2.76393	0.0984543	0.0487445	0	2.69926	2.53135	3.57205	3.43149	2.48322	2.3695	6.21882	7.57907	7.48299
EVM0009654	75.8207	86.9002	81.3581	15.5573	17.3582	16.822	30.9639	29.1913	30.2939	11.1253	11.6814	11.3312	32.0464	34.4211	34.3628	31.1508	28.5898	32.9191	27.4019	27.0453	24.0714
EVM0013549	0.56174	0.975034	0.300746	33.1364	26.7885	35.2658	8.00218	7.972	7.77107	1.40137	2.59025	2.64668	5.72937	7.13939	6.50798	10.4922	9.9106	9.57406	7.80261	9.27376	10.9002
EVM0027973	0.318321	0	0.156222	11.4836	11.6482	13.6656	1.19474	1.20682	2.04356	0.145588	0.648722	1.19984	8.92832	5.51082	7.5006	3.49561	3.02402	3.84294	3.6784	2.45777	2.71781
EVM0022482	0	0	0	0	0	0.135287	0	0	0	0	0	0	0	0	0	0	0	0	0.0940732	0	0.0893657
EVM0018373	4.32089	3.05553	2.04201	10.1259	11.057	11.869	0.6507	0.333099	0.253675	3.0741	2.27089	2.06096	0.42246	0.696985	0.566514	1.81408	1.30311	1.5153	1.02738	1.1862	0.845838
EVM0026321	74.7881	89.2663	75.7799	7.60885	6.08523	5.57953	7.23014	6.60405	8.62178	1.24383	1.50533	1.28135	9.9711	5.32999	10.4295	9.84784	8.61189	7.08143	11.6394	13.4387	14.0054
EVM0018805	74.911	76.6926	74.2713	95.8222	93.5982	96.2413	75.3843	80.3764	84.2951	66.1361	60.2273	69.876	63.3251	56.0868	51.9008	74.9578	72.8782	69.8747	59.5467	54.9017	62.2647
EVM0015209	1.22992	1.98107	1.52019	5.6469	4.83283	5.21487	1.23954	1.17841	0.996456	1.0417	0.990225	1.28774	0.78163	1.42843	0.665177	1.48455	0.618207	0.71168	1.4037	1.46313	0.888971
EVM0026651	34.356	38.8364	38.4967	114.682	123.765	118.956	152.901	161.557	156.317	94.508	85.2681	88.0483	190.92	183.421	167.182	153.647	157.029	154.009	82.1055	87.1151	77.3851
EVM0011660	5.94534	4.01824	6.55855	23.5412	22.8447	21.4699	596.664	619.994	624.298	39.8491	38.1717	38.126	377.505	398.645	403.56	505.233	573.085	546.554	498.006	483.969	491.117
EVM0000577	0	0	0	0	0	0	0	0.084432	0	0.0865785	0.171459	0	0	0	0	0	0	0	0.121526	0	0
EVM0009594	2.87587	2.5421	3.52845	1.50865	1.29484	1.27223	0.89949	0.962025	0.398881	0.876873	0.868276	0.903324	1.73979	0.704539	1.51117	1.35832	0.569177	0.510574	0.846195	1.03622	0.803851
EVM0018385	66.0108	75.0502	77.4568	41.7923	42.8946	41.6149	35.64	36.4742	36.1656	40.7625	43.807	45.374	64.4019	68.6636	69.0823	48.3715	48.9385	42.5387	39.5524	40.1668	41.3773
EVM0028006	32.6774	36.3332	34.929	19.6457	19.4211	17.3013	21.3936	22.8928	20.1862	22.962	23.3544	24.0972	37.9924	39.6473	35.2945	46.4527	42.6617	48.004	23.0692	24.9099	25.5735
EVM0022254	121.864	133.766	117.5	219.167	202.493	201.817	25.4173	28.0651	25.8873	201.629	196.282	198.239	34.2034	27.632	33.4466	24.1395	25.6007	25.958	45.9266	41.7695	45.6187
EVM0010461	21.1863	20.8545	25.2879	0.295533	0.899299	0.684192	5.15394	5.40531	6.05327	6.34024	6.08066	4.84727	2.01388	2.22136	2.14118	2.47078	3.01725	2.72428	1.84707	2.15415	2.28635
EVM0008994	0	0.286692	0	9.42327	7.96522	10.2307	19.7813	11.8139	19.0222	14.8338	17.8708	13.4984	8.9186	4.59081	4.30551	9.95726	14.6721	13.8195	18.7394	11.0185	14.8347
EVM0009680	2.31415	4.27049	3.45381	0.828936	1.08994	1.08288	0.267708	0.226228	0.0603	13.6288	16.3952	15.3543	0	0.165678	0.0420825	0.0449185	0.172088	0.0450245	0.0407024	0.19581	0
EVM0001895	13.2097	12.744	13.5674	10.6561	10.1163	10.3563	13.4302	13.5607	12.0971	12.1112	12.4922	12.5055	15.8579	14.4964	13.3451	14.6787	14.5997	15.1051	11.963	12.5326	13.4204
EVM0014133	655.067	721.281	697.059	1595.31	1724.61	1618	734.038	809.045	807.337	1300.13	1304.67	1328.75	586.101	594.318	607.612	580.566	609.003	551.803	442.615	464.828	455.896
EVM0008699	23.7565	25.7807	25.3507	66.191	77.3716	63.155	7.03027	5.75984	8.05287	43.6284	38.4557	40.6968	5.14569	4.93451	4.85178	5.524	4.62943	4.67188	6.3351	6.09536	8.09841
EVM0024791	16.1585	16.3418	16.3096	13.8751	14.8129	14.3141	97.7538	99.9069	102.257	34.7972	34.7523	34.4907	51.2473	55.6016	51.3245	84.3533	77.8177	81.5792	43.8456	49.0154	45.6012
EVM0006869	7.98258	7.83547	8.47837	101.194	85.8488	92.012	40.4135	39.749	39.2069	117.919	122.159	129.56	54.1756	55.4183	55.3565	35.2834	35.0064	41.2047	29.6006	26.6406	29.4999
EVM0013836	38.1166	31.3958	32.1342	39.9564	36.634	36.2414	3.16769	2.97646	2.83744	6.35562	4.55109	5.80753	3.78237	5.43671	3.43931	4.83916	5.91343	5.35237	5.5946	6.15879	6.22435
EVM0012269	16.1313	16.1875	17.1906	8.23296	8.19998	9.03032	9.8506	10.7353	10.2769	7.63549	7.56063	6.94894	11.0178	13.449	11.8968	11.6101	10.0774	10.1828	6.64097	9.04674	8.24497
EVM0003092	0.285617	0.100987	0.0934476	2.07459	2.71223	3.07638	0.0446665	0	0	0.304804	0.60363	0.762567	0.125663	0	0.126385	0.134902	0.581429	0.473271	0	0	0.174184
EVM0006091	5.06593	3.87715	3.33591	6.70725	7.62225	6.2163	0.661872	0.286015	0.182967	0	0.232329	0.120853	0.507843	0.502711	1.02152	0.726906	0.435135	0.364311	0.247004	0.316876	0.547502
EVM0002328	42.183	47.5586	39.413	40.0976	38.8326	38.6085	41.4844	40.6914	42.0489	27.8807	29.0207	27.8395	41.8786	40.3681	38.8739	41.0514	38.1182	35.6816	42.3406	36.6901	36.9229
EVM0022198	7.95545	6.70525	7.89296	1.58258	0.591407	1.58804	1.89644	1.68784	1.71775	0.983382	1.40219	0.688871	8.17337	9.21449	7.4211	6.9463	6.76975	5.98547	2.15332	3.02806	2.51762
EVM0010228	6.69918	4.82776	6.17393	30.3103	33.0554	27.7612	32.2935	35.3084	32.8788	11.8816	10.5608	11.1798	42.3218	41.6269	41.0713	64.2008	59.0611	65.8776	46.8813	48.5818	42.6017
EVM0006157	21.9535	25.0836	23.4768	5.31535	4.19339	4.1287	1.39872	0.906644	0.579989	1.92137	1.28881	0.638492	0.357738	0.885307	1.16932	1.34413	1.28739	0.866126	0.521988	0	0.165289
EVM0007532	5.07885	5.24552	4.52592	23.6229	24.8804	21.4705	2.19467	2.20567	3.11434	3.42318	2.23957	2.77077	1.85232	2.61944	2.1291	2.74603	2.26732	1.89829	2.31668	1.65112	1.87471
EVM0019903	15.1009	23.4172	20.6907	68.967	74.0213	69.0005	8.12766	6.70117	8.67567	20.3341	19.9959	17.1914	3.84474	2.0031	3.45978	1.62924	3.22494	2.39519	2.65737	1.89393	1.49594
EVM0012046	3.12882	4.78302	2.52909	0.0891229	0	0.0849594	0.172695	0.410448	0.437613	0.757589	0.250054	0.433579	1.94342	2.52497	2.93187	1.69512	1.74844	1.17632	2.24494	1.81894	2.80606
EVM0013346	15.213	16.71	17.4138	17.2448	16.7064	15.8806	19.141	18.9103	19.4631	14.0936	13.8967	13.0526	15.5733	15.9242	13.7695	16.504	16.335	17.4637	14.289	12.9474	15.0236
EVM0019563	36.6542	41.7785	42.1916	13.0054	13.2899	14.3052	64.6592	60.6978	60.0879	14.3562	13.4911	12.7797	33.9982	35.9621	35.0339	57.3671	48.3426	58.449	6.16089	5.72192	6.46224
EVM0008673	5.30531	7.06309	6.96084	9.90911	9.6788	8.9214	17.093	16.5157	17.2741	8.74015	9.24286	7.98354	11.9329	10.044	10.636	14.191	12.6735	15.1471	12.4419	13.1415	12.7438
EVM0014039	0	0	0	0	0	0	0	0	0	0	0	0	0	0	0	0	0	0	0	0	0
EVM0003771	343.469	355.129	344.601	246.316	255.912	252.931	482.452	466.472	455.782	379.074	369.456	358.857	531.691	602.154	597.024	644.931	637.796	651.44	363.381	421.855	381.884
EVM0011416	150.996	172.983	168.949	69.8247	73.9137	74.6805	35.5576	33.6248	32.7728	69.9792	73.2669	71.2461	32.3563	32.6264	26.5967	34.0616	32.6484	37.0759	24.9029	22.6281	23.077
EVM0000634	0.415103	0.264187	0.651901	0.0804033	0	0	0	0	0.0789594	0	0	0	0	0.216945	0.220419	0	0	0	0.106595	0	0
EVM0008792	7.20742	6.98353	8.29873	6.77884	6.67172	6.20623	2.79617	2.96739	2.43874	7.2901	7.97188	7.24879	6.31162	4.88962	3.77192	4.8117	3.85613	3.74033	3.02535	3.767	4.22641
EVM0018743	247.642	261.356	257.262	336.096	337.559	329.191	43.2082	46.1707	49.6762	401.13	419.138	414.663	71.3488	75.0862	68.933	50.0735	51.9943	46.161	23.4676	24.2072	24.1064
EVM0001141	117.614	126.417	123.988	157.012	156.763	144.529	82.1501	90.0829	89.2222	197.721	192.681	206.327	72.7356	80.3084	76.3997	73.6014	76.6008	73.5436	49.0255	50.715	44.6632
EVM0027050	12.9871	11.9172	10.5721	7.08741	5.06264	3.90153	1.0155	1.65501	0.931287	0.141424	0.046679	0.0485632	1.97267	2.22208	2.25766	0.146049	0.209824	0.21959	0.0661701	0.063666	0.0628589
EVM0016674	0	0.575944	0	16.5117	17.175	12.5321	7.23457	5.03727	5.47393	11.324	8.45891	10.4376	10.3201	8.65506	8.64946	5.38554	10.1689	5.86096	6.41378	5.7686	4.7683
EVM0021493	36.5653	40.4364	45.0536	27.6268	29.0926	31.2204	21.8026	23.4109	25.5029	33.1625	30.1127	33.5764	4.51825	3.0495	2.89176	2.93965	3.0971	3.31492	2.19758	2.05034	1.77131
EVM0017253	2.52334	2.06989	2.08047	0.488759	0.760166	0.341679	0.315693	0.0900374	0.0959963	0.276979	0.152369	0.348742	0.133224	0.131878	0.178652	0.286037	0.13698	0.143356	0.302387	0.207817	0.205183
EVM0020623	0	0	0	0	0	0	0.239978	0.760479	0.405405	0.779813	0.772167	1.28534	1.12524	0.222775	0.565853	0.362391	1.38837	0.363247	0.109459	0.526583	0.415926
EVM0004788	36.9272	37.9884	32.9659	90.4293	85.9092	86.5294	18.3697	18.6664	17.4489	45.1447	44.3305	47.1141	23.5193	23.2051	23.1097	22.6738	22.6711	27.5558	22.7281	22.4473	23.7355
EVM0027238	4.79856	4.34606	4.5288	7.22117	5.43907	6.23633	7.72364	8.26472	8.03937	2.76867	3.20959	3.20002	8.62357	8.29528	8.03608	9.30987	8.56615	7.44451	6.20855	5.88239	5.62773
EVM0020156	47.7094	48.6698	49.3051	23.1509	21.8844	24.4602	76.3865	77.0325	78.5941	37.7188	37.0483	36.0722	24.5403	23.8152	21.0672	26.9561	26.8093	26.1238	32.4401	33.7964	30.5738
EVM0012401	4.40741	3.87034	5.63801	8.22203	9.36899	10.4728	20.4065	21.6883	22.677	8.8562	8.67121	7.42123	25.5584	25.3001	23.643	26.1065	28.1421	26.2195	19.5743	18.8782	17.7576
EVM0015538	25.125	22.1958	23.5569	10.6774	10.5357	10.2479	0.633364	1.07045	0.641982	7.47787	8.55939	9.6823	0.0989937	0.0979934	0	0.106272	0.20357	0.319568	0	0.185305	0.182956
EVM0016333	8.3577	8.70109	9.79847	5.92077	4.63723	4.21527	0.871352	1.17354	0.515204	11.2551	14.369	14.5115	1.02143	1.41555	1.54094	1.20618	1.47032	1.53876	0.695523	0.764802	0.188777
EVM0006476	16.9627	20.242	20.7252	7.35836	8.15808	8.07495	0.497388	0.70929	1.34441	0.404068	0	0	1.86578	1.50063	1.05553	2.87924	1.19899	2.00768	3.6299	3.05597	3.12498
EVM0022700	0	0	0	0	0	0.0321742	0	0	0	0	0	0	0	0	0	0	0	0	0	0	0
EVM0007430	5.17626	6.28011	6.40896	10.6159	10.4357	9.12047	21.777	22.1517	22.0411	4.20875	3.64655	3.60246	17.4155	15.5155	15.3597	16.5866	17.3555	18.3075	27.54	29.8414	28.9266
EVM0007446	1.11732	1.99999	1.64504	1.62315	2.744	2.44992	1.17945	0.934407	0.531333	0.447143	0.664138	0.75675	1.47477	1.18614	1.48324	1.33582	1.84805	1.53734	2.28638	2.07046	2.34232
EVM0002769	8.19343	7.10714	8.2864	24.7138	23.0933	25.362	16.2023	17.1452	16.1133	3.15198	3.74529	4.14902	20.0121	20.9855	19.3392	22.6769	22.9925	22.8936	26.9145	25.3757	27.8559
EVM0013898	6.06639	7.26281	7.55242	17.6038	15.4022	17.1521	15.2559	17.3088	16.0786	2.44812	3.35336	3.53075	18.5753	17.018	16.4911	18.8981	17.5251	20.0831	25.3428	25.045	25.8156
EVM0008338	32.8016	40.6189	37.2025	37.1943	33.905	32.1911	30.6734	30.6388	31.0908	20.4513	21.566	19.4017	19.6082	19.3371	17.5213	24.347	21.5759	25.7794	27.4159	27.3903	27.6107
EVM0002308	0	0	0	0	0	0	0	0	0	0	0	0	0	0	0	0	0	0	0	0	0
EVM0025842	0.556213	0.70799	1.03729	24.5637	20.3805	25.1621	3.70551	3.37393	3.43853	0.457902	0.453413	0.838604	4.77199	5.30516	4.7994	6.62027	7.24659	6.6359	8.42701	7.48969	6.78416
EVM0010468	809.21	813.154	801.239	259.372	254.595	265.643	92.3767	91.2185	100.388	40.2018	43.4901	38.9898	74.5162	80.0839	79.2481	71.8274	69.7727	67.0997	91.8468	84.1113	80.4087
EVM0008354	64.9772	59.2474	60.51	64.5198	58.4792	62.6631	15.942	18.2411	19.8595	73.5537	70.4831	75.9354	58.3175	62.36	62.0957	73.9988	76.2724	69.814	55.6742	54.4218	54.7337
EVM0003639	100.438	102.63	103.324	63.3811	67.1839	64.0854	65.0558	61.4461	67.459	73.678	72.1772	75.9391	58.8837	65.6149	64.1661	66.5765	67.265	64.2922	53.2858	54.5053	53.4149
EVM0022894	0.559196	0.395437	0.0914784	2.43705	2.83818	1.80693	10.5815	8.81263	8.86403	0.937767	1.35065	0.526939	13.0396	15.3433	11.5061	11.225	13.7867	11.3839	1.3163	2.53298	2.8419
EVM0013326	35.5821	37.992	35.715	18.8703	19.9643	19.1344	33.639	31.8904	29.7907	36.7811	36.3901	34.7936	28.4182	25.1076	25.2424	26.801	23.1662	27.2453	21.3143	18.6019	17.3844
EVM0024073	7.06211	7.40488	10.3976	12.8928	14.6324	15.0633	27.8008	35.1191	37.1732	20.5305	16.1016	21.6852	52.6604	57.3252	56.5188	72.3471	90.3338	71.1921	40.6993	44.524	38.2171
EVM0021432	19.1045	22.7192	22.4356	20.4153	20.5414	19.4355	26.0285	24.5687	26.3826	28.2392	26.1732	30.2611	33.4106	34.1791	30.643	32.2283	31.4421	35.7913	30.4714	28.8651	28.0517
EVM0018088	49.4368	48.7694	52.2688	40.2065	34.5889	33.7013	60.9801	59.4439	56.4284	47.5575	44.2798	45.4578	38.7503	38.6122	38.6294	51.2659	47.3902	52.6728	37.9852	34.95	36.1238
EVM0027649	2.55645	1.72563	2.2051	5.70198	4.41385	4.86343	2.39876	2.21136	2.65243	0	0.210502	0	5.11257	3.54264	5.65612	4.72006	5.7824	5.06129	2.88451	2.00974	2.55119
EVM0025416	0.676659	0.772964	1.78813	4.99057	4.70414	4.46909	0	0.0928631	0	1.1903	0.942903	0.833819	0	0.0680082	0	0.368767	0.635756	0.443565	0	0.128604	0
EVM0018312	0.0511747	0.43426	0.502297	14.4224	13.6738	14.41	5.13793	5.38671	5.54853	8.51954	10.4291	8.72831	14.3873	15.7798	12.2961	11.892	11.1816	12.9376	8.08185	9.48293	7.55259
EVM0025464	19.4169	19.8237	19.8921	28.1288	33.181	27.4122	40.4617	38.2499	42.4358	31.3039	33.122	30.6472	40.1515	43.0227	39.0933	38.174	40.8993	43.2626	33.2406	33.7317	33.2547
EVM0008722	5.40274	5.40799	5.00422	9.212	11.138	10.538	6.0691	7.26317	6.94777	36.1254	33.2211	32.626	6.22721	7.45679	6.76805	7.22415	7.33223	7.78159	5.95987	5.2643	5.01193
EVM0017778	17.0438	20.0958	19.5741	22.1209	20.0459	22.4148	22.1718	22.0713	21.7457	38.4561	39.2973	40.5339	16.8033	15.8761	15.176	16.3959	15.4519	15.4136	11.1055	10.5993	11.3134
EVM0021031	2.38538	2.81139	3.29522	10.4386	9.72026	11.7454	11.8544	15.3679	13.024	1.2122	0.560148	1.24877	16.3256	13.7365	15.1292	16.6495	15.8267	19.4494	23.2541	26.194	23.7068
EVM0001912	0.458642	0.432441	0.900347	3.60282	5.00607	6.02215	2.67774	2.63661	1.98716	4.98775	4.06186	3.16936	6.05368	6.52518	6.42669	6.0655	6.29353	5.86268	2.81352	3.02182	2.17548
EVM0015888	33.4293	35.4595	35.1913	14.2495	12.5985	13.2976	15.0224	16.0417	15.6557	20.5748	22.4665	20.133	13.319	16.057	12.3852	16.0156	17.0608	14.8924	13.499	14.9381	12.7891
EVM0022696	0.987633	0.523806	0.538553	3.56029	2.9106	2.33019	9.16415	6.95021	6.52306	8.5824	8.44855	8.42766	2.82445	3.79956	3.20485	3.57632	2.82962	4.51992	3.87468	3.79584	3.88156
EVM0007935	48.2055	48.419	48.2237	40.939	41.1511	38.9511	35.7054	37.3197	34.2238	28.6827	26.2073	28.0089	31.0052	30.0873	31.2555	37.4887	36.0167	41.907	25.3027	25.2867	26.4601
EVM0017816	0.0927257	0.0491784	0.13652	3.8615	6.64949	4.66559	1.4791	1.44752	1.32285	116.413	118.883	118.658	0.36717	0.666342	0.430824	0.591246	0.692124	0.987736	0.297639	0.400926	0.169647
EVM0027518	4.75925	4.48735	3.97931	18.7213	19.7399	17.901	8.98649	6.8137	8.77346	9.99667	11.5484	10.409	16.3637	13.972	18.2516	12.9045	15.9479	15.355	13.5793	12.1943	13.8314
EVM0015862	22.8484	20.0318	22.9986	56.6186	57.0862	54.0274	14.712	16.4822	18.8481	44.0926	44.2938	40.6442	10.9246	12.4896	10.5231	8.75451	8.30579	7.45062	5.83735	7.20057	6.68272
EVM0010301	14.6646	20.1736	15.6996	11.3325	10.0543	10.4262	14.7104	16.0214	14.8387	11.9758	13.0908	13.1063	16.8018	16.6517	14.3294	20.3077	19.4914	20.2483	14.4418	15.3707	15.5815
EVM0016657	0	0	0	0.398166	0.161548	0.075913	0.385767	0.770162	0.312813	1.72991	1.75019	2.20825	0.325592	0.644603	0.272884	0.990332	0.725339	0.525531	0.316722	0.507893	0.351018
EVM0019359	1.48496	2.2502	2.77626	3.2187	3.12588	3.65589	2.45497	2.90161	3.22816	1.74642	1.28096	1.06613	5.50671	5.63585	4.13029	3.50686	4.70232	4.3186	5.3567	4.97927	6.98611
EVM0026994	40.62	47.7691	45.401	9.91444	10.4716	9.92817	66.8434	77.8735	76.462	9.1494	12.4199	8.58463	105.68	109.275	106.661	81.5774	77.241	79.4356	31.4735	32.951	35.1107
EVM0020537	0	0	0	0	0	0	0.12541	0	0.254232	0	0	0	0	0	0	0	0	0	0	0	0
EVM0008066	0.706625	1.29466	0.567472	2.79961	2.83971	3.49912	7.89618	5.73037	7.20936	2.2329	1.33824	1.21066	30.8634	30.6354	33.94	9.92153	10.5488	9.58	80.9126	78.4854	79.6059
EVM0023791	5.23197	5.60752	5.24235	18.5791	15.5259	17.1074	27.3077	29.1697	29.3897	87.1415	89.3477	83.7615	19.854	18.9413	21.4874	27.646	31.8042	29.8013	10.9161	9.4258	9.17336
EVM0016820	0	0	0.0755565	0	0	0	0	0	0	0	0	0	0	0.100578	0	0	0	0	0	0	0
EVM0015287	29.368	28.0836	23.4755	59.3623	56.2786	49.708	7.30665	10.221	8.78147	0	0	0.628953	6.60737	7.55804	7.97438	10.088	10.8699	8.37387	7.42719	7.28355	6.91984
EVM0016452	0.738721	0.671643	0.103583	11.7024	9.27835	8.37897	14.1601	12.7558	11.5927	31.3247	34.4586	32.6674	6.33781	6.54954	6.44425	6.80377	6.3733	6.44511	18.2922	15.5793	18.0205
EVM0014582	0.0686501	0.0728192	0	1.79512	1.14645	2.15492	8.05194	8.02231	10.1203	0.941938	0.497441	0.25876	0.0906123	0	0.182265	0.0972741	0.186334	0.0975037	0.264432	0	0.167466
EVM0023289	0	0	0.48397	0	0.484371	0.910443	0.15422	0.733075	0.312637	0.451027	0.297737	0.154877	1.30163	1.28848	0.872738	0.931553	1.56139	1.63407	2.11029	1.62434	0.801876
EVM0020938	0	0	0	0	0	0	0	0	0	0	0	0	0	0	0	0	0	0	0	0	0
EVM0018226	53.6117	53.095	53.656	51.947	53.3641	54.1171	88.8428	89.0678	86.8193	52.6304	54.3813	54.4911	125.008	127.91	119.746	122.291	129.642	128.08	51.787	52.3332	49.6775
EVM0024586	107.483	107.573	115.947	20.271	19.3994	21.6505	11.8225	13.0286	11.0051	19.9456	18.0732	19.5296	14.051	12.834	15.7019	13.4809	15.4243	12.9284	10.6309	9.27559	8.34256
EVM0013492	0.843643	0.596585	1.10409	2.31496	1.51938	1.81738	0.791604	1.00342	0.133729	0.257233	0.636778	0.397489	0	0	0	1.1954	0.190822	0.199704	0.722134	0.347403	0
EVM0006170	6.6865	9.17143	6.78934	7.70385	7.47447	7.76969	34.8318	35.0681	39.0337	13.6035	14.3055	13.4707	4.26064	2.86193	4.43814	15.1918	12.0471	16.2101	5.47675	9.1148	6.89005
EVM0000387	0.785382	1.18019	0.89936	0.950778	1.80021	0.906361	7.36937	10.7425	10.4575	0.778274	0.652083	0.185019	8.72503	7.86724	12.0767	9.55197	12.3463	7.43652	2.77309	2.18303	2.95364
EVM0005048	0.454673	0.482286	1.33883	0	0	0	0	0	0	0.311925	0	0.74978	0	0	0	0.161063	0.154263	0	0	0	0
EVM0025749	19.5073	16.5536	21.671	2.6621	3.83259	3.60195	0.499201	0.949167	0.337329	13.3017	11.0029	12.1154	1.17036	0.579268	1.05938	0.753845	0.240672	0.377812	0.683088	1.86217	1.08151
EVM0027150	0	0	0	0	0.296227	0.2784	0	0.179331	0.191199	2.11473	1.36565	1.32606	1.59208	0.787996	1.60122	7.40623	9.54899	9.70793	1.67777	1.4901	3.06502
EVM0009824	10.6599	13.5012	13.4822	14.741	16.8798	19.8789	3.8815	4.7782	3.783	46.3771	43.8088	44.5277	12.8801	11.0869	12.5317	11.9484	11.8038	12.3532	5.44749	5.76548	6.72736
EVM0005495	1.25328	0.120854	0.111831	0.110343	0.111923	0	0.213813	0.508174	0.216722	0	0	0.0536812	0.0751919	0.297728	0.0756237	0.08072	0	0.242732	0.146287	0	0.20845
EVM0012197	0.417001	0	0	0.807708	0.955826	1.79661	3.26065	2.60388	6.08123	0.890027	0.7554	1.30982	7.70567	8.35426	8.85705	8.46914	6.79109	5.72523	7.85269	5.83836	7.96835
EVM0010381	1.0688	1.07072	1.63187	2.53025	2.79982	2.19277	4.34577	4.3963	4.29195	0.814711	0.69916	0.111905	2.66469	3.64633	3.31058	3.28128	2.33691	2.78302	2.28715	0.806885	2.10027
EVM0022005	39.3411	44.2112	38.385	31.6223	36.6247	36.4504	9.61266	8.63788	7.65239	21.3949	20.8885	18.2052	9.81732	12.8964	12.2955	13.2567	13.0144	13.9524	8.88919	10.0553	10.2131
EVM0000334	20.3107	23.2485	22.8143	13.1136	13.1789	12.1985	20.8144	19.8158	18.9166	15.1683	14.9772	15.6259	19.6842	20.7898	19.0724	24.0491	25.0026	25.5682	16.6243	16.7275	17.5238
EVM0014633	28.0397	28.9375	30.3447	4.21649	4.82621	5.01516	28.4464	28.5401	31.6066	0.365364	0.578851	0.26347	11.5986	10.7507	10.7638	14.6586	14.2023	14.8066	9.02608	10.3128	10.1821
EVM0000371	0	0	0.0680224	3.69145	5.31014	4.2228	0.130055	0.0618205	0.263648	0	0	0	0.0914728	0.452742	0.275994	0.687385	0.752416	0.689008	0.444905	0.428068	0.591697
EVM0010745	31.5273	31.8078	32.5312	20.3435	20.0074	19.2196	28.3133	28.6601	30.1281	21.483	24.3016	22.131	18.4507	19.3445	16.8607	19.541	19.583	21.5619	19.1061	17.1761	16.1791
EVM0011227	0	0	0	0.248562	0.672328	1.10577	0.240822	0.610523	0.162732	0.391278	1.16232	0.483697	0	0.111779	0.113569	0.242444	0.116104	0.364524	0.54922	0.211374	0
EVM0003932	0	0	0	0.701733	1.2202	0.955643	0	0.369345	0.196895	1.1362	0.375021	0.487699	0	0	0	0	0.280955	0	0.265807	0.255748	0
EVM0023358	1.81983	1.83383	2.85796	9.69351	9.20668	7.56054	4.35431	2.84089	2.59621	1.08201	0.659327	0	1.32111	1.06998	1.93265	2.19182	1.60533	1.42158	3.6217	3.25983	4.55029
EVM0021665	41.0022	46.083	45.4755	3.87061	5.01663	4.03144	13.6809	15.581	16.1899	0.676998	0.402216	0.278968	9.57347	9.28333	7.17221	9.64809	9.14031	7.88386	5.03645	6.12588	5.41632
EVM0025974	14.6241	16.8242	16.8297	15.9247	15.3666	15.2479	25.9194	26.3503	28.2788	19.2558	18.2762	19.1739	26.409	24.9697	24.2426	28.9692	25.475	30.622	22.202	22.4104	22.9546
EVM0005564	0.515361	0.109332	0.607013	0.399291	0.405011	0	0.967143	1.10334	0.490151	0.282847	0	0.194253	1.49651	1.34672	1.64193	1.60653	1.25894	1.90311	0.794042	1.27332	0.880025
EVM0012499	8.09526	6.65093	7.77242	8.55278	7.72102	7.96298	9.39131	11.0815	10.499	6.16628	5.7592	4.90984	8.2372	8.50012	7.15124	8.09199	8.26971	8.65462	9.86482	12.5826	11.4896
EVM0019866	7.58213	7.84462	7.19024	5.82929	5.2711	4.69542	8.51543	8.01226	8.72005	5.18566	5.72648	4.74852	15.9508	17.2833	15.7327	20.0326	17.762	18.4562	14.408	14.1221	14.3415
EVM0010986	89.0075	87.0827	82.2089	179.631	215.061	239.378	104.526	124.523	130.661	88.497	83.1226	92.7293	139.373	136.159	131.734	158.237	166.937	124.847	161.13	199.425	181.725
EVM0020698	22.2656	22.6285	21.7781	25.2516	20.9564	25.3993	22.4235	26.0319	23.7634	22.6416	23.7923	24.533	16.5664	14.5712	14.2887	16.4629	19.723	14.4045	15.6162	15.4092	13.792
EVM0009047	0	0.180436	0	0.164742	0	0.235569	0.319225	0.834577	0.323568	0	0	0.160293	1.01036	0.889021	0.903254	0.482062	0.346282	0.604	0.764427	0.525356	0.518696
EVM0027236	2.49427	5.1403	3.56739	30.9891	35.4234	29.9362	4.81456	6.10285	5.28674	16.2317	18.2026	14.1695	15.1442	17.0396	14.6635	7.67439	8.22082	9.51442	21.5027	17.0794	20.8613
EVM0017616	5.92712	5.12776	6.47784	30.0041	32.6638	32.8714	259.38	243.701	258.431	149.269	142.856	149.89	102.313	102.048	106.695	148.73	149.411	160.485	61.2592	59.9796	57.5785
EVM0004778	0	0.213242	0	0.194696	0.197485	0.2784	0.0943164	1.07598	0.860397	0.827504	0.54626	1.51549	1.32673	2.36399	0.667176	2.27884	2.04621	1.14211	0.903414	1.11758	0.613004
EVM0005147	0	0	0	0	0	0.286693	0.0971258	0.0923362	0.492237	0.0946837	0	0	0.409876	0.270489	0.41223	0.73335	0	0.882097	0	0.255748	0.126253
EVM0020576	0	0	0	5.05293	6.06945	3.80279	58.6825	55.4213	66.9243	6.78195	7.46162	7.11591	29.1771	31.6629	24.3324	42.0224	39.5961	45.4367	52.9745	53.2595	55.4313
EVM0022175	0.598156	1.05747	0.587111	1.44825	0.783464	1.65671	0.935433	0.622513	0.853345	0.72953	0.361189	0	0.394758	0.651281	0.529366	0.7063	0	0.707967	1.53601	2.09367	1.58075
EVM0005116	0	0	0	2.87541	3.37712	4.40015	36.8028	38.6819	36.5604	1.64379	0.283073	0.809873	32.4851	30.9318	28.834	26.2381	24.9182	24.7464	29.2928	29.6321	31.4483
EVM0023921	0.451676	0.562429	0.404784	20.4074	18.7127	18.2211	39.6175	31.7427	31.3221	62.5665	61.6863	61.3635	25.2726	26.4541	25.8609	41.5446	41.7095	42.5352	20.7263	24.236	23.9287
EVM0012032	0	0	0	0.098159	0.19913	0.374293	22.3491	11.7536	16.291	0.185422	0	0	87.0901	81.4427	84.7647	22.2602	19.6698	22.1688	294.495	309.018	296.694
EVM0025552	0.15593	0.248099	0.229576	4.15288	5.97391	6.40617	7.90081	11.545	10.6036	2.42475	1.62419	2.20402	9.57034	9.16803	9.00431	6.07599	4.23234	7.41914	38.1394	33.7103	40.1298
EVM0016280	44.4333	53.3789	48.6753	30.2071	26.9083	28.8603	52.4834	51.3564	48.0601	37.2332	37.7204	35.2694	39.4207	41.3446	35.9461	52.6394	47.7684	51.4272	30.4716	27.6825	29.4144
EVM0015516	7.01213	7.13527	8.52328	8.8047	10.4527	11.5926	20.4656	22.1112	23.497	9.21103	9.3792	9.5273	11.4616	11.4524	11.5816	12.1888	11.9508	13.6651	12.9815	14.2529	14.5695
EVM0012408	40.0114	39.6497	38.7472	25.4445	27.6056	27.0562	170.598	178.38	170.332	21.217	19.1505	20.512	186.872	167.266	177.168	267.544	238.572	280.34	217.29	199.203	211.694
EVM0007640	44.0269	45.0408	43.4932	5.51068	4.61144	4.07126	4.27126	6.47164	5.68231	24.4627	23.0633	19.9058	9.20024	7.52744	8.59213	7.861	8.68743	7.37445	8.03638	10.8076	6.41969
EVM0005285	10.2253	11.0316	12.181	6.09409	7.3404	6.41454	2.99316	3.04046	3.44949	3.03782	3.08719	3.00592	9.86279	9.70604	8.9913	7.7397	6.52338	7.50971	4.93732	5.99208	5.16994
EVM0026712	0.260625	0.092151	0.0852709	0.336545	0.256025	0.320823	0.89668	0.387482	0.330502	0.158933	0.0786875	0.409319	1.14668	1.47562	2.99848	1.60027	1.65061	2.22099	1.67316	3.00504	2.43713
EVM0027094	0.0935578	0	0	0	0.0919063	0	0.0877868	0	0	0.256738	0.169481	0.617127	0	0	0.124197	0	0	0	0	0.577892	0
EVM0015407	23.5839	24.5108	22.4469	126.737	127.617	118.397	64.4502	71.6847	56.9441	222.41	217.352	239.894	76.302	76.5685	75.7915	34.0924	32.9763	31.9172	20.2891	17.3632	18.6927
EVM0012120	58.7629	57.325	62.568	47.9205	42.8112	44.7377	28.1227	29.8469	26.8344	27.4396	29.0943	30.9359	16.44	21.1046	19.6324	21.4756	20.7824	18.1372	34.0043	36.0863	30.2557
EVM0015522	0	0	0	1.00054	1.01487	1.21392	0.264377	0.25134	0.357299	7.56007	6.0398	5.39858	1.36362	0.981699	0.748061	0.798474	0.764762	0.400179	2.05	1.85639	2.17652
EVM0023286	0.141425	0	0	0	0.138928	0	0	0	0.403519	0.129364	0	0	0.373337	0	0	0.400784	0.383863	0.803461	0	0.349423	0.862482
EVM0015193	12.7569	14.1137	11.175	25.9715	27.2869	27.6077	93.3791	91.6498	94.0625	44.8568	39.5715	42.7846	265.607	289.627	305.827	176.97	178.154	170.569	95.1059	93.4555	88.088
EVM0015253	4.57777	4.62727	5.49761	23.6799	23.8604	24.5128	7.78225	5.81309	5.89049	0.246317	0.292683	0	9.59654	11.9624	13.5123	8.31797	7.96679	10.7089	5.80852	4.98991	5.2551
EVM0004337	21.9681	25.2162	25.5371	8.37202	7.70872	7.55474	62.6462	60.5489	59.3677	7.0245	6.76559	7.5132	118.393	127.697	117.625	199.015	185.317	203.21	113.471	117.73	106.667
EVM0014932	83.6347	88.7139	88.8729	56.9297	57.4713	60.6784	3.83802	4.45037	4.39125	29.5353	25.5409	28.1486	14.8469	15.7091	12.8754	16.0263	18.3775	17.8686	11.2198	10.4506	10.9607
EVM0018611	0	0	0	0	0	0	0	0	0	0	0	0	0.103238	0.102195	0.207661	0	0	0.111089	0.301276	0.096625	0.0954
EVM0021188	450.206	448.09	471.076	72.4637	65.2782	72.9694	12.1346	11.0727	12.135	102.399	102.493	106.249	29.0334	29.0418	30.8096	14.2342	21.7818	14.7598	16.2339	13.6938	15.5624
EVM0016568	6.33546	7.16822	6.90941	8.88544	9.15103	8.38369	15.7203	14.1497	14.1712	12.9211	13.5596	12.0948	11.4594	11.1596	10.9645	14.3633	13.725	15.5636	11.087	10.4355	10.2173
EVM0024955	18.6525	21.1253	21.3473	18.6882	18.5179	17.3349	18.9662	18.5613	19.4128	22.4319	22.7729	21.0312	22.8214	21.0049	22.6237	21.3052	23.0615	23.572	18.9875	19.5848	17.4028
EVM0016161	13.7562	13.0918	13.808	19.2179	19.7993	20.0459	12.7278	12.656	15.8641	15.6522	15.477	17.7955	16.8601	17.5978	15.5889	20.1371	21.4336	17.9041	18.5855	17.8822	19.497
EVM0025053	4.98911	5.84501	5.6827	6.58066	6.12631	6.82321	7.56355	8.17034	8.03827	6.50491	6.55917	6.29766	10.959	11.1644	9.56383	12.2922	11.5964	12.7972	8.70043	7.84222	8.94623
EVM0012756	46.663	50.1447	48.0794	79.074	75.6229	79.485	33.4001	31.2518	33.5757	82.9092	83.6896	85.8246	21.3473	19.5036	23.2536	26.9324	30.1387	27.9675	21.299	19.2556	21.0378
EVM0005284	0.0792346	0	0	3.52989	2.33508	2.41401	5.12995	4.02881	4.59688	5.29087	5.38253	6.27178	1.67333	3.00226	1.57775	2.69452	3.44102	2.36327	7.93524	9.00532	7.6348
EVM0025269	0.106223	0	0.0521307	0	0	0	0.149506	0.473778	0.202053	0.242911	0	0.100095	0	0.0693941	0	0.225769	0	0	0.136386	0.0656121	0.0647803
EVM0027097	7.87415	5.99007	8.08006	5.31503	5.00051	5.61746	14.7023	11.6004	12.6329	6.14773	7.34817	8.88144	12.9128	12.6264	11.8255	16.3979	13.9245	14.2902	9.34416	9.7766	9.07059
EVM0027789	73.4284	78.9866	84.9108	2.88467	4.19817	2.86947	36.8798	42.5701	44.1558	1.65843	1.40758	1.95253	30.5116	29.0188	29.8272	36.6083	42.5322	39.1778	19.205	15.3585	20.7712
EVM0024337	67.3304	67.6831	63.9152	34.2002	40.7232	40.6071	82.0752	71.7437	73.2278	90.6274	84.5443	88.2548	65.2073	67.2035	63.004	70.6412	73.5421	69.9742	30.092	31.9099	29.7979
EVM0021962	12.4971	12.0848	12.8082	3.40249	3.30332	3.28987	3.24944	2.19378	2.81631	13.0382	13.9105	14.0936	7.68447	6.2953	6.66258	4.12472	3.54189	3.20776	4.12421	3.53412	3.73418
EVM0003041	172.497	185.817	189.352	30.0877	28.0351	28.0455	18.3675	17.7693	16.5771	29.3288	29.874	34.076	13.854	14.3647	13.8827	16.8809	13.9847	17.356	14.7062	14.339	13.9703
EVM0013828	8.6351	7.36353	8.14327	6.66844	5.26702	6.51322	3.38926	4.078	3.16699	5.8337	4.85635	7.71153	8.86479	10.1026	9.88969	6.23773	5.97437	7.37469	6.66676	7.18141	6.05779
EVM0023442	1.13892	0.939621	1.2421	0.285966	0.207188	0.194719	0.435382	0.752567	0.641899	1.69774	1.45185	1.39121	1.89301	0.826713	0.671958	1.01609	0.973193	0.838757	3.19544	2.29286	2.31524
EVM0008527	1.8123	0.833021	1.008	0.292527	0.237374	0.390405	1.19035	1.50887	0.804367	0	0.109433	0	6.13966	4.57795	5.29278	2.31115	2.45952	1.8876	2.63716	2.01497	3.09466
EVM0024741	9.19543	12.5044	10.0309	10.7837	12.0299	11.0444	15.0483	15.3364	12.5589	6.35828	6.57225	7.16607	9.31859	10.2209	8.38861	10.8991	11.4148	11.9461	9.76418	10.6598	10.2324
EVM0022958	30.5913	33.4645	28.185	22.4705	23.2437	22.87	23.603	26.9815	24.3246	19.2971	19.1773	19.0134	24.2065	22.5112	22.5158	25.0097	24.0058	25.5038	18.5821	17.8789	16.8583
EVM0025777	0	0.0585086	0	0.0534199	0	0.0509243	0	0	0	0	0	0	0	0	0	0	0	0.078342	0.0708216	0	0
EVM0011604	5.51275	6.65158	7.64298	0	0	0	0	0	0	0	0	0	0	0	0	0	0	0	0	0.170257	0
EVM0000887	36.4548	36.304	36.3608	35.9405	34.3299	36.6828	35.4981	40.2982	36.667	165.411	174.597	164.284	49.0691	52.771	56.4881	55.3709	56.6814	58.2022	38.7247	37.5832	38.3863
EVM0001013	0.493631	1.04722	0.161505	0.318712	0	0	0	0	0	0.150512	0.149036	0	0.108592	0	0	0.116575	0	0.701103	0.211267	0	0
EVM0009398	0.640132	0.135802	0.376987	4.09168	4.5276	5.7917	27.1492	30.1502	33.2415	0.351326	0	0	65.3968	65.2378	58.4643	13.9684	23.1086	13.274	9.36969	9.96407	10.3062
EVM0009748	0.0425263	0	0.041741	0	0	0	0	0	0	0	0	0	0	0	0	0	0	0	0	0	0
EVM0023477	5.10141	5.47721	4.15232	2.34979	2.68902	1.49334	4.72836	4.88367	5.68023	3.12989	2.9865	2.52082	10.2644	11.0548	11.1492	16.3081	16.7172	13.1657	9.50548	11.6051	11.3821
EVM0017149	0.567164	0.668453	0.309273	0.122063	0	0.174541	0	0.11243	0	0	0.114158	0.178149	0	0.0823381	0	0	0.0855239	0	0	0.155701	0
EVM0009259	29.8201	29.7659	31.0674	41.2977	42.897	37.8803	55.8927	54.4436	59.9283	30.5612	29.6642	32.1044	44.1954	37.3349	42.7957	46.3027	42.0608	48.7013	40.8278	37.1104	38.0698
EVM0012940	12.5004	16.0548	13.4633	14.5275	12.8771	14.847	21.8735	25.2552	23.1351	11.6816	14.3211	10.6332	21.7614	23.3955	20.6306	21.8294	23.7505	20.6333	17.0043	17.6963	18.5434
EVM0024056	45.1009	48.5903	47.011	46.8308	42.5326	44.3818	44.5428	45.691	44.3077	44.9759	42.7087	42.1993	51.3587	55.8775	50.2918	58.3925	55.5431	62.3486	53.3659	51.7396	50.7386
EVM0007688	0.690158	0.34677	0.784374	0.31661	0.321146	0.570103	1.26109	0.71286	0.656397	0.166132	0.0658014	0.0342288	0.575336	0.711903	0.33754	0.566165	0.345076	0.619093	0.606302	0.448736	0.620266
EVM0016264	0.933945	1.08072	1.0417	0.945616	0.792351	1.05821	0.995836	1.24968	1.45352	0.698974	0.34606	0.0400032	0.616364	0.776536	0.450839	0.601526	0.460904	0.361768	0.381546	0.314663	0.466011
EVM0016610	5.23387	4.12414	4.40333	0	0	0	0	0	0	0	0	0	0	0	0	0	0	0	0	0	0
EVM0010082	20.7636	17.6411	18.6984	130.709	130.848	123.905	80.5323	78.8987	81.3404	107.273	104.441	98.8742	59.4023	58.9996	63.8913	62.6984	59.2989	57.979	61.343	65.6833	63.1294
EVM0011621	0.99602	0.140868	0.325876	39.0993	33.9844	37.0888	9.90657	12.2612	11.557	20.5905	19.3662	22.8384	110.344	109.576	98.3725	54.1945	50.3745	51.3988	49.6193	50.8587	52.7246
EVM0009029	23.2311	23.0846	21.785	45.1648	43.606	46.7224	35.4929	48.842	43.8609	21.724	20.0248	20.1007	69.6474	66.4612	68.0984	59.2269	69.7359	69.9153	66.3086	63.9059	56.9863
EVM0007949	9.02785	7.04908	10.0919	26.3511	20.6931	22.3418	14.0006	14.6524	14.5489	7.22573	6.47347	4.96246	21.846	20.1508	21.3056	22.0307	21.1006	22.4389	23.9877	23.2348	22.0226
EVM0007203	4.10131	5.6005	4.44202	13.6053	15.5136	15.0588	13.3143	13.9193	15.6028	9.18487	9.09481	8.97328	24.7647	27.9021	31.4152	15.5638	15.6744	17.2075	12.2871	14.0934	15.6972
EVM0010805	9.32243	7.91086	9.91635	54.5491	53.0305	50.2394	76.6515	82.9668	88.5403	23.3612	21.1685	24.8422	51.8519	51.4412	56.0062	75.939	76.852	73.8396	47.0433	53.1907	43.7372
EVM0005306	4.48801	5.23663	4.53729	7.73681	7.75947	7.2925	5.51664	6.08533	6.18928	5.00845	4.55284	4.73662	8.23407	8.44406	6.97064	8.20351	7.12626	8.66907	7.77926	8.48285	8.43005
EVM0008642	63.8666	69.7763	67.4999	71.1771	67.7668	63.573	101.989	98.6353	94.1346	59.8116	60.0518	62.2566	107.233	108.955	101.079	108.93	101.271	117.651	72.1223	74.6322	74.7337
EVM0023331	2.14885	1.09409	1.34987	2.58058	3.12417	2.53938	0.806522	1.07345	0.326998	3.45947	2.25775	3.9688	11.0049	10.2198	8.44367	13.519	12.4817	13.5509	22.7345	20.7061	17.8226
EVM0018039	0.279812	0.237444	0.274646	1.84274	3.07858	2.63498	6.5113	6.68942	6.70635	4.60712	4.61263	4.00781	6.42631	4.67963	4.82884	6.10581	5.84803	5.56384	15.8796	13.8269	16.4501
EVM0019525	0.166991	0	0	0.0539088	0	0.0513904	0.10446	0.198618	0.105882	0	0	0	0.367356	0.436373	0.443359	0.315492	0.604343	0.158118	0.929107	0.825182	1.22208
EVM0019524	18.0343	17.8599	17.5055	9.62162	10.0338	7.47768	75.1376	80.5082	82.9525	10.73	11.4559	11.6928	11.9019	10.7911	10.4872	25.2711	23.771	26.1808	25.9216	25.7293	22.5319
EVM0027805	25.6702	26.292	26.2275	8.23302	7.9991	9.21526	12.4579	12.7595	13.5813	4.15016	3.89318	4.09533	6.7765	6.83282	5.99122	7.1732	7.38886	9.56423	6.83718	6.13594	6.37853
EVM0019406	4.65966	4.85887	5.81393	3.6714	5.04291	4.01029	5.26151	5.84746	4.35661	11.3421	9.58557	14.5122	1.77214	1.0319	1.36295	0.223815	0	0.112171	0.608422	0	0.192658
EVM0006933	104.851	104.933	106.902	34.8976	37.3692	37.8117	33.9005	34.6161	34.8163	65.4843	68.9111	70.6569	42.6411	45.02	42.5687	28.7793	30.3531	33.9379	15.7082	14.7005	14.6307
EVM0017289	125.387	130.785	133.122	71.7269	64.2144	63.4369	32.1191	39.8561	36.6902	110.871	112.017	105.826	31.1691	36.7519	31.6255	35.8296	41.1235	41.9097	33.5935	35.0071	37.9279
EVM0016656	26.508	24.424	23.9269	19.4305	20.4236	21.8818	43.9909	43.1662	46.814	32.2349	37.9919	35.4603	74.7104	77.9622	84.6612	70.5552	73.29	77.5134	55.1904	65.366	61.1773
EVM0015341	3.6001	1.96097	2.7696	0.0942327	0	0	0	0	0.0925405	0	0	0	0	0	0	0	0.132049	0	0	0	0
EVM0016013	0	0	0	0.249293	0.379296	0	0	0	0	0	0	0	0	0	0	0	0	0	0	0	0
EVM0015564	0	0	0	1.38577	1.6399	2.05494	1.56639	2.411	3.0998	11.4162	11.5923	13.1089	3.14774	3.94685	3.58792	3.4918	5.28627	5.98394	3.98059	6.57965	4.46011
EVM0004745	0.342606	0.605687	0.224186	0.110602	0.224372	0.948913	0.535788	1.01873	0.651693	0	0.620634	0	0.602947	0.447641	0.909615	0.485457	0.774935	0.324402	0.293261	0.423245	0
EVM0014314	19.2788	20.384	20.0145	14.5418	13.9003	15.9162	28.7578	28.6074	27.8562	20.9695	21.8833	20.0299	18.0245	19.457	16.8155	22.1514	24.0673	18.4299	13.646	11.5265	13.2646
EVM0004121	7.03882	5.45613	6.20024	2.68015	2.09801	3.24922	7.11269	6.92293	5.72179	2.64146	2.83353	2.89121	5.5585	5.65954	5.79008	6.09503	6.40922	5.21223	5.25259	6.05714	5.72353
EVM0003939	20.8669	26.8235	25.5152	26.717	25.8837	25.6321	12.2235	15.4066	14.5202	14.1268	15.0027	15.164	11.0481	10.0893	8.99879	8.1018	8.15973	8.37209	8.40093	10.8502	10.0655
EVM0017322	17.0174	21.0701	19.7942	20.176	26.1167	22.5881	14.5471	17.6653	17.2793	18.1698	20.1858	20.8865	18.5448	15.1132	15.1139	14.9311	12.246	11.5258	17.8063	16.085	16.1766
EVM0010800	4.01238	3.77724	3.98751	5.19737	4.08936	5.13978	0.705915	0.536883	0.477013	0.0458777	0	0	3.64099	3.86633	3.329	0.426401	0.408399	0.783581	0.515172	1.23919	1.16231
EVM0005607	13.1393	14.2624	15.9423	18.1787	18.8531	17.86	23.5794	23.4076	26.0133	17.5202	17.2096	18.4819	21.3372	21.0215	21.1038	21.4947	19.9633	24.3746	19.1329	17.415	19.6706
EVM0016947	0.40407	0	0.0793218	2.97412	4.04876	4.02894	1.21327	1.44179	1.15291	41.988	42.8938	40.4369	2.66669	2.74533	2.89656	2.97725	3.29026	2.41038	2.59405	2.69555	1.77425
EVM0007987	32.2868	31.0069	28.2149	0.67245	1.36417	1.08976	0.065151	0	0.26415	2.85808	2.32693	2.22458	0.183294	0.272162	0.0921731	0	0.282693	0	0	0	0
EVM0006386	29.7908	30.1375	32.1406	29.3285	31.5868	27.731	2.95703	4.30466	4.40223	27.8359	30.3281	30.1603	10.074	9.52189	11.1124	7.11676	5.74707	4.68577	3.16116	3.10237	2.70268
EVM0027895	2.8004	3.84413	4.52725	9.285	9.25619	8.21249	4.01877	3.17403	5.54616	3.6465	3.19297	3.75649	7.3056	7.5331	5.94802	9.89675	10.7308	9.87332	6.13366	6.34924	6.34912
EVM0017822	0.960199	1.01851	1.21174	0.664234	0.875874	1.45637	0.064355	0	0.0652306	0.250947	0.559096	0.775551	0.0905271	0.179225	0.182094	0.0971827	0.0930796	0	0	0	0
EVM0020754	0.777082	1.12401	0.624054	12.5203	12.4914	10.957	0.53029	1.13431	0.73907	2.90788	1.40769	1.33138	4.38246	5.26119	5.72053	2.90287	2.97206	2.50838	2.449	2.44359	2.15412
EVM0028036	34.5245	41.6781	35.1715	15.2394	15.4271	12.9452	10.7886	11.3128	10.2241	47.7411	48.1479	51.0603	15.9986	14.9006	16.4214	15.6737	16.788	16.4188	11.082	12.7028	11.4396
EVM0018155	0	0	0	0.0501238	0.101684	0.238911	10.441	9.5568	10.5831	0	0	0	16.1218	16.0941	14.6342	17.0137	19.0347	18.23	23.8562	26.1502	27.5231
EVM0003995	4.09103	3.87034	6.62012	0	0	0	1.24498	1.77537	0.946437	0	0	0	2.04317	1.73359	1.90812	0.940021	0.750278	1.41336	0.709825	0.819555	0.809165
EVM0012868	7.87617	7.33149	5.57454	0.363232	0.947405	1.03879	44.7945	40.6259	42.0916	3.08765	2.71767	2.77688	38.2596	37.383	44.0983	38.8708	51.2635	46.8768	26.8295	24.8875	22.8729
EVM0009422	7.9642	8.40963	8.24159	4.88614	5.48715	5.58945	11.3277	10.2869	12.2016	6.26315	5.90798	6.65583	9.18021	10.0291	9.51996	11.6934	10.4661	11.3627	7.68083	6.72238	7.12066
EVM0012870	8.64474	5.7162	8.26472	3.58809	1.87489	5.07887	25.1773	27.4409	28.7231	1.84852	1.42364	1.37531	39.4174	43.8599	38.8986	31.657	31.5394	33.4858	3.60373	2.3578	3.56033
EVM0015125	0.0928436	0.131309	0	2.45772	2.43213	3.17149	4.47199	4.33428	4.26793	8.26615	8.49345	8.63215	7.67952	8.28933	7.27171	8.37568	8.14806	8.52731	5.68221	6.07889	5.36012
EVM0022741	0.207512	0.0733714	0.407361	4.89027	3.05774	3.44847	6.94473	10.1811	9.86806	2.97379	2.19281	1.75988	7.85175	5.96487	6.79495	4.50854	5.06918	6.09107	12.7002	10.3396	10.0398
EVM0026231	32.9992	35.4241	35.116	17.9648	17.2802	17.7056	41.6365	40.8811	41.8571	25.9205	25.6364	27.0762	44.298	44.9736	43.3233	42.1668	41.5532	41.7028	20.9725	23.9777	26.5371
EVM0015462	3.15337	2.65432	3.51448	5.22128	5.05626	4.73319	19.7384	19.8177	22.0967	3.51718	3.11416	4.00669	20.2738	21.8765	19.7421	20.0347	19.603	21.2956	15.5421	15.8587	16.7495
EVM0003157	14.4265	12.0634	12.8165	15.0426	12.1547	15.7495	11.2641	13.4797	11.3172	24.4179	24.7031	28.826	19.2503	22.289	23.4147	25.5149	24.652	21.836	11.56	13.7243	12.2017
EVM0001400	1.59799	1.31837	1.39421	0	1.22095	0.163924	0	0.475161	0	0.649654	0.804106	1.00388	0	0	0	0	0	0	0	0	0
EVM0024237	21.5697	23.6579	24.868	26.7161	26.6183	28.7644	29.1885	26.5711	24.5617	21.7884	20.6887	24.2892	28.4702	25.1789	27.1403	28.0683	28.4764	29.1766	21.0378	18.7915	20.5817
EVM0025997	12.7226	12.7597	13.7705	15.3438	16.2186	14.7501	12.5385	14.2519	14.4594	15.1753	15.7755	16.5882	13.6243	14.0094	13.8796	15.911	12.9588	14.3196	11.8149	11.4995	11.6791
EVM0026214	35.182	34.5197	37.7697	30.7188	31.9419	35.7038	94.7284	95.4266	98.6314	39.6489	36.4221	36.8304	31.8893	34.4759	31.2332	44.905	46.2544	41.2243	23.0096	23.2933	22.9644
EVM0019241	23.4458	24.4034	23.0848	0	0	0.0676434	0.274995	0.653585	0.34842	0	0	0	0.290123	0.574383	0.778104	0.41527	0.298303	0.520313	1.50517	0.995644	1.07239
EVM0023258	7.1365	5.67743	7.98709	20.9874	19.6209	20.6899	4.7364	5.0851	6.16661	5.73183	8.31638	6.15077	4.36517	4.54848	4.6213	5.24103	6.79143	5.68603	4.02277	3.44047	3.34378
EVM0027392	4.42758	3.62137	4.18875	0.206651	0	0	0.450485	0.0475856	0.304409	0	0.0483169	0	0.63369	0.418191	0.212443	0	0.217186	0.15153	0.616427	0.658999	0.650645
EVM0000686	19.8989	17.9153	20.0483	58.7618	62.5598	56.8849	98.4045	95.8671	100.208	100.231	99.487	101.305	60.7715	59.6168	55.9772	102.123	98.5773	108.348	89.0121	94.1475	83.6402
EVM0008277	0.352537	0.747892	0.576712	0.341423	0.57719	0.433963	5.18239	9.32953	6.70583	0	0	0	3.41233	2.45662	2.96394	2.66415	3.18959	3.50495	1.81057	2.61307	2.72328
EVM0020081	17.4105	18.6074	18.3373	21.6611	22.1006	24.0501	28.7639	32.0008	31.3659	25.1523	23.7538	24.7539	24.7748	23.4931	22.9959	26.2234	23.5093	25.351	19.6516	19.7205	20.4334
EVM0006922	120.978	132.916	119.997	62.344	61.8743	55.1279	8.85211	7.77204	7.2836	226.906	230.713	235.006	16.847	16.5317	16.3544	12.3454	11.9748	12.2957	3.13511	2.81079	3.04591
EVM0019710	11.0802	10.7199	12.0707	9.07998	8.65187	7.08201	4.76041	4.8153	6.06042	6.23712	5.95539	5.81333	5.14283	5.35601	5.44175	4.42824	4.13112	4.09282	6.25341	5.21452	4.9009
EVM0017484	28.4114	30.0685	27.3183	24.5865	25.0019	22.9923	25.8437	24.8563	26.838	27.2541	30.8921	27.773	29.9835	25.6446	25.7989	28.039	30.3049	28.6079	22.3914	23.2533	23.7434
EVM0001709	32.4855	32.7755	31.7087	19.4844	18.4884	18.7406	19.2159	22.7068	21.3291	23.6468	23.8069	22.4915	20.7014	20.3038	19.7194	27.843	29.9948	26.9358	18.332	19.3308	18.8219
EVM0005931	11.7997	10.9366	9.44539	12.3708	12.323	11.6871	8.06205	6.94913	8.66205	7.49257	7.62664	6.63906	13.6089	12.5733	12.3184	11.5252	10.5722	10.9829	10.4435	9.90671	10.6894
EVM0008193	33.1617	36.3345	36.3973	28.0395	29.5144	30.7642	31.0559	31.7316	30.1032	45.3243	45.0255	45.4501	34.1428	31.1527	34.1682	35.9245	38.8559	40.7557	36.9259	37.553	36.1755
EVM0023748	0	0.169876	0	3.10203	2.25497	1.82355	5.10923	4.80966	5.58492	7.42231	6.62426	7.04256	6.83476	6.55645	5.81102	6.20263	5.07138	6.14145	9.39025	6.52886	8.33434
EVM0002223	7.80459	7.41329	10.0192	6.66176	7.40693	6.147	10.571	8.37805	8.63897	6.0702	7.26873	7.18818	6.83849	6.827	6.02901	8.52835	7.68956	8.42323	6.19928	6.67281	6.83024
EVM0001299	1.07613	1.07014	0.924227	3.06148	3.69997	2.67007	0.757313	0.719967	0.639681	1.47654	0.670113	0.697162	0.3551	0.351512	0	0.0953017	0.365112	0.0955267	0.25907	0.332354	0.410176
EVM0011073	24.1904	25.1773	27.4614	27.9274	25.4501	23.9651	36.8668	39.8241	40.2983	25.7307	27.1709	27.1731	37.8618	32.0684	35.8668	35.6362	31.6643	39.8806	31.1891	31.6933	34.3713
EVM0027814	10.0655	8.19826	8.05663	0	0	0	0.168654	0.160338	0.170949	0	0	0	0.869893	1.72221	0.954423	0.933847	1.4636	0.76586	1.30776	1.48031	1.24231
EVM0003179	0.261247	0.092371	0.427372	0.168674	0	0.160794	0.326843	0.621451	0.662581	0	0.0788753	0	0.114941	0.11378	0	0.123392	0.118182	0.371049	0.11181	0.430315	0.21243
EVM0014969	0.18108	0	0.177736	0.526113	0.355766	0.668713	1.01946	1.61531	0.344443	1.65638	0.328027	0.170634	0.23901	0.709783	0.721146	0.256582	1.22874	0.514374	0.464997	0.6711	0.662592
EVM0004831	1.39923	1.25586	3.4863	0.208479	0	0	0	0	0.102368	0.68918	1.36485	1.52136	0	0	0	0	0.146072	0	0	0	0
EVM0004965	0.0996927	0.211494	0.0978519	0.28965	0.293799	0.276118	0.56126	0.0889304	0.284448	0.182382	0.180594	0.093942	0.131586	0.260512	0.264683	0.14126	0.270592	0.283187	0.384004	0.123157	0.121596
EVM0022758	16.0569	19.8284	15.0547	4.29385	4.23765	5.4208	1.46167	2.45851	2.50725	0	0	0	1.58162	2.50503	2.86327	3.90518	2.76457	2.38268	2.61551	1.92441	2.77694
EVM0007067	57.8933	60.3949	57.7201	36.0318	38.6401	39.8057	53.8736	50.1313	55.64	18.1292	16.7704	18.1846	30.9213	35.947	39.5804	34.18	32.619	33.3348	21.5966	21.1015	19.0315
EVM0008893	39.3283	45.1986	43.0013	17.3018	17.2396	14.0457	5.56793	6.4196	7.56494	38.1687	39.1668	32.6577	28.0797	23.6719	28.4923	17.0846	14.2215	16.4077	7.86211	9.5922	8.39264
EVM0004683	28.1651	24.9713	27.04	13.5453	10.5979	11.4541	21.9087	16.8757	21.4372	6.94305	6.10722	7.7334	10.6797	11.7297	12.0709	13.5395	13.9614	13.3525	13.1591	12.8039	12.1717
EVM0027938	4.96231	6.55378	7.0195	4.3347	3.39318	4.22203	2.96719	2.1265	2.6374	1.82455	1.10163	0.779343	2.18327	2.28834	2.19581	2.61953	2.11278	2.62571	2.74844	3.42574	2.01752
EVM0013214	41.0036	43.0038	46.0895	15.6557	19.6106	17.8618	43.3378	45.5496	44.1227	17.3217	20.4986	19.9236	49.8538	53.0379	47.7557	53.4464	49.588	46.8668	33.6703	34.615	36.4921
EVM0019014	0	0	0	0	0	0	0	0	0	0	0	0	0	0	0	0	0	0	0	0	0
EVM0011052	15.0014	18.8578	18.2808	17.6768	17.4976	15.0065	39.4002	37.5176	40.3227	18.6472	21.5315	21.3476	22.2588	23.5825	20.4986	31.8604	31.9859	32.4647	27.1743	24.7654	23.8732
EVM0025734	1.11291	2.36099	3.43313	0	0	0	12.382	14.3242	16.6331	0	0	0	16.3682	16.2029	14.9849	13.0661	14.6721	15.5808	16.7389	16.8911	22.1066
EVM0021519	0.322186	0.170876	0.237177	0.0780072	0	0.0743629	11.3367	6.32289	7.89045	0.147355	0.0729553	0.1518	9.24935	7.36681	7.80552	3.88044	3.06074	4.004	18.4084	20.7964	17.1925
EVM0012626	0.513909	2.72559	1.51326	0	0	0	0	0.15281	0	0	0.465475	0.161422	0.226105	0	0	0.242729	0	0	0	0	0
EVM0010452	17.0229	17.6497	17.6672	19.8307	19.4295	20.5146	19.1805	19.4793	21.0671	25.7818	23.8545	25.1461	16.9436	18.6867	15.8833	14.7294	17.1373	14.8633	11.0179	12.7125	12.2961
EVM0021981	0.321476	0.426249	1.41993	3.11341	2.21061	2.96796	0.829527	1.9357	0.382188	2.57304	1.96545	1.74186	3.18241	3.36027	4.26758	3.98577	4.25378	2.96785	2.78614	2.77999	2.74475
EVM0027511	0.165664	0	0	6.41766	8.46248	6.80611	81.6866	97.6086	86.2643	0.0757684	0	0.234162	126.496	134.526	129.422	24.7649	26.7545	26.2351	12.656	12.5864	11.7196
EVM0007653	20.8408	21.5948	21.4977	13.3001	14.1857	13.332	12.041	12.1358	10.9201	14.1506	15.9636	16.0019	16.7256	18.6577	18.7429	19.1401	19.1177	20.1446	14.8247	16.9257	15.9658
EVM0018804	586.706	582.797	610.179	421.876	432.405	411.978	127.911	117.974	113.544	1272.77	1277.28	1219.4	135.441	124.31	132.361	79.8751	83.0376	83.8369	97.5343	96.4073	91.0334
EVM0020848	71.6848	75.6961	77.01	21.6998	22.6444	24.3513	8.96375	8.34464	8.18893	25.0802	26.5649	24.2936	15.8515	15.1402	14.6908	14.2042	12.5269	14.8016	9.39836	9.59445	10.1386
EVM0020069	40.1252	39.0093	40.9954	7.49708	8.51963	9.17417	8.47076	11.0803	10.1682	41.0251	41.9086	43.6212	6.38235	7.62201	6.44845	5.84585	5.62914	5.98566	3.446	3.67181	3.65231
EVM0021657	48.9976	49.0243	51.2308	175.542	198.266	183.511	29.2807	34.7184	34.6366	424.606	422.646	407.551	44.1241	43.4058	42.7168	33.5811	41.4068	32.772	24.8966	21.9797	23.3117
EVM0025538	1.31272	1.58232	1.69845	2.3693	3.34109	3.36038	1.11977	1.22423	1.4755	0.873289	0.594499	0.899631	1.57516	1.40332	0.792101	1.60641	0.890764	1.52546	0.919348	0.810844	0.727786
EVM0016723	0	0	0	0.313065	0	0.07461	0.151658	0	0.153722	0.29569	0.365988	0.380762	0.533338	0.527949	0.429121	0.687059	0.877402	0.573901	0.207524	0	0.591417
EVM0020053	5.58575	4.39595	3.47821	0.290842	0.708019	0.443607	0.507213	0.910823	0.45699	0.988918	0.544012	1.07535	0.396382	0.627803	0.47839	0.0851048	0.570582	0.426529	0.539818	0.741984	0.586062
EVM0027742	3.2205	3.12535	3.63182	0.331805	0.269247	0	0.128589	0	0.325847	0	0.18619	0.193706	0.271326	0.179056	0.181923	0.291274	0.278977	0.194641	0.175957	0.169298	0.0835758
EVM0012116	5.53295	7.61379	7.77922	0	0	0	0	0	0	0.0455956	0.135446	0	0.131586	0	0	0	0.067648	0	0	0	0
EVM0005163	3.26146	4.00008	3.35129	113.415	111.135	101.2	269.065	294.073	308.398	19.112	17.4475	19.4964	140.042	153.009	157.961	260.672	267.994	224.447	85.6489	81.3374	82.9168
EVM0013784	20.4885	23.984	23.7957	0.0790542	0.320747	0.904333	0	0	0	0	0	0	0.215483	0.426611	0.21672	0	0	0	0	0	0
EVM0024401	0.24144	0	0.0592453	14.0881	15.3573	13.8758	39.5324	47.1671	51.8961	67.9667	76.8131	72.5764	37.2855	37.3031	34.3746	43.1057	37.108	37.7208	66.1846	68.2285	61.1793
EVM0019959	1.12965	1.67755	0.665272	64.3291	61.4777	65.7041	265.415	318.129	299.431	0.82665	0.306954	0.425793	120.625	134.903	134.964	189.197	205.432	175.204	101.674	97.6869	113.947
EVM0000819	1.1957	1.62503	0.880216	36.0429	39.3856	42.6039	32.852	27.4987	31.913	60.463	62.6454	56.0195	21.9471	27.6815	27.6287	31.9261	29.4625	26.429	29.1214	34.6664	29.8973
EVM0009725	0	0	0	0.320156	0.487114	0.457799	0.310187	0.29489	0.471611	1.28515	1.42226	0.934526	0.109084	0.107981	0.43884	0.234207	0.224319	0	0.106112	0.102096	0.100802
EVM0002774	6.95229	5.79789	6.3533	30.508	27.0357	24.4791	13.5868	15.483	13.498	21.4905	22.4523	22.7712	34.554	36.8986	36.7255	26.7678	26.7438	28.1248	19.8844	19.0727	19.4742
EVM0001451	1.02128	1.77268	1.73146	10.835	11.4462	9.98592	22.4325	18.7589	23.8857	9.25696	7.77865	9.36121	16.176	18.8633	17.8095	19.5359	20.7902	17.5381	21.8745	23.4553	20.2703
EVM0007996	0	0	0	0	0	0	0.24153	0	0	0	0	0	0	0	0.341707	0	0	0.548394	0.16525	0.158997	0
EVM0015493	6.65188	6.29493	9.34551	0	0	0.060208	0	0	0.620244	0.0596533	0.0590684	0	0	0	0	0	0	0	0	0.080564	0.159085
EVM0003577	39.901	38.3871	40.4979	88.5196	91.7736	92.9206	73.5113	75.237	74.9527	130.26	134.656	135.907	43.9174	53.0863	46.9852	71.6585	70.567	77.3347	25.1901	27.9215	23.7679
EVM0008431	0.428425	0.555431	0.513962	3.78037	4.67625	2.549	1.29533	1.35884	1.44877	0.0870867	0.172466	0.358855	1.57079	1.18174	2.02216	1.68627	2.97175	2.09592	1.8336	1.35256	1.39347
EVM0009371	0.0782995	0.0276849	0.0768536	5.51039	4.4612	6.02403	42.8573	39.5797	37.607	88.8833	97.657	86.0553	22.3577	29.6682	32.2567	39.0902	40.5923	34.4005	25.837	27.8256	28.4279
EVM0008621	1.07978	0.76357	1.3248	1.04574	0.972326	0.830737	14.6066	20.1472	16.5169	0.329233	0.244504	0	72.686	55.0218	60.8001	31.7475	35.0475	33.1004	32.3491	34.3486	34.2424
EVM0025684	0.411127	0.381583	0.151326	2.33923	3.07951	4.08032	301.188	332.132	322.491	1.6923	0.37238	0.67797	281.772	267.376	278.479	257.851	236.851	255.102	207.651	170.652	205.095
EVM0004436	9.98111	10.6871	9.51954	4.55964	5.36496	4.95516	0.971885	0.671969	0.358221	3.78979	4.00849	3.19427	0.124285	0.615145	0.124999	0.133422	0	0.133737	0	0.116324	0.114849
EVM0023667	0.583334	0.123752	0.45805	0.790922	1.08877	1.18481	0.821028	0.988684	1.33152	0.106718	0	0	0.230985	0.609737	0.851809	0.413279	0.079166	0.248553	0.149795	0	0
EVM0001325	0.906523	1.53852	1.06774	7.55032	9.88478	10.2942	1.36097	2.99204	3.8798	0.165843	0.0821087	0.341692	6.10231	7.46198	7.82212	2.18365	1.8454	3.47634	5.81968	4.81552	5.19675
EVM0006115	0	0	0	0.275266	0.418814	0.524812	6.13396	4.75392	5.33887	0	0.0643598	0	5.62731	5.94181	7.16886	7.45061	7.71464	7.26635	11.2217	14.3083	12.2202
EVM0026485	12.3649	13.8477	13.0848	13.2047	14.6139	13.4287	17.0925	13.6398	14.2013	27.5188	28.0239	29.9094	15.592	16.8048	15.938	19.7888	21.8001	19.7963	20.1285	18.6167	20.1985
EVM0009003	2.47673	2.06418	1.82325	5.39696	3.99709	6.61478	10.8728	8.99523	10.4318	2.58917	3.76556	3.6675	3.73608	3.69833	3.52269	2.88273	4.3216	2.63827	3.18002	2.29475	3.23666
EVM0010001	0	0	0	0.11165	0	0	1.94712	1.64542	2.96042	0	0	0	0.152166	0.301256	0.765197	0.980117	0.312912	0.982431	1.03614	0.996931	0.84368
EVM0007037	0.1946	0.722464	0	2.16735	2.00723	0.898304	2.00856	1.90951	2.59113	0	0	0	1.15585	2.03408	0.645826	0.965089	1.32049	0.829171	0.749575	1.08181	0.593388
EVM0019666	0.257408	0.54608	0.757964	2.11899	2.65507	1.30706	1.81147	1.72214	1.22408	1.29501	1.51546	1.2128	1.35902	1.34529	0.512561	0.911837	1.39734	1.82798	0.991502	1.43097	0.313962
EVM0025802	0	0	0	0	0	0.191945	0.0975409	0.370923	0.197736	0	0	0	0	0	0.137997	0.294594	0	0.147644	0.133471	0.12842	0
EVM0006935	0	0	0.108527	0	0.6517	1.32704	0.933732	0.986319	0.525798	0.202279	0.300443	0.20838	0	0.288932	0	0	0	0	0	0.273185	0.404583
EVM0024821	4.85302	4.24212	5.02804	10.3575	9.35815	11.7819	5.86074	5.05063	7.35081	4.52138	4.51775	5.03886	8.83732	8.86544	10.0811	6.94018	6.58619	6.31835	6.69264	5.44015	6.30292
EVM0018213	6.68164	4.31408	6.78637	10.4099	11.0727	11.8546	0.218069	0.207315	0.276295	2.17901	1.99977	3.06598	0.0766886	0.379568	0.617032	0.329307	0.551956	0.165042	0.0745995	0.0717763	0
EVM0001290	15.0612	17.7351	13.1992	40.1994	43.5934	44.4462	15.0995	15.3146	16.8824	15.4989	15.6718	17.0647	22.4236	20.0886	21.4218	29.2804	26.7058	23.938	30.9062	34.0005	30.0703
EVM0017275	1.31487	0.418415	0.258117	3.43822	2.32498	2.18506	2.09739	1.4075	2.25098	0.240548	1.07185	0.743411	4.85943	5.32572	5.06188	2.98097	2.14133	2.42775	1.85706	3.24869	1.44338
EVM0025280	6.69677	14.2069	12.3729	5.05499	5.80461	5.36437	11.5509	16.428	16.2039	5.40502	5.17362	4.26885	16.7684	15.1835	15.5574	17.0244	14.8355	17.764	12.2653	16.5459	13.6936
EVM0000553	81.89	83.3508	77.5445	63.4796	63.3047	58.5152	67.0397	64.7562	61.8955	59.3739	57.9459	65.8853	64.2699	61.5128	61.0886	70.9801	65.2179	75.4888	56.7414	54.3843	56.7498
EVM0022050	9.40794	10.3089	9.62244	10.1511	11.2956	10.6941	11.0809	11.9458	11.8497	8.0888	7.88155	9.07823	13.4245	15.6882	14.7392	13.2906	13.1129	14.5257	17.0127	18.3234	17.4019
EVM0010823	0	0	0.104719	0	0	0	2.10226	1.04688	2.13087	0	0	0	5.35116	9.61839	6.37329	1.6629	2.60623	1.81836	20.9585	22.0106	26.1559
