# Supplementary material for: Genome-wide identification and co-expression network analysis of Aux/IAA gene family in Salvia miltiorrhiza
Source: PeerJ. 2023 Apr 17;11:e15212. doi: 10.7717/peerj.15212 (PMC10117383; doi:10.7717/peerj.15212)
Supplement: Supplemental Information 4 [file peerj-11-15212-s004.xlsx]

## Sheet: Sheet1
	Genes	Primer name	Sequence (5'-3')
	SmUBQ	SmUBQ-F	ACCCTCACGGGGAAGACCATC
		SmUBQ-R	ACCACGGAGACGGAGGACAAG
	EVM0004349	EVM0004349_1_F	GCCAGCCCAATGGAGGAG
		EVM0004349_1_R	AACTTATCGGCGGCCACC
	EVM0026407	EVM0026407_1_F	GGCTTACTTGGCGGTGGT
		EVM0026407_1_R	ACTCACCCCATGCACAGC
	EVM0003584	EVM0003584_1_F	TCCAAGCGCGGATTTGGT
		EVM0003584_1_R	GGCCACCCCACAACTTGT
	EVM0006475	EVM0006475_1_F	CTGAGTATGCGCCGACGT
		EVM0006475_1_R	CTACAGGCAGCCCAACCC
	EVM0000041	EVM0000041_1_F	TCGATCCCGACGTGGAGT
		EVM0000041_1_R	GGGTGCTGGCTTTCGTCT
	EVM0017797	EVM0017797_1_F	TGGATGGCAGCTCCCTCT
		EVM0017797_1_R	GAAACGGGCTCCCCAGTC
	EVM0001290	EVM0001290_1_F	GGCTTGGCCTGCTAGGAC
		EVM0001290_1_R	CCCCGGCTGCTTCAATGA
	EVM0011285	EVM0011285_1_F	GCCTCTCGAAGTGCAGCA
		EVM0011285_1_R	TTGCTGCTGGTGGAGAGC
	EVM0019866	EVM0019866_1_F	GGTGGAGCACGTTCGTGA
		EVM0019866_1_R	GTGGTGGCACCTGAGGTC
	EVM0001762	EVM0001762_1_F	CAGCTCCCGGGAACTTGG
		EVM0001762_1_R	TTTCCCGTTCGCAGGTCC
	EVM0001254	EVM0001254_1_F	CTACCCGACGGACGAGGA
		EVM0001254_1_R	GGATGACATCCGGGTGGC
	EVM0007532	EVM0007532_1_F	GGGTTCAACCAGCCCCTC
		EVM0007532_1_R	AGGTGGGGCAGTCCAGAA
