# Supplementary material for: Genome-wide identification and co-expression network analysis of Aux/IAA gene family in Salvia miltiorrhiza
Source: PeerJ. 2023 Apr 17;11:e15212. doi: 10.7717/peerj.15212 (PMC10117383; doi:10.7717/peerj.15212)
Supplement: Supplemental Information 5 [file peerj-11-15212-s005.xlsx]

## Sheet: Sheet1
Class	Geneid	Root1	Root2	Root3	Stem1	Stem2	Stem3	Flower3	Flower2	Flower1	Leaf1	Leaf2	Leaf3
qPCR	EVM0000041	1.64688	1.82453	1.3291	3.15448	3.48728	2.43272	1.27058	1.46909	2.22765	1.97511	1.98889	2.06917
qPCR	EVM0001254	4.09283	4.94918	3.6557	7.0952	8.56384	8.91754	14.555	15.6992	13.7799	8.83537	7.89611	7.94487
qPCR	EVM0001290	15.1533	16.3379	15.216	45.1853	46.8609	45.6975	26.426	25.2562	27.4018	31.7801	31.3331	31.2357
qPCR	EVM0001762	16.4855	18.8171	20.4022	12.6251	11.7938	12.3662	25.7249	22.0587	24.5837	11.6785	13.3899	13.255
qPCR	EVM0003584	5.6284	6.03883	7.17546	6.89202	6.80009	7.40623	12.505	14.0236	11.8752	8.04811	7.26604	8.65666
qPCR	EVM0004349	2.59962	2.56053	4.19194	3.05717	7.29638	9.25733	1.74233	3.31283	5.12151	4.92572	5.55017	4.54938
qPCR	EVM0006475	2.92266	3.3585	3.55598	1.9165	1.94395	2.24857	2.14248	1.54799	1.1582	1.39241	2.37146	1.09015
qPCR	EVM0007532	0	0.0740027	0.0684776	2.83779	2.1931	2.5764	1.44017	1.43139	1.32706	0.957247	1.83253	1.44631
qPCR	EVM0011285	9.96147	10.7931	10.3673	5.72897	5.86351	5.3627	10.4997	12.1975	9.81708	5.86294	6.36181	6.10271
qPCR	EVM0017797	4.79856	4.34606	4.5288	7.22117	5.43907	6.23633	7.72364	8.26472	8.03937	2.76867	3.20959	3.20002
qPCR	EVM0019866	24.3673	24.8375	25.4745	21.5096	26.8047	27.3006	62.2813	65.6631	69.0432	27.8617	25.8068	22.7823
qPCR	EVM0026407	14.888	15.032	15.3865	13.8741	12.4003	14.5054	5.18661	5.64787	4.74879	5.09604	5.08194	5.11917
TPM	EVM0000041	2.86417	2.22961	3.29361	24.1622	24.2262	24.8075	0.247259	0.831995	0.2546	2.351	3.18629	3.20143
TPM	EVM0001254	0.914807	1.00143	0.438321	9.0288	9.10847	10.3117	10.2728	11.3176	10.2919	2.05484	0.61735	1.40859
TPM	EVM0001290	9.74708	11.1483	8.33968	28.0924	30.7058	31.2167	10.1143	10.3739	11.488	10.9469	10.9914	12.0304
TPM	EVM0001762	34.4935	37.4646	34.264	29.657	31.3623	28.7821	48.2716	51.8677	48.4425	30.1289	28.4637	29.3234
TPM	EVM0003584	29.0989	32.3093	30.5471	9.60211	9.86721	12.6436	94.7969	101.513	91.3017	21.9989	23.0632	23.3452
TPM	EVM0004349	7.61956	7.62826	8.54159	37.6622	39.0425	45.9507	6.56233	7.78555	6.1102	18.2991	15.0291	18.6684
TPM	EVM0006475	322.512	327.204	329.995	202.047	189.341	188.595	199.071	183.488	186.235	268.794	244.931	248.634
TPM	EVM0007532	3.28685	3.29733	2.85962	16.5083	17.5249	15.0797	1.47008	1.49409	2.11922	2.4178	1.57072	1.95336
TPM	EVM0011285	37.3362	39.0293	37.5349	32.488	31.2551	32.5376	42.4979	44.9019	43.7445	19.5968	20.443	20.9743
TPM	EVM0017797	6.03188	7.30928	8.63752	14.8741	13.4846	13.0145	32.1864	33.3438	31.6683	10.2985	10.4624	12.8761
TPM	EVM0019866	4.90689	4.93113	4.54303	4.07367	3.71279	3.29782	5.70399	5.42739	5.93373	3.66265	4.01626	3.34764
TPM	EVM0026407	35.08	28.7913	30.7224	41.3371	39.8487	41.6661	3.44885	3.90447	4.34779	5.10236	4.52824	2.99799
