# Supplementary material for: Genome-wide identification and co-expression network analysis of Aux/IAA gene family in Salvia miltiorrhiza
Source: PeerJ. 2023 Apr 17;11:e15212. doi: 10.7717/peerj.15212 (PMC10117383; doi:10.7717/peerj.15212)
Supplement: Supplemental Information 6 [file peerj-11-15212-s006.xlsx]

## Sheet: Sheet1
Gene ID	Class	Annotation
EVM0003412.1	TF	Alfin-like
EVM0003939.1	TF	Alfin-like
EVM0009423.1	TF	Alfin-like
EVM0015464.1	TF	Alfin-like
EVM0018296.1	TF	Alfin-like
EVM0026402.1	TF	Alfin-like
EVM0026652.1	TF	Alfin-like
EVM0001721.1	TF	AP2/ERF-AP2
EVM0003092.1	TF	AP2/ERF-AP2
EVM0003694.1	TF	AP2/ERF-AP2
EVM0004683.1	TF	AP2/ERF-AP2
EVM0010450.1	TF	AP2/ERF-AP2
EVM0011604.1	TF	AP2/ERF-AP2
EVM0017039.1	TF	AP2/ERF-AP2
EVM0017253.1	TF	AP2/ERF-AP2
EVM0017785.1	TF	AP2/ERF-AP2
EVM0018039.1	TF	AP2/ERF-AP2
EVM0019808.1	TF	AP2/ERF-AP2
EVM0020053.1	TF	AP2/ERF-AP2
EVM0021563.1	TF	AP2/ERF-AP2
EVM0021943.1	TF	AP2/ERF-AP2
EVM0022603.1	TF	AP2/ERF-AP2
EVM0024569.1	TF	AP2/ERF-AP2
EVM0024791.1	TF	AP2/ERF-AP2
EVM0026717.1	TF	AP2/ERF-AP2
EVM0028027.1	TF	AP2/ERF-AP2
EVM0000371.1	TF	AP2/ERF-ERF
EVM0000683.1	TF	AP2/ERF-ERF
EVM0000764.1	TF	AP2/ERF-ERF
EVM0001028.1	TF	AP2/ERF-ERF
EVM0001177.1	TF	AP2/ERF-ERF
EVM0001404.1	TF	AP2/ERF-ERF
EVM0001578.1	TF	AP2/ERF-ERF
EVM0002063.1	TF	AP2/ERF-ERF
EVM0002238.1	TF	AP2/ERF-ERF
EVM0002273.1	TF	AP2/ERF-ERF
EVM0002285.1	TF	AP2/ERF-ERF
EVM0002361.1	TF	AP2/ERF-ERF
EVM0002452.1	TF	AP2/ERF-ERF
EVM0002544.1	TF	AP2/ERF-ERF
EVM0002972.1	TF	AP2/ERF-ERF
EVM0003008.1	TF	AP2/ERF-ERF
EVM0003224.1	TF	AP2/ERF-ERF
EVM0003491.1	TF	AP2/ERF-ERF
EVM0003771.1	TF	AP2/ERF-ERF
EVM0004268.1	TF	AP2/ERF-ERF
EVM0004344.1	TF	AP2/ERF-ERF
EVM0004586.1	TF	AP2/ERF-ERF
EVM0004689.2	TF	AP2/ERF-ERF
EVM0005121.1	TF	AP2/ERF-ERF
EVM0005203.1	TF	AP2/ERF-ERF
EVM0005667.1	TF	AP2/ERF-ERF
EVM0005681.1	TF	AP2/ERF-ERF
EVM0005916.1	TF	AP2/ERF-ERF
EVM0006141.1	TF	AP2/ERF-ERF
EVM0006157.1	TF	AP2/ERF-ERF
EVM0006215.1	TF	AP2/ERF-ERF
EVM0006300.1	TF	AP2/ERF-ERF
EVM0006466.1	TF	AP2/ERF-ERF
EVM0006476.1	TF	AP2/ERF-ERF
EVM0006798.1	TF	AP2/ERF-ERF
EVM0007060.1	TF	AP2/ERF-ERF
EVM0007244.1	TF	AP2/ERF-ERF
EVM0007321.1	TF	AP2/ERF-ERF
EVM0008219.2	TF	AP2/ERF-ERF
EVM0008367.1	TF	AP2/ERF-ERF
EVM0008489.1	TF	AP2/ERF-ERF
EVM0008699.1	TF	AP2/ERF-ERF
EVM0008855.1	TF	AP2/ERF-ERF
EVM0008976.1	TF	AP2/ERF-ERF
EVM0009353.1	TF	AP2/ERF-ERF
EVM0009746.1	TF	AP2/ERF-ERF
EVM0010290.1	TF	AP2/ERF-ERF
EVM0010408.1	TF	AP2/ERF-ERF
EVM0010603.1	TF	AP2/ERF-ERF
EVM0010620.1	TF	AP2/ERF-ERF
EVM0010789.1	TF	AP2/ERF-ERF
EVM0010867.1	TF	AP2/ERF-ERF
EVM0011202.1	TF	AP2/ERF-ERF
EVM0011582.1	TF	AP2/ERF-ERF
EVM0011953.1	TF	AP2/ERF-ERF
EVM0012042.1	TF	AP2/ERF-ERF
EVM0012286.1	TF	AP2/ERF-ERF
EVM0012657.1	TF	AP2/ERF-ERF
EVM0012789.1	TF	AP2/ERF-ERF
EVM0012895.1	TF	AP2/ERF-ERF
EVM0012907.1	TF	AP2/ERF-ERF
EVM0013982.1	TF	AP2/ERF-ERF
EVM0013994.1	TF	AP2/ERF-ERF
EVM0014008.1	TF	AP2/ERF-ERF
EVM0014460.1	TF	AP2/ERF-ERF
EVM0014487.1	TF	AP2/ERF-ERF
EVM0014533.1	TF	AP2/ERF-ERF
EVM0014575.1	TF	AP2/ERF-ERF
EVM0015118.1	TF	AP2/ERF-ERF
EVM0015183.1	TF	AP2/ERF-ERF
EVM0015493.1	TF	AP2/ERF-ERF
EVM0015522.1	TF	AP2/ERF-ERF
EVM0015538.1	TF	AP2/ERF-ERF
EVM0015666.1	TF	AP2/ERF-ERF
EVM0015940.1	TF	AP2/ERF-ERF
EVM0016034.1	TF	AP2/ERF-ERF
EVM0016090.1	TF	AP2/ERF-ERF
EVM0016128.3	TF	AP2/ERF-ERF
EVM0016200.1	TF	AP2/ERF-ERF
EVM0016333.1	TF	AP2/ERF-ERF
EVM0016435.1	TF	AP2/ERF-ERF
EVM0016453.1	TF	AP2/ERF-ERF
EVM0016580.1	TF	AP2/ERF-ERF
EVM0016734.1	TF	AP2/ERF-ERF
EVM0016785.1	TF	AP2/ERF-ERF
EVM0017073.1	TF	AP2/ERF-ERF
EVM0017196.1	TF	AP2/ERF-ERF
EVM0017263.1	TF	AP2/ERF-ERF
EVM0017379.1	TF	AP2/ERF-ERF
EVM0017454.1	TF	AP2/ERF-ERF
EVM0017480.1	TF	AP2/ERF-ERF
EVM0017531.1	TF	AP2/ERF-ERF
EVM0017536.1	TF	AP2/ERF-ERF
EVM0017611.1	TF	AP2/ERF-ERF
EVM0017736.1	TF	AP2/ERF-ERF
EVM0017883.1	TF	AP2/ERF-ERF
EVM0018048.1	TF	AP2/ERF-ERF
EVM0018399.1	TF	AP2/ERF-ERF
EVM0018423.1	TF	AP2/ERF-ERF
EVM0019043.1	TF	AP2/ERF-ERF
EVM0019195.1	TF	AP2/ERF-ERF
EVM0019348.1	TF	AP2/ERF-ERF
EVM0019487.1	TF	AP2/ERF-ERF
EVM0019530.1	TF	AP2/ERF-ERF
EVM0020040.1	TF	AP2/ERF-ERF
EVM0020135.1	TF	AP2/ERF-ERF
EVM0020647.1	TF	AP2/ERF-ERF
EVM0020823.1	TF	AP2/ERF-ERF
EVM0020942.1	TF	AP2/ERF-ERF
EVM0021157.1	TF	AP2/ERF-ERF
EVM0021887.1	TF	AP2/ERF-ERF
EVM0022148.1	TF	AP2/ERF-ERF
EVM0022165.1	TF	AP2/ERF-ERF
EVM0022227.1	TF	AP2/ERF-ERF
EVM0022322.1	TF	AP2/ERF-ERF
EVM0022383.1	TF	AP2/ERF-ERF
EVM0022420.1	TF	AP2/ERF-ERF
EVM0022891.1	TF	AP2/ERF-ERF
EVM0022950.1	TF	AP2/ERF-ERF
EVM0022970.1	TF	AP2/ERF-ERF
EVM0023017.2	TF	AP2/ERF-ERF
EVM0023038.1	TF	AP2/ERF-ERF
EVM0023360.1	TF	AP2/ERF-ERF
EVM0023705.1	TF	AP2/ERF-ERF
EVM0025108.1	TF	AP2/ERF-ERF
EVM0026210.1	TF	AP2/ERF-ERF
EVM0026712.1	TF	AP2/ERF-ERF
EVM0026731.1	TF	AP2/ERF-ERF
EVM0026843.1	TF	AP2/ERF-ERF
EVM0027082.1	TF	AP2/ERF-ERF
EVM0027226.1	TF	AP2/ERF-ERF
EVM0027236.1	TF	AP2/ERF-ERF
EVM0027328.1	TF	AP2/ERF-ERF
EVM0027478.1	TF	AP2/ERF-ERF
EVM0027494.1	TF	AP2/ERF-ERF
EVM0027577.1	TF	AP2/ERF-ERF
EVM0027598.1	TF	AP2/ERF-ERF
EVM0027742.1	TF	AP2/ERF-ERF
EVM0027972.1	TF	AP2/ERF-ERF
EVM0028033.1	TF	AP2/ERF-ERF
add_RNAAddG002773.1	TF	AP2/ERF-ERF
add_RNAAddG006869.1	TF	AP2/ERF-ERF
add_RNAAddG017720.1	TF	AP2/ERF-ERF
EVM0009803.1	TF	AP2/ERF-RAV
EVM0023442.1	TF	AP2/ERF-RAV
EVM0025028.1	TF	AP2/ERF-RAV
EVM0000387.1	TF	B3
EVM0000722.1	TF	B3
EVM0001149.1	TF	B3
EVM0002657.1	TF	B3
EVM0002658.1	TF	B3
EVM0005378.1	TF	B3
EVM0006114.1	TF	B3
EVM0006267.1	TF	B3
EVM0006273.1	TF	B3
EVM0006866.1	TF	B3
EVM0006894.1	TF	B3
EVM0006935.1	TF	B3
EVM0007037.1	TF	B3
EVM0007230.1	TF	B3
EVM0007623.1	TF	B3
EVM0007688.3	TF	B3
EVM0007996.1	TF	B3
EVM0008425.1	TF	B3
EVM0009003.1	TF	B3
EVM0009441.1	TF	B3
EVM0010001.1	TF	B3
EVM0011052.1	TF	B3
EVM0011262.1	TF	B3
EVM0012328.1	TF	B3
EVM0013018.2	TF	B3
EVM0014946.1	TF	B3
EVM0015338.1	TF	B3
EVM0016264.1	TF	B3
EVM0018242.1	TF	B3
EVM0019666.1	TF	B3
EVM0022690.1	TF	B3
EVM0023613.1	TF	B3
EVM0023901.1	TF	B3
EVM0024012.1	TF	B3
EVM0024698.1	TF	B3
EVM0024779.1	TF	B3
EVM0024821.1	TF	B3
EVM0025802.1	TF	B3
EVM0026487.1	TF	B3
EVM0026990.1	TF	B3
EVM0027069.1	TF	B3
EVM0027621.1	TF	B3
EVM0028084.1	TF	B3
add_RNAAddG007531.1	TF	B3
EVM0000097.1	TF	B3-ARF
EVM0002307.1	TF	B3-ARF
EVM0002769.1	TF	B3-ARF
EVM0002929.1	TF	B3-ARF
EVM0003487.2	TF	B3-ARF
EVM0004078.1	TF	B3-ARF
EVM0005784.1	TF	B3-ARF
EVM0006594.1	TF	B3-ARF
EVM0008338.1	TF	B3-ARF
EVM0008642.1	TF	B3-ARF
EVM0009800.1	TF	B3-ARF
EVM0010527.1	TF	B3-ARF
EVM0010799.1	TF	B3-ARF
EVM0011285.1	TF	B3-ARF
EVM0012956.1	TF	B3-ARF
EVM0013898.1	TF	B3-ARF
EVM0013921.1	TF	B3-ARF
EVM0015156.1	TF	B3-ARF
EVM0015157.1	TF	B3-ARF
EVM0015919.1	TF	B3-ARF
EVM0016473.1	TF	B3-ARF
EVM0019627.1	TF	B3-ARF
EVM0019866.1	TF	B3-ARF
EVM0022806.2	TF	B3-ARF
EVM0025308.1	TF	B3-ARF
EVM0028006.1	TF	B3-ARF
EVM0004297.1	TF	BBR-BPC
EVM0005306.1	TF	BBR-BPC
EVM0009562.2	TF	BBR-BPC
EVM0010502.1	TF	BBR-BPC
EVM0022481.1	TF	BBR-BPC
EVM0024855.1	TF	BBR-BPC
EVM0003639.1	TF	BES1
EVM0005322.1	TF	BES1
EVM0011101.1	TF	BES1
EVM0016280.1	TF	BES1
EVM0017533.1	TF	BES1
EVM0017631.1	TF	BES1
EVM0019712.1	TF	BES1
EVM0021485.1	TF	BES1
EVM0023172.1	TF	BES1
EVM0000008.1	TF	bHLH
EVM0000025.1	TF	bHLH
EVM0000041.1	TF	bHLH
EVM0000400.1	TF	bHLH
EVM0000686.1	TF	bHLH
EVM0000829.3	TF	bHLH
EVM0000894.1	TF	bHLH
EVM0000953.1	TF	bHLH
EVM0001407.1	TF	bHLH
EVM0001715.1	TF	bHLH
EVM0001784.1	TF	bHLH
EVM0001912.1	TF	bHLH
EVM0002007.1	TF	bHLH
EVM0002021.1	TF	bHLH
EVM0002528.1	TF	bHLH
EVM0003170.1	TF	bHLH
EVM0003277.1	TF	bHLH
EVM0003328.1	TF	bHLH
EVM0003343.1	TF	bHLH
EVM0004362.2	TF	bHLH
EVM0004504.1	TF	bHLH
EVM0004965.1	TF	bHLH
EVM0005141.1	TF	bHLH
EVM0005148.1	TF	bHLH
EVM0005260.1	TF	bHLH
EVM0005508.1	TF	bHLH
EVM0005994.1	TF	bHLH
EVM0006630.1	TF	bHLH
EVM0006721.1	TF	bHLH
EVM0006752.1	TF	bHLH
EVM0007203.1	TF	bHLH
EVM0007719.1	TF	bHLH
EVM0007880.1	TF	bHLH
EVM0008117.1	TF	bHLH
EVM0008499.1	TF	bHLH
EVM0008527.1	TF	bHLH
EVM0008834.1	TF	bHLH
EVM0008994.1	TF	bHLH
EVM0009040.1	TF	bHLH
EVM0009422.1	TF	bHLH
EVM0009689.1	TF	bHLH
EVM0009835.1	TF	bHLH
EVM0009980.1	TF	bHLH
EVM0010344.1	TF	bHLH
EVM0010391.1	TF	bHLH
EVM0010612.1	TF	bHLH
EVM0010694.1	TF	bHLH
EVM0010715.1	TF	bHLH
EVM0010995.1	TF	bHLH
EVM0011009.1	TF	bHLH
EVM0011562.2	TF	bHLH
EVM0011600.1	TF	bHLH
EVM0011655.1	TF	bHLH
EVM0011660.1	TF	bHLH
EVM0011877.1	TF	bHLH
EVM0011952.1	TF	bHLH
EVM0012120.1	TF	bHLH
EVM0012294.1	TF	bHLH
EVM0012451.1	TF	bHLH
EVM0012520.1	TF	bHLH
EVM0012626.1	TF	bHLH
EVM0012747.1	TF	bHLH
EVM0013400.1	TF	bHLH
EVM0013513.1	TF	bHLH
EVM0013567.1	TF	bHLH
EVM0013607.1	TF	bHLH
EVM0013684.1	TF	bHLH
EVM0013828.1	TF	bHLH
EVM0014200.2	TF	bHLH
EVM0014202.1	TF	bHLH
EVM0014538.1	TF	bHLH
EVM0014628.3	TF	bHLH
EVM0014731.1	TF	bHLH
EVM0016243.1	TF	bHLH
EVM0016326.1	TF	bHLH
EVM0016497.1	TF	bHLH
EVM0016557.1	TF	bHLH
EVM0017292.1	TF	bHLH
EVM0017616.1	TF	bHLH
EVM0017740.1	TF	bHLH
EVM0017796.2	TF	bHLH
EVM0018536.1	TF	bHLH
EVM0018709.1	TF	bHLH
EVM0018995.1	TF	bHLH
EVM0019104.1	TF	bHLH
EVM0019524.1	TF	bHLH
EVM0019944.1	TF	bHLH
EVM0020155.1	TF	bHLH
EVM0020238.1	TF	bHLH
EVM0020705.1	TF	bHLH
EVM0020969.1	TF	bHLH
EVM0021080.1	TF	bHLH
EVM0021111.1	TF	bHLH
EVM0021135.1	TF	bHLH
EVM0021167.1	TF	bHLH
EVM0021231.1	TF	bHLH
EVM0021408.1	TF	bHLH
EVM0021700.1	TF	bHLH
EVM0021757.1	TF	bHLH
EVM0022018.1	TF	bHLH
EVM0022254.1	TF	bHLH
EVM0022658.1	TF	bHLH
EVM0022828.1	TF	bHLH
EVM0022968.1	TF	bHLH
EVM0023392.1	TF	bHLH
EVM0023426.1	TF	bHLH
EVM0023458.1	TF	bHLH
EVM0023710.1	TF	bHLH
EVM0024256.1	TF	bHLH
EVM0024503.1	TF	bHLH
EVM0024997.1	TF	bHLH
EVM0025595.1	TF	bHLH
EVM0025692.1	TF	bHLH
EVM0025734.1	TF	bHLH
EVM0025815.2	TF	bHLH
EVM0025864.1	TF	bHLH
EVM0026134.1	TF	bHLH
EVM0026177.1	TF	bHLH
EVM0026408.1	TF	bHLH
EVM0026409.1	TF	bHLH
EVM0026583.1	TF	bHLH
EVM0027050.1	TF	bHLH
EVM0027052.1	TF	bHLH
EVM0027087.1	TF	bHLH
EVM0027421.1	TF	bHLH
EVM0027426.1	TF	bHLH
EVM0027599.1	TF	bHLH
EVM0027712.1	TF	bHLH
EVM0027739.1	TF	bHLH
EVM0027746.1	TF	bHLH
EVM0027938.1	TF	bHLH
EVM0027986.1	TF	bHLH
EVM0028008.1	TF	bHLH
add_RNAAddG004655.1	TF	bHLH
EVM0000072.1	TF	bZIP
EVM0000266.1	TF	bZIP
EVM0001048.1	TF	bZIP
EVM0001325.1	TF	bZIP
EVM0001709.1	TF	bZIP
EVM0001987.1	TF	bZIP
EVM0002511.2	TF	bZIP
EVM0002796.1	TF	bZIP
EVM0002817.1	TF	bZIP
EVM0004858.1	TF	bZIP
EVM0005118.2	TF	bZIP
EVM0005249.1	TF	bZIP
EVM0005285.1	TF	bZIP
EVM0005492.1	TF	bZIP
EVM0005495.1	TF	bZIP
EVM0005565.1	TF	bZIP
EVM0005764.1	TF	bZIP
EVM0006776.1	TF	bZIP
EVM0007052.1	TF	bZIP
EVM0007337.1	TF	bZIP
EVM0007433.1	TF	bZIP
EVM0008009.1	TF	bZIP
EVM0008193.1	TF	bZIP
EVM0008240.1	TF	bZIP
EVM0008381.2	TF	bZIP
EVM0008390.1	TF	bZIP
EVM0008486.1	TF	bZIP
EVM0008605.1	TF	bZIP
EVM0008851.1	TF	bZIP
EVM0009141.2	TF	bZIP
EVM0009243.1	TF	bZIP
EVM0009259.1	TF	bZIP
EVM0009470.1	TF	bZIP
EVM0009579.1	TF	bZIP
EVM0010321.1	TF	bZIP
EVM0011684.1	TF	bZIP
EVM0011962.3	TF	bZIP
EVM0012870.1	TF	bZIP
EVM0013326.2	TF	bZIP
EVM0014215.2	TF	bZIP
EVM0014370.1	TF	bZIP
EVM0014948.1	TF	bZIP
EVM0016202.1	TF	bZIP
EVM0016256.1	TF	bZIP
EVM0016270.1	TF	bZIP
EVM0016294.1	TF	bZIP
EVM0016341.1	TF	bZIP
EVM0016552.1	TF	bZIP
EVM0017440.1	TF	bZIP
EVM0018329.1	TF	bZIP
EVM0019008.1	TF	bZIP
EVM0019161.1	TF	bZIP
EVM0019563.4	TF	bZIP
EVM0019895.1	TF	bZIP
EVM0023746.1	TF	bZIP
EVM0023959.1	TF	bZIP
EVM0023984.1	TF	bZIP
EVM0024476.1	TF	bZIP
EVM0024581.1	TF	bZIP
EVM0024738.1	TF	bZIP
EVM0024760.2	TF	bZIP
EVM0026154.1	TF	bZIP
EVM0026927.1	TF	bZIP
EVM0027331.1	TF	bZIP
EVM0027392.1	TF	bZIP
EVM0027791.1	TF	bZIP
add_RNAAddG004925.1	TF	bZIP
EVM0000887.1	TF	C2C2-CO-like
EVM0000903.1	TF	C2C2-CO-like
EVM0001504.1	TF	C2C2-CO-like
EVM0003728.1	TF	C2C2-CO-like
EVM0012868.1	TF	C2C2-CO-like
EVM0015058.1	TF	C2C2-CO-like
EVM0016249.1	TF	C2C2-CO-like
EVM0017115.1	TF	C2C2-CO-like
EVM0017816.1	TF	C2C2-CO-like
EVM0020541.1	TF	C2C2-CO-like
EVM0021257.1	TF	C2C2-CO-like
EVM0022109.1	TF	C2C2-CO-like
EVM0022172.1	TF	C2C2-CO-like
EVM0026913.3	TF	C2C2-CO-like
EVM0000238.1	TF	C2C2-Dof
EVM0000805.1	TF	C2C2-Dof
EVM0001111.1	TF	C2C2-Dof
EVM0001629.1	TF	C2C2-Dof
EVM0003001.1	TF	C2C2-Dof
EVM0003407.2	TF	C2C2-Dof
EVM0007373.1	TF	C2C2-Dof
EVM0009192.1	TF	C2C2-Dof
EVM0010341.1	TF	C2C2-Dof
EVM0011355.1	TF	C2C2-Dof
EVM0013075.1	TF	C2C2-Dof
EVM0014574.3	TF	C2C2-Dof
EVM0014883.1	TF	C2C2-Dof
EVM0015462.1	TF	C2C2-Dof
EVM0015485.1	TF	C2C2-Dof
EVM0017529.1	TF	C2C2-Dof
EVM0017822.1	TF	C2C2-Dof
EVM0018007.1	TF	C2C2-Dof
EVM0018213.1	TF	C2C2-Dof
EVM0018373.1	TF	C2C2-Dof
EVM0020263.1	TF	C2C2-Dof
EVM0020467.1	TF	C2C2-Dof
EVM0020623.1	TF	C2C2-Dof
EVM0022653.1	TF	C2C2-Dof
EVM0023256.1	TF	C2C2-Dof
EVM0023531.1	TF	C2C2-Dof
EVM0023592.1	TF	C2C2-Dof
EVM0023791.1	TF	C2C2-Dof
EVM0024548.1	TF	C2C2-Dof
EVM0025991.1	TF	C2C2-Dof
EVM0026933.1	TF	C2C2-Dof
EVM0026950.1	TF	C2C2-Dof
EVM0027518.1	TF	C2C2-Dof
add_RNAAddG013881.1	TF	C2C2-Dof
EVM0000574.1	TF	C2C2-GATA
EVM0001696.1	TF	C2C2-GATA
EVM0001974.1	TF	C2C2-GATA
EVM0004597.1	TF	C2C2-GATA
EVM0006319.1	TF	C2C2-GATA
EVM0007391.1	TF	C2C2-GATA
EVM0007609.2	TF	C2C2-GATA
EVM0007627.1	TF	C2C2-GATA
EVM0007629.1	TF	C2C2-GATA
EVM0009201.1	TF	C2C2-GATA
EVM0009495.1	TF	C2C2-GATA
EVM0009787.1	TF	C2C2-GATA
EVM0010228.1	TF	C2C2-GATA
EVM0010632.2	TF	C2C2-GATA
EVM0011383.1	TF	C2C2-GATA
EVM0013078.1	TF	C2C2-GATA
EVM0014931.1	TF	C2C2-GATA
EVM0016330.1	TF	C2C2-GATA
EVM0016947.1	TF	C2C2-GATA
EVM0020125.1	TF	C2C2-GATA
EVM0022162.1	TF	C2C2-GATA
EVM0023471.2	TF	C2C2-GATA
EVM0025385.1	TF	C2C2-GATA
EVM0025416.1	TF	C2C2-GATA
EVM0025445.2	TF	C2C2-GATA
EVM0026418.1	TF	C2C2-GATA
EVM0027222.1	TF	C2C2-GATA
EVM0027302.1	TF	C2C2-GATA
EVM0009410.1	TF	C2C2-LSD
EVM0019031.1	TF	C2C2-LSD
EVM0021318.1	TF	C2C2-LSD
EVM0021551.1	TF	C2C2-LSD
EVM0026356.1	TF	C2C2-LSD
EVM0004734.1	TF	C2C2-YABBY
EVM0005185.1	TF	C2C2-YABBY
EVM0010150.1	TF	C2C2-YABBY
EVM0015564.1	TF	C2C2-YABBY
EVM0019237.1	TF	C2C2-YABBY
EVM0019374.1	TF	C2C2-YABBY
EVM0020576.1	TF	C2C2-YABBY
EVM0024699.1	TF	C2C2-YABBY
EVM0025628.1	TF	C2C2-YABBY
EVM0000129.1	TF	C2H2
EVM0000334.2	TF	C2H2
EVM0000427.1	TF	C2H2
EVM0000583.1	TF	C2H2
EVM0000856.1	TF	C2H2
EVM0001605.1	TF	C2H2
EVM0001606.1	TF	C2H2
EVM0001681.1	TF	C2H2
EVM0001760.1	TF	C2H2
EVM0001848.1	TF	C2H2
EVM0002144.1	TF	C2H2
EVM0002170.1	TF	C2H2
EVM0002294.1	TF	C2H2
EVM0002328.2	TF	C2H2
EVM0002505.1	TF	C2H2
EVM0003585.1	TF	C2H2
EVM0003893.1	TF	C2H2
EVM0004324.1	TF	C2H2
EVM0004572.1	TF	C2H2
EVM0004778.1	TF	C2H2
EVM0004857.1	TF	C2H2
EVM0004957.1	TF	C2H2
EVM0007235.1	TF	C2H2
EVM0007340.1	TF	C2H2
EVM0007396.1	TF	C2H2
EVM0007397.1	TF	C2H2
EVM0007496.1	TF	C2H2
EVM0008431.1	TF	C2H2
EVM0008488.1	TF	C2H2
EVM0008649.1	TF	C2H2
EVM0008792.1	TF	C2H2
EVM0009216.1	TF	C2H2
EVM0009398.1	TF	C2H2
EVM0009541.1	TF	C2H2
EVM0009556.1	TF	C2H2
EVM0010553.1	TF	C2H2
EVM0010805.1	TF	C2H2
EVM0011178.1	TF	C2H2
EVM0011643.1	TF	C2H2
EVM0011868.1	TF	C2H2
EVM0012103.1	TF	C2H2
EVM0012402.1	TF	C2H2
EVM0012940.1	TF	C2H2
EVM0013339.1	TF	C2H2
EVM0013346.4	TF	C2H2
EVM0013516.1	TF	C2H2
EVM0013946.2	TF	C2H2
EVM0014303.1	TF	C2H2
EVM0014907.1	TF	C2H2
EVM0014974.1	TF	C2H2
EVM0015139.1	TF	C2H2
EVM0015337.1	TF	C2H2
EVM0015420.1	TF	C2H2
EVM0015423.1	TF	C2H2
EVM0015888.3	TF	C2H2
EVM0016108.1	TF	C2H2
EVM0016337.1	TF	C2H2
EVM0016528.1	TF	C2H2
EVM0016544.1	TF	C2H2
EVM0016656.1	TF	C2H2
EVM0016692.1	TF	C2H2
EVM0016997.1	TF	C2H2
EVM0017366.1	TF	C2H2
EVM0017445.1	TF	C2H2
EVM0018088.1	TF	C2H2
EVM0018237.1	TF	C2H2
EVM0018351.1	TF	C2H2
EVM0018356.1	TF	C2H2
EVM0018557.1	TF	C2H2
EVM0018611.1	TF	C2H2
EVM0018744.1	TF	C2H2
EVM0019045.1	TF	C2H2
EVM0019229.1	TF	C2H2
EVM0019282.1	TF	C2H2
EVM0019359.1	TF	C2H2
EVM0019396.1	TF	C2H2
EVM0019547.1	TF	C2H2
EVM0020081.1	TF	C2H2
EVM0020163.1	TF	C2H2
EVM0020877.1	TF	C2H2
EVM0020949.1	TF	C2H2
EVM0021177.1	TF	C2H2
EVM0021248.1	TF	C2H2
EVM0021432.1	TF	C2H2
EVM0021514.1	TF	C2H2
EVM0022068.1	TF	C2H2
EVM0022312.2	TF	C2H2
EVM0022664.1	TF	C2H2
EVM0022779.1	TF	C2H2
EVM0022963.1	TF	C2H2
EVM0023075.1	TF	C2H2
EVM0023314.1	TF	C2H2
EVM0023673.1	TF	C2H2
EVM0024107.1	TF	C2H2
EVM0024132.1	TF	C2H2
EVM0024741.1	TF	C2H2
EVM0024967.1	TF	C2H2
EVM0025418.1	TF	C2H2
EVM0025429.1	TF	C2H2
EVM0025454.1	TF	C2H2
EVM0025586.1	TF	C2H2
EVM0025657.1	TF	C2H2
EVM0025699.1	TF	C2H2
EVM0026248.1	TF	C2H2
EVM0026250.1	TF	C2H2
EVM0027490.1	TF	C2H2
EVM0027670.1	TF	C2H2
EVM0027759.1	TF	C2H2
EVM0027850.1	TF	C2H2
EVM0027983.1	TF	C2H2
EVM0001414.1	TF	C3H
EVM0001762.1	TF	C3H
EVM0001895.4	TF	C3H
EVM0003315.2	TF	C3H
EVM0003371.1	TF	C3H
EVM0004328.1	TF	C3H
EVM0005607.1	TF	C3H
EVM0005914.1	TF	C3H
EVM0006386.1	TF	C3H
EVM0006709.1	TF	C3H
EVM0007291.1	TF	C3H
EVM0007322.1	TF	C3H
EVM0010089.1	TF	C3H
EVM0010301.2	TF	C3H
EVM0010637.1	TF	C3H
EVM0010945.1	TF	C3H
EVM0012259.2	TF	C3H
EVM0012673.1	TF	C3H
EVM0013166.1	TF	C3H
EVM0013364.1	TF	C3H
EVM0013696.1	TF	C3H
EVM0013944.2	TF	C3H
EVM0014101.1	TF	C3H
EVM0014616.1	TF	C3H
EVM0014674.1	TF	C3H
EVM0015026.2	TF	C3H
EVM0015516.2	TF	C3H
EVM0015979.1	TF	C3H
EVM0016161.1	TF	C3H
EVM0016219.1	TF	C3H
EVM0016433.1	TF	C3H
EVM0016439.1	TF	C3H
EVM0016758.1	TF	C3H
EVM0016823.1	TF	C3H
EVM0017447.1	TF	C3H
EVM0017856.1	TF	C3H
EVM0019665.1	TF	C3H
EVM0019691.1	TF	C3H
EVM0019710.2	TF	C3H
EVM0019767.1	TF	C3H
EVM0020960.1	TF	C3H
EVM0021085.1	TF	C3H
EVM0021893.1	TF	C3H
EVM0022581.1	TF	C3H
EVM0022676.1	TF	C3H
EVM0024056.1	TF	C3H
EVM0024237.1	TF	C3H
EVM0025842.1	TF	C3H
EVM0025997.1	TF	C3H
EVM0026236.1	TF	C3H
EVM0026287.1	TF	C3H
EVM0026392.1	TF	C3H
EVM0026518.1	TF	C3H
EVM0026779.1	TF	C3H
EVM0027025.1	TF	C3H
EVM0027537.1	TF	C3H
EVM0011416.1	TF	CAMTA
EVM0011786.1	TF	CAMTA
EVM0012036.1	TF	CAMTA
EVM0022230.1	TF	CAMTA
EVM0002203.1	TF	CPP
EVM0004121.1	TF	CPP
EVM0005008.1	TF	CPP
EVM0013061.1	TF	CPP
EVM0020898.1	TF	CPP
EVM0021601.3	TF	CPP
EVM0023342.1	TF	CPP
EVM0027037.1	TF	CPP
EVM0003459.1	TF	CSD
EVM0005937.1	TF	CSD
EVM0008920.1	TF	CSD
EVM0014035.1	TF	CSD
EVM0005057.1	TF	DBB
EVM0009026.1	TF	DBB
EVM0014150.1	TF	DBB
EVM0017797.2	TF	DBB
EVM0024812.1	TF	DBB
EVM0011304.1	TF	DBP
EVM0017289.1	TF	DBP
EVM0001970.1	TF	DDT
EVM0011110.3	TF	DDT
EVM0011523.1	TF	DDT
EVM0013239.1	TF	DDT
EVM0013615.1	TF	DDT
EVM0022050.1	TF	DDT
EVM0023581.1	TF	DDT
EVM0026296.1	TF	DDT
EVM0001356.1	TF	E2F-DP
EVM0010141.1	TF	E2F-DP
EVM0013840.1	TF	E2F-DP
EVM0015209.1	TF	E2F-DP
EVM0017484.1	TF	E2F-DP
EVM0018191.1	TF	E2F-DP
EVM0025538.1	TF	E2F-DP
EVM0026355.1	TF	E2F-DP
EVM0004134.1	TF	EIL
EVM0006070.1	TF	EIL
EVM0010074.1	TF	EIL
EVM0010797.1	TF	EIL
EVM0019803.1	TF	EIL
EVM0024316.1	TF	EIL
EVM0024896.1	TF	EIL
EVM0000789.1	TF	FAR1
EVM0001024.1	TF	FAR1
EVM0001282.1	TF	FAR1
EVM0001978.1	TF	FAR1
EVM0002292.2	TF	FAR1
EVM0003485.1	TF	FAR1
EVM0003805.1	TF	FAR1
EVM0004263.1	TF	FAR1
EVM0004945.1	TF	FAR1
EVM0005256.4	TF	FAR1
EVM0005884.1	TF	FAR1
EVM0006833.1	TF	FAR1
EVM0008673.1	TF	FAR1
EVM0008712.1	TF	FAR1
EVM0009748.1	TF	FAR1
EVM0010375.1	TF	FAR1
EVM0010592.2	TF	FAR1
EVM0012150.1	TF	FAR1
EVM0013146.1	TF	FAR1
EVM0013416.1	TF	FAR1
EVM0014032.1	TF	FAR1
EVM0014304.5	TF	FAR1
EVM0016568.1	TF	FAR1
EVM0017265.1	TF	FAR1
EVM0018851.1	TF	FAR1
EVM0019014.1	TF	FAR1
EVM0019673.2	TF	FAR1
EVM0019889.1	TF	FAR1
EVM0019919.1	TF	FAR1
EVM0020323.1	TF	FAR1
EVM0020414.1	TF	FAR1
EVM0020740.1	TF	FAR1
EVM0021187.1	TF	FAR1
EVM0021738.1	TF	FAR1
EVM0022169.1	TF	FAR1
EVM0023756.1	TF	FAR1
EVM0024577.1	TF	FAR1
EVM0025078.1	TF	FAR1
EVM0025579.1	TF	FAR1
EVM0025647.1	TF	FAR1
EVM0026453.1	TF	FAR1
EVM0027656.1	TF	FAR1
add_RNAAddG005923.1	TF	FAR1
EVM0000366.1	TF	GARP-ARR-B
EVM0003041.1	TF	GARP-ARR-B
EVM0007065.1	TF	GARP-ARR-B
EVM0011500.1	TF	GARP-ARR-B
EVM0012756.3	TF	GARP-ARR-B
EVM0013449.1	TF	GARP-ARR-B
EVM0015281.3	TF	GARP-ARR-B
EVM0018416.1	TF	GARP-ARR-B
EVM0019288.1	TF	GARP-ARR-B
EVM0021457.1	TF	GARP-ARR-B
EVM0024261.1	TF	GARP-ARR-B
EVM0027805.1	TF	GARP-ARR-B
EVM0000210.1	TF	GARP-G2-like
EVM0000597.2	TF	GARP-G2-like
EVM0000797.1	TF	GARP-G2-like
EVM0001253.2	TF	GARP-G2-like
EVM0001437.1	TF	GARP-G2-like
EVM0002522.1	TF	GARP-G2-like
EVM0003521.1	TF	GARP-G2-like
EVM0003634.1	TF	GARP-G2-like
EVM0004317.1	TF	GARP-G2-like
EVM0005395.1	TF	GARP-G2-like
EVM0005441.1	TF	GARP-G2-like
EVM0005931.1	TF	GARP-G2-like
EVM0006414.1	TF	GARP-G2-like
EVM0006841.1	TF	GARP-G2-like
EVM0007462.1	TF	GARP-G2-like
EVM0008118.1	TF	GARP-G2-like
EVM0008387.4	TF	GARP-G2-like
EVM0008458.2	TF	GARP-G2-like
EVM0009824.1	TF	GARP-G2-like
EVM0010818.1	TF	GARP-G2-like
EVM0011369.1	TF	GARP-G2-like
EVM0011537.2	TF	GARP-G2-like
EVM0012401.1	TF	GARP-G2-like
EVM0012521.1	TF	GARP-G2-like
EVM0013563.2	TF	GARP-G2-like
EVM0014118.1	TF	GARP-G2-like
EVM0014223.1	TF	GARP-G2-like
EVM0015577.1	TF	GARP-G2-like
EVM0015765.1	TF	GARP-G2-like
EVM0016861.1	TF	GARP-G2-like
EVM0017119.1	TF	GARP-G2-like
EVM0017978.1	TF	GARP-G2-like
EVM0017981.1	TF	GARP-G2-like
EVM0019241.1	TF	GARP-G2-like
EVM0019381.1	TF	GARP-G2-like
EVM0020180.1	TF	GARP-G2-like
EVM0020446.1	TF	GARP-G2-like
EVM0020633.1	TF	GARP-G2-like
EVM0020754.1	TF	GARP-G2-like
EVM0020839.1	TF	GARP-G2-like
EVM0023525.1	TF	GARP-G2-like
EVM0024017.1	TF	GARP-G2-like
EVM0024499.1	TF	GARP-G2-like
EVM0025072.1	TF	GARP-G2-like
EVM0025243.1	TF	GARP-G2-like
EVM0025295.1	TF	GARP-G2-like
EVM0026292.1	TF	GARP-G2-like
EVM0026756.1	TF	GARP-G2-like
EVM0001087.1	TF	GeBP
EVM0002390.1	TF	GeBP
EVM0009753.1	TF	GeBP
EVM0015312.1	TF	GeBP
EVM0018805.1	TF	GeBP
EVM0023286.1	TF	GeBP
EVM0024701.1	TF	GeBP
EVM0027238.1	TF	GeBP
add_RNAAddG001188.1	TF	GeBP
add_RNAAddG001210.1	TF	GeBP
EVM0000957.1	TF	GRAS
EVM0002459.1	TF	GRAS
EVM0003038.1	TF	GRAS
EVM0003172.1	TF	GRAS
EVM0004557.2	TF	GRAS
EVM0004725.1	TF	GRAS
EVM0004809.1	TF	GRAS
EVM0005220.1	TF	GRAS
EVM0005239.1	TF	GRAS
EVM0005437.1	TF	GRAS
EVM0005883.1	TF	GRAS
EVM0006858.1	TF	GRAS
EVM0006977.1	TF	GRAS
EVM0007410.1	TF	GRAS
EVM0007529.1	TF	GRAS
EVM0007653.1	TF	GRAS
EVM0007685.1	TF	GRAS
EVM0008478.1	TF	GRAS
EVM0008842.1	TF	GRAS
EVM0008908.1	TF	GRAS
EVM0010461.1	TF	GRAS
EVM0010478.1	TF	GRAS
EVM0010994.1	TF	GRAS
EVM0011756.1	TF	GRAS
EVM0012221.1	TF	GRAS
EVM0012318.1	TF	GRAS
EVM0012808.1	TF	GRAS
EVM0013122.1	TF	GRAS
EVM0013836.1	TF	GRAS
EVM0013859.1	TF	GRAS
EVM0014019.1	TF	GRAS
EVM0014245.1	TF	GRAS
EVM0015102.1	TF	GRAS
EVM0016509.2	TF	GRAS
EVM0016610.1	TF	GRAS
EVM0017251.1	TF	GRAS
EVM0017628.1	TF	GRAS
EVM0018968.1	TF	GRAS
EVM0019238.1	TF	GRAS
EVM0019432.1	TF	GRAS
EVM0020156.1	TF	GRAS
EVM0020772.1	TF	GRAS
EVM0021193.1	TF	GRAS
EVM0021241.1	TF	GRAS
EVM0021489.1	TF	GRAS
EVM0021734.1	TF	GRAS
EVM0021832.1	TF	GRAS
EVM0022619.2	TF	GRAS
EVM0023000.1	TF	GRAS
EVM0023200.1	TF	GRAS
EVM0023667.1	TF	GRAS
EVM0023899.1	TF	GRAS
EVM0024073.1	TF	GRAS
EVM0024901.1	TF	GRAS
EVM0025030.1	TF	GRAS
EVM0025269.1	TF	GRAS
EVM0025362.1	TF	GRAS
EVM0025660.1	TF	GRAS
EVM0026787.1	TF	GRAS
EVM0027301.1	TF	GRAS
EVM0027833.1	TF	GRAS
EVM0028075.1	TF	GRAS
EVM0001439.2	TF	GRF
EVM0002359.1	TF	GRF
EVM0002896.1	TF	GRF
EVM0003567.1	TF	GRF
EVM0006628.1	TF	GRF
EVM0010381.1	TF	GRF
EVM0010558.2	TF	GRF
EVM0016450.1	TF	GRF
EVM0020070.2	TF	GRF
EVM0022134.6	TF	GRF
EVM0024518.1	TF	GRF
EVM0024898.1	TF	GRF
EVM0001549.2	TF	HB-BELL
EVM0001929.1	TF	HB-BELL
EVM0002099.1	TF	HB-BELL
EVM0008409.1	TF	HB-BELL
EVM0010352.1	TF	HB-BELL
EVM0010848.1	TF	HB-BELL
EVM0012142.1	TF	HB-BELL
EVM0013517.1	TF	HB-BELL
EVM0014155.1	TF	HB-BELL
EVM0015151.1	TF	HB-BELL
EVM0017791.1	TF	HB-BELL
EVM0018226.2	TF	HB-BELL
EVM0020140.2	TF	HB-BELL
EVM0026485.1	TF	HB-BELL
EVM0028036.1	TF	HB-BELL
EVM0001141.1	TF	HB-HD-ZIP
EVM0003932.1	TF	HB-HD-ZIP
EVM0004007.1	TF	HB-HD-ZIP
EVM0005163.1	TF	HB-HD-ZIP
EVM0005221.1	TF	HB-HD-ZIP
EVM0005926.1	TF	HB-HD-ZIP
EVM0006981.1	TF	HB-HD-ZIP
EVM0008850.1	TF	HB-HD-ZIP
EVM0009096.1	TF	HB-HD-ZIP
EVM0009143.1	TF	HB-HD-ZIP
EVM0010142.1	TF	HB-HD-ZIP
EVM0011227.1	TF	HB-HD-ZIP
EVM0011275.1	TF	HB-HD-ZIP
EVM0011427.1	TF	HB-HD-ZIP
EVM0013490.1	TF	HB-HD-ZIP
EVM0014105.1	TF	HB-HD-ZIP
EVM0014910.1	TF	HB-HD-ZIP
EVM0015193.1	TF	HB-HD-ZIP
EVM0015243.1	TF	HB-HD-ZIP
EVM0015450.1	TF	HB-HD-ZIP
EVM0015814.1	TF	HB-HD-ZIP
EVM0015884.1	TF	HB-HD-ZIP
EVM0015916.1	TF	HB-HD-ZIP
EVM0016419.1	TF	HB-HD-ZIP
EVM0018051.1	TF	HB-HD-ZIP
EVM0018385.1	TF	HB-HD-ZIP
EVM0018743.1	TF	HB-HD-ZIP
EVM0019113.1	TF	HB-HD-ZIP
EVM0020931.1	TF	HB-HD-ZIP
EVM0021089.1	TF	HB-HD-ZIP
EVM0021743.1	TF	HB-HD-ZIP
EVM0022700.1	TF	HB-HD-ZIP
EVM0022781.1	TF	HB-HD-ZIP
EVM0023477.1	TF	HB-HD-ZIP
EVM0023921.1	TF	HB-HD-ZIP
EVM0024046.1	TF	HB-HD-ZIP
EVM0024102.1	TF	HB-HD-ZIP
EVM0024869.1	TF	HB-HD-ZIP
EVM0025550.1	TF	HB-HD-ZIP
EVM0025639.2	TF	HB-HD-ZIP
EVM0026612.1	TF	HB-HD-ZIP
EVM0027033.1	TF	HB-HD-ZIP
EVM0028053.1	TF	HB-HD-ZIP
EVM0001419.1	TF	HB-KNOX
EVM0004808.1	TF	HB-KNOX
EVM0006933.1	TF	HB-KNOX
EVM0008230.1	TF	HB-KNOX
EVM0018491.3	TF	HB-KNOX
EVM0020876.1	TF	HB-KNOX
EVM0020951.1	TF	HB-KNOX
EVM0024337.1	TF	HB-KNOX
EVM0025530.1	TF	HB-KNOX
EVM0025544.1	TF	HB-KNOX
EVM0026582.1	TF	HB-KNOX
EVM0001400.1	TF	HB-other
EVM0006491.1	TF	HB-other
EVM0011796.1	TF	HB-other
EVM0012245.1	TF	HB-other
EVM0013470.1	TF	HB-other
EVM0014362.1	TF	HB-other
EVM0018453.1	TF	HB-other
EVM0021612.1	TF	HB-other
EVM0022894.1	TF	HB-other
EVM0025162.1	TF	HB-other
EVM0025232.1	TF	HB-other
EVM0027511.1	TF	HB-other
EVM0014190.1	TF	HB-PHD
EVM0024818.1	TF	HB-PHD
EVM0001584.1	TF	HB-WOX
EVM0004974.1	TF	HB-WOX
EVM0005769.1	TF	HB-WOX
EVM0007825.1	TF	HB-WOX
EVM0008340.1	TF	HB-WOX
EVM0008869.1	TF	HB-WOX
EVM0010499.1	TF	HB-WOX
EVM0016635.1	TF	HB-WOX
EVM0017149.1	TF	HB-WOX
EVM0017291.1	TF	HB-WOX
EVM0018729.1	TF	HB-WOX
EVM0022626.1	TF	HB-WOX
EVM0023748.1	TF	HB-WOX
EVM0023866.1	TF	HB-WOX
EVM0027543.1	TF	HB-WOX
EVM0010447.1	TF	HRT
EVM0000817.1	TF	HSF
EVM0001289.1	TF	HSF
EVM0002416.1	TF	HSF
EVM0002514.1	TF	HSF
EVM0003128.1	TF	HSF
EVM0003304.1	TF	HSF
EVM0004220.1	TF	HSF
EVM0004954.1	TF	HSF
EVM0006191.1	TF	HSF
EVM0006922.1	TF	HSF
EVM0007734.1	TF	HSF
EVM0007953.1	TF	HSF
EVM0010800.1	TF	HSF
EVM0012123.1	TF	HSF
EVM0012238.1	TF	HSF
EVM0012493.3	TF	HSF
EVM0012567.1	TF	HSF
EVM0013164.1	TF	HSF
EVM0013214.1	TF	HSF
EVM0013673.1	TF	HSF
EVM0014116.1	TF	HSF
EVM0014513.1	TF	HSF
EVM0014653.1	TF	HSF
EVM0017861.1	TF	HSF
EVM0018201.1	TF	HSF
EVM0018443.1	TF	HSF
EVM0020650.1	TF	HSF
EVM0020872.1	TF	HSF
EVM0021531.1	TF	HSF
EVM0022005.1	TF	HSF
EVM0022616.1	TF	HSF
EVM0024007.1	TF	HSF
EVM0027188.1	TF	HSF
EVM0028007.4	TF	HSF
EVM0011048.1	TF	LFY
EVM0003778.1	TF	LIM
EVM0004416.1	TF	LIM
EVM0006343.1	TF	LIM
EVM0007451.1	TF	LIM
EVM0010227.1	TF	LIM
EVM0010625.1	TF	LIM
EVM0012032.1	TF	LIM
EVM0026014.1	TF	LIM
EVM0026321.1	TF	LIM
EVM0027666.1	TF	LIM
EVM0001767.1	TF	LOB
EVM0002694.1	TF	LOB
EVM0003179.1	TF	LOB
EVM0003945.1	TF	LOB
EVM0004230.1	TF	LOB
EVM0005650.1	TF	LOB
EVM0006869.1	TF	LOB
EVM0007008.1	TF	LOB
EVM0007938.1	TF	LOB
EVM0008352.1	TF	LOB
EVM0009307.1	TF	LOB
EVM0009594.1	TF	LOB
EVM0010313.1	TF	LOB
EVM0010468.1	TF	LOB
EVM0010786.1	TF	LOB
EVM0012219.1	TF	LOB
EVM0013382.1	TF	LOB
EVM0014207.1	TF	LOB
EVM0014266.1	TF	LOB
EVM0014521.1	TF	LOB
EVM0014809.1	TF	LOB
EVM0014969.1	TF	LOB
EVM0015240.1	TF	LOB
EVM0016244.1	TF	LOB
EVM0016846.1	TF	LOB
EVM0016898.1	TF	LOB
EVM0017358.1	TF	LOB
EVM0017560.1	TF	LOB
EVM0017615.1	TF	LOB
EVM0018835.1	TF	LOB
EVM0019510.1	TF	LOB
EVM0021475.1	TF	LOB
EVM0021519.1	TF	LOB
EVM0022102.1	TF	LOB
EVM0022175.1	TF	LOB
EVM0022636.1	TF	LOB
EVM0022758.1	TF	LOB
EVM0023584.1	TF	LOB
EVM0024048.1	TF	LOB
EVM0024249.1	TF	LOB
EVM0025412.1	TF	LOB
EVM0025716.1	TF	LOB
EVM0026135.1	TF	LOB
EVM0026249.1	TF	LOB
EVM0027234.1	TF	LOB
EVM0027525.1	TF	LOB
EVM0027554.1	TF	LOB
EVM0027973.1	TF	LOB
add_RNAAddG002922.1	TF	LOB
add_RNAAddG009966.1	TF	LOB
EVM0000568.1	TF	MADS-MIKC
EVM0003112.1	TF	MADS-MIKC
EVM0003464.1	TF	MADS-MIKC
EVM0003754.2	TF	MADS-MIKC
EVM0003978.1	TF	MADS-MIKC
EVM0004603.1	TF	MADS-MIKC
EVM0005116.1	TF	MADS-MIKC
EVM0005202.1	TF	MADS-MIKC
EVM0005348.1	TF	MADS-MIKC
EVM0006941.1	TF	MADS-MIKC
EVM0007238.1	TF	MADS-MIKC
EVM0007545.1	TF	MADS-MIKC
EVM0007693.1	TF	MADS-MIKC
EVM0008621.1	TF	MADS-MIKC
EVM0008992.1	TF	MADS-MIKC
EVM0010756.1	TF	MADS-MIKC
EVM0010782.1	TF	MADS-MIKC
EVM0011078.1	TF	MADS-MIKC
EVM0011621.1	TF	MADS-MIKC
EVM0011931.1	TF	MADS-MIKC
EVM0014937.1	TF	MADS-MIKC
EVM0015324.2	TF	MADS-MIKC
EVM0015521.1	TF	MADS-MIKC
EVM0015862.1	TF	MADS-MIKC
EVM0015936.1	TF	MADS-MIKC
EVM0016211.1	TF	MADS-MIKC
EVM0016354.1	TF	MADS-MIKC
EVM0016888.1	TF	MADS-MIKC
EVM0018398.1	TF	MADS-MIKC
EVM0018581.2	TF	MADS-MIKC
EVM0018841.1	TF	MADS-MIKC
EVM0019346.1	TF	MADS-MIKC
EVM0020445.1	TF	MADS-MIKC
EVM0020701.1	TF	MADS-MIKC
EVM0021299.1	TF	MADS-MIKC
EVM0021493.1	TF	MADS-MIKC
EVM0021884.1	TF	MADS-MIKC
EVM0023692.1	TF	MADS-MIKC
EVM0025253.1	TF	MADS-MIKC
EVM0025684.2	TF	MADS-MIKC
EVM0026663.1	TF	MADS-MIKC
EVM0026727.1	TF	MADS-MIKC
EVM0027320.2	TF	MADS-MIKC
EVM0027373.1	TF	MADS-MIKC
EVM0027503.1	TF	MADS-MIKC
EVM0027956.1	TF	MADS-MIKC
EVM0002358.1	TF	MADS-M-type
EVM0003219.1	TF	MADS-M-type
EVM0006258.1	TF	MADS-M-type
EVM0008066.1	TF	MADS-M-type
EVM0008838.1	TF	MADS-M-type
EVM0009157.1	TF	MADS-M-type
EVM0009194.1	TF	MADS-M-type
EVM0009463.1	TF	MADS-M-type
EVM0010397.1	TF	MADS-M-type
EVM0010767.1	TF	MADS-M-type
EVM0012806.1	TF	MADS-M-type
EVM0013284.1	TF	MADS-M-type
EVM0013287.1	TF	MADS-M-type
EVM0014039.1	TF	MADS-M-type
EVM0014388.1	TF	MADS-M-type
EVM0014621.1	TF	MADS-M-type
EVM0015686.1	TF	MADS-M-type
EVM0015910.1	TF	MADS-M-type
EVM0017084.1	TF	MADS-M-type
EVM0020243.1	TF	MADS-M-type
EVM0020401.1	TF	MADS-M-type
EVM0020938.1	TF	MADS-M-type
EVM0022351.1	TF	MADS-M-type
EVM0024993.1	TF	MADS-M-type
EVM0027502.1	TF	MADS-M-type
EVM0000081.1	TF	MYB
EVM0000161.1	TF	MYB
EVM0000315.1	TF	MYB
EVM0000346.1	TF	MYB
EVM0000487.1	TF	MYB
EVM0000615.1	TF	MYB
EVM0000634.1	TF	MYB
EVM0000886.1	TF	MYB
EVM0001002.1	TF	MYB
EVM0001013.1	TF	MYB
EVM0001180.1	TF	MYB
EVM0001451.1	TF	MYB
EVM0001634.1	TF	MYB
EVM0001676.1	TF	MYB
EVM0002071.1	TF	MYB
EVM0002223.6	TF	MYB
EVM0002297.1	TF	MYB
EVM0002548.1	TF	MYB
EVM0003863.1	TF	MYB
EVM0003949.1	TF	MYB
EVM0003995.1	TF	MYB
EVM0004039.1	TF	MYB
EVM0004159.1	TF	MYB
EVM0004378.1	TF	MYB
EVM0004385.1	TF	MYB
EVM0004436.1	TF	MYB
EVM0004441.1	TF	MYB
EVM0004520.1	TF	MYB
EVM0004701.1	TF	MYB
EVM0004788.1	TF	MYB
EVM0004831.1	TF	MYB
EVM0004978.1	TF	MYB
EVM0005284.1	TF	MYB
EVM0005854.1	TF	MYB
EVM0005889.1	TF	MYB
EVM0006087.1	TF	MYB
EVM0006091.1	TF	MYB
EVM0006123.1	TF	MYB
EVM0006196.1	TF	MYB
EVM0006692.1	TF	MYB
EVM0006797.1	TF	MYB
EVM0006815.1	TF	MYB
EVM0007067.1	TF	MYB
EVM0007702.1	TF	MYB
EVM0007777.1	TF	MYB
EVM0007898.1	TF	MYB
EVM0007935.1	TF	MYB
EVM0007987.1	TF	MYB
EVM0008242.1	TF	MYB
EVM0008354.1	TF	MYB
EVM0008428.1	TF	MYB
EVM0008636.1	TF	MYB
EVM0008722.1	TF	MYB
EVM0008750.1	TF	MYB
EVM0008917.1	TF	MYB
EVM0008962.1	TF	MYB
EVM0008997.1	TF	MYB
EVM0009047.1	TF	MYB
EVM0009438.1	TF	MYB
EVM0009565.1	TF	MYB
EVM0009725.1	TF	MYB
EVM0009828.1	TF	MYB
EVM0009928.1	TF	MYB
EVM0009985.1	TF	MYB
EVM0010401.1	TF	MYB
EVM0010567.1	TF	MYB
EVM0010842.1	TF	MYB
EVM0011241.1	TF	MYB
EVM0011841.1	TF	MYB
EVM0012033.1	TF	MYB
EVM0012177.1	TF	MYB
EVM0012446.1	TF	MYB
EVM0012694.1	TF	MYB
EVM0012769.1	TF	MYB
EVM0013232.1	TF	MYB
EVM0013374.1	TF	MYB
EVM0013549.1	TF	MYB
EVM0013621.1	TF	MYB
EVM0014147.1	TF	MYB
EVM0014408.1	TF	MYB
EVM0014461.1	TF	MYB
EVM0014571.1	TF	MYB
EVM0014606.1	TF	MYB
EVM0015014.1	TF	MYB
EVM0015065.1	TF	MYB
EVM0015077.1	TF	MYB
EVM0015430.1	TF	MYB
EVM0015722.1	TF	MYB
EVM0015750.1	TF	MYB
EVM0016063.1	TF	MYB
EVM0016376.1	TF	MYB
EVM0016452.1	TF	MYB
EVM0016470.1	TF	MYB
EVM0016488.1	TF	MYB
EVM0016723.1	TF	MYB
EVM0016750.1	TF	MYB
EVM0016827.1	TF	MYB
EVM0016840.2	TF	MYB
EVM0016948.1	TF	MYB
EVM0017077.1	TF	MYB
EVM0017601.2	TF	MYB
EVM0017633.1	TF	MYB
EVM0017777.1	TF	MYB
EVM0018061.1	TF	MYB
EVM0018121.1	TF	MYB
EVM0018169.1	TF	MYB
EVM0018188.1	TF	MYB
EVM0018479.1	TF	MYB
EVM0018941.1	TF	MYB
EVM0019150.1	TF	MYB
EVM0019168.1	TF	MYB
EVM0019411.1	TF	MYB
EVM0019549.1	TF	MYB
EVM0020492.1	TF	MYB
EVM0020612.1	TF	MYB
EVM0021035.1	TF	MYB
EVM0021665.1	TF	MYB
EVM0021682.1	TF	MYB
EVM0021686.1	TF	MYB
EVM0021875.1	TF	MYB
EVM0021928.1	TF	MYB
EVM0022143.1	TF	MYB
EVM0022482.1	TF	MYB
EVM0022526.2	TF	MYB
EVM0022696.1	TF	MYB
EVM0022973.1	TF	MYB
EVM0023058.1	TF	MYB
EVM0023152.1	TF	MYB
EVM0023228.1	TF	MYB
EVM0023844.1	TF	MYB
EVM0023930.1	TF	MYB
EVM0024380.1	TF	MYB
EVM0024401.1	TF	MYB
EVM0024689.1	TF	MYB
EVM0025280.1	TF	MYB
EVM0025552.1	TF	MYB
EVM0025587.1	TF	MYB
EVM0025775.1	TF	MYB
EVM0025852.1	TF	MYB
EVM0026068.1	TF	MYB
EVM0026469.1	TF	MYB
EVM0026541.1	TF	MYB
EVM0027175.2	TF	MYB
EVM0027561.4	TF	MYB
EVM0027789.1	TF	MYB
EVM0000508.1	TF	MYB-related
EVM0000559.1	TF	MYB-related
EVM0000577.1	TF	MYB-related
EVM0001359.1	TF	MYB-related
EVM0001393.1	TF	MYB-related
EVM0001574.1	TF	MYB-related
EVM0002308.1	TF	MYB-related
EVM0002897.1	TF	MYB-related
EVM0002964.1	TF	MYB-related
EVM0003465.2	TF	MYB-related
EVM0003749.1	TF	MYB-related
EVM0003815.1	TF	MYB-related
EVM0004337.3	TF	MYB-related
EVM0004486.1	TF	MYB-related
EVM0004948.1	TF	MYB-related
EVM0005396.1	TF	MYB-related
EVM0007430.1	TF	MYB-related
EVM0007535.1	TF	MYB-related
EVM0007983.1	TF	MYB-related
EVM0008426.1	TF	MYB-related
EVM0008650.1	TF	MYB-related
EVM0008888.2	TF	MYB-related
EVM0009542.1	TF	MYB-related
EVM0009763.1	TF	MYB-related
EVM0010097.1	TF	MYB-related
EVM0010306.2	TF	MYB-related
EVM0012269.1	TF	MYB-related
EVM0012395.1	TF	MYB-related
EVM0012408.1	TF	MYB-related
EVM0012449.1	TF	MYB-related
EVM0012499.2	TF	MYB-related
EVM0013600.1	TF	MYB-related
EVM0014333.2	TF	MYB-related
EVM0014440.1	TF	MYB-related
EVM0014726.1	TF	MYB-related
EVM0015407.1	TF	MYB-related
EVM0015496.1	TF	MYB-related
EVM0016013.1	TF	MYB-related
EVM0016226.1	TF	MYB-related
EVM0016495.2	TF	MYB-related
EVM0016651.1	TF	MYB-related
EVM0016944.1	TF	MYB-related
EVM0017322.1	TF	MYB-related
EVM0017455.1	TF	MYB-related
EVM0018501.1	TF	MYB-related
EVM0019384.1	TF	MYB-related
EVM0019451.1	TF	MYB-related
EVM0019775.1	TF	MYB-related
EVM0020710.1	TF	MYB-related
EVM0021539.1	TF	MYB-related
EVM0021595.1	TF	MYB-related
EVM0022816.1	TF	MYB-related
EVM0023289.1	TF	MYB-related
EVM0023927.4	TF	MYB-related
EVM0025053.1	TF	MYB-related
EVM0025974.1	TF	MYB-related
EVM0026214.1	TF	MYB-related
EVM0026387.2	TF	MYB-related
EVM0026529.1	TF	MYB-related
EVM0026651.1	TF	MYB-related
EVM0027190.2	TF	MYB-related
EVM0027253.1	TF	MYB-related
EVM0027735.1	TF	MYB-related
EVM0027884.1	TF	MYB-related
EVM0027961.1	TF	MYB-related
EVM0000014.1	TF	NAC
EVM0000553.1	TF	NAC
EVM0000946.1	TF	NAC
EVM0001254.1	TF	NAC
EVM0001825.1	TF	NAC
EVM0001826.1	TF	NAC
EVM0002275.1	TF	NAC
EVM0002346.1	TF	NAC
EVM0002598.1	TF	NAC
EVM0002612.1	TF	NAC
EVM0002774.1	TF	NAC
EVM0003692.2	TF	NAC
EVM0004898.1	TF	NAC
EVM0005048.1	TF	NAC
EVM0005269.1	TF	NAC
EVM0006891.1	TF	NAC
EVM0007240.1	TF	NAC
EVM0007342.1	TF	NAC
EVM0007446.1	TF	NAC
EVM0007949.1	TF	NAC
EVM0008601.1	TF	NAC
EVM0009029.1	TF	NAC
EVM0010196.1	TF	NAC
EVM0010890.1	TF	NAC
EVM0011250.1	TF	NAC
EVM0011295.1	TF	NAC
EVM0011989.1	TF	NAC
EVM0012415.1	TF	NAC
EVM0012594.1	TF	NAC
EVM0013110.1	TF	NAC
EVM0013308.1	TF	NAC
EVM0013738.1	TF	NAC
EVM0013784.1	TF	NAC
EVM0014317.3	TF	NAC
EVM0014582.1	TF	NAC
EVM0014742.1	TF	NAC
EVM0014951.1	TF	NAC
EVM0015253.1	TF	NAC
EVM0015811.1	TF	NAC
EVM0016132.1	TF	NAC
EVM0016762.1	TF	NAC
EVM0017168.1	TF	NAC
EVM0017178.1	TF	NAC
EVM0017275.1	TF	NAC
EVM0017545.1	TF	NAC
EVM0017672.1	TF	NAC
EVM0018134.1	TF	NAC
EVM0018804.1	TF	NAC
EVM0019152.1	TF	NAC
EVM0019301.1	TF	NAC
EVM0019406.1	TF	NAC
EVM0019979.1	TF	NAC
EVM0020291.1	TF	NAC
EVM0020339.1	TF	NAC
EVM0020736.2	TF	NAC
EVM0020746.1	TF	NAC
EVM0020848.1	TF	NAC
EVM0020924.1	TF	NAC
EVM0021031.1	TF	NAC
EVM0021188.1	TF	NAC
EVM0021282.1	TF	NAC
EVM0021410.1	TF	NAC
EVM0021481.1	TF	NAC
EVM0021657.1	TF	NAC
EVM0021731.1	TF	NAC
EVM0021962.1	TF	NAC
EVM0021981.1	TF	NAC
EVM0022633.1	TF	NAC
EVM0022741.1	TF	NAC
EVM0023726.1	TF	NAC
EVM0023821.1	TF	NAC
EVM0024451.1	TF	NAC
EVM0024696.1	TF	NAC
EVM0025216.1	TF	NAC
EVM0025354.1	TF	NAC
EVM0025395.1	TF	NAC
EVM0025749.1	TF	NAC
EVM0025950.1	TF	NAC
EVM0025955.1	TF	NAC
EVM0026433.2	TF	NAC
EVM0026994.1	TF	NAC
EVM0027150.1	TF	NAC
EVM0027814.1	TF	NAC
EVM0027895.1	TF	NAC
EVM0011996.1	TF	NF-X1
EVM0012776.1	TF	NF-X1
EVM0016144.1	TF	NF-X1
EVM0003354.2	TF	NF-YA
EVM0013226.1	TF	NF-YA
EVM0013993.5	TF	NF-YA
EVM0017097.1	TF	NF-YA
EVM0019293.1	TF	NF-YA
EVM0024182.4	TF	NF-YA
EVM0024586.1	TF	NF-YA
EVM0025733.1	TF	NF-YA
EVM0000175.1	TF	NF-YB
EVM0001269.1	TF	NF-YB
EVM0001915.1	TF	NF-YB
EVM0002169.1	TF	NF-YB
EVM0003473.1	TF	NF-YB
EVM0004879.1	TF	NF-YB
EVM0007595.1	TF	NF-YB
EVM0008317.1	TF	NF-YB
EVM0010823.1	TF	NF-YB
EVM0011073.1	TF	NF-YB
EVM0012046.1	TF	NF-YB
EVM0012664.1	TF	NF-YB
EVM0012929.1	TF	NF-YB
EVM0015445.1	TF	NF-YB
EVM0016159.1	TF	NF-YB
EVM0018624.1	TF	NF-YB
EVM0019297.1	TF	NF-YB
EVM0022528.1	TF	NF-YB
EVM0026682.1	TF	NF-YB
add_RNAAddG004848.1	TF	NF-YB
add_RNAAddG007549.1	TF	NF-YB
EVM0003335.1	TF	NF-YC
EVM0005002.1	TF	NF-YC
EVM0007204.1	TF	NF-YC
EVM0007499.1	TF	NF-YC
EVM0010082.2	TF	NF-YC
EVM0016876.1	TF	NF-YC
EVM0021782.2	TF	NF-YC
EVM0022473.1	TF	NF-YC
EVM0026708.1	TF	NF-YC
EVM0000440.1	TF	OFP
EVM0001102.1	TF	OFP
EVM0001266.1	TF	OFP
EVM0003379.1	TF	OFP
EVM0004745.1	TF	OFP
EVM0005851.1	TF	OFP
EVM0006170.1	TF	OFP
EVM0007800.1	TF	OFP
EVM0008972.1	TF	OFP
EVM0009248.1	TF	OFP
EVM0011426.1	TF	OFP
EVM0012149.1	TF	OFP
EVM0013492.1	TF	OFP
EVM0014500.1	TF	OFP
EVM0014963.1	TF	OFP
EVM0015348.1	TF	OFP
EVM0015517.1	TF	OFP
EVM0016426.1	TF	OFP
EVM0016838.1	TF	OFP
EVM0023169.1	TF	OFP
EVM0024243.1	TF	OFP
EVM0024941.1	TF	OFP
EVM0026946.1	TF	OFP
EVM0027227.1	TF	OFP
EVM0027649.1	TF	OFP
EVM0005147.1	TF	PLATZ
EVM0005519.1	TF	PLATZ
EVM0006323.1	TF	PLATZ
EVM0006910.1	TF	PLATZ
EVM0012312.1	TF	PLATZ
EVM0014475.1	TF	PLATZ
EVM0015341.1	TF	PLATZ
EVM0017774.1	TF	PLATZ
EVM0020537.1	TF	PLATZ
EVM0021154.1	TF	PLATZ
EVM0021203.1	TF	PLATZ
EVM0023358.1	TF	PLATZ
EVM0006607.1	TF	RWP-RK
EVM0006744.2	TF	RWP-RK
EVM0009564.1	TF	RWP-RK
EVM0011266.1	TF	RWP-RK
EVM0014044.2	TF	RWP-RK
EVM0014636.1	TF	RWP-RK
EVM0014932.1	TF	RWP-RK
EVM0015651.1	TF	RWP-RK
EVM0016148.1	TF	RWP-RK
EVM0016820.1	TF	RWP-RK
EVM0017312.6	TF	RWP-RK
EVM0018852.1	TF	RWP-RK
EVM0020069.1	TF	RWP-RK
EVM0023013.1	TF	RWP-RK
EVM0023031.1	TF	RWP-RK
EVM0023640.1	TF	RWP-RK
EVM0024442.1	TF	RWP-RK
EVM0010986.1	TF	S1Fa-like
EVM0024695.1	TF	S1Fa-like
EVM0019525.1	TF	SAP
EVM0025777.1	TF	SAP
EVM0000786.1	TF	SBP
EVM0000973.1	TF	SBP
EVM0002915.1	TF	SBP
EVM0004829.1	TF	SBP
EVM0005465.2	TF	SBP
EVM0006254.1	TF	SBP
EVM0008007.1	TF	SBP
EVM0009114.1	TF	SBP
EVM0009976.1	TF	SBP
EVM0013421.1	TF	SBP
EVM0014752.1	TF	SBP
EVM0021251.1	TF	SBP
EVM0021760.3	TF	SBP
EVM0023258.1	TF	SBP
EVM0023407.1	TF	SBP
EVM0024955.1	TF	SBP
EVM0025398.4	TF	SBP
EVM0001674.1	TF	SRS
EVM0002235.2	TF	SRS
EVM0003683.1	TF	SRS
EVM0009368.1	TF	SRS
EVM0016363.1	TF	SRS
EVM0020175.1	TF	SRS
EVM0020228.1	TF	SRS
EVM0020400.1	TF	SRS
EVM0022198.1	TF	SRS
EVM0006572.2	TF	STAT
EVM0000297.1	TF	TCP
EVM0001299.1	TF	TCP
EVM0002135.1	TF	TCP
EVM0003237.1	TF	TCP
EVM0004844.1	TF	TCP
EVM0005564.1	TF	TCP
EVM0005992.1	TF	TCP
EVM0006115.1	TF	TCP
EVM0006308.1	TF	TCP
EVM0009371.2	TF	TCP
EVM0010011.1	TF	TCP
EVM0011454.1	TF	TCP
EVM0011941.1	TF	TCP
EVM0013012.1	TF	TCP
EVM0013606.1	TF	TCP
EVM0013814.1	TF	TCP
EVM0014002.1	TF	TCP
EVM0014083.3	TF	TCP
EVM0015125.1	TF	TCP
EVM0016387.1	TF	TCP
EVM0016657.1	TF	TCP
EVM0016693.1	TF	TCP
EVM0018155.1	TF	TCP
EVM0019539.1	TF	TCP
EVM0020427.1	TF	TCP
EVM0020793.1	TF	TCP
EVM0024849.1	TF	TCP
EVM0027104.1	TF	TCP
EVM0027400.1	TF	TCP
EVM0004616.1	TF	Tify
EVM0005030.2	TF	Tify
EVM0006250.1	TF	Tify
EVM0006652.1	TF	Tify
EVM0007128.2	TF	Tify
EVM0009654.1	TF	Tify
EVM0009844.3	TF	Tify
EVM0012571.1	TF	Tify
EVM0014133.1	TF	Tify
EVM0015844.2	TF	Tify
EVM0016366.2	TF	Tify
EVM0000211.1	TF	Trihelix
EVM0002072.1	TF	Trihelix
EVM0004038.1	TF	Trihelix
EVM0005456.1	TF	Trihelix
EVM0006260.1	TF	Trihelix
EVM0006353.1	TF	Trihelix
EVM0010062.1	TF	Trihelix
EVM0010452.1	TF	Trihelix
EVM0010626.1	TF	Trihelix
EVM0010745.1	TF	Trihelix
EVM0012912.1	TF	Trihelix
EVM0013376.1	TF	Trihelix
EVM0013938.1	TF	Trihelix
EVM0014314.2	TF	Trihelix
EVM0014633.1	TF	Trihelix
EVM0015019.1	TF	Trihelix
EVM0015033.1	TF	Trihelix
EVM0015283.1	TF	Trihelix
EVM0015575.1	TF	Trihelix
EVM0016766.1	TF	Trihelix
EVM0016983.1	TF	Trihelix
EVM0017778.1	TF	Trihelix
EVM0018160.1	TF	Trihelix
EVM0020317.1	TF	Trihelix
EVM0020698.1	TF	Trihelix
EVM0021044.1	TF	Trihelix
EVM0021868.1	TF	Trihelix
EVM0022443.1	TF	Trihelix
EVM0023331.1	TF	Trihelix
EVM0026495.1	TF	Trihelix
EVM0027071.1	TF	Trihelix
EVM0001290.1	TF	TUB
EVM0008885.1	TF	TUB
EVM0010922.1	TF	TUB
EVM0017163.1	TF	TUB
EVM0021367.1	TF	TUB
EVM0021988.2	TF	TUB
EVM0022007.1	TF	TUB
EVM0022125.1	TF	TUB
EVM0023509.1	TF	TUB
EVM0024496.1	TF	TUB
EVM0025124.1	TF	TUB
EVM0025464.1	TF	TUB
EVM0024708.1	TF	ULT
EVM0004375.6	TF	VOZ
EVM0005404.1	TF	VOZ
EVM0013048.1	TF	Whirly
EVM0017014.1	TF	Whirly
EVM0000301.1	TF	WRKY
EVM0000846.1	TF	WRKY
EVM0000935.1	TF	WRKY
EVM0001423.1	TF	WRKY
EVM0002175.1	TF	WRKY
EVM0002450.1	TF	WRKY
EVM0002704.1	TF	WRKY
EVM0003577.1	TF	WRKY
EVM0004030.1	TF	WRKY
EVM0004186.1	TF	WRKY
EVM0004707.1	TF	WRKY
EVM0004979.1	TF	WRKY
EVM0005267.1	TF	WRKY
EVM0005923.1	TF	WRKY
EVM0006542.1	TF	WRKY
EVM0006560.1	TF	WRKY
EVM0006901.1	TF	WRKY
EVM0007336.2	TF	WRKY
EVM0007532.1	TF	WRKY
EVM0007640.1	TF	WRKY
EVM0008277.1	TF	WRKY
EVM0008646.1	TF	WRKY
EVM0008893.1	TF	WRKY
EVM0008943.1	TF	WRKY
EVM0009221.1	TF	WRKY
EVM0009260.1	TF	WRKY
EVM0009288.1	TF	WRKY
EVM0009342.1	TF	WRKY
EVM0009680.1	TF	WRKY
EVM0009818.1	TF	WRKY
EVM0009829.1	TF	WRKY
EVM0009843.1	TF	WRKY
EVM0009848.1	TF	WRKY
EVM0010757.1	TF	WRKY
EVM0010833.3	TF	WRKY
EVM0011301.1	TF	WRKY
EVM0011344.1	TF	WRKY
EVM0011401.1	TF	WRKY
EVM0011638.1	TF	WRKY
EVM0011698.2	TF	WRKY
EVM0011894.1	TF	WRKY
EVM0012116.1	TF	WRKY
EVM0013631.1	TF	WRKY
EVM0014685.1	TF	WRKY
EVM0014897.1	TF	WRKY
EVM0015236.1	TF	WRKY
EVM0015631.1	TF	WRKY
EVM0015752.1	TF	WRKY
EVM0015817.1	TF	WRKY
EVM0016094.1	TF	WRKY
EVM0017026.2	TF	WRKY
EVM0017473.1	TF	WRKY
EVM0017788.1	TF	WRKY
EVM0017923.1	TF	WRKY
EVM0019903.1	TF	WRKY
EVM0020894.1	TF	WRKY
EVM0021033.1	TF	WRKY
EVM0021082.1	TF	WRKY
EVM0021373.2	TF	WRKY
EVM0021860.1	TF	WRKY
EVM0022041.1	TF	WRKY
EVM0022122.1	TF	WRKY
EVM0022240.1	TF	WRKY
EVM0022360.1	TF	WRKY
EVM0022958.2	TF	WRKY
EVM0023326.1	TF	WRKY
EVM0023863.1	TF	WRKY
EVM0024393.1	TF	WRKY
EVM0024475.1	TF	WRKY
EVM0024966.1	TF	WRKY
EVM0026231.1	TF	WRKY
EVM0026893.1	TF	WRKY
EVM0027094.1	TF	WRKY
EVM0027097.1	TF	WRKY
EVM0027191.1	TF	WRKY
EVM0027224.1	TF	WRKY
EVM0027286.1	TF	WRKY
EVM0028055.1	TF	WRKY
EVM0000578.1	TF	zf-HD
EVM0000819.1	TF	zf-HD
EVM0001969.1	TF	zf-HD
EVM0003157.1	TF	zf-HD
EVM0005949.1	TF	zf-HD
EVM0007903.1	TF	zf-HD
EVM0012197.1	TF	zf-HD
EVM0015154.1	TF	zf-HD
EVM0015287.1	TF	zf-HD
EVM0015830.1	TF	zf-HD
EVM0016674.1	TF	zf-HD
EVM0018312.1	TF	zf-HD
EVM0019585.1	TF	zf-HD
EVM0019959.1	TF	zf-HD
EVM0021727.1	TF	zf-HD
EVM0023078.1	TF	zf-HD
