# Supplementary material for: Genome-wide identification and co-expression network analysis of Aux/IAA gene family in Salvia miltiorrhiza
Source: PeerJ. 2023 Apr 17;11:e15212. doi: 10.7717/peerj.15212 (PMC10117383; doi:10.7717/peerj.15212)
Supplement: Supplemental Information 7 [file peerj-11-15212-s007.xlsx]

## Sheet: Sheet1
Group	Gene	R	P	KME
blue	EVM0009763	0.91078	9.86663e-09	0.91078
blue	EVM0014726	0.934233	5.97511e-10	0.934233
blue	EVM0001715	0.867657	3.51096e-07	0.867657
blue	EVM0012446	0.897954	3.35767e-08	0.897954
blue	EVM0019803	0.852452	9.27161e-07	0.852452
blue	EVM0013607	0.916276	5.51316e-09	0.916276
blue	EVM0008869	0.932347	7.75764e-10	0.932347
blue	EVM0016419	0.906816	1.46776e-08	0.906816
blue	EVM0027983	0.930423	1.00498e-09	0.930423
blue	EVM0004557	0.938085	3.41933e-10	0.938085
blue	EVM0002522	0.883047	1.15477e-07	0.883047
blue	EVM0000817	0.917999	4.55562e-09	0.917999
blue	EVM0013982	0.894977	4.35989e-08	0.894977
blue	EVM0016128	0.861033	5.43488e-07	0.861033
blue	EVM0018416	0.922388	2.74917e-09	0.922388
blue	EVM0001180	0.89217	5.53838e-08	0.89217
blue	EVM0012245	0.850603	1.03571e-06	0.850603
blue	EVM0028075	0.862564	4.92264e-07	0.862564
blue	EVM0024475	0.912783	8.01605e-09	0.912783
blue	EVM0021154	0.894286	4.62738e-08	0.894286
blue	EVM0018134	0.928521	1.28857e-09	0.928521
blue	EVM0004829	0.899855	2.82984e-08	0.899855
blue	EVM0016426	0.934528	5.73157e-10	0.934528
blue	EVM0016470	0.934207	5.99693e-10	0.934207
blue	EVM0011684	0.888854	7.28695e-08	0.888854
blue	EVM0021782	0.915111	6.25698e-09	0.915111
blue	EVM0020156	0.894934	4.37589e-08	0.894934
blue	EVM0008354	-0.852786	9.08632e-07	-0.852786
blue	EVM0014582	0.912429	8.31893e-09	0.912429
blue	EVM0006170	0.910161	1.05108e-08	0.910161
blue	EVM0019524	0.941076	2.16174e-10	0.941076
blue	EVM0026214	0.973224	1.36538e-13	0.973224
brown	EVM0026418	0.963115	2.75207e-12	0.963115
brown	EVM0021251	0.878199	1.66542e-07	0.878199
brown	EVM0004378	0.978928	1.43385e-14	0.978928
brown	EVM0006343	0.971474	2.47465e-13	0.971474
brown	EVM0016244	0.97905	1.35781e-14	0.97905
brown	EVM0008240	0.989938	1.33426e-17	0.989938
brown	EVM0015936	0.932834	7.25703e-10	0.932834
brown	EVM0004230	0.971581	2.38883e-13	0.971581
brown	EVM0024243	0.922228	2.80162e-09	0.922228
brown	EVM0011178	0.983086	1.8052e-15	0.983086
brown	EVM0001359	0.942489	1.72601e-10	0.942489
brown	EVM0019348	0.961385	4.22479e-12	0.961385
brown	EVM0013382	0.920178	3.55799e-09	0.920178
brown	EVM0018356	0.93826	3.33106e-10	0.93826
brown	add_RNAAddG006869	0.924263	2.19555e-09	0.924263
brown	EVM0001266	0.91206	8.64472e-09	0.91206
brown	EVM0005992	-0.861737	5.19383e-07	-0.861737
brown	EVM0002071	0.943387	1.49171e-10	0.943387
brown	EVM0021035	0.913109	7.74563e-09	0.913109
brown	EVM0000846	0.916171	5.57669e-09	0.916171
brown	EVM0023031	0.9693	4.92984e-13	0.9693
brown	EVM0003778	0.919871	3.68563e-09	0.919871
brown	EVM0009463	0.980939	5.5732e-15	0.980939
brown	EVM0024896	0.916421	5.42601e-09	0.916421
brown	EVM0014538	0.945796	9.96242e-11	0.945796
brown	EVM0020467	0.888739	7.35558e-08	0.888739
brown	EVM0024577	0.889107	7.13806e-08	0.889107
brown	EVM0026014	0.992231	1.15372e-18	0.992231
brown	EVM0004416	0.910626	1.00233e-08	0.910626
brown	EVM0027656	0.953509	2.38921e-11	0.953509
brown	EVM0022816	0.963321	2.6113e-12	0.963321
brown	EVM0012219	0.959996	5.87889e-12	0.959996
brown	EVM0002297	0.966367	1.15975e-12	0.966367
brown	EVM0003728	0.95598	1.43584e-11	0.95598
brown	EVM0025385	0.947828	6.98529e-11	0.947828
brown	EVM0007451	0.972509	1.7488e-13	0.972509
brown	EVM0006628	0.948818	5.84564e-11	0.948818
brown	EVM0010150	0.923511	2.40426e-09	0.923511
brown	EVM0006308	0.850338	1.05218e-06	0.850338
brown	EVM0009410	0.912669	8.11269e-09	0.912669
brown	EVM0025124	0.950444	4.32935e-11	0.950444
brown	EVM0021700	0.883748	1.0937e-07	0.883748
brown	EVM0022230	-0.865352	4.09811e-07	-0.865352
brown	EVM0011266	0.92917	1.18472e-09	0.92917
brown	EVM0007322	0.929766	1.09591e-09	0.929766
brown	EVM0007430	0.865738	3.99415e-07	0.865738
brown	EVM0008066	0.975982	4.91473e-14	0.975982
brown	EVM0012032	0.966872	1.00638e-12	0.966872
brown	EVM0025552	0.958146	8.96663e-12	0.958146
brown	EVM0023331	0.893525	4.93833e-08	0.893525
brown	EVM0018039	0.942301	1.77902e-10	0.942301
brown	EVM0019525	0.94136	2.06691e-10	0.94136
brown	EVM0018155	0.905148	1.72551e-08	0.905148
brown	EVM0021519	0.941686	1.96274e-10	0.941686
brown	EVM0006115	0.929946	1.0703e-09	0.929946
brown	EVM0022050	0.916446	5.41135e-09	0.916446
brown	EVM0010823	0.959943	5.95121e-12	0.959943
black	EVM0007532	0.993106	3.72145e-19	0.993106
black	EVM0000041	0.992879	5.05693e-19	0.992879
cyan	EVM0017797	0.990552	7.35318e-18	0.990552
black	EVM0019585	0.986507	2.13773e-16	0.986507
black	EVM0012769	0.98567	3.77525e-16	0.98567
black	EVM0010344	0.985149	5.28985e-16	0.985149
black	EVM0018729	0.984025	1.05332e-15	0.984025
black	EVM0021887	0.980011	8.72221e-15	0.980011
black	EVM0023258	0.979727	9.96179e-15	0.979727
black	EVM0015830	0.97912	1.31567e-14	0.97912
cyan	EVM0019866	0.976322	4.29739e-14	0.976322
cyan	EVM0001762	0.974378	9.02556e-14	0.974378
black	EVM0011877	0.973703	1.15241e-13	0.973703
black	EVM0024496	0.973164	1.39449e-13	0.973164
cyan	EVM0004701	0.973055	1.44862e-13	0.973055
black	EVM0017196	0.970028	3.93557e-13	0.970028
black	EVM0025416	0.969934	4.05402e-13	0.969934
cyan	EVM0002416	0.969713	4.3413e-13	0.969713
black	EVM0015209	0.968062	7.14351e-13	0.968062
black	EVM0003315	0.966774	1.03462e-12	0.966774
black	EVM0019903	0.966598	1.08718e-12	0.966598
black	EVM0021111	0.966593	1.08866e-12	0.966593
cyan	EVM0011962	0.966167	1.22589e-12	0.966167
black	EVM0015814	0.965722	1.38562e-12	0.965722
cyan	EVM0004337	0.964532	1.90718e-12	0.964532
black	EVM0017861	0.963284	2.6359e-12	0.963284
black	EVM0000371	0.962361	3.32508e-12	0.962361
black	EVM0018373	0.961348	4.26237e-12	0.961348
cyan	EVM0016656	0.960664	5.02283e-12	0.960664
cyan	EVM0025053	0.95841	8.45284e-12	0.95841
cyan	EVM0000238	0.958263	8.7349e-12	0.958263
cyan	EVM0005002	0.957422	1.05226e-11	0.957422
cyan	EVM0001024	0.956551	1.27108e-11	0.956551
cyan	EVM0024380	0.955783	1.49694e-11	0.955783
black	EVM0003092	0.954954	1.77998e-11	0.954954
cyan	EVM0011841	0.954578	1.92329e-11	0.954578
black	EVM0010401	0.954529	1.94295e-11	0.954529
black	EVM0027421	0.953849	2.23122e-11	0.953849
cyan	EVM0003464	0.953691	2.30321e-11	0.953691
cyan	EVM0007545	0.953481	2.40272e-11	0.953481
black	EVM0009746	0.952437	2.95458e-11	0.952437
black	EVM0009985	0.951423	3.59522e-11	0.951423
cyan	EVM0024073	0.950654	4.16139e-11	0.950654
black	EVM0003945	0.950523	4.26554e-11	0.950523
cyan	EVM0027884	0.949905	4.78813e-11	0.949905
black	EVM0024696	0.949783	4.89694e-11	0.949783
cyan	EVM0006630	0.949088	5.5649e-11	0.949088
black	EVM0012415	0.947319	7.64527e-11	0.947319
cyan	EVM0025395	0.946773	8.41384e-11	0.946773
cyan	EVM0016497	0.946209	9.27955e-11	0.946209
cyan	EVM0025733	0.945048	1.13148e-10	0.945048
cyan	EVM0014907	0.944795	1.18081e-10	0.944795
black	EVM0010625	0.944004	1.34739e-10	0.944004
black	EVM0027188	0.943642	1.4305e-10	0.943642
cyan	EVM0026950	0.943508	1.46224e-10	0.943508
black	EVM0001299	0.942801	1.64121e-10	0.942801
black	EVM0024698	0.942386	1.75489e-10	0.942386
black	EVM0027666	0.941598	1.99039e-10	0.941598
black	EVM0020960	0.941121	2.14647e-10	0.941121
black	EVM0004788	0.940482	2.37203e-10	0.940482
black	EVM0015014	0.93969	2.68105e-10	0.93969
cyan	EVM0027561	0.938561	3.18369e-10	0.938561
black	EVM0002544	0.938079	3.42247e-10	0.938079
cyan	EVM0026529	0.93568	4.86473e-10	0.93568
black	EVM0007627	0.93552	4.97782e-10	0.93552
cyan	EVM0016488	0.935325	5.11822e-10	0.935325
cyan	EVM0023477	0.935291	5.14334e-10	0.935291
black	EVM0014475	0.934841	5.48388e-10	0.934841
black	EVM0003237	0.934613	5.66307e-10	0.934613
cyan	EVM0021943	0.932686	7.40667e-10	0.932686
black	EVM0027400	0.932546	7.55e-10	0.932546
cyan	EVM0001282	0.932137	7.98326e-10	0.932137
black	EVM0010558	0.931411	8.80663e-10	0.931411
black	EVM0016450	0.930802	9.55508e-10	0.930802
cyan	EVM0003893	0.930793	9.56731e-10	0.930793
black	EVM0018169	0.929799	1.09113e-09	0.929799
black	EVM0013946	0.92851	1.29051e-09	0.92851
cyan	EVM0016202	0.928128	1.35548e-09	0.928128
cyan	EVM0012567	0.925225	1.95181e-09	0.925225
cyan	EVM0016750	0.9244	2.15915e-09	0.9244
cyan	EVM0004159	0.923546	2.39412e-09	0.923546
black	EVM0003038	0.923244	2.48251e-09	0.923244
cyan	EVM0005937	0.923242	2.48308e-09	0.923242
black	EVM0008118	0.923187	2.49966e-09	0.923187
black	EVM0013470	0.921298	3.12491e-09	0.921298
cyan	EVM0017077	0.919824	3.70571e-09	0.919824
cyan	EVM0008478	0.918788	4.169e-09	0.918788
black	EVM0002359	0.918291	4.40901e-09	0.918291
cyan	EVM0017856	0.91739	4.876e-09	0.91739
cyan	EVM0004007	0.916422	5.4254e-09	0.916422
cyan	EVM0002235	0.916359	5.46288e-09	0.916359
cyan	EVM0017379	0.91606	5.64459e-09	0.91606
cyan	EVM0012197	0.915524	5.98372e-09	0.915524
cyan	EVM0009192	0.914757	6.50028e-09	0.914757
cyan	EVM0005564	0.914719	6.52666e-09	0.914719
cyan	EVM0014963	0.91261	8.16322e-09	0.91261
cyan	EVM0004078	0.912466	8.28638e-09	0.912466
black	EVM0013631	0.912359	8.37956e-09	0.912359
black	EVM0010694	0.912065	8.64059e-09	0.912065
cyan	EVM0026787	0.911796	8.88513e-09	0.911796
cyan	EVM0012401	0.910493	1.0161e-08	0.910493
cyan	EVM0007880	0.91042	1.02367e-08	0.91042
red	EVM0016376	0.921902	2.91142e-09	0.921902
red	EVM0007609	-0.873828	2.28716e-07	-0.873828
red	EVM0024779	0.915177	6.21279e-09	0.915177
red	EVM0010797	0.866567	3.77854e-07	0.866567
red	EVM0000946	0.880921	1.35857e-07	0.880921
red	EVM0017163	0.916857	5.17176e-09	0.916857
red	EVM0009243	0.921802	2.946e-09	0.921802
red	EVM0011426	0.949819	4.86466e-11	0.949819
red	EVM0024699	0.866231	3.8647e-07	0.866231
red	EVM0021135	0.872194	2.56755e-07	0.872194
red	add_RNAAddG002773	-0.943763	1.40215e-10	-0.943763
red	EVM0007396	0.892843	5.23301e-08	0.892843
red	EVM0009201	0.954398	1.99586e-11	0.954398
red	EVM0026402	0.890407	6.41545e-08	0.890407
red	EVM0026652	0.889129	7.12553e-08	0.889129
red	EVM0020263	0.900783	2.5999e-08	0.900783
red	EVM0019487	0.873109	2.40695e-07	0.873109
red	EVM0016243	-0.873791	2.29315e-07	-0.873791
red	EVM0016846	0.912948	7.87847e-09	0.912948
red	EVM0002294	0.943167	1.54622e-10	0.943167
red	EVM0004486	0.899415	2.94502e-08	0.899415
red	EVM0010352	0.864265	4.40374e-07	0.864265
red	EVM0011989	0.915858	5.77046e-09	0.915858
red	EVM0010756	0.956653	1.24351e-11	0.956653
red	EVM0008317	0.881622	1.28807e-07	0.881622
red	EVM0016473	0.91406	7.00381e-09	0.91406
red	EVM0013563	0.890395	6.42172e-08	0.890395
red	EVM0026068	0.904815	1.78157e-08	0.904815
red	EVM0021601	-0.938407	3.25811e-10	-0.938407
red	EVM0014636	-0.899821	2.8385e-08	-0.899821
red	EVM0017039	-0.905502	1.66781e-08	-0.905502
red	EVM0026487	0.888003	7.80797e-08	0.888003
red	EVM0011600	-0.907243	1.40744e-08	-0.907243
red	EVM0009800	0.881563	1.29385e-07	0.881563
red	EVM0015765	0.91699	5.09635e-09	0.91699
red	EVM0003683	0.884379	1.04125e-07	0.884379
red	EVM0019346	-0.937712	3.61446e-10	-0.937712
red	EVM0027426	-0.916919	5.13677e-09	-0.916919
red	EVM0010632	-0.930651	9.74989e-10	-0.930651
red	EVM0009342	-0.946041	9.55189e-11	-0.946041
red	EVM0015348	0.966431	1.13926e-12	0.966431
red	EVM0014460	-0.872688	2.47975e-07	-0.872688
red	EVM0018624	0.904637	1.81225e-08	0.904637
red	EVM0018557	0.974348	9.12592e-14	0.974348
red	EVM0006323	0.962037	3.60317e-12	0.962037
red	EVM0020291	0.92282	2.61148e-09	0.92282
red	EVM0011868	0.957155	1.11566e-11	0.957155
red	EVM0025530	0.948567	6.11778e-11	0.948567
red	EVM0025852	0.891541	5.83812e-08	0.891541
red	EVM0001825	0.963406	2.55563e-12	0.963406
red	EVM0021481	0.95916	7.13064e-12	0.95916
red	EVM0014937	0.979969	8.89458e-15	0.979969
red	EVM0016888	0.908411	1.25365e-08	0.908411
red	EVM0026663	0.944663	1.20725e-10	0.944663
red	EVM0026727	0.957269	1.08822e-11	0.957269
red	EVM0021489	0.881342	1.31588e-07	0.881342
red	EVM0015464	0.900905	2.57092e-08	0.900905
red	EVM0025950	-0.904921	1.7636e-08	-0.904921
red	EVM0014303	0.900268	2.7255e-08	0.900268
red	EVM0009828	0.930174	1.03861e-09	0.930174
red	EVM0016354	0.862657	4.89283e-07	0.862657
red	EVM0007238	-0.920097	3.59126e-09	-0.920097
red	EVM0021884	0.850797	1.02384e-06	0.850797
red	EVM0016758	0.993191	3.30704e-19	0.993191
red	EVM0000559	0.940311	2.4361e-10	0.940311
red	EVM0027320	-0.928321	1.32229e-09	-0.928321
red	EVM0026248	-0.875076	2.09164e-07	-0.875076
red	EVM0026134	0.941835	1.91674e-10	0.941835
red	EVM0022973	0.923593	2.38083e-09	0.923593
red	EVM0021089	0.881144	1.33576e-07	0.881144
red	EVM0008426	0.906833	1.46533e-08	0.906833
red	EVM0021203	0.962083	3.56267e-12	0.962083
red	EVM0022526	-0.870254	2.93932e-07	-0.870254
red	EVM0005681	0.868909	3.22424e-07	0.868909
red	EVM0027373	0.988201	6.01648e-17	0.988201
red	EVM0012912	0.960621	5.07389e-12	0.960621
red	EVM0017740	0.859495	5.99637e-07	0.859495
red	EVM0010626	0.950635	4.17625e-11	0.950635
red	EVM0022007	0.958047	9.16548e-12	0.958047
red	EVM0025699	0.893109	5.11632e-08	0.893109
red	EVM0010074	0.947994	6.78117e-11	0.947994
red	EVM0001721	0.947503	7.39991e-11	0.947503
red	EVM0015283	0.909281	1.14897e-08	0.909281
red	EVM0005348	0.930635	9.77092e-10	0.930635
red	EVM0005030	-0.958742	7.84268e-12	-0.958742
red	EVM0027503	0.942631	1.68683e-10	0.942631
red	EVM0016132	0.992139	1.28934e-18	0.992139
red	EVM0006891	0.919178	3.98882e-09	0.919178
red	EVM0015423	0.904111	1.90544e-08	0.904111
red	EVM0005239	0.857648	6.73728e-07	0.857648
red	EVM0014440	0.890913	6.15211e-08	0.890913
red	EVM0004603	0.882773	1.17941e-07	0.882773
red	EVM0011078	0.966301	1.18113e-12	0.966301
red	EVM0017265	0.892827	5.2398e-08	0.892827
red	EVM0006572	0.879816	1.4765e-07	0.879816
red	EVM0003978	0.893497	4.95009e-08	0.893497
red	EVM0022420	0.902608	2.19556e-08	0.902608
red	EVM0020070	0.86504	4.18388e-07	0.86504
red	EVM0015521	0.932201	7.91393e-10	0.932201
red	EVM0007244	-0.860245	5.71634e-07	-0.860245
red	EVM0014147	0.872726	2.47307e-07	0.872726
red	EVM0017545	0.903077	2.10105e-08	0.903077
red	EVM0021743	0.923208	2.49349e-09	0.923208
red	EVM0008992	0.931689	8.48323e-10	0.931689
red	EVM0005465	0.927884	1.39838e-09	0.927884
red	EVM0016983	0.875641	2.00805e-07	0.875641
red	EVM0010592	0.951203	3.75019e-11	0.951203
red	EVM0015916	0.910009	1.06747e-08	0.910009
red	EVM0011660	0.966866	1.0081e-12	0.966866
red	EVM0024791	0.934011	6.16386e-10	0.934011
red	EVM0008673	0.902193	2.28227e-08	0.902193
red	EVM0008792	-0.892295	5.48035e-08	-0.892295
red	EVM0018743	-0.889357	6.99411e-08	-0.889357
red	EVM0000387	0.885197	9.76556e-08	0.885197
red	EVM0025974	0.925471	1.89346e-09	0.925471
red	EVM0020576	0.89832	3.24982e-08	0.89832
red	EVM0005116	0.952773	2.76534e-11	0.952773
red	EVM0012940	0.942516	1.7184e-10	0.942516
red	EVM0008642	0.874638	2.15858e-07	0.874638
red	EVM0005607	0.863485	4.63545e-07	0.863485
red	EVM0006386	-0.924202	2.21184e-09	-0.924202
red	EVM0012868	0.955906	1.45857e-11	0.955906
red	EVM0015462	0.966202	1.21403e-12	0.966202
red	EVM0008277	0.890128	6.56497e-08	0.890128
red	EVM0011073	0.933104	6.99249e-10	0.933104
red	EVM0011052	0.880428	1.4101e-07	0.880428
red	EVM0025734	0.857199	6.92931e-07	0.857199
red	EVM0005163	0.898499	3.19792e-08	0.898499
red	EVM0019959	0.945315	1.08146e-10	0.945315
red	EVM0025684	0.983175	1.71834e-15	0.983175
greenyellow	EVM0005118	0.8991	3.03002e-08	0.8991
greenyellow	EVM0026210	0.869824	3.02775e-07	0.869824
greenyellow	EVM0003304	0.888503	7.49826e-08	0.888503
greenyellow	EVM0009495	0.912709	8.07822e-09	0.912709
greenyellow	EVM0009260	-0.864065	4.46234e-07	-0.864065
greenyellow	EVM0017097	0.868574	3.29881e-07	0.868574
greenyellow	EVM0017178	0.983918	1.12166e-15	0.983918
greenyellow	EVM0010408	0.957671	9.9615e-12	0.957671
greenyellow	EVM0006752	0.865474	4.06511e-07	0.865474
greenyellow	EVM0001696	0.859817	5.87456e-07	0.859817
greenyellow	EVM0015183	0.940304	2.43859e-10	0.940304
greenyellow	EVM0010447	0.906823	1.46666e-08	0.906823
greenyellow	EVM0022806	0.859069	6.16034e-07	0.859069
greenyellow	EVM0019374	-0.887961	7.83444e-08	-0.887961
greenyellow	EVM0007410	0.920716	3.34369e-09	0.920716
greenyellow	EVM0013938	-0.928869	1.23191e-09	-0.928869
greenyellow	EVM0025030	0.969844	4.16861e-13	0.969844
greenyellow	EVM0028055	0.921767	2.95786e-09	0.921767
greenyellow	EVM0016734	0.857805	6.6714e-07	0.857805
greenyellow	EVM0019767	-0.915216	6.18623e-09	-0.915216
greenyellow	EVM0027331	0.89102	6.09763e-08	0.89102
greenyellow	EVM0021563	0.863866	4.521e-07	0.863866
greenyellow	EVM0013339	0.994431	4.9243e-20	0.994431
greenyellow	EVM0012521	0.954797	1.8386e-11	0.954797
greenyellow	EVM0006319	0.913369	7.53615e-09	0.913369
greenyellow	EVM0027033	-0.896531	3.80769e-08	-0.896531
greenyellow	EVM0023392	0.965348	1.53391e-12	0.965348
greenyellow	EVM0024997	0.97666	3.75282e-14	0.97666
greenyellow	EVM0018423	0.946017	9.59194e-11	0.946017
greenyellow	EVM0015033	0.96661	1.08352e-12	0.96661
greenyellow	EVM0003407	0.882567	1.19821e-07	0.882567
greenyellow	EVM0024132	0.957996	9.27013e-12	0.957996
greenyellow	EVM0013944	0.867121	3.6404e-07	0.867121
greenyellow	EVM0024012	0.899117	3.02519e-08	0.899117
greenyellow	EVM0026154	0.942017	1.86205e-10	0.942017
greenyellow	EVM0001048	0.920292	3.51152e-09	0.920292
greenyellow	EVM0004220	0.907591	1.35993e-08	0.907591
greenyellow	EVM0001784	0.984831	6.46025e-16	0.984831
greenyellow	EVM0017785	0.881891	1.26189e-07	0.881891
greenyellow	EVM0010321	0.933128	6.96953e-10	0.933128
greenyellow	EVM0008750	0.892216	5.51701e-08	0.892216
greenyellow	EVM0019808	0.904381	1.85709e-08	0.904381
greenyellow	EVM0019432	0.980194	7.99678e-15	0.980194
greenyellow	EVM0007008	-0.881898	1.26128e-07	-0.881898
greenyellow	EVM0001289	0.923691	2.35281e-09	0.923691
greenyellow	EVM0011756	0.868067	3.41453e-07	0.868067
greenyellow	EVM0003473	0.950623	4.1859e-11	0.950623
greenyellow	EVM0021988	0.90447	1.84132e-08	0.90447
greenyellow	EVM0017736	0.958764	7.80366e-12	0.958764
greenyellow	EVM0020445	0.908258	1.27289e-08	0.908258
greenyellow	EVM0017014	0.98492	6.11383e-16	0.98492
greenyellow	EVM0014118	0.881771	1.27355e-07	0.881771
greenyellow	EVM0002505	0.989385	2.21456e-17	0.989385
greenyellow	EVM0025544	0.952246	3.06647e-11	0.952246
greenyellow	EVM0026717	0.972914	1.52116e-13	0.972914
greenyellow	EVM0018051	0.951246	3.71939e-11	0.951246
greenyellow	EVM0004441	-0.898173	3.29271e-08	-0.898173
greenyellow	EVM0021612	-0.91036	1.02998e-08	-0.91036
greenyellow	EVM0008230	-0.887108	8.39105e-08	-0.887108
greenyellow	EVM0003521	-0.89144	5.88794e-08	-0.89144
greenyellow	EVM0022360	0.865486	4.06166e-07	0.865486
greenyellow	EVM0020446	0.931645	8.53374e-10	0.931645
greenyellow	EVM0013516	0.912546	8.2176e-09	0.912546
greenyellow	EVM0011931	0.926746	1.6155e-09	0.926746
greenyellow	EVM0013400	0.91504	6.305e-09	0.91504
greenyellow	EVM0010227	0.867036	3.66132e-07	0.867036
greenyellow	EVM0009143	0.960559	5.1492e-12	0.960559
greenyellow	EVM0017631	0.928669	1.26433e-09	0.928669
greenyellow	EVM0025639	-0.962554	3.16921e-12	-0.962554
greenyellow	EVM0011941	-0.866931	3.68716e-07	-0.866931
greenyellow	EVM0005221	0.913592	7.36103e-09	0.913592
greenyellow	EVM0014317	0.85886	6.24247e-07	0.85886
greenyellow	EVM0004857	0.891259	5.97737e-08	0.891259
greenyellow	EVM0025295	-0.931336	8.89621e-10	-0.931336
greenyellow	EVM0023017	0.878789	1.59417e-07	0.878789
greenyellow	EVM0014083	-0.972351	1.8459e-13	-0.972351
greenyellow	EVM0023038	0.968227	6.80424e-13	0.968227
greenyellow	EVM0016200	0.895093	4.31633e-08	0.895093
greenyellow	EVM0016838	0.907859	1.3244e-08	0.907859
greenyellow	EVM0013836	0.977147	3.07752e-14	0.977147
greenyellow	EVM0006091	0.899642	2.88507e-08	0.899642
greenyellow	EVM0015538	0.883967	1.07526e-07	0.883967
greenyellow	EVM0022005	0.95814	8.97938e-12	0.95814
greenyellow	EVM0012120	0.905588	1.65393e-08	0.905588
greenyellow	EVM0014932	0.961622	3.98862e-12	0.961622
greenyellow	EVM0003939	0.924644	2.09585e-09	0.924644
greenyellow	EVM0015125	-0.851948	9.55708e-07	-0.851948
greenyellow	EVM0019710	0.923525	2.40032e-09	0.923525
greenyellow	EVM0023748	-0.902199	2.28101e-08	-0.902199
greenyellow	EVM0004436	0.899326	2.96882e-08	0.899326
greenyellow	EVM0018213	0.875289	2.05975e-07	0.875289
turquoise	EVM0017447	0.954932	1.78815e-11	0.954932
turquoise	EVM0010553	0.982517	2.46761e-15	0.982517
turquoise	EVM0011304	0.871545	2.68705e-07	0.871545
turquoise	EVM0008855	0.985738	3.60998e-16	0.985738
turquoise	EVM0020175	0.940366	2.41548e-10	0.940366
turquoise	EVM0022165	0.985682	3.74545e-16	0.985682
turquoise	EVM0009353	0.956378	1.31929e-11	0.956378
turquoise	EVM0012259	0.974429	8.8583e-14	0.974429
turquoise	EVM0003371	0.965584	1.43887e-12	0.965584
turquoise	EVM0003112	0.977423	2.74473e-14	0.977423
turquoise	EVM0014948	0.983585	1.36146e-15	0.983585
turquoise	EVM0007719	0.93731	3.83666e-10	0.93731
turquoise	EVM0004344	0.984473	8.0548e-16	0.984473
turquoise	EVM0023000	0.871851	2.63004e-07	0.871851
turquoise	EVM0014105	0.877975	1.69321e-07	0.877975
turquoise	EVM0003491	0.994192	7.33375e-20	0.994192
turquoise	EVM0006300	0.960361	5.39614e-12	0.960361
turquoise	EVM0010867	0.984167	9.68409e-16	0.984167
turquoise	EVM0026708	0.982809	2.10452e-15	0.982809
turquoise	EVM0020898	0.994635	3.459e-20	0.994635
turquoise	EVM0014628	0.875284	2.0605e-07	0.875284
turquoise	EVM0016219	0.918741	4.19134e-09	0.918741
turquoise	EVM0013226	0.929997	1.06315e-09	0.929997
turquoise	EVM0006250	0.968828	5.68883e-13	0.968828
turquoise	EVM0005220	0.964561	1.8929e-12	0.964561
turquoise	EVM0018160	0.884696	1.01579e-07	0.884696
turquoise	EVM0001404	0.885777	9.32856e-08	0.885777
turquoise	EVM0020894	0.979778	9.72652e-15	0.979778
turquoise	EVM0021410	0.868876	3.2314e-07	0.868876
turquoise	EVM0002612	0.975522	5.87365e-14	0.975522
turquoise	EVM0000615	0.903764	1.96919e-08	0.903764
turquoise	EVM0011643	0.905272	1.7052e-08	0.905272
turquoise	EVM0012747	0.974856	7.56156e-14	0.974856
turquoise	EVM0010306	0.969313	4.90981e-13	0.969313
turquoise	EVM0005667	0.989861	1.43441e-17	0.989861
turquoise	EVM0011275	0.851143	1.00294e-06	0.851143
turquoise	EVM0022616	0.994157	7.7634e-20	0.994157
turquoise	EVM0020492	0.987154	1.34401e-16	0.987154
turquoise	EVM0014461	0.978597	1.66078e-14	0.978597
turquoise	EVM0022603	0.984525	7.80134e-16	0.984525
turquoise	EVM0022240	0.971224	2.68543e-13	0.971224
turquoise	EVM0018398	0.887703	7.99882e-08	0.887703
turquoise	add_RNAAddG004655	0.944085	1.32935e-10	0.944085
turquoise	EVM0020647	0.991948	1.61834e-18	0.991948
turquoise	EVM0027222	0.946792	8.38561e-11	0.946792
turquoise	EVM0019665	0.985072	5.55511e-16	0.985072
turquoise	EVM0020949	0.912056	8.64891e-09	0.912056
turquoise	EVM0021682	0.880292	1.42467e-07	0.880292
turquoise	EVM0025657	0.930637	9.76766e-10	0.930637
turquoise	EVM0014116	0.988424	5.02615e-17	0.988424
turquoise	EVM0006141	0.990465	8.02332e-18	0.990465
turquoise	EVM0011344	0.986486	2.1702e-16	0.986486
turquoise	EVM0003692	0.990243	9.96879e-18	0.990243
turquoise	EVM0000315	0.892713	5.29069e-08	0.892713
turquoise	EVM0015817	0.994548	4.02235e-20	0.994548
turquoise	EVM0020650	0.981088	5.17478e-15	0.981088
turquoise	EVM0022970	0.986874	1.64725e-16	0.986874
turquoise	EVM0014008	0.977169	3.05005e-14	0.977169
turquoise	EVM0012451	0.97921	1.26307e-14	0.97921
turquoise	EVM0000953	0.984362	8.61098e-16	0.984362
turquoise	EVM0023426	0.967883	7.52612e-13	0.967883
turquoise	EVM0005437	0.979419	1.14807e-14	0.979419
turquoise	EVM0014266	0.948987	5.66898e-11	0.948987
turquoise	EVM0014571	0.962253	3.41537e-12	0.962253
turquoise	EVM0016544	0.918893	4.11978e-09	0.918893
turquoise	EVM0011250	0.963084	2.7733e-12	0.963084
turquoise	EVM0023746	0.861794	5.17469e-07	0.861794
turquoise	EVM0013164	0.934114	6.07561e-10	0.934114
turquoise	EVM0018968	0.991596	2.42676e-18	0.991596
turquoise	EVM0002346	0.970582	3.30383e-13	0.970582
turquoise	EVM0008117	-0.852211	9.40711e-07	-0.852211
turquoise	EVM0012929	0.982529	2.4518e-15	0.982529
turquoise	EVM0025362	0.92868	1.26251e-09	0.92868
turquoise	EVM0004030	0.856231	7.35909e-07	0.856231
turquoise	EVM0011638	0.888919	7.24836e-08	0.888919
turquoise	EVM0026292	0.853087	8.92279e-07	0.853087
turquoise	EVM0027302	-0.907615	1.35678e-08	-0.907615
turquoise	EVM0006815	0.961088	4.53899e-12	0.961088
turquoise	EVM0007499	0.953658	2.31891e-11	0.953658
turquoise	EVM0009216	0.987532	1.01359e-16	0.987532
turquoise	EVM0013308	0.982154	2.99397e-15	0.982154
turquoise	EVM0024689	0.96167	3.94228e-12	0.96167
turquoise	EVM0006858	0.964725	1.8124e-12	0.964725
turquoise	EVM0022481	0.868466	3.32323e-07	0.868466
turquoise	EVM0014974	0.973197	1.37845e-13	0.973197
turquoise	EVM0022950	0.935905	4.70915e-10	0.935905
turquoise	EVM0022143	0.970793	3.08782e-13	0.970793
turquoise	EVM0013673	0.993147	3.51601e-19	0.993147
turquoise	EVM0010715	0.959611	6.42835e-12	0.959611
turquoise	EVM0002511	0.972585	1.70374e-13	0.972585
turquoise	EVM0022968	0.990004	1.2533e-17	0.990004
turquoise	EVM0022636	0.990962	4.83409e-18	0.990962
turquoise	EVM0020701	0.950023	4.68373e-11	0.950023
turquoise	EVM0021231	0.970627	3.2565e-13	0.970627
turquoise	EVM0028027	0.91643	5.42076e-09	0.91643
turquoise	EVM0002063	0.956816	1.20058e-11	0.956816
turquoise	EVM0021860	0.98621	2.62609e-16	0.98621
turquoise	EVM0012776	0.946742	8.45952e-11	0.946742
turquoise	EVM0016144	0.890561	6.33408e-08	0.890561
turquoise	EVM0011355	0.988814	3.63478e-17	0.988814
turquoise	EVM0012956	0.993745	1.47941e-19	0.993745
turquoise	EVM0020163	0.996148	1.49291e-21	0.996148
turquoise	EVM0020427	0.850706	1.02941e-06	0.850706
turquoise	EVM0005889	0.989866	1.42818e-17	0.989866
turquoise	EVM0015575	0.967448	8.53762e-13	0.967448
turquoise	EVM0013376	0.919015	4.06312e-09	0.919015
turquoise	EVM0024182	0.916512	5.37209e-09	0.916512
turquoise	EVM0012664	0.943981	1.35244e-10	0.943981
turquoise	EVM0017788	0.987692	8.97237e-17	0.987692
turquoise	EVM0016090	0.932157	7.96122e-10	0.932157
turquoise	EVM0017480	0.988499	4.72275e-17	0.988499
turquoise	EVM0017251	0.966215	1.20987e-12	0.966215
turquoise	EVM0021686	0.88202	1.2495e-07	0.88202
turquoise	EVM0008908	0.995712	4.13173e-21	0.995712
turquoise	EVM0012238	0.988303	5.54459e-17	0.988303
turquoise	EVM0007373	0.926497	1.66658e-09	0.926497
turquoise	add_RNAAddG013881	0.984655	7.20606e-16	0.984655
turquoise	EVM0021868	0.882594	1.19573e-07	0.882594
turquoise	EVM0008842	0.98308	1.81191e-15	0.98308
turquoise	EVM0020793	0.936922	4.06173e-10	0.936922
turquoise	EVM0023360	0.990567	7.24399e-18	0.990567
turquoise	EVM0005203	0.979271	1.22845e-14	0.979271
turquoise	EVM0022018	0.875977	1.95979e-07	0.875977
turquoise	EVM0025864	0.99206	1.41711e-18	0.99206
turquoise	EVM0027490	0.98674	1.81414e-16	0.98674
turquoise	EVM0005851	0.954541	1.93817e-11	0.954541
turquoise	EVM0019043	0.986979	1.52765e-16	0.986979
turquoise	EVM0014533	0.878319	1.65075e-07	0.878319
turquoise	EVM0023640	0.964246	2.05612e-12	0.964246
turquoise	EVM0002021	0.95528	1.66356e-11	0.95528
turquoise	EVM0019168	0.987733	8.69069e-17	0.987733
turquoise	EVM0000856	0.886196	9.02391e-08	0.886196
turquoise	EVM0014897	0.891606	5.80651e-08	0.891606
turquoise	EVM0014752	0.97464	8.1924e-14	0.97464
turquoise	EVM0015077	0.976255	4.41281e-14	0.976255
turquoise	EVM0019530	0.984604	7.43545e-16	0.984604
turquoise	EVM0026893	0.989045	2.98226e-17	0.989045
turquoise	EVM0025253	0.980028	8.65065e-15	0.980028
turquoise	EVM0005269	0.954878	1.80805e-11	0.954878
turquoise	EVM0026583	0.967706	7.92507e-13	0.967706
turquoise	EVM0007953	0.955886	1.46485e-11	0.955886
turquoise	EVM0021757	0.988528	4.61411e-17	0.988528
turquoise	EVM0016108	0.979986	8.82605e-15	0.979986
turquoise	EVM0006123	0.982241	2.86059e-15	0.982241
turquoise	EVM0020612	0.950541	4.25148e-11	0.950541
turquoise	EVM0000210	0.990756	5.98006e-18	0.990756
turquoise	EVM0026469	0.972892	1.53296e-13	0.972892
turquoise	EVM0015752	0.897851	3.38859e-08	0.897851
turquoise	EVM0013993	0.861394	5.31023e-07	0.861394
turquoise	EVM0010620	0.989705	1.65723e-17	0.989705
turquoise	EVM0012895	0.991006	4.61508e-18	0.991006
turquoise	EVM0000683	0.994868	2.26852e-20	0.994868
turquoise	EVM0027478	0.992167	1.24683e-18	0.992167
turquoise	EVM0025454	0.964887	1.73564e-12	0.964887
turquoise	EVM0022322	0.983354	1.55281e-15	0.983354
turquoise	EVM0015281	0.882972	1.16147e-07	0.882972
turquoise	EVM0021187	0.986373	2.3469e-16	0.986373
turquoise	EVM0016366	-0.937806	3.56473e-10	-0.937806
turquoise	EVM0023726	0.947887	6.91191e-11	0.947887
turquoise	EVM0018121	0.980311	7.56496e-15	0.980311
turquoise	EVM0000764	0.986434	2.2496e-16	0.986434
turquoise	add_RNAAddG017720	0.988017	6.96336e-17	0.988017
turquoise	EVM0011953	0.979242	1.24462e-14	0.979242
turquoise	EVM0017611	0.993114	3.67967e-19	0.993114
turquoise	EVM0006191	0.983413	1.50154e-15	0.983413
turquoise	EVM0014606	0.981023	5.34408e-15	0.981023
turquoise	EVM0018237	0.892817	5.24451e-08	0.892817
turquoise	EVM0021033	0.890671	6.27649e-08	0.890671
turquoise	EVM0024316	0.96739	8.68182e-13	0.96739
turquoise	EVM0010994	0.991842	1.83259e-18	0.991842
turquoise	EVM0018581	0.892796	5.25375e-08	0.892796
turquoise	EVM0017560	0.963478	2.50848e-12	0.963478
turquoise	EVM0008997	0.927571	1.45543e-09	0.927571
turquoise	EVM0011241	0.984099	1.00802e-15	0.984099
turquoise	EVM0017883	0.975646	5.60015e-14	0.975646
turquoise	EVM0001269	0.869908	3.01043e-07	0.869908
turquoise	EVM0001177	0.988016	6.97243e-17	0.988016
turquoise	EVM0002170	0.989279	2.43118e-17	0.989279
turquoise	EVM0026731	0.983644	1.31597e-15	0.983644
turquoise	EVM0007128	0.958969	7.44924e-12	0.958969
turquoise	EVM0014616	0.857502	6.79926e-07	0.857502
turquoise	EVM0004707	0.988782	3.73414e-17	0.988782
turquoise	EVM0005923	0.851273	9.95181e-07	0.851273
turquoise	EVM0028007	0.952081	3.16668e-11	0.952081
turquoise	EVM0006542	0.919114	4.01805e-09	0.919114
turquoise	EVM0024017	0.982812	2.10173e-15	0.982812
turquoise	EVM0027972	0.981477	4.25419e-15	0.981477
turquoise	EVM0015666	0.979578	1.0673e-14	0.979578
turquoise	EVM0004954	0.9096	1.1126e-08	0.9096
turquoise	EVM0006866	0.917029	5.07473e-09	0.917029
turquoise	EVM0016509	0.99534	9.08892e-21	0.99534
turquoise	EVM0015445	0.952196	3.09642e-11	0.952196
turquoise	EVM0020339	0.934625	5.65384e-10	0.934625
turquoise	EVM0016762	0.982059	3.14797e-15	0.982059
turquoise	EVM0019229	0.975952	4.97197e-14	0.975952
turquoise	EVM0017119	0.912363	8.37644e-09	0.912363
turquoise	EVM0024738	0.920955	3.25238e-09	0.920955
turquoise	EVM0003008	0.971094	2.80225e-13	0.971094
turquoise	EVM0027554	0.951987	3.22501e-11	0.951987
turquoise	EVM0006196	0.936767	4.15523e-10	0.936767
turquoise	EVM0011101	0.951359	3.64e-11	0.951359
turquoise	EVM0020400	0.929604	1.1194e-09	0.929604
turquoise	EVM0014150	0.989994	1.26618e-17	0.989994
turquoise	EVM0016341	0.987827	8.08037e-17	0.987827
turquoise	EVM0019549	0.973866	1.087e-13	0.973866
turquoise	EVM0011500	0.942647	1.68244e-10	0.942647
turquoise	EVM0010478	0.869083	3.18607e-07	0.869083
turquoise	EVM0024901	0.975592	5.71661e-14	0.975592
turquoise	EVM0007529	0.970154	3.78399e-13	0.970154
turquoise	EVM0021241	0.985003	5.80214e-16	0.985003
turquoise	EVM0002459	0.972143	1.98004e-13	0.972143
turquoise	EVM0019238	0.928611	1.27383e-09	0.928611
turquoise	EVM0002704	0.953488	2.39928e-11	0.953488
turquoise	EVM0008242	0.969403	4.77734e-13	0.969403
turquoise	EVM0013859	0.979573	1.06965e-14	0.979573
turquoise	EVM0013287	0.950482	4.29838e-11	0.950482
turquoise	EVM0009818	0.983294	1.60654e-15	0.983294
turquoise	EVM0008943	0.952356	3.00138e-11	0.952356
turquoise	EVM0004186	0.978999	1.38896e-14	0.978999
turquoise	EVM0008489	0.909333	1.14295e-08	0.909333
turquoise	EVM0020823	0.992597	7.30462e-19	0.992597
turquoise	EVM0002452	0.995819	3.2487e-21	0.995819
turquoise	EVM0011894	0.953882	2.21625e-11	0.953882
turquoise	EVM0025216	0.982207	2.9113e-15	0.982207
turquoise	EVM0013449	0.978852	1.48331e-14	0.978852
turquoise	EVM0027598	0.977812	2.33064e-14	0.977812
turquoise	EVM0015118	0.980899	5.68392e-15	0.980899
turquoise	EVM0017366	0.986479	2.1812e-16	0.986479
turquoise	EVM0016337	0.908489	1.24392e-08	0.908489
turquoise	EVM0015019	0.852209	9.40854e-07	0.852209
turquoise	EVM0025243	0.992736	6.10395e-19	0.992736
turquoise	EVM0000301	0.968807	5.72493e-13	0.968807
turquoise	EVM0025412	0.983224	1.67123e-15	0.983224
turquoise	EVM0026287	0.957898	9.47384e-12	0.957898
turquoise	EVM0004844	0.937386	3.79364e-10	0.937386
turquoise	EVM0009654	0.885802	9.31052e-08	0.885802
turquoise	EVM0026321	0.961253	4.36156e-12	0.961253
turquoise	EVM0009594	0.882834	1.17389e-07	0.882834
turquoise	EVM0010461	0.966469	1.12712e-12	0.966469
turquoise	EVM0006157	0.985258	4.93355e-16	0.985258
turquoise	EVM0011416	0.953378	2.4528e-11	0.953378
turquoise	EVM0027050	0.896152	3.93637e-08	0.896152
turquoise	EVM0017253	0.970464	3.4306e-13	0.970464
turquoise	EVM0006476	0.911713	8.96246e-09	0.911713
turquoise	EVM0010468	0.961121	4.50223e-12	0.961121
turquoise	EVM0003639	0.953756	2.27361e-11	0.953756
turquoise	EVM0015888	0.955302	1.65581e-11	0.955302
turquoise	EVM0024586	0.996703	3.41856e-22	0.996703
turquoise	EVM0025749	0.875668	2.00414e-07	0.875668
turquoise	EVM0021665	0.918158	4.47556e-09	0.918158
turquoise	EVM0007640	0.933974	6.19623e-10	0.933974
turquoise	EVM0021188	0.994091	8.62925e-20	0.994091
turquoise	EVM0003041	0.99756	1.9604e-23	0.99756
turquoise	EVM0011604	0.981396	4.43274e-15	0.981396
turquoise	EVM0017149	0.890135	6.56079e-08	0.890135
turquoise	EVM0016610	0.983901	1.13316e-15	0.983901
turquoise	EVM0027805	0.905221	1.71352e-08	0.905221
turquoise	EVM0006933	0.902898	2.13681e-08	0.902898
turquoise	EVM0015341	0.956017	1.42472e-11	0.956017
turquoise	EVM0007987	0.99493	2.0228e-20	0.99493
turquoise	EVM0019241	0.983842	1.17257e-15	0.983842
turquoise	EVM0027392	0.955579	1.56271e-11	0.955579
turquoise	EVM0027814	0.943433	1.48031e-10	0.943433
turquoise	EVM0022758	0.936187	4.52143e-10	0.936187
turquoise	EVM0020848	0.984579	7.54779e-16	0.984579
turquoise	EVM0020053	0.957654	9.999e-12	0.957654
turquoise	EVM0027742	0.983578	1.36647e-15	0.983578
turquoise	EVM0012116	0.980549	6.74411e-15	0.980549
turquoise	EVM0013784	0.988748	3.84259e-17	0.988748
turquoise	EVM0015493	0.971069	2.82466e-13	0.971069
cyan	EVM0001414	0.909515	1.12213e-08	0.909515
cyan	EVM0011285	0.908035	1.30144e-08	0.908035
black	EVM0027087	0.907275	1.40306e-08	0.907275
black	EVM0020155	0.907255	1.40584e-08	0.907255
cyan	EVM0027735	0.907006	1.44068e-08	0.907006
black	EVM0019104	0.906756	1.47641e-08	0.906756
cyan	EVM0019008	0.906672	1.48853e-08	0.906672
black	EVM0023256	0.906313	1.54161e-08	0.906313
black	EVM0020754	0.904502	1.83569e-08	0.904502
black	EVM0002203	0.904449	1.84505e-08	0.904449
black	EVM0009441	0.902903	2.13579e-08	0.902903
cyan	EVM0000266	0.902045	2.31393e-08	0.902045
cyan	EVM0009542	0.900867	2.57989e-08	0.900867
cyan	EVM0021282	0.900809	2.59368e-08	0.900809
cyan	EVM0012408	0.900147	2.75561e-08	0.900147
cyan	EVM0016693	0.899211	2.99981e-08	0.899211
cyan	EVM0009026	0.899069	3.03827e-08	0.899069
black	EVM0012594	0.897135	3.61068e-08	0.897135
cyan	EVM0009579	0.896801	3.7185e-08	0.896801
cyan	EVM0022626	0.896124	3.94619e-08	0.896124
cyan	EVM0023959	0.895976	3.99757e-08	0.895976
cyan	EVM0024812	0.895451	4.1844e-08	0.895451
cyan	EVM0001407	0.895046	4.33398e-08	0.895046
cyan	EVM0016034	0.894815	4.4213e-08	0.894815
cyan	EVM0020736	0.894531	4.53095e-08	0.894531
black	EVM0003170	0.894372	4.59336e-08	0.894372
cyan	EVM0006797	0.892987	5.16923e-08	0.892987
cyan	EVM0004858	0.892265	5.49443e-08	0.892265
cyan	EVM0008621	0.890459	6.38801e-08	0.890459
cyan	EVM0019895	0.890181	6.53608e-08	0.890181
cyan	EVM0019547	0.889842	6.72112e-08	0.889842
black	EVM0023509	0.888741	7.35427e-08	0.888741
cyan	EVM0016453	0.887801	7.93624e-08	0.887801
cyan	EVM0000597	0.886719	8.65588e-08	0.886719
cyan	EVM0015940	0.886046	9.13207e-08	0.886046
black	EVM0002361	0.88434	1.04445e-07	0.88434
cyan	EVM0022473	0.884097	1.06447e-07	0.884097
cyan	EVM0015193	0.880704	1.38107e-07	0.880704
cyan	EVM0008851	0.879528	1.50874e-07	0.879528
black	EVM0018048	0.879404	1.52273e-07	0.879404
black	EVM0009787	0.877794	1.71597e-07	0.877794
cyan	EVM0024056	0.877655	1.73361e-07	0.877655
cyan	EVM0016635	0.877583	1.74285e-07	0.877583
cyan	EVM0003771	0.876702	1.8591e-07	0.876702
cyan	EVM0005202	0.874263	2.21735e-07	0.874263
cyan	EVM0004520	0.873964	2.26507e-07	0.873964
black	EVM0023358	0.873698	2.30844e-07	0.873698
cyan	EVM0002390	0.871269	2.73922e-07	0.871269
black	EVM0014035	0.870109	2.96878e-07	0.870109
black	EVM0025538	0.86949	3.09827e-07	0.86949
cyan	EVM0027253	0.869402	3.11706e-07	0.869402
cyan	EVM0015577	0.867044	3.65932e-07	0.867044
black	EVM0008972	0.866806	3.71832e-07	0.866806
cyan	EVM0020135	0.866428	3.81391e-07	0.866428
cyan	EVM0020705	0.866265	3.85594e-07	0.866265
cyan	EVM0023058	0.864864	4.23306e-07	0.864864
cyan	EVM0014019	0.863831	4.53133e-07	0.863831
cyan	EVM0010818	0.8634	4.66128e-07	0.8634
cyan	EVM0025354	0.86043	5.64916e-07	0.86043
cyan	EVM0008850	0.856779	7.11299e-07	0.856779
cyan	EVM0016948	0.855968	7.48005e-07	0.855968
cyan	EVM0023078	0.854979	7.9503e-07	0.854979
cyan	EVM0001102	0.853941	8.47124e-07	0.853941
cyan	EVM0017601	0.853239	8.84092e-07	0.853239
cyan	EVM0000014	-0.875826	1.98141e-07	-0.875826
cyan	EVM0009562	-0.882617	1.19366e-07	-0.882617
cyan	EVM0016256	-0.890783	6.21858e-08	-0.890783
cyan	EVM0000722	-0.907329	1.39559e-08	-0.907329
cyan	EVM0021493	-0.924431	2.15114e-09	-0.924431
lightcyan	EVM0013621	0.929736	1.10026e-09	0.929736
lightcyan	EVM0008340	0.851677	9.71406e-07	0.851677
lightcyan	EVM0009976	0.91423	6.87806e-09	0.91423
lightcyan	EVM0019045	0.868798	3.24878e-07	0.868798
lightcyan	EVM0019031	0.909954	1.07336e-08	0.909954
lightcyan	EVM0023584	0.978704	1.58404e-14	0.978704
lightcyan	EVM0020140	-0.904229	1.88422e-08	-0.904229
lightcyan	EVM0023152	0.926116	1.74802e-09	0.926116
lightcyan	EVM0010945	0.93019	1.03638e-09	0.93019
lightcyan	EVM0007938	0.89732	3.55208e-08	0.89732
lightcyan	EVM0023172	0.866699	3.74534e-07	0.866699
lightcyan	EVM0021514	0.853301	8.80789e-07	0.853301
lightcyan	EVM0017615	0.930748	9.62484e-10	0.930748
lightcyan	EVM0019979	0.9782	1.97388e-14	0.9782
lightcyan	EVM0005249	0.898736	3.13086e-08	0.898736
lightcyan	EVM0009565	0.975585	5.73424e-14	0.975585
lightcyan	EVM0021373	0.925277	1.93938e-09	0.925277
lightcyan	EVM0015722	0.977917	2.22879e-14	0.977917
lightcyan	EVM0013549	0.904632	1.81319e-08	0.904632
lightcyan	EVM0027973	0.910508	1.01454e-08	0.910508
lightcyan	EVM0025842	0.919571	3.81445e-09	0.919571
lightcyan	EVM0010986	0.884944	9.96214e-08	0.884944
lightcyan	EVM0015253	0.925806	1.81654e-09	0.925806
lightcyan	EVM0008431	0.914722	6.52465e-09	0.914722
lightcyan	EVM0001325	0.856966	7.0305e-07	0.856966
lightcyan	EVM0024821	0.87142	2.71049e-07	0.87142
lightcyan	EVM0001290	0.886276	8.96673e-08	0.886276
darkred	EVM0020710	0.899513	2.91909e-08	0.899513
darkred	EVM0018351	0.89854	3.18643e-08	0.89854
darkred	EVM0017292	0.98778	8.38086e-17	0.98778
darkred	EVM0021539	0.958401	8.4698e-12	0.958401
darkred	EVM0005764	0.900766	2.60408e-08	0.900766
darkred	EVM0016898	-0.885083	9.85381e-08	-0.885083
darkred	EVM0023458	0.941671	1.96745e-10	0.941671
darkred	EVM0008834	0.963849	2.28e-12	0.963849
darkred	EVM0000008	0.89167	5.77581e-08	0.89167
darkred	EVM0009980	0.99484	2.38936e-20	0.99484
darkred	EVM0000487	0.862028	5.09703e-07	0.862028
darkred	EVM0005057	0.895955	4.00475e-08	0.895955
darkred	EVM0012221	0.888183	7.69523e-08	0.888183
darkred	EVM0010313	0.933384	6.72632e-10	0.933384
darkred	EVM0022619	0.956539	1.27438e-11	0.956539
darkred	EVM0027286	0.946514	8.80165e-11	0.946514
darkred	EVM0007397	0.883458	1.1186e-07	0.883458
darkred	EVM0027191	0.986969	1.53819e-16	0.986969
darkred	EVM0002896	0.952459	2.94174e-11	0.952459
darkred	EVM0005994	0.905871	1.60933e-08	0.905871
darkred	EVM0000894	0.939983	2.56273e-10	0.939983
darkred	EVM0001826	0.971776	2.23937e-13	0.971776
darkred	EVM0020401	0.87542	2.04046e-07	0.87542
darkred	EVM0023314	0.925169	1.96541e-09	0.925169
darkred	EVM0001848	0.928707	1.25814e-09	0.928707
darkred	EVM0000935	0.975645	5.60252e-14	0.975645
darkred	EVM0021257	0.925473	1.89312e-09	0.925473
darkred	EVM0023471	0.956386	1.31704e-11	0.956386
darkred	EVM0002929	0.872787	2.46249e-07	0.872787
darkred	EVM0019384	0.949487	5.17277e-11	0.949487
darkred	EVM0012042	0.858749	6.28627e-07	0.858749
darkred	EVM0009848	0.8788	1.59295e-07	0.8788
darkred	EVM0003487	0.875825	1.98153e-07	0.875825
darkred	EVM0017923	0.951816	3.3337e-11	0.951816
darkred	EVM0004979	0.926051	1.7621e-09	0.926051
darkred	EVM0011454	0.979862	9.35531e-15	0.979862
darkred	EVM0022068	0.929929	1.07271e-09	0.929929
darkred	EVM0022312	0.987783	8.36405e-17	0.987783
darkred	EVM0027712	0.903827	1.95742e-08	0.903827
darkred	EVM0012294	0.985061	5.59174e-16	0.985061
darkred	EVM0013606	0.902735	2.16964e-08	0.902735
darkred	EVM0023525	0.934701	5.59349e-10	0.934701
darkred	EVM0001676	0.856971	7.02834e-07	0.856971
darkred	EVM0001393	0.897744	3.42083e-08	0.897744
darkred	EVM0005508	0.985191	5.14962e-16	0.985191
darkred	EVM0016148	0.886121	9.07796e-08	0.886121
darkred	EVM0010890	-0.857364	6.85785e-07	-0.857364
darkred	EVM0015065	0.876642	1.86722e-07	0.876642
darkred	EVM0023075	0.956159	1.38216e-11	0.956159
darkred	EVM0022383	0.942824	1.63507e-10	0.942824
darkred	EVM0024518	0.889262	7.04856e-08	0.889262
darkred	EVM0012520	0.939656	2.69538e-10	0.939656
darkred	EVM0008888	-0.862741	4.86642e-07	-0.862741
darkred	EVM0015243	0.90507	1.73854e-08	0.90507
darkred	EVM0019539	0.899544	2.91076e-08	0.899544
darkred	EVM0020541	0.914728	6.52035e-09	0.914728
darkred	EVM0008390	-0.87075	2.83999e-07	-0.87075
darkred	EVM0010995	0.925059	1.99214e-09	0.925059
darkred	EVM0012142	0.92121	3.15708e-09	0.92121
darkred	EVM0016226	0.951329	3.66071e-11	0.951329
darkred	EVM0000400	0.957971	9.32202e-12	0.957971
darkred	EVM0017981	0.951565	3.49898e-11	0.951565
darkred	EVM0028033	0.909169	1.162e-08	0.909169
darkred	EVM0017791	0.96577	1.36745e-12	0.96577
darkred	EVM0006841	0.896017	3.98321e-08	0.896017
darkred	EVM0005267	0.953063	2.61138e-11	0.953063
darkred	EVM0014742	0.990985	4.71812e-18	0.990985
darkred	EVM0009680	0.951039	3.86868e-11	0.951039
darkred	EVM0002328	-0.873488	2.34321e-07	-0.873488
darkred	EVM0008722	0.993945	1.08762e-19	0.993945
darkred	EVM0017778	0.919822	3.70664e-09	0.919822
darkred	EVM0017816	0.994897	2.15033e-20	0.994897
darkred	EVM0016657	0.906148	1.56658e-08	0.906148
darkred	EVM0023791	0.963205	2.6896e-12	0.963205
darkred	EVM0016452	0.865136	4.1574e-07	0.865136
darkred	EVM0009824	0.95075	4.08703e-11	0.95075
darkred	EVM0015407	0.910777	9.86993e-09	0.910777
darkred	EVM0015522	0.932223	7.88995e-10	0.932223
darkred	EVM0000887	0.980789	6.00085e-15	0.980789
darkred	EVM0015564	0.873286	2.37699e-07	0.873286
darkred	EVM0016947	0.996204	1.30019e-21	0.996204
darkred	EVM0018804	0.868445	3.32791e-07	0.868445
darkred	EVM0021657	0.945725	1.00849e-10	0.945725
darkred	EVM0009725	0.928096	1.36094e-09	0.928096
darkred	EVM0009371	0.8632	4.72274e-07	0.8632
green	EVM0012493	-0.926579	1.64964e-09	-0.926579
green	EVM0001437	0.974269	9.39383e-14	0.974269
green	EVM0027494	0.871835	2.63306e-07	0.871835
green	EVM0013421	0.853237	8.84201e-07	0.853237
green	EVM0005260	0.96945	4.70901e-13	0.96945
green	EVM0027791	0.958262	8.73803e-12	0.958262
green	EVM0017026	0.906651	1.49166e-08	0.906651
green	EVM0016363	-0.904275	1.87602e-08	-0.904275
green	EVM0022581	0.94138	2.06056e-10	0.94138
green	EVM0012907	0.956694	1.23258e-11	0.956694
green	EVM0023200	-0.92672	1.6206e-09	-0.92672
green	EVM0005916	0.98034	7.4578e-15	0.98034
green	EVM0003694	-0.868792	3.25008e-07	-0.868792
green	EVM0006466	-0.933668	6.46625e-10	-0.933668
green	EVM0002307	0.865816	3.97328e-07	0.865816
green	EVM0015430	0.974117	9.92579e-14	0.974117
green	EVM0013600	-0.864597	4.30835e-07	-0.864597
green	EVM0005784	-0.892235	5.50848e-08	-0.892235
green	EVM0017473	0.935223	5.19371e-10	0.935223
green	EVM0025108	0.894701	4.46483e-08	0.894701
green	EVM0016557	0.93539	5.07122e-10	0.93539
green	EVM0003343	0.912771	8.02638e-09	0.912771
green	EVM0018501	-0.873746	2.30057e-07	-0.873746
green	EVM0006087	0.874941	2.11203e-07	0.874941
green	EVM0014215	-0.900645	2.63294e-08	-0.900645
green	EVM0027961	-0.869043	3.19461e-07	-0.869043
green	EVM0018536	-0.857188	6.93387e-07	-0.857188
green	EVM0009368	-0.91056	1.00916e-08	-0.91056
green	EVM0013018	0.949491	5.16908e-11	0.949491
green	EVM0006652	0.939502	2.75956e-10	0.939502
green	EVM0002135	0.928336	1.3197e-09	0.928336
green	EVM0006560	0.963689	2.3764e-12	0.963689
green	EVM0025660	-0.904022	1.92166e-08	-0.904022
green	EVM0008219	0.947313	7.6538e-11	0.947313
green	EVM0009844	0.918743	4.1902e-09	0.918743
green	EVM0022664	-0.851288	9.94245e-07	-0.851288
green	EVM0016211	0.971952	2.11147e-13	0.971952
green	EVM0003754	0.966888	1.00174e-12	0.966888
green	EVM0027069	0.894059	4.71797e-08	0.894059
green	EVM0014574	-0.901383	2.4602e-08	-0.901383
green	EVM0016249	0.968423	6.4215e-13	0.968423
green	EVM0000574	0.972588	1.70241e-13	0.972588
green	EVM0006491	0.931249	9.00105e-10	0.931249
green	EVM0021760	0.894646	4.48614e-08	0.894646
green	EVM0022254	0.920726	3.33985e-09	0.920726
green	EVM0014133	0.969079	5.27247e-13	0.969079
green	EVM0008699	0.923286	2.47003e-09	0.923286
green	EVM0001141	0.871789	2.6414e-07	0.871789
green	EVM0015862	0.971214	2.69442e-13	0.971214
green	EVM0003932	0.862834	4.83699e-07	0.862834
green	EVM0012756	0.942513	1.71925e-10	0.942513
green	EVM0004121	-0.890632	6.29681e-08	-0.890632
green	EVM0013214	-0.928549	1.284e-09	-0.928549
green	EVM0025280	-0.899846	2.83223e-08	-0.899846
