# Supplementary material for: Genome-wide identification and co-expression network analysis of Aux/IAA gene family in Salvia miltiorrhiza
Source: PeerJ. 2023 Apr 17;11:e15212. doi: 10.7717/peerj.15212 (PMC10117383; doi:10.7717/peerj.15212)
Supplement: Supplemental Information 8 [file peerj-11-15212-s008.xlsx]

## Sheet: S_Table8_module_GO
Module	Class	GO_Name	GO_ID	GO_Level	P_value	EnrichmentScore	HitsGenesCountsInSelectedSet	HitsGenesCountsInBackground	AllGenesCountsInSelectedSet	AllGenesCountsInBackground	GenesOfSelectedSetInGOterm	corrected.p.value.BH.method.
black	Molecular function	transcription regulator activity	GO:0140110	2	0	6.53407	34	1221	40	9386	EVM0008118,EVM0025416,EVM0017196,EVM0013631,EVM0015814,EVM0000041,EVM0027188,EVM0027421,EVM0003237,EVM0002544,EVM0003038,EVM0001299,EVM0003315,EVM0017861,EVM0015209,EVM0020155,EVM0012415,EVM0009746,EVM0000371,EVM0009985,EVM0023258,EVM0010344,EVM0021111,EVM0023256,EVM0012769,EVM0027400,EVM0002361,EVM0007532,EVM0024696,EVM0018373,EVM0012594,EVM0010694,EVM0003092,EVM0019903,	0
black	Molecular function	DNA-binding transcription factor activity	GO:0003700	3	0	6.96169	34	1146	40	9386	EVM0008118,EVM0025416,EVM0017196,EVM0013631,EVM0015814,EVM0000041,EVM0027188,EVM0027421,EVM0003237,EVM0002544,EVM0003038,EVM0001299,EVM0003315,EVM0017861,EVM0015209,EVM0020155,EVM0012415,EVM0009746,EVM0000371,EVM0009985,EVM0023258,EVM0010344,EVM0021111,EVM0023256,EVM0012769,EVM0027400,EVM0002361,EVM0007532,EVM0024696,EVM0018373,EVM0012594,EVM0010694,EVM0003092,EVM0019903,	0
black	Molecular function	sequence-specific DNA binding	GO:0043565	6	1.68e-10	6.38248	17	625	40	9386	EVM0025416,EVM0015814,EVM0027421,EVM0002544,EVM0003038,EVM0003315,EVM0012415,EVM0010558,EVM0009985,EVM0021111,EVM0023256,EVM0012769,EVM0027400,EVM0002361,EVM0007532,EVM0012594,EVM0003092,	2.47e-09
black	Molecular function	DNA binding	GO:0003677	5	2.67e-10	4.86321	20	965	40	9386	EVM0025416,EVM0015814,EVM0027421,EVM0002544,EVM0003038,EVM0003315,EVM0015209,EVM0012415,EVM0010558,EVM0009985,EVM0015830,EVM0010344,EVM0021111,EVM0023256,EVM0012769,EVM0027400,EVM0002361,EVM0007532,EVM0012594,EVM0003092,	2.94e-09
black	Molecular function	transcription cis-regulatory region binding	GO:0000976	8	1.01e-06	6.96291	10	337	40	9386	EVM0025416,EVM0027421,EVM0003315,EVM0010558,EVM0009985,EVM0021111,EVM0023256,EVM0012769,EVM0027400,EVM0007532,	8.89e-06
black	Molecular function	transcription regulatory region nucleic acid binding	GO:0001067	5	1.01e-06	6.96291	10	337	40	9386	EVM0025416,EVM0027421,EVM0003315,EVM0010558,EVM0009985,EVM0021111,EVM0023256,EVM0012769,EVM0027400,EVM0007532,	8.89e-06
black	Molecular function	sequence-specific double-stranded DNA binding	GO:1990837	7	2.25e-06	6.37636	10	368	40	9386	EVM0025416,EVM0027421,EVM0003315,EVM0010558,EVM0009985,EVM0021111,EVM0023256,EVM0012769,EVM0027400,EVM0007532,	1.41e-05
black	Molecular function	double-stranded DNA binding	GO:0003690	6	1.45e-05	5.1685	10	454	40	9386	EVM0025416,EVM0027421,EVM0003315,EVM0010558,EVM0009985,EVM0021111,EVM0023256,EVM0012769,EVM0027400,EVM0007532,	7.99e-05
black	Molecular function	nucleic acid binding	GO:0003676	4	2.68e-05	2.36225	21	2086	40	9386	EVM0025416,EVM0015814,EVM0027421,EVM0027666,EVM0002544,EVM0003038,EVM0003315,EVM0015209,EVM0012415,EVM0010558,EVM0009985,EVM0015830,EVM0010344,EVM0021111,EVM0023256,EVM0012769,EVM0027400,EVM0002361,EVM0007532,EVM0012594,EVM0003092,	0.000130953
black	Molecular function	heterocyclic compound binding	GO:1901363	3	0.000266308	2.0379	21	2418	40	9386	EVM0025416,EVM0015814,EVM0027421,EVM0027666,EVM0002544,EVM0003038,EVM0003315,EVM0015209,EVM0012415,EVM0010558,EVM0009985,EVM0015830,EVM0010344,EVM0021111,EVM0023256,EVM0012769,EVM0027400,EVM0002361,EVM0007532,EVM0012594,EVM0003092,	0.00106523
black	Molecular function	organic cyclic compound binding	GO:0097159	3	0.00027983	2.03118	21	2426	40	9386	EVM0025416,EVM0015814,EVM0027421,EVM0027666,EVM0002544,EVM0003038,EVM0003315,EVM0015209,EVM0012415,EVM0010558,EVM0009985,EVM0015830,EVM0010344,EVM0021111,EVM0023256,EVM0012769,EVM0027400,EVM0002361,EVM0007532,EVM0012594,EVM0003092,	0.00102604
black	Cellular component	nucleus	GO:0005634	6	7.2e-09	2.93767	20	3448	22	11142	EVM0025416,EVM0018729,EVM0027421,EVM0003038,EVM0001299,EVM0016450,EVM0015209,EVM0020155,EVM0010558,EVM0009985,EVM0015830,EVM0010344,EVM0021111,EVM0023256,EVM0012769,EVM0027400,EVM0024696,EVM0018373,EVM0012594,EVM0010694,	1.87e-07
black	Cellular component	intracellular membrane-bounded organelle	GO:0043231	5	0.0246036	1.28428	20	7887	22	11142	EVM0025416,EVM0018729,EVM0027421,EVM0003038,EVM0001299,EVM0016450,EVM0015209,EVM0020155,EVM0010558,EVM0009985,EVM0015830,EVM0010344,EVM0021111,EVM0023256,EVM0012769,EVM0027400,EVM0024696,EVM0018373,EVM0012594,EVM0010694,	0.159923
black	Cellular component	membrane-bounded organelle	GO:0043227	4	0.0261891	1.27925	20	7918	22	11142	EVM0025416,EVM0018729,EVM0027421,EVM0003038,EVM0001299,EVM0016450,EVM0015209,EVM0020155,EVM0010558,EVM0009985,EVM0015830,EVM0010344,EVM0021111,EVM0023256,EVM0012769,EVM0027400,EVM0024696,EVM0018373,EVM0012594,EVM0010694,	0.136183
black	Cellular component	intracellular organelle	GO:0043229	4	0.0439627	1.23767	20	8184	22	11142	EVM0025416,EVM0018729,EVM0027421,EVM0003038,EVM0001299,EVM0016450,EVM0015209,EVM0020155,EVM0010558,EVM0009985,EVM0015830,EVM0010344,EVM0021111,EVM0023256,EVM0012769,EVM0027400,EVM0024696,EVM0018373,EVM0012594,EVM0010694,	0.190505
black	Cellular component	organelle	GO:0043226	3	0.0460801	1.2339	20	8209	22	11142	EVM0025416,EVM0018729,EVM0027421,EVM0003038,EVM0001299,EVM0016450,EVM0015209,EVM0020155,EVM0010558,EVM0009985,EVM0015830,EVM0010344,EVM0021111,EVM0023256,EVM0012769,EVM0027400,EVM0024696,EVM0018373,EVM0012594,EVM0010694,	0.171155
black	Biological process	RNA biosynthetic process	GO:0032774	8	0	5.53073	34	1707	40	11107	EVM0008118,EVM0025416,EVM0017196,EVM0013631,EVM0015814,EVM0000041,EVM0027188,EVM0027421,EVM0003237,EVM0002544,EVM0003038,EVM0001299,EVM0003315,EVM0017861,EVM0015209,EVM0020155,EVM0012415,EVM0009746,EVM0000371,EVM0009985,EVM0023258,EVM0010344,EVM0021111,EVM0023256,EVM0012769,EVM0027400,EVM0002361,EVM0007532,EVM0024696,EVM0018373,EVM0012594,EVM0010694,EVM0003092,EVM0019903,	0
black	Biological process	regulation of RNA metabolic process	GO:0051252	7	0	5.45089	34	1732	40	11107	EVM0008118,EVM0025416,EVM0017196,EVM0013631,EVM0015814,EVM0000041,EVM0027188,EVM0027421,EVM0003237,EVM0002544,EVM0003038,EVM0001299,EVM0003315,EVM0017861,EVM0015209,EVM0020155,EVM0012415,EVM0009746,EVM0000371,EVM0009985,EVM0023258,EVM0010344,EVM0021111,EVM0023256,EVM0012769,EVM0027400,EVM0002361,EVM0007532,EVM0024696,EVM0018373,EVM0012594,EVM0010694,EVM0003092,EVM0019903,	0
black	Biological process	regulation of primary metabolic process	GO:0080090	5	0	4.28744	34	2202	40	11107	EVM0008118,EVM0025416,EVM0017196,EVM0013631,EVM0015814,EVM0000041,EVM0027188,EVM0027421,EVM0003237,EVM0002544,EVM0003038,EVM0001299,EVM0003315,EVM0017861,EVM0015209,EVM0020155,EVM0012415,EVM0009746,EVM0000371,EVM0009985,EVM0023258,EVM0010344,EVM0021111,EVM0023256,EVM0012769,EVM0027400,EVM0002361,EVM0007532,EVM0024696,EVM0018373,EVM0012594,EVM0010694,EVM0003092,EVM0019903,	0
black	Biological process	regulation of gene expression	GO:0010468	6	0	4.78507	34	1973	40	11107	EVM0008118,EVM0025416,EVM0017196,EVM0013631,EVM0015814,EVM0000041,EVM0027188,EVM0027421,EVM0003237,EVM0002544,EVM0003038,EVM0001299,EVM0003315,EVM0017861,EVM0015209,EVM0020155,EVM0012415,EVM0009746,EVM0000371,EVM0009985,EVM0023258,EVM0010344,EVM0021111,EVM0023256,EVM0012769,EVM0027400,EVM0002361,EVM0007532,EVM0024696,EVM0018373,EVM0012594,EVM0010694,EVM0003092,EVM0019903,	0
black	Biological process	regulation of RNA biosynthetic process	GO:2001141	8	0	5.83856	34	1617	40	11107	EVM0008118,EVM0025416,EVM0017196,EVM0013631,EVM0015814,EVM0000041,EVM0027188,EVM0027421,EVM0003237,EVM0002544,EVM0003038,EVM0001299,EVM0003315,EVM0017861,EVM0015209,EVM0020155,EVM0012415,EVM0009746,EVM0000371,EVM0009985,EVM0023258,EVM0010344,EVM0021111,EVM0023256,EVM0012769,EVM0027400,EVM0002361,EVM0007532,EVM0024696,EVM0018373,EVM0012594,EVM0010694,EVM0003092,EVM0019903,	0
black	Biological process	cellular nitrogen compound biosynthetic process	GO:0044271	5	0	3.72424	34	2535	40	11107	EVM0008118,EVM0025416,EVM0017196,EVM0013631,EVM0015814,EVM0000041,EVM0027188,EVM0027421,EVM0003237,EVM0002544,EVM0003038,EVM0001299,EVM0003315,EVM0017861,EVM0015209,EVM0020155,EVM0012415,EVM0009746,EVM0000371,EVM0009985,EVM0023258,EVM0010344,EVM0021111,EVM0023256,EVM0012769,EVM0027400,EVM0002361,EVM0007532,EVM0024696,EVM0018373,EVM0012594,EVM0010694,EVM0003092,EVM0019903,	0
black	Biological process	regulation of macromolecule biosynthetic process	GO:0010556	6	0	5.25958	34	1795	40	11107	EVM0008118,EVM0025416,EVM0017196,EVM0013631,EVM0015814,EVM0000041,EVM0027188,EVM0027421,EVM0003237,EVM0002544,EVM0003038,EVM0001299,EVM0003315,EVM0017861,EVM0015209,EVM0020155,EVM0012415,EVM0009746,EVM0000371,EVM0009985,EVM0023258,EVM0010344,EVM0021111,EVM0023256,EVM0012769,EVM0027400,EVM0002361,EVM0007532,EVM0024696,EVM0018373,EVM0012594,EVM0010694,EVM0003092,EVM0019903,	0
black	Biological process	nucleic acid-templated transcription	GO:0097659	9	0	5.57646	34	1693	40	11107	EVM0008118,EVM0025416,EVM0017196,EVM0013631,EVM0015814,EVM0000041,EVM0027188,EVM0027421,EVM0003237,EVM0002544,EVM0003038,EVM0001299,EVM0003315,EVM0017861,EVM0015209,EVM0020155,EVM0012415,EVM0009746,EVM0000371,EVM0009985,EVM0023258,EVM0010344,EVM0021111,EVM0023256,EVM0012769,EVM0027400,EVM0002361,EVM0007532,EVM0024696,EVM0018373,EVM0012594,EVM0010694,EVM0003092,EVM0019903,	0
black	Biological process	regulation of cellular metabolic process	GO:0031323	5	0	4.14987	34	2275	40	11107	EVM0008118,EVM0025416,EVM0017196,EVM0013631,EVM0015814,EVM0000041,EVM0027188,EVM0027421,EVM0003237,EVM0002544,EVM0003038,EVM0001299,EVM0003315,EVM0017861,EVM0015209,EVM0020155,EVM0012415,EVM0009746,EVM0000371,EVM0009985,EVM0023258,EVM0010344,EVM0021111,EVM0023256,EVM0012769,EVM0027400,EVM0002361,EVM0007532,EVM0024696,EVM0018373,EVM0012594,EVM0010694,EVM0003092,EVM0019903,	0
black	Biological process	regulation of cellular biosynthetic process	GO:0031326	6	0	5.05404	34	1868	40	11107	EVM0008118,EVM0025416,EVM0017196,EVM0013631,EVM0015814,EVM0000041,EVM0027188,EVM0027421,EVM0003237,EVM0002544,EVM0003038,EVM0001299,EVM0003315,EVM0017861,EVM0015209,EVM0020155,EVM0012415,EVM0009746,EVM0000371,EVM0009985,EVM0023258,EVM0010344,EVM0021111,EVM0023256,EVM0012769,EVM0027400,EVM0002361,EVM0007532,EVM0024696,EVM0018373,EVM0012594,EVM0010694,EVM0003092,EVM0019903,	0
black	Biological process	regulation of biosynthetic process	GO:0009889	5	0	4.95068	34	1907	40	11107	EVM0008118,EVM0025416,EVM0017196,EVM0013631,EVM0015814,EVM0000041,EVM0027188,EVM0027421,EVM0003237,EVM0002544,EVM0003038,EVM0001299,EVM0003315,EVM0017861,EVM0015209,EVM0020155,EVM0012415,EVM0009746,EVM0000371,EVM0009985,EVM0023258,EVM0010344,EVM0021111,EVM0023256,EVM0012769,EVM0027400,EVM0002361,EVM0007532,EVM0024696,EVM0018373,EVM0012594,EVM0010694,EVM0003092,EVM0019903,	0
black	Biological process	regulation of metabolic process	GO:0019222	4	0	3.74641	34	2520	40	11107	EVM0008118,EVM0025416,EVM0017196,EVM0013631,EVM0015814,EVM0000041,EVM0027188,EVM0027421,EVM0003237,EVM0002544,EVM0003038,EVM0001299,EVM0003315,EVM0017861,EVM0015209,EVM0020155,EVM0012415,EVM0009746,EVM0000371,EVM0009985,EVM0023258,EVM0010344,EVM0021111,EVM0023256,EVM0012769,EVM0027400,EVM0002361,EVM0007532,EVM0024696,EVM0018373,EVM0012594,EVM0010694,EVM0003092,EVM0019903,	0
black	Biological process	cellular macromolecule biosynthetic process	GO:0034645	6	0	3.83	34	2465	40	11107	EVM0008118,EVM0025416,EVM0017196,EVM0013631,EVM0015814,EVM0000041,EVM0027188,EVM0027421,EVM0003237,EVM0002544,EVM0003038,EVM0001299,EVM0003315,EVM0017861,EVM0015209,EVM0020155,EVM0012415,EVM0009746,EVM0000371,EVM0009985,EVM0023258,EVM0010344,EVM0021111,EVM0023256,EVM0012769,EVM0027400,EVM0002361,EVM0007532,EVM0024696,EVM0018373,EVM0012594,EVM0010694,EVM0003092,EVM0019903,	0
black	Biological process	regulation of macromolecule metabolic process	GO:0060255	5	0	4.09586	34	2305	40	11107	EVM0008118,EVM0025416,EVM0017196,EVM0013631,EVM0015814,EVM0000041,EVM0027188,EVM0027421,EVM0003237,EVM0002544,EVM0003038,EVM0001299,EVM0003315,EVM0017861,EVM0015209,EVM0020155,EVM0012415,EVM0009746,EVM0000371,EVM0009985,EVM0023258,EVM0010344,EVM0021111,EVM0023256,EVM0012769,EVM0027400,EVM0002361,EVM0007532,EVM0024696,EVM0018373,EVM0012594,EVM0010694,EVM0003092,EVM0019903,	0
black	Biological process	regulation of nucleic acid-templated transcription	GO:1903506	9	0	5.83856	34	1617	40	11107	EVM0008118,EVM0025416,EVM0017196,EVM0013631,EVM0015814,EVM0000041,EVM0027188,EVM0027421,EVM0003237,EVM0002544,EVM0003038,EVM0001299,EVM0003315,EVM0017861,EVM0015209,EVM0020155,EVM0012415,EVM0009746,EVM0000371,EVM0009985,EVM0023258,EVM0010344,EVM0021111,EVM0023256,EVM0012769,EVM0027400,EVM0002361,EVM0007532,EVM0024696,EVM0018373,EVM0012594,EVM0010694,EVM0003092,EVM0019903,	0
black	Biological process	regulation of nitrogen compound metabolic process	GO:0051171	5	0	4.37689	34	2157	40	11107	EVM0008118,EVM0025416,EVM0017196,EVM0013631,EVM0015814,EVM0000041,EVM0027188,EVM0027421,EVM0003237,EVM0002544,EVM0003038,EVM0001299,EVM0003315,EVM0017861,EVM0015209,EVM0020155,EVM0012415,EVM0009746,EVM0000371,EVM0009985,EVM0023258,EVM0010344,EVM0021111,EVM0023256,EVM0012769,EVM0027400,EVM0002361,EVM0007532,EVM0024696,EVM0018373,EVM0012594,EVM0010694,EVM0003092,EVM0019903,	0
black	Biological process	aromatic compound biosynthetic process	GO:0019438	5	0	4.20907	34	2243	40	11107	EVM0008118,EVM0025416,EVM0017196,EVM0013631,EVM0015814,EVM0000041,EVM0027188,EVM0027421,EVM0003237,EVM0002544,EVM0003038,EVM0001299,EVM0003315,EVM0017861,EVM0015209,EVM0020155,EVM0012415,EVM0009746,EVM0000371,EVM0009985,EVM0023258,EVM0010344,EVM0021111,EVM0023256,EVM0012769,EVM0027400,EVM0002361,EVM0007532,EVM0024696,EVM0018373,EVM0012594,EVM0010694,EVM0003092,EVM0019903,	0
black	Biological process	regulation of DNA-templated transcription	GO:0006355	10	1.11e-16	5.94518	34	1588	40	11107	EVM0008118,EVM0025416,EVM0017196,EVM0013631,EVM0015814,EVM0000041,EVM0027188,EVM0027421,EVM0003237,EVM0002544,EVM0003038,EVM0001299,EVM0003315,EVM0017861,EVM0015209,EVM0020155,EVM0012415,EVM0009746,EVM0000371,EVM0009985,EVM0023258,EVM0010344,EVM0021111,EVM0023256,EVM0012769,EVM0027400,EVM0002361,EVM0007532,EVM0024696,EVM0018373,EVM0012594,EVM0010694,EVM0003092,EVM0019903,	2.96e-15
black	Biological process	heterocycle biosynthetic process	GO:0018130	5	1.11e-16	4.36072	34	2165	40	11107	EVM0008118,EVM0025416,EVM0017196,EVM0013631,EVM0015814,EVM0000041,EVM0027188,EVM0027421,EVM0003237,EVM0002544,EVM0003038,EVM0001299,EVM0003315,EVM0017861,EVM0015209,EVM0020155,EVM0012415,EVM0009746,EVM0000371,EVM0009985,EVM0023258,EVM0010344,EVM0021111,EVM0023256,EVM0012769,EVM0027400,EVM0002361,EVM0007532,EVM0024696,EVM0018373,EVM0012594,EVM0010694,EVM0003092,EVM0019903,	2.96e-15
black	Biological process	regulation of nucleobase-containing compound metabolic process	GO:0019219	6	1.11e-16	5.15336	34	1832	40	11107	EVM0008118,EVM0025416,EVM0017196,EVM0013631,EVM0015814,EVM0000041,EVM0027188,EVM0027421,EVM0003237,EVM0002544,EVM0003038,EVM0001299,EVM0003315,EVM0017861,EVM0015209,EVM0020155,EVM0012415,EVM0009746,EVM0000371,EVM0009985,EVM0023258,EVM0010344,EVM0021111,EVM0023256,EVM0012769,EVM0027400,EVM0002361,EVM0007532,EVM0024696,EVM0018373,EVM0012594,EVM0010694,EVM0003092,EVM0019903,	2.96e-15
black	Biological process	organic cyclic compound biosynthetic process	GO:1901362	5	1.11e-16	4.03459	34	2340	40	11107	EVM0008118,EVM0025416,EVM0017196,EVM0013631,EVM0015814,EVM0000041,EVM0027188,EVM0027421,EVM0003237,EVM0002544,EVM0003038,EVM0001299,EVM0003315,EVM0017861,EVM0015209,EVM0020155,EVM0012415,EVM0009746,EVM0000371,EVM0009985,EVM0023258,EVM0010344,EVM0021111,EVM0023256,EVM0012769,EVM0027400,EVM0002361,EVM0007532,EVM0024696,EVM0018373,EVM0012594,EVM0010694,EVM0003092,EVM0019903,	2.96e-15
black	Biological process	DNA-templated transcription	GO:0006351	10	2.22e-16	5.66004	34	1668	40	11107	EVM0008118,EVM0025416,EVM0017196,EVM0013631,EVM0015814,EVM0000041,EVM0027188,EVM0027421,EVM0003237,EVM0002544,EVM0003038,EVM0001299,EVM0003315,EVM0017861,EVM0015209,EVM0020155,EVM0012415,EVM0009746,EVM0000371,EVM0009985,EVM0023258,EVM0010344,EVM0021111,EVM0023256,EVM0012769,EVM0027400,EVM0002361,EVM0007532,EVM0024696,EVM0018373,EVM0012594,EVM0010694,EVM0003092,EVM0019903,	4.84e-15
black	Biological process	regulation of cellular macromolecule biosynthetic process	GO:2000112	7	2.22e-16	5.37334	34	1757	40	11107	EVM0008118,EVM0025416,EVM0017196,EVM0013631,EVM0015814,EVM0000041,EVM0027188,EVM0027421,EVM0003237,EVM0002544,EVM0003038,EVM0001299,EVM0003315,EVM0017861,EVM0015209,EVM0020155,EVM0012415,EVM0009746,EVM0000371,EVM0009985,EVM0023258,EVM0010344,EVM0021111,EVM0023256,EVM0012769,EVM0027400,EVM0002361,EVM0007532,EVM0024696,EVM0018373,EVM0012594,EVM0010694,EVM0003092,EVM0019903,	4.84e-15
black	Biological process	nucleobase-containing compound biosynthetic process	GO:0034654	6	3.33e-16	4.81435	34	1961	40	11107	EVM0008118,EVM0025416,EVM0017196,EVM0013631,EVM0015814,EVM0000041,EVM0027188,EVM0027421,EVM0003237,EVM0002544,EVM0003038,EVM0001299,EVM0003315,EVM0017861,EVM0015209,EVM0020155,EVM0012415,EVM0009746,EVM0000371,EVM0009985,EVM0023258,EVM0010344,EVM0021111,EVM0023256,EVM0012769,EVM0027400,EVM0002361,EVM0007532,EVM0024696,EVM0018373,EVM0012594,EVM0010694,EVM0003092,EVM0019903,	6.66e-15
black	Biological process	macromolecule biosynthetic process	GO:0009059	5	4.44e-16	3.69653	34	2554	40	11107	EVM0008118,EVM0025416,EVM0017196,EVM0013631,EVM0015814,EVM0000041,EVM0027188,EVM0027421,EVM0003237,EVM0002544,EVM0003038,EVM0001299,EVM0003315,EVM0017861,EVM0015209,EVM0020155,EVM0012415,EVM0009746,EVM0000371,EVM0009985,EVM0023258,EVM0010344,EVM0021111,EVM0023256,EVM0012769,EVM0027400,EVM0002361,EVM0007532,EVM0024696,EVM0018373,EVM0012594,EVM0010694,EVM0003092,EVM0019903,	8.53e-15
black	Biological process	gene expression	GO:0010467	5	3.44e-15	3.3443	34	2823	40	11107	EVM0008118,EVM0025416,EVM0017196,EVM0013631,EVM0015814,EVM0000041,EVM0027188,EVM0027421,EVM0003237,EVM0002544,EVM0003038,EVM0001299,EVM0003315,EVM0017861,EVM0015209,EVM0020155,EVM0012415,EVM0009746,EVM0000371,EVM0009985,EVM0023258,EVM0010344,EVM0021111,EVM0023256,EVM0012769,EVM0027400,EVM0002361,EVM0007532,EVM0024696,EVM0018373,EVM0012594,EVM0010694,EVM0003092,EVM0019903,	6.35e-14
black	Biological process	RNA metabolic process	GO:0016070	7	7.77e-15	3.26112	34	2895	40	11107	EVM0008118,EVM0025416,EVM0017196,EVM0013631,EVM0015814,EVM0000041,EVM0027188,EVM0027421,EVM0003237,EVM0002544,EVM0003038,EVM0001299,EVM0003315,EVM0017861,EVM0015209,EVM0020155,EVM0012415,EVM0009746,EVM0000371,EVM0009985,EVM0023258,EVM0010344,EVM0021111,EVM0023256,EVM0012769,EVM0027400,EVM0002361,EVM0007532,EVM0024696,EVM0018373,EVM0012594,EVM0010694,EVM0003092,EVM0019903,	1.38e-13
black	Biological process	nucleic acid metabolic process	GO:0090304	6	3.49e-13	2.90045	34	3255	40	11107	EVM0008118,EVM0025416,EVM0017196,EVM0013631,EVM0015814,EVM0000041,EVM0027188,EVM0027421,EVM0003237,EVM0002544,EVM0003038,EVM0001299,EVM0003315,EVM0017861,EVM0015209,EVM0020155,EVM0012415,EVM0009746,EVM0000371,EVM0009985,EVM0023258,EVM0010344,EVM0021111,EVM0023256,EVM0012769,EVM0027400,EVM0002361,EVM0007532,EVM0024696,EVM0018373,EVM0012594,EVM0010694,EVM0003092,EVM0019903,	5.98e-12
black	Biological process	regulation of cellular process	GO:0050794	4	1.2e-12	2.5205	36	3966	40	11107	EVM0008118,EVM0025416,EVM0017196,EVM0013631,EVM0018729,EVM0015814,EVM0000041,EVM0027188,EVM0027421,EVM0003237,EVM0002544,EVM0003038,EVM0001299,EVM0003315,EVM0017861,EVM0015209,EVM0020155,EVM0012415,EVM0010558,EVM0009746,EVM0000371,EVM0009985,EVM0023258,EVM0010344,EVM0021111,EVM0023256,EVM0012769,EVM0027400,EVM0002361,EVM0007532,EVM0024696,EVM0018373,EVM0012594,EVM0010694,EVM0003092,EVM0019903,	1.99e-11
black	Biological process	cellular biosynthetic process	GO:0044249	4	4.79e-12	2.66995	34	3536	40	11107	EVM0008118,EVM0025416,EVM0017196,EVM0013631,EVM0015814,EVM0000041,EVM0027188,EVM0027421,EVM0003237,EVM0002544,EVM0003038,EVM0001299,EVM0003315,EVM0017861,EVM0015209,EVM0020155,EVM0012415,EVM0009746,EVM0000371,EVM0009985,EVM0023258,EVM0010344,EVM0021111,EVM0023256,EVM0012769,EVM0027400,EVM0002361,EVM0007532,EVM0024696,EVM0018373,EVM0012594,EVM0010694,EVM0003092,EVM0019903,	7.67e-11
black	Biological process	nucleobase-containing compound metabolic process	GO:0006139	5	4.97e-12	2.66694	34	3540	40	11107	EVM0008118,EVM0025416,EVM0017196,EVM0013631,EVM0015814,EVM0000041,EVM0027188,EVM0027421,EVM0003237,EVM0002544,EVM0003038,EVM0001299,EVM0003315,EVM0017861,EVM0015209,EVM0020155,EVM0012415,EVM0009746,EVM0000371,EVM0009985,EVM0023258,EVM0010344,EVM0021111,EVM0023256,EVM0012769,EVM0027400,EVM0002361,EVM0007532,EVM0024696,EVM0018373,EVM0012594,EVM0010694,EVM0003092,EVM0019903,	7.69e-11
black	Biological process	organic substance biosynthetic process	GO:1901576	4	1.22e-11	2.59153	34	3643	40	11107	EVM0008118,EVM0025416,EVM0017196,EVM0013631,EVM0015814,EVM0000041,EVM0027188,EVM0027421,EVM0003237,EVM0002544,EVM0003038,EVM0001299,EVM0003315,EVM0017861,EVM0015209,EVM0020155,EVM0012415,EVM0009746,EVM0000371,EVM0009985,EVM0023258,EVM0010344,EVM0021111,EVM0023256,EVM0012769,EVM0027400,EVM0002361,EVM0007532,EVM0024696,EVM0018373,EVM0012594,EVM0010694,EVM0003092,EVM0019903,	1.83e-10
black	Biological process	biosynthetic process	GO:0009058	3	3.51e-11	2.50556	34	3768	40	11107	EVM0008118,EVM0025416,EVM0017196,EVM0013631,EVM0015814,EVM0000041,EVM0027188,EVM0027421,EVM0003237,EVM0002544,EVM0003038,EVM0001299,EVM0003315,EVM0017861,EVM0015209,EVM0020155,EVM0012415,EVM0009746,EVM0000371,EVM0009985,EVM0023258,EVM0010344,EVM0021111,EVM0023256,EVM0012769,EVM0027400,EVM0002361,EVM0007532,EVM0024696,EVM0018373,EVM0012594,EVM0010694,EVM0003092,EVM0019903,	5.11e-10
black	Biological process	regulation of biological process	GO:0050789	3	4.01e-11	2.2724	36	4399	40	11107	EVM0008118,EVM0025416,EVM0017196,EVM0013631,EVM0018729,EVM0015814,EVM0000041,EVM0027188,EVM0027421,EVM0003237,EVM0002544,EVM0003038,EVM0001299,EVM0003315,EVM0017861,EVM0015209,EVM0020155,EVM0012415,EVM0010558,EVM0009746,EVM0000371,EVM0009985,EVM0023258,EVM0010344,EVM0021111,EVM0023256,EVM0012769,EVM0027400,EVM0002361,EVM0007532,EVM0024696,EVM0018373,EVM0012594,EVM0010694,EVM0003092,EVM0019903,	5.66e-10
black	Biological process	heterocycle metabolic process	GO:0046483	4	4.32e-11	2.48905	34	3793	40	11107	EVM0008118,EVM0025416,EVM0017196,EVM0013631,EVM0015814,EVM0000041,EVM0027188,EVM0027421,EVM0003237,EVM0002544,EVM0003038,EVM0001299,EVM0003315,EVM0017861,EVM0015209,EVM0020155,EVM0012415,EVM0009746,EVM0000371,EVM0009985,EVM0023258,EVM0010344,EVM0021111,EVM0023256,EVM0012769,EVM0027400,EVM0002361,EVM0007532,EVM0024696,EVM0018373,EVM0012594,EVM0010694,EVM0003092,EVM0019903,	5.92e-10
black	Biological process	cellular aromatic compound metabolic process	GO:0006725	4	1.16e-10	2.41087	34	3916	40	11107	EVM0008118,EVM0025416,EVM0017196,EVM0013631,EVM0015814,EVM0000041,EVM0027188,EVM0027421,EVM0003237,EVM0002544,EVM0003038,EVM0001299,EVM0003315,EVM0017861,EVM0015209,EVM0020155,EVM0012415,EVM0009746,EVM0000371,EVM0009985,EVM0023258,EVM0010344,EVM0021111,EVM0023256,EVM0012769,EVM0027400,EVM0002361,EVM0007532,EVM0024696,EVM0018373,EVM0012594,EVM0010694,EVM0003092,EVM0019903,	1.55e-09
black	Biological process	organic cyclic compound metabolic process	GO:1901360	4	2.62e-10	2.3485	34	4020	40	11107	EVM0008118,EVM0025416,EVM0017196,EVM0013631,EVM0015814,EVM0000041,EVM0027188,EVM0027421,EVM0003237,EVM0002544,EVM0003038,EVM0001299,EVM0003315,EVM0017861,EVM0015209,EVM0020155,EVM0012415,EVM0009746,EVM0000371,EVM0009985,EVM0023258,EVM0010344,EVM0021111,EVM0023256,EVM0012769,EVM0027400,EVM0002361,EVM0007532,EVM0024696,EVM0018373,EVM0012594,EVM0010694,EVM0003092,EVM0019903,	3.4e-09
black	Biological process	cellular nitrogen compound metabolic process	GO:0034641	4	4.54e-10	2.30717	34	4092	40	11107	EVM0008118,EVM0025416,EVM0017196,EVM0013631,EVM0015814,EVM0000041,EVM0027188,EVM0027421,EVM0003237,EVM0002544,EVM0003038,EVM0001299,EVM0003315,EVM0017861,EVM0015209,EVM0020155,EVM0012415,EVM0009746,EVM0000371,EVM0009985,EVM0023258,EVM0010344,EVM0021111,EVM0023256,EVM0012769,EVM0027400,EVM0002361,EVM0007532,EVM0024696,EVM0018373,EVM0012594,EVM0010694,EVM0003092,EVM0019903,	5.73e-09
black	Biological process	biological regulation	GO:0065007	2	1.73e-09	2.03012	36	4924	40	11107	EVM0008118,EVM0025416,EVM0017196,EVM0013631,EVM0018729,EVM0015814,EVM0000041,EVM0027188,EVM0027421,EVM0003237,EVM0002544,EVM0003038,EVM0001299,EVM0003315,EVM0017861,EVM0015209,EVM0020155,EVM0012415,EVM0010558,EVM0009746,EVM0000371,EVM0009985,EVM0023258,EVM0010344,EVM0021111,EVM0023256,EVM0012769,EVM0027400,EVM0002361,EVM0007532,EVM0024696,EVM0018373,EVM0012594,EVM0010694,EVM0003092,EVM0019903,	2.13e-08
black	Biological process	cellular macromolecule metabolic process	GO:0044260	5	3.49e-09	2.15842	34	4374	40	11107	EVM0008118,EVM0025416,EVM0017196,EVM0013631,EVM0015814,EVM0000041,EVM0027188,EVM0027421,EVM0003237,EVM0002544,EVM0003038,EVM0001299,EVM0003315,EVM0017861,EVM0015209,EVM0020155,EVM0012415,EVM0009746,EVM0000371,EVM0009985,EVM0023258,EVM0010344,EVM0021111,EVM0023256,EVM0012769,EVM0027400,EVM0002361,EVM0007532,EVM0024696,EVM0018373,EVM0012594,EVM0010694,EVM0003092,EVM0019903,	4.19e-08
black	Biological process	macromolecule metabolic process	GO:0043170	4	5.15e-06	1.68558	34	5601	40	11107	EVM0008118,EVM0025416,EVM0017196,EVM0013631,EVM0015814,EVM0000041,EVM0027188,EVM0027421,EVM0003237,EVM0002544,EVM0003038,EVM0001299,EVM0003315,EVM0017861,EVM0015209,EVM0020155,EVM0012415,EVM0009746,EVM0000371,EVM0009985,EVM0023258,EVM0010344,EVM0021111,EVM0023256,EVM0012769,EVM0027400,EVM0002361,EVM0007532,EVM0024696,EVM0018373,EVM0012594,EVM0010694,EVM0003092,EVM0019903,	6.03e-05
black	Biological process	nitrogen compound metabolic process	GO:0006807	3	3.71e-05	1.57061	34	6011	40	11107	EVM0008118,EVM0025416,EVM0017196,EVM0013631,EVM0015814,EVM0000041,EVM0027188,EVM0027421,EVM0003237,EVM0002544,EVM0003038,EVM0001299,EVM0003315,EVM0017861,EVM0015209,EVM0020155,EVM0012415,EVM0009746,EVM0000371,EVM0009985,EVM0023258,EVM0010344,EVM0021111,EVM0023256,EVM0012769,EVM0027400,EVM0002361,EVM0007532,EVM0024696,EVM0018373,EVM0012594,EVM0010694,EVM0003092,EVM0019903,	0.00042406
black	Biological process	cell population proliferation	GO:0008283	3	0.000319815	8.26414	5	168	40	11107	EVM0003237,EVM0010558,EVM0009985,EVM0023258,EVM0003092,	0.00357003
black	Biological process	positive regulation of RNA metabolic process	GO:0051254	8	0.000440443	4.28015	8	519	40	11107	EVM0025416,EVM0002544,EVM0003315,EVM0009985,EVM0002361,EVM0007532,EVM0018373,EVM0012594,	0.00469805
black	Biological process	primary metabolic process	GO:0044238	3	0.000556861	1.41926	34	6652	40	11107	EVM0008118,EVM0025416,EVM0017196,EVM0013631,EVM0015814,EVM0000041,EVM0027188,EVM0027421,EVM0003237,EVM0002544,EVM0003038,EVM0001299,EVM0003315,EVM0017861,EVM0015209,EVM0020155,EVM0012415,EVM0009746,EVM0000371,EVM0009985,EVM0023258,EVM0010344,EVM0021111,EVM0023256,EVM0012769,EVM0027400,EVM0002361,EVM0007532,EVM0024696,EVM0018373,EVM0012594,EVM0010694,EVM0003092,EVM0019903,	0.0056871
black	Biological process	positive regulation of biosynthetic process	GO:0009891	6	0.000671475	4.017	8	553	40	11107	EVM0025416,EVM0002544,EVM0020155,EVM0009985,EVM0002361,EVM0007532,EVM0018373,EVM0012594,	0.00671475
black	Biological process	positive regulation of nucleobase-containing compound metabolic process	GO:0045935	7	0.000712516	3.981	8	558	40	11107	EVM0025416,EVM0002544,EVM0003315,EVM0009985,EVM0002361,EVM0007532,EVM0018373,EVM0012594,	0.00697975
black	Biological process	positive regulation of DNA-templated transcription	GO:0045893	11	0.000753554	4.53083	7	429	40	11107	EVM0025416,EVM0002544,EVM0009985,EVM0002361,EVM0007532,EVM0018373,EVM0012594,	0.00723412
black	Biological process	positive regulation of RNA biosynthetic process	GO:1902680	9	0.00101148	4.30981	7	451	40	11107	EVM0025416,EVM0002544,EVM0009985,EVM0002361,EVM0007532,EVM0018373,EVM0012594,	0.00933675
black	Biological process	positive regulation of nucleic acid-templated transcription	GO:1903508	10	0.00101148	4.30981	7	451	40	11107	EVM0025416,EVM0002544,EVM0009985,EVM0002361,EVM0007532,EVM0018373,EVM0012594,	0.00933675
black	Biological process	positive regulation of macromolecule biosynthetic process	GO:0010557	7	0.00205741	3.81123	7	510	40	11107	EVM0025416,EVM0002544,EVM0009985,EVM0002361,EVM0007532,EVM0018373,EVM0012594,	0.0179556
black	Biological process	positive regulation of cellular biosynthetic process	GO:0031328	7	0.00253122	3.67434	7	529	40	11107	EVM0025416,EVM0002544,EVM0009985,EVM0002361,EVM0007532,EVM0018373,EVM0012594,	0.0216961
black	Biological process	cellular metabolic process	GO:0044237	3	0.00260911	1.33498	34	7072	40	11107	EVM0008118,EVM0025416,EVM0017196,EVM0013631,EVM0015814,EVM0000041,EVM0027188,EVM0027421,EVM0003237,EVM0002544,EVM0003038,EVM0001299,EVM0003315,EVM0017861,EVM0015209,EVM0020155,EVM0012415,EVM0009746,EVM0000371,EVM0009985,EVM0023258,EVM0010344,EVM0021111,EVM0023256,EVM0012769,EVM0027400,EVM0002361,EVM0007532,EVM0024696,EVM0018373,EVM0012594,EVM0010694,EVM0003092,EVM0019903,	0.0215927
black	Biological process	positive regulation of gene expression	GO:0010628	7	0.00261318	3.65362	7	532	40	11107	EVM0025416,EVM0002544,EVM0009985,EVM0002361,EVM0007532,EVM0018373,EVM0012594,	0.0212598
black	Biological process	organic substance metabolic process	GO:0071704	3	0.00261818	1.33479	34	7073	40	11107	EVM0008118,EVM0025416,EVM0017196,EVM0013631,EVM0015814,EVM0000041,EVM0027188,EVM0027421,EVM0003237,EVM0002544,EVM0003038,EVM0001299,EVM0003315,EVM0017861,EVM0015209,EVM0020155,EVM0012415,EVM0009746,EVM0000371,EVM0009985,EVM0023258,EVM0010344,EVM0021111,EVM0023256,EVM0012769,EVM0027400,EVM0002361,EVM0007532,EVM0024696,EVM0018373,EVM0012594,EVM0010694,EVM0003092,EVM0019903,	0.0209455
black	Biological process	shoot system development	GO:0048367	5	0.00276158	2.93319	9	852	40	11107	EVM0025416,EVM0015814,EVM0003237,EVM0001299,EVM0016450,EVM0010558,EVM0023258,EVM0024696,EVM0012594,	0.0217304
black	Biological process	positive regulation of metabolic process	GO:0009893	5	0.00282839	2.92289	9	855	40	11107	EVM0025416,EVM0002544,EVM0003315,EVM0020155,EVM0009985,EVM0002361,EVM0007532,EVM0018373,EVM0012594,	0.0218972
black	Biological process	positive regulation of nitrogen compound metabolic process	GO:0051173	6	0.00352171	3.09819	8	717	40	11107	EVM0025416,EVM0002544,EVM0003315,EVM0009985,EVM0002361,EVM0007532,EVM0018373,EVM0012594,	0.0264128
black	Biological process	meristem development	GO:0048507	5	0.00471285	4.50771	5	308	40	11107	EVM0025416,EVM0018729,EVM0024696,EVM0018373,EVM0003092,	0.0318615
black	Biological process	positive regulation of cellular metabolic process	GO:0031325	6	0.0048239	2.94225	8	755	40	11107	EVM0025416,EVM0002544,EVM0003315,EVM0009985,EVM0002361,EVM0007532,EVM0018373,EVM0012594,	0.0321593
black	Biological process	positive regulation of macromolecule metabolic process	GO:0010604	6	0.00564503	2.86632	8	775	40	11107	EVM0025416,EVM0002544,EVM0003315,EVM0009985,EVM0002361,EVM0007532,EVM0018373,EVM0012594,	0.0361282
black	Biological process	regulation of transcription by RNA polymerase II	GO:0006357	11	0.00613728	4.23285	5	328	40	11107	EVM0025416,EVM0027421,EVM0009985,EVM0021111,EVM0012769,	0.0387618
black	Biological process	positive regulation of biological process	GO:0048518	4	0.00749439	2.22788	11	1371	40	11107	EVM0025416,EVM0002544,EVM0003038,EVM0003315,EVM0020155,EVM0009985,EVM0010344,EVM0002361,EVM0007532,EVM0018373,EVM0012594,	0.0444112
black	Biological process	leaf development	GO:0048366	6	0.0102989	3.73219	5	372	40	11107	EVM0015814,EVM0016450,EVM0010558,EVM0023258,EVM0012594,	0.0581587
black	Biological process	transcription by RNA polymerase II	GO:0006366	11	0.0109874	3.67295	5	378	40	11107	EVM0025416,EVM0027421,EVM0009985,EVM0021111,EVM0012769,	0.0592578
black	Biological process	embryo development ending in seed dormancy	GO:0009793	6	0.0122043	3.57829	5	388	40	11107	EVM0025416,EVM0018729,EVM0015814,EVM0024696,EVM0018373,	0.0643743
black	Biological process	developmental process	GO:0032502	2	0.0124155	1.64467	18	3039	40	11107	EVM0025416,EVM0018729,EVM0015814,EVM0003237,EVM0001299,EVM0016450,EVM0020155,EVM0010558,EVM0009985,EVM0023258,EVM0023256,EVM0012769,EVM0027400,EVM0007532,EVM0024696,EVM0018373,EVM0012594,EVM0003092,	0.0647767
black	Biological process	positive regulation of cellular process	GO:0048522	5	0.0129034	2.31396	9	1080	40	11107	EVM0025416,EVM0002544,EVM0003038,EVM0003315,EVM0009985,EVM0002361,EVM0007532,EVM0018373,EVM0012594,	0.066598
black	Biological process	tissue development	GO:0009888	4	0.0152296	2.63021	7	739	40	11107	EVM0025416,EVM0018729,EVM0020155,EVM0024696,EVM0018373,EVM0012594,EVM0003092,	0.0683198
black	Biological process	reproductive system development	GO:0061458	5	0.0192941	2.16558	9	1154	40	11107	EVM0025416,EVM0018729,EVM0015814,EVM0003237,EVM0023258,EVM0023256,EVM0024696,EVM0018373,EVM0012594,	0.0826889
black	Biological process	reproductive structure development	GO:0048608	4	0.0192941	2.16558	9	1154	40	11107	EVM0025416,EVM0018729,EVM0015814,EVM0003237,EVM0023258,EVM0023256,EVM0024696,EVM0018373,EVM0012594,	0.0826889
black	Biological process	seed development	GO:0048316	5	0.0201336	2.7538	6	605	40	11107	EVM0025416,EVM0018729,EVM0015814,EVM0023256,EVM0024696,EVM0018373,	0.0847731
black	Biological process	metabolic process	GO:0008152	2	0.0208907	1.22102	34	7732	40	11107	EVM0008118,EVM0025416,EVM0017196,EVM0013631,EVM0015814,EVM0000041,EVM0027188,EVM0027421,EVM0003237,EVM0002544,EVM0003038,EVM0001299,EVM0003315,EVM0017861,EVM0015209,EVM0020155,EVM0012415,EVM0009746,EVM0000371,EVM0009985,EVM0023258,EVM0010344,EVM0021111,EVM0023256,EVM0012769,EVM0027400,EVM0002361,EVM0007532,EVM0024696,EVM0018373,EVM0012594,EVM0010694,EVM0003092,EVM0019903,	0.0871961
black	Biological process	embryo development	GO:0009790	5	0.0218515	3.08528	5	450	40	11107	EVM0025416,EVM0018729,EVM0015814,EVM0024696,EVM0018373,	0.0888875
black	Biological process	fruit development	GO:0010154	5	0.0242187	2.64033	6	631	40	11107	EVM0025416,EVM0018729,EVM0015814,EVM0023256,EVM0024696,EVM0018373,	0.0937497
black	Biological process	cellular response to endogenous stimulus	GO:0071495	4	0.0275161	2.3334	7	833	40	11107	EVM0017196,EVM0003038,EVM0020155,EVM0009985,EVM0024696,EVM0012594,EVM0019903,	0.105662
black	Biological process	system development	GO:0048731	4	0.0294887	1.76769	12	1885	40	11107	EVM0025416,EVM0018729,EVM0015814,EVM0003237,EVM0001299,EVM0016450,EVM0010558,EVM0023258,EVM0023256,EVM0024696,EVM0018373,EVM0012594,	0.111453
black	Biological process	hormone-mediated signaling pathway	GO:0009755	6	0.0309545	2.49409	6	668	40	11107	EVM0017196,EVM0003038,EVM0020155,EVM0024696,EVM0012594,EVM0019903,	0.115179
black	Biological process	phyllome development	GO:0048827	5	0.0417167	2.59509	5	535	40	11107	EVM0015814,EVM0016450,EVM0010558,EVM0023258,EVM0012594,	0.144058
black	Biological process	post-embryonic development	GO:0009791	3	0.0427027	1.80191	10	1541	40	11107	EVM0025416,EVM0018729,EVM0015814,EVM0003237,EVM0010558,EVM0023258,EVM0023256,EVM0024696,EVM0018373,EVM0012594,	0.146409
black	Biological process	reproductive process	GO:0022414	2	0.0443661	1.7903	10	1551	40	11107	EVM0025416,EVM0018729,EVM0015814,EVM0003237,EVM0012415,EVM0023258,EVM0023256,EVM0024696,EVM0018373,EVM0012594,	0.148921
black	Biological process	reproduction	GO:0000003	2	0.0459018	1.77997	10	1560	40	11107	EVM0025416,EVM0018729,EVM0015814,EVM0003237,EVM0012415,EVM0023258,EVM0023256,EVM0024696,EVM0018373,EVM0012594,	0.15091
blue	Molecular function	sequence-specific DNA binding	GO:0043565	6	7.04e-14	11.6804	14	625	18	9386	EVM0016128,EVM0012245,EVM0012446,EVM0008354,EVM0001180,EVM0024475,EVM0004829,EVM0016470,EVM0019803,EVM0013982,EVM0011684,EVM0020156,EVM0019524,EVM0028075,	2.96e-12
blue	Molecular function	DNA-binding transcription factor activity	GO:0003700	3	2.68e-13	7.2802	16	1146	18	9386	EVM0016128,EVM0012245,EVM0012446,EVM0008354,EVM0001180,EVM0008869,EVM0024475,EVM0001715,EVM0004829,EVM0016470,EVM0019803,EVM0013982,EVM0011684,EVM0020156,EVM0019524,EVM0028075,	5.62e-12
blue	Molecular function	transcription regulator activity	GO:0140110	2	7.3e-13	6.83301	16	1221	18	9386	EVM0016128,EVM0012245,EVM0012446,EVM0008354,EVM0001180,EVM0008869,EVM0024475,EVM0001715,EVM0004829,EVM0016470,EVM0019803,EVM0013982,EVM0011684,EVM0020156,EVM0019524,EVM0028075,	1.02e-11
blue	Molecular function	DNA binding	GO:0003677	5	2.78e-11	7.565	14	965	18	9386	EVM0016128,EVM0012245,EVM0012446,EVM0008354,EVM0001180,EVM0024475,EVM0004829,EVM0016470,EVM0019803,EVM0013982,EVM0011684,EVM0020156,EVM0019524,EVM0028075,	2.92e-10
blue	Molecular function	nucleic acid binding	GO:0003676	4	6.24e-08	3.7496	15	2086	18	9386	EVM0016128,EVM0012245,EVM0012446,EVM0008354,EVM0001180,EVM0027983,EVM0024475,EVM0004829,EVM0016470,EVM0019803,EVM0013982,EVM0011684,EVM0020156,EVM0019524,EVM0028075,	5.24e-07
blue	Molecular function	DNA-binding transcription factor activity, RNA polymerase II-specific	GO:0000981	4	2.48e-07	20.7196	6	151	18	9386	EVM0012245,EVM0012446,EVM0008354,EVM0001180,EVM0016470,EVM0019524,	1.74e-06
blue	Molecular function	heterocyclic compound binding	GO:1901363	3	5.06e-07	3.23477	15	2418	18	9386	EVM0016128,EVM0012245,EVM0012446,EVM0008354,EVM0001180,EVM0027983,EVM0024475,EVM0004829,EVM0016470,EVM0019803,EVM0013982,EVM0011684,EVM0020156,EVM0019524,EVM0028075,	3.04e-06
blue	Molecular function	organic cyclic compound binding	GO:0097159	3	5.31e-07	3.2241	15	2426	18	9386	EVM0016128,EVM0012245,EVM0012446,EVM0008354,EVM0001180,EVM0027983,EVM0024475,EVM0004829,EVM0016470,EVM0019803,EVM0013982,EVM0011684,EVM0020156,EVM0019524,EVM0028075,	2.79e-06
blue	Molecular function	transcription cis-regulatory region binding	GO:0000976	8	1.63e-06	10.8312	7	337	18	9386	EVM0012245,EVM0012446,EVM0008354,EVM0001180,EVM0016470,EVM0019803,EVM0019524,	7.63e-06
blue	Molecular function	transcription regulatory region nucleic acid binding	GO:0001067	5	1.63e-06	10.8312	7	337	18	9386	EVM0012245,EVM0012446,EVM0008354,EVM0001180,EVM0016470,EVM0019803,EVM0019524,	7.63e-06
blue	Molecular function	sequence-specific double-stranded DNA binding	GO:1990837	7	2.95e-06	9.91878	7	368	18	9386	EVM0012245,EVM0012446,EVM0008354,EVM0001180,EVM0016470,EVM0019803,EVM0019524,	1.12e-05
blue	Molecular function	double-stranded DNA binding	GO:0003690	6	1.18e-05	8.03989	7	454	18	9386	EVM0012245,EVM0012446,EVM0008354,EVM0001180,EVM0016470,EVM0019803,EVM0019524,	4.14e-05
blue	Molecular function	binding	GO:0005488	2	0.000210333	1.92282	16	4339	18	9386	EVM0016128,EVM0012245,EVM0012446,EVM0008354,EVM0014726,EVM0001180,EVM0027983,EVM0024475,EVM0004829,EVM0016470,EVM0019803,EVM0013982,EVM0011684,EVM0020156,EVM0019524,EVM0028075,	0.000490777
blue	Cellular component	nucleus	GO:0005634	6	6.91e-09	3.23144	16	3448	16	11142	EVM0016128,EVM0012245,EVM0012446,EVM0008354,EVM0014726,EVM0001180,EVM0027983,EVM0001715,EVM0004829,EVM0016470,EVM0019803,EVM0013982,EVM0011684,EVM0020156,EVM0019524,EVM0028075,	2.69e-07
blue	Cellular component	intracellular membrane-bounded organelle	GO:0043231	5	0.00395591	1.4127	16	7887	16	11142	EVM0016128,EVM0012245,EVM0012446,EVM0008354,EVM0014726,EVM0001180,EVM0027983,EVM0001715,EVM0004829,EVM0016470,EVM0019803,EVM0013982,EVM0011684,EVM0020156,EVM0019524,EVM0028075,	0.0771403
blue	Cellular component	membrane-bounded organelle	GO:0043227	4	0.00421241	1.40717	16	7918	16	11142	EVM0016128,EVM0012245,EVM0012446,EVM0008354,EVM0014726,EVM0001180,EVM0027983,EVM0001715,EVM0004829,EVM0016470,EVM0019803,EVM0013982,EVM0011684,EVM0020156,EVM0019524,EVM0028075,	0.0547614
blue	Cellular component	intracellular organelle	GO:0043229	4	0.00715068	1.36144	16	8184	16	11142	EVM0016128,EVM0012245,EVM0012446,EVM0008354,EVM0014726,EVM0001180,EVM0027983,EVM0001715,EVM0004829,EVM0016470,EVM0019803,EVM0013982,EVM0011684,EVM0020156,EVM0019524,EVM0028075,	0.0697191
blue	Cellular component	organelle	GO:0043226	3	0.00750863	1.35729	16	8209	16	11142	EVM0016128,EVM0012245,EVM0012446,EVM0008354,EVM0014726,EVM0001180,EVM0027983,EVM0001715,EVM0004829,EVM0016470,EVM0019803,EVM0013982,EVM0011684,EVM0020156,EVM0019524,EVM0028075,	0.0585673
blue	Biological process	regulation of DNA-templated transcription	GO:0006355	10	9.99e-15	6.62621	18	1588	19	11107	EVM0016128,EVM0012245,EVM0012446,EVM0008354,EVM0006170,EVM0014726,EVM0001180,EVM0008869,EVM0024475,EVM0001715,EVM0004829,EVM0016470,EVM0019803,EVM0013982,EVM0011684,EVM0020156,EVM0019524,EVM0028075,	3.72e-12
blue	Biological process	regulation of RNA biosynthetic process	GO:2001141	8	1.33e-14	6.50737	18	1617	19	11107	EVM0016128,EVM0012245,EVM0012446,EVM0008354,EVM0006170,EVM0014726,EVM0001180,EVM0008869,EVM0024475,EVM0001715,EVM0004829,EVM0016470,EVM0019803,EVM0013982,EVM0011684,EVM0020156,EVM0019524,EVM0028075,	2.48e-12
blue	Biological process	regulation of nucleic acid-templated transcription	GO:1903506	9	1.33e-14	6.50737	18	1617	19	11107	EVM0016128,EVM0012245,EVM0012446,EVM0008354,EVM0006170,EVM0014726,EVM0001180,EVM0008869,EVM0024475,EVM0001715,EVM0004829,EVM0016470,EVM0019803,EVM0013982,EVM0011684,EVM0020156,EVM0019524,EVM0028075,	2.48e-12
blue	Biological process	DNA-templated transcription	GO:0006351	10	2.33e-14	6.30841	18	1668	19	11107	EVM0016128,EVM0012245,EVM0012446,EVM0008354,EVM0006170,EVM0014726,EVM0001180,EVM0008869,EVM0024475,EVM0001715,EVM0004829,EVM0016470,EVM0019803,EVM0013982,EVM0011684,EVM0020156,EVM0019524,EVM0028075,	2.17e-12
blue	Biological process	nucleic acid-templated transcription	GO:0097659	9	3.03e-14	6.21525	18	1693	19	11107	EVM0016128,EVM0012245,EVM0012446,EVM0008354,EVM0006170,EVM0014726,EVM0001180,EVM0008869,EVM0024475,EVM0001715,EVM0004829,EVM0016470,EVM0019803,EVM0013982,EVM0011684,EVM0020156,EVM0019524,EVM0028075,	2.25e-12
blue	Biological process	RNA biosynthetic process	GO:0032774	8	3.45e-14	6.16428	18	1707	19	11107	EVM0016128,EVM0012245,EVM0012446,EVM0008354,EVM0006170,EVM0014726,EVM0001180,EVM0008869,EVM0024475,EVM0001715,EVM0004829,EVM0016470,EVM0019803,EVM0013982,EVM0011684,EVM0020156,EVM0019524,EVM0028075,	2.14e-12
blue	Biological process	regulation of RNA metabolic process	GO:0051252	7	4.5e-14	6.0753	18	1732	19	11107	EVM0016128,EVM0012245,EVM0012446,EVM0008354,EVM0006170,EVM0014726,EVM0001180,EVM0008869,EVM0024475,EVM0001715,EVM0004829,EVM0016470,EVM0019803,EVM0013982,EVM0011684,EVM0020156,EVM0019524,EVM0028075,	2.39e-12
blue	Biological process	regulation of cellular macromolecule biosynthetic process	GO:2000112	7	5.77e-14	5.98886	18	1757	19	11107	EVM0016128,EVM0012245,EVM0012446,EVM0008354,EVM0006170,EVM0014726,EVM0001180,EVM0008869,EVM0024475,EVM0001715,EVM0004829,EVM0016470,EVM0019803,EVM0013982,EVM0011684,EVM0020156,EVM0019524,EVM0028075,	2.68e-12
blue	Biological process	regulation of macromolecule biosynthetic process	GO:0010556	6	8.53e-14	5.86207	18	1795	19	11107	EVM0016128,EVM0012245,EVM0012446,EVM0008354,EVM0006170,EVM0014726,EVM0001180,EVM0008869,EVM0024475,EVM0001715,EVM0004829,EVM0016470,EVM0019803,EVM0013982,EVM0011684,EVM0020156,EVM0019524,EVM0028075,	3.52e-12
blue	Biological process	regulation of nucleobase-containing compound metabolic process	GO:0019219	6	1.22e-13	5.74368	18	1832	19	11107	EVM0016128,EVM0012245,EVM0012446,EVM0008354,EVM0006170,EVM0014726,EVM0001180,EVM0008869,EVM0024475,EVM0001715,EVM0004829,EVM0016470,EVM0019803,EVM0013982,EVM0011684,EVM0020156,EVM0019524,EVM0028075,	4.56e-12
blue	Biological process	regulation of cellular biosynthetic process	GO:0031326	6	1.73e-13	5.63299	18	1868	19	11107	EVM0016128,EVM0012245,EVM0012446,EVM0008354,EVM0006170,EVM0014726,EVM0001180,EVM0008869,EVM0024475,EVM0001715,EVM0004829,EVM0016470,EVM0019803,EVM0013982,EVM0011684,EVM0020156,EVM0019524,EVM0028075,	5.86e-12
blue	Biological process	regulation of biosynthetic process	GO:0009889	5	2.51e-13	5.51779	18	1907	19	11107	EVM0016128,EVM0012245,EVM0012446,EVM0008354,EVM0006170,EVM0014726,EVM0001180,EVM0008869,EVM0024475,EVM0001715,EVM0004829,EVM0016470,EVM0019803,EVM0013982,EVM0011684,EVM0020156,EVM0019524,EVM0028075,	7.78e-12
blue	Biological process	nucleobase-containing compound biosynthetic process	GO:0034654	6	4.13e-13	5.36584	18	1961	19	11107	EVM0016128,EVM0012245,EVM0012446,EVM0008354,EVM0006170,EVM0014726,EVM0001180,EVM0008869,EVM0024475,EVM0001715,EVM0004829,EVM0016470,EVM0019803,EVM0013982,EVM0011684,EVM0020156,EVM0019524,EVM0028075,	1.18e-11
blue	Biological process	regulation of gene expression	GO:0010468	6	4.61e-13	5.33321	18	1973	19	11107	EVM0016128,EVM0012245,EVM0012446,EVM0008354,EVM0006170,EVM0014726,EVM0001180,EVM0008869,EVM0024475,EVM0001715,EVM0004829,EVM0016470,EVM0019803,EVM0013982,EVM0011684,EVM0020156,EVM0019524,EVM0028075,	1.22e-11
blue	Biological process	regulation of nitrogen compound metabolic process	GO:0051171	5	2.26e-12	4.87827	18	2157	19	11107	EVM0016128,EVM0012245,EVM0012446,EVM0008354,EVM0006170,EVM0014726,EVM0001180,EVM0008869,EVM0024475,EVM0001715,EVM0004829,EVM0016470,EVM0019803,EVM0013982,EVM0011684,EVM0020156,EVM0019524,EVM0028075,	5.61e-11
blue	Biological process	heterocycle biosynthetic process	GO:0018130	5	2.42e-12	4.86024	18	2165	19	11107	EVM0016128,EVM0012245,EVM0012446,EVM0008354,EVM0006170,EVM0014726,EVM0001180,EVM0008869,EVM0024475,EVM0001715,EVM0004829,EVM0016470,EVM0019803,EVM0013982,EVM0011684,EVM0020156,EVM0019524,EVM0028075,	5.62e-11
blue	Biological process	regulation of primary metabolic process	GO:0080090	5	3.27e-12	4.77857	18	2202	19	11107	EVM0016128,EVM0012245,EVM0012446,EVM0008354,EVM0006170,EVM0014726,EVM0001180,EVM0008869,EVM0024475,EVM0001715,EVM0004829,EVM0016470,EVM0019803,EVM0013982,EVM0011684,EVM0020156,EVM0019524,EVM0028075,	7.16e-11
blue	Biological process	aromatic compound biosynthetic process	GO:0019438	5	4.55e-12	4.69123	18	2243	19	11107	EVM0016128,EVM0012245,EVM0012446,EVM0008354,EVM0006170,EVM0014726,EVM0001180,EVM0008869,EVM0024475,EVM0001715,EVM0004829,EVM0016470,EVM0019803,EVM0013982,EVM0011684,EVM0020156,EVM0019524,EVM0028075,	9.4e-11
blue	Biological process	gene expression	GO:0010467	5	4.76e-12	3.93447	19	2823	19	11107	EVM0016128,EVM0012245,EVM0012446,EVM0008354,EVM0006170,EVM0014726,EVM0001180,EVM0008869,EVM0027983,EVM0024475,EVM0001715,EVM0004829,EVM0016470,EVM0019803,EVM0013982,EVM0011684,EVM0020156,EVM0019524,EVM0028075,	9.32e-11
blue	Biological process	regulation of cellular metabolic process	GO:0031323	5	5.85e-12	4.62524	18	2275	19	11107	EVM0016128,EVM0012245,EVM0012446,EVM0008354,EVM0006170,EVM0014726,EVM0001180,EVM0008869,EVM0024475,EVM0001715,EVM0004829,EVM0016470,EVM0019803,EVM0013982,EVM0011684,EVM0020156,EVM0019524,EVM0028075,	1.09e-10
blue	Biological process	regulation of macromolecule metabolic process	GO:0060255	5	7.39e-12	4.56504	18	2305	19	11107	EVM0016128,EVM0012245,EVM0012446,EVM0008354,EVM0006170,EVM0014726,EVM0001180,EVM0008869,EVM0024475,EVM0001715,EVM0004829,EVM0016470,EVM0019803,EVM0013982,EVM0011684,EVM0020156,EVM0019524,EVM0028075,	1.31e-10
blue	Biological process	RNA metabolic process	GO:0016070	7	7.69e-12	3.83661	19	2895	19	11107	EVM0016128,EVM0012245,EVM0012446,EVM0008354,EVM0006170,EVM0014726,EVM0001180,EVM0008869,EVM0027983,EVM0024475,EVM0001715,EVM0004829,EVM0016470,EVM0019803,EVM0013982,EVM0011684,EVM0020156,EVM0019524,EVM0028075,	1.3e-10
blue	Biological process	organic cyclic compound biosynthetic process	GO:1901362	5	9.67e-12	4.49676	18	2340	19	11107	EVM0016128,EVM0012245,EVM0012446,EVM0008354,EVM0006170,EVM0014726,EVM0001180,EVM0008869,EVM0024475,EVM0001715,EVM0004829,EVM0016470,EVM0019803,EVM0013982,EVM0011684,EVM0020156,EVM0019524,EVM0028075,	1.56e-10
blue	Biological process	cellular macromolecule biosynthetic process	GO:0034645	6	2.44e-11	4.26873	18	2465	19	11107	EVM0016128,EVM0012245,EVM0012446,EVM0008354,EVM0006170,EVM0014726,EVM0001180,EVM0008869,EVM0024475,EVM0001715,EVM0004829,EVM0016470,EVM0019803,EVM0013982,EVM0011684,EVM0020156,EVM0019524,EVM0028075,	3.79e-10
blue	Biological process	regulation of metabolic process	GO:0019222	4	3.62e-11	4.17556	18	2520	19	11107	EVM0016128,EVM0012245,EVM0012446,EVM0008354,EVM0006170,EVM0014726,EVM0001180,EVM0008869,EVM0024475,EVM0001715,EVM0004829,EVM0016470,EVM0019803,EVM0013982,EVM0011684,EVM0020156,EVM0019524,EVM0028075,	5.38e-10
blue	Biological process	cellular nitrogen compound biosynthetic process	GO:0044271	5	4.02e-11	4.15086	18	2535	19	11107	EVM0016128,EVM0012245,EVM0012446,EVM0008354,EVM0006170,EVM0014726,EVM0001180,EVM0008869,EVM0024475,EVM0001715,EVM0004829,EVM0016470,EVM0019803,EVM0013982,EVM0011684,EVM0020156,EVM0019524,EVM0028075,	5.75e-10
blue	Biological process	macromolecule biosynthetic process	GO:0009059	5	4.59e-11	4.11998	18	2554	19	11107	EVM0016128,EVM0012245,EVM0012446,EVM0008354,EVM0006170,EVM0014726,EVM0001180,EVM0008869,EVM0024475,EVM0001715,EVM0004829,EVM0016470,EVM0019803,EVM0013982,EVM0011684,EVM0020156,EVM0019524,EVM0028075,	6.32e-10
blue	Biological process	nucleic acid metabolic process	GO:0090304	6	7.18e-11	3.41229	19	3255	19	11107	EVM0016128,EVM0012245,EVM0012446,EVM0008354,EVM0006170,EVM0014726,EVM0001180,EVM0008869,EVM0027983,EVM0024475,EVM0001715,EVM0004829,EVM0016470,EVM0019803,EVM0013982,EVM0011684,EVM0020156,EVM0019524,EVM0028075,	9.54e-10
blue	Biological process	nucleobase-containing compound metabolic process	GO:0006139	5	3.55e-10	3.13757	19	3540	19	11107	EVM0016128,EVM0012245,EVM0012446,EVM0008354,EVM0006170,EVM0014726,EVM0001180,EVM0008869,EVM0027983,EVM0024475,EVM0001715,EVM0004829,EVM0016470,EVM0019803,EVM0013982,EVM0011684,EVM0020156,EVM0019524,EVM0028075,	4.56e-09
blue	Biological process	heterocycle metabolic process	GO:0046483	4	1.32e-09	2.92829	19	3793	19	11107	EVM0016128,EVM0012245,EVM0012446,EVM0008354,EVM0006170,EVM0014726,EVM0001180,EVM0008869,EVM0027983,EVM0024475,EVM0001715,EVM0004829,EVM0016470,EVM0019803,EVM0013982,EVM0011684,EVM0020156,EVM0019524,EVM0028075,	1.64e-08
blue	Biological process	cellular aromatic compound metabolic process	GO:0006725	4	2.43e-09	2.83631	19	3916	19	11107	EVM0016128,EVM0012245,EVM0012446,EVM0008354,EVM0006170,EVM0014726,EVM0001180,EVM0008869,EVM0027983,EVM0024475,EVM0001715,EVM0004829,EVM0016470,EVM0019803,EVM0013982,EVM0011684,EVM0020156,EVM0019524,EVM0028075,	2.91e-08
blue	Biological process	organic cyclic compound metabolic process	GO:1901360	4	4e-09	2.76294	19	4020	19	11107	EVM0016128,EVM0012245,EVM0012446,EVM0008354,EVM0006170,EVM0014726,EVM0001180,EVM0008869,EVM0027983,EVM0024475,EVM0001715,EVM0004829,EVM0016470,EVM0019803,EVM0013982,EVM0011684,EVM0020156,EVM0019524,EVM0028075,	4.65e-08
blue	Biological process	cellular nitrogen compound metabolic process	GO:0034641	4	5.61e-09	2.71432	19	4092	19	11107	EVM0016128,EVM0012245,EVM0012446,EVM0008354,EVM0006170,EVM0014726,EVM0001180,EVM0008869,EVM0027983,EVM0024475,EVM0001715,EVM0004829,EVM0016470,EVM0019803,EVM0013982,EVM0011684,EVM0020156,EVM0019524,EVM0028075,	6.32e-08
blue	Biological process	cellular biosynthetic process	GO:0044249	4	1.46e-08	2.9758	18	3536	19	11107	EVM0016128,EVM0012245,EVM0012446,EVM0008354,EVM0006170,EVM0014726,EVM0001180,EVM0008869,EVM0024475,EVM0001715,EVM0004829,EVM0016470,EVM0019803,EVM0013982,EVM0011684,EVM0020156,EVM0019524,EVM0028075,	1.59e-07
blue	Biological process	organic substance biosynthetic process	GO:1901576	4	2.46e-08	2.88839	18	3643	19	11107	EVM0016128,EVM0012245,EVM0012446,EVM0008354,EVM0006170,EVM0014726,EVM0001180,EVM0008869,EVM0024475,EVM0001715,EVM0004829,EVM0016470,EVM0019803,EVM0013982,EVM0011684,EVM0020156,EVM0019524,EVM0028075,	2.62e-07
blue	Biological process	biosynthetic process	GO:0009058	3	4.45e-08	2.79257	18	3768	19	11107	EVM0016128,EVM0012245,EVM0012446,EVM0008354,EVM0006170,EVM0014726,EVM0001180,EVM0008869,EVM0024475,EVM0001715,EVM0004829,EVM0016470,EVM0019803,EVM0013982,EVM0011684,EVM0020156,EVM0019524,EVM0028075,	4.6e-07
blue	Biological process	regulation of cellular process	GO:0050794	4	1.09e-07	2.65316	18	3966	19	11107	EVM0016128,EVM0012245,EVM0012446,EVM0008354,EVM0006170,EVM0014726,EVM0001180,EVM0008869,EVM0024475,EVM0001715,EVM0004829,EVM0016470,EVM0019803,EVM0013982,EVM0011684,EVM0020156,EVM0019524,EVM0028075,	1.1e-06
blue	Biological process	cellular macromolecule metabolic process	GO:0044260	5	6.06e-07	2.40567	18	4374	19	11107	EVM0016128,EVM0012245,EVM0012446,EVM0008354,EVM0006170,EVM0014726,EVM0001180,EVM0008869,EVM0024475,EVM0001715,EVM0004829,EVM0016470,EVM0019803,EVM0013982,EVM0011684,EVM0020156,EVM0019524,EVM0028075,	5.93e-06
blue	Biological process	regulation of biological process	GO:0050789	3	6.69e-07	2.392	18	4399	19	11107	EVM0016128,EVM0012245,EVM0012446,EVM0008354,EVM0006170,EVM0014726,EVM0001180,EVM0008869,EVM0024475,EVM0001715,EVM0004829,EVM0016470,EVM0019803,EVM0013982,EVM0011684,EVM0020156,EVM0019524,EVM0028075,	6.38e-06
blue	Biological process	macromolecule metabolic process	GO:0043170	4	2.21e-06	1.98304	19	5601	19	11107	EVM0016128,EVM0012245,EVM0012446,EVM0008354,EVM0006170,EVM0014726,EVM0001180,EVM0008869,EVM0027983,EVM0024475,EVM0001715,EVM0004829,EVM0016470,EVM0019803,EVM0013982,EVM0011684,EVM0020156,EVM0019524,EVM0028075,	2.05e-05
blue	Biological process	developmental process	GO:0032502	2	4.2e-06	2.88538	15	3039	19	11107	EVM0016128,EVM0012245,EVM0012446,EVM0008354,EVM0014726,EVM0001180,EVM0008869,EVM0001715,EVM0004829,EVM0016470,EVM0013982,EVM0011684,EVM0020156,EVM0019524,EVM0028075,	3.81e-05
blue	Biological process	biological regulation	GO:0065007	2	4.75e-06	2.13697	18	4924	19	11107	EVM0016128,EVM0012245,EVM0012446,EVM0008354,EVM0006170,EVM0014726,EVM0001180,EVM0008869,EVM0024475,EVM0001715,EVM0004829,EVM0016470,EVM0019803,EVM0013982,EVM0011684,EVM0020156,EVM0019524,EVM0028075,	4.2e-05
blue	Biological process	nitrogen compound metabolic process	GO:0006807	3	8.47e-06	1.84778	19	6011	19	11107	EVM0016128,EVM0012245,EVM0012446,EVM0008354,EVM0006170,EVM0014726,EVM0001180,EVM0008869,EVM0027983,EVM0024475,EVM0001715,EVM0004829,EVM0016470,EVM0019803,EVM0013982,EVM0011684,EVM0020156,EVM0019524,EVM0028075,	7.33e-05
blue	Biological process	system development	GO:0048731	4	8.57e-06	3.72146	12	1885	19	11107	EVM0016128,EVM0012245,EVM0008354,EVM0014726,EVM0008869,EVM0001715,EVM0004829,EVM0016470,EVM0011684,EVM0020156,EVM0019524,EVM0028075,	7.25e-05
blue	Biological process	regulation of transcription by RNA polymerase II	GO:0006357	11	1.24e-05	10.6935	6	328	19	11107	EVM0012245,EVM0012446,EVM0008354,EVM0001180,EVM0016470,EVM0019524,	0.000102646
blue	Biological process	plant organ development	GO:0099402	4	1.69e-05	5.18857	9	1014	19	11107	EVM0016128,EVM0008354,EVM0014726,EVM0008869,EVM0001715,EVM0004829,EVM0016470,EVM0019524,EVM0028075,	0.000136624
blue	Biological process	cell differentiation	GO:0030154	4	1.76e-05	6.16157	8	759	19	11107	EVM0012446,EVM0008354,EVM0014726,EVM0001180,EVM0016470,EVM0013982,EVM0019524,EVM0028075,	0.000139268
blue	Biological process	transcription by RNA polymerase II	GO:0006366	11	2.78e-05	9.27903	6	378	19	11107	EVM0012245,EVM0012446,EVM0008354,EVM0001180,EVM0016470,EVM0019524,	0.000215493
blue	Biological process	positive regulation of DNA-templated transcription	GO:0045893	11	5.67e-05	8.17593	6	429	19	11107	EVM0012245,EVM0014726,EVM0024475,EVM0004829,EVM0011684,EVM0019524,	0.000430115
blue	Biological process	primary metabolic process	GO:0044238	3	5.82e-05	1.66972	19	6652	19	11107	EVM0016128,EVM0012245,EVM0012446,EVM0008354,EVM0006170,EVM0014726,EVM0001180,EVM0008869,EVM0027983,EVM0024475,EVM0001715,EVM0004829,EVM0016470,EVM0019803,EVM0013982,EVM0011684,EVM0020156,EVM0019524,EVM0028075,	0.000433353
blue	Biological process	positive regulation of RNA biosynthetic process	GO:1902680	9	7.49e-05	7.7771	6	451	19	11107	EVM0012245,EVM0014726,EVM0024475,EVM0004829,EVM0011684,EVM0019524,	0.000546308
blue	Biological process	positive regulation of nucleic acid-templated transcription	GO:1903508	10	7.49e-05	7.7771	6	451	19	11107	EVM0012245,EVM0014726,EVM0024475,EVM0004829,EVM0011684,EVM0019524,	0.000546308
blue	Biological process	cellular developmental process	GO:0048869	3	7.85e-05	5.01247	8	933	19	11107	EVM0012446,EVM0008354,EVM0014726,EVM0001180,EVM0016470,EVM0013982,EVM0019524,EVM0028075,	0.000550972
blue	Biological process	multicellular organism development	GO:0007275	4	0.00013221	2.8691	12	2445	19	11107	EVM0016128,EVM0012245,EVM0008354,EVM0014726,EVM0008869,EVM0001715,EVM0004829,EVM0016470,EVM0011684,EVM0020156,EVM0019524,EVM0028075,	0.000894218
blue	Biological process	positive regulation of macromolecule biosynthetic process	GO:0010557	7	0.000147936	6.8774	6	510	19	11107	EVM0012245,EVM0014726,EVM0024475,EVM0004829,EVM0011684,EVM0019524,	0.000982717
blue	Biological process	positive regulation of RNA metabolic process	GO:0051254	8	0.000162869	6.75814	6	519	19	11107	EVM0012245,EVM0014726,EVM0024475,EVM0004829,EVM0011684,EVM0019524,	0.00106294
blue	Biological process	positive regulation of cellular biosynthetic process	GO:0031328	7	0.000180849	6.63039	6	529	19	11107	EVM0012245,EVM0014726,EVM0024475,EVM0004829,EVM0011684,EVM0019524,	0.00114027
blue	Biological process	positive regulation of gene expression	GO:0010628	7	0.000186541	6.593	6	532	19	11107	EVM0012245,EVM0014726,EVM0024475,EVM0004829,EVM0011684,EVM0019524,	0.00115655
blue	Biological process	cellular metabolic process	GO:0044237	3	0.0001867	1.57056	19	7072	19	11107	EVM0016128,EVM0012245,EVM0012446,EVM0008354,EVM0006170,EVM0014726,EVM0001180,EVM0008869,EVM0027983,EVM0024475,EVM0001715,EVM0004829,EVM0016470,EVM0019803,EVM0013982,EVM0011684,EVM0020156,EVM0019524,EVM0028075,	0.00113856
blue	Biological process	organic substance metabolic process	GO:0071704	3	0.000187203	1.57034	19	7073	19	11107	EVM0016128,EVM0012245,EVM0012446,EVM0008354,EVM0006170,EVM0014726,EVM0001180,EVM0008869,EVM0027983,EVM0024475,EVM0001715,EVM0004829,EVM0016470,EVM0019803,EVM0013982,EVM0011684,EVM0020156,EVM0019524,EVM0028075,	0.00112322
blue	Biological process	phyllome development	GO:0048827	5	0.000192375	6.55603	6	535	19	11107	EVM0008354,EVM0008869,EVM0001715,EVM0004829,EVM0016470,EVM0028075,	0.00113593
blue	Biological process	positive regulation of biosynthetic process	GO:0009891	6	0.000230505	6.34263	6	553	19	11107	EVM0012245,EVM0014726,EVM0024475,EVM0004829,EVM0011684,EVM0019524,	0.00133981
blue	Biological process	positive regulation of nucleobase-containing compound metabolic process	GO:0045935	7	0.000242099	6.2858	6	558	19	11107	EVM0012245,EVM0014726,EVM0024475,EVM0004829,EVM0011684,EVM0019524,	0.00138555
blue	Biological process	multicellular organismal process	GO:0032501	2	0.00037134	2.59141	12	2707	19	11107	EVM0016128,EVM0012245,EVM0008354,EVM0014726,EVM0008869,EVM0001715,EVM0004829,EVM0016470,EVM0011684,EVM0020156,EVM0019524,EVM0028075,	0.00203145
blue	Biological process	anatomical structure development	GO:0048856	3	0.000655104	2.44764	12	2866	19	11107	EVM0016128,EVM0012245,EVM0008354,EVM0014726,EVM0008869,EVM0001715,EVM0004829,EVM0016470,EVM0011684,EVM0020156,EVM0019524,EVM0028075,	0.00348141
blue	Biological process	positive regulation of nitrogen compound metabolic process	GO:0051173	6	0.000929051	4.89187	6	717	19	11107	EVM0012245,EVM0014726,EVM0024475,EVM0004829,EVM0011684,EVM0019524,	0.00473434
blue	Biological process	metabolic process	GO:0008152	2	0.00101926	1.4365	19	7732	19	11107	EVM0016128,EVM0012245,EVM0012446,EVM0008354,EVM0006170,EVM0014726,EVM0001180,EVM0008869,EVM0027983,EVM0024475,EVM0001715,EVM0004829,EVM0016470,EVM0019803,EVM0013982,EVM0011684,EVM0020156,EVM0019524,EVM0028075,	0.00512384
blue	Biological process	positive regulation of cellular metabolic process	GO:0031325	6	0.00121842	4.64566	6	755	19	11107	EVM0012245,EVM0014726,EVM0024475,EVM0004829,EVM0011684,EVM0019524,	0.00604337
blue	Biological process	positive regulation of macromolecule metabolic process	GO:0010604	6	0.00139652	4.52577	6	775	19	11107	EVM0012245,EVM0014726,EVM0024475,EVM0004829,EVM0011684,EVM0019524,	0.00683559
blue	Biological process	positive regulation of cellular process	GO:0048522	5	0.00142164	3.78894	7	1080	19	11107	EVM0012245,EVM0014726,EVM0024475,EVM0001715,EVM0004829,EVM0011684,EVM0019524,	0.00686818
blue	Biological process	shoot system development	GO:0048367	5	0.00227772	4.11675	6	852	19	11107	EVM0008354,EVM0008869,EVM0001715,EVM0004829,EVM0016470,EVM0028075,	0.0107255
blue	Biological process	positive regulation of metabolic process	GO:0009893	5	0.00231907	4.10231	6	855	19	11107	EVM0012245,EVM0014726,EVM0024475,EVM0004829,EVM0011684,EVM0019524,	0.0107837
blue	Biological process	developmental process involved in reproduction	GO:0003006	3	0.00551632	2.99565	7	1366	19	11107	EVM0012245,EVM0008869,EVM0001715,EVM0016470,EVM0011684,EVM0020156,EVM0019524,	0.0213758
blue	Biological process	positive regulation of biological process	GO:0048518	4	0.0056304	2.98472	7	1371	19	11107	EVM0012245,EVM0014726,EVM0024475,EVM0001715,EVM0004829,EVM0011684,EVM0019524,	0.0215929
blue	Biological process	anatomical structure morphogenesis	GO:0009653	3	0.00585167	3.41194	6	1028	19	11107	EVM0012245,EVM0008354,EVM0014726,EVM0008869,EVM0004829,EVM0019524,	0.0219881
blue	Biological process	response to acid chemical	GO:0001101	4	0.0073164	3.25973	6	1076	19	11107	EVM0008354,EVM0001180,EVM0024475,EVM0016470,EVM0013982,EVM0020156,	0.0264243
blue	Biological process	cellular response to hormone stimulus	GO:0032870	6	0.00856537	3.7473	5	780	19	11107	EVM0024475,EVM0016470,EVM0019803,EVM0013982,EVM0020156,	0.0287056
blue	Biological process	regulation of developmental process	GO:0050793	4	0.00907901	3.69519	5	791	19	11107	EVM0016128,EVM0004829,EVM0013982,EVM0011684,EVM0020156,	0.0293686
blue	Biological process	response to hormone	GO:0009725	5	0.0100541	2.68684	7	1523	19	11107	EVM0008354,EVM0001180,EVM0024475,EVM0016470,EVM0019803,EVM0013982,EVM0020156,	0.031967
blue	Biological process	reproductive system development	GO:0061458	5	0.0102544	3.03941	6	1154	19	11107	EVM0012245,EVM0008869,EVM0001715,EVM0016470,EVM0011684,EVM0020156,	0.0310132
blue	Biological process	reproductive structure development	GO:0048608	4	0.0102544	3.03941	6	1154	19	11107	EVM0012245,EVM0008869,EVM0001715,EVM0016470,EVM0011684,EVM0020156,	0.0310132
blue	Biological process	reproductive process	GO:0022414	2	0.0110955	2.63833	7	1551	19	11107	EVM0012245,EVM0008869,EVM0001715,EVM0016470,EVM0011684,EVM0020156,EVM0019524,	0.0330203
blue	Biological process	cellular response to endogenous stimulus	GO:0071495	4	0.011241	3.50888	5	833	19	11107	EVM0024475,EVM0016470,EVM0019803,EVM0013982,EVM0020156,	0.0331878
blue	Biological process	reproduction	GO:0000003	2	0.0114469	2.62311	7	1560	19	11107	EVM0012245,EVM0008869,EVM0001715,EVM0016470,EVM0011684,EVM0020156,EVM0019524,	0.0330098
blue	Biological process	response to endogenous stimulus	GO:0009719	3	0.0118471	2.6064	7	1570	19	11107	EVM0008354,EVM0001180,EVM0024475,EVM0016470,EVM0019803,EVM0013982,EVM0020156,	0.0333874
blue	Biological process	response to oxygen-containing compound	GO:1901700	4	0.0126789	2.57362	7	1590	19	11107	EVM0008354,EVM0001180,EVM0024475,EVM0016470,EVM0019803,EVM0013982,EVM0020156,	0.0346806
blue	Biological process	cellular response to organic substance	GO:0071310	5	0.0221408	2.9644	5	986	19	11107	EVM0024475,EVM0016470,EVM0019803,EVM0013982,EVM0020156,	0.052461
blue	Biological process	response to organic substance	GO:0010033	4	0.0347061	2.11694	7	1933	19	11107	EVM0008354,EVM0001180,EVM0024475,EVM0016470,EVM0019803,EVM0013982,EVM0020156,	0.0750621
blue	Biological process	post-embryonic development	GO:0009791	3	0.0384076	2.2761	6	1541	19	11107	EVM0012245,EVM0008869,EVM0001715,EVM0016470,EVM0011684,EVM0020156,	0.0821128
brown	Molecular function	transcription regulator activity	GO:0140110	2	0	6.96647	29	1221	32	9386	EVM0011178,EVM0021251,EVM0015936,EVM0023031,EVM0025124,EVM0026418,EVM0000846,EVM0006308,EVM0018155,EVM0019525,EVM0010150,EVM0018356,EVM0007430,EVM0008240,EVM0004378,EVM0006115,EVM0003728,add_RNAAddG006869,EVM0020467,EVM0009463,EVM0010823,EVM0025385,EVM0005992,EVM0024896,EVM0021700,EVM0019348,EVM0008066,EVM0014538,EVM0022230,	0
brown	Molecular function	DNA-binding transcription factor activity	GO:0003700	3	2.22e-16	7.42239	29	1146	32	9386	EVM0011178,EVM0021251,EVM0015936,EVM0023031,EVM0025124,EVM0026418,EVM0000846,EVM0006308,EVM0018155,EVM0019525,EVM0010150,EVM0018356,EVM0007430,EVM0008240,EVM0004378,EVM0006115,EVM0003728,add_RNAAddG006869,EVM0020467,EVM0009463,EVM0010823,EVM0025385,EVM0005992,EVM0024896,EVM0021700,EVM0019348,EVM0008066,EVM0014538,EVM0022230,	4.22e-15
brown	Molecular function	DNA binding	GO:0003677	5	1.69e-08	4.86321	16	965	32	9386	EVM0011178,EVM0025124,EVM0026418,EVM0006308,EVM0018155,EVM0018356,EVM0007430,EVM0004378,EVM0006115,add_RNAAddG006869,EVM0025385,EVM0005992,EVM0024896,EVM0019348,EVM0014538,EVM0022230,	2.14e-07
brown	Molecular function	sequence-specific DNA binding	GO:0043565	6	3.71e-06	5.1623	11	625	32	9386	EVM0011178,EVM0025124,EVM0026418,EVM0018356,EVM0004378,add_RNAAddG006869,EVM0025385,EVM0005992,EVM0019348,EVM0014538,EVM0022230,	3.53e-05
brown	Molecular function	DNA-binding transcription factor activity, RNA polymerase II-specific	GO:0000981	4	0.000143026	9.71233	5	151	32	9386	EVM0026418,EVM0004378,EVM0025385,EVM0014538,EVM0022230,	0.000776428
brown	Molecular function	nucleic acid binding	GO:0003676	4	0.000503332	2.24976	16	2086	32	9386	EVM0011178,EVM0025124,EVM0026418,EVM0006308,EVM0018155,EVM0018356,EVM0007430,EVM0004378,EVM0006115,add_RNAAddG006869,EVM0025385,EVM0005992,EVM0024896,EVM0019348,EVM0014538,EVM0022230,	0.00239083
brown	Molecular function	transcription cis-regulatory region binding	GO:0000976	8	0.000841715	5.22218	6	337	32	9386	EVM0025124,EVM0026418,EVM0004378,EVM0025385,EVM0005992,EVM0014538,	0.00319852
brown	Molecular function	transcription regulatory region nucleic acid binding	GO:0001067	5	0.000841715	5.22218	6	337	32	9386	EVM0025124,EVM0026418,EVM0004378,EVM0025385,EVM0005992,EVM0014538,	0.00319852
brown	Molecular function	sequence-specific double-stranded DNA binding	GO:1990837	7	0.00132945	4.78227	6	368	32	9386	EVM0025124,EVM0026418,EVM0004378,EVM0025385,EVM0005992,EVM0014538,	0.00420994
brown	Molecular function	heterocyclic compound binding	GO:1901363	3	0.00275149	1.94086	16	2418	32	9386	EVM0011178,EVM0025124,EVM0026418,EVM0006308,EVM0018155,EVM0018356,EVM0007430,EVM0004378,EVM0006115,add_RNAAddG006869,EVM0025385,EVM0005992,EVM0024896,EVM0019348,EVM0014538,EVM0022230,	0.00746833
brown	Molecular function	organic cyclic compound binding	GO:0097159	3	0.0028538	1.93446	16	2426	32	9386	EVM0011178,EVM0025124,EVM0026418,EVM0006308,EVM0018155,EVM0018356,EVM0007430,EVM0004378,EVM0006115,add_RNAAddG006869,EVM0025385,EVM0005992,EVM0024896,EVM0019348,EVM0014538,EVM0022230,	0.00722962
brown	Molecular function	double-stranded DNA binding	GO:0003690	6	0.00383833	3.87638	6	454	32	9386	EVM0025124,EVM0026418,EVM0004378,EVM0025385,EVM0005992,EVM0014538,	0.00911602
brown	Cellular component	nucleus	GO:0005634	6	8.33e-08	3.04135	16	3448	17	11142	EVM0011178,EVM0025124,EVM0026418,EVM0006628,EVM0019525,EVM0010150,EVM0018356,EVM0008240,EVM0004378,EVM0003728,EVM0025385,EVM0005992,EVM0021700,EVM0008066,EVM0014538,EVM0022230,	2.5e-06
brown	Cellular component	intracellular membrane-bounded organelle	GO:0043231	5	0.0224732	1.3296	16	7887	17	11142	EVM0011178,EVM0025124,EVM0026418,EVM0006628,EVM0019525,EVM0010150,EVM0018356,EVM0008240,EVM0004378,EVM0003728,EVM0025385,EVM0005992,EVM0021700,EVM0008066,EVM0014538,EVM0022230,	0.224732
brown	Cellular component	membrane-bounded organelle	GO:0043227	4	0.0237426	1.3244	16	7918	17	11142	EVM0011178,EVM0025124,EVM0026418,EVM0006628,EVM0019525,EVM0010150,EVM0018356,EVM0008240,EVM0004378,EVM0003728,EVM0025385,EVM0005992,EVM0021700,EVM0008066,EVM0014538,EVM0022230,	0.17807
brown	Cellular component	intracellular organelle	GO:0043229	4	0.0375684	1.28135	16	8184	17	11142	EVM0011178,EVM0025124,EVM0026418,EVM0006628,EVM0019525,EVM0010150,EVM0018356,EVM0008240,EVM0004378,EVM0003728,EVM0025385,EVM0005992,EVM0021700,EVM0008066,EVM0014538,EVM0022230,	0.22541
brown	Cellular component	organelle	GO:0043226	3	0.039179	1.27745	16	8209	17	11142	EVM0011178,EVM0025124,EVM0026418,EVM0006628,EVM0019525,EVM0010150,EVM0018356,EVM0008240,EVM0004378,EVM0003728,EVM0025385,EVM0005992,EVM0021700,EVM0008066,EVM0014538,EVM0022230,	0.195895
brown	Cellular component	intracellular anatomical structure	GO:0005622	3	0.0471542	1.19665	17	9311	17	11142	EVM0011178,EVM0025124,EVM0026418,EVM0006628,EVM0019525,EVM0010150,EVM0018356,EVM0008240,EVM0004378,EVM0003728,EVM0025385,EVM0005992,EVM0024896,EVM0021700,EVM0008066,EVM0014538,EVM0022230,	0.202089
brown	Biological process	RNA biosynthetic process	GO:0032774	8	0	5.62745	32	1707	37	11107	EVM0011178,EVM0004230,EVM0024243,EVM0021251,EVM0015936,EVM0023031,EVM0025124,EVM0026418,EVM0000846,EVM0021519,EVM0006308,EVM0018155,EVM0019525,EVM0010150,EVM0018356,EVM0007430,EVM0008240,EVM0004378,EVM0006115,EVM0003728,add_RNAAddG006869,EVM0020467,EVM0009463,EVM0010823,EVM0025385,EVM0005992,EVM0024896,EVM0021700,EVM0019348,EVM0008066,EVM0014538,EVM0022230,	0
brown	Biological process	DNA-templated transcription	GO:0006351	10	0	5.75903	32	1668	37	11107	EVM0011178,EVM0004230,EVM0024243,EVM0021251,EVM0015936,EVM0023031,EVM0025124,EVM0026418,EVM0000846,EVM0021519,EVM0006308,EVM0018155,EVM0019525,EVM0010150,EVM0018356,EVM0007430,EVM0008240,EVM0004378,EVM0006115,EVM0003728,add_RNAAddG006869,EVM0020467,EVM0009463,EVM0010823,EVM0025385,EVM0005992,EVM0024896,EVM0021700,EVM0019348,EVM0008066,EVM0014538,EVM0022230,	0
brown	Biological process	regulation of DNA-templated transcription	GO:0006355	10	0	6.04915	32	1588	37	11107	EVM0011178,EVM0004230,EVM0024243,EVM0021251,EVM0015936,EVM0023031,EVM0025124,EVM0026418,EVM0000846,EVM0021519,EVM0006308,EVM0018155,EVM0019525,EVM0010150,EVM0018356,EVM0007430,EVM0008240,EVM0004378,EVM0006115,EVM0003728,add_RNAAddG006869,EVM0020467,EVM0009463,EVM0010823,EVM0025385,EVM0005992,EVM0024896,EVM0021700,EVM0019348,EVM0008066,EVM0014538,EVM0022230,	0
brown	Biological process	regulation of primary metabolic process	GO:0080090	5	0	4.36242	32	2202	37	11107	EVM0011178,EVM0004230,EVM0024243,EVM0021251,EVM0015936,EVM0023031,EVM0025124,EVM0026418,EVM0000846,EVM0021519,EVM0006308,EVM0018155,EVM0019525,EVM0010150,EVM0018356,EVM0007430,EVM0008240,EVM0004378,EVM0006115,EVM0003728,add_RNAAddG006869,EVM0020467,EVM0009463,EVM0010823,EVM0025385,EVM0005992,EVM0024896,EVM0021700,EVM0019348,EVM0008066,EVM0014538,EVM0022230,	0
brown	Biological process	regulation of gene expression	GO:0010468	6	0	4.86876	32	1973	37	11107	EVM0011178,EVM0004230,EVM0024243,EVM0021251,EVM0015936,EVM0023031,EVM0025124,EVM0026418,EVM0000846,EVM0021519,EVM0006308,EVM0018155,EVM0019525,EVM0010150,EVM0018356,EVM0007430,EVM0008240,EVM0004378,EVM0006115,EVM0003728,add_RNAAddG006869,EVM0020467,EVM0009463,EVM0010823,EVM0025385,EVM0005992,EVM0024896,EVM0021700,EVM0019348,EVM0008066,EVM0014538,EVM0022230,	0
brown	Biological process	regulation of RNA biosynthetic process	GO:2001141	8	0	5.94066	32	1617	37	11107	EVM0011178,EVM0004230,EVM0024243,EVM0021251,EVM0015936,EVM0023031,EVM0025124,EVM0026418,EVM0000846,EVM0021519,EVM0006308,EVM0018155,EVM0019525,EVM0010150,EVM0018356,EVM0007430,EVM0008240,EVM0004378,EVM0006115,EVM0003728,add_RNAAddG006869,EVM0020467,EVM0009463,EVM0010823,EVM0025385,EVM0005992,EVM0024896,EVM0021700,EVM0019348,EVM0008066,EVM0014538,EVM0022230,	0
brown	Biological process	regulation of macromolecule biosynthetic process	GO:0010556	6	0	5.35156	32	1795	37	11107	EVM0011178,EVM0004230,EVM0024243,EVM0021251,EVM0015936,EVM0023031,EVM0025124,EVM0026418,EVM0000846,EVM0021519,EVM0006308,EVM0018155,EVM0019525,EVM0010150,EVM0018356,EVM0007430,EVM0008240,EVM0004378,EVM0006115,EVM0003728,add_RNAAddG006869,EVM0020467,EVM0009463,EVM0010823,EVM0025385,EVM0005992,EVM0024896,EVM0021700,EVM0019348,EVM0008066,EVM0014538,EVM0022230,	0
brown	Biological process	nucleic acid-templated transcription	GO:0097659	9	0	5.67398	32	1693	37	11107	EVM0011178,EVM0004230,EVM0024243,EVM0021251,EVM0015936,EVM0023031,EVM0025124,EVM0026418,EVM0000846,EVM0021519,EVM0006308,EVM0018155,EVM0019525,EVM0010150,EVM0018356,EVM0007430,EVM0008240,EVM0004378,EVM0006115,EVM0003728,add_RNAAddG006869,EVM0020467,EVM0009463,EVM0010823,EVM0025385,EVM0005992,EVM0024896,EVM0021700,EVM0019348,EVM0008066,EVM0014538,EVM0022230,	0
brown	Biological process	regulation of cellular biosynthetic process	GO:0031326	6	0	5.14243	32	1868	37	11107	EVM0011178,EVM0004230,EVM0024243,EVM0021251,EVM0015936,EVM0023031,EVM0025124,EVM0026418,EVM0000846,EVM0021519,EVM0006308,EVM0018155,EVM0019525,EVM0010150,EVM0018356,EVM0007430,EVM0008240,EVM0004378,EVM0006115,EVM0003728,add_RNAAddG006869,EVM0020467,EVM0009463,EVM0010823,EVM0025385,EVM0005992,EVM0024896,EVM0021700,EVM0019348,EVM0008066,EVM0014538,EVM0022230,	0
brown	Biological process	regulation of nucleobase-containing compound metabolic process	GO:0019219	6	0	5.24348	32	1832	37	11107	EVM0011178,EVM0004230,EVM0024243,EVM0021251,EVM0015936,EVM0023031,EVM0025124,EVM0026418,EVM0000846,EVM0021519,EVM0006308,EVM0018155,EVM0019525,EVM0010150,EVM0018356,EVM0007430,EVM0008240,EVM0004378,EVM0006115,EVM0003728,add_RNAAddG006869,EVM0020467,EVM0009463,EVM0010823,EVM0025385,EVM0005992,EVM0024896,EVM0021700,EVM0019348,EVM0008066,EVM0014538,EVM0022230,	0
brown	Biological process	organic cyclic compound biosynthetic process	GO:1901362	5	0	4.10515	32	2340	37	11107	EVM0011178,EVM0004230,EVM0024243,EVM0021251,EVM0015936,EVM0023031,EVM0025124,EVM0026418,EVM0000846,EVM0021519,EVM0006308,EVM0018155,EVM0019525,EVM0010150,EVM0018356,EVM0007430,EVM0008240,EVM0004378,EVM0006115,EVM0003728,add_RNAAddG006869,EVM0020467,EVM0009463,EVM0010823,EVM0025385,EVM0005992,EVM0024896,EVM0021700,EVM0019348,EVM0008066,EVM0014538,EVM0022230,	0
brown	Biological process	nucleobase-containing compound biosynthetic process	GO:0034654	6	0	4.89855	32	1961	37	11107	EVM0011178,EVM0004230,EVM0024243,EVM0021251,EVM0015936,EVM0023031,EVM0025124,EVM0026418,EVM0000846,EVM0021519,EVM0006308,EVM0018155,EVM0019525,EVM0010150,EVM0018356,EVM0007430,EVM0008240,EVM0004378,EVM0006115,EVM0003728,add_RNAAddG006869,EVM0020467,EVM0009463,EVM0010823,EVM0025385,EVM0005992,EVM0024896,EVM0021700,EVM0019348,EVM0008066,EVM0014538,EVM0022230,	0
brown	Biological process	regulation of nucleic acid-templated transcription	GO:1903506	9	0	5.94066	32	1617	37	11107	EVM0011178,EVM0004230,EVM0024243,EVM0021251,EVM0015936,EVM0023031,EVM0025124,EVM0026418,EVM0000846,EVM0021519,EVM0006308,EVM0018155,EVM0019525,EVM0010150,EVM0018356,EVM0007430,EVM0008240,EVM0004378,EVM0006115,EVM0003728,add_RNAAddG006869,EVM0020467,EVM0009463,EVM0010823,EVM0025385,EVM0005992,EVM0024896,EVM0021700,EVM0019348,EVM0008066,EVM0014538,EVM0022230,	0
brown	Biological process	regulation of nitrogen compound metabolic process	GO:0051171	5	0	4.45343	32	2157	37	11107	EVM0011178,EVM0004230,EVM0024243,EVM0021251,EVM0015936,EVM0023031,EVM0025124,EVM0026418,EVM0000846,EVM0021519,EVM0006308,EVM0018155,EVM0019525,EVM0010150,EVM0018356,EVM0007430,EVM0008240,EVM0004378,EVM0006115,EVM0003728,add_RNAAddG006869,EVM0020467,EVM0009463,EVM0010823,EVM0025385,EVM0005992,EVM0024896,EVM0021700,EVM0019348,EVM0008066,EVM0014538,EVM0022230,	0
brown	Biological process	aromatic compound biosynthetic process	GO:0019438	5	0	4.28268	32	2243	37	11107	EVM0011178,EVM0004230,EVM0024243,EVM0021251,EVM0015936,EVM0023031,EVM0025124,EVM0026418,EVM0000846,EVM0021519,EVM0006308,EVM0018155,EVM0019525,EVM0010150,EVM0018356,EVM0007430,EVM0008240,EVM0004378,EVM0006115,EVM0003728,add_RNAAddG006869,EVM0020467,EVM0009463,EVM0010823,EVM0025385,EVM0005992,EVM0024896,EVM0021700,EVM0019348,EVM0008066,EVM0014538,EVM0022230,	0
brown	Biological process	regulation of cellular macromolecule biosynthetic process	GO:2000112	7	1.11e-16	5.4673	32	1757	37	11107	EVM0011178,EVM0004230,EVM0024243,EVM0021251,EVM0015936,EVM0023031,EVM0025124,EVM0026418,EVM0000846,EVM0021519,EVM0006308,EVM0018155,EVM0019525,EVM0010150,EVM0018356,EVM0007430,EVM0008240,EVM0004378,EVM0006115,EVM0003728,add_RNAAddG006869,EVM0020467,EVM0009463,EVM0010823,EVM0025385,EVM0005992,EVM0024896,EVM0021700,EVM0019348,EVM0008066,EVM0014538,EVM0022230,	2.71e-15
brown	Biological process	cellular nitrogen compound biosynthetic process	GO:0044271	5	1.11e-16	3.78937	32	2535	37	11107	EVM0011178,EVM0004230,EVM0024243,EVM0021251,EVM0015936,EVM0023031,EVM0025124,EVM0026418,EVM0000846,EVM0021519,EVM0006308,EVM0018155,EVM0019525,EVM0010150,EVM0018356,EVM0007430,EVM0008240,EVM0004378,EVM0006115,EVM0003728,add_RNAAddG006869,EVM0020467,EVM0009463,EVM0010823,EVM0025385,EVM0005992,EVM0024896,EVM0021700,EVM0019348,EVM0008066,EVM0014538,EVM0022230,	2.71e-15
brown	Biological process	heterocycle biosynthetic process	GO:0018130	5	1.11e-16	4.43698	32	2165	37	11107	EVM0011178,EVM0004230,EVM0024243,EVM0021251,EVM0015936,EVM0023031,EVM0025124,EVM0026418,EVM0000846,EVM0021519,EVM0006308,EVM0018155,EVM0019525,EVM0010150,EVM0018356,EVM0007430,EVM0008240,EVM0004378,EVM0006115,EVM0003728,add_RNAAddG006869,EVM0020467,EVM0009463,EVM0010823,EVM0025385,EVM0005992,EVM0024896,EVM0021700,EVM0019348,EVM0008066,EVM0014538,EVM0022230,	2.71e-15
brown	Biological process	cellular macromolecule biosynthetic process	GO:0034645	6	1.11e-16	3.89698	32	2465	37	11107	EVM0011178,EVM0004230,EVM0024243,EVM0021251,EVM0015936,EVM0023031,EVM0025124,EVM0026418,EVM0000846,EVM0021519,EVM0006308,EVM0018155,EVM0019525,EVM0010150,EVM0018356,EVM0007430,EVM0008240,EVM0004378,EVM0006115,EVM0003728,add_RNAAddG006869,EVM0020467,EVM0009463,EVM0010823,EVM0025385,EVM0005992,EVM0024896,EVM0021700,EVM0019348,EVM0008066,EVM0014538,EVM0022230,	2.71e-15
brown	Biological process	regulation of macromolecule metabolic process	GO:0060255	5	1.11e-16	4.16749	32	2305	37	11107	EVM0011178,EVM0004230,EVM0024243,EVM0021251,EVM0015936,EVM0023031,EVM0025124,EVM0026418,EVM0000846,EVM0021519,EVM0006308,EVM0018155,EVM0019525,EVM0010150,EVM0018356,EVM0007430,EVM0008240,EVM0004378,EVM0006115,EVM0003728,add_RNAAddG006869,EVM0020467,EVM0009463,EVM0010823,EVM0025385,EVM0005992,EVM0024896,EVM0021700,EVM0019348,EVM0008066,EVM0014538,EVM0022230,	2.71e-15
brown	Biological process	regulation of RNA metabolic process	GO:0051252	7	2.22e-16	5.54622	32	1732	37	11107	EVM0011178,EVM0004230,EVM0024243,EVM0021251,EVM0015936,EVM0023031,EVM0025124,EVM0026418,EVM0000846,EVM0021519,EVM0006308,EVM0018155,EVM0019525,EVM0010150,EVM0018356,EVM0007430,EVM0008240,EVM0004378,EVM0006115,EVM0003728,add_RNAAddG006869,EVM0020467,EVM0009463,EVM0010823,EVM0025385,EVM0005992,EVM0024896,EVM0021700,EVM0019348,EVM0008066,EVM0014538,EVM0022230,	4.13e-15
brown	Biological process	regulation of biosynthetic process	GO:0009889	5	2.22e-16	5.03726	32	1907	37	11107	EVM0011178,EVM0004230,EVM0024243,EVM0021251,EVM0015936,EVM0023031,EVM0025124,EVM0026418,EVM0000846,EVM0021519,EVM0006308,EVM0018155,EVM0019525,EVM0010150,EVM0018356,EVM0007430,EVM0008240,EVM0004378,EVM0006115,EVM0003728,add_RNAAddG006869,EVM0020467,EVM0009463,EVM0010823,EVM0025385,EVM0005992,EVM0024896,EVM0021700,EVM0019348,EVM0008066,EVM0014538,EVM0022230,	4.13e-15
brown	Biological process	regulation of metabolic process	GO:0019222	4	2.22e-16	3.81193	32	2520	37	11107	EVM0011178,EVM0004230,EVM0024243,EVM0021251,EVM0015936,EVM0023031,EVM0025124,EVM0026418,EVM0000846,EVM0021519,EVM0006308,EVM0018155,EVM0019525,EVM0010150,EVM0018356,EVM0007430,EVM0008240,EVM0004378,EVM0006115,EVM0003728,add_RNAAddG006869,EVM0020467,EVM0009463,EVM0010823,EVM0025385,EVM0005992,EVM0024896,EVM0021700,EVM0019348,EVM0008066,EVM0014538,EVM0022230,	4.13e-15
brown	Biological process	macromolecule biosynthetic process	GO:0009059	5	5.55e-16	3.76118	32	2554	37	11107	EVM0011178,EVM0004230,EVM0024243,EVM0021251,EVM0015936,EVM0023031,EVM0025124,EVM0026418,EVM0000846,EVM0021519,EVM0006308,EVM0018155,EVM0019525,EVM0010150,EVM0018356,EVM0007430,EVM0008240,EVM0004378,EVM0006115,EVM0003728,add_RNAAddG006869,EVM0020467,EVM0009463,EVM0010823,EVM0025385,EVM0005992,EVM0024896,EVM0021700,EVM0019348,EVM0008066,EVM0014538,EVM0022230,	9.04e-15
brown	Biological process	regulation of cellular metabolic process	GO:0031323	5	6.66e-16	4.22244	32	2275	37	11107	EVM0011178,EVM0004230,EVM0024243,EVM0021251,EVM0015936,EVM0023031,EVM0025124,EVM0026418,EVM0000846,EVM0021519,EVM0006308,EVM0018155,EVM0019525,EVM0010150,EVM0018356,EVM0007430,EVM0008240,EVM0004378,EVM0006115,EVM0003728,add_RNAAddG006869,EVM0020467,EVM0009463,EVM0010823,EVM0025385,EVM0005992,EVM0024896,EVM0021700,EVM0019348,EVM0008066,EVM0014538,EVM0022230,	1.04e-14
brown	Biological process	gene expression	GO:0010467	5	8.44e-15	3.40278	32	2823	37	11107	EVM0011178,EVM0004230,EVM0024243,EVM0021251,EVM0015936,EVM0023031,EVM0025124,EVM0026418,EVM0000846,EVM0021519,EVM0006308,EVM0018155,EVM0019525,EVM0010150,EVM0018356,EVM0007430,EVM0008240,EVM0004378,EVM0006115,EVM0003728,add_RNAAddG006869,EVM0020467,EVM0009463,EVM0010823,EVM0025385,EVM0005992,EVM0024896,EVM0021700,EVM0019348,EVM0008066,EVM0014538,EVM0022230,	1.27e-13
brown	Biological process	RNA metabolic process	GO:0016070	7	1.81e-14	3.31815	32	2895	37	11107	EVM0011178,EVM0004230,EVM0024243,EVM0021251,EVM0015936,EVM0023031,EVM0025124,EVM0026418,EVM0000846,EVM0021519,EVM0006308,EVM0018155,EVM0019525,EVM0010150,EVM0018356,EVM0007430,EVM0008240,EVM0004378,EVM0006115,EVM0003728,add_RNAAddG006869,EVM0020467,EVM0009463,EVM0010823,EVM0025385,EVM0005992,EVM0024896,EVM0021700,EVM0019348,EVM0008066,EVM0014538,EVM0022230,	2.62e-13
brown	Biological process	nucleic acid metabolic process	GO:0090304	6	6.54e-13	2.95117	32	3255	37	11107	EVM0011178,EVM0004230,EVM0024243,EVM0021251,EVM0015936,EVM0023031,EVM0025124,EVM0026418,EVM0000846,EVM0021519,EVM0006308,EVM0018155,EVM0019525,EVM0010150,EVM0018356,EVM0007430,EVM0008240,EVM0004378,EVM0006115,EVM0003728,add_RNAAddG006869,EVM0020467,EVM0009463,EVM0010823,EVM0025385,EVM0005992,EVM0024896,EVM0021700,EVM0019348,EVM0008066,EVM0014538,EVM0022230,	9.13e-12
brown	Biological process	cellular biosynthetic process	GO:0044249	4	7.87e-12	2.71664	32	3536	37	11107	EVM0011178,EVM0004230,EVM0024243,EVM0021251,EVM0015936,EVM0023031,EVM0025124,EVM0026418,EVM0000846,EVM0021519,EVM0006308,EVM0018155,EVM0019525,EVM0010150,EVM0018356,EVM0007430,EVM0008240,EVM0004378,EVM0006115,EVM0003728,add_RNAAddG006869,EVM0020467,EVM0009463,EVM0010823,EVM0025385,EVM0005992,EVM0024896,EVM0021700,EVM0019348,EVM0008066,EVM0014538,EVM0022230,	1.06e-10
brown	Biological process	nucleobase-containing compound metabolic process	GO:0006139	5	8.14e-12	2.71357	32	3540	37	11107	EVM0011178,EVM0004230,EVM0024243,EVM0021251,EVM0015936,EVM0023031,EVM0025124,EVM0026418,EVM0000846,EVM0021519,EVM0006308,EVM0018155,EVM0019525,EVM0010150,EVM0018356,EVM0007430,EVM0008240,EVM0004378,EVM0006115,EVM0003728,add_RNAAddG006869,EVM0020467,EVM0009463,EVM0010823,EVM0025385,EVM0005992,EVM0024896,EVM0021700,EVM0019348,EVM0008066,EVM0014538,EVM0022230,	1.06e-10
brown	Biological process	organic substance biosynthetic process	GO:1901576	4	1.92e-11	2.63685	32	3643	37	11107	EVM0011178,EVM0004230,EVM0024243,EVM0021251,EVM0015936,EVM0023031,EVM0025124,EVM0026418,EVM0000846,EVM0021519,EVM0006308,EVM0018155,EVM0019525,EVM0010150,EVM0018356,EVM0007430,EVM0008240,EVM0004378,EVM0006115,EVM0003728,add_RNAAddG006869,EVM0020467,EVM0009463,EVM0010823,EVM0025385,EVM0005992,EVM0024896,EVM0021700,EVM0019348,EVM0008066,EVM0014538,EVM0022230,	2.42e-10
brown	Biological process	regulation of cellular process	GO:0050794	4	1.95e-11	2.49779	33	3966	37	11107	EVM0011178,EVM0004230,EVM0024243,EVM0021251,EVM0015936,EVM0023031,EVM0025124,EVM0026418,EVM0000846,EVM0021519,EVM0006308,EVM0018155,EVM0019525,EVM0010150,EVM0018356,EVM0009410,EVM0007430,EVM0008240,EVM0004378,EVM0006115,EVM0003728,add_RNAAddG006869,EVM0020467,EVM0009463,EVM0010823,EVM0025385,EVM0005992,EVM0024896,EVM0021700,EVM0019348,EVM0008066,EVM0014538,EVM0022230,	2.38e-10
brown	Biological process	biosynthetic process	GO:0009058	3	5.23e-11	2.54938	32	3768	37	11107	EVM0011178,EVM0004230,EVM0024243,EVM0021251,EVM0015936,EVM0023031,EVM0025124,EVM0026418,EVM0000846,EVM0021519,EVM0006308,EVM0018155,EVM0019525,EVM0010150,EVM0018356,EVM0007430,EVM0008240,EVM0004378,EVM0006115,EVM0003728,add_RNAAddG006869,EVM0020467,EVM0009463,EVM0010823,EVM0025385,EVM0005992,EVM0024896,EVM0021700,EVM0019348,EVM0008066,EVM0014538,EVM0022230,	6.2e-10
brown	Biological process	heterocycle metabolic process	GO:0046483	4	6.36e-11	2.53257	32	3793	37	11107	EVM0011178,EVM0004230,EVM0024243,EVM0021251,EVM0015936,EVM0023031,EVM0025124,EVM0026418,EVM0000846,EVM0021519,EVM0006308,EVM0018155,EVM0019525,EVM0010150,EVM0018356,EVM0007430,EVM0008240,EVM0004378,EVM0006115,EVM0003728,add_RNAAddG006869,EVM0020467,EVM0009463,EVM0010823,EVM0025385,EVM0005992,EVM0024896,EVM0021700,EVM0019348,EVM0008066,EVM0014538,EVM0022230,	7.32e-10
brown	Biological process	cellular aromatic compound metabolic process	GO:0006725	4	1.64e-10	2.45303	32	3916	37	11107	EVM0011178,EVM0004230,EVM0024243,EVM0021251,EVM0015936,EVM0023031,EVM0025124,EVM0026418,EVM0000846,EVM0021519,EVM0006308,EVM0018155,EVM0019525,EVM0010150,EVM0018356,EVM0007430,EVM0008240,EVM0004378,EVM0006115,EVM0003728,add_RNAAddG006869,EVM0020467,EVM0009463,EVM0010823,EVM0025385,EVM0005992,EVM0024896,EVM0021700,EVM0019348,EVM0008066,EVM0014538,EVM0022230,	1.83e-09
brown	Biological process	organic cyclic compound metabolic process	GO:1901360	4	3.54e-10	2.38957	32	4020	37	11107	EVM0011178,EVM0004230,EVM0024243,EVM0021251,EVM0015936,EVM0023031,EVM0025124,EVM0026418,EVM0000846,EVM0021519,EVM0006308,EVM0018155,EVM0019525,EVM0010150,EVM0018356,EVM0007430,EVM0008240,EVM0004378,EVM0006115,EVM0003728,add_RNAAddG006869,EVM0020467,EVM0009463,EVM0010823,EVM0025385,EVM0005992,EVM0024896,EVM0021700,EVM0019348,EVM0008066,EVM0014538,EVM0022230,	3.85e-09
brown	Biological process	regulation of biological process	GO:0050789	3	4.75e-10	2.25193	33	4399	37	11107	EVM0011178,EVM0004230,EVM0024243,EVM0021251,EVM0015936,EVM0023031,EVM0025124,EVM0026418,EVM0000846,EVM0021519,EVM0006308,EVM0018155,EVM0019525,EVM0010150,EVM0018356,EVM0009410,EVM0007430,EVM0008240,EVM0004378,EVM0006115,EVM0003728,add_RNAAddG006869,EVM0020467,EVM0009463,EVM0010823,EVM0025385,EVM0005992,EVM0024896,EVM0021700,EVM0019348,EVM0008066,EVM0014538,EVM0022230,	5.02e-09
brown	Biological process	cellular nitrogen compound metabolic process	GO:0034641	4	5.97e-10	2.34752	32	4092	37	11107	EVM0011178,EVM0004230,EVM0024243,EVM0021251,EVM0015936,EVM0023031,EVM0025124,EVM0026418,EVM0000846,EVM0021519,EVM0006308,EVM0018155,EVM0019525,EVM0010150,EVM0018356,EVM0007430,EVM0008240,EVM0004378,EVM0006115,EVM0003728,add_RNAAddG006869,EVM0020467,EVM0009463,EVM0010823,EVM0025385,EVM0005992,EVM0024896,EVM0021700,EVM0019348,EVM0008066,EVM0014538,EVM0022230,	6.14e-09
brown	Biological process	cellular macromolecule metabolic process	GO:0044260	5	4.18e-09	2.19617	32	4374	37	11107	EVM0011178,EVM0004230,EVM0024243,EVM0021251,EVM0015936,EVM0023031,EVM0025124,EVM0026418,EVM0000846,EVM0021519,EVM0006308,EVM0018155,EVM0019525,EVM0010150,EVM0018356,EVM0007430,EVM0008240,EVM0004378,EVM0006115,EVM0003728,add_RNAAddG006869,EVM0020467,EVM0009463,EVM0010823,EVM0025385,EVM0005992,EVM0024896,EVM0021700,EVM0019348,EVM0008066,EVM0014538,EVM0022230,	4.19e-08
brown	Biological process	biological regulation	GO:0065007	2	1.46e-08	2.01183	33	4924	37	11107	EVM0011178,EVM0004230,EVM0024243,EVM0021251,EVM0015936,EVM0023031,EVM0025124,EVM0026418,EVM0000846,EVM0021519,EVM0006308,EVM0018155,EVM0019525,EVM0010150,EVM0018356,EVM0009410,EVM0007430,EVM0008240,EVM0004378,EVM0006115,EVM0003728,add_RNAAddG006869,EVM0020467,EVM0009463,EVM0010823,EVM0025385,EVM0005992,EVM0024896,EVM0021700,EVM0019348,EVM0008066,EVM0014538,EVM0022230,	1.43e-07
brown	Biological process	flower development	GO:0009908	7	1.76e-07	7.17844	11	460	37	11107	EVM0004230,EVM0015936,EVM0021519,EVM0018155,EVM0019525,EVM0010150,EVM0007430,EVM0004378,EVM0006115,EVM0009463,EVM0021700,	1.68e-06
brown	Biological process	reproductive shoot system development	GO:0090567	6	2.43e-07	6.95175	11	475	37	11107	EVM0004230,EVM0015936,EVM0021519,EVM0018155,EVM0019525,EVM0010150,EVM0007430,EVM0004378,EVM0006115,EVM0009463,EVM0021700,	2.26e-06
brown	Biological process	shoot system development	GO:0048367	5	1.83e-06	4.58035	13	852	37	11107	EVM0004230,EVM0015936,EVM0021519,EVM0006308,EVM0018155,EVM0006628,EVM0019525,EVM0010150,EVM0007430,EVM0004378,EVM0006115,EVM0009463,EVM0021700,	1.66e-05
brown	Biological process	macromolecule metabolic process	GO:0043170	4	4.54e-06	1.71506	32	5601	37	11107	EVM0011178,EVM0004230,EVM0024243,EVM0021251,EVM0015936,EVM0023031,EVM0025124,EVM0026418,EVM0000846,EVM0021519,EVM0006308,EVM0018155,EVM0019525,EVM0010150,EVM0018356,EVM0007430,EVM0008240,EVM0004378,EVM0006115,EVM0003728,add_RNAAddG006869,EVM0020467,EVM0009463,EVM0010823,EVM0025385,EVM0005992,EVM0024896,EVM0021700,EVM0019348,EVM0008066,EVM0014538,EVM0022230,	4.04e-05
brown	Biological process	reproductive system development	GO:0061458	5	9.67e-06	3.64181	14	1154	37	11107	EVM0004230,EVM0015936,EVM0000846,EVM0021519,EVM0006308,EVM0018155,EVM0019525,EVM0010150,EVM0007430,EVM0004378,EVM0006115,EVM0003728,EVM0009463,EVM0021700,	8.4e-05
brown	Biological process	reproductive structure development	GO:0048608	4	9.67e-06	3.64181	14	1154	37	11107	EVM0004230,EVM0015936,EVM0000846,EVM0021519,EVM0006308,EVM0018155,EVM0019525,EVM0010150,EVM0007430,EVM0004378,EVM0006115,EVM0003728,EVM0009463,EVM0021700,	8.4e-05
brown	Biological process	developmental process involved in reproduction	GO:0003006	3	1.37e-05	3.29637	15	1366	37	11107	EVM0004230,EVM0015936,EVM0000846,EVM0021519,EVM0006308,EVM0018155,EVM0019525,EVM0010150,EVM0007430,EVM0004378,EVM0006115,EVM0003728,EVM0009463,EVM0021700,EVM0008066,	0.000114179
brown	Biological process	nitrogen compound metabolic process	GO:0006807	3	3.06e-05	1.59808	32	6011	37	11107	EVM0011178,EVM0004230,EVM0024243,EVM0021251,EVM0015936,EVM0023031,EVM0025124,EVM0026418,EVM0000846,EVM0021519,EVM0006308,EVM0018155,EVM0019525,EVM0010150,EVM0018356,EVM0007430,EVM0008240,EVM0004378,EVM0006115,EVM0003728,add_RNAAddG006869,EVM0020467,EVM0009463,EVM0010823,EVM0025385,EVM0005992,EVM0024896,EVM0021700,EVM0019348,EVM0008066,EVM0014538,EVM0022230,	0.000248901
brown	Biological process	floral whorl development	GO:0048438	4	3.67e-05	9.38091	6	192	37	11107	EVM0004230,EVM0021519,EVM0010150,EVM0004378,EVM0009463,EVM0021700,	0.0002815
brown	Biological process	reproductive process	GO:0022414	2	6.33e-05	2.90318	15	1551	37	11107	EVM0004230,EVM0015936,EVM0000846,EVM0021519,EVM0006308,EVM0018155,EVM0019525,EVM0010150,EVM0007430,EVM0004378,EVM0006115,EVM0003728,EVM0009463,EVM0021700,EVM0008066,	0.000475728
brown	Biological process	reproduction	GO:0000003	2	6.77e-05	2.88643	15	1560	37	11107	EVM0004230,EVM0015936,EVM0000846,EVM0021519,EVM0006308,EVM0018155,EVM0019525,EVM0010150,EVM0007430,EVM0004378,EVM0006115,EVM0003728,EVM0009463,EVM0021700,EVM0008066,	0.000499717
brown	Biological process	floral organ development	GO:0048437	5	0.000138787	7.3817	6	244	37	11107	EVM0004230,EVM0021519,EVM0010150,EVM0004378,EVM0009463,EVM0021700,	0.000969034
brown	Biological process	developmental process	GO:0032502	2	0.000155035	2.07436	21	3039	37	11107	EVM0004230,EVM0015936,EVM0025124,EVM0026418,EVM0000846,EVM0021519,EVM0006308,EVM0018155,EVM0006628,EVM0019525,EVM0010150,EVM0007430,EVM0004378,EVM0006115,EVM0003728,EVM0009463,EVM0025385,EVM0005992,EVM0021700,EVM0008066,EVM0014538,	0.00106348
brown	Biological process	system development	GO:0048731	4	0.000157944	2.54802	16	1885	37	11107	EVM0004230,EVM0015936,EVM0000846,EVM0021519,EVM0006308,EVM0018155,EVM0006628,EVM0019525,EVM0010150,EVM0007430,EVM0004378,EVM0006115,EVM0003728,EVM0009463,EVM0021700,EVM0014538,	0.00106476
brown	Biological process	post-embryonic development	GO:0009791	3	0.000246389	2.72722	14	1541	37	11107	EVM0004230,EVM0015936,EVM0000846,EVM0021519,EVM0006308,EVM0018155,EVM0019525,EVM0010150,EVM0007430,EVM0004378,EVM0006115,EVM0003728,EVM0009463,EVM0021700,	0.00163285
brown	Biological process	phyllome development	GO:0048827	5	0.000307494	4.48881	8	535	37	11107	EVM0004230,EVM0021519,EVM0006308,EVM0006628,EVM0010150,EVM0004378,EVM0009463,EVM0021700,	0.00197098
brown	Biological process	multicellular organism development	GO:0007275	4	0.000310113	2.20998	18	2445	37	11107	EVM0004230,EVM0015936,EVM0025124,EVM0000846,EVM0021519,EVM0006308,EVM0018155,EVM0006628,EVM0019525,EVM0010150,EVM0007430,EVM0004378,EVM0006115,EVM0003728,EVM0009463,EVM0021700,EVM0008066,EVM0014538,	0.00195571
brown	Biological process	plant organ morphogenesis	GO:1905392	4	0.000381896	5.05126	7	416	37	11107	EVM0004230,EVM0021519,EVM0006308,EVM0004378,EVM0009463,EVM0021700,EVM0014538,	0.00237018
brown	Biological process	primary metabolic process	GO:0044238	3	0.000424182	1.44409	32	6652	37	11107	EVM0011178,EVM0004230,EVM0024243,EVM0021251,EVM0015936,EVM0023031,EVM0025124,EVM0026418,EVM0000846,EVM0021519,EVM0006308,EVM0018155,EVM0019525,EVM0010150,EVM0018356,EVM0007430,EVM0008240,EVM0004378,EVM0006115,EVM0003728,add_RNAAddG006869,EVM0020467,EVM0009463,EVM0010823,EVM0025385,EVM0005992,EVM0024896,EVM0021700,EVM0019348,EVM0008066,EVM0014538,EVM0022230,	0.00259149
brown	Biological process	gametophyte development	GO:0048229	5	0.000466305	4.8868	7	430	37	11107	EVM0015936,EVM0025124,EVM0000846,EVM0019525,EVM0004378,EVM0009463,EVM0008066,	0.002805
brown	Biological process	pattern specification process	GO:0007389	3	0.000626924	7.11349	5	211	37	11107	EVM0004230,EVM0000846,EVM0021519,EVM0010150,EVM0009463,	0.00371405
brown	Biological process	pollen development	GO:0009555	6	0.00066865	5.50806	6	327	37	11107	EVM0015936,EVM0025124,EVM0000846,EVM0004378,EVM0009463,EVM0008066,	0.00390212
brown	Biological process	anatomical structure development	GO:0048856	3	0.00076304	1.99009	19	2866	37	11107	EVM0004230,EVM0015936,EVM0025124,EVM0000846,EVM0021519,EVM0006308,EVM0018155,EVM0006628,EVM0019525,EVM0010150,EVM0007430,EVM0004378,EVM0006115,EVM0003728,EVM0009463,EVM0005992,EVM0021700,EVM0008066,EVM0014538,	0.00438748
brown	Biological process	multicellular organismal process	GO:0032501	2	0.00114455	1.99609	18	2707	37	11107	EVM0004230,EVM0015936,EVM0025124,EVM0000846,EVM0021519,EVM0006308,EVM0018155,EVM0006628,EVM0019525,EVM0010150,EVM0007430,EVM0004378,EVM0006115,EVM0003728,EVM0009463,EVM0021700,EVM0008066,EVM0014538,	0.00639314
brown	Biological process	cellular metabolic process	GO:0044237	3	0.00192545	1.35832	32	7072	37	11107	EVM0011178,EVM0004230,EVM0024243,EVM0021251,EVM0015936,EVM0023031,EVM0025124,EVM0026418,EVM0000846,EVM0021519,EVM0006308,EVM0018155,EVM0019525,EVM0010150,EVM0018356,EVM0007430,EVM0008240,EVM0004378,EVM0006115,EVM0003728,add_RNAAddG006869,EVM0020467,EVM0009463,EVM0010823,EVM0025385,EVM0005992,EVM0024896,EVM0021700,EVM0019348,EVM0008066,EVM0014538,EVM0022230,	0.010038
brown	Biological process	organic substance metabolic process	GO:0071704	3	0.00193203	1.35813	32	7073	37	11107	EVM0011178,EVM0004230,EVM0024243,EVM0021251,EVM0015936,EVM0023031,EVM0025124,EVM0026418,EVM0000846,EVM0021519,EVM0006308,EVM0018155,EVM0019525,EVM0010150,EVM0018356,EVM0007430,EVM0008240,EVM0004378,EVM0006115,EVM0003728,add_RNAAddG006869,EVM0020467,EVM0009463,EVM0010823,EVM0025385,EVM0005992,EVM0024896,EVM0021700,EVM0019348,EVM0008066,EVM0014538,EVM0022230,	0.00993981
brown	Biological process	positive regulation of DNA-templated transcription	GO:0045893	11	0.00269402	4.19845	6	429	37	11107	EVM0026418,EVM0004378,add_RNAAddG006869,EVM0025385,EVM0014538,EVM0022230,	0.0135046
brown	Biological process	positive regulation of RNA biosynthetic process	GO:1902680	9	0.00345427	3.99365	6	451	37	11107	EVM0026418,EVM0004378,add_RNAAddG006869,EVM0025385,EVM0014538,EVM0022230,	0.0166743
brown	Biological process	positive regulation of nucleic acid-templated transcription	GO:1903508	10	0.00345427	3.99365	6	451	37	11107	EVM0026418,EVM0004378,add_RNAAddG006869,EVM0025385,EVM0014538,EVM0022230,	0.0166743
brown	Biological process	regulation of reproductive process	GO:2000241	4	0.00367766	4.76491	5	315	37	11107	EVM0015936,EVM0007430,EVM0003728,EVM0009463,EVM0008066,	0.0171186
brown	Biological process	regulation of transcription by RNA polymerase II	GO:0006357	11	0.0043688	4.57605	5	328	37	11107	EVM0026418,EVM0004378,EVM0025385,EVM0014538,EVM0022230,	0.0196345
brown	Biological process	plant organ development	GO:0099402	4	0.00506395	2.6644	9	1014	37	11107	EVM0004230,EVM0021519,EVM0006308,EVM0006628,EVM0010150,EVM0004378,EVM0009463,EVM0021700,EVM0014538,	0.0225
brown	Biological process	anatomical structure morphogenesis	GO:0009653	3	0.00554263	2.62812	9	1028	37	11107	EVM0004230,EVM0021519,EVM0006308,EVM0004378,EVM0009463,EVM0005992,EVM0021700,EVM0008066,EVM0014538,	0.0243502
brown	Biological process	positive regulation of macromolecule biosynthetic process	GO:0010557	7	0.00628646	3.53164	6	510	37	11107	EVM0026418,EVM0004378,add_RNAAddG006869,EVM0025385,EVM0014538,EVM0022230,	0.0267175
brown	Biological process	positive regulation of RNA metabolic process	GO:0051254	8	0.00683522	3.4704	6	519	37	11107	EVM0026418,EVM0004378,add_RNAAddG006869,EVM0025385,EVM0014538,EVM0022230,	0.0278393
brown	Biological process	positive regulation of cellular biosynthetic process	GO:0031328	7	0.0074853	3.40479	6	529	37	11107	EVM0026418,EVM0004378,add_RNAAddG006869,EVM0025385,EVM0014538,EVM0022230,	0.0301727
brown	Biological process	positive regulation of gene expression	GO:0010628	7	0.00768884	3.38559	6	532	37	11107	EVM0026418,EVM0004378,add_RNAAddG006869,EVM0025385,EVM0014538,EVM0022230,	0.0306769
brown	Biological process	transcription by RNA polymerase II	GO:0006366	11	0.00790709	3.97076	5	378	37	11107	EVM0026418,EVM0004378,EVM0025385,EVM0014538,EVM0022230,	0.031229
brown	Biological process	positive regulation of biosynthetic process	GO:0009891	6	0.00922851	3.25703	6	553	37	11107	EVM0026418,EVM0004378,add_RNAAddG006869,EVM0025385,EVM0014538,EVM0022230,	0.035376
brown	Biological process	positive regulation of nucleobase-containing compound metabolic process	GO:0045935	7	0.00962577	3.22784	6	558	37	11107	EVM0026418,EVM0004378,add_RNAAddG006869,EVM0025385,EVM0014538,EVM0022230,	0.0365405
brown	Biological process	cellular developmental process	GO:0048869	3	0.0103366	2.57397	8	933	37	11107	EVM0026418,EVM0006308,EVM0019525,EVM0004378,EVM0009463,EVM0025385,EVM0008066,EVM0014538,	0.0384917
brown	Biological process	cell differentiation	GO:0030154	4	0.0114826	2.76854	7	759	37	11107	EVM0026418,EVM0006308,EVM0004378,EVM0009463,EVM0025385,EVM0008066,EVM0014538,	0.0415713
brown	Biological process	regulation of developmental process	GO:0050793	4	0.0142017	2.65654	7	791	37	11107	EVM0015936,EVM0006308,EVM0019525,EVM0007430,EVM0003728,EVM0009463,EVM0008066,	0.0491405
brown	Biological process	metabolic process	GO:0008152	2	0.015141	1.24238	32	7732	37	11107	EVM0011178,EVM0004230,EVM0024243,EVM0021251,EVM0015936,EVM0023031,EVM0025124,EVM0026418,EVM0000846,EVM0021519,EVM0006308,EVM0018155,EVM0019525,EVM0010150,EVM0018356,EVM0007430,EVM0008240,EVM0004378,EVM0006115,EVM0003728,add_RNAAddG006869,EVM0020467,EVM0009463,EVM0010823,EVM0025385,EVM0005992,EVM0024896,EVM0021700,EVM0019348,EVM0008066,EVM0014538,EVM0022230,	0.0519311
brown	Biological process	regulation of multicellular organismal process	GO:0051239	4	0.0222382	2.68426	6	671	37	11107	EVM0015936,EVM0019525,EVM0007430,EVM0003728,EVM0009463,EVM0008066,	0.0718606
brown	Biological process	positive regulation of nitrogen compound metabolic process	GO:0051173	6	0.0296566	2.51204	6	717	37	11107	EVM0026418,EVM0004378,add_RNAAddG006869,EVM0025385,EVM0014538,EVM0022230,	0.0891978
brown	Biological process	positive regulation of cellular metabolic process	GO:0031325	6	0.0369131	2.38561	6	755	37	11107	EVM0026418,EVM0004378,add_RNAAddG006869,EVM0025385,EVM0014538,EVM0022230,	0.106911
brown	Biological process	positive regulation of macromolecule metabolic process	GO:0010604	6	0.0411625	2.32405	6	775	37	11107	EVM0026418,EVM0004378,add_RNAAddG006869,EVM0025385,EVM0014538,EVM0022230,	0.114961
cyan	Molecular function	DNA binding	GO:0003677	5	0	5.98549	40	965	65	9386	EVM0026787,EVM0001407,EVM0022626,EVM0021493,EVM0004520,EVM0024073,EVM0020705,EVM0016453,EVM0011962,EVM0025395,EVM0004337,EVM0006630,EVM0000014,EVM0004858,EVM0027735,EVM0015193,EVM0012401,EVM0002390,EVM0000266,EVM0016034,EVM0014019,EVM0007545,EVM0017077,EVM0023078,EVM0009579,EVM0005937,EVM0019008,EVM0016256,EVM0025354,EVM0008851,EVM0020736,EVM0016488,EVM0008850,EVM0024380,EVM0027253,EVM0027884,EVM…	0
cyan	Molecular function	sequence-specific DNA binding	GO:0043565	6	1.11e-16	7.85536	34	625	65	9386	EVM0026787,EVM0001407,EVM0022626,EVM0021493,EVM0004520,EVM0024073,EVM0020705,EVM0016453,EVM0011962,EVM0025395,EVM0004337,EVM0000014,EVM0004858,EVM0027735,EVM0015193,EVM0012401,EVM0002390,EVM0000266,EVM0016034,EVM0014019,EVM0017077,EVM0023078,EVM0009579,EVM0019008,EVM0016256,EVM0025354,EVM0008851,EVM0020736,EVM0016488,EVM0008850,EVM0024380,EVM0016635,EVM0017601,EVM0022473,	2.39e-15
cyan	Molecular function	transcription regulator activity	GO:0140110	2	2.22e-16	7.21409	61	1221	65	9386	EVM0001762,EVM0005564,EVM0026787,EVM0005202,EVM0025733,EVM0001407,EVM0022626,EVM0021493,EVM0004520,EVM0024073,EVM0004007,EVM0020705,EVM0016453,EVM0011962,EVM0025395,EVM0004337,EVM0006630,EVM0000014,EVM0004858,EVM0027735,EVM0015193,EVM0016202,EVM0012408,EVM0003893,EVM0000266,EVM0016034,EVM0020135,EVM0014019,EVM0003464,EVM0005002,EVM0000597,EVM0007545,EVM0002416,EVM0017077,EVM0015577,EVM0023477,EVM…	3.18e-15
cyan	Molecular function	DNA-binding transcription factor activity	GO:0003700	3	5.55e-16	7.68621	61	1146	65	9386	EVM0001762,EVM0005564,EVM0026787,EVM0005202,EVM0025733,EVM0001407,EVM0022626,EVM0021493,EVM0004520,EVM0024073,EVM0004007,EVM0020705,EVM0016453,EVM0011962,EVM0025395,EVM0004337,EVM0006630,EVM0000014,EVM0004858,EVM0027735,EVM0015193,EVM0016202,EVM0012408,EVM0003893,EVM0000266,EVM0016034,EVM0020135,EVM0014019,EVM0003464,EVM0005002,EVM0000597,EVM0007545,EVM0002416,EVM0017077,EVM0015577,EVM0023477,EVM…	5.97e-15
cyan	Molecular function	transcription cis-regulatory region binding	GO:0000976	8	4.73e-14	8.56973	20	337	65	9386	EVM0001407,EVM0022626,EVM0004520,EVM0020705,EVM0016453,EVM0011962,EVM0004337,EVM0004858,EVM0027735,EVM0012401,EVM0000266,EVM0016034,EVM0017077,EVM0025354,EVM0020736,EVM0016488,EVM0008850,EVM0024380,EVM0016635,EVM0017601,	4.07e-13
cyan	Molecular function	transcription regulatory region nucleic acid binding	GO:0001067	5	4.73e-14	8.56973	20	337	65	9386	EVM0001407,EVM0022626,EVM0004520,EVM0020705,EVM0016453,EVM0011962,EVM0004337,EVM0004858,EVM0027735,EVM0012401,EVM0000266,EVM0016034,EVM0017077,EVM0025354,EVM0020736,EVM0016488,EVM0008850,EVM0024380,EVM0016635,EVM0017601,	4.07e-13
cyan	Molecular function	sequence-specific double-stranded DNA binding	GO:1990837	7	2.49e-13	7.84783	20	368	65	9386	EVM0001407,EVM0022626,EVM0004520,EVM0020705,EVM0016453,EVM0011962,EVM0004337,EVM0004858,EVM0027735,EVM0012401,EVM0000266,EVM0016034,EVM0017077,EVM0025354,EVM0020736,EVM0016488,EVM0008850,EVM0024380,EVM0016635,EVM0017601,	1.53e-12
cyan	Molecular function	double-stranded DNA binding	GO:0003690	6	1.27e-12	6.6793	21	454	65	9386	EVM0001407,EVM0022626,EVM0004520,EVM0020705,EVM0016453,EVM0011962,EVM0004337,EVM0004858,EVM0027735,EVM0012401,EVM0000266,EVM0016034,EVM0017077,EVM0005937,EVM0025354,EVM0020736,EVM0016488,EVM0008850,EVM0024380,EVM0016635,EVM0017601,	6.81e-12
cyan	Molecular function	nucleic acid binding	GO:0003676	4	9e-12	2.76894	40	2086	65	9386	EVM0026787,EVM0001407,EVM0022626,EVM0021493,EVM0004520,EVM0024073,EVM0020705,EVM0016453,EVM0011962,EVM0025395,EVM0004337,EVM0006630,EVM0000014,EVM0004858,EVM0027735,EVM0015193,EVM0012401,EVM0002390,EVM0000266,EVM0016034,EVM0014019,EVM0007545,EVM0017077,EVM0023078,EVM0009579,EVM0005937,EVM0019008,EVM0016256,EVM0025354,EVM0008851,EVM0020736,EVM0016488,EVM0008850,EVM0024380,EVM0027253,EVM0027884,EVM…	4.3e-11
cyan	Molecular function	heterocyclic compound binding	GO:1901363	3	1.14e-09	2.38875	40	2418	65	9386	EVM0026787,EVM0001407,EVM0022626,EVM0021493,EVM0004520,EVM0024073,EVM0020705,EVM0016453,EVM0011962,EVM0025395,EVM0004337,EVM0006630,EVM0000014,EVM0004858,EVM0027735,EVM0015193,EVM0012401,EVM0002390,EVM0000266,EVM0016034,EVM0014019,EVM0007545,EVM0017077,EVM0023078,EVM0009579,EVM0005937,EVM0019008,EVM0016256,EVM0025354,EVM0008851,EVM0020736,EVM0016488,EVM0008850,EVM0024380,EVM0027253,EVM0027884,EVM…	4.89e-09
cyan	Molecular function	organic cyclic compound binding	GO:0097159	3	1.26e-09	2.38087	40	2426	65	9386	EVM0026787,EVM0001407,EVM0022626,EVM0021493,EVM0004520,EVM0024073,EVM0020705,EVM0016453,EVM0011962,EVM0025395,EVM0004337,EVM0006630,EVM0000014,EVM0004858,EVM0027735,EVM0015193,EVM0012401,EVM0002390,EVM0000266,EVM0016034,EVM0014019,EVM0007545,EVM0017077,EVM0023078,EVM0009579,EVM0005937,EVM0019008,EVM0016256,EVM0025354,EVM0008851,EVM0020736,EVM0016488,EVM0008850,EVM0024380,EVM0027253,EVM0027884,EVM…	4.94e-09
cyan	Molecular function	obsolete transcription factor activity, transcription factor binding	GO:0000989	0	3.02e-07	11.9093	8	97	65	9386	EVM0004520,EVM0027735,EVM0017077,EVM0016488,EVM0009026,EVM0024380,EVM0024812,EVM0017601,	1.08e-06
cyan	Molecular function	obsolete transcription factor activity, protein binding	GO:0000988	0	7.98e-07	10.5018	8	110	65	9386	EVM0004520,EVM0027735,EVM0017077,EVM0016488,EVM0009026,EVM0024380,EVM0024812,EVM0017601,	2.64e-06
cyan	Molecular function	obsolete transcription regulator recruiting activity	GO:0001134	0	1.76e-05	10.83	6	80	65	9386	EVM0004520,EVM0027735,EVM0017077,EVM0016488,EVM0024380,EVM0017601,	5.39e-05
cyan	Molecular function	obsolete RNA polymerase II transcription regulator recruiting activity	GO:0001135	0	1.76e-05	10.83	6	80	65	9386	EVM0004520,EVM0027735,EVM0017077,EVM0016488,EVM0024380,EVM0017601,	5.39e-05
cyan	Molecular function	obsolete transcription factor activity, RNA polymerase II transcription factor binding	GO:0001076	0	3.67e-05	9.52088	6	91	65	9386	EVM0004520,EVM0027735,EVM0017077,EVM0016488,EVM0024380,EVM0017601,	9.86e-05
cyan	Molecular function	DNA-binding transcription factor activity, RNA polymerase II-specific	GO:0000981	4	7.74e-05	6.69404	7	151	65	9386	EVM0004520,EVM0020705,EVM0027735,EVM0017077,EVM0016488,EVM0024380,EVM0017601,	0.000195669
cyan	Molecular function	binding	GO:0005488	2	0.00452171	1.36446	41	4339	65	9386	EVM0026787,EVM0001407,EVM0022626,EVM0021493,EVM0004520,EVM0024073,EVM0020705,EVM0016453,EVM0011962,EVM0025395,EVM0004337,EVM0006630,EVM0000014,EVM0004858,EVM0027735,EVM0015193,EVM0016202,EVM0012401,EVM0002390,EVM0000266,EVM0016034,EVM0014019,EVM0007545,EVM0017077,EVM0023078,EVM0009579,EVM0005937,EVM0019008,EVM0016256,EVM0025354,EVM0008851,EVM0020736,EVM0016488,EVM0008850,EVM0024380,EVM0027253,EVM…	0.0102333
cyan	Molecular function	protein dimerization activity	GO:0046983	4	0.0371302	2.70412	5	267	65	9386	EVM0016202,EVM0007545,EVM0023078,EVM0016256,EVM0020736,	0.0725727
cyan	Cellular component	nucleus	GO:0005634	6	0	3.1693	51	3448	52	11142	EVM0001762,EVM0026787,EVM0005202,EVM0025733,EVM0001407,EVM0021493,EVM0004520,EVM0024073,EVM0004007,EVM0020705,EVM0016453,EVM0011962,EVM0025395,EVM0004337,EVM0006630,EVM0004858,EVM0027735,EVM0015193,EVM0016202,EVM0012401,EVM0003893,EVM0000266,EVM0016034,EVM0014019,EVM0005002,EVM0000597,EVM0007545,EVM0017077,EVM0019895,EVM0015577,EVM0023078,EVM0001282,EVM0014907,EVM0009579,EVM0005937,EVM0019008,EVM…	0
cyan	Cellular component	intracellular membrane-bounded organelle	GO:0043231	5	1.5e-08	1.4127	52	7887	52	11142	EVM0001762,EVM0026787,EVM0005202,EVM0025733,EVM0001407,EVM0021493,EVM0004520,EVM0024073,EVM0004007,EVM0020705,EVM0016453,EVM0011962,EVM0025395,EVM0004337,EVM0006630,EVM0004858,EVM0027735,EVM0015193,EVM0016202,EVM0012401,EVM0003893,EVM0000266,EVM0016034,EVM0014019,EVM0005002,EVM0000597,EVM0007545,EVM0017077,EVM0019895,EVM0015577,EVM0023078,EVM0001282,EVM0014907,EVM0009579,EVM0005937,EVM0019008,EVM…	3e-07
cyan	Cellular component	membrane-bounded organelle	GO:0043227	4	1.84e-08	1.40717	52	7918	52	11142	EVM0001762,EVM0026787,EVM0005202,EVM0025733,EVM0001407,EVM0021493,EVM0004520,EVM0024073,EVM0004007,EVM0020705,EVM0016453,EVM0011962,EVM0025395,EVM0004337,EVM0006630,EVM0004858,EVM0027735,EVM0015193,EVM0016202,EVM0012401,EVM0003893,EVM0000266,EVM0016034,EVM0014019,EVM0005002,EVM0000597,EVM0007545,EVM0017077,EVM0019895,EVM0015577,EVM0023078,EVM0001282,EVM0014907,EVM0009579,EVM0005937,EVM0019008,EVM…	2.45e-07
cyan	Cellular component	intracellular organelle	GO:0043229	4	1.03e-07	1.36144	52	8184	52	11142	EVM0001762,EVM0026787,EVM0005202,EVM0025733,EVM0001407,EVM0021493,EVM0004520,EVM0024073,EVM0004007,EVM0020705,EVM0016453,EVM0011962,EVM0025395,EVM0004337,EVM0006630,EVM0004858,EVM0027735,EVM0015193,EVM0016202,EVM0012401,EVM0003893,EVM0000266,EVM0016034,EVM0014019,EVM0005002,EVM0000597,EVM0007545,EVM0017077,EVM0019895,EVM0015577,EVM0023078,EVM0001282,EVM0014907,EVM0009579,EVM0005937,EVM0019008,EVM…	1.03e-06
cyan	Cellular component	organelle	GO:0043226	3	1.21e-07	1.35729	52	8209	52	11142	EVM0001762,EVM0026787,EVM0005202,EVM0025733,EVM0001407,EVM0021493,EVM0004520,EVM0024073,EVM0004007,EVM0020705,EVM0016453,EVM0011962,EVM0025395,EVM0004337,EVM0006630,EVM0004858,EVM0027735,EVM0015193,EVM0016202,EVM0012401,EVM0003893,EVM0000266,EVM0016034,EVM0014019,EVM0005002,EVM0000597,EVM0007545,EVM0017077,EVM0019895,EVM0015577,EVM0023078,EVM0001282,EVM0014907,EVM0009579,EVM0005937,EVM0019008,EVM…	9.67e-07
cyan	Cellular component	obsolete intracellular part	GO:0044424	0	7.04e-05	1.20129	52	9275	52	11142	EVM0001762,EVM0026787,EVM0005202,EVM0025733,EVM0001407,EVM0021493,EVM0004520,EVM0024073,EVM0004007,EVM0020705,EVM0016453,EVM0011962,EVM0025395,EVM0004337,EVM0006630,EVM0004858,EVM0027735,EVM0015193,EVM0016202,EVM0012401,EVM0003893,EVM0000266,EVM0016034,EVM0014019,EVM0005002,EVM0000597,EVM0007545,EVM0017077,EVM0019895,EVM0015577,EVM0023078,EVM0001282,EVM0014907,EVM0009579,EVM0005937,EVM0019008,EVM…	0.00046958
cyan	Cellular component	intracellular anatomical structure	GO:0005622	3	8.62e-05	1.19665	52	9311	52	11142	EVM0001762,EVM0026787,EVM0005202,EVM0025733,EVM0001407,EVM0021493,EVM0004520,EVM0024073,EVM0004007,EVM0020705,EVM0016453,EVM0011962,EVM0025395,EVM0004337,EVM0006630,EVM0004858,EVM0027735,EVM0015193,EVM0016202,EVM0012401,EVM0003893,EVM0000266,EVM0016034,EVM0014019,EVM0005002,EVM0000597,EVM0007545,EVM0017077,EVM0019895,EVM0015577,EVM0023078,EVM0001282,EVM0014907,EVM0009579,EVM0005937,EVM0019008,EVM…	0.000492593
cyan	Biological process	RNA biosynthetic process	GO:0032774	8	0	6.22384	66	1707	69	11107	EVM0001762,EVM0005564,EVM0026787,EVM0005202,EVM0025733,EVM0001407,EVM0022626,EVM0014963,EVM0021493,EVM0004520,EVM0024073,EVM0004007,EVM0020705,EVM0016453,EVM0011962,EVM0025395,EVM0004337,EVM0001102,EVM0006630,EVM0000014,EVM0004858,EVM0027735,EVM0015193,EVM0016202,EVM0012401,EVM0012408,EVM0002390,EVM0003893,EVM0000266,EVM0016034,EVM0020135,EVM0014019,EVM0003464,EVM0005002,EVM0000597,EVM0007545,EVM…	0
cyan	Biological process	organic substance biosynthetic process	GO:1901576	4	0	2.9163	66	3643	69	11107	EVM0001762,EVM0005564,EVM0026787,EVM0005202,EVM0025733,EVM0001407,EVM0022626,EVM0014963,EVM0021493,EVM0004520,EVM0024073,EVM0004007,EVM0020705,EVM0016453,EVM0011962,EVM0025395,EVM0004337,EVM0001102,EVM0006630,EVM0000014,EVM0004858,EVM0027735,EVM0015193,EVM0016202,EVM0012401,EVM0012408,EVM0002390,EVM0003893,EVM0000266,EVM0016034,EVM0020135,EVM0014019,EVM0003464,EVM0005002,EVM0000597,EVM0007545,EVM…	0
cyan	Biological process	regulation of RNA metabolic process	GO:0051252	7	0	6.134	66	1732	69	11107	EVM0001762,EVM0005564,EVM0026787,EVM0005202,EVM0025733,EVM0001407,EVM0022626,EVM0014963,EVM0021493,EVM0004520,EVM0024073,EVM0004007,EVM0020705,EVM0016453,EVM0011962,EVM0025395,EVM0004337,EVM0001102,EVM0006630,EVM0000014,EVM0004858,EVM0027735,EVM0015193,EVM0016202,EVM0012401,EVM0012408,EVM0002390,EVM0003893,EVM0000266,EVM0016034,EVM0020135,EVM0014019,EVM0003464,EVM0005002,EVM0000597,EVM0007545,EVM…	0
cyan	Biological process	macromolecule metabolic process	GO:0043170	4	0	1.89682	66	5601	69	11107	EVM0001762,EVM0005564,EVM0026787,EVM0005202,EVM0025733,EVM0001407,EVM0022626,EVM0014963,EVM0021493,EVM0004520,EVM0024073,EVM0004007,EVM0020705,EVM0016453,EVM0011962,EVM0025395,EVM0004337,EVM0001102,EVM0006630,EVM0000014,EVM0004858,EVM0027735,EVM0015193,EVM0016202,EVM0012401,EVM0012408,EVM0002390,EVM0003893,EVM0000266,EVM0016034,EVM0020135,EVM0014019,EVM0003464,EVM0005002,EVM0000597,EVM0007545,EVM…	0
cyan	Biological process	nucleic acid metabolic process	GO:0090304	6	0	3.26393	66	3255	69	11107	EVM0001762,EVM0005564,EVM0026787,EVM0005202,EVM0025733,EVM0001407,EVM0022626,EVM0014963,EVM0021493,EVM0004520,EVM0024073,EVM0004007,EVM0020705,EVM0016453,EVM0011962,EVM0025395,EVM0004337,EVM0001102,EVM0006630,EVM0000014,EVM0004858,EVM0027735,EVM0015193,EVM0016202,EVM0012401,EVM0012408,EVM0002390,EVM0003893,EVM0000266,EVM0016034,EVM0020135,EVM0014019,EVM0003464,EVM0005002,EVM0000597,EVM0007545,EVM…	0
cyan	Biological process	regulation of DNA-templated transcription	GO:0006355	10	0	6.69023	66	1588	69	11107	EVM0001762,EVM0005564,EVM0026787,EVM0005202,EVM0025733,EVM0001407,EVM0022626,EVM0014963,EVM0021493,EVM0004520,EVM0024073,EVM0004007,EVM0020705,EVM0016453,EVM0011962,EVM0025395,EVM0004337,EVM0001102,EVM0006630,EVM0000014,EVM0004858,EVM0027735,EVM0015193,EVM0016202,EVM0012401,EVM0012408,EVM0002390,EVM0003893,EVM0000266,EVM0016034,EVM0020135,EVM0014019,EVM0003464,EVM0005002,EVM0000597,EVM0007545,EVM…	0
cyan	Biological process	cellular biosynthetic process	GO:0044249	4	0	3.00455	66	3536	69	11107	EVM0001762,EVM0005564,EVM0026787,EVM0005202,EVM0025733,EVM0001407,EVM0022626,EVM0014963,EVM0021493,EVM0004520,EVM0024073,EVM0004007,EVM0020705,EVM0016453,EVM0011962,EVM0025395,EVM0004337,EVM0001102,EVM0006630,EVM0000014,EVM0004858,EVM0027735,EVM0015193,EVM0016202,EVM0012401,EVM0012408,EVM0002390,EVM0003893,EVM0000266,EVM0016034,EVM0020135,EVM0014019,EVM0003464,EVM0005002,EVM0000597,EVM0007545,EVM…	0
cyan	Biological process	regulation of primary metabolic process	GO:0080090	5	0	4.82474	66	2202	69	11107	EVM0001762,EVM0005564,EVM0026787,EVM0005202,EVM0025733,EVM0001407,EVM0022626,EVM0014963,EVM0021493,EVM0004520,EVM0024073,EVM0004007,EVM0020705,EVM0016453,EVM0011962,EVM0025395,EVM0004337,EVM0001102,EVM0006630,EVM0000014,EVM0004858,EVM0027735,EVM0015193,EVM0016202,EVM0012401,EVM0012408,EVM0002390,EVM0003893,EVM0000266,EVM0016034,EVM0020135,EVM0014019,EVM0003464,EVM0005002,EVM0000597,EVM0007545,EVM…	0
cyan	Biological process	cellular macromolecule metabolic process	GO:0044260	5	0	2.42892	66	4374	69	11107	EVM0001762,EVM0005564,EVM0026787,EVM0005202,EVM0025733,EVM0001407,EVM0022626,EVM0014963,EVM0021493,EVM0004520,EVM0024073,EVM0004007,EVM0020705,EVM0016453,EVM0011962,EVM0025395,EVM0004337,EVM0001102,EVM0006630,EVM0000014,EVM0004858,EVM0027735,EVM0015193,EVM0016202,EVM0012401,EVM0012408,EVM0002390,EVM0003893,EVM0000266,EVM0016034,EVM0020135,EVM0014019,EVM0003464,EVM0005002,EVM0000597,EVM0007545,EVM…	0
cyan	Biological process	regulation of RNA biosynthetic process	GO:2001141	8	0	6.57025	66	1617	69	11107	EVM0001762,EVM0005564,EVM0026787,EVM0005202,EVM0025733,EVM0001407,EVM0022626,EVM0014963,EVM0021493,EVM0004520,EVM0024073,EVM0004007,EVM0020705,EVM0016453,EVM0011962,EVM0025395,EVM0004337,EVM0001102,EVM0006630,EVM0000014,EVM0004858,EVM0027735,EVM0015193,EVM0016202,EVM0012401,EVM0012408,EVM0002390,EVM0003893,EVM0000266,EVM0016034,EVM0020135,EVM0014019,EVM0003464,EVM0005002,EVM0000597,EVM0007545,EVM…	0
cyan	Biological process	regulation of cellular macromolecule biosynthetic process	GO:2000112	7	0	6.04672	66	1757	69	11107	EVM0001762,EVM0005564,EVM0026787,EVM0005202,EVM0025733,EVM0001407,EVM0022626,EVM0014963,EVM0021493,EVM0004520,EVM0024073,EVM0004007,EVM0020705,EVM0016453,EVM0011962,EVM0025395,EVM0004337,EVM0001102,EVM0006630,EVM0000014,EVM0004858,EVM0027735,EVM0015193,EVM0016202,EVM0012401,EVM0012408,EVM0002390,EVM0003893,EVM0000266,EVM0016034,EVM0020135,EVM0014019,EVM0003464,EVM0005002,EVM0000597,EVM0007545,EVM…	0
cyan	Biological process	cellular nitrogen compound biosynthetic process	GO:0044271	5	0	4.19096	66	2535	69	11107	EVM0001762,EVM0005564,EVM0026787,EVM0005202,EVM0025733,EVM0001407,EVM0022626,EVM0014963,EVM0021493,EVM0004520,EVM0024073,EVM0004007,EVM0020705,EVM0016453,EVM0011962,EVM0025395,EVM0004337,EVM0001102,EVM0006630,EVM0000014,EVM0004858,EVM0027735,EVM0015193,EVM0016202,EVM0012401,EVM0012408,EVM0002390,EVM0003893,EVM0000266,EVM0016034,EVM0020135,EVM0014019,EVM0003464,EVM0005002,EVM0000597,EVM0007545,EVM…	0
cyan	Biological process	nucleic acid-templated transcription	GO:0097659	9	0	6.2753	66	1693	69	11107	EVM0001762,EVM0005564,EVM0026787,EVM0005202,EVM0025733,EVM0001407,EVM0022626,EVM0014963,EVM0021493,EVM0004520,EVM0024073,EVM0004007,EVM0020705,EVM0016453,EVM0011962,EVM0025395,EVM0004337,EVM0001102,EVM0006630,EVM0000014,EVM0004858,EVM0027735,EVM0015193,EVM0016202,EVM0012401,EVM0012408,EVM0002390,EVM0003893,EVM0000266,EVM0016034,EVM0020135,EVM0014019,EVM0003464,EVM0005002,EVM0000597,EVM0007545,EVM…	0
cyan	Biological process	heterocycle metabolic process	GO:0046483	4	0	2.80097	66	3793	69	11107	EVM0001762,EVM0005564,EVM0026787,EVM0005202,EVM0025733,EVM0001407,EVM0022626,EVM0014963,EVM0021493,EVM0004520,EVM0024073,EVM0004007,EVM0020705,EVM0016453,EVM0011962,EVM0025395,EVM0004337,EVM0001102,EVM0006630,EVM0000014,EVM0004858,EVM0027735,EVM0015193,EVM0016202,EVM0012401,EVM0012408,EVM0002390,EVM0003893,EVM0000266,EVM0016034,EVM0020135,EVM0014019,EVM0003464,EVM0005002,EVM0000597,EVM0007545,EVM…	0
cyan	Biological process	cellular aromatic compound metabolic process	GO:0006725	4	0	2.71299	66	3916	69	11107	EVM0001762,EVM0005564,EVM0026787,EVM0005202,EVM0025733,EVM0001407,EVM0022626,EVM0014963,EVM0021493,EVM0004520,EVM0024073,EVM0004007,EVM0020705,EVM0016453,EVM0011962,EVM0025395,EVM0004337,EVM0001102,EVM0006630,EVM0000014,EVM0004858,EVM0027735,EVM0015193,EVM0016202,EVM0012401,EVM0012408,EVM0002390,EVM0003893,EVM0000266,EVM0016034,EVM0020135,EVM0014019,EVM0003464,EVM0005002,EVM0000597,EVM0007545,EVM…	0
cyan	Biological process	regulation of cellular metabolic process	GO:0031323	5	0	4.74068	67	2275	69	11107	EVM0001762,EVM0005564,EVM0026787,EVM0005202,EVM0025733,EVM0001407,EVM0022626,EVM0014963,EVM0021493,EVM0004520,EVM0024073,EVM0004007,EVM0020705,EVM0016453,EVM0011962,EVM0025395,EVM0004337,EVM0001102,EVM0006630,EVM0000014,EVM0004858,EVM0027735,EVM0015193,EVM0016202,EVM0012401,EVM0012408,EVM0002390,EVM0003893,EVM0000266,EVM0016034,EVM0020135,EVM0014019,EVM0003464,EVM0005002,EVM0000597,EVM0007545,EVM…	0
cyan	Biological process	regulation of cellular process	GO:0050794	4	0	2.71938	67	3966	69	11107	EVM0001762,EVM0005564,EVM0026787,EVM0005202,EVM0025733,EVM0001407,EVM0022626,EVM0014963,EVM0021493,EVM0004520,EVM0024073,EVM0004007,EVM0020705,EVM0016453,EVM0011962,EVM0025395,EVM0004337,EVM0001102,EVM0006630,EVM0000014,EVM0004858,EVM0027735,EVM0015193,EVM0016202,EVM0012401,EVM0012408,EVM0002390,EVM0003893,EVM0000266,EVM0016034,EVM0020135,EVM0014019,EVM0003464,EVM0005002,EVM0000597,EVM0007545,EVM…	0
cyan	Biological process	regulation of biosynthetic process	GO:0009889	5	0	5.5711	66	1907	69	11107	EVM0001762,EVM0005564,EVM0026787,EVM0005202,EVM0025733,EVM0001407,EVM0022626,EVM0014963,EVM0021493,EVM0004520,EVM0024073,EVM0004007,EVM0020705,EVM0016453,EVM0011962,EVM0025395,EVM0004337,EVM0001102,EVM0006630,EVM0000014,EVM0004858,EVM0027735,EVM0015193,EVM0016202,EVM0012401,EVM0012408,EVM0002390,EVM0003893,EVM0000266,EVM0016034,EVM0020135,EVM0014019,EVM0003464,EVM0005002,EVM0000597,EVM0007545,EVM…	0
cyan	Biological process	heterocycle biosynthetic process	GO:0018130	5	0	4.9072	66	2165	69	11107	EVM0001762,EVM0005564,EVM0026787,EVM0005202,EVM0025733,EVM0001407,EVM0022626,EVM0014963,EVM0021493,EVM0004520,EVM0024073,EVM0004007,EVM0020705,EVM0016453,EVM0011962,EVM0025395,EVM0004337,EVM0001102,EVM0006630,EVM0000014,EVM0004858,EVM0027735,EVM0015193,EVM0016202,EVM0012401,EVM0012408,EVM0002390,EVM0003893,EVM0000266,EVM0016034,EVM0020135,EVM0014019,EVM0003464,EVM0005002,EVM0000597,EVM0007545,EVM…	0
cyan	Biological process	regulation of metabolic process	GO:0019222	4	0	4.27978	67	2520	69	11107	EVM0001762,EVM0005564,EVM0026787,EVM0005202,EVM0025733,EVM0001407,EVM0022626,EVM0014963,EVM0021493,EVM0004520,EVM0024073,EVM0004007,EVM0020705,EVM0016453,EVM0011962,EVM0025395,EVM0004337,EVM0001102,EVM0006630,EVM0000014,EVM0004858,EVM0027735,EVM0015193,EVM0016202,EVM0012401,EVM0012408,EVM0002390,EVM0003893,EVM0000266,EVM0016034,EVM0020135,EVM0014019,EVM0003464,EVM0005002,EVM0000597,EVM0007545,EVM…	0
cyan	Biological process	organic cyclic compound metabolic process	GO:1901360	4	0	2.64281	66	4020	69	11107	EVM0001762,EVM0005564,EVM0026787,EVM0005202,EVM0025733,EVM0001407,EVM0022626,EVM0014963,EVM0021493,EVM0004520,EVM0024073,EVM0004007,EVM0020705,EVM0016453,EVM0011962,EVM0025395,EVM0004337,EVM0001102,EVM0006630,EVM0000014,EVM0004858,EVM0027735,EVM0015193,EVM0016202,EVM0012401,EVM0012408,EVM0002390,EVM0003893,EVM0000266,EVM0016034,EVM0020135,EVM0014019,EVM0003464,EVM0005002,EVM0000597,EVM0007545,EVM…	0
cyan	Biological process	organic cyclic compound biosynthetic process	GO:1901362	5	0	4.54021	66	2340	69	11107	EVM0001762,EVM0005564,EVM0026787,EVM0005202,EVM0025733,EVM0001407,EVM0022626,EVM0014963,EVM0021493,EVM0004520,EVM0024073,EVM0004007,EVM0020705,EVM0016453,EVM0011962,EVM0025395,EVM0004337,EVM0001102,EVM0006630,EVM0000014,EVM0004858,EVM0027735,EVM0015193,EVM0016202,EVM0012401,EVM0012408,EVM0002390,EVM0003893,EVM0000266,EVM0016034,EVM0020135,EVM0014019,EVM0003464,EVM0005002,EVM0000597,EVM0007545,EVM…	0
cyan	Biological process	cellular nitrogen compound metabolic process	GO:0034641	4	0	2.59631	66	4092	69	11107	EVM0001762,EVM0005564,EVM0026787,EVM0005202,EVM0025733,EVM0001407,EVM0022626,EVM0014963,EVM0021493,EVM0004520,EVM0024073,EVM0004007,EVM0020705,EVM0016453,EVM0011962,EVM0025395,EVM0004337,EVM0001102,EVM0006630,EVM0000014,EVM0004858,EVM0027735,EVM0015193,EVM0016202,EVM0012401,EVM0012408,EVM0002390,EVM0003893,EVM0000266,EVM0016034,EVM0020135,EVM0014019,EVM0003464,EVM0005002,EVM0000597,EVM0007545,EVM…	0
cyan	Biological process	cellular macromolecule biosynthetic process	GO:0034645	6	0	4.30997	66	2465	69	11107	EVM0001762,EVM0005564,EVM0026787,EVM0005202,EVM0025733,EVM0001407,EVM0022626,EVM0014963,EVM0021493,EVM0004520,EVM0024073,EVM0004007,EVM0020705,EVM0016453,EVM0011962,EVM0025395,EVM0004337,EVM0001102,EVM0006630,EVM0000014,EVM0004858,EVM0027735,EVM0015193,EVM0016202,EVM0012401,EVM0012408,EVM0002390,EVM0003893,EVM0000266,EVM0016034,EVM0020135,EVM0014019,EVM0003464,EVM0005002,EVM0000597,EVM0007545,EVM…	0
cyan	Biological process	regulation of macromolecule metabolic process	GO:0060255	5	0	4.60915	66	2305	69	11107	EVM0001762,EVM0005564,EVM0026787,EVM0005202,EVM0025733,EVM0001407,EVM0022626,EVM0014963,EVM0021493,EVM0004520,EVM0024073,EVM0004007,EVM0020705,EVM0016453,EVM0011962,EVM0025395,EVM0004337,EVM0001102,EVM0006630,EVM0000014,EVM0004858,EVM0027735,EVM0015193,EVM0016202,EVM0012401,EVM0012408,EVM0002390,EVM0003893,EVM0000266,EVM0016034,EVM0020135,EVM0014019,EVM0003464,EVM0005002,EVM0000597,EVM0007545,EVM…	0
cyan	Biological process	biosynthetic process	GO:0009058	3	0	2.81956	66	3768	69	11107	EVM0001762,EVM0005564,EVM0026787,EVM0005202,EVM0025733,EVM0001407,EVM0022626,EVM0014963,EVM0021493,EVM0004520,EVM0024073,EVM0004007,EVM0020705,EVM0016453,EVM0011962,EVM0025395,EVM0004337,EVM0001102,EVM0006630,EVM0000014,EVM0004858,EVM0027735,EVM0015193,EVM0016202,EVM0012401,EVM0012408,EVM0002390,EVM0003893,EVM0000266,EVM0016034,EVM0020135,EVM0014019,EVM0003464,EVM0005002,EVM0000597,EVM0007545,EVM…	0
cyan	Biological process	macromolecule biosynthetic process	GO:0009059	5	0	4.15978	66	2554	69	11107	EVM0001762,EVM0005564,EVM0026787,EVM0005202,EVM0025733,EVM0001407,EVM0022626,EVM0014963,EVM0021493,EVM0004520,EVM0024073,EVM0004007,EVM0020705,EVM0016453,EVM0011962,EVM0025395,EVM0004337,EVM0001102,EVM0006630,EVM0000014,EVM0004858,EVM0027735,EVM0015193,EVM0016202,EVM0012401,EVM0012408,EVM0002390,EVM0003893,EVM0000266,EVM0016034,EVM0020135,EVM0014019,EVM0003464,EVM0005002,EVM0000597,EVM0007545,EVM…	0
cyan	Biological process	regulation of nucleic acid-templated transcription	GO:1903506	9	0	6.57025	66	1617	69	11107	EVM0001762,EVM0005564,EVM0026787,EVM0005202,EVM0025733,EVM0001407,EVM0022626,EVM0014963,EVM0021493,EVM0004520,EVM0024073,EVM0004007,EVM0020705,EVM0016453,EVM0011962,EVM0025395,EVM0004337,EVM0001102,EVM0006630,EVM0000014,EVM0004858,EVM0027735,EVM0015193,EVM0016202,EVM0012401,EVM0012408,EVM0002390,EVM0003893,EVM0000266,EVM0016034,EVM0020135,EVM0014019,EVM0003464,EVM0005002,EVM0000597,EVM0007545,EVM…	0
cyan	Biological process	regulation of nitrogen compound metabolic process	GO:0051171	5	0	4.9254	66	2157	69	11107	EVM0001762,EVM0005564,EVM0026787,EVM0005202,EVM0025733,EVM0001407,EVM0022626,EVM0014963,EVM0021493,EVM0004520,EVM0024073,EVM0004007,EVM0020705,EVM0016453,EVM0011962,EVM0025395,EVM0004337,EVM0001102,EVM0006630,EVM0000014,EVM0004858,EVM0027735,EVM0015193,EVM0016202,EVM0012401,EVM0012408,EVM0002390,EVM0003893,EVM0000266,EVM0016034,EVM0020135,EVM0014019,EVM0003464,EVM0005002,EVM0000597,EVM0007545,EVM…	0
cyan	Biological process	gene expression	GO:0010467	5	1.11e-16	3.7634	66	2823	69	11107	EVM0001762,EVM0005564,EVM0026787,EVM0005202,EVM0025733,EVM0001407,EVM0022626,EVM0014963,EVM0021493,EVM0004520,EVM0024073,EVM0004007,EVM0020705,EVM0016453,EVM0011962,EVM0025395,EVM0004337,EVM0001102,EVM0006630,EVM0000014,EVM0004858,EVM0027735,EVM0015193,EVM0016202,EVM0012401,EVM0012408,EVM0002390,EVM0003893,EVM0000266,EVM0016034,EVM0020135,EVM0014019,EVM0003464,EVM0005002,EVM0000597,EVM0007545,EVM…	2.4e-15
cyan	Biological process	regulation of gene expression	GO:0010468	6	1.11e-16	5.38474	66	1973	69	11107	EVM0001762,EVM0005564,EVM0026787,EVM0005202,EVM0025733,EVM0001407,EVM0022626,EVM0014963,EVM0021493,EVM0004520,EVM0024073,EVM0004007,EVM0020705,EVM0016453,EVM0011962,EVM0025395,EVM0004337,EVM0001102,EVM0006630,EVM0000014,EVM0004858,EVM0027735,EVM0015193,EVM0016202,EVM0012401,EVM0012408,EVM0002390,EVM0003893,EVM0000266,EVM0016034,EVM0020135,EVM0014019,EVM0003464,EVM0005002,EVM0000597,EVM0007545,EVM…	2.4e-15
cyan	Biological process	regulation of macromolecule biosynthetic process	GO:0010556	6	1.11e-16	5.91871	66	1795	69	11107	EVM0001762,EVM0005564,EVM0026787,EVM0005202,EVM0025733,EVM0001407,EVM0022626,EVM0014963,EVM0021493,EVM0004520,EVM0024073,EVM0004007,EVM0020705,EVM0016453,EVM0011962,EVM0025395,EVM0004337,EVM0001102,EVM0006630,EVM0000014,EVM0004858,EVM0027735,EVM0015193,EVM0016202,EVM0012401,EVM0012408,EVM0002390,EVM0003893,EVM0000266,EVM0016034,EVM0020135,EVM0014019,EVM0003464,EVM0005002,EVM0000597,EVM0007545,EVM…	2.4e-15
cyan	Biological process	biological regulation	GO:0065007	2	1.11e-16	2.1903	67	4924	69	11107	EVM0001762,EVM0005564,EVM0026787,EVM0005202,EVM0025733,EVM0001407,EVM0022626,EVM0014963,EVM0021493,EVM0004520,EVM0024073,EVM0004007,EVM0020705,EVM0016453,EVM0011962,EVM0025395,EVM0004337,EVM0001102,EVM0006630,EVM0000014,EVM0004858,EVM0027735,EVM0015193,EVM0016202,EVM0012401,EVM0012408,EVM0002390,EVM0003893,EVM0000266,EVM0016034,EVM0020135,EVM0014019,EVM0003464,EVM0005002,EVM0000597,EVM0007545,EVM…	2.4e-15
cyan	Biological process	regulation of biological process	GO:0050789	3	1.11e-16	2.45171	67	4399	69	11107	EVM0001762,EVM0005564,EVM0026787,EVM0005202,EVM0025733,EVM0001407,EVM0022626,EVM0014963,EVM0021493,EVM0004520,EVM0024073,EVM0004007,EVM0020705,EVM0016453,EVM0011962,EVM0025395,EVM0004337,EVM0001102,EVM0006630,EVM0000014,EVM0004858,EVM0027735,EVM0015193,EVM0016202,EVM0012401,EVM0012408,EVM0002390,EVM0003893,EVM0000266,EVM0016034,EVM0020135,EVM0014019,EVM0003464,EVM0005002,EVM0000597,EVM0007545,EVM…	2.4e-15
cyan	Biological process	RNA metabolic process	GO:0016070	7	1.11e-16	3.66981	66	2895	69	11107	EVM0001762,EVM0005564,EVM0026787,EVM0005202,EVM0025733,EVM0001407,EVM0022626,EVM0014963,EVM0021493,EVM0004520,EVM0024073,EVM0004007,EVM0020705,EVM0016453,EVM0011962,EVM0025395,EVM0004337,EVM0001102,EVM0006630,EVM0000014,EVM0004858,EVM0027735,EVM0015193,EVM0016202,EVM0012401,EVM0012408,EVM0002390,EVM0003893,EVM0000266,EVM0016034,EVM0020135,EVM0014019,EVM0003464,EVM0005002,EVM0000597,EVM0007545,EVM…	2.4e-15
cyan	Biological process	aromatic compound biosynthetic process	GO:0019438	5	1.11e-16	4.73655	66	2243	69	11107	EVM0001762,EVM0005564,EVM0026787,EVM0005202,EVM0025733,EVM0001407,EVM0022626,EVM0014963,EVM0021493,EVM0004520,EVM0024073,EVM0004007,EVM0020705,EVM0016453,EVM0011962,EVM0025395,EVM0004337,EVM0001102,EVM0006630,EVM0000014,EVM0004858,EVM0027735,EVM0015193,EVM0016202,EVM0012401,EVM0012408,EVM0002390,EVM0003893,EVM0000266,EVM0016034,EVM0020135,EVM0014019,EVM0003464,EVM0005002,EVM0000597,EVM0007545,EVM…	2.4e-15
cyan	Biological process	nucleobase-containing compound metabolic process	GO:0006139	5	1.11e-16	3.00115	66	3540	69	11107	EVM0001762,EVM0005564,EVM0026787,EVM0005202,EVM0025733,EVM0001407,EVM0022626,EVM0014963,EVM0021493,EVM0004520,EVM0024073,EVM0004007,EVM0020705,EVM0016453,EVM0011962,EVM0025395,EVM0004337,EVM0001102,EVM0006630,EVM0000014,EVM0004858,EVM0027735,EVM0015193,EVM0016202,EVM0012401,EVM0012408,EVM0002390,EVM0003893,EVM0000266,EVM0016034,EVM0020135,EVM0014019,EVM0003464,EVM0005002,EVM0000597,EVM0007545,EVM…	2.4e-15
cyan	Biological process	DNA-templated transcription	GO:0006351	10	2.22e-16	6.36936	66	1668	69	11107	EVM0001762,EVM0005564,EVM0026787,EVM0005202,EVM0025733,EVM0001407,EVM0022626,EVM0014963,EVM0021493,EVM0004520,EVM0024073,EVM0004007,EVM0020705,EVM0016453,EVM0011962,EVM0025395,EVM0004337,EVM0001102,EVM0006630,EVM0000014,EVM0004858,EVM0027735,EVM0015193,EVM0016202,EVM0012401,EVM0012408,EVM0002390,EVM0003893,EVM0000266,EVM0016034,EVM0020135,EVM0014019,EVM0003464,EVM0005002,EVM0000597,EVM0007545,EVM…	3.79e-15
cyan	Biological process	regulation of cellular biosynthetic process	GO:0031326	6	2.22e-16	5.68741	66	1868	69	11107	EVM0001762,EVM0005564,EVM0026787,EVM0005202,EVM0025733,EVM0001407,EVM0022626,EVM0014963,EVM0021493,EVM0004520,EVM0024073,EVM0004007,EVM0020705,EVM0016453,EVM0011962,EVM0025395,EVM0004337,EVM0001102,EVM0006630,EVM0000014,EVM0004858,EVM0027735,EVM0015193,EVM0016202,EVM0012401,EVM0012408,EVM0002390,EVM0003893,EVM0000266,EVM0016034,EVM0020135,EVM0014019,EVM0003464,EVM0005002,EVM0000597,EVM0007545,EVM…	3.79e-15
cyan	Biological process	nucleobase-containing compound biosynthetic process	GO:0034654	6	3.33e-16	5.41769	66	1961	69	11107	EVM0001762,EVM0005564,EVM0026787,EVM0005202,EVM0025733,EVM0001407,EVM0022626,EVM0014963,EVM0021493,EVM0004520,EVM0024073,EVM0004007,EVM0020705,EVM0016453,EVM0011962,EVM0025395,EVM0004337,EVM0001102,EVM0006630,EVM0000014,EVM0004858,EVM0027735,EVM0015193,EVM0016202,EVM0012401,EVM0012408,EVM0002390,EVM0003893,EVM0000266,EVM0016034,EVM0020135,EVM0014019,EVM0003464,EVM0005002,EVM0000597,EVM0007545,EVM…	5.4e-15
cyan	Biological process	regulation of nucleobase-containing compound metabolic process	GO:0019219	6	4.44e-16	5.79917	66	1832	69	11107	EVM0001762,EVM0005564,EVM0026787,EVM0005202,EVM0025733,EVM0001407,EVM0022626,EVM0014963,EVM0021493,EVM0004520,EVM0024073,EVM0004007,EVM0020705,EVM0016453,EVM0011962,EVM0025395,EVM0004337,EVM0001102,EVM0006630,EVM0000014,EVM0004858,EVM0027735,EVM0015193,EVM0016202,EVM0012401,EVM0012408,EVM0002390,EVM0003893,EVM0000266,EVM0016034,EVM0020135,EVM0014019,EVM0003464,EVM0005002,EVM0000597,EVM0007545,EVM…	7.02e-15
cyan	Biological process	nitrogen compound metabolic process	GO:0006807	3	6.66e-16	1.79422	67	6011	69	11107	EVM0001762,EVM0005564,EVM0026787,EVM0005202,EVM0025733,EVM0001407,EVM0022626,EVM0014963,EVM0021493,EVM0004520,EVM0024073,EVM0004007,EVM0020705,EVM0016453,EVM0011962,EVM0025395,EVM0004337,EVM0001102,EVM0006630,EVM0000014,EVM0004858,EVM0027735,EVM0015193,EVM0016202,EVM0012401,EVM0012408,EVM0002390,EVM0003893,EVM0000266,EVM0016034,EVM0020135,EVM0014019,EVM0003464,EVM0005002,EVM0000597,EVM0007545,EVM…	1.03e-14
cyan	Biological process	cellular metabolic process	GO:0044237	3	1.07e-12	1.5478	68	7072	69	11107	EVM0001762,EVM0005564,EVM0026787,EVM0005202,EVM0025733,EVM0001407,EVM0022626,EVM0014963,EVM0021493,EVM0004520,EVM0024073,EVM0004007,EVM0020705,EVM0016453,EVM0011962,EVM0025395,EVM0004337,EVM0001102,EVM0006630,EVM0000014,EVM0004858,EVM0027735,EVM0015193,EVM0016202,EVM0012401,EVM0012408,EVM0002390,EVM0003893,EVM0000266,EVM0016034,EVM0020135,EVM0014019,EVM0003464,EVM0005002,EVM0000597,EVM0007545,EVM…	1.61e-11
cyan	Biological process	primary metabolic process	GO:0044238	3	6.53e-12	1.59713	66	6652	69	11107	EVM0001762,EVM0005564,EVM0026787,EVM0005202,EVM0025733,EVM0001407,EVM0022626,EVM0014963,EVM0021493,EVM0004520,EVM0024073,EVM0004007,EVM0020705,EVM0016453,EVM0011962,EVM0025395,EVM0004337,EVM0001102,EVM0006630,EVM0000014,EVM0004858,EVM0027735,EVM0015193,EVM0016202,EVM0012401,EVM0012408,EVM0002390,EVM0003893,EVM0000266,EVM0016034,EVM0020135,EVM0014019,EVM0003464,EVM0005002,EVM0000597,EVM0007545,EVM…	9.61e-11
cyan	Biological process	positive regulation of DNA-templated transcription	GO:0045893	11	7.42e-12	7.12925	19	429	69	11107	EVM0020705,EVM0025395,EVM0004337,EVM0006630,EVM0015193,EVM0005002,EVM0000597,EVM0007545,EVM0015577,EVM0001282,EVM0009579,EVM0016256,EVM0025354,EVM0010818,EVM0001024,EVM0020736,EVM0024380,EVM0023959,EVM0017601,	1.07e-10
cyan	Biological process	positive regulation of RNA biosynthetic process	GO:1902680	9	1.78e-11	6.78148	19	451	69	11107	EVM0020705,EVM0025395,EVM0004337,EVM0006630,EVM0015193,EVM0005002,EVM0000597,EVM0007545,EVM0015577,EVM0001282,EVM0009579,EVM0016256,EVM0025354,EVM0010818,EVM0001024,EVM0020736,EVM0024380,EVM0023959,EVM0017601,	2.5e-10
cyan	Biological process	positive regulation of nucleic acid-templated transcription	GO:1903508	10	1.78e-11	6.78148	19	451	69	11107	EVM0020705,EVM0025395,EVM0004337,EVM0006630,EVM0015193,EVM0005002,EVM0000597,EVM0007545,EVM0015577,EVM0001282,EVM0009579,EVM0016256,EVM0025354,EVM0010818,EVM0001024,EVM0020736,EVM0024380,EVM0023959,EVM0017601,	2.5e-10
cyan	Biological process	organic substance metabolic process	GO:0071704	3	2.17e-11	1.52482	67	7073	69	11107	EVM0001762,EVM0005564,EVM0026787,EVM0005202,EVM0025733,EVM0001407,EVM0022626,EVM0014963,EVM0021493,EVM0004520,EVM0024073,EVM0004007,EVM0020705,EVM0016453,EVM0011962,EVM0025395,EVM0004337,EVM0001102,EVM0006630,EVM0000014,EVM0004858,EVM0027735,EVM0015193,EVM0016202,EVM0012401,EVM0012408,EVM0002390,EVM0003893,EVM0000266,EVM0016034,EVM0020135,EVM0014019,EVM0003464,EVM0005002,EVM0000597,EVM0007545,EVM…	2.93e-10
cyan	Biological process	positive regulation of cellular biosynthetic process	GO:0031328	7	3.3e-11	6.08586	20	529	69	11107	EVM0020705,EVM0025395,EVM0004337,EVM0006630,EVM0015193,EVM0005002,EVM0000597,EVM0007545,EVM0015577,EVM0001282,EVM0009579,EVM0016256,EVM0025354,EVM0010818,EVM0001024,EVM0020736,EVM0007880,EVM0024380,EVM0023959,EVM0017601,	4.37e-10
cyan	Biological process	positive regulation of biosynthetic process	GO:0009891	6	7.34e-11	5.82174	20	553	69	11107	EVM0020705,EVM0025395,EVM0004337,EVM0006630,EVM0015193,EVM0005002,EVM0000597,EVM0007545,EVM0015577,EVM0001282,EVM0009579,EVM0016256,EVM0025354,EVM0010818,EVM0001024,EVM0020736,EVM0007880,EVM0024380,EVM0023959,EVM0017601,	9.51e-10
cyan	Biological process	positive regulation of macromolecule biosynthetic process	GO:0010557	7	1.48e-10	5.99696	19	510	69	11107	EVM0020705,EVM0025395,EVM0004337,EVM0006630,EVM0015193,EVM0005002,EVM0000597,EVM0007545,EVM0015577,EVM0001282,EVM0009579,EVM0016256,EVM0025354,EVM0010818,EVM0001024,EVM0020736,EVM0024380,EVM0023959,EVM0017601,	1.88e-09
cyan	Biological process	positive regulation of RNA metabolic process	GO:0051254	8	1.99e-10	5.89297	19	519	69	11107	EVM0020705,EVM0025395,EVM0004337,EVM0006630,EVM0015193,EVM0005002,EVM0000597,EVM0007545,EVM0015577,EVM0001282,EVM0009579,EVM0016256,EVM0025354,EVM0010818,EVM0001024,EVM0020736,EVM0024380,EVM0023959,EVM0017601,	2.48e-09
cyan	Biological process	positive regulation of gene expression	GO:0010628	7	3.03e-10	5.74896	19	532	69	11107	EVM0020705,EVM0025395,EVM0004337,EVM0006630,EVM0015193,EVM0005002,EVM0000597,EVM0007545,EVM0015577,EVM0001282,EVM0009579,EVM0016256,EVM0025354,EVM0010818,EVM0001024,EVM0020736,EVM0024380,EVM0023959,EVM0017601,	3.7e-09
cyan	Biological process	metabolic process	GO:0008152	2	4e-10	1.41568	68	7732	69	11107	EVM0001762,EVM0005564,EVM0026787,EVM0005202,EVM0025733,EVM0001407,EVM0022626,EVM0014963,EVM0021493,EVM0004520,EVM0024073,EVM0004007,EVM0020705,EVM0016453,EVM0011962,EVM0025395,EVM0004337,EVM0001102,EVM0006630,EVM0000014,EVM0004858,EVM0027735,EVM0015193,EVM0016202,EVM0012401,EVM0012408,EVM0002390,EVM0003893,EVM0000266,EVM0016034,EVM0020135,EVM0014019,EVM0003464,EVM0005002,EVM0000597,EVM0007545,EVM…	4.8e-09
cyan	Biological process	positive regulation of nucleobase-containing compound metabolic process	GO:0045935	7	6.78e-10	5.48109	19	558	69	11107	EVM0020705,EVM0025395,EVM0004337,EVM0006630,EVM0015193,EVM0005002,EVM0000597,EVM0007545,EVM0015577,EVM0001282,EVM0009579,EVM0016256,EVM0025354,EVM0010818,EVM0001024,EVM0020736,EVM0024380,EVM0023959,EVM0017601,	7.99e-09
cyan	Biological process	positive regulation of metabolic process	GO:0009893	5	7.21e-10	4.33021	23	855	69	11107	EVM0001407,EVM0020705,EVM0025395,EVM0004337,EVM0006630,EVM0004858,EVM0015193,EVM0000266,EVM0005002,EVM0000597,EVM0007545,EVM0015577,EVM0001282,EVM0009579,EVM0016256,EVM0025354,EVM0010818,EVM0001024,EVM0020736,EVM0007880,EVM0024380,EVM0023959,EVM0017601,	8.34e-09
cyan	Biological process	response to gibberellin	GO:0009739	6	1.23e-08	11.5806	10	139	69	11107	EVM0001407,EVM0004520,EVM0004337,EVM0004858,EVM0012408,EVM0000266,EVM0017077,EVM0027253,EVM0023959,EVM0022473,	1.4e-07
cyan	Biological process	rhythmic process	GO:0048511	2	1.32e-08	11.4979	10	140	69	11107	EVM0005564,EVM0026787,EVM0004337,EVM0004858,EVM0000266,EVM0014019,EVM0001282,EVM0001024,EVM0027253,EVM0027884,	1.48e-07
cyan	Biological process	circadian rhythm	GO:0007623	3	1.32e-08	11.4979	10	140	69	11107	EVM0005564,EVM0026787,EVM0004337,EVM0004858,EVM0000266,EVM0014019,EVM0001282,EVM0001024,EVM0027253,EVM0027884,	1.48e-07
cyan	Biological process	positive regulation of cellular metabolic process	GO:0031325	6	1.67e-08	4.26413	20	755	69	11107	EVM0020705,EVM0025395,EVM0004337,EVM0006630,EVM0015193,EVM0005002,EVM0000597,EVM0007545,EVM0015577,EVM0001282,EVM0009579,EVM0016256,EVM0025354,EVM0010818,EVM0001024,EVM0020736,EVM0007880,EVM0024380,EVM0023959,EVM0017601,	1.8e-07
cyan	Biological process	positive regulation of nitrogen compound metabolic process	GO:0051173	6	4.17e-08	4.26562	19	717	69	11107	EVM0020705,EVM0025395,EVM0004337,EVM0006630,EVM0015193,EVM0005002,EVM0000597,EVM0007545,EVM0015577,EVM0001282,EVM0009579,EVM0016256,EVM0025354,EVM0010818,EVM0001024,EVM0020736,EVM0024380,EVM0023959,EVM0017601,	4.43e-07
cyan	Biological process	positive regulation of biological process	GO:0048518	4	6.58e-08	3.0527	26	1371	69	11107	EVM0001407,EVM0004007,EVM0020705,EVM0011962,EVM0025395,EVM0004337,EVM0006630,EVM0004858,EVM0015193,EVM0000266,EVM0005002,EVM0000597,EVM0007545,EVM0015577,EVM0001282,EVM0009579,EVM0016256,EVM0025354,EVM0010818,EVM0001024,EVM0020736,EVM0007880,EVM0024380,EVM0023959,EVM0017601,EVM0022473,	6.88e-07
cyan	Biological process	positive regulation of macromolecule metabolic process	GO:0010604	6	1.43e-07	3.94639	19	775	69	11107	EVM0020705,EVM0025395,EVM0004337,EVM0006630,EVM0015193,EVM0005002,EVM0000597,EVM0007545,EVM0015577,EVM0001282,EVM0009579,EVM0016256,EVM0025354,EVM0010818,EVM0001024,EVM0020736,EVM0024380,EVM0023959,EVM0017601,	1.47e-06
cyan	Biological process	response to abscisic acid	GO:0009737	6	2.52e-07	4.55847	16	565	69	11107	EVM0004520,EVM0016453,EVM0011962,EVM0004337,EVM0004858,EVM0015193,EVM0012408,EVM0000266,EVM0016034,EVM0009579,EVM0005937,EVM0016256,EVM0020736,EVM0027253,EVM0023959,EVM0022473,	2.55e-06
cyan	Biological process	response to acid chemical	GO:0001101	4	2.76e-07	3.29123	22	1076	69	11107	EVM0001407,EVM0004520,EVM0016453,EVM0011962,EVM0025395,EVM0004337,EVM0006630,EVM0004858,EVM0027735,EVM0015193,EVM0012408,EVM0000266,EVM0016034,EVM0017077,EVM0009579,EVM0005937,EVM0016256,EVM0020736,EVM0027253,EVM0023959,EVM0017601,EVM0022473,	2.76e-06
cyan	Biological process	positive regulation of cellular process	GO:0048522	5	2.95e-07	3.27904	22	1080	69	11107	EVM0004007,EVM0020705,EVM0011962,EVM0025395,EVM0004337,EVM0006630,EVM0015193,EVM0005002,EVM0000597,EVM0007545,EVM0015577,EVM0001282,EVM0009579,EVM0016256,EVM0025354,EVM0010818,EVM0001024,EVM0020736,EVM0007880,EVM0024380,EVM0023959,EVM0017601,	2.9e-06
cyan	Biological process	regulation of photomorphogenesis	GO:0010099	7	3.1e-07	33.5356	5	24	69	11107	EVM0004858,EVM0000266,EVM0009026,EVM0024812,EVM0022473,	3e-06
cyan	Biological process	response to lipid	GO:0033993	5	3.16e-07	3.5692	20	902	69	11107	EVM0001407,EVM0004520,EVM0016453,EVM0011962,EVM0004337,EVM0006630,EVM0004858,EVM0027735,EVM0015193,EVM0012408,EVM0000266,EVM0016034,EVM0017077,EVM0009579,EVM0005937,EVM0016256,EVM0020736,EVM0027253,EVM0023959,EVM0022473,	3.01e-06
cyan	Biological process	response to alcohol	GO:0097305	5	3.51e-07	4.44825	16	579	69	11107	EVM0004520,EVM0016453,EVM0011962,EVM0004337,EVM0004858,EVM0015193,EVM0012408,EVM0000266,EVM0016034,EVM0009579,EVM0005937,EVM0016256,EVM0020736,EVM0027253,EVM0023959,EVM0022473,	3.3e-06
cyan	Biological process	response to abiotic stimulus	GO:0009628	3	5.59e-07	2.45258	30	1969	69	11107	EVM0005202,EVM0001407,EVM0021493,EVM0004520,EVM0016453,EVM0011962,EVM0025395,EVM0004337,EVM0006630,EVM0000014,EVM0004858,EVM0015193,EVM0012408,EVM0000266,EVM0016034,EVM0023078,EVM0001282,EVM0009579,EVM0005937,EVM0016656,EVM0025354,EVM0001024,EVM0009026,EVM0024380,EVM0027253,EVM0027884,EVM0024812,EVM0023959,EVM0017601,EVM0022473,	5.17e-06
cyan	Biological process	developmental process	GO:0032502	2	1.05e-06	2.0128	38	3039	69	11107	EVM0026787,EVM0005202,EVM0025733,EVM0001407,EVM0022626,EVM0021493,EVM0004520,EVM0024073,EVM0004007,EVM0025395,EVM0004337,EVM0004858,EVM0027735,EVM0012401,EVM0003893,EVM0000266,EVM0014019,EVM0003464,EVM0000597,EVM0007545,EVM0017077,EVM0015577,EVM0023078,EVM0014907,EVM0005937,EVM0021282,EVM0025354,EVM0020736,EVM0016488,EVM0009026,EVM0008850,EVM0024380,EVM0027253,EVM0024812,EVM0023959,EVM0016635,EVM…	9.6e-06
cyan	Biological process	meristem structural organization	GO:0009933	4	1.3e-06	16.9443	6	57	69	11107	EVM0022626,EVM0004007,EVM0007545,EVM0021282,EVM0008850,EVM0016635,	1.17e-05
cyan	Biological process	negative regulation of DNA-templated transcription	GO:0045892	11	1.69e-06	6.84983	10	235	69	11107	EVM0025733,EVM0014963,EVM0021493,EVM0016453,EVM0004337,EVM0001102,EVM0016034,EVM0002416,EVM0025354,EVM0017601,	1.5e-05
cyan	Biological process	meristem initiation	GO:0010014	3	1.93e-06	23.6722	5	34	69	11107	EVM0022626,EVM0004007,EVM0021282,EVM0008850,EVM0016635,	1.69e-05
cyan	Biological process	regulation of response to red or far red light	GO:2000030	5	2.24e-06	22.9959	5	35	69	11107	EVM0004858,EVM0000266,EVM0009026,EVM0024812,EVM0022473,	1.94e-05
cyan	Biological process	negative regulation of RNA biosynthetic process	GO:1902679	9	3.28e-06	6.36249	10	253	69	11107	EVM0025733,EVM0014963,EVM0021493,EVM0016453,EVM0004337,EVM0001102,EVM0016034,EVM0002416,EVM0025354,EVM0017601,	2.76e-05
cyan	Biological process	negative regulation of nucleic acid-templated transcription	GO:1903507	10	3.28e-06	6.36249	10	253	69	11107	EVM0025733,EVM0014963,EVM0021493,EVM0016453,EVM0004337,EVM0001102,EVM0016034,EVM0002416,EVM0025354,EVM0017601,	2.76e-05
cyan	Biological process	phloem or xylem histogenesis	GO:0010087	5	3.92e-06	10.6302	7	106	69	11107	EVM0022626,EVM0004007,EVM0000597,EVM0015577,EVM0020736,EVM0008850,EVM0016635,	3.22e-05
cyan	Biological process	regulation of post-embryonic development	GO:0048580	6	4.28e-06	4.95295	12	390	69	11107	EVM0005202,EVM0021493,EVM0004858,EVM0027735,EVM0000266,EVM0003464,EVM0007545,EVM0009026,EVM0027253,EVM0024812,EVM0023959,EVM0022473,	3.46e-05
cyan	Biological process	response to oxygen-containing compound	GO:1901700	4	4.63e-06	2.53099	25	1590	69	11107	EVM0001407,EVM0004520,EVM0016453,EVM0011962,EVM0025395,EVM0004337,EVM0006630,EVM0004858,EVM0027735,EVM0015193,EVM0016202,EVM0012408,EVM0000266,EVM0016034,EVM0002416,EVM0017077,EVM0009579,EVM0005937,EVM0016256,EVM0020736,EVM0012567,EVM0027253,EVM0023959,EVM0017601,EVM0022473,	3.71e-05
cyan	Biological process	regulation of developmental process	GO:0050793	4	4.64e-06	3.45955	17	791	69	11107	EVM0005202,EVM0025733,EVM0021493,EVM0024073,EVM0004007,EVM0004858,EVM0027735,EVM0000266,EVM0003464,EVM0007545,EVM0021282,EVM0009026,EVM0024380,EVM0027253,EVM0024812,EVM0023959,EVM0022473,	3.66e-05
cyan	Biological process	response to organic substance	GO:0010033	4	4.71e-06	2.33171	28	1933	69	11107	EVM0001407,EVM0004520,EVM0004007,EVM0016453,EVM0011962,EVM0004337,EVM0006630,EVM0004858,EVM0027735,EVM0015193,EVM0016202,EVM0012408,EVM0000266,EVM0016034,EVM0002416,EVM0017077,EVM0009579,EVM0005937,EVM0016256,EVM0025354,EVM0020736,EVM0012567,EVM0024380,EVM0027253,EVM0027884,EVM0023959,EVM0017601,EVM0022473,	3.68e-05
cyan	Biological process	anatomical structure arrangement	GO:0048532	3	5.21e-06	13.4143	6	72	69	11107	EVM0022626,EVM0004007,EVM0007545,EVM0021282,EVM0008850,EVM0016635,	3.98e-05
cyan	Biological process	response to hormone	GO:0009725	5	7.58e-06	2.53664	24	1523	69	11107	EVM0001407,EVM0004520,EVM0004007,EVM0016453,EVM0011962,EVM0004337,EVM0006630,EVM0004858,EVM0027735,EVM0015193,EVM0012408,EVM0000266,EVM0016034,EVM0017077,EVM0009579,EVM0005937,EVM0016256,EVM0020736,EVM0024380,EVM0027253,EVM0027884,EVM0023959,EVM0017601,EVM0022473,	5.64e-05
cyan	Biological process	red or far-red light signaling pathway	GO:0010017	9	8.05e-06	17.8857	5	45	69	11107	EVM0001407,EVM0004858,EVM0000266,EVM0001282,EVM0001024,	5.93e-05
cyan	Biological process	negative regulation of RNA metabolic process	GO:0051253	8	8.08e-06	5.74896	10	280	69	11107	EVM0025733,EVM0014963,EVM0021493,EVM0016453,EVM0004337,EVM0001102,EVM0016034,EVM0002416,EVM0025354,EVM0017601,	5.88e-05
cyan	Biological process	cellular response to red or far red light	GO:0071489	8	1e-05	17.1246	5	47	69	11107	EVM0001407,EVM0004858,EVM0000266,EVM0001282,EVM0001024,	7.21e-05
cyan	Biological process	flavonoid metabolic process	GO:0009812	4	1.11e-05	9.08707	7	124	69	11107	EVM0001407,EVM0025395,EVM0006630,EVM0004858,EVM0000266,EVM0025354,EVM0024380,	7.89e-05
cyan	Biological process	cell differentiation	GO:0030154	4	1.2e-05	3.39333	16	759	69	11107	EVM0026787,EVM0021493,EVM0004520,EVM0024073,EVM0004007,EVM0027735,EVM0012401,EVM0003893,EVM0014019,EVM0017077,EVM0014907,EVM0020736,EVM0016488,EVM0008850,EVM0024380,EVM0017601,	8.47e-05
cyan	Biological process	regulation of circadian rhythm	GO:0042752	4	1.23e-05	16.4256	5	49	69	11107	EVM0004337,EVM0004858,EVM0000266,EVM0001282,EVM0001024,	8.59e-05
cyan	Biological process	response to endogenous stimulus	GO:0009719	3	1.28e-05	2.4607	24	1570	69	11107	EVM0001407,EVM0004520,EVM0004007,EVM0016453,EVM0011962,EVM0004337,EVM0006630,EVM0004858,EVM0027735,EVM0015193,EVM0012408,EVM0000266,EVM0016034,EVM0017077,EVM0009579,EVM0005937,EVM0016256,EVM0020736,EVM0024380,EVM0027253,EVM0027884,EVM0023959,EVM0017601,EVM0022473,	8.85e-05
cyan	Biological process	xylem development	GO:0010089	6	1.5e-05	15.7815	5	51	69	11107	EVM0004007,EVM0000597,EVM0015577,EVM0020736,EVM0008850,	0.00010256
cyan	Biological process	photomorphogenesis	GO:0009640	7	1.67e-05	10.9753	6	88	69	11107	EVM0001407,EVM0004858,EVM0000266,EVM0009026,EVM0024812,EVM0022473,	0.000112942
cyan	Biological process	anatomical structure development	GO:0048856	3	2.3e-05	1.90964	34	2866	69	11107	EVM0026787,EVM0005202,EVM0025733,EVM0001407,EVM0022626,EVM0021493,EVM0024073,EVM0004007,EVM0025395,EVM0004337,EVM0004858,EVM0027735,EVM0012401,EVM0003893,EVM0000266,EVM0014019,EVM0003464,EVM0000597,EVM0007545,EVM0017077,EVM0015577,EVM0023078,EVM0014907,EVM0005937,EVM0021282,EVM0025354,EVM0020736,EVM0009026,EVM0008850,EVM0027253,EVM0024812,EVM0023959,EVM0016635,EVM0022473,	0.000152299
cyan	Biological process	negative regulation of nucleobase-containing compound metabolic process	GO:0045934	7	2.31e-05	5.09402	10	316	69	11107	EVM0025733,EVM0014963,EVM0021493,EVM0016453,EVM0004337,EVM0001102,EVM0016034,EVM0002416,EVM0025354,EVM0017601,	0.000151348
cyan	Biological process	response to ethylene	GO:0009723	6	3.02e-05	6.4712	8	199	69	11107	EVM0016453,EVM0004337,EVM0012408,EVM0016034,EVM0024380,EVM0027253,EVM0027884,EVM0017601,	0.000196011
cyan	Biological process	post-embryonic development	GO:0009791	3	3.12e-05	2.40255	23	1541	69	11107	EVM0005202,EVM0001407,EVM0022626,EVM0021493,EVM0004007,EVM0004337,EVM0004858,EVM0027735,EVM0012401,EVM0000266,EVM0003464,EVM0007545,EVM0017077,EVM0023078,EVM0005937,EVM0021282,EVM0025354,EVM0009026,EVM0027253,EVM0024812,EVM0023959,EVM0016635,EVM0022473,	0.000200119
cyan	Biological process	reproductive process	GO:0022414	2	3.46e-05	2.38706	23	1551	69	11107	EVM0005202,EVM0022626,EVM0021493,EVM0004007,EVM0020705,EVM0004337,EVM0000014,EVM0027735,EVM0012401,EVM0003893,EVM0003464,EVM0007545,EVM0017077,EVM0023078,EVM0014907,EVM0005937,EVM0021282,EVM0025354,EVM0027253,EVM0024812,EVM0023959,EVM0016635,EVM0022473,	0.000220042
cyan	Biological process	reproduction	GO:0000003	2	3.8e-05	2.37329	23	1560	69	11107	EVM0005202,EVM0022626,EVM0021493,EVM0004007,EVM0020705,EVM0004337,EVM0000014,EVM0027735,EVM0012401,EVM0003893,EVM0003464,EVM0007545,EVM0017077,EVM0023078,EVM0014907,EVM0005937,EVM0021282,EVM0025354,EVM0027253,EVM0024812,EVM0023959,EVM0016635,EVM0022473,	0.000239244
cyan	Biological process	negative regulation of post-embryonic development	GO:0048581	7	4.1e-05	9.37695	6	103	69	11107	EVM0005202,EVM0021493,EVM0009026,EVM0024812,EVM0023959,EVM0022473,	0.000255712
cyan	Biological process	negative regulation of cellular macromolecule biosynthetic process	GO:2000113	8	4.89e-05	4.66583	10	345	69	11107	EVM0025733,EVM0014963,EVM0021493,EVM0016453,EVM0004337,EVM0001102,EVM0016034,EVM0002416,EVM0025354,EVM0017601,	0.000301519
cyan	Biological process	response to red or far red light	GO:0009639	6	5.08e-05	6.01761	8	214	69	11107	EVM0001407,EVM0004858,EVM0000266,EVM0001282,EVM0001024,EVM0009026,EVM0024812,EVM0022473,	0.00031036
cyan	Biological process	developmental process involved in reproduction	GO:0003006	3	5.11e-05	2.47466	21	1366	69	11107	EVM0005202,EVM0022626,EVM0021493,EVM0004007,EVM0004337,EVM0027735,EVM0012401,EVM0003893,EVM0003464,EVM0007545,EVM0017077,EVM0023078,EVM0014907,EVM0005937,EVM0021282,EVM0025354,EVM0027253,EVM0024812,EVM0023959,EVM0016635,EVM0022473,	0.000309606
cyan	Biological process	reproductive system development	GO:0061458	5	5.18e-05	2.6503	19	1154	69	11107	EVM0005202,EVM0022626,EVM0021493,EVM0004007,EVM0004337,EVM0027735,EVM0012401,EVM0003464,EVM0007545,EVM0017077,EVM0023078,EVM0005937,EVM0021282,EVM0025354,EVM0027253,EVM0024812,EVM0023959,EVM0016635,EVM0022473,	0.00031098
cyan	Biological process	reproductive structure development	GO:0048608	4	5.18e-05	2.6503	19	1154	69	11107	EVM0005202,EVM0022626,EVM0021493,EVM0004007,EVM0004337,EVM0027735,EVM0012401,EVM0003464,EVM0007545,EVM0017077,EVM0023078,EVM0005937,EVM0021282,EVM0025354,EVM0027253,EVM0024812,EVM0023959,EVM0016635,EVM0022473,	0.00031098
cyan	Biological process	negative regulation of developmental process	GO:0051093	5	5.31e-05	7.13163	7	158	69	11107	EVM0005202,EVM0021493,EVM0009026,EVM0024380,EVM0024812,EVM0023959,EVM0022473,	0.00031307
cyan	Biological process	multicellular organism development	GO:0007275	4	5.35e-05	1.9751	30	2445	69	11107	EVM0026787,EVM0005202,EVM0001407,EVM0022626,EVM0021493,EVM0024073,EVM0004007,EVM0025395,EVM0004337,EVM0004858,EVM0027735,EVM0012401,EVM0003893,EVM0000266,EVM0014019,EVM0003464,EVM0007545,EVM0017077,EVM0023078,EVM0014907,EVM0005937,EVM0021282,EVM0025354,EVM0009026,EVM0008850,EVM0027253,EVM0024812,EVM0023959,EVM0016635,EVM0022473,	0.000312534
cyan	Biological process	regulation of multicellular organismal development	GO:2000026	5	5.51e-05	3.56495	13	587	69	11107	EVM0005202,EVM0021493,EVM0024073,EVM0004858,EVM0027735,EVM0000266,EVM0003464,EVM0007545,EVM0009026,EVM0027253,EVM0024812,EVM0023959,EVM0022473,	0.000318802
cyan	Biological process	negative regulation of macromolecule biosynthetic process	GO:0010558	7	7.84e-05	4.41016	10	365	69	11107	EVM0025733,EVM0014963,EVM0021493,EVM0016453,EVM0004337,EVM0001102,EVM0016034,EVM0002416,EVM0025354,EVM0017601,	0.000449494
cyan	Biological process	cellular response to light stimulus	GO:0071482	7	9.21e-05	8.11619	6	119	69	11107	EVM0001407,EVM0004858,EVM0000266,EVM0001282,EVM0001024,EVM0009026,	0.000523789
cyan	Biological process	gibberellin mediated signaling pathway	GO:0010476	7	0.000111637	10.4527	5	77	69	11107	EVM0001407,EVM0004858,EVM0000266,EVM0017077,EVM0022473,	0.000623626
cyan	Biological process	gibberellic acid mediated signaling pathway	GO:0009740	8	0.000111637	10.4527	5	77	69	11107	EVM0001407,EVM0004858,EVM0000266,EVM0017077,EVM0022473,	0.000623626
cyan	Biological process	negative regulation of cellular biosynthetic process	GO:0031327	7	0.000111877	4.22496	10	381	69	11107	EVM0025733,EVM0014963,EVM0021493,EVM0016453,EVM0004337,EVM0001102,EVM0016034,EVM0002416,EVM0025354,EVM0017601,	0.000614374
cyan	Biological process	response to radiation	GO:0009314	4	0.00011796	2.95179	15	818	69	11107	EVM0005202,EVM0001407,EVM0025395,EVM0004337,EVM0000014,EVM0004858,EVM0000266,EVM0023078,EVM0001282,EVM0025354,EVM0001024,EVM0009026,EVM0024380,EVM0024812,EVM0022473,	0.000642338
cyan	Biological process	cellular response to gibberellin stimulus	GO:0071370	7	0.000118713	10.3187	5	78	69	11107	EVM0001407,EVM0004858,EVM0000266,EVM0017077,EVM0022473,	0.000641049
cyan	Biological process	negative regulation of biosynthetic process	GO:0009890	6	0.000129965	4.14874	10	388	69	11107	EVM0025733,EVM0014963,EVM0021493,EVM0016453,EVM0004337,EVM0001102,EVM0016034,EVM0002416,EVM0025354,EVM0017601,	0.000696011
cyan	Biological process	cellular developmental process	GO:0048869	3	0.000146972	2.76049	16	933	69	11107	EVM0026787,EVM0021493,EVM0004520,EVM0024073,EVM0004007,EVM0027735,EVM0012401,EVM0003893,EVM0014019,EVM0017077,EVM0014907,EVM0020736,EVM0016488,EVM0008850,EVM0024380,EVM0017601,	0.000780637
cyan	Biological process	photoperiodism, flowering	GO:0048573	7	0.00016322	7.31686	6	132	69	11107	EVM0005202,EVM0004337,EVM0023078,EVM0025354,EVM0024812,EVM0022473,	0.00085989
cyan	Biological process	cellular response to radiation	GO:0071478	6	0.000170103	7.26185	6	133	69	11107	EVM0001407,EVM0004858,EVM0000266,EVM0001282,EVM0001024,EVM0009026,	0.000888925
cyan	Biological process	shoot system development	GO:0048367	5	0.000185438	2.834	15	852	69	11107	EVM0005202,EVM0022626,EVM0021493,EVM0024073,EVM0004007,EVM0025395,EVM0027735,EVM0012401,EVM0003464,EVM0007545,EVM0017077,EVM0005937,EVM0021282,EVM0027253,EVM0016635,	0.000961311
cyan	Biological process	response to light stimulus	GO:0009416	5	0.000209025	2.94973	14	764	69	11107	EVM0005202,EVM0001407,EVM0025395,EVM0004337,EVM0004858,EVM0000266,EVM0023078,EVM0001282,EVM0025354,EVM0001024,EVM0009026,EVM0024380,EVM0024812,EVM0022473,	0.00107499
cyan	Biological process	regulation of multicellular organismal process	GO:0051239	4	0.000212018	3.11866	13	671	69	11107	EVM0005202,EVM0021493,EVM0024073,EVM0004858,EVM0027735,EVM0000266,EVM0003464,EVM0007545,EVM0009026,EVM0027253,EVM0024812,EVM0023959,EVM0022473,	0.00108179
cyan	Biological process	photoperiodism	GO:0009648	6	0.000216376	6.94839	6	139	69	11107	EVM0005202,EVM0004337,EVM0023078,EVM0025354,EVM0024812,EVM0022473,	0.0010954
cyan	Biological process	response to osmotic stress	GO:0006970	4	0.00024222	3.27955	12	589	69	11107	EVM0004520,EVM0011962,EVM0004337,EVM0006630,EVM0015193,EVM0012408,EVM0009579,EVM0024380,EVM0027253,EVM0027884,EVM0023959,EVM0017601,	0.00121673
cyan	Biological process	response to water deprivation	GO:0009414	6	0.000248875	4.23608	9	342	69	11107	EVM0016453,EVM0011962,EVM0025395,EVM0015193,EVM0016034,EVM0009579,EVM0005937,EVM0023959,EVM0017601,	0.00124055
cyan	Biological process	response to water	GO:0009415	5	0.000271287	4.18711	9	346	69	11107	EVM0016453,EVM0011962,EVM0025395,EVM0015193,EVM0016034,EVM0009579,EVM0005937,EVM0023959,EVM0017601,	0.00134194
cyan	Biological process	cellular response to organic substance	GO:0071310	5	0.000277872	2.61211	16	986	69	11107	EVM0001407,EVM0016453,EVM0011962,EVM0004858,EVM0016202,EVM0000266,EVM0016034,EVM0017077,EVM0009579,EVM0016256,EVM0025354,EVM0020736,EVM0027253,EVM0023959,EVM0017601,EVM0022473,	0.0013641
cyan	Biological process	response to salt stress	GO:0009651	5	0.00029313	3.45162	11	513	69	11107	EVM0004520,EVM0011962,EVM0004337,EVM0006630,EVM0012408,EVM0009579,EVM0024380,EVM0027253,EVM0027884,EVM0023959,EVM0017601,	0.00142818
cyan	Biological process	vegetative to reproductive phase transition of meristem	GO:0010228	4	0.0003214	5.34027	7	211	69	11107	EVM0005202,EVM0004337,EVM0023078,EVM0005937,EVM0025354,EVM0024812,EVM0022473,	0.00155423
cyan	Biological process	negative regulation of multicellular organismal process	GO:0051241	5	0.00032659	6.43884	6	150	69	11107	EVM0005202,EVM0021493,EVM0009026,EVM0024812,EVM0023959,EVM0022473,	0.00156763
cyan	Biological process	response to jasmonic acid	GO:0009753	7	0.000340323	5.29013	7	213	69	11107	EVM0004520,EVM0004337,EVM0006630,EVM0027735,EVM0012408,EVM0017077,EVM0027253,	0.00162154
cyan	Biological process	negative regulation of biological process	GO:0048519	4	0.000343496	2.37693	18	1219	69	11107	EVM0005202,EVM0025733,EVM0014963,EVM0021493,EVM0004520,EVM0016453,EVM0004337,EVM0001102,EVM0000014,EVM0016034,EVM0002416,EVM0025354,EVM0009026,EVM0024380,EVM0024812,EVM0023959,EVM0017601,EVM0022473,	0.00162471
cyan	Biological process	response to fatty acid	GO:0070542	6	0.000350115	5.26541	7	214	69	11107	EVM0004520,EVM0004337,EVM0006630,EVM0027735,EVM0012408,EVM0017077,EVM0027253,	0.00164402
cyan	Biological process	multicellular organismal process	GO:0032501	2	0.000374244	1.78394	30	2707	69	11107	EVM0026787,EVM0005202,EVM0001407,EVM0022626,EVM0021493,EVM0024073,EVM0004007,EVM0025395,EVM0004337,EVM0004858,EVM0027735,EVM0012401,EVM0003893,EVM0000266,EVM0014019,EVM0003464,EVM0007545,EVM0017077,EVM0023078,EVM0014907,EVM0005937,EVM0021282,EVM0025354,EVM0009026,EVM0008850,EVM0027253,EVM0024812,EVM0023959,EVM0016635,EVM0022473,	0.00174468
cyan	Biological process	regulation of flower development	GO:0009909	7	0.000446055	6.07438	6	159	69	11107	EVM0005202,EVM0021493,EVM0027735,EVM0003464,EVM0007545,EVM0027253,	0.00204996
cyan	Biological process	negative regulation of nitrogen compound metabolic process	GO:0051172	6	0.000654854	3.38886	10	475	69	11107	EVM0025733,EVM0014963,EVM0021493,EVM0016453,EVM0004337,EVM0001102,EVM0016034,EVM0002416,EVM0025354,EVM0017601,	0.00292652
cyan	Biological process	system development	GO:0048731	4	0.000687653	1.9641	23	1885	69	11107	EVM0026787,EVM0005202,EVM0022626,EVM0021493,EVM0024073,EVM0004007,EVM0025395,EVM0004337,EVM0027735,EVM0012401,EVM0014019,EVM0003464,EVM0007545,EVM0017077,EVM0023078,EVM0005937,EVM0021282,EVM0025354,EVM0027253,EVM0024812,EVM0023959,EVM0016635,EVM0022473,	0.00305205
cyan	Biological process	response to chemical	GO:0042221	3	0.000708987	1.69616	31	2942	69	11107	EVM0001407,EVM0004520,EVM0004007,EVM0016453,EVM0011962,EVM0025395,EVM0004337,EVM0006630,EVM0004858,EVM0027735,EVM0015193,EVM0016202,EVM0012408,EVM0000266,EVM0016034,EVM0002416,EVM0017077,EVM0009579,EVM0005937,EVM0019008,EVM0016256,EVM0025354,EVM0008851,EVM0020736,EVM0012567,EVM0024380,EVM0027253,EVM0027884,EVM0023959,EVM0017601,EVM0022473,	0.00312533
cyan	Biological process	regulation of reproductive process	GO:2000241	4	0.000711144	4.08815	8	315	69	11107	EVM0005202,EVM0021493,EVM0000014,EVM0027735,EVM0003464,EVM0007545,EVM0027253,EVM0022473,	0.00311366
cyan	Biological process	negative regulation of cellular metabolic process	GO:0031324	6	0.00089994	3.25194	10	495	69	11107	EVM0025733,EVM0014963,EVM0021493,EVM0016453,EVM0004337,EVM0001102,EVM0016034,EVM0002416,EVM0025354,EVM0017601,	0.00391383
cyan	Biological process	negative regulation of gene expression	GO:0010629	7	0.00101714	3.20022	10	503	69	11107	EVM0025733,EVM0014963,EVM0021493,EVM0016453,EVM0004337,EVM0001102,EVM0016034,EVM0002416,EVM0025354,EVM0017601,	0.00439404
cyan	Biological process	regulation of shoot system development	GO:0048831	5	0.00103945	4.38442	7	257	69	11107	EVM0005202,EVM0021493,EVM0024073,EVM0027735,EVM0003464,EVM0007545,EVM0027253,	0.00446069
cyan	Biological process	response to salicylic acid	GO:0009751	6	0.00110472	5.11019	6	189	69	11107	EVM0004520,EVM0004337,EVM0027735,EVM0012408,EVM0027253,EVM0017601,	0.0047096
cyan	Biological process	response to inorganic substance	GO:0010035	4	0.00160457	2.40512	14	937	69	11107	EVM0016453,EVM0011962,EVM0025395,EVM0004337,EVM0015193,EVM0012408,EVM0016034,EVM0009579,EVM0005937,EVM0019008,EVM0008851,EVM0027884,EVM0023959,EVM0017601,	0.00679582
cyan	Biological process	cellular response to endogenous stimulus	GO:0071495	4	0.00163558	2.51215	13	833	69	11107	EVM0001407,EVM0016453,EVM0011962,EVM0004858,EVM0000266,EVM0016034,EVM0017077,EVM0009579,EVM0016256,EVM0020736,EVM0027253,EVM0017601,EVM0022473,	0.00688216
cyan	Biological process	cellular response to abiotic stimulus	GO:0071214	5	0.0016753	4.71135	6	205	69	11107	EVM0001407,EVM0004858,EVM0000266,EVM0001282,EVM0001024,EVM0009026,	0.00700385
cyan	Biological process	cellular response to environmental stimulus	GO:0104004	4	0.0016753	4.71135	6	205	69	11107	EVM0001407,EVM0004858,EVM0000266,EVM0001282,EVM0001024,EVM0009026,	0.00700385
cyan	Biological process	tissue development	GO:0009888	4	0.00180832	2.61387	12	739	69	11107	EVM0026787,EVM0025733,EVM0022626,EVM0004007,EVM0014019,EVM0000597,EVM0007545,EVM0015577,EVM0021282,EVM0020736,EVM0008850,EVM0016635,	0.00746366
cyan	Biological process	cellular process	GO:0009987	2	0.00193067	1.11535	68	9814	69	11107	EVM0001762,EVM0005564,EVM0026787,EVM0005202,EVM0025733,EVM0001407,EVM0022626,EVM0014963,EVM0021493,EVM0004520,EVM0024073,EVM0004007,EVM0020705,EVM0016453,EVM0011962,EVM0025395,EVM0004337,EVM0001102,EVM0006630,EVM0000014,EVM0004858,EVM0027735,EVM0015193,EVM0016202,EVM0012401,EVM0012408,EVM0002390,EVM0003893,EVM0000266,EVM0016034,EVM0020135,EVM0014019,EVM0003464,EVM0005002,EVM0000597,EVM0007545,EVM…	0.00786839
cyan	Biological process	reproductive shoot system development	GO:0090567	6	0.0025634	3.04998	9	475	69	11107	EVM0005202,EVM0021493,EVM0027735,EVM0012401,EVM0003464,EVM0007545,EVM0017077,EVM0005937,EVM0027253,	0.0102536
cyan	Biological process	cellular response to hormone stimulus	GO:0032870	6	0.00283914	2.47648	12	780	69	11107	EVM0001407,EVM0016453,EVM0011962,EVM0004858,EVM0000266,EVM0016034,EVM0017077,EVM0009579,EVM0016256,EVM0020736,EVM0027253,EVM0022473,	0.0112869
cyan	Biological process	negative regulation of metabolic process	GO:0009892	5	0.00284144	2.61548	11	677	69	11107	EVM0025733,EVM0014963,EVM0021493,EVM0004520,EVM0016453,EVM0004337,EVM0001102,EVM0016034,EVM0002416,EVM0025354,EVM0017601,	0.0112272
cyan	Biological process	meristem development	GO:0048507	5	0.0029169	3.65843	7	308	69	11107	EVM0025733,EVM0022626,EVM0004007,EVM0007545,EVM0021282,EVM0008850,EVM0016635,	0.0113864
cyan	Biological process	negative regulation of response to stimulus	GO:0048585	5	0.00313369	3.61153	7	312	69	11107	EVM0005202,EVM0016453,EVM0016034,EVM0009026,EVM0024812,EVM0017601,EVM0022473,	0.0121595
cyan	Biological process	response to organic cyclic compound	GO:0014070	5	0.00392145	3.11808	8	413	69	11107	EVM0004520,EVM0004337,EVM0027735,EVM0012408,EVM0025354,EVM0020736,EVM0027253,EVM0017601,	0.0149476
cyan	Biological process	pigment metabolic process	GO:0042440	3	0.00404132	4.73444	5	170	69	11107	EVM0001407,EVM0006630,EVM0004858,EVM0000266,EVM0024380,	0.0153145
cyan	Biological process	regulation of transcription by RNA polymerase II	GO:0006357	11	0.00412702	3.43536	7	328	69	11107	EVM0004520,EVM0020705,EVM0027735,EVM0017077,EVM0016488,EVM0024380,EVM0017601,	0.0155483
cyan	Biological process	cellular response to alcohol	GO:0097306	6	0.00523181	3.74351	6	258	69	11107	EVM0011962,EVM0004858,EVM0000266,EVM0009579,EVM0016256,EVM0022473,	0.019484
cyan	Biological process	cellular response to abscisic acid stimulus	GO:0071215	7	0.00523181	3.74351	6	258	69	11107	EVM0011962,EVM0004858,EVM0000266,EVM0009579,EVM0016256,EVM0022473,	0.019484
cyan	Biological process	negative regulation of macromolecule metabolic process	GO:0010605	6	0.00562256	2.53099	10	636	69	11107	EVM0025733,EVM0014963,EVM0021493,EVM0016453,EVM0004337,EVM0001102,EVM0016034,EVM0002416,EVM0025354,EVM0017601,	0.0205843
cyan	Biological process	flower development	GO:0009908	7	0.00742753	2.7995	8	460	69	11107	EVM0005202,EVM0021493,EVM0027735,EVM0003464,EVM0007545,EVM0017077,EVM0005937,EVM0027253,	0.0261578
cyan	Biological process	hormone-mediated signaling pathway	GO:0009755	6	0.00787198	2.40975	10	668	69	11107	EVM0001407,EVM0016453,EVM0011962,EVM0004858,EVM0000266,EVM0016034,EVM0017077,EVM0009579,EVM0027253,EVM0022473,	0.0275732
cyan	Biological process	negative regulation of cellular process	GO:0048523	5	0.0084111	2.16068	12	894	69	11107	EVM0025733,EVM0014963,EVM0021493,EVM0016453,EVM0004337,EVM0001102,EVM0000014,EVM0016034,EVM0002416,EVM0025354,EVM0024380,EVM0017601,	0.028838
cyan	Biological process	cellular response to acid chemical	GO:0071229	5	0.00868689	2.98885	7	377	69	11107	EVM0001407,EVM0011962,EVM0004858,EVM0000266,EVM0017077,EVM0016256,EVM0022473,	0.0296268
cyan	Biological process	transcription by RNA polymerase II	GO:0006366	11	0.0088078	2.98094	7	378	69	11107	EVM0004520,EVM0020705,EVM0027735,EVM0017077,EVM0016488,EVM0024380,EVM0017601,	0.029882
cyan	Biological process	cellular response to lipid	GO:0071396	6	0.00893805	2.71109	8	475	69	11107	EVM0001407,EVM0011962,EVM0004858,EVM0000266,EVM0017077,EVM0009579,EVM0016256,EVM0022473,	0.0300096
cyan	Biological process	cellular response to oxygen-containing compound	GO:1901701	5	0.0100732	2.32281	10	693	69	11107	EVM0001407,EVM0011962,EVM0004858,EVM0016202,EVM0000266,EVM0017077,EVM0009579,EVM0016256,EVM0023959,EVM0022473,	0.0333033
cyan	Biological process	regulation of response to stimulus	GO:0048583	4	0.0105434	2.09734	12	921	69	11107	EVM0005202,EVM0020705,EVM0016453,EVM0011962,EVM0004858,EVM0000266,EVM0016034,EVM0009579,EVM0009026,EVM0024812,EVM0017601,EVM0022473,	0.0343321
cyan	Biological process	response to antibiotic	GO:0046677	4	0.0121946	3.12565	6	309	69	11107	EVM0004520,EVM0004337,EVM0027735,EVM0012408,EVM0027253,EVM0017601,	0.038547
cyan	Biological process	abscisic acid-activated signaling pathway	GO:0009738	7	0.0128311	3.57713	5	225	69	11107	EVM0011962,EVM0004858,EVM0000266,EVM0009579,EVM0022473,	0.0397825
cyan	Biological process	response to auxin	GO:0009733	6	0.0180105	2.86595	6	337	69	11107	EVM0004007,EVM0004337,EVM0012408,EVM0020736,EVM0024380,EVM0027253,	0.0542827
cyan	Biological process	cellular response to chemical stimulus	GO:0070887	4	0.0211769	1.70115	16	1514	69	11107	EVM0001407,EVM0016453,EVM0011962,EVM0004858,EVM0016202,EVM0000266,EVM0016034,EVM0017077,EVM0009579,EVM0016256,EVM0025354,EVM0020736,EVM0027253,EVM0023959,EVM0017601,EVM0022473,	0.0612617
cyan	Biological process	response to organonitrogen compound	GO:0010243	5	0.026016	2.98094	5	270	69	11107	EVM0004337,EVM0002416,EVM0012567,EVM0023959,EVM0017601,	0.0693761
cyan	Biological process	cell division	GO:0051301	3	0.0263806	2.96994	5	271	69	11107	EVM0026787,EVM0022626,EVM0014019,EVM0016635,EVM0017601,	0.0700601
cyan	Biological process	response to stimulus	GO:0050896	2	0.0322415	1.24784	41	5289	69	11107	EVM0005202,EVM0001407,EVM0021493,EVM0004520,EVM0004007,EVM0020705,EVM0016453,EVM0011962,EVM0025395,EVM0004337,EVM0006630,EVM0000014,EVM0004858,EVM0027735,EVM0015193,EVM0016202,EVM0012408,EVM0000266,EVM0016034,EVM0002416,EVM0017077,EVM0023078,EVM0001282,EVM0009579,EVM0005937,EVM0019008,EVM0016256,EVM0016656,EVM0025354,EVM0008851,EVM0001024,EVM0020736,EVM0012567,EVM0009026,EVM0024380,EVM0027253,EVM…	0.0839057
cyan	Biological process	response to nitrogen compound	GO:1901698	4	0.0398781	2.37888	6	406	69	11107	EVM0004337,EVM0002416,EVM0025354,EVM0012567,EVM0023959,EVM0017601,	0.0997723
darkred	Molecular function	DNA-binding transcription factor activity	GO:0003700	3	1.11e-16	7.68878	46	1146	49	9386	EVM0005764,EVM0008834,EVM0009725,EVM0017791,EVM0002929,EVM0019539,EVM0021657,EVM0012221,EVM0020401,EVM0016148,EVM0021257,EVM0011454,EVM0027191,EVM0016947,EVM0018804,EVM0023791,EVM0023471,EVM0023075,EVM0009680,EVM0000887,EVM0000400,EVM0000008,EVM0018351,EVM0012294,EVM0016452,EVM0015243,EVM0017981,EVM0015522,EVM0010995,EVM0009824,EVM0005267,EVM0004979,EVM0005508,EVM0001826,EVM0000935,EVM0012042,EVM…	5.66e-15
darkred	Molecular function	transcription regulator activity	GO:0140110	2	7.77e-16	7.2165	46	1221	49	9386	EVM0005764,EVM0008834,EVM0009725,EVM0017791,EVM0002929,EVM0019539,EVM0021657,EVM0012221,EVM0020401,EVM0016148,EVM0021257,EVM0011454,EVM0027191,EVM0016947,EVM0018804,EVM0023791,EVM0023471,EVM0023075,EVM0009680,EVM0000887,EVM0000400,EVM0000008,EVM0018351,EVM0012294,EVM0016452,EVM0015243,EVM0017981,EVM0015522,EVM0010995,EVM0009824,EVM0005267,EVM0004979,EVM0005508,EVM0001826,EVM0000935,EVM0012042,EVM…	1.98e-14
darkred	Molecular function	transcription regulatory region nucleic acid binding	GO:0001067	5	9.78e-10	7.95761	14	337	49	9386	EVM0008834,EVM0009725,EVM0021257,EVM0027191,EVM0016947,EVM0018804,EVM0023471,EVM0016452,EVM0015243,EVM0004979,EVM0012042,EVM0009980,EVM0010890,EVM0017923,	1.66e-08
darkred	Molecular function	transcription cis-regulatory region binding	GO:0000976	8	9.78e-10	7.95761	14	337	49	9386	EVM0008834,EVM0009725,EVM0021257,EVM0027191,EVM0016947,EVM0018804,EVM0023471,EVM0016452,EVM0015243,EVM0004979,EVM0012042,EVM0009980,EVM0010890,EVM0017923,	1.66e-08
darkred	Molecular function	sequence-specific double-stranded DNA binding	GO:1990837	7	3.07e-09	7.28727	14	368	49	9386	EVM0008834,EVM0009725,EVM0021257,EVM0027191,EVM0016947,EVM0018804,EVM0023471,EVM0016452,EVM0015243,EVM0004979,EVM0012042,EVM0009980,EVM0010890,EVM0017923,	3.13e-08
darkred	Molecular function	DNA binding	GO:0003677	5	3.4e-09	4.16847	21	965	49	9386	EVM0008834,EVM0009725,EVM0019539,EVM0012221,EVM0021257,EVM0011454,EVM0027191,EVM0016947,EVM0018804,EVM0023471,EVM0012294,EVM0016452,EVM0015243,EVM0017981,EVM0004979,EVM0005508,EVM0012042,EVM0023458,EVM0009980,EVM0010890,EVM0017923,	2.89e-08
darkred	Molecular function	double-stranded DNA binding	GO:0003690	6	5.1e-09	6.32878	15	454	49	9386	EVM0008834,EVM0009725,EVM0021257,EVM0027191,EVM0016947,EVM0018804,EVM0023471,EVM0012294,EVM0016452,EVM0015243,EVM0004979,EVM0012042,EVM0009980,EVM0010890,EVM0017923,	3.71e-08
darkred	Molecular function	sequence-specific DNA binding	GO:0043565	6	5.23e-08	4.90371	16	625	49	9386	EVM0008834,EVM0009725,EVM0012221,EVM0021257,EVM0027191,EVM0016947,EVM0018804,EVM0023471,EVM0016452,EVM0015243,EVM0017981,EVM0004979,EVM0012042,EVM0009980,EVM0010890,EVM0017923,	3.33e-07
darkred	Molecular function	nucleic acid binding	GO:0003676	4	0.000982467	1.92837	21	2086	49	9386	EVM0008834,EVM0009725,EVM0019539,EVM0012221,EVM0021257,EVM0011454,EVM0027191,EVM0016947,EVM0018804,EVM0023471,EVM0012294,EVM0016452,EVM0015243,EVM0017981,EVM0004979,EVM0005508,EVM0012042,EVM0023458,EVM0009980,EVM0010890,EVM0017923,	0.00556731
darkred	Molecular function	DNA-binding transcription factor activity, RNA polymerase II-specific	GO:0000981	4	0.00108739	6.34275	5	151	49	9386	EVM0008834,EVM0009725,EVM0016947,EVM0023471,EVM0016452,	0.00554571
darkred	Molecular function	heterocyclic compound binding	GO:1901363	3	0.00672391	1.66359	21	2418	49	9386	EVM0008834,EVM0009725,EVM0019539,EVM0012221,EVM0021257,EVM0011454,EVM0027191,EVM0016947,EVM0018804,EVM0023471,EVM0012294,EVM0016452,EVM0015243,EVM0017981,EVM0004979,EVM0005508,EVM0012042,EVM0023458,EVM0009980,EVM0010890,EVM0017923,	0.0244942
darkred	Molecular function	organic cyclic compound binding	GO:0097159	3	0.00700124	1.65811	21	2426	49	9386	EVM0008834,EVM0009725,EVM0019539,EVM0012221,EVM0021257,EVM0011454,EVM0027191,EVM0016947,EVM0018804,EVM0023471,EVM0012294,EVM0016452,EVM0015243,EVM0017981,EVM0004979,EVM0005508,EVM0012042,EVM0023458,EVM0009980,EVM0010890,EVM0017923,	0.0238042
darkred	Cellular component	nucleus	GO:0005634	6	1.03e-13	2.95446	32	3448	35	11142	EVM0005764,EVM0008834,EVM0009725,EVM0017791,EVM0002929,EVM0008390,EVM0012221,EVM0020401,EVM0016148,EVM0016226,EVM0027191,EVM0016947,EVM0023471,EVM0000887,EVM0000400,EVM0000008,EVM0012294,EVM0016452,EVM0015243,EVM0017981,EVM0010995,EVM0009824,EVM0005508,EVM0017292,EVM0012042,EVM0023458,EVM0017816,EVM0009980,EVM0005994,EVM0006841,EVM0023525,EVM0010890,	5.76e-12
darkred	Cellular component	intracellular membrane-bounded organelle	GO:0043231	5	5.48e-06	1.4127	35	7887	35	11142	EVM0005764,EVM0008834,EVM0009725,EVM0017791,EVM0002929,EVM0008390,EVM0012221,EVM0020401,EVM0016148,EVM0016226,EVM0027191,EVM0016947,EVM0018804,EVM0023471,EVM0000887,EVM0000400,EVM0000008,EVM0012294,EVM0016452,EVM0015243,EVM0017981,EVM0010995,EVM0009824,EVM0005508,EVM0017292,EVM0012042,EVM0023458,EVM0017778,EVM0017816,EVM0009980,EVM0005994,EVM0006841,EVM0023525,EVM0010890,EVM0022312,	0.000153379
darkred	Cellular component	membrane-bounded organelle	GO:0043227	4	6.29e-06	1.40717	35	7918	35	11142	EVM0005764,EVM0008834,EVM0009725,EVM0017791,EVM0002929,EVM0008390,EVM0012221,EVM0020401,EVM0016148,EVM0016226,EVM0027191,EVM0016947,EVM0018804,EVM0023471,EVM0000887,EVM0000400,EVM0000008,EVM0012294,EVM0016452,EVM0015243,EVM0017981,EVM0010995,EVM0009824,EVM0005508,EVM0017292,EVM0012042,EVM0023458,EVM0017778,EVM0017816,EVM0009980,EVM0005994,EVM0006841,EVM0023525,EVM0010890,EVM0022312,	0.000117336
darkred	Cellular component	intracellular organelle	GO:0043229	4	2e-05	1.36144	35	8184	35	11142	EVM0005764,EVM0008834,EVM0009725,EVM0017791,EVM0002929,EVM0008390,EVM0012221,EVM0020401,EVM0016148,EVM0016226,EVM0027191,EVM0016947,EVM0018804,EVM0023471,EVM0000887,EVM0000400,EVM0000008,EVM0012294,EVM0016452,EVM0015243,EVM0017981,EVM0010995,EVM0009824,EVM0005508,EVM0017292,EVM0012042,EVM0023458,EVM0017778,EVM0017816,EVM0009980,EVM0005994,EVM0006841,EVM0023525,EVM0010890,EVM0022312,	0.000280422
darkred	Cellular component	organelle	GO:0043226	3	2.23e-05	1.35729	35	8209	35	11142	EVM0005764,EVM0008834,EVM0009725,EVM0017791,EVM0002929,EVM0008390,EVM0012221,EVM0020401,EVM0016148,EVM0016226,EVM0027191,EVM0016947,EVM0018804,EVM0023471,EVM0000887,EVM0000400,EVM0000008,EVM0012294,EVM0016452,EVM0015243,EVM0017981,EVM0010995,EVM0009824,EVM0005508,EVM0017292,EVM0012042,EVM0023458,EVM0017778,EVM0017816,EVM0009980,EVM0005994,EVM0006841,EVM0023525,EVM0010890,EVM0022312,	0.000249666
darkred	Cellular component	obsolete intracellular part	GO:0044424	0	0.00161286	1.20129	35	9275	35	11142	EVM0005764,EVM0008834,EVM0009725,EVM0017791,EVM0002929,EVM0008390,EVM0012221,EVM0020401,EVM0016148,EVM0016226,EVM0027191,EVM0016947,EVM0018804,EVM0023471,EVM0000887,EVM0000400,EVM0000008,EVM0012294,EVM0016452,EVM0015243,EVM0017981,EVM0010995,EVM0009824,EVM0005508,EVM0017292,EVM0012042,EVM0023458,EVM0017778,EVM0017816,EVM0009980,EVM0005994,EVM0006841,EVM0023525,EVM0010890,EVM0022312,	0.0150534
darkred	Cellular component	intracellular anatomical structure	GO:0005622	3	0.00184752	1.19665	35	9311	35	11142	EVM0005764,EVM0008834,EVM0009725,EVM0017791,EVM0002929,EVM0008390,EVM0012221,EVM0020401,EVM0016148,EVM0016226,EVM0027191,EVM0016947,EVM0018804,EVM0023471,EVM0000887,EVM0000400,EVM0000008,EVM0012294,EVM0016452,EVM0015243,EVM0017981,EVM0010995,EVM0009824,EVM0005508,EVM0017292,EVM0012042,EVM0023458,EVM0017778,EVM0017816,EVM0009980,EVM0005994,EVM0006841,EVM0023525,EVM0010890,EVM0022312,	0.0147802
darkred	Biological process	RNA biosynthetic process	GO:0032774	8	0	6.37395	48	1707	49	11107	EVM0005764,EVM0008834,EVM0009725,EVM0017791,EVM0002929,EVM0019539,EVM0021657,EVM0012221,EVM0020401,EVM0016148,EVM0021257,EVM0011454,EVM0016226,EVM0027191,EVM0016947,EVM0018804,EVM0023791,EVM0023471,EVM0023075,EVM0009680,EVM0000887,EVM0000400,EVM0000008,EVM0018351,EVM0012294,EVM0016452,EVM0015243,EVM0017981,EVM0015522,EVM0010995,EVM0009824,EVM0005267,EVM0004979,EVM0005508,EVM0017292,EVM0001826,EVM…	0
darkred	Biological process	organic substance biosynthetic process	GO:1901576	4	0	2.98664	48	3643	49	11107	EVM0005764,EVM0008834,EVM0009725,EVM0017791,EVM0002929,EVM0019539,EVM0021657,EVM0012221,EVM0020401,EVM0016148,EVM0021257,EVM0011454,EVM0016226,EVM0027191,EVM0016947,EVM0018804,EVM0023791,EVM0023471,EVM0023075,EVM0009680,EVM0000887,EVM0000400,EVM0000008,EVM0018351,EVM0012294,EVM0016452,EVM0015243,EVM0017981,EVM0015522,EVM0010995,EVM0009824,EVM0005267,EVM0004979,EVM0005508,EVM0017292,EVM0001826,EVM…	0
darkred	Biological process	regulation of RNA metabolic process	GO:0051252	7	0	6.28194	48	1732	49	11107	EVM0005764,EVM0008834,EVM0009725,EVM0017791,EVM0002929,EVM0019539,EVM0021657,EVM0012221,EVM0020401,EVM0016148,EVM0021257,EVM0011454,EVM0016226,EVM0027191,EVM0016947,EVM0018804,EVM0023791,EVM0023471,EVM0023075,EVM0009680,EVM0000887,EVM0000400,EVM0000008,EVM0018351,EVM0012294,EVM0016452,EVM0015243,EVM0017981,EVM0015522,EVM0010995,EVM0009824,EVM0005267,EVM0004979,EVM0005508,EVM0017292,EVM0001826,EVM…	0
darkred	Biological process	nucleic acid metabolic process	GO:0090304	6	0	3.41229	49	3255	49	11107	EVM0005764,EVM0008834,EVM0009725,EVM0017791,EVM0002929,EVM0019539,EVM0021657,EVM0012221,EVM0020401,EVM0016148,EVM0021257,EVM0011454,EVM0016226,EVM0027191,EVM0016947,EVM0018804,EVM0023791,EVM0023471,EVM0023075,EVM0009680,EVM0000887,EVM0000400,EVM0000008,EVM0018351,EVM0012294,EVM0016452,EVM0015243,EVM0017981,EVM0015522,EVM0010995,EVM0009824,EVM0005267,EVM0004979,EVM0005508,EVM0017292,EVM0001826,EVM…	0
darkred	Biological process	DNA-templated transcription	GO:0006351	10	0	6.52298	48	1668	49	11107	EVM0005764,EVM0008834,EVM0009725,EVM0017791,EVM0002929,EVM0019539,EVM0021657,EVM0012221,EVM0020401,EVM0016148,EVM0021257,EVM0011454,EVM0016226,EVM0027191,EVM0016947,EVM0018804,EVM0023791,EVM0023471,EVM0023075,EVM0009680,EVM0000887,EVM0000400,EVM0000008,EVM0018351,EVM0012294,EVM0016452,EVM0015243,EVM0017981,EVM0015522,EVM0010995,EVM0009824,EVM0005267,EVM0004979,EVM0005508,EVM0017292,EVM0001826,EVM…	0
darkred	Biological process	cellular biosynthetic process	GO:0044249	4	0	3.07702	48	3536	49	11107	EVM0005764,EVM0008834,EVM0009725,EVM0017791,EVM0002929,EVM0019539,EVM0021657,EVM0012221,EVM0020401,EVM0016148,EVM0021257,EVM0011454,EVM0016226,EVM0027191,EVM0016947,EVM0018804,EVM0023791,EVM0023471,EVM0023075,EVM0009680,EVM0000887,EVM0000400,EVM0000008,EVM0018351,EVM0012294,EVM0016452,EVM0015243,EVM0017981,EVM0015522,EVM0010995,EVM0009824,EVM0005267,EVM0004979,EVM0005508,EVM0017292,EVM0001826,EVM…	0
darkred	Biological process	regulation of primary metabolic process	GO:0080090	5	0	4.94111	48	2202	49	11107	EVM0005764,EVM0008834,EVM0009725,EVM0017791,EVM0002929,EVM0019539,EVM0021657,EVM0012221,EVM0020401,EVM0016148,EVM0021257,EVM0011454,EVM0016226,EVM0027191,EVM0016947,EVM0018804,EVM0023791,EVM0023471,EVM0023075,EVM0009680,EVM0000887,EVM0000400,EVM0000008,EVM0018351,EVM0012294,EVM0016452,EVM0015243,EVM0017981,EVM0015522,EVM0010995,EVM0009824,EVM0005267,EVM0004979,EVM0005508,EVM0017292,EVM0001826,EVM…	0
darkred	Biological process	regulation of gene expression	GO:0010468	6	0	5.51461	48	1973	49	11107	EVM0005764,EVM0008834,EVM0009725,EVM0017791,EVM0002929,EVM0019539,EVM0021657,EVM0012221,EVM0020401,EVM0016148,EVM0021257,EVM0011454,EVM0016226,EVM0027191,EVM0016947,EVM0018804,EVM0023791,EVM0023471,EVM0023075,EVM0009680,EVM0000887,EVM0000400,EVM0000008,EVM0018351,EVM0012294,EVM0016452,EVM0015243,EVM0017981,EVM0015522,EVM0010995,EVM0009824,EVM0005267,EVM0004979,EVM0005508,EVM0017292,EVM0001826,EVM…	0
darkred	Biological process	regulation of RNA biosynthetic process	GO:2001141	8	0	6.72871	48	1617	49	11107	EVM0005764,EVM0008834,EVM0009725,EVM0017791,EVM0002929,EVM0019539,EVM0021657,EVM0012221,EVM0020401,EVM0016148,EVM0021257,EVM0011454,EVM0016226,EVM0027191,EVM0016947,EVM0018804,EVM0023791,EVM0023471,EVM0023075,EVM0009680,EVM0000887,EVM0000400,EVM0000008,EVM0018351,EVM0012294,EVM0016452,EVM0015243,EVM0017981,EVM0015522,EVM0010995,EVM0009824,EVM0005267,EVM0004979,EVM0005508,EVM0017292,EVM0001826,EVM…	0
darkred	Biological process	regulation of cellular macromolecule biosynthetic process	GO:2000112	7	0	6.19256	48	1757	49	11107	EVM0005764,EVM0008834,EVM0009725,EVM0017791,EVM0002929,EVM0019539,EVM0021657,EVM0012221,EVM0020401,EVM0016148,EVM0021257,EVM0011454,EVM0016226,EVM0027191,EVM0016947,EVM0018804,EVM0023791,EVM0023471,EVM0023075,EVM0009680,EVM0000887,EVM0000400,EVM0000008,EVM0018351,EVM0012294,EVM0016452,EVM0015243,EVM0017981,EVM0015522,EVM0010995,EVM0009824,EVM0005267,EVM0004979,EVM0005508,EVM0017292,EVM0001826,EVM…	0
darkred	Biological process	nucleic acid-templated transcription	GO:0097659	9	0	6.42665	48	1693	49	11107	EVM0005764,EVM0008834,EVM0009725,EVM0017791,EVM0002929,EVM0019539,EVM0021657,EVM0012221,EVM0020401,EVM0016148,EVM0021257,EVM0011454,EVM0016226,EVM0027191,EVM0016947,EVM0018804,EVM0023791,EVM0023471,EVM0023075,EVM0009680,EVM0000887,EVM0000400,EVM0000008,EVM0018351,EVM0012294,EVM0016452,EVM0015243,EVM0017981,EVM0015522,EVM0010995,EVM0009824,EVM0005267,EVM0004979,EVM0005508,EVM0017292,EVM0001826,EVM…	0
darkred	Biological process	heterocycle metabolic process	GO:0046483	4	0	2.92829	49	3793	49	11107	EVM0005764,EVM0008834,EVM0009725,EVM0017791,EVM0002929,EVM0019539,EVM0021657,EVM0012221,EVM0020401,EVM0016148,EVM0021257,EVM0011454,EVM0016226,EVM0027191,EVM0016947,EVM0018804,EVM0023791,EVM0023471,EVM0023075,EVM0009680,EVM0000887,EVM0000400,EVM0000008,EVM0018351,EVM0012294,EVM0016452,EVM0015243,EVM0017981,EVM0015522,EVM0010995,EVM0009824,EVM0005267,EVM0004979,EVM0005508,EVM0017292,EVM0001826,EVM…	0
darkred	Biological process	regulation of cellular biosynthetic process	GO:0031326	6	0	5.82459	48	1868	49	11107	EVM0005764,EVM0008834,EVM0009725,EVM0017791,EVM0002929,EVM0019539,EVM0021657,EVM0012221,EVM0020401,EVM0016148,EVM0021257,EVM0011454,EVM0016226,EVM0027191,EVM0016947,EVM0018804,EVM0023791,EVM0023471,EVM0023075,EVM0009680,EVM0000887,EVM0000400,EVM0000008,EVM0018351,EVM0012294,EVM0016452,EVM0015243,EVM0017981,EVM0015522,EVM0010995,EVM0009824,EVM0005267,EVM0004979,EVM0005508,EVM0017292,EVM0001826,EVM…	0
darkred	Biological process	regulation of biological process	GO:0050789	3	0	2.47336	48	4399	49	11107	EVM0005764,EVM0008834,EVM0009725,EVM0017791,EVM0002929,EVM0019539,EVM0021657,EVM0012221,EVM0020401,EVM0016148,EVM0021257,EVM0011454,EVM0016226,EVM0027191,EVM0016947,EVM0018804,EVM0023791,EVM0023471,EVM0023075,EVM0009680,EVM0000887,EVM0000400,EVM0000008,EVM0018351,EVM0012294,EVM0016452,EVM0015243,EVM0017981,EVM0015522,EVM0010995,EVM0009824,EVM0005267,EVM0004979,EVM0005508,EVM0017292,EVM0001826,EVM…	0
darkred	Biological process	regulation of cellular process	GO:0050794	4	0	2.7434	48	3966	49	11107	EVM0005764,EVM0008834,EVM0009725,EVM0017791,EVM0002929,EVM0019539,EVM0021657,EVM0012221,EVM0020401,EVM0016148,EVM0021257,EVM0011454,EVM0016226,EVM0027191,EVM0016947,EVM0018804,EVM0023791,EVM0023471,EVM0023075,EVM0009680,EVM0000887,EVM0000400,EVM0000008,EVM0018351,EVM0012294,EVM0016452,EVM0015243,EVM0017981,EVM0015522,EVM0010995,EVM0009824,EVM0005267,EVM0004979,EVM0005508,EVM0017292,EVM0001826,EVM…	0
darkred	Biological process	regulation of biosynthetic process	GO:0009889	5	0	5.70547	48	1907	49	11107	EVM0005764,EVM0008834,EVM0009725,EVM0017791,EVM0002929,EVM0019539,EVM0021657,EVM0012221,EVM0020401,EVM0016148,EVM0021257,EVM0011454,EVM0016226,EVM0027191,EVM0016947,EVM0018804,EVM0023791,EVM0023471,EVM0023075,EVM0009680,EVM0000887,EVM0000400,EVM0000008,EVM0018351,EVM0012294,EVM0016452,EVM0015243,EVM0017981,EVM0015522,EVM0010995,EVM0009824,EVM0005267,EVM0004979,EVM0005508,EVM0017292,EVM0001826,EVM…	0
darkred	Biological process	RNA metabolic process	GO:0016070	7	0	3.75832	48	2895	49	11107	EVM0005764,EVM0008834,EVM0009725,EVM0017791,EVM0002929,EVM0019539,EVM0021657,EVM0012221,EVM0020401,EVM0016148,EVM0021257,EVM0011454,EVM0016226,EVM0027191,EVM0016947,EVM0018804,EVM0023791,EVM0023471,EVM0023075,EVM0009680,EVM0000887,EVM0000400,EVM0000008,EVM0018351,EVM0012294,EVM0016452,EVM0015243,EVM0017981,EVM0015522,EVM0010995,EVM0009824,EVM0005267,EVM0004979,EVM0005508,EVM0017292,EVM0001826,EVM…	0
darkred	Biological process	heterocycle biosynthetic process	GO:0018130	5	0	5.02555	48	2165	49	11107	EVM0005764,EVM0008834,EVM0009725,EVM0017791,EVM0002929,EVM0019539,EVM0021657,EVM0012221,EVM0020401,EVM0016148,EVM0021257,EVM0011454,EVM0016226,EVM0027191,EVM0016947,EVM0018804,EVM0023791,EVM0023471,EVM0023075,EVM0009680,EVM0000887,EVM0000400,EVM0000008,EVM0018351,EVM0012294,EVM0016452,EVM0015243,EVM0017981,EVM0015522,EVM0010995,EVM0009824,EVM0005267,EVM0004979,EVM0005508,EVM0017292,EVM0001826,EVM…	0
darkred	Biological process	regulation of nucleobase-containing compound metabolic process	GO:0019219	6	0	5.93904	48	1832	49	11107	EVM0005764,EVM0008834,EVM0009725,EVM0017791,EVM0002929,EVM0019539,EVM0021657,EVM0012221,EVM0020401,EVM0016148,EVM0021257,EVM0011454,EVM0016226,EVM0027191,EVM0016947,EVM0018804,EVM0023791,EVM0023471,EVM0023075,EVM0009680,EVM0000887,EVM0000400,EVM0000008,EVM0018351,EVM0012294,EVM0016452,EVM0015243,EVM0017981,EVM0015522,EVM0010995,EVM0009824,EVM0005267,EVM0004979,EVM0005508,EVM0017292,EVM0001826,EVM…	0
darkred	Biological process	regulation of metabolic process	GO:0019222	4	0	4.31759	48	2520	49	11107	EVM0005764,EVM0008834,EVM0009725,EVM0017791,EVM0002929,EVM0019539,EVM0021657,EVM0012221,EVM0020401,EVM0016148,EVM0021257,EVM0011454,EVM0016226,EVM0027191,EVM0016947,EVM0018804,EVM0023791,EVM0023471,EVM0023075,EVM0009680,EVM0000887,EVM0000400,EVM0000008,EVM0018351,EVM0012294,EVM0016452,EVM0015243,EVM0017981,EVM0015522,EVM0010995,EVM0009824,EVM0005267,EVM0004979,EVM0005508,EVM0017292,EVM0001826,EVM…	0
darkred	Biological process	organic cyclic compound metabolic process	GO:1901360	4	0	2.76294	49	4020	49	11107	EVM0005764,EVM0008834,EVM0009725,EVM0017791,EVM0002929,EVM0019539,EVM0021657,EVM0012221,EVM0020401,EVM0016148,EVM0021257,EVM0011454,EVM0016226,EVM0027191,EVM0016947,EVM0018804,EVM0023791,EVM0023471,EVM0023075,EVM0009680,EVM0000887,EVM0000400,EVM0000008,EVM0018351,EVM0012294,EVM0016452,EVM0015243,EVM0017981,EVM0015522,EVM0010995,EVM0009824,EVM0005267,EVM0004979,EVM0005508,EVM0017292,EVM0001826,EVM…	0
darkred	Biological process	organic cyclic compound biosynthetic process	GO:1901362	5	0	4.64971	48	2340	49	11107	EVM0005764,EVM0008834,EVM0009725,EVM0017791,EVM0002929,EVM0019539,EVM0021657,EVM0012221,EVM0020401,EVM0016148,EVM0021257,EVM0011454,EVM0016226,EVM0027191,EVM0016947,EVM0018804,EVM0023791,EVM0023471,EVM0023075,EVM0009680,EVM0000887,EVM0000400,EVM0000008,EVM0018351,EVM0012294,EVM0016452,EVM0015243,EVM0017981,EVM0015522,EVM0010995,EVM0009824,EVM0005267,EVM0004979,EVM0005508,EVM0017292,EVM0001826,EVM…	0
darkred	Biological process	cellular nitrogen compound metabolic process	GO:0034641	4	0	2.71432	49	4092	49	11107	EVM0005764,EVM0008834,EVM0009725,EVM0017791,EVM0002929,EVM0019539,EVM0021657,EVM0012221,EVM0020401,EVM0016148,EVM0021257,EVM0011454,EVM0016226,EVM0027191,EVM0016947,EVM0018804,EVM0023791,EVM0023471,EVM0023075,EVM0009680,EVM0000887,EVM0000400,EVM0000008,EVM0018351,EVM0012294,EVM0016452,EVM0015243,EVM0017981,EVM0015522,EVM0010995,EVM0009824,EVM0005267,EVM0004979,EVM0005508,EVM0017292,EVM0001826,EVM…	0
darkred	Biological process	cellular macromolecule biosynthetic process	GO:0034645	6	0	4.41393	48	2465	49	11107	EVM0005764,EVM0008834,EVM0009725,EVM0017791,EVM0002929,EVM0019539,EVM0021657,EVM0012221,EVM0020401,EVM0016148,EVM0021257,EVM0011454,EVM0016226,EVM0027191,EVM0016947,EVM0018804,EVM0023791,EVM0023471,EVM0023075,EVM0009680,EVM0000887,EVM0000400,EVM0000008,EVM0018351,EVM0012294,EVM0016452,EVM0015243,EVM0017981,EVM0015522,EVM0010995,EVM0009824,EVM0005267,EVM0004979,EVM0005508,EVM0017292,EVM0001826,EVM…	0
darkred	Biological process	nucleobase-containing compound biosynthetic process	GO:0034654	6	0	5.54836	48	1961	49	11107	EVM0005764,EVM0008834,EVM0009725,EVM0017791,EVM0002929,EVM0019539,EVM0021657,EVM0012221,EVM0020401,EVM0016148,EVM0021257,EVM0011454,EVM0016226,EVM0027191,EVM0016947,EVM0018804,EVM0023791,EVM0023471,EVM0023075,EVM0009680,EVM0000887,EVM0000400,EVM0000008,EVM0018351,EVM0012294,EVM0016452,EVM0015243,EVM0017981,EVM0015522,EVM0010995,EVM0009824,EVM0005267,EVM0004979,EVM0005508,EVM0017292,EVM0001826,EVM…	0
darkred	Biological process	regulation of macromolecule metabolic process	GO:0060255	5	0	4.72032	48	2305	49	11107	EVM0005764,EVM0008834,EVM0009725,EVM0017791,EVM0002929,EVM0019539,EVM0021657,EVM0012221,EVM0020401,EVM0016148,EVM0021257,EVM0011454,EVM0016226,EVM0027191,EVM0016947,EVM0018804,EVM0023791,EVM0023471,EVM0023075,EVM0009680,EVM0000887,EVM0000400,EVM0000008,EVM0018351,EVM0012294,EVM0016452,EVM0015243,EVM0017981,EVM0015522,EVM0010995,EVM0009824,EVM0005267,EVM0004979,EVM0005508,EVM0017292,EVM0001826,EVM…	0
darkred	Biological process	biosynthetic process	GO:0009058	3	0	2.88756	48	3768	49	11107	EVM0005764,EVM0008834,EVM0009725,EVM0017791,EVM0002929,EVM0019539,EVM0021657,EVM0012221,EVM0020401,EVM0016148,EVM0021257,EVM0011454,EVM0016226,EVM0027191,EVM0016947,EVM0018804,EVM0023791,EVM0023471,EVM0023075,EVM0009680,EVM0000887,EVM0000400,EVM0000008,EVM0018351,EVM0012294,EVM0016452,EVM0015243,EVM0017981,EVM0015522,EVM0010995,EVM0009824,EVM0005267,EVM0004979,EVM0005508,EVM0017292,EVM0001826,EVM…	0
darkred	Biological process	macromolecule biosynthetic process	GO:0009059	5	0	4.26011	48	2554	49	11107	EVM0005764,EVM0008834,EVM0009725,EVM0017791,EVM0002929,EVM0019539,EVM0021657,EVM0012221,EVM0020401,EVM0016148,EVM0021257,EVM0011454,EVM0016226,EVM0027191,EVM0016947,EVM0018804,EVM0023791,EVM0023471,EVM0023075,EVM0009680,EVM0000887,EVM0000400,EVM0000008,EVM0018351,EVM0012294,EVM0016452,EVM0015243,EVM0017981,EVM0015522,EVM0010995,EVM0009824,EVM0005267,EVM0004979,EVM0005508,EVM0017292,EVM0001826,EVM…	0
darkred	Biological process	regulation of nucleic acid-templated transcription	GO:1903506	9	0	6.72871	48	1617	49	11107	EVM0005764,EVM0008834,EVM0009725,EVM0017791,EVM0002929,EVM0019539,EVM0021657,EVM0012221,EVM0020401,EVM0016148,EVM0021257,EVM0011454,EVM0016226,EVM0027191,EVM0016947,EVM0018804,EVM0023791,EVM0023471,EVM0023075,EVM0009680,EVM0000887,EVM0000400,EVM0000008,EVM0018351,EVM0012294,EVM0016452,EVM0015243,EVM0017981,EVM0015522,EVM0010995,EVM0009824,EVM0005267,EVM0004979,EVM0005508,EVM0017292,EVM0001826,EVM…	0
darkred	Biological process	regulation of nitrogen compound metabolic process	GO:0051171	5	0	5.04419	48	2157	49	11107	EVM0005764,EVM0008834,EVM0009725,EVM0017791,EVM0002929,EVM0019539,EVM0021657,EVM0012221,EVM0020401,EVM0016148,EVM0021257,EVM0011454,EVM0016226,EVM0027191,EVM0016947,EVM0018804,EVM0023791,EVM0023471,EVM0023075,EVM0009680,EVM0000887,EVM0000400,EVM0000008,EVM0018351,EVM0012294,EVM0016452,EVM0015243,EVM0017981,EVM0015522,EVM0010995,EVM0009824,EVM0005267,EVM0004979,EVM0005508,EVM0017292,EVM0001826,EVM…	0
darkred	Biological process	aromatic compound biosynthetic process	GO:0019438	5	0	4.85079	48	2243	49	11107	EVM0005764,EVM0008834,EVM0009725,EVM0017791,EVM0002929,EVM0019539,EVM0021657,EVM0012221,EVM0020401,EVM0016148,EVM0021257,EVM0011454,EVM0016226,EVM0027191,EVM0016947,EVM0018804,EVM0023791,EVM0023471,EVM0023075,EVM0009680,EVM0000887,EVM0000400,EVM0000008,EVM0018351,EVM0012294,EVM0016452,EVM0015243,EVM0017981,EVM0015522,EVM0010995,EVM0009824,EVM0005267,EVM0004979,EVM0005508,EVM0017292,EVM0001826,EVM…	0
darkred	Biological process	nucleobase-containing compound metabolic process	GO:0006139	5	0	3.13757	49	3540	49	11107	EVM0005764,EVM0008834,EVM0009725,EVM0017791,EVM0002929,EVM0019539,EVM0021657,EVM0012221,EVM0020401,EVM0016148,EVM0021257,EVM0011454,EVM0016226,EVM0027191,EVM0016947,EVM0018804,EVM0023791,EVM0023471,EVM0023075,EVM0009680,EVM0000887,EVM0000400,EVM0000008,EVM0018351,EVM0012294,EVM0016452,EVM0015243,EVM0017981,EVM0015522,EVM0010995,EVM0009824,EVM0005267,EVM0004979,EVM0005508,EVM0017292,EVM0001826,EVM…	0
darkred	Biological process	regulation of DNA-templated transcription	GO:0006355	10	1.11e-16	6.85159	48	1588	49	11107	EVM0005764,EVM0008834,EVM0009725,EVM0017791,EVM0002929,EVM0019539,EVM0021657,EVM0012221,EVM0020401,EVM0016148,EVM0021257,EVM0011454,EVM0016226,EVM0027191,EVM0016947,EVM0018804,EVM0023791,EVM0023471,EVM0023075,EVM0009680,EVM0000887,EVM0000400,EVM0000008,EVM0018351,EVM0012294,EVM0016452,EVM0015243,EVM0017981,EVM0015522,EVM0010995,EVM0009824,EVM0005267,EVM0004979,EVM0005508,EVM0017292,EVM0001826,EVM…	2.34e-15
darkred	Biological process	cellular macromolecule metabolic process	GO:0044260	5	1.11e-16	2.4875	48	4374	49	11107	EVM0005764,EVM0008834,EVM0009725,EVM0017791,EVM0002929,EVM0019539,EVM0021657,EVM0012221,EVM0020401,EVM0016148,EVM0021257,EVM0011454,EVM0016226,EVM0027191,EVM0016947,EVM0018804,EVM0023791,EVM0023471,EVM0023075,EVM0009680,EVM0000887,EVM0000400,EVM0000008,EVM0018351,EVM0012294,EVM0016452,EVM0015243,EVM0017981,EVM0015522,EVM0010995,EVM0009824,EVM0005267,EVM0004979,EVM0005508,EVM0017292,EVM0001826,EVM…	2.34e-15
darkred	Biological process	regulation of macromolecule biosynthetic process	GO:0010556	6	1.11e-16	6.06146	48	1795	49	11107	EVM0005764,EVM0008834,EVM0009725,EVM0017791,EVM0002929,EVM0019539,EVM0021657,EVM0012221,EVM0020401,EVM0016148,EVM0021257,EVM0011454,EVM0016226,EVM0027191,EVM0016947,EVM0018804,EVM0023791,EVM0023471,EVM0023075,EVM0009680,EVM0000887,EVM0000400,EVM0000008,EVM0018351,EVM0012294,EVM0016452,EVM0015243,EVM0017981,EVM0015522,EVM0010995,EVM0009824,EVM0005267,EVM0004979,EVM0005508,EVM0017292,EVM0001826,EVM…	2.34e-15
darkred	Biological process	cellular aromatic compound metabolic process	GO:0006725	4	1.11e-16	2.83631	49	3916	49	11107	EVM0005764,EVM0008834,EVM0009725,EVM0017791,EVM0002929,EVM0019539,EVM0021657,EVM0012221,EVM0020401,EVM0016148,EVM0021257,EVM0011454,EVM0016226,EVM0027191,EVM0016947,EVM0018804,EVM0023791,EVM0023471,EVM0023075,EVM0009680,EVM0000887,EVM0000400,EVM0000008,EVM0018351,EVM0012294,EVM0016452,EVM0015243,EVM0017981,EVM0015522,EVM0010995,EVM0009824,EVM0005267,EVM0004979,EVM0005508,EVM0017292,EVM0001826,EVM…	2.34e-15
darkred	Biological process	biological regulation	GO:0065007	2	2.22e-16	2.25569	49	4924	49	11107	EVM0005764,EVM0008834,EVM0009725,EVM0017791,EVM0002929,EVM0019539,EVM0021657,EVM0012221,EVM0020401,EVM0016148,EVM0021257,EVM0011454,EVM0016226,EVM0027191,EVM0016947,EVM0018804,EVM0023791,EVM0023471,EVM0023075,EVM0009680,EVM0000887,EVM0000400,EVM0000008,EVM0018351,EVM0012294,EVM0016452,EVM0015243,EVM0017981,EVM0015522,EVM0010995,EVM0009824,EVM0005267,EVM0004979,EVM0005508,EVM0017292,EVM0001826,EVM…	4.18e-15
darkred	Biological process	regulation of cellular metabolic process	GO:0031323	5	2.22e-16	4.78256	48	2275	49	11107	EVM0005764,EVM0008834,EVM0009725,EVM0017791,EVM0002929,EVM0019539,EVM0021657,EVM0012221,EVM0020401,EVM0016148,EVM0021257,EVM0011454,EVM0016226,EVM0027191,EVM0016947,EVM0018804,EVM0023791,EVM0023471,EVM0023075,EVM0009680,EVM0000887,EVM0000400,EVM0000008,EVM0018351,EVM0012294,EVM0016452,EVM0015243,EVM0017981,EVM0015522,EVM0010995,EVM0009824,EVM0005267,EVM0004979,EVM0005508,EVM0017292,EVM0001826,EVM…	4.18e-15
darkred	Biological process	gene expression	GO:0010467	5	3.33e-16	3.85417	48	2823	49	11107	EVM0005764,EVM0008834,EVM0009725,EVM0017791,EVM0002929,EVM0019539,EVM0021657,EVM0012221,EVM0020401,EVM0016148,EVM0021257,EVM0011454,EVM0016226,EVM0027191,EVM0016947,EVM0018804,EVM0023791,EVM0023471,EVM0023075,EVM0009680,EVM0000887,EVM0000400,EVM0000008,EVM0018351,EVM0012294,EVM0016452,EVM0015243,EVM0017981,EVM0015522,EVM0010995,EVM0009824,EVM0005267,EVM0004979,EVM0005508,EVM0017292,EVM0001826,EVM…	5.94e-15
darkred	Biological process	cellular nitrogen compound biosynthetic process	GO:0044271	5	3.33e-16	4.29204	48	2535	49	11107	EVM0005764,EVM0008834,EVM0009725,EVM0017791,EVM0002929,EVM0019539,EVM0021657,EVM0012221,EVM0020401,EVM0016148,EVM0021257,EVM0011454,EVM0016226,EVM0027191,EVM0016947,EVM0018804,EVM0023791,EVM0023471,EVM0023075,EVM0009680,EVM0000887,EVM0000400,EVM0000008,EVM0018351,EVM0012294,EVM0016452,EVM0015243,EVM0017981,EVM0015522,EVM0010995,EVM0009824,EVM0005267,EVM0004979,EVM0005508,EVM0017292,EVM0001826,EVM…	5.94e-15
darkred	Biological process	macromolecule metabolic process	GO:0043170	4	2.11e-15	1.98304	49	5601	49	11107	EVM0005764,EVM0008834,EVM0009725,EVM0017791,EVM0002929,EVM0019539,EVM0021657,EVM0012221,EVM0020401,EVM0016148,EVM0021257,EVM0011454,EVM0016226,EVM0027191,EVM0016947,EVM0018804,EVM0023791,EVM0023471,EVM0023075,EVM0009680,EVM0000887,EVM0000400,EVM0000008,EVM0018351,EVM0012294,EVM0016452,EVM0015243,EVM0017981,EVM0015522,EVM0010995,EVM0009824,EVM0005267,EVM0004979,EVM0005508,EVM0017292,EVM0001826,EVM…	3.58e-14
darkred	Biological process	nitrogen compound metabolic process	GO:0006807	3	7.86e-14	1.84778	49	6011	49	11107	EVM0005764,EVM0008834,EVM0009725,EVM0017791,EVM0002929,EVM0019539,EVM0021657,EVM0012221,EVM0020401,EVM0016148,EVM0021257,EVM0011454,EVM0016226,EVM0027191,EVM0016947,EVM0018804,EVM0023791,EVM0023471,EVM0023075,EVM0009680,EVM0000887,EVM0000400,EVM0000008,EVM0018351,EVM0012294,EVM0016452,EVM0015243,EVM0017981,EVM0015522,EVM0010995,EVM0009824,EVM0005267,EVM0004979,EVM0005508,EVM0017292,EVM0001826,EVM…	1.3e-12
darkred	Biological process	primary metabolic process	GO:0044238	3	1.15e-11	1.66972	49	6652	49	11107	EVM0005764,EVM0008834,EVM0009725,EVM0017791,EVM0002929,EVM0019539,EVM0021657,EVM0012221,EVM0020401,EVM0016148,EVM0021257,EVM0011454,EVM0016226,EVM0027191,EVM0016947,EVM0018804,EVM0023791,EVM0023471,EVM0023075,EVM0009680,EVM0000887,EVM0000400,EVM0000008,EVM0018351,EVM0012294,EVM0016452,EVM0015243,EVM0017981,EVM0015522,EVM0010995,EVM0009824,EVM0005267,EVM0004979,EVM0005508,EVM0017292,EVM0001826,EVM…	1.86e-10
darkred	Biological process	cellular metabolic process	GO:0044237	3	2.33e-10	1.57056	49	7072	49	11107	EVM0005764,EVM0008834,EVM0009725,EVM0017791,EVM0002929,EVM0019539,EVM0021657,EVM0012221,EVM0020401,EVM0016148,EVM0021257,EVM0011454,EVM0016226,EVM0027191,EVM0016947,EVM0018804,EVM0023791,EVM0023471,EVM0023075,EVM0009680,EVM0000887,EVM0000400,EVM0000008,EVM0018351,EVM0012294,EVM0016452,EVM0015243,EVM0017981,EVM0015522,EVM0010995,EVM0009824,EVM0005267,EVM0004979,EVM0005508,EVM0017292,EVM0001826,EVM…	3.68e-09
darkred	Biological process	organic substance metabolic process	GO:0071704	3	2.34e-10	1.57034	49	7073	49	11107	EVM0005764,EVM0008834,EVM0009725,EVM0017791,EVM0002929,EVM0019539,EVM0021657,EVM0012221,EVM0020401,EVM0016148,EVM0021257,EVM0011454,EVM0016226,EVM0027191,EVM0016947,EVM0018804,EVM0023791,EVM0023471,EVM0023075,EVM0009680,EVM0000887,EVM0000400,EVM0000008,EVM0018351,EVM0012294,EVM0016452,EVM0015243,EVM0017981,EVM0015522,EVM0010995,EVM0009824,EVM0005267,EVM0004979,EVM0005508,EVM0017292,EVM0001826,EVM…	3.63e-09
darkred	Biological process	positive regulation of RNA biosynthetic process	GO:1902680	9	4.72e-10	7.53903	15	451	49	11107	EVM0008834,EVM0019539,EVM0011454,EVM0016226,EVM0016947,EVM0023471,EVM0000400,EVM0016452,EVM0009824,EVM0012042,EVM0017816,EVM0009980,EVM0006841,EVM0023525,EVM0010890,	7.15e-09
darkred	Biological process	positive regulation of nucleic acid-templated transcription	GO:1903508	10	4.72e-10	7.53903	15	451	49	11107	EVM0008834,EVM0019539,EVM0011454,EVM0016226,EVM0016947,EVM0023471,EVM0000400,EVM0016452,EVM0009824,EVM0012042,EVM0017816,EVM0009980,EVM0006841,EVM0023525,EVM0010890,	7.15e-09
darkred	Biological process	positive regulation of macromolecule biosynthetic process	GO:0010557	7	2.58e-09	6.66687	15	510	49	11107	EVM0008834,EVM0019539,EVM0011454,EVM0016226,EVM0016947,EVM0023471,EVM0000400,EVM0016452,EVM0009824,EVM0012042,EVM0017816,EVM0009980,EVM0006841,EVM0023525,EVM0010890,	3.73e-08
darkred	Biological process	positive regulation of RNA metabolic process	GO:0051254	8	3.27e-09	6.55126	15	519	49	11107	EVM0008834,EVM0019539,EVM0011454,EVM0016226,EVM0016947,EVM0023471,EVM0000400,EVM0016452,EVM0009824,EVM0012042,EVM0017816,EVM0009980,EVM0006841,EVM0023525,EVM0010890,	4.65e-08
darkred	Biological process	positive regulation of cellular biosynthetic process	GO:0031328	7	4.24e-09	6.42741	15	529	49	11107	EVM0008834,EVM0019539,EVM0011454,EVM0016226,EVM0016947,EVM0023471,EVM0000400,EVM0016452,EVM0009824,EVM0012042,EVM0017816,EVM0009980,EVM0006841,EVM0023525,EVM0010890,	5.91e-08
darkred	Biological process	positive regulation of biosynthetic process	GO:0009891	6	7.75e-09	6.14847	15	553	49	11107	EVM0008834,EVM0019539,EVM0011454,EVM0016226,EVM0016947,EVM0023471,EVM0000400,EVM0016452,EVM0009824,EVM0012042,EVM0017816,EVM0009980,EVM0006841,EVM0023525,EVM0010890,	1.06e-07
darkred	Biological process	positive regulation of nucleobase-containing compound metabolic process	GO:0045935	7	8.76e-09	6.09337	15	558	49	11107	EVM0008834,EVM0019539,EVM0011454,EVM0016226,EVM0016947,EVM0023471,EVM0000400,EVM0016452,EVM0009824,EVM0012042,EVM0017816,EVM0009980,EVM0006841,EVM0023525,EVM0010890,	1.17e-07
darkred	Biological process	metabolic process	GO:0008152	2	1.87e-08	1.4365	49	7732	49	11107	EVM0005764,EVM0008834,EVM0009725,EVM0017791,EVM0002929,EVM0019539,EVM0021657,EVM0012221,EVM0020401,EVM0016148,EVM0021257,EVM0011454,EVM0016226,EVM0027191,EVM0016947,EVM0018804,EVM0023791,EVM0023471,EVM0023075,EVM0009680,EVM0000887,EVM0000400,EVM0000008,EVM0018351,EVM0012294,EVM0016452,EVM0015243,EVM0017981,EVM0015522,EVM0010995,EVM0009824,EVM0005267,EVM0004979,EVM0005508,EVM0017292,EVM0001826,EVM…	2.46e-07
darkred	Biological process	positive regulation of DNA-templated transcription	GO:0045893	11	2.62e-08	6.86889	13	429	49	11107	EVM0008834,EVM0016226,EVM0016947,EVM0023471,EVM0000400,EVM0016452,EVM0009824,EVM0012042,EVM0017816,EVM0009980,EVM0006841,EVM0023525,EVM0010890,	3.38e-07
darkred	Biological process	positive regulation of nitrogen compound metabolic process	GO:0051173	6	2.43e-07	4.74212	15	717	49	11107	EVM0008834,EVM0019539,EVM0011454,EVM0016226,EVM0016947,EVM0023471,EVM0000400,EVM0016452,EVM0009824,EVM0012042,EVM0017816,EVM0009980,EVM0006841,EVM0023525,EVM0010890,	3.08e-06
darkred	Biological process	positive regulation of gene expression	GO:0010628	7	3.24e-07	5.53901	13	532	49	11107	EVM0008834,EVM0016226,EVM0016947,EVM0023471,EVM0000400,EVM0016452,EVM0009824,EVM0012042,EVM0017816,EVM0009980,EVM0006841,EVM0023525,EVM0010890,	4.02e-06
darkred	Biological process	positive regulation of cellular metabolic process	GO:0031325	6	4.74e-07	4.50345	15	755	49	11107	EVM0008834,EVM0019539,EVM0011454,EVM0016226,EVM0016947,EVM0023471,EVM0000400,EVM0016452,EVM0009824,EVM0012042,EVM0017816,EVM0009980,EVM0006841,EVM0023525,EVM0010890,	5.78e-06
darkred	Biological process	positive regulation of macromolecule metabolic process	GO:0010604	6	6.62e-07	4.38723	15	775	49	11107	EVM0008834,EVM0019539,EVM0011454,EVM0016226,EVM0016947,EVM0023471,EVM0000400,EVM0016452,EVM0009824,EVM0012042,EVM0017816,EVM0009980,EVM0006841,EVM0023525,EVM0010890,	7.95e-06
darkred	Biological process	positive regulation of metabolic process	GO:0009893	5	2.29e-06	3.97673	15	855	49	11107	EVM0008834,EVM0019539,EVM0011454,EVM0016226,EVM0016947,EVM0023471,EVM0000400,EVM0016452,EVM0009824,EVM0012042,EVM0017816,EVM0009980,EVM0006841,EVM0023525,EVM0010890,	2.71e-05
darkred	Biological process	positive regulation of cellular process	GO:0048522	5	8.65e-06	3.35813	16	1080	49	11107	EVM0008834,EVM0009725,EVM0019539,EVM0011454,EVM0016226,EVM0016947,EVM0023471,EVM0000400,EVM0016452,EVM0009824,EVM0012042,EVM0017816,EVM0009980,EVM0006841,EVM0023525,EVM0010890,	0.000100304
darkred	Biological process	response to nitrogen compound	GO:1901698	4	8.73e-06	5.58309	10	406	49	11107	EVM0005764,EVM0009725,EVM0016148,EVM0027191,EVM0016947,EVM0017981,EVM0005267,EVM0004979,EVM0009980,EVM0017923,	9.96e-05
darkred	Biological process	post-embryonic development	GO:0009791	3	1.33e-05	2.79481	19	1541	49	11107	EVM0008834,EVM0002929,EVM0019539,EVM0020401,EVM0011454,EVM0016947,EVM0000887,EVM0000400,EVM0012294,EVM0016452,EVM0015243,EVM0017981,EVM0005508,EVM0017292,EVM0000935,EVM0023458,EVM0017778,EVM0005994,EVM0023525,	0.000149643
darkred	Biological process	regulation of response to stimulus	GO:0048583	4	2.83e-05	3.44563	14	921	49	11107	EVM0009725,EVM0019539,EVM0011454,EVM0027191,EVM0016947,EVM0018804,EVM0016452,EVM0017981,EVM0005267,EVM0005508,EVM0017292,EVM0023458,EVM0009980,EVM0010890,	0.00031247
darkred	Biological process	response to chitin	GO:0010200	6	3.64e-05	9.51077	6	143	49	11107	EVM0005764,EVM0009725,EVM0027191,EVM0005267,EVM0004979,EVM0017923,	0.000395334
darkred	Biological process	response to red or far red light	GO:0009639	6	3.86e-05	7.41455	7	214	49	11107	EVM0019539,EVM0011454,EVM0016947,EVM0012294,EVM0005508,EVM0023458,EVM0017816,	0.000413326
darkred	Biological process	negative regulation of biological process	GO:0048519	4	3.97e-05	2.97521	16	1219	49	11107	EVM0019539,EVM0011454,EVM0016226,EVM0027191,EVM0016947,EVM0018804,EVM0000400,EVM0000008,EVM0015243,EVM0017981,EVM0005267,EVM0004979,EVM0023458,EVM0023525,EVM0010890,EVM0017923,	0.000419133
darkred	Biological process	photomorphogenesis	GO:0009640	7	4.03e-05	12.8792	5	88	49	11107	EVM0019539,EVM0011454,EVM0012294,EVM0005508,EVM0023458,	0.000419097
darkred	Biological process	positive regulation of biological process	GO:0048518	4	4.34e-05	2.81068	17	1371	49	11107	EVM0008834,EVM0009725,EVM0019539,EVM0011454,EVM0016226,EVM0016947,EVM0023471,EVM0000400,EVM0016452,EVM0009824,EVM0005267,EVM0012042,EVM0017816,EVM0009980,EVM0006841,EVM0023525,EVM0010890,	0.000444036
darkred	Biological process	regulation of post-embryonic development	GO:0048580	6	4.37e-05	5.23093	9	390	49	11107	EVM0019539,EVM0011454,EVM0016947,EVM0000887,EVM0016452,EVM0017981,EVM0017292,EVM0023458,EVM0023525,	0.000440876
darkred	Biological process	response to light stimulus	GO:0009416	5	8.88e-05	3.56032	12	764	49	11107	EVM0008834,EVM0019539,EVM0011454,EVM0016947,EVM0000887,EVM0012294,EVM0005508,EVM0017292,EVM0023458,EVM0017778,EVM0017816,EVM0010890,	0.000883292
darkred	Biological process	negative regulation of cellular process	GO:0048523	5	9.32e-05	3.29615	13	894	49	11107	EVM0019539,EVM0011454,EVM0016226,EVM0027191,EVM0016947,EVM0018804,EVM0000400,EVM0015243,EVM0017981,EVM0005267,EVM0004979,EVM0010890,EVM0017923,	0.000913636
darkred	Biological process	developmental process	GO:0032502	2	0.000121476	1.93929	26	3039	49	11107	EVM0008834,EVM0009725,EVM0002929,EVM0019539,EVM0020401,EVM0011454,EVM0016947,EVM0023471,EVM0000887,EVM0000400,EVM0012294,EVM0016452,EVM0015243,EVM0017981,EVM0010995,EVM0009824,EVM0005267,EVM0005508,EVM0017292,EVM0000935,EVM0023458,EVM0017778,EVM0017816,EVM0005994,EVM0006841,EVM0023525,	0.00114253
darkred	Biological process	regulation of developmental process	GO:0050793	4	0.000123872	3.43879	12	791	49	11107	EVM0019539,EVM0011454,EVM0016947,EVM0000887,EVM0000400,EVM0016452,EVM0015243,EVM0017981,EVM0005267,EVM0017292,EVM0023458,EVM0023525,	0.00114953
darkred	Biological process	response to radiation	GO:0009314	4	0.000170268	3.32528	12	818	49	11107	EVM0008834,EVM0019539,EVM0011454,EVM0016947,EVM0000887,EVM0012294,EVM0005508,EVM0017292,EVM0023458,EVM0017778,EVM0017816,EVM0010890,	0.00151931
darkred	Biological process	regulation of multicellular organismal development	GO:2000026	5	0.000199169	3.86156	10	587	49	11107	EVM0019539,EVM0011454,EVM0016947,EVM0000887,EVM0016452,EVM0017981,EVM0005267,EVM0017292,EVM0023458,EVM0023525,	0.00175471
darkred	Biological process	multicellular organism development	GO:0007275	4	0.000297596	2.0396	22	2445	49	11107	EVM0008834,EVM0002929,EVM0019539,EVM0020401,EVM0011454,EVM0016947,EVM0000887,EVM0000400,EVM0012294,EVM0016452,EVM0015243,EVM0017981,EVM0010995,EVM0005267,EVM0005508,EVM0017292,EVM0000935,EVM0023458,EVM0017778,EVM0017816,EVM0005994,EVM0023525,	0.0024955
darkred	Biological process	pigment biosynthetic process	GO:0046148	4	0.000327266	8.27275	5	137	49	11107	EVM0016947,EVM0017981,EVM0010995,EVM0023458,EVM0023525,	0.00271164
darkred	Biological process	anatomical structure development	GO:0048856	3	0.000402835	1.89817	24	2866	49	11107	EVM0008834,EVM0002929,EVM0019539,EVM0020401,EVM0011454,EVM0016947,EVM0000887,EVM0000400,EVM0012294,EVM0016452,EVM0015243,EVM0017981,EVM0010995,EVM0009824,EVM0005267,EVM0005508,EVM0017292,EVM0000935,EVM0023458,EVM0017778,EVM0017816,EVM0005994,EVM0006841,EVM0023525,	0.00318606
darkred	Biological process	response to abiotic stimulus	GO:0009628	3	0.000403876	2.1873	19	1969	49	11107	EVM0008834,EVM0009725,EVM0019539,EVM0016148,EVM0011454,EVM0016947,EVM0018804,EVM0000887,EVM0012294,EVM0016452,EVM0017981,EVM0005508,EVM0017292,EVM0012042,EVM0023458,EVM0017778,EVM0017816,EVM0009980,EVM0010890,	0.0031584
darkred	Biological process	negative regulation of nucleobase-containing compound metabolic process	GO:0045934	7	0.000434293	5.02125	7	316	49	11107	EVM0016226,EVM0027191,EVM0017981,EVM0005267,EVM0004979,EVM0010890,EVM0017923,	0.00335853
darkred	Biological process	negative regulation of DNA-templated transcription	GO:0045892	11	0.000549762	5.78741	6	235	49	11107	EVM0027191,EVM0017981,EVM0005267,EVM0004979,EVM0010890,EVM0017923,	0.00402773
darkred	Biological process	cellular response to starvation	GO:0009267	7	0.00055993	7.35953	5	154	49	11107	EVM0017981,EVM0010995,EVM0004979,EVM0009980,EVM0017923,	0.00405949
darkred	Biological process	hormone-mediated signaling pathway	GO:0009755	6	0.00056046	3.39332	10	668	49	11107	EVM0009725,EVM0016947,EVM0018804,EVM0016452,EVM0017981,EVM0005267,EVM0005508,EVM0023458,EVM0009980,EVM0027286,	0.00402144
darkred	Biological process	response to nutrient levels	GO:0031667	5	0.00056223	5.76288	6	236	49	11107	EVM0016947,EVM0017981,EVM0010995,EVM0004979,EVM0009980,EVM0017923,	0.00399298
darkred	Biological process	regulation of multicellular organismal process	GO:0051239	4	0.000580534	3.37814	10	671	49	11107	EVM0019539,EVM0011454,EVM0016947,EVM0000887,EVM0016452,EVM0017981,EVM0005267,EVM0017292,EVM0023458,EVM0023525,	0.00404052
darkred	Biological process	negative regulation of developmental process	GO:0051093	5	0.000629242	7.17321	5	158	49	11107	EVM0016947,EVM0015243,EVM0005267,EVM0023458,EVM0023525,	0.00429365
darkred	Biological process	negative regulation of cellular macromolecule biosynthetic process	GO:2000113	8	0.000733039	4.59917	7	345	49	11107	EVM0016226,EVM0027191,EVM0017981,EVM0005267,EVM0004979,EVM0010890,EVM0017923,	0.004859
darkred	Biological process	negative regulation of RNA biosynthetic process	GO:1902679	9	0.000809999	5.37566	6	253	49	11107	EVM0027191,EVM0017981,EVM0005267,EVM0004979,EVM0010890,EVM0017923,	0.0051721
darkred	Biological process	negative regulation of nucleic acid-templated transcription	GO:1903507	10	0.000809999	5.37566	6	253	49	11107	EVM0027191,EVM0017981,EVM0005267,EVM0004979,EVM0010890,EVM0017923,	0.0051721
darkred	Biological process	response to starvation	GO:0042594	6	0.000853192	6.70632	5	169	49	11107	EVM0017981,EVM0010995,EVM0004979,EVM0009980,EVM0017923,	0.00534975
darkred	Biological process	pigment metabolic process	GO:0042440	3	0.000876155	6.66687	5	170	49	11107	EVM0016947,EVM0017981,EVM0010995,EVM0023458,EVM0023525,	0.00544468
darkred	Biological process	shoot system development	GO:0048367	5	0.000988432	2.92654	11	852	49	11107	EVM0019539,EVM0020401,EVM0011454,EVM0016947,EVM0000887,EVM0000400,EVM0015243,EVM0017981,EVM0005267,EVM0017816,EVM0023525,	0.00608804
darkred	Biological process	cellular response to lipid	GO:0071396	6	0.00101338	3.81766	8	475	49	11107	EVM0009725,EVM0016947,EVM0018804,EVM0016452,EVM0017981,EVM0005267,EVM0023458,EVM0027286,	0.00618694
darkred	Biological process	negative regulation of nitrogen compound metabolic process	GO:0051172	6	0.00101338	3.81766	8	475	49	11107	EVM0016226,EVM0027191,EVM0000400,EVM0017981,EVM0005267,EVM0004979,EVM0010890,EVM0017923,	0.00618694
darkred	Biological process	negative regulation of macromolecule biosynthetic process	GO:0010558	7	0.00102073	4.34716	7	365	49	11107	EVM0016226,EVM0027191,EVM0017981,EVM0005267,EVM0004979,EVM0010890,EVM0017923,	0.00612438
darkred	Biological process	cellular response to nutrient levels	GO:0031669	6	0.00113198	6.29649	5	180	49	11107	EVM0017981,EVM0010995,EVM0004979,EVM0009980,EVM0017923,	0.00667675
darkred	Biological process	response to organonitrogen compound	GO:0010243	5	0.00113508	5.03719	6	270	49	11107	EVM0005764,EVM0009725,EVM0027191,EVM0005267,EVM0004979,EVM0017923,	0.00663881
darkred	Biological process	response to extracellular stimulus	GO:0009991	4	0.00122441	4.96365	6	274	49	11107	EVM0016947,EVM0017981,EVM0010995,EVM0004979,EVM0009980,EVM0017923,	0.0070429
darkred	Biological process	negative regulation of cellular biosynthetic process	GO:0031327	7	0.00130977	4.1646	7	381	49	11107	EVM0016226,EVM0027191,EVM0017981,EVM0005267,EVM0004979,EVM0010890,EVM0017923,	0.00747211
darkred	Biological process	multicellular organismal process	GO:0032501	2	0.00131175	1.84219	22	2707	49	11107	EVM0008834,EVM0002929,EVM0019539,EVM0020401,EVM0011454,EVM0016947,EVM0000887,EVM0000400,EVM0012294,EVM0016452,EVM0015243,EVM0017981,EVM0010995,EVM0005267,EVM0005508,EVM0017292,EVM0000935,EVM0023458,EVM0017778,EVM0017816,EVM0005994,EVM0023525,	0.00742257
darkred	Biological process	negative regulation of cellular metabolic process	GO:0031324	6	0.00132161	3.66341	8	495	49	11107	EVM0016226,EVM0027191,EVM0000400,EVM0017981,EVM0005267,EVM0004979,EVM0010890,EVM0017923,	0.00741808
darkred	Biological process	negative regulation of RNA metabolic process	GO:0051253	8	0.00136843	4.85729	6	280	49	11107	EVM0027191,EVM0017981,EVM0005267,EVM0004979,EVM0010890,EVM0017923,	0.0076194
darkred	Biological process	negative regulation of biosynthetic process	GO:0009890	6	0.00145487	4.08947	7	388	49	11107	EVM0016226,EVM0027191,EVM0017981,EVM0005267,EVM0004979,EVM0010890,EVM0017923,	0.00797317
darkred	Biological process	cell differentiation	GO:0030154	4	0.00149893	2.98648	10	759	49	11107	EVM0009725,EVM0002929,EVM0019539,EVM0011454,EVM0016947,EVM0023471,EVM0000400,EVM0016452,EVM0015243,EVM0010995,	0.00815043
darkred	Biological process	negative regulation of macromolecule metabolic process	GO:0010605	6	0.00163333	3.20764	9	636	49	11107	EVM0016226,EVM0027191,EVM0000400,EVM0000008,EVM0017981,EVM0005267,EVM0004979,EVM0010890,EVM0017923,	0.00881236
darkred	Biological process	cellular response to hormone stimulus	GO:0032870	6	0.00183958	2.90607	10	780	49	11107	EVM0009725,EVM0016947,EVM0018804,EVM0016452,EVM0017981,EVM0005267,EVM0005508,EVM0023458,EVM0009980,EVM0027286,	0.00984884
darkred	Biological process	system development	GO:0048731	4	0.00203976	2.04427	17	1885	49	11107	EVM0008834,EVM0019539,EVM0020401,EVM0011454,EVM0016947,EVM0000887,EVM0000400,EVM0016452,EVM0015243,EVM0017981,EVM0010995,EVM0005267,EVM0017292,EVM0000935,EVM0017778,EVM0017816,EVM0023525,	0.0107551
darkred	Biological process	cellular process	GO:0009987	2	0.00229159	1.13175	49	9814	49	11107	EVM0005764,EVM0008834,EVM0009725,EVM0017791,EVM0002929,EVM0019539,EVM0021657,EVM0012221,EVM0020401,EVM0016148,EVM0021257,EVM0011454,EVM0016226,EVM0027191,EVM0016947,EVM0018804,EVM0023791,EVM0023471,EVM0023075,EVM0009680,EVM0000887,EVM0000400,EVM0000008,EVM0018351,EVM0012294,EVM0016452,EVM0015243,EVM0017981,EVM0015522,EVM0010995,EVM0009824,EVM0005267,EVM0004979,EVM0005508,EVM0017292,EVM0001826,EVM…	0.0119026
darkred	Biological process	regulation of reproductive process	GO:2000241	4	0.00248431	4.31759	6	315	49	11107	EVM0016947,EVM0000887,EVM0016452,EVM0017981,EVM0017292,EVM0023525,	0.012808
darkred	Biological process	negative regulation of metabolic process	GO:0009892	5	0.00250815	3.01338	9	677	49	11107	EVM0016226,EVM0027191,EVM0000400,EVM0000008,EVM0017981,EVM0005267,EVM0004979,EVM0010890,EVM0017923,	0.0128358
darkred	Biological process	shoot system morphogenesis	GO:0010016	4	0.00257672	5.22289	5	217	49	11107	EVM0019539,EVM0011454,EVM0000400,EVM0017981,EVM0017816,	0.0130905
darkred	Biological process	cellular response to extracellular stimulus	GO:0031668	5	0.00257672	5.22289	5	217	49	11107	EVM0017981,EVM0010995,EVM0004979,EVM0009980,EVM0017923,	0.0130905
darkred	Biological process	response to oxygen-containing compound	GO:1901700	4	0.0026569	2.13843	15	1590	49	11107	EVM0005764,EVM0009725,EVM0016148,EVM0027191,EVM0016947,EVM0018804,EVM0016452,EVM0017981,EVM0005267,EVM0004979,EVM0012042,EVM0023458,EVM0009980,EVM0017923,EVM0027286,	0.0133036
darkred	Biological process	cellular response to endogenous stimulus	GO:0071495	4	0.00298728	2.72117	10	833	49	11107	EVM0009725,EVM0016947,EVM0018804,EVM0016452,EVM0017981,EVM0005267,EVM0005508,EVM0023458,EVM0009980,EVM0027286,	0.0148511
darkred	Biological process	regulation of transcription by RNA polymerase II	GO:0006357	11	0.0030384	4.14647	6	328	49	11107	EVM0008834,EVM0009725,EVM0016947,EVM0023471,EVM0016452,EVM0009980,	0.0149981
darkred	Biological process	cellular response to external stimulus	GO:0071496	4	0.0030709	5.0149	5	226	49	11107	EVM0017981,EVM0010995,EVM0004979,EVM0009980,EVM0017923,	0.0150517
darkred	Biological process	cellular response to organic substance	GO:0071310	5	0.00319341	2.52881	11	986	49	11107	EVM0005764,EVM0009725,EVM0016947,EVM0018804,EVM0016452,EVM0017981,EVM0005267,EVM0005508,EVM0023458,EVM0009980,EVM0027286,	0.0154348
darkred	Biological process	cellular response to chemical stimulus	GO:0070887	4	0.00462943	2.09606	14	1514	49	11107	EVM0005764,EVM0009725,EVM0016947,EVM0018804,EVM0016452,EVM0017981,EVM0005267,EVM0004979,EVM0005508,EVM0023458,EVM0009980,EVM0010890,EVM0017923,EVM0027286,	0.0214805
darkred	Biological process	regulation of signal transduction	GO:0009966	6	0.00484935	3.29878	7	481	49	11107	EVM0009725,EVM0016947,EVM0018804,EVM0016452,EVM0017981,EVM0005508,EVM0009980,	0.022352
darkred	Biological process	transcription by RNA polymerase II	GO:0006366	11	0.00606526	3.59799	6	378	49	11107	EVM0008834,EVM0009725,EVM0016947,EVM0023471,EVM0016452,EVM0009980,	0.027235
darkred	Biological process	negative regulation of gene expression	GO:0010629	7	0.00617384	3.1545	7	503	49	11107	EVM0027191,EVM0000008,EVM0017981,EVM0005267,EVM0004979,EVM0010890,EVM0017923,	0.0275448
darkred	Biological process	response to acid chemical	GO:0001101	4	0.00621944	2.31729	11	1076	49	11107	EVM0009725,EVM0016148,EVM0027191,EVM0016947,EVM0016452,EVM0017981,EVM0005267,EVM0012042,EVM0023458,EVM0009980,EVM0027286,	0.0275715
darkred	Biological process	regulation of signaling	GO:0023051	4	0.00650953	3.12345	7	508	49	11107	EVM0009725,EVM0016947,EVM0018804,EVM0016452,EVM0017981,EVM0005508,EVM0009980,	0.0286749
darkred	Biological process	cellular developmental process	GO:0048869	3	0.00668846	2.42951	10	933	49	11107	EVM0009725,EVM0002929,EVM0019539,EVM0011454,EVM0016947,EVM0023471,EVM0000400,EVM0016452,EVM0015243,EVM0010995,	0.0292778
darkred	Biological process	regulation of cell communication	GO:0010646	5	0.00678782	3.09905	7	512	49	11107	EVM0009725,EVM0016947,EVM0018804,EVM0016452,EVM0017981,EVM0005508,EVM0009980,	0.0293436
darkred	Biological process	response to external stimulus	GO:0009605	3	0.00792916	2.0492	13	1438	49	11107	EVM0009725,EVM0027191,EVM0016947,EVM0017981,EVM0010995,EVM0005267,EVM0004979,EVM0005508,EVM0023458,EVM0009980,EVM0010890,EVM0017923,EVM0027286,	0.034066
darkred	Biological process	cellular response to oxygen-containing compound	GO:1901701	5	0.0102204	2.61672	8	693	49	11107	EVM0009725,EVM0016947,EVM0018804,EVM0016452,EVM0017981,EVM0005267,EVM0023458,EVM0027286,	0.042091
darkred	Biological process	reproductive system development	GO:0061458	5	0.0103914	2.16067	11	1154	49	11107	EVM0008834,EVM0020401,EVM0016947,EVM0000887,EVM0016452,EVM0015243,EVM0017981,EVM0017292,EVM0000935,EVM0017778,EVM0023525,	0.0425438
darkred	Biological process	reproductive structure development	GO:0048608	4	0.0103914	2.16067	11	1154	49	11107	EVM0008834,EVM0020401,EVM0016947,EVM0000887,EVM0016452,EVM0015243,EVM0017981,EVM0017292,EVM0000935,EVM0017778,EVM0023525,	0.0425438
darkred	Biological process	positive regulation of response to stimulus	GO:0048584	5	0.0120617	3.60945	5	314	49	11107	EVM0009725,EVM0019539,EVM0011454,EVM0005267,EVM0010890,	0.0479712
darkred	Biological process	tissue development	GO:0009888	4	0.0146856	2.45384	8	739	49	11107	EVM0020401,EVM0000400,EVM0015243,EVM0017981,EVM0010995,EVM0009824,EVM0005994,EVM0006841,	0.054368
darkred	Biological process	response to lipid	GO:0033993	5	0.0158323	2.26171	9	902	49	11107	EVM0009725,EVM0016947,EVM0018804,EVM0016452,EVM0017981,EVM0005267,EVM0012042,EVM0023458,EVM0027286,	0.058303
darkred	Biological process	response to organic substance	GO:0010033	4	0.0164843	1.75898	15	1933	49	11107	EVM0005764,EVM0009725,EVM0027191,EVM0016947,EVM0018804,EVM0016452,EVM0017981,EVM0005267,EVM0004979,EVM0005508,EVM0012042,EVM0023458,EVM0009980,EVM0017923,EVM0027286,	0.0600683
darkred	Biological process	response to water deprivation	GO:0009414	6	0.0169138	3.31394	5	342	49	11107	EVM0009725,EVM0016148,EVM0016452,EVM0017981,EVM0009980,	0.0606804
darkred	Biological process	response to water	GO:0009415	5	0.0176994	3.27563	5	346	49	11107	EVM0009725,EVM0016148,EVM0016452,EVM0017981,EVM0009980,	0.061594
darkred	Biological process	response to hormone	GO:0009725	5	0.02994	1.786	12	1523	49	11107	EVM0009725,EVM0027191,EVM0016947,EVM0018804,EVM0016452,EVM0017981,EVM0005267,EVM0005508,EVM0012042,EVM0023458,EVM0009980,EVM0027286,	0.0934449
darkred	Biological process	plant organ development	GO:0099402	4	0.0312978	2.01189	9	1014	49	11107	EVM0019539,EVM0020401,EVM0011454,EVM0016947,EVM0015243,EVM0017981,EVM0010995,EVM0005267,EVM0023525,	0.0968146
darkred	Biological process	developmental process involved in reproduction	GO:0003006	3	0.0328884	1.82534	11	1366	49	11107	EVM0008834,EVM0020401,EVM0016947,EVM0000887,EVM0016452,EVM0015243,EVM0017981,EVM0017292,EVM0000935,EVM0017778,EVM0023525,	0.100396
darkred	Biological process	cell communication	GO:0007154	3	0.0336132	1.65628	14	1916	49	11107	EVM0005764,EVM0009725,EVM0016947,EVM0018804,EVM0016452,EVM0017981,EVM0010995,EVM0005267,EVM0004979,EVM0005508,EVM0023458,EVM0009980,EVM0017923,EVM0027286,	0.101276
darkred	Biological process	plant organ morphogenesis	GO:1905392	4	0.0355618	2.72444	5	416	49	11107	EVM0019539,EVM0020401,EVM0011454,EVM0017981,EVM0010995,	0.103129
darkred	Biological process	response to endogenous stimulus	GO:0009719	3	0.0368712	1.73254	12	1570	49	11107	EVM0009725,EVM0027191,EVM0016947,EVM0018804,EVM0016452,EVM0017981,EVM0005267,EVM0005508,EVM0012042,EVM0023458,EVM0009980,EVM0027286,	0.106483
darkred	Biological process	response to xenobiotic stimulus	GO:0009410	4	0.0385326	2.04671	8	886	49	11107	EVM0005764,EVM0009725,EVM0027191,EVM0016452,EVM0005267,EVM0004979,EVM0009980,EVM0017923,	0.110365
green	Molecular function	transcription regulator activity	GO:0140110	2	0	7.28256	36	1221	38	9386	EVM0003343,EVM0006652,EVM0009844,EVM0002135,EVM0022581,EVM0006491,EVM0004121,EVM0006466,EVM0002307,EVM0012493,EVM0017026,EVM0021760,EVM0022254,EVM0008219,EVM0001141,EVM0000574,EVM0005784,EVM0008699,EVM0016249,EVM0013214,EVM0005260,EVM0003694,EVM0025660,EVM0027961,EVM0001437,EVM0003932,EVM0014574,EVM0014133,EVM0016557,EVM0014215,EVM0015862,EVM0013600,EVM0006087,EVM0006560,EVM0023200,EVM0012756,	0
green	Molecular function	DNA-binding transcription factor activity	GO:0003700	3	0	7.11257	33	1146	38	9386	EVM0003343,EVM0002135,EVM0022581,EVM0006491,EVM0004121,EVM0006466,EVM0002307,EVM0012493,EVM0017026,EVM0021760,EVM0022254,EVM0008219,EVM0001141,EVM0000574,EVM0005784,EVM0008699,EVM0016249,EVM0013214,EVM0005260,EVM0003694,EVM0025660,EVM0027961,EVM0001437,EVM0003932,EVM0014574,EVM0016557,EVM0014215,EVM0015862,EVM0013600,EVM0006087,EVM0006560,EVM0023200,EVM0012756,	0
green	Molecular function	sequence-specific DNA binding	GO:0043565	6	6.32e-08	5.5328	14	625	38	9386	EVM0003343,EVM0006491,EVM0012493,EVM0021760,EVM0008219,EVM0001141,EVM0000574,EVM0018501,EVM0025660,EVM0003932,EVM0014574,EVM0014215,EVM0006087,EVM0023200,	1.12e-06
green	Molecular function	DNA binding	GO:0003677	5	3.44e-07	4.09534	16	965	38	9386	EVM0003343,EVM0022581,EVM0006491,EVM0012493,EVM0021760,EVM0008219,EVM0001141,EVM0000574,EVM0018501,EVM0025660,EVM0003932,EVM0014574,EVM0014215,EVM0013600,EVM0006087,EVM0023200,	4.56e-06
green	Molecular function	transcription regulatory region nucleic acid binding	GO:0001067	5	0.000348872	5.13056	7	337	38	9386	EVM0003343,EVM0012493,EVM0000574,EVM0025660,EVM0014574,EVM0014215,EVM0006087,	0.0030817
green	Molecular function	transcription cis-regulatory region binding	GO:0000976	8	0.000348872	5.13056	7	337	38	9386	EVM0003343,EVM0012493,EVM0000574,EVM0025660,EVM0014574,EVM0014215,EVM0006087,	0.0030817
green	Molecular function	double-stranded DNA binding	GO:0003690	6	0.00038167	4.35242	8	454	38	9386	EVM0003343,EVM0012493,EVM0000574,EVM0018501,EVM0025660,EVM0014574,EVM0014215,EVM0006087,	0.00252856
green	Molecular function	nucleic acid binding	GO:0003676	4	0.000528142	2.13135	18	2086	38	9386	EVM0003343,EVM0022664,EVM0022581,EVM0006491,EVM0012493,EVM0021760,EVM0008219,EVM0001141,EVM0000574,EVM0005784,EVM0018501,EVM0025660,EVM0003932,EVM0014574,EVM0014215,EVM0013600,EVM0006087,EVM0023200,	0.00311017
green	Molecular function	sequence-specific double-stranded DNA binding	GO:1990837	7	0.000592827	4.69837	7	368	38	9386	EVM0003343,EVM0012493,EVM0000574,EVM0025660,EVM0014574,EVM0014215,EVM0006087,	0.00314198
green	Molecular function	heterocyclic compound binding	GO:1901363	3	0.00326668	1.83871	18	2418	38	9386	EVM0003343,EVM0022664,EVM0022581,EVM0006491,EVM0012493,EVM0021760,EVM0008219,EVM0001141,EVM0000574,EVM0005784,EVM0018501,EVM0025660,EVM0003932,EVM0014574,EVM0014215,EVM0013600,EVM0006087,EVM0023200,	0.0144279
green	Molecular function	organic cyclic compound binding	GO:0097159	3	0.00339623	1.83265	18	2426	38	9386	EVM0003343,EVM0022664,EVM0022581,EVM0006491,EVM0012493,EVM0021760,EVM0008219,EVM0001141,EVM0000574,EVM0005784,EVM0018501,EVM0025660,EVM0003932,EVM0014574,EVM0014215,EVM0013600,EVM0006087,EVM0023200,	0.0138462
green	Cellular component	nucleus	GO:0005634	6	3.17e-12	3.10715	25	3448	26	11142	EVM0003343,EVM0006652,EVM0009844,EVM0002135,EVM0022664,EVM0022581,EVM0002307,EVM0012493,EVM0021760,EVM0001141,EVM0000574,EVM0005784,EVM0016363,EVM0018501,EVM0013214,EVM0003694,EVM0025660,EVM0001437,EVM0014574,EVM0014133,EVM0016557,EVM0014215,EVM0006087,EVM0023200,EVM0012756,	1.36e-10
green	Cellular component	intracellular membrane-bounded organelle	GO:0043231	5	0.00145881	1.35837	25	7887	26	11142	EVM0003343,EVM0006652,EVM0009844,EVM0002135,EVM0022664,EVM0022581,EVM0002307,EVM0012493,EVM0021760,EVM0001141,EVM0000574,EVM0005784,EVM0016363,EVM0018501,EVM0013214,EVM0003694,EVM0025660,EVM0001437,EVM0014574,EVM0014133,EVM0016557,EVM0014215,EVM0006087,EVM0023200,EVM0012756,	0.0313645
green	Cellular component	membrane-bounded organelle	GO:0043227	4	0.00159588	1.35305	25	7918	26	11142	EVM0003343,EVM0006652,EVM0009844,EVM0002135,EVM0022664,EVM0022581,EVM0002307,EVM0012493,EVM0021760,EVM0001141,EVM0000574,EVM0005784,EVM0016363,EVM0018501,EVM0013214,EVM0003694,EVM0025660,EVM0001437,EVM0014574,EVM0014133,EVM0016557,EVM0014215,EVM0006087,EVM0023200,EVM0012756,	0.0228743
green	Cellular component	intracellular organelle	GO:0043229	4	0.00338533	1.30907	25	8184	26	11142	EVM0003343,EVM0006652,EVM0009844,EVM0002135,EVM0022664,EVM0022581,EVM0002307,EVM0012493,EVM0021760,EVM0001141,EVM0000574,EVM0005784,EVM0016363,EVM0018501,EVM0013214,EVM0003694,EVM0025660,EVM0001437,EVM0014574,EVM0014133,EVM0016557,EVM0014215,EVM0006087,EVM0023200,EVM0012756,	0.0363923
green	Cellular component	organelle	GO:0043226	3	0.00362713	1.30509	25	8209	26	11142	EVM0003343,EVM0006652,EVM0009844,EVM0002135,EVM0022664,EVM0022581,EVM0002307,EVM0012493,EVM0021760,EVM0001141,EVM0000574,EVM0005784,EVM0016363,EVM0018501,EVM0013214,EVM0003694,EVM0025660,EVM0001437,EVM0014574,EVM0014133,EVM0016557,EVM0014215,EVM0006087,EVM0023200,EVM0012756,	0.0311933
green	Biological process	RNA biosynthetic process	GO:0032774	8	0	6.3399	38	1707	39	11107	EVM0003343,EVM0006652,EVM0009844,EVM0002135,EVM0022664,EVM0022581,EVM0006491,EVM0027069,EVM0004121,EVM0006466,EVM0002307,EVM0012493,EVM0017026,EVM0021760,EVM0022254,EVM0008219,EVM0001141,EVM0000574,EVM0005784,EVM0008699,EVM0016249,EVM0013214,EVM0005260,EVM0003694,EVM0025660,EVM0027961,EVM0001437,EVM0003932,EVM0014574,EVM0014133,EVM0016557,EVM0014215,EVM0015862,EVM0013600,EVM0006087,EVM0006560,EVM…	0
green	Biological process	regulation of RNA metabolic process	GO:0051252	7	0	6.08396	37	1732	39	11107	EVM0003343,EVM0006652,EVM0009844,EVM0002135,EVM0022581,EVM0006491,EVM0027069,EVM0004121,EVM0006466,EVM0002307,EVM0012493,EVM0017026,EVM0021760,EVM0022254,EVM0008219,EVM0001141,EVM0000574,EVM0005784,EVM0008699,EVM0016249,EVM0013214,EVM0005260,EVM0003694,EVM0025660,EVM0027961,EVM0001437,EVM0003932,EVM0014574,EVM0014133,EVM0016557,EVM0014215,EVM0015862,EVM0013600,EVM0006087,EVM0006560,EVM0023200,EVM…	0
green	Biological process	nucleic acid metabolic process	GO:0090304	6	0	3.41229	39	3255	39	11107	EVM0003343,EVM0006652,EVM0009844,EVM0002135,EVM0022664,EVM0022581,EVM0006491,EVM0027069,EVM0004121,EVM0006466,EVM0002307,EVM0012493,EVM0017026,EVM0021760,EVM0022254,EVM0008219,EVM0001141,EVM0000574,EVM0005784,EVM0008699,EVM0018501,EVM0016249,EVM0013214,EVM0005260,EVM0003694,EVM0025660,EVM0027961,EVM0001437,EVM0003932,EVM0014574,EVM0014133,EVM0016557,EVM0014215,EVM0015862,EVM0013600,EVM0006087,EVM…	0
green	Biological process	DNA-templated transcription	GO:0006351	10	0	5.97591	35	1668	39	11107	EVM0003343,EVM0002135,EVM0022664,EVM0022581,EVM0006491,EVM0027069,EVM0004121,EVM0006466,EVM0002307,EVM0012493,EVM0017026,EVM0021760,EVM0022254,EVM0008219,EVM0001141,EVM0000574,EVM0005784,EVM0008699,EVM0016249,EVM0013214,EVM0005260,EVM0003694,EVM0025660,EVM0027961,EVM0001437,EVM0003932,EVM0014574,EVM0016557,EVM0014215,EVM0015862,EVM0013600,EVM0006087,EVM0006560,EVM0023200,EVM0012756,	0
green	Biological process	regulation of DNA-templated transcription	GO:0006355	10	0	6.09762	34	1588	39	11107	EVM0003343,EVM0002135,EVM0022581,EVM0006491,EVM0027069,EVM0004121,EVM0006466,EVM0002307,EVM0012493,EVM0017026,EVM0021760,EVM0022254,EVM0008219,EVM0001141,EVM0000574,EVM0005784,EVM0008699,EVM0016249,EVM0013214,EVM0005260,EVM0003694,EVM0025660,EVM0027961,EVM0001437,EVM0003932,EVM0014574,EVM0016557,EVM0014215,EVM0015862,EVM0013600,EVM0006087,EVM0006560,EVM0023200,EVM0012756,	0
green	Biological process	cellular biosynthetic process	GO:0044249	4	0	3.06058	38	3536	39	11107	EVM0003343,EVM0006652,EVM0009844,EVM0002135,EVM0022664,EVM0022581,EVM0006491,EVM0027069,EVM0004121,EVM0006466,EVM0002307,EVM0012493,EVM0017026,EVM0021760,EVM0022254,EVM0008219,EVM0001141,EVM0000574,EVM0005784,EVM0008699,EVM0016249,EVM0013214,EVM0005260,EVM0003694,EVM0025660,EVM0027961,EVM0001437,EVM0003932,EVM0014574,EVM0014133,EVM0016557,EVM0014215,EVM0015862,EVM0013600,EVM0006087,EVM0006560,EVM…	0
green	Biological process	regulation of primary metabolic process	GO:0080090	5	0	4.78538	37	2202	39	11107	EVM0003343,EVM0006652,EVM0009844,EVM0002135,EVM0022581,EVM0006491,EVM0027069,EVM0004121,EVM0006466,EVM0002307,EVM0012493,EVM0017026,EVM0021760,EVM0022254,EVM0008219,EVM0001141,EVM0000574,EVM0005784,EVM0008699,EVM0016249,EVM0013214,EVM0005260,EVM0003694,EVM0025660,EVM0027961,EVM0001437,EVM0003932,EVM0014574,EVM0014133,EVM0016557,EVM0014215,EVM0015862,EVM0013600,EVM0006087,EVM0006560,EVM0023200,EVM…	0
green	Biological process	gene expression	GO:0010467	5	0	3.83358	38	2823	39	11107	EVM0003343,EVM0006652,EVM0009844,EVM0002135,EVM0022664,EVM0022581,EVM0006491,EVM0027069,EVM0004121,EVM0006466,EVM0002307,EVM0012493,EVM0017026,EVM0021760,EVM0022254,EVM0008219,EVM0001141,EVM0000574,EVM0005784,EVM0008699,EVM0016249,EVM0013214,EVM0005260,EVM0003694,EVM0025660,EVM0027961,EVM0001437,EVM0003932,EVM0014574,EVM0014133,EVM0016557,EVM0014215,EVM0015862,EVM0013600,EVM0006087,EVM0006560,EVM…	0
green	Biological process	regulation of gene expression	GO:0010468	6	0	4.90777	34	1973	39	11107	EVM0003343,EVM0002135,EVM0022581,EVM0006491,EVM0027069,EVM0004121,EVM0006466,EVM0002307,EVM0012493,EVM0017026,EVM0021760,EVM0022254,EVM0008219,EVM0001141,EVM0000574,EVM0005784,EVM0008699,EVM0016249,EVM0013214,EVM0005260,EVM0003694,EVM0025660,EVM0027961,EVM0001437,EVM0003932,EVM0014574,EVM0016557,EVM0014215,EVM0015862,EVM0013600,EVM0006087,EVM0006560,EVM0023200,EVM0012756,	0
green	Biological process	regulation of RNA biosynthetic process	GO:2001141	8	0	6.51664	37	1617	39	11107	EVM0003343,EVM0006652,EVM0009844,EVM0002135,EVM0022581,EVM0006491,EVM0027069,EVM0004121,EVM0006466,EVM0002307,EVM0012493,EVM0017026,EVM0021760,EVM0022254,EVM0008219,EVM0001141,EVM0000574,EVM0005784,EVM0008699,EVM0016249,EVM0013214,EVM0005260,EVM0003694,EVM0025660,EVM0027961,EVM0001437,EVM0003932,EVM0014574,EVM0014133,EVM0016557,EVM0014215,EVM0015862,EVM0013600,EVM0006087,EVM0006560,EVM0023200,EVM…	0
green	Biological process	regulation of cellular macromolecule biosynthetic process	GO:2000112	7	0	5.51111	34	1757	39	11107	EVM0003343,EVM0002135,EVM0022581,EVM0006491,EVM0027069,EVM0004121,EVM0006466,EVM0002307,EVM0012493,EVM0017026,EVM0021760,EVM0022254,EVM0008219,EVM0001141,EVM0000574,EVM0005784,EVM0008699,EVM0016249,EVM0013214,EVM0005260,EVM0003694,EVM0025660,EVM0027961,EVM0001437,EVM0003932,EVM0014574,EVM0016557,EVM0014215,EVM0015862,EVM0013600,EVM0006087,EVM0006560,EVM0023200,EVM0012756,	0
green	Biological process	cellular nitrogen compound biosynthetic process	GO:0044271	5	0	4.26911	38	2535	39	11107	EVM0003343,EVM0006652,EVM0009844,EVM0002135,EVM0022664,EVM0022581,EVM0006491,EVM0027069,EVM0004121,EVM0006466,EVM0002307,EVM0012493,EVM0017026,EVM0021760,EVM0022254,EVM0008219,EVM0001141,EVM0000574,EVM0005784,EVM0008699,EVM0016249,EVM0013214,EVM0005260,EVM0003694,EVM0025660,EVM0027961,EVM0001437,EVM0003932,EVM0014574,EVM0014133,EVM0016557,EVM0014215,EVM0015862,EVM0013600,EVM0006087,EVM0006560,EVM…	0
green	Biological process	regulation of macromolecule biosynthetic process	GO:0010556	6	0	5.87042	37	1795	39	11107	EVM0003343,EVM0006652,EVM0009844,EVM0002135,EVM0022581,EVM0006491,EVM0027069,EVM0004121,EVM0006466,EVM0002307,EVM0012493,EVM0017026,EVM0021760,EVM0022254,EVM0008219,EVM0001141,EVM0000574,EVM0005784,EVM0008699,EVM0016249,EVM0013214,EVM0005260,EVM0003694,EVM0025660,EVM0027961,EVM0001437,EVM0003932,EVM0014574,EVM0014133,EVM0016557,EVM0014215,EVM0015862,EVM0013600,EVM0006087,EVM0006560,EVM0023200,EVM…	0
green	Biological process	nucleic acid-templated transcription	GO:0097659	9	0	6.39232	38	1693	39	11107	EVM0003343,EVM0006652,EVM0009844,EVM0002135,EVM0022664,EVM0022581,EVM0006491,EVM0027069,EVM0004121,EVM0006466,EVM0002307,EVM0012493,EVM0017026,EVM0021760,EVM0022254,EVM0008219,EVM0001141,EVM0000574,EVM0005784,EVM0008699,EVM0016249,EVM0013214,EVM0005260,EVM0003694,EVM0025660,EVM0027961,EVM0001437,EVM0003932,EVM0014574,EVM0014133,EVM0016557,EVM0014215,EVM0015862,EVM0013600,EVM0006087,EVM0006560,EVM…	0
green	Biological process	cellular aromatic compound metabolic process	GO:0006725	4	0	2.83631	39	3916	39	11107	EVM0003343,EVM0006652,EVM0009844,EVM0002135,EVM0022664,EVM0022581,EVM0006491,EVM0027069,EVM0004121,EVM0006466,EVM0002307,EVM0012493,EVM0017026,EVM0021760,EVM0022254,EVM0008219,EVM0001141,EVM0000574,EVM0005784,EVM0008699,EVM0018501,EVM0016249,EVM0013214,EVM0005260,EVM0003694,EVM0025660,EVM0027961,EVM0001437,EVM0003932,EVM0014574,EVM0014133,EVM0016557,EVM0014215,EVM0015862,EVM0013600,EVM0006087,EVM…	0
green	Biological process	regulation of cellular metabolic process	GO:0031323	5	0	4.63183	37	2275	39	11107	EVM0003343,EVM0006652,EVM0009844,EVM0002135,EVM0022581,EVM0006491,EVM0027069,EVM0004121,EVM0006466,EVM0002307,EVM0012493,EVM0017026,EVM0021760,EVM0022254,EVM0008219,EVM0001141,EVM0000574,EVM0005784,EVM0008699,EVM0016249,EVM0013214,EVM0005260,EVM0003694,EVM0025660,EVM0027961,EVM0001437,EVM0003932,EVM0014574,EVM0014133,EVM0016557,EVM0014215,EVM0015862,EVM0013600,EVM0006087,EVM0006560,EVM0023200,EVM…	0
green	Biological process	regulation of biosynthetic process	GO:0009889	5	0	5.52565	37	1907	39	11107	EVM0003343,EVM0006652,EVM0009844,EVM0002135,EVM0022581,EVM0006491,EVM0027069,EVM0004121,EVM0006466,EVM0002307,EVM0012493,EVM0017026,EVM0021760,EVM0022254,EVM0008219,EVM0001141,EVM0000574,EVM0005784,EVM0008699,EVM0016249,EVM0013214,EVM0005260,EVM0003694,EVM0025660,EVM0027961,EVM0001437,EVM0003932,EVM0014574,EVM0014133,EVM0016557,EVM0014215,EVM0015862,EVM0013600,EVM0006087,EVM0006560,EVM0023200,EVM…	0
green	Biological process	RNA metabolic process	GO:0016070	7	0	3.73824	38	2895	39	11107	EVM0003343,EVM0006652,EVM0009844,EVM0002135,EVM0022664,EVM0022581,EVM0006491,EVM0027069,EVM0004121,EVM0006466,EVM0002307,EVM0012493,EVM0017026,EVM0021760,EVM0022254,EVM0008219,EVM0001141,EVM0000574,EVM0005784,EVM0008699,EVM0016249,EVM0013214,EVM0005260,EVM0003694,EVM0025660,EVM0027961,EVM0001437,EVM0003932,EVM0014574,EVM0014133,EVM0016557,EVM0014215,EVM0015862,EVM0013600,EVM0006087,EVM0006560,EVM…	0
green	Biological process	heterocycle biosynthetic process	GO:0018130	5	0	4.99871	38	2165	39	11107	EVM0003343,EVM0006652,EVM0009844,EVM0002135,EVM0022664,EVM0022581,EVM0006491,EVM0027069,EVM0004121,EVM0006466,EVM0002307,EVM0012493,EVM0017026,EVM0021760,EVM0022254,EVM0008219,EVM0001141,EVM0000574,EVM0005784,EVM0008699,EVM0016249,EVM0013214,EVM0005260,EVM0003694,EVM0025660,EVM0027961,EVM0001437,EVM0003932,EVM0014574,EVM0014133,EVM0016557,EVM0014215,EVM0015862,EVM0013600,EVM0006087,EVM0006560,EVM…	0
green	Biological process	regulation of nucleobase-containing compound metabolic process	GO:0019219	6	0	5.75186	37	1832	39	11107	EVM0003343,EVM0006652,EVM0009844,EVM0002135,EVM0022581,EVM0006491,EVM0027069,EVM0004121,EVM0006466,EVM0002307,EVM0012493,EVM0017026,EVM0021760,EVM0022254,EVM0008219,EVM0001141,EVM0000574,EVM0005784,EVM0008699,EVM0016249,EVM0013214,EVM0005260,EVM0003694,EVM0025660,EVM0027961,EVM0001437,EVM0003932,EVM0014574,EVM0014133,EVM0016557,EVM0014215,EVM0015862,EVM0013600,EVM0006087,EVM0006560,EVM0023200,EVM…	0
green	Biological process	regulation of metabolic process	GO:0019222	4	0	4.18151	37	2520	39	11107	EVM0003343,EVM0006652,EVM0009844,EVM0002135,EVM0022581,EVM0006491,EVM0027069,EVM0004121,EVM0006466,EVM0002307,EVM0012493,EVM0017026,EVM0021760,EVM0022254,EVM0008219,EVM0001141,EVM0000574,EVM0005784,EVM0008699,EVM0016249,EVM0013214,EVM0005260,EVM0003694,EVM0025660,EVM0027961,EVM0001437,EVM0003932,EVM0014574,EVM0014133,EVM0016557,EVM0014215,EVM0015862,EVM0013600,EVM0006087,EVM0006560,EVM0023200,EVM…	0
green	Biological process	organic cyclic compound biosynthetic process	GO:1901362	5	0	4.62487	38	2340	39	11107	EVM0003343,EVM0006652,EVM0009844,EVM0002135,EVM0022664,EVM0022581,EVM0006491,EVM0027069,EVM0004121,EVM0006466,EVM0002307,EVM0012493,EVM0017026,EVM0021760,EVM0022254,EVM0008219,EVM0001141,EVM0000574,EVM0005784,EVM0008699,EVM0016249,EVM0013214,EVM0005260,EVM0003694,EVM0025660,EVM0027961,EVM0001437,EVM0003932,EVM0014574,EVM0014133,EVM0016557,EVM0014215,EVM0015862,EVM0013600,EVM0006087,EVM0006560,EVM…	0
green	Biological process	cellular nitrogen compound metabolic process	GO:0034641	4	0	2.71432	39	4092	39	11107	EVM0003343,EVM0006652,EVM0009844,EVM0002135,EVM0022664,EVM0022581,EVM0006491,EVM0027069,EVM0004121,EVM0006466,EVM0002307,EVM0012493,EVM0017026,EVM0021760,EVM0022254,EVM0008219,EVM0001141,EVM0000574,EVM0005784,EVM0008699,EVM0018501,EVM0016249,EVM0013214,EVM0005260,EVM0003694,EVM0025660,EVM0027961,EVM0001437,EVM0003932,EVM0014574,EVM0014133,EVM0016557,EVM0014215,EVM0015862,EVM0013600,EVM0006087,EVM…	0
green	Biological process	cellular macromolecule biosynthetic process	GO:0034645	6	0	4.04374	35	2465	39	11107	EVM0003343,EVM0002135,EVM0022664,EVM0022581,EVM0006491,EVM0027069,EVM0004121,EVM0006466,EVM0002307,EVM0012493,EVM0017026,EVM0021760,EVM0022254,EVM0008219,EVM0001141,EVM0000574,EVM0005784,EVM0008699,EVM0016249,EVM0013214,EVM0005260,EVM0003694,EVM0025660,EVM0027961,EVM0001437,EVM0003932,EVM0014574,EVM0016557,EVM0014215,EVM0015862,EVM0013600,EVM0006087,EVM0006560,EVM0023200,EVM0012756,	0
green	Biological process	regulation of macromolecule metabolic process	GO:0060255	5	0	4.57154	37	2305	39	11107	EVM0003343,EVM0006652,EVM0009844,EVM0002135,EVM0022581,EVM0006491,EVM0027069,EVM0004121,EVM0006466,EVM0002307,EVM0012493,EVM0017026,EVM0021760,EVM0022254,EVM0008219,EVM0001141,EVM0000574,EVM0005784,EVM0008699,EVM0016249,EVM0013214,EVM0005260,EVM0003694,EVM0025660,EVM0027961,EVM0001437,EVM0003932,EVM0014574,EVM0014133,EVM0016557,EVM0014215,EVM0015862,EVM0013600,EVM0006087,EVM0006560,EVM0023200,EVM…	0
green	Biological process	biosynthetic process	GO:0009058	3	0	2.87214	38	3768	39	11107	EVM0003343,EVM0006652,EVM0009844,EVM0002135,EVM0022664,EVM0022581,EVM0006491,EVM0027069,EVM0004121,EVM0006466,EVM0002307,EVM0012493,EVM0017026,EVM0021760,EVM0022254,EVM0008219,EVM0001141,EVM0000574,EVM0005784,EVM0008699,EVM0016249,EVM0013214,EVM0005260,EVM0003694,EVM0025660,EVM0027961,EVM0001437,EVM0003932,EVM0014574,EVM0014133,EVM0016557,EVM0014215,EVM0015862,EVM0013600,EVM0006087,EVM0006560,EVM…	0
green	Biological process	macromolecule biosynthetic process	GO:0009059	5	0	4.23736	38	2554	39	11107	EVM0003343,EVM0006652,EVM0009844,EVM0002135,EVM0022664,EVM0022581,EVM0006491,EVM0027069,EVM0004121,EVM0006466,EVM0002307,EVM0012493,EVM0017026,EVM0021760,EVM0022254,EVM0008219,EVM0001141,EVM0000574,EVM0005784,EVM0008699,EVM0016249,EVM0013214,EVM0005260,EVM0003694,EVM0025660,EVM0027961,EVM0001437,EVM0003932,EVM0014574,EVM0014133,EVM0016557,EVM0014215,EVM0015862,EVM0013600,EVM0006087,EVM0006560,EVM…	0
green	Biological process	regulation of nucleic acid-templated transcription	GO:1903506	9	0	6.51664	37	1617	39	11107	EVM0003343,EVM0006652,EVM0009844,EVM0002135,EVM0022581,EVM0006491,EVM0027069,EVM0004121,EVM0006466,EVM0002307,EVM0012493,EVM0017026,EVM0021760,EVM0022254,EVM0008219,EVM0001141,EVM0000574,EVM0005784,EVM0008699,EVM0016249,EVM0013214,EVM0005260,EVM0003694,EVM0025660,EVM0027961,EVM0001437,EVM0003932,EVM0014574,EVM0014133,EVM0016557,EVM0014215,EVM0015862,EVM0013600,EVM0006087,EVM0006560,EVM0023200,EVM…	0
green	Biological process	regulation of nitrogen compound metabolic process	GO:0051171	5	0	4.88522	37	2157	39	11107	EVM0003343,EVM0006652,EVM0009844,EVM0002135,EVM0022581,EVM0006491,EVM0027069,EVM0004121,EVM0006466,EVM0002307,EVM0012493,EVM0017026,EVM0021760,EVM0022254,EVM0008219,EVM0001141,EVM0000574,EVM0005784,EVM0008699,EVM0016249,EVM0013214,EVM0005260,EVM0003694,EVM0025660,EVM0027961,EVM0001437,EVM0003932,EVM0014574,EVM0014133,EVM0016557,EVM0014215,EVM0015862,EVM0013600,EVM0006087,EVM0006560,EVM0023200,EVM…	0
green	Biological process	nucleobase-containing compound metabolic process	GO:0006139	5	0	3.13757	39	3540	39	11107	EVM0003343,EVM0006652,EVM0009844,EVM0002135,EVM0022664,EVM0022581,EVM0006491,EVM0027069,EVM0004121,EVM0006466,EVM0002307,EVM0012493,EVM0017026,EVM0021760,EVM0022254,EVM0008219,EVM0001141,EVM0000574,EVM0005784,EVM0008699,EVM0018501,EVM0016249,EVM0013214,EVM0005260,EVM0003694,EVM0025660,EVM0027961,EVM0001437,EVM0003932,EVM0014574,EVM0014133,EVM0016557,EVM0014215,EVM0015862,EVM0013600,EVM0006087,EVM…	0
green	Biological process	regulation of cellular biosynthetic process	GO:0031326	6	1.11e-16	5.64101	37	1868	39	11107	EVM0003343,EVM0006652,EVM0009844,EVM0002135,EVM0022581,EVM0006491,EVM0027069,EVM0004121,EVM0006466,EVM0002307,EVM0012493,EVM0017026,EVM0021760,EVM0022254,EVM0008219,EVM0001141,EVM0000574,EVM0005784,EVM0008699,EVM0016249,EVM0013214,EVM0005260,EVM0003694,EVM0025660,EVM0027961,EVM0001437,EVM0003932,EVM0014574,EVM0014133,EVM0016557,EVM0014215,EVM0015862,EVM0013600,EVM0006087,EVM0006560,EVM0023200,EVM…	1.74e-15
green	Biological process	organic cyclic compound metabolic process	GO:1901360	4	1.11e-16	2.76294	39	4020	39	11107	EVM0003343,EVM0006652,EVM0009844,EVM0002135,EVM0022664,EVM0022581,EVM0006491,EVM0027069,EVM0004121,EVM0006466,EVM0002307,EVM0012493,EVM0017026,EVM0021760,EVM0022254,EVM0008219,EVM0001141,EVM0000574,EVM0005784,EVM0008699,EVM0018501,EVM0016249,EVM0013214,EVM0005260,EVM0003694,EVM0025660,EVM0027961,EVM0001437,EVM0003932,EVM0014574,EVM0014133,EVM0016557,EVM0014215,EVM0015862,EVM0013600,EVM0006087,EVM…	1.74e-15
green	Biological process	aromatic compound biosynthetic process	GO:0019438	5	1.11e-16	4.82488	38	2243	39	11107	EVM0003343,EVM0006652,EVM0009844,EVM0002135,EVM0022664,EVM0022581,EVM0006491,EVM0027069,EVM0004121,EVM0006466,EVM0002307,EVM0012493,EVM0017026,EVM0021760,EVM0022254,EVM0008219,EVM0001141,EVM0000574,EVM0005784,EVM0008699,EVM0016249,EVM0013214,EVM0005260,EVM0003694,EVM0025660,EVM0027961,EVM0001437,EVM0003932,EVM0014574,EVM0014133,EVM0016557,EVM0014215,EVM0015862,EVM0013600,EVM0006087,EVM0006560,EVM…	1.74e-15
green	Biological process	heterocycle metabolic process	GO:0046483	4	2.22e-16	2.92829	39	3793	39	11107	EVM0003343,EVM0006652,EVM0009844,EVM0002135,EVM0022664,EVM0022581,EVM0006491,EVM0027069,EVM0004121,EVM0006466,EVM0002307,EVM0012493,EVM0017026,EVM0021760,EVM0022254,EVM0008219,EVM0001141,EVM0000574,EVM0005784,EVM0008699,EVM0018501,EVM0016249,EVM0013214,EVM0005260,EVM0003694,EVM0025660,EVM0027961,EVM0001437,EVM0003932,EVM0014574,EVM0014133,EVM0016557,EVM0014215,EVM0015862,EVM0013600,EVM0006087,EVM…	3.18e-15
green	Biological process	nucleobase-containing compound biosynthetic process	GO:0034654	6	4.44e-16	5.51872	38	1961	39	11107	EVM0003343,EVM0006652,EVM0009844,EVM0002135,EVM0022664,EVM0022581,EVM0006491,EVM0027069,EVM0004121,EVM0006466,EVM0002307,EVM0012493,EVM0017026,EVM0021760,EVM0022254,EVM0008219,EVM0001141,EVM0000574,EVM0005784,EVM0008699,EVM0016249,EVM0013214,EVM0005260,EVM0003694,EVM0025660,EVM0027961,EVM0001437,EVM0003932,EVM0014574,EVM0014133,EVM0016557,EVM0014215,EVM0015862,EVM0013600,EVM0006087,EVM0006560,EVM…	6.18e-15
green	Biological process	organic substance biosynthetic process	GO:1901576	4	6.66e-16	2.97068	38	3643	39	11107	EVM0003343,EVM0006652,EVM0009844,EVM0002135,EVM0022664,EVM0022581,EVM0006491,EVM0027069,EVM0004121,EVM0006466,EVM0002307,EVM0012493,EVM0017026,EVM0021760,EVM0022254,EVM0008219,EVM0001141,EVM0000574,EVM0005784,EVM0008699,EVM0016249,EVM0013214,EVM0005260,EVM0003694,EVM0025660,EVM0027961,EVM0001437,EVM0003932,EVM0014574,EVM0014133,EVM0016557,EVM0014215,EVM0015862,EVM0013600,EVM0006087,EVM0006560,EVM…	9.01e-15
green	Biological process	regulation of cellular process	GO:0050794	4	7.88e-15	2.65694	37	3966	39	11107	EVM0003343,EVM0006652,EVM0009844,EVM0002135,EVM0022581,EVM0006491,EVM0027069,EVM0004121,EVM0006466,EVM0002307,EVM0012493,EVM0017026,EVM0021760,EVM0022254,EVM0008219,EVM0001141,EVM0000574,EVM0005784,EVM0008699,EVM0016249,EVM0013214,EVM0005260,EVM0003694,EVM0025660,EVM0027961,EVM0001437,EVM0003932,EVM0014574,EVM0014133,EVM0016557,EVM0014215,EVM0015862,EVM0013600,EVM0006087,EVM0006560,EVM0023200,EVM…	1.04e-13
green	Biological process	regulation of biological process	GO:0050789	3	1.11e-14	2.46015	38	4399	39	11107	EVM0003343,EVM0006652,EVM0009844,EVM0002135,EVM0022664,EVM0022581,EVM0006491,EVM0027069,EVM0004121,EVM0006466,EVM0002307,EVM0012493,EVM0017026,EVM0021760,EVM0022254,EVM0008219,EVM0001141,EVM0000574,EVM0005784,EVM0008699,EVM0016249,EVM0013214,EVM0005260,EVM0003694,EVM0025660,EVM0027961,EVM0001437,EVM0003932,EVM0014574,EVM0014133,EVM0016557,EVM0014215,EVM0015862,EVM0013600,EVM0006087,EVM0006560,EVM…	1.42e-13
green	Biological process	biological regulation	GO:0065007	2	1.52e-14	2.25569	39	4924	39	11107	EVM0003343,EVM0006652,EVM0009844,EVM0002135,EVM0022664,EVM0022581,EVM0006491,EVM0027069,EVM0004121,EVM0006466,EVM0002307,EVM0012493,EVM0017026,EVM0021760,EVM0022254,EVM0008219,EVM0001141,EVM0000574,EVM0005784,EVM0008699,EVM0018501,EVM0016249,EVM0013214,EVM0005260,EVM0003694,EVM0025660,EVM0027961,EVM0001437,EVM0003932,EVM0014574,EVM0014133,EVM0016557,EVM0014215,EVM0015862,EVM0013600,EVM0006087,EVM…	1.9e-13
green	Biological process	macromolecule metabolic process	GO:0043170	4	2.37e-12	1.98304	39	5601	39	11107	EVM0003343,EVM0006652,EVM0009844,EVM0002135,EVM0022664,EVM0022581,EVM0006491,EVM0027069,EVM0004121,EVM0006466,EVM0002307,EVM0012493,EVM0017026,EVM0021760,EVM0022254,EVM0008219,EVM0001141,EVM0000574,EVM0005784,EVM0008699,EVM0018501,EVM0016249,EVM0013214,EVM0005260,EVM0003694,EVM0025660,EVM0027961,EVM0001437,EVM0003932,EVM0014574,EVM0014133,EVM0016557,EVM0014215,EVM0015862,EVM0013600,EVM0006087,EVM…	2.89e-11
green	Biological process	cellular macromolecule metabolic process	GO:0044260	5	5.34e-12	2.34399	36	4374	39	11107	EVM0003343,EVM0002135,EVM0022664,EVM0022581,EVM0006491,EVM0027069,EVM0004121,EVM0006466,EVM0002307,EVM0012493,EVM0017026,EVM0021760,EVM0022254,EVM0008219,EVM0001141,EVM0000574,EVM0005784,EVM0008699,EVM0018501,EVM0016249,EVM0013214,EVM0005260,EVM0003694,EVM0025660,EVM0027961,EVM0001437,EVM0003932,EVM0014574,EVM0016557,EVM0014215,EVM0015862,EVM0013600,EVM0006087,EVM0006560,EVM0023200,EVM0012756,	6.35e-11
green	Biological process	nitrogen compound metabolic process	GO:0006807	3	3.77e-11	1.84778	39	6011	39	11107	EVM0003343,EVM0006652,EVM0009844,EVM0002135,EVM0022664,EVM0022581,EVM0006491,EVM0027069,EVM0004121,EVM0006466,EVM0002307,EVM0012493,EVM0017026,EVM0021760,EVM0022254,EVM0008219,EVM0001141,EVM0000574,EVM0005784,EVM0008699,EVM0018501,EVM0016249,EVM0013214,EVM0005260,EVM0003694,EVM0025660,EVM0027961,EVM0001437,EVM0003932,EVM0014574,EVM0014133,EVM0016557,EVM0014215,EVM0015862,EVM0013600,EVM0006087,EVM…	4.37e-10
green	Biological process	primary metabolic process	GO:0044238	3	1.98e-09	1.66972	39	6652	39	11107	EVM0003343,EVM0006652,EVM0009844,EVM0002135,EVM0022664,EVM0022581,EVM0006491,EVM0027069,EVM0004121,EVM0006466,EVM0002307,EVM0012493,EVM0017026,EVM0021760,EVM0022254,EVM0008219,EVM0001141,EVM0000574,EVM0005784,EVM0008699,EVM0018501,EVM0016249,EVM0013214,EVM0005260,EVM0003694,EVM0025660,EVM0027961,EVM0001437,EVM0003932,EVM0014574,EVM0014133,EVM0016557,EVM0014215,EVM0015862,EVM0013600,EVM0006087,EVM…	2.25e-08
green	Biological process	cellular metabolic process	GO:0044237	3	2.17e-08	1.57056	39	7072	39	11107	EVM0003343,EVM0006652,EVM0009844,EVM0002135,EVM0022664,EVM0022581,EVM0006491,EVM0027069,EVM0004121,EVM0006466,EVM0002307,EVM0012493,EVM0017026,EVM0021760,EVM0022254,EVM0008219,EVM0001141,EVM0000574,EVM0005784,EVM0008699,EVM0018501,EVM0016249,EVM0013214,EVM0005260,EVM0003694,EVM0025660,EVM0027961,EVM0001437,EVM0003932,EVM0014574,EVM0014133,EVM0016557,EVM0014215,EVM0015862,EVM0013600,EVM0006087,EVM…	2.41e-07
green	Biological process	organic substance metabolic process	GO:0071704	3	2.19e-08	1.57034	39	7073	39	11107	EVM0003343,EVM0006652,EVM0009844,EVM0002135,EVM0022664,EVM0022581,EVM0006491,EVM0027069,EVM0004121,EVM0006466,EVM0002307,EVM0012493,EVM0017026,EVM0021760,EVM0022254,EVM0008219,EVM0001141,EVM0000574,EVM0005784,EVM0008699,EVM0018501,EVM0016249,EVM0013214,EVM0005260,EVM0003694,EVM0025660,EVM0027961,EVM0001437,EVM0003932,EVM0014574,EVM0014133,EVM0016557,EVM0014215,EVM0015862,EVM0013600,EVM0006087,EVM…	2.37e-07
green	Biological process	response to jasmonic acid	GO:0009753	7	3.81e-08	12.0336	9	213	39	11107	EVM0006652,EVM0009844,EVM0022581,EVM0025660,EVM0027961,EVM0014133,EVM0013600,EVM0006087,EVM0006560,	4.04e-07
green	Biological process	response to fatty acid	GO:0070542	6	3.97e-08	11.9774	9	214	39	11107	EVM0006652,EVM0009844,EVM0022581,EVM0025660,EVM0027961,EVM0014133,EVM0013600,EVM0006087,EVM0006560,	4.11e-07
green	Biological process	jasmonic acid mediated signaling pathway	GO:0009867	7	8.04e-08	18.4589	7	108	39	11107	EVM0006652,EVM0009844,EVM0022581,EVM0025660,EVM0014133,EVM0006087,EVM0006560,	8.16e-07
green	Biological process	cellular response to jasmonic acid stimulus	GO:0071395	8	1.03e-07	17.7997	7	112	39	11107	EVM0006652,EVM0009844,EVM0022581,EVM0025660,EVM0014133,EVM0006087,EVM0006560,	1.03e-06
green	Biological process	cellular response to fatty acid	GO:0071398	7	1.1e-07	17.6422	7	113	39	11107	EVM0006652,EVM0009844,EVM0022581,EVM0025660,EVM0014133,EVM0006087,EVM0006560,	1.07e-06
green	Biological process	metabolic process	GO:0008152	2	7.12e-07	1.4365	39	7732	39	11107	EVM0003343,EVM0006652,EVM0009844,EVM0002135,EVM0022664,EVM0022581,EVM0006491,EVM0027069,EVM0004121,EVM0006466,EVM0002307,EVM0012493,EVM0017026,EVM0021760,EVM0022254,EVM0008219,EVM0001141,EVM0000574,EVM0005784,EVM0008699,EVM0018501,EVM0016249,EVM0013214,EVM0005260,EVM0003694,EVM0025660,EVM0027961,EVM0001437,EVM0003932,EVM0014574,EVM0014133,EVM0016557,EVM0014215,EVM0015862,EVM0013600,EVM0006087,EVM…	6.8e-06
green	Biological process	response to lipid	GO:0033993	5	6.78e-06	4.10458	13	902	39	11107	EVM0003343,EVM0006652,EVM0009844,EVM0002135,EVM0022581,EVM0001141,EVM0025660,EVM0027961,EVM0014133,EVM0014215,EVM0013600,EVM0006087,EVM0006560,	6.35e-05
green	Biological process	response to acid chemical	GO:0001101	4	8.73e-06	3.70551	14	1076	39	11107	EVM0003343,EVM0006652,EVM0009844,EVM0002135,EVM0022581,EVM0008219,EVM0001141,EVM0008699,EVM0025660,EVM0027961,EVM0014215,EVM0013600,EVM0006087,EVM0006560,	7.87e-05
green	Biological process	response to oxygen-containing compound	GO:1901700	4	9.06e-06	3.04498	17	1590	39	11107	EVM0003343,EVM0006652,EVM0009844,EVM0002135,EVM0022581,EVM0006466,EVM0012493,EVM0008219,EVM0001141,EVM0008699,EVM0025660,EVM0027961,EVM0014133,EVM0014215,EVM0013600,EVM0006087,EVM0006560,	8.02e-05
green	Biological process	hormone-mediated signaling pathway	GO:0009755	6	1.22e-05	4.68974	11	668	39	11107	EVM0006652,EVM0009844,EVM0022581,EVM0001141,EVM0025660,EVM0001437,EVM0014133,EVM0013600,EVM0006087,EVM0006560,EVM0012756,	0.000106044
green	Biological process	shoot system development	GO:0048367	5	2.16e-05	4.0112	12	852	39	11107	EVM0002135,EVM0022664,EVM0022581,EVM0021760,EVM0003694,EVM0025660,EVM0001437,EVM0003932,EVM0014574,EVM0015862,EVM0013600,EVM0012756,	0.000184461
green	Biological process	response to hormone	GO:0009725	5	2.41e-05	2.99194	16	1523	39	11107	EVM0003343,EVM0006652,EVM0009844,EVM0002135,EVM0022581,EVM0001141,EVM0005784,EVM0025660,EVM0027961,EVM0001437,EVM0014133,EVM0014215,EVM0013600,EVM0006087,EVM0006560,EVM0012756,	0.000202104
green	Biological process	response to organic substance	GO:0010033	4	3.01e-05	2.652	18	1933	39	11107	EVM0003343,EVM0006652,EVM0009844,EVM0002135,EVM0022581,EVM0006466,EVM0012493,EVM0001141,EVM0005784,EVM0025660,EVM0027961,EVM0001437,EVM0014133,EVM0014215,EVM0013600,EVM0006087,EVM0006560,EVM0012756,	0.000248062
green	Biological process	response to endogenous stimulus	GO:0009719	3	3.54e-05	2.90237	16	1570	39	11107	EVM0003343,EVM0006652,EVM0009844,EVM0002135,EVM0022581,EVM0001141,EVM0005784,EVM0025660,EVM0027961,EVM0001437,EVM0014133,EVM0014215,EVM0013600,EVM0006087,EVM0006560,EVM0012756,	0.000287046
green	Biological process	cellular response to hormone stimulus	GO:0032870	6	5.17e-05	4.01634	11	780	39	11107	EVM0006652,EVM0009844,EVM0022581,EVM0001141,EVM0025660,EVM0001437,EVM0014133,EVM0013600,EVM0006087,EVM0006560,EVM0012756,	0.000413056
green	Biological process	regulation of developmental process	GO:0050793	4	5.88e-05	3.96048	11	791	39	11107	EVM0002135,EVM0022664,EVM0021760,EVM0001141,EVM0025660,EVM0001437,EVM0003932,EVM0014574,EVM0015862,EVM0013600,EVM0012756,	0.000461999
green	Biological process	positive regulation of RNA metabolic process	GO:0051254	8	5.97e-05	4.93864	9	519	39	11107	EVM0022581,EVM0012493,EVM0021760,EVM0008219,EVM0001141,EVM0000574,EVM0008699,EVM0003932,EVM0014574,	0.000461753
green	Biological process	response to ethylene	GO:0009723	6	6.11e-05	8.58678	6	199	39	11107	EVM0025660,EVM0027961,EVM0001437,EVM0013600,EVM0006087,EVM0012756,	0.000465238
green	Biological process	positive regulation of gene expression	GO:0010628	7	7.24e-05	4.81796	9	532	39	11107	EVM0012493,EVM0021760,EVM0008219,EVM0001141,EVM0000574,EVM0008699,EVM0025660,EVM0003932,EVM0014574,	0.000542172
green	Biological process	meristem development	GO:0048507	5	8.45e-05	6.47261	7	308	39	11107	EVM0021760,EVM0001141,EVM0003694,EVM0001437,EVM0003932,EVM0015862,EVM0012756,	0.000623184
green	Biological process	cellular response to organic substance	GO:0071310	5	9.14e-05	3.46606	12	986	39	11107	EVM0006652,EVM0009844,EVM0022581,EVM0012493,EVM0001141,EVM0025660,EVM0001437,EVM0014133,EVM0013600,EVM0006087,EVM0006560,EVM0012756,	0.000664059
green	Biological process	cellular response to endogenous stimulus	GO:0071495	4	9.41e-05	3.7608	11	833	39	11107	EVM0006652,EVM0009844,EVM0022581,EVM0001141,EVM0025660,EVM0001437,EVM0014133,EVM0013600,EVM0006087,EVM0006560,EVM0012756,	0.000674081
green	Biological process	positive regulation of DNA-templated transcription	GO:0045893	11	9.94e-05	5.31086	8	429	39	11107	EVM0012493,EVM0021760,EVM0008219,EVM0001141,EVM0000574,EVM0008699,EVM0003932,EVM0014574,	0.000701644
green	Biological process	positive regulation of nucleobase-containing compound metabolic process	GO:0045935	7	0.000104495	4.59347	9	558	39	11107	EVM0022581,EVM0012493,EVM0021760,EVM0008219,EVM0001141,EVM0000574,EVM0008699,EVM0003932,EVM0014574,	0.000726986
green	Biological process	regulation of meristem development	GO:0048509	5	0.000116791	10.2444	5	139	39	11107	EVM0021760,EVM0001141,EVM0001437,EVM0003932,EVM0012756,	0.000801085
green	Biological process	response to gibberellin	GO:0009739	6	0.000116791	10.2444	5	139	39	11107	EVM0002135,EVM0025660,EVM0027961,EVM0013600,EVM0006087,	0.000801085
green	Biological process	positive regulation of biological process	GO:0048518	4	0.000133808	2.90819	14	1371	39	11107	EVM0022664,EVM0022581,EVM0012493,EVM0021760,EVM0008219,EVM0001141,EVM0000574,EVM0008699,EVM0025660,EVM0001437,EVM0003932,EVM0014574,EVM0015862,EVM0006087,	0.000892665
green	Biological process	positive regulation of RNA biosynthetic process	GO:1902680	9	0.000140722	5.05179	8	451	39	11107	EVM0012493,EVM0021760,EVM0008219,EVM0001141,EVM0000574,EVM0008699,EVM0003932,EVM0014574,	0.000926101
green	Biological process	positive regulation of nucleic acid-templated transcription	GO:1903508	10	0.000140722	5.05179	8	451	39	11107	EVM0012493,EVM0021760,EVM0008219,EVM0001141,EVM0000574,EVM0008699,EVM0003932,EVM0014574,	0.000926101
green	Biological process	cellular response to lipid	GO:0071396	6	0.000201103	4.79655	8	475	39	11107	EVM0006652,EVM0009844,EVM0022581,EVM0001141,EVM0025660,EVM0014133,EVM0006087,EVM0006560,	0.00128865
green	Biological process	meristem maintenance	GO:0010073	3	0.000246225	8.73604	5	163	39	11107	EVM0003694,EVM0001437,EVM0003932,EVM0015862,EVM0012756,	0.00155729
green	Biological process	regulation of shoot system development	GO:0048831	5	0.000248742	6.64891	6	257	39	11107	EVM0022664,EVM0025660,EVM0001437,EVM0014574,EVM0015862,EVM0013600,	0.00155304
green	Biological process	positive regulation of macromolecule metabolic process	GO:0010604	6	0.000255776	3.67477	10	775	39	11107	EVM0022581,EVM0012493,EVM0021760,EVM0008219,EVM0001141,EVM0000574,EVM0008699,EVM0025660,EVM0003932,EVM0014574,	0.00157675
green	Biological process	positive regulation of macromolecule biosynthetic process	GO:0010557	7	0.00032627	4.46737	8	510	39	11107	EVM0012493,EVM0021760,EVM0008219,EVM0001141,EVM0000574,EVM0008699,EVM0003932,EVM0014574,	0.00198617
green	Biological process	regulation of post-embryonic development	GO:0048580	6	0.000362653	5.1117	7	390	39	11107	EVM0002135,EVM0022664,EVM0025660,EVM0001437,EVM0015862,EVM0013600,EVM0012756,	0.0021804
green	Biological process	positive regulation of cellular biosynthetic process	GO:0031328	7	0.000417382	4.30692	8	529	39	11107	EVM0012493,EVM0021760,EVM0008219,EVM0001141,EVM0000574,EVM0008699,EVM0003932,EVM0014574,	0.00247884
green	Biological process	positive regulation of biosynthetic process	GO:0009891	6	0.000561251	4.12	8	553	39	11107	EVM0012493,EVM0021760,EVM0008219,EVM0001141,EVM0000574,EVM0008699,EVM0003932,EVM0014574,	0.00329313
green	Biological process	positive regulation of metabolic process	GO:0009893	5	0.000562595	3.33093	10	855	39	11107	EVM0022581,EVM0012493,EVM0021760,EVM0008219,EVM0001141,EVM0000574,EVM0008699,EVM0025660,EVM0003932,EVM0014574,	0.00326171
green	Biological process	response to abscisic acid	GO:0009737	6	0.000647048	4.03249	8	565	39	11107	EVM0003343,EVM0002135,EVM0001141,EVM0025660,EVM0027961,EVM0014215,EVM0013600,EVM0006087,	0.0036641
green	Biological process	positive regulation of nitrogen compound metabolic process	GO:0051173	6	0.000678256	3.57483	9	717	39	11107	EVM0022581,EVM0012493,EVM0021760,EVM0008219,EVM0001141,EVM0000574,EVM0008699,EVM0003932,EVM0014574,	0.00379668
green	Biological process	regulation of reproductive process	GO:2000241	4	0.000734707	5.42466	6	315	39	11107	EVM0022664,EVM0025660,EVM0001437,EVM0015862,EVM0013600,EVM0012756,	0.00406593
green	Biological process	response to alcohol	GO:0097305	5	0.00076033	3.93499	8	579	39	11107	EVM0003343,EVM0002135,EVM0001141,EVM0025660,EVM0027961,EVM0014215,EVM0013600,EVM0006087,	0.00416046
green	Biological process	response to chemical	GO:0042221	3	0.000820398	1.93606	20	2942	39	11107	EVM0003343,EVM0006652,EVM0009844,EVM0002135,EVM0022581,EVM0006466,EVM0012493,EVM0008219,EVM0001141,EVM0005784,EVM0008699,EVM0025660,EVM0027961,EVM0001437,EVM0014133,EVM0014215,EVM0013600,EVM0006087,EVM0006560,EVM0012756,	0.00443927
green	Biological process	regulation of multicellular organismal development	GO:2000026	5	0.000831968	3.88136	8	587	39	11107	EVM0002135,EVM0022664,EVM0025660,EVM0001437,EVM0014574,EVM0015862,EVM0013600,EVM0012756,	0.0044524
green	Biological process	positive regulation of cellular metabolic process	GO:0031325	6	0.00098307	3.39491	9	755	39	11107	EVM0022581,EVM0012493,EVM0021760,EVM0008219,EVM0001141,EVM0000574,EVM0008699,EVM0003932,EVM0014574,	0.00520386
green	Biological process	reproductive shoot system development	GO:0090567	6	0.0011709	4.19698	7	475	39	11107	EVM0002135,EVM0022664,EVM0003694,EVM0001437,EVM0003932,EVM0015862,EVM0013600,	0.00613149
green	Biological process	negative regulation of macromolecule metabolic process	GO:0010605	6	0.00139939	3.58233	8	636	39	11107	EVM0003343,EVM0006652,EVM0009844,EVM0022581,EVM0013214,EVM0025660,EVM0014133,EVM0016557,	0.00709897
green	Biological process	reproductive system development	GO:0061458	5	0.00156667	2.71468	11	1154	39	11107	EVM0002135,EVM0022664,EVM0001141,EVM0003694,EVM0025660,EVM0001437,EVM0003932,EVM0014574,EVM0015862,EVM0013600,EVM0012756,	0.00786566
green	Biological process	reproductive structure development	GO:0048608	4	0.00156667	2.71468	11	1154	39	11107	EVM0002135,EVM0022664,EVM0001141,EVM0003694,EVM0025660,EVM0001437,EVM0003932,EVM0014574,EVM0015862,EVM0013600,EVM0012756,	0.00786566
green	Biological process	leaf development	GO:0048366	6	0.00173441	4.59347	6	372	39	11107	EVM0022581,EVM0021760,EVM0025660,EVM0001437,EVM0003932,EVM0012756,	0.00844657
green	Biological process	regulation of multicellular organismal process	GO:0051239	4	0.00196879	3.39547	8	671	39	11107	EVM0002135,EVM0022664,EVM0025660,EVM0001437,EVM0014574,EVM0015862,EVM0013600,EVM0012756,	0.00949306
green	Biological process	negative regulation of metabolic process	GO:0009892	5	0.00208267	3.36538	8	677	39	11107	EVM0003343,EVM0006652,EVM0009844,EVM0022581,EVM0013214,EVM0025660,EVM0014133,EVM0016557,	0.00984721
green	Biological process	phyllome development	GO:0048827	5	0.00231957	3.72629	7	535	39	11107	EVM0022581,EVM0021760,EVM0003694,EVM0025660,EVM0001437,EVM0003932,EVM0012756,	0.0107584
green	Biological process	cellular response to oxygen-containing compound	GO:1901701	5	0.00241217	3.28768	8	693	39	11107	EVM0006652,EVM0009844,EVM0022581,EVM0001141,EVM0025660,EVM0014133,EVM0006087,EVM0006560,	0.0110823
green	Biological process	positive regulation of cellular process	GO:0048522	5	0.00334015	2.63699	10	1080	39	11107	EVM0022581,EVM0012493,EVM0021760,EVM0008219,EVM0001141,EVM0000574,EVM0008699,EVM0003932,EVM0014574,EVM0006087,	0.0149234
green	Biological process	system development	GO:0048731	4	0.00346185	2.11519	14	1885	39	11107	EVM0002135,EVM0022664,EVM0022581,EVM0021760,EVM0001141,EVM0005784,EVM0003694,EVM0025660,EVM0001437,EVM0003932,EVM0014574,EVM0015862,EVM0013600,EVM0012756,	0.0153265
green	Biological process	tissue development	GO:0009888	4	0.0035942	3.08303	8	739	39	11107	EVM0021760,EVM0001141,EVM0003694,EVM0025660,EVM0001437,EVM0003932,EVM0015862,EVM0012756,	0.0157692
green	Biological process	response to antibiotic	GO:0046677	4	0.00427601	4.60833	5	309	39	11107	EVM0012493,EVM0025660,EVM0027961,EVM0013600,EVM0006087,	0.0184285
green	Biological process	cellular response to chemical stimulus	GO:0070887	4	0.00441298	2.25729	12	1514	39	11107	EVM0006652,EVM0009844,EVM0022581,EVM0012493,EVM0001141,EVM0025660,EVM0001437,EVM0014133,EVM0013600,EVM0006087,EVM0006560,EVM0012756,	0.0188519
green	Biological process	flower development	GO:0009908	7	0.00498454	3.71472	6	460	39	11107	EVM0022664,EVM0003694,EVM0001437,EVM0003932,EVM0015862,EVM0013600,	0.0211084
green	Biological process	developmental process involved in reproduction	GO:0003006	3	0.00593186	2.29337	11	1366	39	11107	EVM0002135,EVM0022664,EVM0001141,EVM0003694,EVM0025660,EVM0001437,EVM0003932,EVM0014574,EVM0015862,EVM0013600,EVM0012756,	0.0246907
green	Biological process	plant organ development	GO:0099402	4	0.00731442	2.52777	9	1014	39	11107	EVM0022581,EVM0021760,EVM0005784,EVM0003694,EVM0025660,EVM0001437,EVM0003932,EVM0014574,EVM0012756,	0.0289604
green	Biological process	cellular process	GO:0009987	2	0.00794137	1.13175	39	9814	39	11107	EVM0003343,EVM0006652,EVM0009844,EVM0002135,EVM0022664,EVM0022581,EVM0006491,EVM0027069,EVM0004121,EVM0006466,EVM0002307,EVM0012493,EVM0017026,EVM0021760,EVM0022254,EVM0008219,EVM0001141,EVM0000574,EVM0005784,EVM0008699,EVM0018501,EVM0016249,EVM0013214,EVM0005260,EVM0003694,EVM0025660,EVM0027961,EVM0001437,EVM0003932,EVM0014574,EVM0014133,EVM0016557,EVM0014215,EVM0015862,EVM0013600,EVM0006087,EVM…	0.0311891
green	Biological process	negative regulation of macromolecule biosynthetic process	GO:0010558	7	0.00856767	3.9013	5	365	39	11107	EVM0006652,EVM0009844,EVM0022581,EVM0013214,EVM0014133,	0.0333797
green	Biological process	negative regulation of cellular biosynthetic process	GO:0031327	7	0.0102051	3.73747	5	381	39	11107	EVM0006652,EVM0009844,EVM0022581,EVM0013214,EVM0014133,	0.0388273
green	Biological process	negative regulation of biosynthetic process	GO:0009890	6	0.0109853	3.67004	5	388	39	11107	EVM0006652,EVM0009844,EVM0022581,EVM0013214,EVM0014133,	0.0411527
green	Biological process	post-embryonic development	GO:0009791	3	0.0144071	2.03293	11	1541	39	11107	EVM0002135,EVM0022664,EVM0002307,EVM0001141,EVM0003694,EVM0025660,EVM0001437,EVM0003932,EVM0015862,EVM0013600,EVM0012756,	0.0497605
green	Biological process	plant organ morphogenesis	GO:1905392	4	0.014518	3.42302	5	416	39	11107	EVM0021760,EVM0003694,EVM0001437,EVM0003932,EVM0012756,	0.0497907
green	Biological process	multicellular organism development	GO:0007275	4	0.0146542	1.74721	15	2445	39	11107	EVM0002135,EVM0022664,EVM0022581,EVM0002307,EVM0021760,EVM0001141,EVM0005784,EVM0003694,EVM0025660,EVM0001437,EVM0003932,EVM0014574,EVM0015862,EVM0013600,EVM0012756,	0.0499064
green	Biological process	reproductive process	GO:0022414	2	0.0150843	2.01982	11	1551	39	11107	EVM0002135,EVM0022664,EVM0001141,EVM0003694,EVM0025660,EVM0001437,EVM0003932,EVM0014574,EVM0015862,EVM0013600,EVM0012756,	0.0510141
green	Biological process	reproduction	GO:0000003	2	0.0157145	2.00817	11	1560	39	11107	EVM0002135,EVM0022664,EVM0001141,EVM0003694,EVM0025660,EVM0001437,EVM0003932,EVM0014574,EVM0015862,EVM0013600,EVM0012756,	0.0527792
green	Biological process	developmental process	GO:0032502	2	0.0211926	1.59313	17	3039	39	11107	EVM0002135,EVM0022664,EVM0022581,EVM0002307,EVM0021760,EVM0001141,EVM0000574,EVM0005784,EVM0003694,EVM0025660,EVM0001437,EVM0003932,EVM0014574,EVM0015862,EVM0013600,EVM0006087,EVM0012756,	0.0657375
green	Biological process	fruit development	GO:0010154	5	0.0215879	2.70803	6	631	39	11107	EVM0003694,EVM0025660,EVM0001437,EVM0014574,EVM0015862,EVM0012756,	0.0665398
green	Biological process	negative regulation of biological process	GO:0048519	4	0.0227801	2.10267	9	1219	39	11107	EVM0003343,EVM0006652,EVM0009844,EVM0022581,EVM0001141,EVM0013214,EVM0025660,EVM0014133,EVM0016557,	0.0689062
green	Biological process	negative regulation of nitrogen compound metabolic process	GO:0051172	6	0.0243231	2.99784	5	475	39	11107	EVM0006652,EVM0009844,EVM0022581,EVM0013214,EVM0014133,	0.0726709
green	Biological process	regulation of signal transduction	GO:0009966	6	0.0255133	2.96045	5	481	39	11107	EVM0006652,EVM0009844,EVM0025660,EVM0014133,EVM0006087,	0.0757621
green	Biological process	signal transduction	GO:0007165	5	0.0274825	1.8515	11	1692	39	11107	EVM0006652,EVM0009844,EVM0022581,EVM0001141,EVM0025660,EVM0001437,EVM0014133,EVM0013600,EVM0006087,EVM0006560,EVM0012756,	0.0806263
green	Biological process	negative regulation of cellular metabolic process	GO:0031324	6	0.0284363	2.87672	5	495	39	11107	EVM0006652,EVM0009844,EVM0022581,EVM0013214,EVM0014133,	0.0829249
green	Biological process	negative regulation of gene expression	GO:0010629	7	0.0301995	2.83096	5	503	39	11107	EVM0003343,EVM0022581,EVM0013214,EVM0025660,EVM0016557,	0.0870246
green	Biological process	signaling	GO:0023052	2	0.0306551	1.82136	11	1720	39	11107	EVM0006652,EVM0009844,EVM0022581,EVM0001141,EVM0025660,EVM0001437,EVM0014133,EVM0013600,EVM0006087,EVM0006560,EVM0012756,	0.0867967
green	Biological process	regulation of signaling	GO:0023051	4	0.0313363	2.8031	5	508	39	11107	EVM0006652,EVM0009844,EVM0025660,EVM0014133,EVM0006087,	0.0877057
green	Biological process	regulation of cell communication	GO:0010646	5	0.0322652	2.7812	5	512	39	11107	EVM0006652,EVM0009844,EVM0025660,EVM0014133,EVM0006087,	0.0897895
green	Biological process	negative regulation of cellular process	GO:0048523	5	0.0339791	2.22994	7	894	39	11107	EVM0006652,EVM0009844,EVM0022581,EVM0001141,EVM0013214,EVM0025660,EVM0014133,	0.0934904
green	Biological process	multicellular organismal process	GO:0032501	2	0.0354045	1.5781	15	2707	39	11107	EVM0002135,EVM0022664,EVM0022581,EVM0002307,EVM0021760,EVM0001141,EVM0005784,EVM0003694,EVM0025660,EVM0001437,EVM0003932,EVM0014574,EVM0015862,EVM0013600,EVM0012756,	0.0937064
greenyellow	Molecular function	transcription regulator activity	GO:0140110	2	0	7.32109	60	1221	63	9386	EVM0001289,EVM0004436,EVM0003304,EVM0014083,EVM0021612,EVM0020446,EVM0006091,EVM0020445,EVM0010321,EVM0008750,EVM0011931,EVM0013836,EVM0013516,EVM0008230,EVM0025295,EVM0003473,EVM0004441,EVM0001696,EVM0024997,EVM0022806,EVM0002505,EVM0017785,EVM0016734,EVM0019808,EVM0014118,EVM0021563,EVM0014317,EVM0009495,EVM0027331,EVM0005221,EVM0006752,EVM0019432,EVM0006319,EVM0025639,EVM0017097,EVM0003407,EVM…	0
greenyellow	Molecular function	DNA binding	GO:0003677	5	0	5.55796	36	965	63	9386	EVM0001289,EVM0004436,EVM0003304,EVM0014083,EVM0006091,EVM0008750,EVM0010447,EVM0013836,EVM0013516,EVM0025295,EVM0004441,EVM0001696,EVM0024997,EVM0022806,EVM0002505,EVM0016734,EVM0019808,EVM0014118,EVM0009495,EVM0005221,EVM0006752,EVM0019432,EVM0006319,EVM0025639,EVM0009260,EVM0017014,EVM0012120,EVM0022005,EVM0013339,EVM0017736,EVM0011756,EVM0009143,EVM0022360,EVM0007410,EVM0018213,EVM0028055,	0
greenyellow	Molecular function	DNA-binding transcription factor activity	GO:0003700	3	0	7.80022	60	1146	63	9386	EVM0001289,EVM0004436,EVM0003304,EVM0014083,EVM0021612,EVM0020446,EVM0006091,EVM0020445,EVM0010321,EVM0008750,EVM0011931,EVM0013836,EVM0013516,EVM0008230,EVM0025295,EVM0003473,EVM0004441,EVM0001696,EVM0024997,EVM0022806,EVM0002505,EVM0017785,EVM0016734,EVM0019808,EVM0014118,EVM0021563,EVM0014317,EVM0009495,EVM0027331,EVM0005221,EVM0006752,EVM0019432,EVM0006319,EVM0025639,EVM0017097,EVM0003407,EVM…	0
greenyellow	Molecular function	sequence-specific DNA binding	GO:0043565	6	1.11e-16	6.91286	29	625	63	9386	EVM0004436,EVM0003304,EVM0006091,EVM0008750,EVM0013836,EVM0013516,EVM0025295,EVM0004441,EVM0001696,EVM0024997,EVM0022806,EVM0002505,EVM0016734,EVM0019808,EVM0014118,EVM0009495,EVM0005221,EVM0019432,EVM0006319,EVM0025639,EVM0009260,EVM0012120,EVM0013339,EVM0017736,EVM0011756,EVM0022360,EVM0007410,EVM0018213,EVM0028055,	1.22e-15
greenyellow	Molecular function	transcription cis-regulatory region binding	GO:0000976	8	3.1e-13	8.3997	19	337	63	9386	EVM0004436,EVM0003304,EVM0006091,EVM0008750,EVM0013516,EVM0004441,EVM0001696,EVM0024997,EVM0002505,EVM0014118,EVM0009495,EVM0005221,EVM0006319,EVM0009260,EVM0012120,EVM0013339,EVM0017736,EVM0022360,EVM0018213,	2.73e-12
greenyellow	Molecular function	transcription regulatory region nucleic acid binding	GO:0001067	5	3.1e-13	8.3997	19	337	63	9386	EVM0004436,EVM0003304,EVM0006091,EVM0008750,EVM0013516,EVM0004441,EVM0001696,EVM0024997,EVM0002505,EVM0014118,EVM0009495,EVM0005221,EVM0006319,EVM0009260,EVM0012120,EVM0013339,EVM0017736,EVM0022360,EVM0018213,	2.73e-12
greenyellow	Molecular function	sequence-specific double-stranded DNA binding	GO:1990837	7	1.5e-12	7.69212	19	368	63	9386	EVM0004436,EVM0003304,EVM0006091,EVM0008750,EVM0013516,EVM0004441,EVM0001696,EVM0024997,EVM0002505,EVM0014118,EVM0009495,EVM0005221,EVM0006319,EVM0009260,EVM0012120,EVM0013339,EVM0017736,EVM0022360,EVM0018213,	9.42e-12
greenyellow	Molecular function	double-stranded DNA binding	GO:0003690	6	6.36e-12	6.56318	20	454	63	9386	EVM0004436,EVM0003304,EVM0006091,EVM0008750,EVM0010447,EVM0013516,EVM0004441,EVM0001696,EVM0024997,EVM0002505,EVM0014118,EVM0009495,EVM0005221,EVM0006319,EVM0009260,EVM0012120,EVM0013339,EVM0017736,EVM0022360,EVM0018213,	3.5e-11
greenyellow	Molecular function	nucleic acid binding	GO:0003676	4	7.07e-11	2.714	38	2086	63	9386	EVM0001289,EVM0004436,EVM0003304,EVM0014083,EVM0006091,EVM0008750,EVM0010447,EVM0013836,EVM0013516,EVM0025295,EVM0004441,EVM0001696,EVM0024997,EVM0022806,EVM0002505,EVM0016734,EVM0019808,EVM0014118,EVM0013944,EVM0009495,EVM0005221,EVM0006752,EVM0019432,EVM0006319,EVM0025639,EVM0009260,EVM0017014,EVM0012120,EVM0022005,EVM0019710,EVM0013339,EVM0017736,EVM0011756,EVM0009143,EVM0022360,EVM0007410,EVM…	3.46e-10
greenyellow	Molecular function	heterocyclic compound binding	GO:1901363	3	6.63e-09	2.34136	38	2418	63	9386	EVM0001289,EVM0004436,EVM0003304,EVM0014083,EVM0006091,EVM0008750,EVM0010447,EVM0013836,EVM0013516,EVM0025295,EVM0004441,EVM0001696,EVM0024997,EVM0022806,EVM0002505,EVM0016734,EVM0019808,EVM0014118,EVM0013944,EVM0009495,EVM0005221,EVM0006752,EVM0019432,EVM0006319,EVM0025639,EVM0009260,EVM0017014,EVM0012120,EVM0022005,EVM0019710,EVM0013339,EVM0017736,EVM0011756,EVM0009143,EVM0022360,EVM0007410,EVM…	2.92e-08
greenyellow	Molecular function	organic cyclic compound binding	GO:0097159	3	7.32e-09	2.33363	38	2426	63	9386	EVM0001289,EVM0004436,EVM0003304,EVM0014083,EVM0006091,EVM0008750,EVM0010447,EVM0013836,EVM0013516,EVM0025295,EVM0004441,EVM0001696,EVM0024997,EVM0022806,EVM0002505,EVM0016734,EVM0019808,EVM0014118,EVM0013944,EVM0009495,EVM0005221,EVM0006752,EVM0019432,EVM0006319,EVM0025639,EVM0009260,EVM0017014,EVM0012120,EVM0022005,EVM0019710,EVM0013339,EVM0017736,EVM0011756,EVM0009143,EVM0022360,EVM0007410,EVM…	2.93e-08
greenyellow	Molecular function	DNA-binding transcription factor activity, RNA polymerase II-specific	GO:0000981	4	6.31e-05	6.90655	7	151	63	9386	EVM0004436,EVM0006091,EVM0008750,EVM0004441,EVM0001696,EVM0009495,EVM0006319,	0.000231546
greenyellow	Molecular function	binding	GO:0005488	2	0.00423632	1.37344	40	4339	63	9386	EVM0001289,EVM0004436,EVM0003304,EVM0014083,EVM0006091,EVM0010321,EVM0008750,EVM0010447,EVM0013836,EVM0013516,EVM0025295,EVM0004441,EVM0001696,EVM0024997,EVM0022806,EVM0002505,EVM0016734,EVM0019808,EVM0014118,EVM0013944,EVM0009495,EVM0005221,EVM0006752,EVM0019432,EVM0006319,EVM0025639,EVM0009260,EVM0017014,EVM0012120,EVM0022005,EVM0019710,EVM0013339,EVM0017736,EVM0011756,EVM0009143,EVM0022360,EVM…	0.00981043
greenyellow	Cellular component	nucleus	GO:0005634	6	0	3.0968	46	3448	48	11142	EVM0001289,EVM0004436,EVM0003304,EVM0021612,EVM0020446,EVM0006091,EVM0010321,EVM0008750,EVM0011931,EVM0010447,EVM0013836,EVM0008230,EVM0025295,EVM0003473,EVM0004441,EVM0001696,EVM0024997,EVM0022806,EVM0002505,EVM0014118,EVM0021563,EVM0014317,EVM0009495,EVM0007008,EVM0027331,EVM0006752,EVM0019432,EVM0006319,EVM0025639,EVM0003407,EVM0015033,EVM0012120,EVM0012521,EVM0022005,EVM0013339,EVM0017736,EVM…	0
greenyellow	Cellular component	intracellular membrane-bounded organelle	GO:0043231	5	1.26e-06	1.38327	47	7887	48	11142	EVM0001289,EVM0004436,EVM0003304,EVM0021612,EVM0020446,EVM0006091,EVM0010321,EVM0008750,EVM0011931,EVM0010447,EVM0013836,EVM0008230,EVM0025295,EVM0003473,EVM0004441,EVM0001696,EVM0024997,EVM0022806,EVM0002505,EVM0014118,EVM0021563,EVM0014317,EVM0009495,EVM0007008,EVM0027331,EVM0006752,EVM0019432,EVM0006319,EVM0025639,EVM0003407,EVM0015033,EVM0017014,EVM0012120,EVM0012521,EVM0022005,EVM0013339,EVM…	3.15e-05
greenyellow	Cellular component	membrane-bounded organelle	GO:0043227	4	1.5e-06	1.37786	47	7918	48	11142	EVM0001289,EVM0004436,EVM0003304,EVM0021612,EVM0020446,EVM0006091,EVM0010321,EVM0008750,EVM0011931,EVM0010447,EVM0013836,EVM0008230,EVM0025295,EVM0003473,EVM0004441,EVM0001696,EVM0024997,EVM0022806,EVM0002505,EVM0014118,EVM0021563,EVM0014317,EVM0009495,EVM0007008,EVM0027331,EVM0006752,EVM0019432,EVM0006319,EVM0025639,EVM0003407,EVM0015033,EVM0017014,EVM0012120,EVM0012521,EVM0022005,EVM0013339,EVM…	2.5e-05
greenyellow	Cellular component	intracellular organelle	GO:0043229	4	6.58e-06	1.33307	47	8184	48	11142	EVM0001289,EVM0004436,EVM0003304,EVM0021612,EVM0020446,EVM0006091,EVM0010321,EVM0008750,EVM0011931,EVM0010447,EVM0013836,EVM0008230,EVM0025295,EVM0003473,EVM0004441,EVM0001696,EVM0024997,EVM0022806,EVM0002505,EVM0014118,EVM0021563,EVM0014317,EVM0009495,EVM0007008,EVM0027331,EVM0006752,EVM0019432,EVM0006319,EVM0025639,EVM0003407,EVM0015033,EVM0017014,EVM0012120,EVM0012521,EVM0022005,EVM0013339,EVM…	8.22e-05
greenyellow	Cellular component	organelle	GO:0043226	3	7.54e-06	1.32901	47	8209	48	11142	EVM0001289,EVM0004436,EVM0003304,EVM0021612,EVM0020446,EVM0006091,EVM0010321,EVM0008750,EVM0011931,EVM0010447,EVM0013836,EVM0008230,EVM0025295,EVM0003473,EVM0004441,EVM0001696,EVM0024997,EVM0022806,EVM0002505,EVM0014118,EVM0021563,EVM0014317,EVM0009495,EVM0007008,EVM0027331,EVM0006752,EVM0019432,EVM0006319,EVM0025639,EVM0003407,EVM0015033,EVM0017014,EVM0012120,EVM0012521,EVM0022005,EVM0013339,EVM…	7.54e-05
greenyellow	Cellular component	obsolete intracellular part	GO:0044424	0	0.000147217	1.20129	48	9275	48	11142	EVM0001289,EVM0004436,EVM0003304,EVM0021612,EVM0020446,EVM0006091,EVM0010321,EVM0008750,EVM0011931,EVM0010447,EVM0013836,EVM0008230,EVM0025295,EVM0003473,EVM0004441,EVM0001696,EVM0024997,EVM0022806,EVM0002505,EVM0014118,EVM0021563,EVM0014317,EVM0009495,EVM0007008,EVM0027331,EVM0006752,EVM0019432,EVM0006319,EVM0025639,EVM0003407,EVM0015033,EVM0017014,EVM0012120,EVM0012521,EVM0022005,EVM0019710,EVM…	0.00122681
greenyellow	Cellular component	intracellular anatomical structure	GO:0005622	3	0.000177386	1.19665	48	9311	48	11142	EVM0001289,EVM0004436,EVM0003304,EVM0021612,EVM0020446,EVM0006091,EVM0010321,EVM0008750,EVM0011931,EVM0010447,EVM0013836,EVM0008230,EVM0025295,EVM0003473,EVM0004441,EVM0001696,EVM0024997,EVM0022806,EVM0002505,EVM0014118,EVM0021563,EVM0014317,EVM0009495,EVM0007008,EVM0027331,EVM0006752,EVM0019432,EVM0006319,EVM0025639,EVM0003407,EVM0015033,EVM0017014,EVM0012120,EVM0012521,EVM0022005,EVM0019710,EVM…	0.00126704
greenyellow	Biological process	RNA biosynthetic process	GO:0032774	8	0	6.30653	63	1707	65	11107	EVM0001289,EVM0004436,EVM0003304,EVM0014083,EVM0017631,EVM0021612,EVM0020446,EVM0006091,EVM0020445,EVM0010321,EVM0008750,EVM0011931,EVM0010447,EVM0013836,EVM0013516,EVM0008230,EVM0025295,EVM0003473,EVM0004441,EVM0001696,EVM0024997,EVM0022806,EVM0002505,EVM0017785,EVM0016734,EVM0019808,EVM0014118,EVM0021563,EVM0014317,EVM0009495,EVM0027331,EVM0005221,EVM0006752,EVM0019432,EVM0006319,EVM0025639,EVM…	0
greenyellow	Biological process	regulation of RNA metabolic process	GO:0051252	7	0	6.2155	63	1732	65	11107	EVM0001289,EVM0004436,EVM0003304,EVM0014083,EVM0017631,EVM0021612,EVM0020446,EVM0006091,EVM0020445,EVM0010321,EVM0008750,EVM0011931,EVM0010447,EVM0013836,EVM0013516,EVM0008230,EVM0025295,EVM0003473,EVM0004441,EVM0001696,EVM0024997,EVM0022806,EVM0002505,EVM0017785,EVM0016734,EVM0019808,EVM0014118,EVM0021563,EVM0014317,EVM0009495,EVM0027331,EVM0005221,EVM0006752,EVM0019432,EVM0006319,EVM0025639,EVM…	0
greenyellow	Biological process	macromolecule metabolic process	GO:0043170	4	0	1.95253	64	5601	65	11107	EVM0001289,EVM0004436,EVM0003304,EVM0014083,EVM0017631,EVM0021612,EVM0020446,EVM0006091,EVM0020445,EVM0010321,EVM0008750,EVM0011931,EVM0010447,EVM0013836,EVM0013516,EVM0008230,EVM0025295,EVM0003473,EVM0004441,EVM0001696,EVM0024997,EVM0022806,EVM0002505,EVM0017785,EVM0016734,EVM0019808,EVM0014118,EVM0021563,EVM0014317,EVM0009495,EVM0027331,EVM0005221,EVM0006752,EVM0019432,EVM0006319,EVM0025639,EVM…	0
greenyellow	Biological process	regulation of DNA-templated transcription	GO:0006355	10	0	6.77912	63	1588	65	11107	EVM0001289,EVM0004436,EVM0003304,EVM0014083,EVM0017631,EVM0021612,EVM0020446,EVM0006091,EVM0020445,EVM0010321,EVM0008750,EVM0011931,EVM0010447,EVM0013836,EVM0013516,EVM0008230,EVM0025295,EVM0003473,EVM0004441,EVM0001696,EVM0024997,EVM0022806,EVM0002505,EVM0017785,EVM0016734,EVM0019808,EVM0014118,EVM0021563,EVM0014317,EVM0009495,EVM0027331,EVM0005221,EVM0006752,EVM0019432,EVM0006319,EVM0025639,EVM…	0
greenyellow	Biological process	regulation of primary metabolic process	GO:0080090	5	0	4.88885	63	2202	65	11107	EVM0001289,EVM0004436,EVM0003304,EVM0014083,EVM0017631,EVM0021612,EVM0020446,EVM0006091,EVM0020445,EVM0010321,EVM0008750,EVM0011931,EVM0010447,EVM0013836,EVM0013516,EVM0008230,EVM0025295,EVM0003473,EVM0004441,EVM0001696,EVM0024997,EVM0022806,EVM0002505,EVM0017785,EVM0016734,EVM0019808,EVM0014118,EVM0021563,EVM0014317,EVM0009495,EVM0027331,EVM0005221,EVM0006752,EVM0019432,EVM0006319,EVM0025639,EVM…	0
greenyellow	Biological process	regulation of gene expression	GO:0010468	6	0	5.45628	63	1973	65	11107	EVM0001289,EVM0004436,EVM0003304,EVM0014083,EVM0017631,EVM0021612,EVM0020446,EVM0006091,EVM0020445,EVM0010321,EVM0008750,EVM0011931,EVM0010447,EVM0013836,EVM0013516,EVM0008230,EVM0025295,EVM0003473,EVM0004441,EVM0001696,EVM0024997,EVM0022806,EVM0002505,EVM0017785,EVM0016734,EVM0019808,EVM0014118,EVM0021563,EVM0014317,EVM0009495,EVM0027331,EVM0005221,EVM0006752,EVM0019432,EVM0006319,EVM0025639,EVM…	0
greenyellow	Biological process	regulation of cellular macromolecule biosynthetic process	GO:2000112	7	0	6.12706	63	1757	65	11107	EVM0001289,EVM0004436,EVM0003304,EVM0014083,EVM0017631,EVM0021612,EVM0020446,EVM0006091,EVM0020445,EVM0010321,EVM0008750,EVM0011931,EVM0010447,EVM0013836,EVM0013516,EVM0008230,EVM0025295,EVM0003473,EVM0004441,EVM0001696,EVM0024997,EVM0022806,EVM0002505,EVM0017785,EVM0016734,EVM0019808,EVM0014118,EVM0021563,EVM0014317,EVM0009495,EVM0027331,EVM0005221,EVM0006752,EVM0019432,EVM0006319,EVM0025639,EVM…	0
greenyellow	Biological process	biological regulation	GO:0065007	2	0	2.18628	63	4924	65	11107	EVM0001289,EVM0004436,EVM0003304,EVM0014083,EVM0017631,EVM0021612,EVM0020446,EVM0006091,EVM0020445,EVM0010321,EVM0008750,EVM0011931,EVM0010447,EVM0013836,EVM0013516,EVM0008230,EVM0025295,EVM0003473,EVM0004441,EVM0001696,EVM0024997,EVM0022806,EVM0002505,EVM0017785,EVM0016734,EVM0019808,EVM0014118,EVM0021563,EVM0014317,EVM0009495,EVM0027331,EVM0005221,EVM0006752,EVM0019432,EVM0006319,EVM0025639,EVM…	0
greenyellow	Biological process	cellular aromatic compound metabolic process	GO:0006725	4	0	2.79268	64	3916	65	11107	EVM0001289,EVM0004436,EVM0003304,EVM0014083,EVM0017631,EVM0021612,EVM0020446,EVM0006091,EVM0020445,EVM0010321,EVM0008750,EVM0011931,EVM0010447,EVM0013836,EVM0013516,EVM0008230,EVM0025295,EVM0003473,EVM0004441,EVM0001696,EVM0024997,EVM0022806,EVM0002505,EVM0017785,EVM0016734,EVM0019808,EVM0014118,EVM0021563,EVM0014317,EVM0009495,EVM0027331,EVM0005221,EVM0006752,EVM0019432,EVM0006319,EVM0025639,EVM…	0
greenyellow	Biological process	regulation of cellular metabolic process	GO:0031323	5	0	4.73198	63	2275	65	11107	EVM0001289,EVM0004436,EVM0003304,EVM0014083,EVM0017631,EVM0021612,EVM0020446,EVM0006091,EVM0020445,EVM0010321,EVM0008750,EVM0011931,EVM0010447,EVM0013836,EVM0013516,EVM0008230,EVM0025295,EVM0003473,EVM0004441,EVM0001696,EVM0024997,EVM0022806,EVM0002505,EVM0017785,EVM0016734,EVM0019808,EVM0014118,EVM0021563,EVM0014317,EVM0009495,EVM0027331,EVM0005221,EVM0006752,EVM0019432,EVM0006319,EVM0025639,EVM…	0
greenyellow	Biological process	regulation of cellular process	GO:0050794	4	0	2.71438	63	3966	65	11107	EVM0001289,EVM0004436,EVM0003304,EVM0014083,EVM0017631,EVM0021612,EVM0020446,EVM0006091,EVM0020445,EVM0010321,EVM0008750,EVM0011931,EVM0010447,EVM0013836,EVM0013516,EVM0008230,EVM0025295,EVM0003473,EVM0004441,EVM0001696,EVM0024997,EVM0022806,EVM0002505,EVM0017785,EVM0016734,EVM0019808,EVM0014118,EVM0021563,EVM0014317,EVM0009495,EVM0027331,EVM0005221,EVM0006752,EVM0019432,EVM0006319,EVM0025639,EVM…	0
greenyellow	Biological process	regulation of biosynthetic process	GO:0009889	5	0	5.64512	63	1907	65	11107	EVM0001289,EVM0004436,EVM0003304,EVM0014083,EVM0017631,EVM0021612,EVM0020446,EVM0006091,EVM0020445,EVM0010321,EVM0008750,EVM0011931,EVM0010447,EVM0013836,EVM0013516,EVM0008230,EVM0025295,EVM0003473,EVM0004441,EVM0001696,EVM0024997,EVM0022806,EVM0002505,EVM0017785,EVM0016734,EVM0019808,EVM0014118,EVM0021563,EVM0014317,EVM0009495,EVM0027331,EVM0005221,EVM0006752,EVM0019432,EVM0006319,EVM0025639,EVM…	0
greenyellow	Biological process	RNA metabolic process	GO:0016070	7	0	3.71857	63	2895	65	11107	EVM0001289,EVM0004436,EVM0003304,EVM0014083,EVM0017631,EVM0021612,EVM0020446,EVM0006091,EVM0020445,EVM0010321,EVM0008750,EVM0011931,EVM0010447,EVM0013836,EVM0013516,EVM0008230,EVM0025295,EVM0003473,EVM0004441,EVM0001696,EVM0024997,EVM0022806,EVM0002505,EVM0017785,EVM0016734,EVM0019808,EVM0014118,EVM0021563,EVM0014317,EVM0009495,EVM0027331,EVM0005221,EVM0006752,EVM0019432,EVM0006319,EVM0025639,EVM…	0
greenyellow	Biological process	regulation of nucleobase-containing compound metabolic process	GO:0019219	6	0	5.87623	63	1832	65	11107	EVM0001289,EVM0004436,EVM0003304,EVM0014083,EVM0017631,EVM0021612,EVM0020446,EVM0006091,EVM0020445,EVM0010321,EVM0008750,EVM0011931,EVM0010447,EVM0013836,EVM0013516,EVM0008230,EVM0025295,EVM0003473,EVM0004441,EVM0001696,EVM0024997,EVM0022806,EVM0002505,EVM0017785,EVM0016734,EVM0019808,EVM0014118,EVM0021563,EVM0014317,EVM0009495,EVM0027331,EVM0005221,EVM0006752,EVM0019432,EVM0006319,EVM0025639,EVM…	0
greenyellow	Biological process	organic cyclic compound biosynthetic process	GO:1901362	5	0	4.60053	63	2340	65	11107	EVM0001289,EVM0004436,EVM0003304,EVM0014083,EVM0017631,EVM0021612,EVM0020446,EVM0006091,EVM0020445,EVM0010321,EVM0008750,EVM0011931,EVM0010447,EVM0013836,EVM0013516,EVM0008230,EVM0025295,EVM0003473,EVM0004441,EVM0001696,EVM0024997,EVM0022806,EVM0002505,EVM0017785,EVM0016734,EVM0019808,EVM0014118,EVM0021563,EVM0014317,EVM0009495,EVM0027331,EVM0005221,EVM0006752,EVM0019432,EVM0006319,EVM0025639,EVM…	0
greenyellow	Biological process	cellular nitrogen compound metabolic process	GO:0034641	4	0	2.67256	64	4092	65	11107	EVM0001289,EVM0004436,EVM0003304,EVM0014083,EVM0017631,EVM0021612,EVM0020446,EVM0006091,EVM0020445,EVM0010321,EVM0008750,EVM0011931,EVM0010447,EVM0013836,EVM0013516,EVM0008230,EVM0025295,EVM0003473,EVM0004441,EVM0001696,EVM0024997,EVM0022806,EVM0002505,EVM0017785,EVM0016734,EVM0019808,EVM0014118,EVM0021563,EVM0014317,EVM0009495,EVM0027331,EVM0005221,EVM0006752,EVM0019432,EVM0006319,EVM0025639,EVM…	0
greenyellow	Biological process	cellular macromolecule biosynthetic process	GO:0034645	6	0	4.36724	63	2465	65	11107	EVM0001289,EVM0004436,EVM0003304,EVM0014083,EVM0017631,EVM0021612,EVM0020446,EVM0006091,EVM0020445,EVM0010321,EVM0008750,EVM0011931,EVM0010447,EVM0013836,EVM0013516,EVM0008230,EVM0025295,EVM0003473,EVM0004441,EVM0001696,EVM0024997,EVM0022806,EVM0002505,EVM0017785,EVM0016734,EVM0019808,EVM0014118,EVM0021563,EVM0014317,EVM0009495,EVM0027331,EVM0005221,EVM0006752,EVM0019432,EVM0006319,EVM0025639,EVM…	0
greenyellow	Biological process	nucleobase-containing compound biosynthetic process	GO:0034654	6	0	5.48967	63	1961	65	11107	EVM0001289,EVM0004436,EVM0003304,EVM0014083,EVM0017631,EVM0021612,EVM0020446,EVM0006091,EVM0020445,EVM0010321,EVM0008750,EVM0011931,EVM0010447,EVM0013836,EVM0013516,EVM0008230,EVM0025295,EVM0003473,EVM0004441,EVM0001696,EVM0024997,EVM0022806,EVM0002505,EVM0017785,EVM0016734,EVM0019808,EVM0014118,EVM0021563,EVM0014317,EVM0009495,EVM0027331,EVM0005221,EVM0006752,EVM0019432,EVM0006319,EVM0025639,EVM…	0
greenyellow	Biological process	regulation of macromolecule metabolic process	GO:0060255	5	0	4.67039	63	2305	65	11107	EVM0001289,EVM0004436,EVM0003304,EVM0014083,EVM0017631,EVM0021612,EVM0020446,EVM0006091,EVM0020445,EVM0010321,EVM0008750,EVM0011931,EVM0010447,EVM0013836,EVM0013516,EVM0008230,EVM0025295,EVM0003473,EVM0004441,EVM0001696,EVM0024997,EVM0022806,EVM0002505,EVM0017785,EVM0016734,EVM0019808,EVM0014118,EVM0021563,EVM0014317,EVM0009495,EVM0027331,EVM0005221,EVM0006752,EVM0019432,EVM0006319,EVM0025639,EVM…	0
greenyellow	Biological process	biosynthetic process	GO:0009058	3	0	2.85702	63	3768	65	11107	EVM0001289,EVM0004436,EVM0003304,EVM0014083,EVM0017631,EVM0021612,EVM0020446,EVM0006091,EVM0020445,EVM0010321,EVM0008750,EVM0011931,EVM0010447,EVM0013836,EVM0013516,EVM0008230,EVM0025295,EVM0003473,EVM0004441,EVM0001696,EVM0024997,EVM0022806,EVM0002505,EVM0017785,EVM0016734,EVM0019808,EVM0014118,EVM0021563,EVM0014317,EVM0009495,EVM0027331,EVM0005221,EVM0006752,EVM0019432,EVM0006319,EVM0025639,EVM…	0
greenyellow	Biological process	macromolecule biosynthetic process	GO:0009059	5	0	4.21505	63	2554	65	11107	EVM0001289,EVM0004436,EVM0003304,EVM0014083,EVM0017631,EVM0021612,EVM0020446,EVM0006091,EVM0020445,EVM0010321,EVM0008750,EVM0011931,EVM0010447,EVM0013836,EVM0013516,EVM0008230,EVM0025295,EVM0003473,EVM0004441,EVM0001696,EVM0024997,EVM0022806,EVM0002505,EVM0017785,EVM0016734,EVM0019808,EVM0014118,EVM0021563,EVM0014317,EVM0009495,EVM0027331,EVM0005221,EVM0006752,EVM0019432,EVM0006319,EVM0025639,EVM…	0
greenyellow	Biological process	regulation of nitrogen compound metabolic process	GO:0051171	5	0	4.99084	63	2157	65	11107	EVM0001289,EVM0004436,EVM0003304,EVM0014083,EVM0017631,EVM0021612,EVM0020446,EVM0006091,EVM0020445,EVM0010321,EVM0008750,EVM0011931,EVM0010447,EVM0013836,EVM0013516,EVM0008230,EVM0025295,EVM0003473,EVM0004441,EVM0001696,EVM0024997,EVM0022806,EVM0002505,EVM0017785,EVM0016734,EVM0019808,EVM0014118,EVM0021563,EVM0014317,EVM0009495,EVM0027331,EVM0005221,EVM0006752,EVM0019432,EVM0006319,EVM0025639,EVM…	0
greenyellow	Biological process	cellular biosynthetic process	GO:0044249	4	1.11e-16	3.04447	63	3536	65	11107	EVM0001289,EVM0004436,EVM0003304,EVM0014083,EVM0017631,EVM0021612,EVM0020446,EVM0006091,EVM0020445,EVM0010321,EVM0008750,EVM0011931,EVM0010447,EVM0013836,EVM0013516,EVM0008230,EVM0025295,EVM0003473,EVM0004441,EVM0001696,EVM0024997,EVM0022806,EVM0002505,EVM0017785,EVM0016734,EVM0019808,EVM0014118,EVM0021563,EVM0014317,EVM0009495,EVM0027331,EVM0005221,EVM0006752,EVM0019432,EVM0006319,EVM0025639,EVM…	2.71e-15
greenyellow	Biological process	gene expression	GO:0010467	5	1.11e-16	3.81341	63	2823	65	11107	EVM0001289,EVM0004436,EVM0003304,EVM0014083,EVM0017631,EVM0021612,EVM0020446,EVM0006091,EVM0020445,EVM0010321,EVM0008750,EVM0011931,EVM0010447,EVM0013836,EVM0013516,EVM0008230,EVM0025295,EVM0003473,EVM0004441,EVM0001696,EVM0024997,EVM0022806,EVM0002505,EVM0017785,EVM0016734,EVM0019808,EVM0014118,EVM0021563,EVM0014317,EVM0009495,EVM0027331,EVM0005221,EVM0006752,EVM0019432,EVM0006319,EVM0025639,EVM…	2.71e-15
greenyellow	Biological process	cellular macromolecule metabolic process	GO:0044260	5	1.11e-16	2.50026	64	4374	65	11107	EVM0001289,EVM0004436,EVM0003304,EVM0014083,EVM0017631,EVM0021612,EVM0020446,EVM0006091,EVM0020445,EVM0010321,EVM0008750,EVM0011931,EVM0010447,EVM0013836,EVM0013516,EVM0008230,EVM0025295,EVM0003473,EVM0004441,EVM0001696,EVM0024997,EVM0022806,EVM0002505,EVM0017785,EVM0016734,EVM0019808,EVM0014118,EVM0021563,EVM0014317,EVM0009495,EVM0027331,EVM0005221,EVM0006752,EVM0019432,EVM0006319,EVM0025639,EVM…	2.71e-15
greenyellow	Biological process	nucleic acid-templated transcription	GO:0097659	9	1.11e-16	6.35868	63	1693	65	11107	EVM0001289,EVM0004436,EVM0003304,EVM0014083,EVM0017631,EVM0021612,EVM0020446,EVM0006091,EVM0020445,EVM0010321,EVM0008750,EVM0011931,EVM0010447,EVM0013836,EVM0013516,EVM0008230,EVM0025295,EVM0003473,EVM0004441,EVM0001696,EVM0024997,EVM0022806,EVM0002505,EVM0017785,EVM0016734,EVM0019808,EVM0014118,EVM0021563,EVM0014317,EVM0009495,EVM0027331,EVM0005221,EVM0006752,EVM0019432,EVM0006319,EVM0025639,EVM…	2.71e-15
greenyellow	Biological process	regulation of biological process	GO:0050789	3	1.11e-16	2.4472	63	4399	65	11107	EVM0001289,EVM0004436,EVM0003304,EVM0014083,EVM0017631,EVM0021612,EVM0020446,EVM0006091,EVM0020445,EVM0010321,EVM0008750,EVM0011931,EVM0010447,EVM0013836,EVM0013516,EVM0008230,EVM0025295,EVM0003473,EVM0004441,EVM0001696,EVM0024997,EVM0022806,EVM0002505,EVM0017785,EVM0016734,EVM0019808,EVM0014118,EVM0021563,EVM0014317,EVM0009495,EVM0027331,EVM0005221,EVM0006752,EVM0019432,EVM0006319,EVM0025639,EVM…	2.71e-15
greenyellow	Biological process	heterocycle biosynthetic process	GO:0018130	5	1.11e-16	4.9724	63	2165	65	11107	EVM0001289,EVM0004436,EVM0003304,EVM0014083,EVM0017631,EVM0021612,EVM0020446,EVM0006091,EVM0020445,EVM0010321,EVM0008750,EVM0011931,EVM0010447,EVM0013836,EVM0013516,EVM0008230,EVM0025295,EVM0003473,EVM0004441,EVM0001696,EVM0024997,EVM0022806,EVM0002505,EVM0017785,EVM0016734,EVM0019808,EVM0014118,EVM0021563,EVM0014317,EVM0009495,EVM0027331,EVM0005221,EVM0006752,EVM0019432,EVM0006319,EVM0025639,EVM…	2.71e-15
greenyellow	Biological process	organic cyclic compound metabolic process	GO:1901360	4	1.11e-16	2.72043	64	4020	65	11107	EVM0001289,EVM0004436,EVM0003304,EVM0014083,EVM0017631,EVM0021612,EVM0020446,EVM0006091,EVM0020445,EVM0010321,EVM0008750,EVM0011931,EVM0010447,EVM0013836,EVM0013516,EVM0008230,EVM0025295,EVM0003473,EVM0004441,EVM0001696,EVM0024997,EVM0022806,EVM0002505,EVM0017785,EVM0016734,EVM0019808,EVM0014118,EVM0021563,EVM0014317,EVM0009495,EVM0027331,EVM0005221,EVM0006752,EVM0019432,EVM0006319,EVM0025639,EVM…	2.71e-15
greenyellow	Biological process	organic substance biosynthetic process	GO:1901576	4	2.22e-16	2.95505	63	3643	65	11107	EVM0001289,EVM0004436,EVM0003304,EVM0014083,EVM0017631,EVM0021612,EVM0020446,EVM0006091,EVM0020445,EVM0010321,EVM0008750,EVM0011931,EVM0010447,EVM0013836,EVM0013516,EVM0008230,EVM0025295,EVM0003473,EVM0004441,EVM0001696,EVM0024997,EVM0022806,EVM0002505,EVM0017785,EVM0016734,EVM0019808,EVM0014118,EVM0021563,EVM0014317,EVM0009495,EVM0027331,EVM0005221,EVM0006752,EVM0019432,EVM0006319,EVM0025639,EVM…	4.16e-15
greenyellow	Biological process	nucleic acid metabolic process	GO:0090304	6	2.22e-16	3.35979	64	3255	65	11107	EVM0001289,EVM0004436,EVM0003304,EVM0014083,EVM0017631,EVM0021612,EVM0020446,EVM0006091,EVM0020445,EVM0010321,EVM0008750,EVM0011931,EVM0010447,EVM0013836,EVM0013516,EVM0008230,EVM0025295,EVM0003473,EVM0004441,EVM0001696,EVM0024997,EVM0022806,EVM0002505,EVM0017785,EVM0016734,EVM0019808,EVM0014118,EVM0021563,EVM0014317,EVM0009495,EVM0027331,EVM0005221,EVM0006752,EVM0019432,EVM0006319,EVM0025639,EVM…	4.16e-15
greenyellow	Biological process	DNA-templated transcription	GO:0006351	10	2.22e-16	6.45398	63	1668	65	11107	EVM0001289,EVM0004436,EVM0003304,EVM0014083,EVM0017631,EVM0021612,EVM0020446,EVM0006091,EVM0020445,EVM0010321,EVM0008750,EVM0011931,EVM0010447,EVM0013836,EVM0013516,EVM0008230,EVM0025295,EVM0003473,EVM0004441,EVM0001696,EVM0024997,EVM0022806,EVM0002505,EVM0017785,EVM0016734,EVM0019808,EVM0014118,EVM0021563,EVM0014317,EVM0009495,EVM0027331,EVM0005221,EVM0006752,EVM0019432,EVM0006319,EVM0025639,EVM…	4.16e-15
greenyellow	Biological process	regulation of RNA biosynthetic process	GO:2001141	8	2.22e-16	6.65754	63	1617	65	11107	EVM0001289,EVM0004436,EVM0003304,EVM0014083,EVM0017631,EVM0021612,EVM0020446,EVM0006091,EVM0020445,EVM0010321,EVM0008750,EVM0011931,EVM0010447,EVM0013836,EVM0013516,EVM0008230,EVM0025295,EVM0003473,EVM0004441,EVM0001696,EVM0024997,EVM0022806,EVM0002505,EVM0017785,EVM0016734,EVM0019808,EVM0014118,EVM0021563,EVM0014317,EVM0009495,EVM0027331,EVM0005221,EVM0006752,EVM0019432,EVM0006319,EVM0025639,EVM…	4.16e-15
greenyellow	Biological process	cellular nitrogen compound biosynthetic process	GO:0044271	5	2.22e-16	4.24665	63	2535	65	11107	EVM0001289,EVM0004436,EVM0003304,EVM0014083,EVM0017631,EVM0021612,EVM0020446,EVM0006091,EVM0020445,EVM0010321,EVM0008750,EVM0011931,EVM0010447,EVM0013836,EVM0013516,EVM0008230,EVM0025295,EVM0003473,EVM0004441,EVM0001696,EVM0024997,EVM0022806,EVM0002505,EVM0017785,EVM0016734,EVM0019808,EVM0014118,EVM0021563,EVM0014317,EVM0009495,EVM0027331,EVM0005221,EVM0006752,EVM0019432,EVM0006319,EVM0025639,EVM…	4.16e-15
greenyellow	Biological process	regulation of cellular biosynthetic process	GO:0031326	6	2.22e-16	5.76298	63	1868	65	11107	EVM0001289,EVM0004436,EVM0003304,EVM0014083,EVM0017631,EVM0021612,EVM0020446,EVM0006091,EVM0020445,EVM0010321,EVM0008750,EVM0011931,EVM0010447,EVM0013836,EVM0013516,EVM0008230,EVM0025295,EVM0003473,EVM0004441,EVM0001696,EVM0024997,EVM0022806,EVM0002505,EVM0017785,EVM0016734,EVM0019808,EVM0014118,EVM0021563,EVM0014317,EVM0009495,EVM0027331,EVM0005221,EVM0006752,EVM0019432,EVM0006319,EVM0025639,EVM…	4.16e-15
greenyellow	Biological process	nitrogen compound metabolic process	GO:0006807	3	2.22e-16	1.81935	64	6011	65	11107	EVM0001289,EVM0004436,EVM0003304,EVM0014083,EVM0017631,EVM0021612,EVM0020446,EVM0006091,EVM0020445,EVM0010321,EVM0008750,EVM0011931,EVM0010447,EVM0013836,EVM0013516,EVM0008230,EVM0025295,EVM0003473,EVM0004441,EVM0001696,EVM0024997,EVM0022806,EVM0002505,EVM0017785,EVM0016734,EVM0019808,EVM0014118,EVM0021563,EVM0014317,EVM0009495,EVM0027331,EVM0005221,EVM0006752,EVM0019432,EVM0006319,EVM0025639,EVM…	4.16e-15
greenyellow	Biological process	regulation of nucleic acid-templated transcription	GO:1903506	9	2.22e-16	6.65754	63	1617	65	11107	EVM0001289,EVM0004436,EVM0003304,EVM0014083,EVM0017631,EVM0021612,EVM0020446,EVM0006091,EVM0020445,EVM0010321,EVM0008750,EVM0011931,EVM0010447,EVM0013836,EVM0013516,EVM0008230,EVM0025295,EVM0003473,EVM0004441,EVM0001696,EVM0024997,EVM0022806,EVM0002505,EVM0017785,EVM0016734,EVM0019808,EVM0014118,EVM0021563,EVM0014317,EVM0009495,EVM0027331,EVM0005221,EVM0006752,EVM0019432,EVM0006319,EVM0025639,EVM…	4.16e-15
greenyellow	Biological process	regulation of macromolecule biosynthetic process	GO:0010556	6	3.33e-16	5.99735	63	1795	65	11107	EVM0001289,EVM0004436,EVM0003304,EVM0014083,EVM0017631,EVM0021612,EVM0020446,EVM0006091,EVM0020445,EVM0010321,EVM0008750,EVM0011931,EVM0010447,EVM0013836,EVM0013516,EVM0008230,EVM0025295,EVM0003473,EVM0004441,EVM0001696,EVM0024997,EVM0022806,EVM0002505,EVM0017785,EVM0016734,EVM0019808,EVM0014118,EVM0021563,EVM0014317,EVM0009495,EVM0027331,EVM0005221,EVM0006752,EVM0019432,EVM0006319,EVM0025639,EVM…	4.93e-15
greenyellow	Biological process	aromatic compound biosynthetic process	GO:0019438	5	3.33e-16	4.79949	63	2243	65	11107	EVM0001289,EVM0004436,EVM0003304,EVM0014083,EVM0017631,EVM0021612,EVM0020446,EVM0006091,EVM0020445,EVM0010321,EVM0008750,EVM0011931,EVM0010447,EVM0013836,EVM0013516,EVM0008230,EVM0025295,EVM0003473,EVM0004441,EVM0001696,EVM0024997,EVM0022806,EVM0002505,EVM0017785,EVM0016734,EVM0019808,EVM0014118,EVM0021563,EVM0014317,EVM0009495,EVM0027331,EVM0005221,EVM0006752,EVM0019432,EVM0006319,EVM0025639,EVM…	4.93e-15
greenyellow	Biological process	heterocycle metabolic process	GO:0046483	4	4.44e-16	2.88324	64	3793	65	11107	EVM0001289,EVM0004436,EVM0003304,EVM0014083,EVM0017631,EVM0021612,EVM0020446,EVM0006091,EVM0020445,EVM0010321,EVM0008750,EVM0011931,EVM0010447,EVM0013836,EVM0013516,EVM0008230,EVM0025295,EVM0003473,EVM0004441,EVM0001696,EVM0024997,EVM0022806,EVM0002505,EVM0017785,EVM0016734,EVM0019808,EVM0014118,EVM0021563,EVM0014317,EVM0009495,EVM0027331,EVM0005221,EVM0006752,EVM0019432,EVM0006319,EVM0025639,EVM…	6.24e-15
greenyellow	Biological process	regulation of metabolic process	GO:0019222	4	4.44e-16	4.27192	63	2520	65	11107	EVM0001289,EVM0004436,EVM0003304,EVM0014083,EVM0017631,EVM0021612,EVM0020446,EVM0006091,EVM0020445,EVM0010321,EVM0008750,EVM0011931,EVM0010447,EVM0013836,EVM0013516,EVM0008230,EVM0025295,EVM0003473,EVM0004441,EVM0001696,EVM0024997,EVM0022806,EVM0002505,EVM0017785,EVM0016734,EVM0019808,EVM0014118,EVM0021563,EVM0014317,EVM0009495,EVM0027331,EVM0005221,EVM0006752,EVM0019432,EVM0006319,EVM0025639,EVM…	6.24e-15
greenyellow	Biological process	nucleobase-containing compound metabolic process	GO:0006139	5	4.44e-16	3.0893	64	3540	65	11107	EVM0001289,EVM0004436,EVM0003304,EVM0014083,EVM0017631,EVM0021612,EVM0020446,EVM0006091,EVM0020445,EVM0010321,EVM0008750,EVM0011931,EVM0010447,EVM0013836,EVM0013516,EVM0008230,EVM0025295,EVM0003473,EVM0004441,EVM0001696,EVM0024997,EVM0022806,EVM0002505,EVM0017785,EVM0016734,EVM0019808,EVM0014118,EVM0021563,EVM0014317,EVM0009495,EVM0027331,EVM0005221,EVM0006752,EVM0019432,EVM0006319,EVM0025639,EVM…	6.24e-15
greenyellow	Biological process	primary metabolic process	GO:0044238	3	1.34e-13	1.64404	64	6652	65	11107	EVM0001289,EVM0004436,EVM0003304,EVM0014083,EVM0017631,EVM0021612,EVM0020446,EVM0006091,EVM0020445,EVM0010321,EVM0008750,EVM0011931,EVM0010447,EVM0013836,EVM0013516,EVM0008230,EVM0025295,EVM0003473,EVM0004441,EVM0001696,EVM0024997,EVM0022806,EVM0002505,EVM0017785,EVM0016734,EVM0019808,EVM0014118,EVM0021563,EVM0014317,EVM0009495,EVM0027331,EVM0005221,EVM0006752,EVM0019432,EVM0006319,EVM0025639,EVM…	1.75e-12
greenyellow	Biological process	cellular metabolic process	GO:0044237	3	6.23e-12	1.5464	64	7072	65	11107	EVM0001289,EVM0004436,EVM0003304,EVM0014083,EVM0017631,EVM0021612,EVM0020446,EVM0006091,EVM0020445,EVM0010321,EVM0008750,EVM0011931,EVM0010447,EVM0013836,EVM0013516,EVM0008230,EVM0025295,EVM0003473,EVM0004441,EVM0001696,EVM0024997,EVM0022806,EVM0002505,EVM0017785,EVM0016734,EVM0019808,EVM0014118,EVM0021563,EVM0014317,EVM0009495,EVM0027331,EVM0005221,EVM0006752,EVM0019432,EVM0006319,EVM0025639,EVM…	7.96e-11
greenyellow	Biological process	organic substance metabolic process	GO:0071704	3	6.28e-12	1.54618	64	7073	65	11107	EVM0001289,EVM0004436,EVM0003304,EVM0014083,EVM0017631,EVM0021612,EVM0020446,EVM0006091,EVM0020445,EVM0010321,EVM0008750,EVM0011931,EVM0010447,EVM0013836,EVM0013516,EVM0008230,EVM0025295,EVM0003473,EVM0004441,EVM0001696,EVM0024997,EVM0022806,EVM0002505,EVM0017785,EVM0016734,EVM0019808,EVM0014118,EVM0021563,EVM0014317,EVM0009495,EVM0027331,EVM0005221,EVM0006752,EVM0019432,EVM0006319,EVM0025639,EVM…	7.85e-11
greenyellow	Biological process	metabolic process	GO:0008152	2	1.63e-09	1.4144	64	7732	65	11107	EVM0001289,EVM0004436,EVM0003304,EVM0014083,EVM0017631,EVM0021612,EVM0020446,EVM0006091,EVM0020445,EVM0010321,EVM0008750,EVM0011931,EVM0010447,EVM0013836,EVM0013516,EVM0008230,EVM0025295,EVM0003473,EVM0004441,EVM0001696,EVM0024997,EVM0022806,EVM0002505,EVM0017785,EVM0016734,EVM0019808,EVM0014118,EVM0021563,EVM0014317,EVM0009495,EVM0027331,EVM0005221,EVM0006752,EVM0019432,EVM0006319,EVM0025639,EVM…	1.99e-08
greenyellow	Biological process	positive regulation of DNA-templated transcription	GO:0045893	11	1.75e-08	5.97472	15	429	65	11107	EVM0003304,EVM0020446,EVM0010321,EVM0025295,EVM0004441,EVM0001696,EVM0002505,EVM0014317,EVM0009495,EVM0027331,EVM0006752,EVM0006319,EVM0012521,EVM0017736,EVM0018213,	2.1e-07
greenyellow	Biological process	positive regulation of RNA metabolic process	GO:0051254	8	3.17e-08	5.26788	16	519	65	11107	EVM0003304,EVM0020446,EVM0010321,EVM0025295,EVM0004441,EVM0001696,EVM0002505,EVM0014317,EVM0009495,EVM0027331,EVM0006752,EVM0006319,EVM0012521,EVM0019710,EVM0017736,EVM0018213,	3.72e-07
greenyellow	Biological process	positive regulation of RNA biosynthetic process	GO:1902680	9	3.42e-08	5.68327	15	451	65	11107	EVM0003304,EVM0020446,EVM0010321,EVM0025295,EVM0004441,EVM0001696,EVM0002505,EVM0014317,EVM0009495,EVM0027331,EVM0006752,EVM0006319,EVM0012521,EVM0017736,EVM0018213,	3.92e-07
greenyellow	Biological process	positive regulation of nucleic acid-templated transcription	GO:1903508	10	3.42e-08	5.68327	15	451	65	11107	EVM0003304,EVM0020446,EVM0010321,EVM0025295,EVM0004441,EVM0001696,EVM0002505,EVM0014317,EVM0009495,EVM0027331,EVM0006752,EVM0006319,EVM0012521,EVM0017736,EVM0018213,	3.92e-07
greenyellow	Biological process	positive regulation of nucleobase-containing compound metabolic process	GO:0045935	7	8.69e-08	4.8997	16	558	65	11107	EVM0003304,EVM0020446,EVM0010321,EVM0025295,EVM0004441,EVM0001696,EVM0002505,EVM0014317,EVM0009495,EVM0027331,EVM0006752,EVM0006319,EVM0012521,EVM0019710,EVM0017736,EVM0018213,	9.58e-07
greenyellow	Biological process	positive regulation of macromolecule biosynthetic process	GO:0010557	7	1.72e-07	5.02579	15	510	65	11107	EVM0003304,EVM0020446,EVM0010321,EVM0025295,EVM0004441,EVM0001696,EVM0002505,EVM0014317,EVM0009495,EVM0027331,EVM0006752,EVM0006319,EVM0012521,EVM0017736,EVM0018213,	1.85e-06
greenyellow	Biological process	positive regulation of cellular biosynthetic process	GO:0031328	7	2.75e-07	4.84528	15	529	65	11107	EVM0003304,EVM0020446,EVM0010321,EVM0025295,EVM0004441,EVM0001696,EVM0002505,EVM0014317,EVM0009495,EVM0027331,EVM0006752,EVM0006319,EVM0012521,EVM0017736,EVM0018213,	2.92e-06
greenyellow	Biological process	positive regulation of gene expression	GO:0010628	7	2.96e-07	4.81796	15	532	65	11107	EVM0003304,EVM0020446,EVM0010321,EVM0025295,EVM0004441,EVM0001696,EVM0002505,EVM0014317,EVM0009495,EVM0027331,EVM0006752,EVM0006319,EVM0012521,EVM0017736,EVM0018213,	3.08e-06
greenyellow	Biological process	xylem development	GO:0010089	6	4.65e-07	20.1032	6	51	65	11107	EVM0020446,EVM0010447,EVM0008230,EVM0025295,EVM0012521,EVM0025544,	4.75e-06
greenyellow	Biological process	positive regulation of biosynthetic process	GO:0009891	6	4.86e-07	4.635	15	553	65	11107	EVM0003304,EVM0020446,EVM0010321,EVM0025295,EVM0004441,EVM0001696,EVM0002505,EVM0014317,EVM0009495,EVM0027331,EVM0006752,EVM0006319,EVM0012521,EVM0017736,EVM0018213,	4.88e-06
greenyellow	Biological process	positive regulation of nitrogen compound metabolic process	GO:0051173	6	2.52e-06	3.81315	16	717	65	11107	EVM0003304,EVM0020446,EVM0010321,EVM0025295,EVM0004441,EVM0001696,EVM0002505,EVM0014317,EVM0009495,EVM0027331,EVM0006752,EVM0006319,EVM0012521,EVM0019710,EVM0017736,EVM0018213,	2.49e-05
greenyellow	Biological process	positive regulation of cellular metabolic process	GO:0031325	6	4.92e-06	3.62123	16	755	65	11107	EVM0003304,EVM0020446,EVM0010321,EVM0025295,EVM0004441,EVM0001696,EVM0002505,EVM0014317,EVM0009495,EVM0027331,EVM0006752,EVM0006319,EVM0012521,EVM0019710,EVM0017736,EVM0018213,	4.69e-05
greenyellow	Biological process	positive regulation of macromolecule metabolic process	GO:0010604	6	6.88e-06	3.52778	16	775	65	11107	EVM0003304,EVM0020446,EVM0010321,EVM0025295,EVM0004441,EVM0001696,EVM0002505,EVM0014317,EVM0009495,EVM0027331,EVM0006752,EVM0006319,EVM0012521,EVM0019710,EVM0017736,EVM0018213,	6.44e-05
greenyellow	Biological process	positive regulation of metabolic process	GO:0009893	5	2.36e-05	3.1977	16	855	65	11107	EVM0003304,EVM0020446,EVM0010321,EVM0025295,EVM0004441,EVM0001696,EVM0002505,EVM0014317,EVM0009495,EVM0027331,EVM0006752,EVM0006319,EVM0012521,EVM0019710,EVM0017736,EVM0018213,	0.00021783
greenyellow	Biological process	phloem or xylem histogenesis	GO:0010087	5	3.43e-05	9.67228	6	106	65	11107	EVM0020446,EVM0010447,EVM0008230,EVM0025295,EVM0012521,EVM0025544,	0.000310823
greenyellow	Biological process	regionalization	GO:0003002	4	5.74e-05	7.03611	7	170	65	11107	EVM0013836,EVM0017785,EVM0021563,EVM0007008,EVM0019432,EVM0009143,EVM0025544,	0.00051179
greenyellow	Biological process	regulation of transcription by RNA polymerase II	GO:0006357	11	0.000113969	4.6887	9	328	65	11107	EVM0004436,EVM0006091,EVM0008750,EVM0004441,EVM0001696,EVM0024997,EVM0009495,EVM0027331,EVM0006319,	0.000985391
greenyellow	Biological process	developmental process	GO:0032502	2	0.000138592	1.7993	32	3039	65	11107	EVM0004436,EVM0014083,EVM0020446,EVM0006091,EVM0020445,EVM0010321,EVM0008750,EVM0011931,EVM0010447,EVM0013836,EVM0013516,EVM0008230,EVM0025295,EVM0003473,EVM0004441,EVM0001696,EVM0022806,EVM0002505,EVM0017785,EVM0019808,EVM0014118,EVM0021563,EVM0009495,EVM0007008,EVM0019432,EVM0006319,EVM0025639,EVM0017097,EVM0012521,EVM0009143,EVM0025544,EVM0011941,	0.00118013
greenyellow	Biological process	pattern specification process	GO:0007389	3	0.000221111	5.6689	7	211	65	11107	EVM0013836,EVM0017785,EVM0021563,EVM0007008,EVM0019432,EVM0009143,EVM0025544,	0.00185469
greenyellow	Biological process	tissue development	GO:0009888	4	0.000293275	3.00595	13	739	65	11107	EVM0020446,EVM0010447,EVM0013516,EVM0008230,EVM0025295,EVM0002505,EVM0017785,EVM0019808,EVM0014118,EVM0025639,EVM0012521,EVM0009143,EVM0025544,	0.00242383
greenyellow	Biological process	transcription by RNA polymerase II	GO:0006366	11	0.000329583	4.0685	9	378	65	11107	EVM0004436,EVM0006091,EVM0008750,EVM0004441,EVM0001696,EVM0024997,EVM0009495,EVM0027331,EVM0006319,	0.00268443
greenyellow	Biological process	positive regulation of cellular process	GO:0048522	5	0.000376461	2.53151	16	1080	65	11107	EVM0003304,EVM0020446,EVM0010321,EVM0025295,EVM0004441,EVM0001696,EVM0002505,EVM0014317,EVM0009495,EVM0027331,EVM0006752,EVM0006319,EVM0012521,EVM0019710,EVM0017736,EVM0018213,	0.00293849
greenyellow	Biological process	response to salicylic acid	GO:0009751	6	0.000805075	5.42466	6	189	65	11107	EVM0004436,EVM0006091,EVM0008750,EVM0004441,EVM0017736,EVM0018213,	0.00611422
greenyellow	Biological process	response to organic substance	GO:0010033	4	0.00100008	1.9448	22	1933	65	11107	EVM0001289,EVM0004436,EVM0003304,EVM0014083,EVM0021612,EVM0006091,EVM0010321,EVM0008750,EVM0013516,EVM0004441,EVM0022806,EVM0017785,EVM0016734,EVM0021563,EVM0027331,EVM0006752,EVM0018423,EVM0012120,EVM0022005,EVM0013339,EVM0017736,EVM0018213,	0.00749396
greenyellow	Biological process	response to chitin	GO:0010200	6	0.00146536	5.97472	5	143	65	11107	EVM0001289,EVM0003304,EVM0010321,EVM0018423,EVM0022005,	0.0105581
greenyellow	Biological process	anatomical structure development	GO:0048856	3	0.00179016	1.66942	28	2866	65	11107	EVM0014083,EVM0020446,EVM0020445,EVM0010321,EVM0011931,EVM0010447,EVM0013836,EVM0013516,EVM0008230,EVM0025295,EVM0003473,EVM0004441,EVM0022806,EVM0002505,EVM0017785,EVM0019808,EVM0014118,EVM0021563,EVM0009495,EVM0007008,EVM0019432,EVM0006319,EVM0025639,EVM0017097,EVM0012521,EVM0009143,EVM0025544,EVM0011941,	0.0127351
greenyellow	Biological process	positive regulation of biological process	GO:0048518	4	0.00182104	2.11882	17	1371	65	11107	EVM0003304,EVM0020446,EVM0010321,EVM0025295,EVM0004441,EVM0001696,EVM0002505,EVM0021563,EVM0014317,EVM0009495,EVM0027331,EVM0006752,EVM0006319,EVM0012521,EVM0019710,EVM0017736,EVM0018213,	0.0127928
greenyellow	Biological process	response to antibiotic	GO:0046677	4	0.00210591	3.871	7	309	65	11107	EVM0004436,EVM0003304,EVM0006091,EVM0008750,EVM0004441,EVM0017736,EVM0018213,	0.0146114
greenyellow	Biological process	post-embryonic development	GO:0009791	3	0.00254163	1.99597	18	1541	65	11107	EVM0014083,EVM0020445,EVM0010321,EVM0011931,EVM0010447,EVM0003473,EVM0004441,EVM0022806,EVM0002505,EVM0017785,EVM0014118,EVM0021563,EVM0009495,EVM0007008,EVM0006319,EVM0025639,EVM0017097,EVM0009143,	0.0172096
greenyellow	Biological process	cellular process	GO:0009987	2	0.00301036	1.11434	64	9814	65	11107	EVM0001289,EVM0004436,EVM0003304,EVM0014083,EVM0017631,EVM0021612,EVM0020446,EVM0006091,EVM0020445,EVM0010321,EVM0008750,EVM0011931,EVM0010447,EVM0013836,EVM0013516,EVM0008230,EVM0025295,EVM0003473,EVM0004441,EVM0001696,EVM0024997,EVM0022806,EVM0002505,EVM0017785,EVM0016734,EVM0019808,EVM0014118,EVM0021563,EVM0014317,EVM0009495,EVM0027331,EVM0005221,EVM0006752,EVM0019432,EVM0006319,EVM0025639,EVM…	0.0201408
greenyellow	Biological process	shoot system development	GO:0048367	5	0.00350395	2.40672	12	852	65	11107	EVM0014083,EVM0010321,EVM0011931,EVM0013836,EVM0022806,EVM0002505,EVM0014118,EVM0007008,EVM0019432,EVM0025639,EVM0009143,EVM0011941,	0.0231673
greenyellow	Biological process	phyllome development	GO:0048827	5	0.00375144	2.87457	9	535	65	11107	EVM0014083,EVM0013836,EVM0022806,EVM0002505,EVM0014118,EVM0007008,EVM0019432,EVM0025639,EVM0009143,	0.0245152
greenyellow	Biological process	cell differentiation	GO:0030154	4	0.0042307	2.47648	11	759	65	11107	EVM0004436,EVM0014083,EVM0006091,EVM0008750,EVM0013516,EVM0004441,EVM0001696,EVM0009495,EVM0006319,EVM0025639,EVM0025544,	0.0270188
greenyellow	Biological process	system development	GO:0048731	4	0.0043349	1.81302	20	1885	65	11107	EVM0014083,EVM0020445,EVM0010321,EVM0011931,EVM0010447,EVM0013836,EVM0013516,EVM0003473,EVM0004441,EVM0022806,EVM0002505,EVM0017785,EVM0014118,EVM0021563,EVM0007008,EVM0019432,EVM0025639,EVM0017097,EVM0009143,EVM0011941,	0.0270691
greenyellow	Biological process	plant organ development	GO:0099402	4	0.00525006	2.19073	13	1014	65	11107	EVM0014083,EVM0020445,EVM0013836,EVM0013516,EVM0022806,EVM0002505,EVM0017785,EVM0014118,EVM0021563,EVM0007008,EVM0019432,EVM0025639,EVM0009143,	0.032071
greenyellow	Biological process	response to hormone	GO:0009725	5	0.00553156	1.90736	17	1523	65	11107	EVM0004436,EVM0014083,EVM0021612,EVM0006091,EVM0008750,EVM0013516,EVM0004441,EVM0022806,EVM0017785,EVM0016734,EVM0021563,EVM0006752,EVM0018423,EVM0012120,EVM0013339,EVM0017736,EVM0018213,	0.0334273
greenyellow	Biological process	response to heat	GO:0009408	5	0.00701367	4.1475	5	206	65	11107	EVM0001289,EVM0003304,EVM0027331,EVM0022005,EVM0017736,	0.0410592
greenyellow	Biological process	response to endogenous stimulus	GO:0009719	3	0.00751143	1.85026	17	1570	65	11107	EVM0004436,EVM0014083,EVM0021612,EVM0006091,EVM0008750,EVM0013516,EVM0004441,EVM0022806,EVM0017785,EVM0016734,EVM0021563,EVM0006752,EVM0018423,EVM0012120,EVM0013339,EVM0017736,EVM0018213,	0.0422142
greenyellow	Biological process	vegetative to reproductive phase transition of meristem	GO:0010228	4	0.00774221	4.04922	5	211	65	11107	EVM0020445,EVM0010321,EVM0011931,EVM0003473,EVM0002505,	0.0422439
greenyellow	Biological process	response to oxygen-containing compound	GO:1901700	4	0.00851413	1.82699	17	1590	65	11107	EVM0001289,EVM0004436,EVM0003304,EVM0021612,EVM0006091,EVM0010321,EVM0008750,EVM0013516,EVM0004441,EVM0006752,EVM0018423,EVM0012120,EVM0022005,EVM0013339,EVM0017736,EVM0022360,EVM0018213,	0.0460091
greenyellow	Biological process	multicellular organism development	GO:0007275	4	0.00932663	1.60743	23	2445	65	11107	EVM0014083,EVM0020445,EVM0010321,EVM0011931,EVM0010447,EVM0013836,EVM0013516,EVM0003473,EVM0004441,EVM0022806,EVM0002505,EVM0017785,EVM0014118,EVM0021563,EVM0009495,EVM0007008,EVM0019432,EVM0006319,EVM0025639,EVM0017097,EVM0009143,EVM0025544,EVM0011941,	0.0489866
greenyellow	Biological process	response to xenobiotic stimulus	GO:0009410	4	0.0130479	2.1215	11	886	65	11107	EVM0001289,EVM0004436,EVM0003304,EVM0006091,EVM0010321,EVM0008750,EVM0004441,EVM0018423,EVM0022005,EVM0017736,EVM0018213,	0.0654727
greenyellow	Biological process	response to auxin	GO:0009733	6	0.0137148	3.04232	6	337	65	11107	EVM0014083,EVM0004441,EVM0022806,EVM0017785,EVM0021563,EVM0018213,	0.0682099
greenyellow	Biological process	reproductive system development	GO:0061458	5	0.0149392	1.92496	13	1154	65	11107	EVM0014083,EVM0020445,EVM0010321,EVM0011931,EVM0010447,EVM0003473,EVM0004441,EVM0002505,EVM0014118,EVM0007008,EVM0025639,EVM0017097,EVM0009143,	0.071759
greenyellow	Biological process	reproductive structure development	GO:0048608	4	0.0149392	1.92496	13	1154	65	11107	EVM0014083,EVM0020445,EVM0010321,EVM0011931,EVM0010447,EVM0003473,EVM0004441,EVM0002505,EVM0014118,EVM0007008,EVM0025639,EVM0017097,EVM0009143,	0.071759
greenyellow	Biological process	multicellular organismal process	GO:0032501	2	0.0160189	1.51498	24	2707	65	11107	EVM0014083,EVM0020445,EVM0010321,EVM0011931,EVM0010447,EVM0013836,EVM0013516,EVM0003473,EVM0004441,EVM0022806,EVM0002505,EVM0017785,EVM0019808,EVM0014118,EVM0021563,EVM0009495,EVM0007008,EVM0019432,EVM0006319,EVM0025639,EVM0017097,EVM0009143,EVM0025544,EVM0011941,	0.0750219
greenyellow	Biological process	cellular developmental process	GO:0048869	3	0.018599	2.01463	11	933	65	11107	EVM0004436,EVM0014083,EVM0006091,EVM0008750,EVM0013516,EVM0004441,EVM0001696,EVM0009495,EVM0006319,EVM0025639,EVM0025544,	0.0829574
greenyellow	Biological process	response to organonitrogen compound	GO:0010243	5	0.0206604	3.16439	5	270	65	11107	EVM0001289,EVM0003304,EVM0010321,EVM0018423,EVM0022005,	0.090712
greenyellow	Biological process	leaf development	GO:0048366	6	0.0212829	2.75608	6	372	65	11107	EVM0014083,EVM0013836,EVM0022806,EVM0002505,EVM0019432,EVM0025639,	0.0920077
greenyellow	Biological process	response to light stimulus	GO:0009416	5	0.0329325	2.01295	9	764	65	11107	EVM0003304,EVM0010321,EVM0011931,EVM0003473,EVM0002505,EVM0014317,EVM0009495,EVM0006319,EVM0013400,	0.132201
greenyellow	Biological process	response to organic cyclic compound	GO:0014070	5	0.033283	2.48247	6	413	65	11107	EVM0004436,EVM0006091,EVM0008750,EVM0004441,EVM0017736,EVM0018213,	0.130804
greenyellow	Biological process	meristem development	GO:0048507	5	0.0339011	2.77398	5	308	65	11107	EVM0013516,EVM0002505,EVM0017785,EVM0019808,EVM0009143,	0.132309
greenyellow	Biological process	regulation of developmental process	GO:0050793	4	0.0398222	1.94424	9	791	65	11107	EVM0014083,EVM0010321,EVM0011931,EVM0010447,EVM0013516,EVM0004441,EVM0002505,EVM0021563,EVM0011941,	0.146275
greenyellow	Biological process	hormone-mediated signaling pathway	GO:0009755	6	0.0401864	2.04643	8	668	65	11107	EVM0021612,EVM0013516,EVM0004441,EVM0017785,EVM0016734,EVM0021563,EVM0018423,EVM0013339,	0.146654
greenyellow	Biological process	response to temperature stimulus	GO:0009266	4	0.0437259	2.14362	7	558	65	11107	EVM0001289,EVM0003304,EVM0011931,EVM0004441,EVM0027331,EVM0022005,EVM0017736,	0.156522
greenyellow	Biological process	response to acid chemical	GO:0001101	4	0.0464284	1.74688	11	1076	65	11107	EVM0004436,EVM0021612,EVM0006091,EVM0008750,EVM0013516,EVM0004441,EVM0006752,EVM0012120,EVM0017736,EVM0022360,EVM0018213,	0.162067
greenyellow	Biological process	response to radiation	GO:0009314	4	0.0476484	1.88006	9	818	65	11107	EVM0003304,EVM0010321,EVM0011931,EVM0003473,EVM0002505,EVM0014317,EVM0009495,EVM0006319,EVM0013400,	0.161316
lightcyan	Molecular function	DNA-binding transcription factor activity	GO:0003700	3	1.04e-10	7.0982	13	1146	15	9386	EVM0001325,EVM0015253,EVM0019979,EVM0009565,EVM0021373,EVM0008431,EVM0020140,EVM0023152,EVM0009976,EVM0019045,EVM0015722,EVM0013549,EVM0001290,	2.82e-09
lightcyan	Molecular function	transcription regulator activity	GO:0140110	2	2.35e-10	6.66219	13	1221	15	9386	EVM0001325,EVM0015253,EVM0019979,EVM0009565,EVM0021373,EVM0008431,EVM0020140,EVM0023152,EVM0009976,EVM0019045,EVM0015722,EVM0013549,EVM0001290,	3.17e-09
lightcyan	Molecular function	transcription cis-regulatory region binding	GO:0000976	8	0.000129205	9.28388	5	337	15	9386	EVM0009565,EVM0008431,EVM0023152,EVM0015722,EVM0013549,	0.000387616
lightcyan	Molecular function	transcription regulatory region nucleic acid binding	GO:0001067	5	0.000129205	9.28388	5	337	15	9386	EVM0009565,EVM0008431,EVM0023152,EVM0015722,EVM0013549,	0.000387616
lightcyan	Molecular function	sequence-specific double-stranded DNA binding	GO:1990837	7	0.000195536	8.50181	5	368	15	9386	EVM0009565,EVM0008431,EVM0023152,EVM0015722,EVM0013549,	0.000479952
lightcyan	Molecular function	double-stranded DNA binding	GO:0003690	6	0.000519325	6.89134	5	454	15	9386	EVM0009565,EVM0008431,EVM0023152,EVM0015722,EVM0013549,	0.00116848
lightcyan	Molecular function	sequence-specific DNA binding	GO:0043565	6	0.00220737	5.00587	5	625	15	9386	EVM0009565,EVM0008431,EVM0023152,EVM0015722,EVM0013549,	0.00425706
lightcyan	Molecular function	DNA binding	GO:0003677	5	0.0141764	3.24214	5	965	15	9386	EVM0009565,EVM0008431,EVM0023152,EVM0015722,EVM0013549,	0.0255175
lightcyan	Molecular function	nucleic acid binding	GO:0003676	4	0.0313083	2.09978	7	2086	15	9386	EVM0009565,EVM0008431,EVM0023152,EVM0010945,EVM0025842,EVM0015722,EVM0013549,	0.0528327
lightcyan	Cellular component	nucleus	GO:0005634	6	0.000331766	2.53899	11	3448	14	11142	EVM0005249,EVM0001325,EVM0009565,EVM0008431,EVM0020140,EVM0023152,EVM0019045,EVM0015722,EVM0013549,EVM0008340,EVM0001290,	0.00763061
lightcyan	Biological process	regulation of RNA metabolic process	GO:0051252	7	3.8e-10	5.34401	15	1732	18	11107	EVM0001325,EVM0015253,EVM0019979,EVM0009565,EVM0021373,EVM0008431,EVM0020140,EVM0023152,EVM0010945,EVM0009976,EVM0025842,EVM0019045,EVM0015722,EVM0013549,EVM0001290,	8.77e-08
lightcyan	Biological process	regulation of cellular macromolecule biosynthetic process	GO:2000112	7	4.68e-10	5.26798	15	1757	18	11107	EVM0001325,EVM0015253,EVM0019979,EVM0009565,EVM0021373,EVM0008431,EVM0020140,EVM0023152,EVM0010945,EVM0009976,EVM0025842,EVM0019045,EVM0015722,EVM0013549,EVM0001290,	5.4e-08
lightcyan	Biological process	regulation of macromolecule biosynthetic process	GO:0010556	6	6.38e-10	5.15645	15	1795	18	11107	EVM0001325,EVM0015253,EVM0019979,EVM0009565,EVM0021373,EVM0008431,EVM0020140,EVM0023152,EVM0010945,EVM0009976,EVM0025842,EVM0019045,EVM0015722,EVM0013549,EVM0001290,	4.92e-08
lightcyan	Biological process	regulation of nucleobase-containing compound metabolic process	GO:0019219	6	8.58e-10	5.05231	15	1832	18	11107	EVM0001325,EVM0015253,EVM0019979,EVM0009565,EVM0021373,EVM0008431,EVM0020140,EVM0023152,EVM0010945,EVM0009976,EVM0025842,EVM0019045,EVM0015722,EVM0013549,EVM0001290,	4.96e-08
lightcyan	Biological process	regulation of cellular biosynthetic process	GO:0031326	6	1.14e-09	4.95494	15	1868	18	11107	EVM0001325,EVM0015253,EVM0019979,EVM0009565,EVM0021373,EVM0008431,EVM0020140,EVM0023152,EVM0010945,EVM0009976,EVM0025842,EVM0019045,EVM0015722,EVM0013549,EVM0001290,	5.26e-08
lightcyan	Biological process	regulation of biosynthetic process	GO:0009889	5	1.54e-09	4.85361	15	1907	18	11107	EVM0001325,EVM0015253,EVM0019979,EVM0009565,EVM0021373,EVM0008431,EVM0020140,EVM0023152,EVM0010945,EVM0009976,EVM0025842,EVM0019045,EVM0015722,EVM0013549,EVM0001290,	5.91e-08
lightcyan	Biological process	regulation of gene expression	GO:0010468	6	2.51e-09	4.69125	15	1973	18	11107	EVM0001325,EVM0015253,EVM0019979,EVM0009565,EVM0021373,EVM0008431,EVM0020140,EVM0023152,EVM0010945,EVM0009976,EVM0025842,EVM0019045,EVM0015722,EVM0013549,EVM0001290,	8.29e-08
lightcyan	Biological process	regulation of cellular process	GO:0050794	4	8.69e-09	2.80055	18	3966	18	11107	EVM0023172,EVM0001325,EVM0019031,EVM0015253,EVM0019979,EVM0009565,EVM0021373,EVM0008431,EVM0020140,EVM0023152,EVM0010945,EVM0009976,EVM0025842,EVM0019045,EVM0015722,EVM0013549,EVM0008340,EVM0001290,	2.51e-07
lightcyan	Biological process	regulation of nitrogen compound metabolic process	GO:0051171	5	9.09e-09	4.29107	15	2157	18	11107	EVM0001325,EVM0015253,EVM0019979,EVM0009565,EVM0021373,EVM0008431,EVM0020140,EVM0023152,EVM0010945,EVM0009976,EVM0025842,EVM0019045,EVM0015722,EVM0013549,EVM0001290,	2.33e-07
lightcyan	Biological process	regulation of primary metabolic process	GO:0080090	5	1.22e-08	4.20338	15	2202	18	11107	EVM0001325,EVM0015253,EVM0019979,EVM0009565,EVM0021373,EVM0008431,EVM0020140,EVM0023152,EVM0010945,EVM0009976,EVM0025842,EVM0019045,EVM0015722,EVM0013549,EVM0001290,	2.82e-07
lightcyan	Biological process	regulation of cellular metabolic process	GO:0031323	5	1.95e-08	4.0685	15	2275	18	11107	EVM0001325,EVM0015253,EVM0019979,EVM0009565,EVM0021373,EVM0008431,EVM0020140,EVM0023152,EVM0010945,EVM0009976,EVM0025842,EVM0019045,EVM0015722,EVM0013549,EVM0001290,	4.1e-07
lightcyan	Biological process	regulation of macromolecule metabolic process	GO:0060255	5	2.36e-08	4.01555	15	2305	18	11107	EVM0001325,EVM0015253,EVM0019979,EVM0009565,EVM0021373,EVM0008431,EVM0020140,EVM0023152,EVM0010945,EVM0009976,EVM0025842,EVM0019045,EVM0015722,EVM0013549,EVM0001290,	4.53e-07
lightcyan	Biological process	regulation of DNA-templated transcription	GO:0006355	10	4.23e-08	5.05146	13	1588	18	11107	EVM0001325,EVM0015253,EVM0019979,EVM0009565,EVM0021373,EVM0008431,EVM0020140,EVM0023152,EVM0009976,EVM0019045,EVM0015722,EVM0013549,EVM0001290,	7.52e-07
lightcyan	Biological process	regulation of RNA biosynthetic process	GO:2001141	8	5.28e-08	4.96087	13	1617	18	11107	EVM0001325,EVM0015253,EVM0019979,EVM0009565,EVM0021373,EVM0008431,EVM0020140,EVM0023152,EVM0009976,EVM0019045,EVM0015722,EVM0013549,EVM0001290,	8.72e-07
lightcyan	Biological process	regulation of nucleic acid-templated transcription	GO:1903506	9	5.28e-08	4.96087	13	1617	18	11107	EVM0001325,EVM0015253,EVM0019979,EVM0009565,EVM0021373,EVM0008431,EVM0020140,EVM0023152,EVM0009976,EVM0019045,EVM0015722,EVM0013549,EVM0001290,	8.72e-07
lightcyan	Biological process	regulation of biological process	GO:0050789	3	5.63e-08	2.52489	18	4399	18	11107	EVM0023172,EVM0001325,EVM0019031,EVM0015253,EVM0019979,EVM0009565,EVM0021373,EVM0008431,EVM0020140,EVM0023152,EVM0010945,EVM0009976,EVM0025842,EVM0019045,EVM0015722,EVM0013549,EVM0008340,EVM0001290,	8.13e-07
lightcyan	Biological process	cellular macromolecule biosynthetic process	GO:0034645	6	6.15e-08	3.7549	15	2465	18	11107	EVM0001325,EVM0015253,EVM0019979,EVM0009565,EVM0021373,EVM0008431,EVM0020140,EVM0023152,EVM0010945,EVM0009976,EVM0025842,EVM0019045,EVM0015722,EVM0013549,EVM0001290,	8.35e-07
lightcyan	Biological process	DNA-templated transcription	GO:0006351	10	7.73e-08	4.80919	13	1668	18	11107	EVM0001325,EVM0015253,EVM0019979,EVM0009565,EVM0021373,EVM0008431,EVM0020140,EVM0023152,EVM0009976,EVM0019045,EVM0015722,EVM0013549,EVM0001290,	9.92e-07
lightcyan	Biological process	regulation of metabolic process	GO:0019222	4	8.42e-08	3.67295	15	2520	18	11107	EVM0001325,EVM0015253,EVM0019979,EVM0009565,EVM0021373,EVM0008431,EVM0020140,EVM0023152,EVM0010945,EVM0009976,EVM0025842,EVM0019045,EVM0015722,EVM0013549,EVM0001290,	1.02e-06
lightcyan	Biological process	cellular nitrogen compound biosynthetic process	GO:0044271	5	9.16e-08	3.65122	15	2535	18	11107	EVM0001325,EVM0015253,EVM0019979,EVM0009565,EVM0021373,EVM0008431,EVM0020140,EVM0023152,EVM0010945,EVM0009976,EVM0025842,EVM0019045,EVM0015722,EVM0013549,EVM0001290,	1.06e-06
lightcyan	Biological process	nucleic acid-templated transcription	GO:0097659	9	9.27e-08	4.73817	13	1693	18	11107	EVM0001325,EVM0015253,EVM0019979,EVM0009565,EVM0021373,EVM0008431,EVM0020140,EVM0023152,EVM0009976,EVM0019045,EVM0015722,EVM0013549,EVM0001290,	1.02e-06
lightcyan	Biological process	macromolecule biosynthetic process	GO:0009059	5	1.02e-07	3.62405	15	2554	18	11107	EVM0001325,EVM0015253,EVM0019979,EVM0009565,EVM0021373,EVM0008431,EVM0020140,EVM0023152,EVM0010945,EVM0009976,EVM0025842,EVM0019045,EVM0015722,EVM0013549,EVM0001290,	1.07e-06
lightcyan	Biological process	RNA biosynthetic process	GO:0032774	8	1.03e-07	4.69931	13	1707	18	11107	EVM0001325,EVM0015253,EVM0019979,EVM0009565,EVM0021373,EVM0008431,EVM0020140,EVM0023152,EVM0009976,EVM0019045,EVM0015722,EVM0013549,EVM0001290,	1.03e-06
lightcyan	Biological process	gene expression	GO:0010467	5	4.21e-07	3.27872	15	2823	18	11107	EVM0001325,EVM0015253,EVM0019979,EVM0009565,EVM0021373,EVM0008431,EVM0020140,EVM0023152,EVM0010945,EVM0009976,EVM0025842,EVM0019045,EVM0015722,EVM0013549,EVM0001290,	4.05e-06
lightcyan	Biological process	biological regulation	GO:0065007	2	4.3e-07	2.25569	18	4924	18	11107	EVM0023172,EVM0001325,EVM0019031,EVM0015253,EVM0019979,EVM0009565,EVM0021373,EVM0008431,EVM0020140,EVM0023152,EVM0010945,EVM0009976,EVM0025842,EVM0019045,EVM0015722,EVM0013549,EVM0008340,EVM0001290,	3.97e-06
lightcyan	Biological process	nucleobase-containing compound biosynthetic process	GO:0034654	6	5.53e-07	4.09063	13	1961	18	11107	EVM0001325,EVM0015253,EVM0019979,EVM0009565,EVM0021373,EVM0008431,EVM0020140,EVM0023152,EVM0009976,EVM0019045,EVM0015722,EVM0013549,EVM0001290,	4.91e-06
lightcyan	Biological process	RNA metabolic process	GO:0016070	7	6e-07	3.19718	15	2895	18	11107	EVM0001325,EVM0015253,EVM0019979,EVM0009565,EVM0021373,EVM0008431,EVM0020140,EVM0023152,EVM0010945,EVM0009976,EVM0025842,EVM0019045,EVM0015722,EVM0013549,EVM0001290,	5.13e-06
lightcyan	Biological process	heterocycle biosynthetic process	GO:0018130	5	1.81e-06	3.70518	13	2165	18	11107	EVM0001325,EVM0015253,EVM0019979,EVM0009565,EVM0021373,EVM0008431,EVM0020140,EVM0023152,EVM0009976,EVM0019045,EVM0015722,EVM0013549,EVM0001290,	1.5e-05
lightcyan	Biological process	aromatic compound biosynthetic process	GO:0019438	5	2.76e-06	3.57634	13	2243	18	11107	EVM0001325,EVM0015253,EVM0019979,EVM0009565,EVM0021373,EVM0008431,EVM0020140,EVM0023152,EVM0009976,EVM0019045,EVM0015722,EVM0013549,EVM0001290,	2.2e-05
lightcyan	Biological process	nucleic acid metabolic process	GO:0090304	6	3.09e-06	2.84357	15	3255	18	11107	EVM0001325,EVM0015253,EVM0019979,EVM0009565,EVM0021373,EVM0008431,EVM0020140,EVM0023152,EVM0010945,EVM0009976,EVM0025842,EVM0019045,EVM0015722,EVM0013549,EVM0001290,	2.38e-05
lightcyan	Biological process	organic cyclic compound biosynthetic process	GO:1901362	5	4.56e-06	3.42809	13	2340	18	11107	EVM0001325,EVM0015253,EVM0019979,EVM0009565,EVM0021373,EVM0008431,EVM0020140,EVM0023152,EVM0009976,EVM0019045,EVM0015722,EVM0013549,EVM0001290,	3.4e-05
lightcyan	Biological process	cellular biosynthetic process	GO:0044249	4	9.71e-06	2.6176	15	3536	18	11107	EVM0001325,EVM0015253,EVM0019979,EVM0009565,EVM0021373,EVM0008431,EVM0020140,EVM0023152,EVM0010945,EVM0009976,EVM0025842,EVM0019045,EVM0015722,EVM0013549,EVM0001290,	7.01e-05
lightcyan	Biological process	nucleobase-containing compound metabolic process	GO:0006139	5	9.86e-06	2.61464	15	3540	18	11107	EVM0001325,EVM0015253,EVM0019979,EVM0009565,EVM0021373,EVM0008431,EVM0020140,EVM0023152,EVM0010945,EVM0009976,EVM0025842,EVM0019045,EVM0015722,EVM0013549,EVM0001290,	6.9e-05
lightcyan	Biological process	organic substance biosynthetic process	GO:1901576	4	1.46e-05	2.54072	15	3643	18	11107	EVM0001325,EVM0015253,EVM0019979,EVM0009565,EVM0021373,EVM0008431,EVM0020140,EVM0023152,EVM0010945,EVM0009976,EVM0025842,EVM0019045,EVM0015722,EVM0013549,EVM0001290,	9.94e-05
lightcyan	Biological process	biosynthetic process	GO:0009058	3	2.32e-05	2.45643	15	3768	18	11107	EVM0001325,EVM0015253,EVM0019979,EVM0009565,EVM0021373,EVM0008431,EVM0020140,EVM0023152,EVM0010945,EVM0009976,EVM0025842,EVM0019045,EVM0015722,EVM0013549,EVM0001290,	0.000153065
lightcyan	Biological process	heterocycle metabolic process	GO:0046483	4	2.54e-05	2.44024	15	3793	18	11107	EVM0001325,EVM0015253,EVM0019979,EVM0009565,EVM0021373,EVM0008431,EVM0020140,EVM0023152,EVM0010945,EVM0009976,EVM0025842,EVM0019045,EVM0015722,EVM0013549,EVM0001290,	0.000162849
lightcyan	Biological process	cellular aromatic compound metabolic process	GO:0006725	4	3.92e-05	2.36359	15	3916	18	11107	EVM0001325,EVM0015253,EVM0019979,EVM0009565,EVM0021373,EVM0008431,EVM0020140,EVM0023152,EVM0010945,EVM0009976,EVM0025842,EVM0019045,EVM0015722,EVM0013549,EVM0001290,	0.000244467
lightcyan	Biological process	organic cyclic compound metabolic process	GO:1901360	4	5.58e-05	2.30245	15	4020	18	11107	EVM0001325,EVM0015253,EVM0019979,EVM0009565,EVM0021373,EVM0008431,EVM0020140,EVM0023152,EVM0010945,EVM0009976,EVM0025842,EVM0019045,EVM0015722,EVM0013549,EVM0001290,	0.000339308
lightcyan	Biological process	cellular nitrogen compound metabolic process	GO:0034641	4	7.09e-05	2.26193	15	4092	18	11107	EVM0001325,EVM0015253,EVM0019979,EVM0009565,EVM0021373,EVM0008431,EVM0020140,EVM0023152,EVM0010945,EVM0009976,EVM0025842,EVM0019045,EVM0015722,EVM0013549,EVM0001290,	0.000419943
lightcyan	Biological process	cellular macromolecule metabolic process	GO:0044260	5	0.000172813	2.1161	15	4374	18	11107	EVM0001325,EVM0015253,EVM0019979,EVM0009565,EVM0021373,EVM0008431,EVM0020140,EVM0023152,EVM0010945,EVM0009976,EVM0025842,EVM0019045,EVM0015722,EVM0013549,EVM0001290,	0.000973652
lightcyan	Biological process	positive regulation of RNA metabolic process	GO:0051254	8	0.00112744	5.94466	5	519	18	11107	EVM0015253,EVM0019979,EVM0010945,EVM0025842,EVM0015722,	0.00578755
lightcyan	Biological process	positive regulation of nucleobase-containing compound metabolic process	GO:0045935	7	0.00155977	5.52917	5	558	18	11107	EVM0015253,EVM0019979,EVM0010945,EVM0025842,EVM0015722,	0.00766611
lightcyan	Biological process	macromolecule metabolic process	GO:0043170	4	0.00416257	1.65253	15	5601	18	11107	EVM0001325,EVM0015253,EVM0019979,EVM0009565,EVM0021373,EVM0008431,EVM0020140,EVM0023152,EVM0010945,EVM0009976,EVM0025842,EVM0019045,EVM0015722,EVM0013549,EVM0001290,	0.0178066
lightcyan	Biological process	positive regulation of nitrogen compound metabolic process	GO:0051173	6	0.00467506	4.30304	5	717	18	11107	EVM0015253,EVM0019979,EVM0010945,EVM0025842,EVM0015722,	0.0196353
lightcyan	Biological process	positive regulation of cellular metabolic process	GO:0031325	6	0.00582865	4.08646	5	755	18	11107	EVM0015253,EVM0019979,EVM0010945,EVM0025842,EVM0015722,	0.0224403
lightcyan	Biological process	positive regulation of macromolecule metabolic process	GO:0010604	6	0.00651192	3.981	5	775	18	11107	EVM0015253,EVM0019979,EVM0010945,EVM0025842,EVM0015722,	0.0242621
lightcyan	Biological process	positive regulation of metabolic process	GO:0009893	5	0.00982556	3.60851	5	855	18	11107	EVM0015253,EVM0019979,EVM0010945,EVM0025842,EVM0015722,	0.0324243
lightcyan	Biological process	nitrogen compound metabolic process	GO:0006807	3	0.00984039	1.53982	15	6011	18	11107	EVM0001325,EVM0015253,EVM0019979,EVM0009565,EVM0021373,EVM0008431,EVM0020140,EVM0023152,EVM0010945,EVM0009976,EVM0025842,EVM0019045,EVM0015722,EVM0013549,EVM0001290,	0.0320159
lightcyan	Biological process	positive regulation of cellular process	GO:0048522	5	0.0251823	2.85674	5	1080	18	11107	EVM0015253,EVM0019979,EVM0010945,EVM0025842,EVM0015722,	0.0709405
lightcyan	Biological process	primary metabolic process	GO:0044238	3	0.0320092	1.39144	15	6652	18	11107	EVM0001325,EVM0015253,EVM0019979,EVM0009565,EVM0021373,EVM0008431,EVM0020140,EVM0023152,EVM0010945,EVM0009976,EVM0025842,EVM0019045,EVM0015722,EVM0013549,EVM0001290,	0.0859781
red	Molecular function	transcription regulator activity	GO:0140110	2	0	7.15083	80	1221	86	9386	EVM0025699,EVM0025734,EVM0021135,EVM0008792,EVM0012940,EVM0005163,EVM0005681,EVM0006891,EVM0008673,EVM0008277,EVM0007238,EVM0026134,EVM0025684,EVM0017265,EVM0010074,EVM0015765,EVM0010352,EVM0015521,EVM0021884,EVM0017545,EVM0021089,EVM0011600,EVM0010632,EVM0006386,EVM0021481,EVM0010756,EVM0025950,EVM0026248,EVM0007609,EVM0018743,EVM0014147,EVM0018624,EVM0020263,EVM0015916,EVM0027320,EVM0000387,EVM…	0
red	Molecular function	DNA binding	GO:0003677	5	0	4.52392	40	965	86	9386	EVM0025699,EVM0021135,EVM0012940,EVM0005163,EVM0005681,EVM0026134,EVM0025684,EVM0010074,EVM0010352,EVM0021884,EVM0021089,EVM0010632,EVM0010756,EVM0025950,EVM0026248,EVM0007609,EVM0018743,EVM0014147,EVM0015916,EVM0019959,EVM0027320,EVM0011660,EVM0021743,EVM0012912,EVM0001721,EVM0009201,EVM0015283,EVM0018557,EVM0010797,EVM0005465,EVM0001825,EVM0014460,EVM0009828,EVM0027373,EVM0005116,EVM0005239,EVM…	0
red	Molecular function	DNA-binding transcription factor activity	GO:0003700	3	0	7.52358	79	1146	86	9386	EVM0025699,EVM0025734,EVM0021135,EVM0008792,EVM0012940,EVM0005163,EVM0005681,EVM0006891,EVM0008673,EVM0008277,EVM0007238,EVM0026134,EVM0025684,EVM0017265,EVM0010074,EVM0015765,EVM0010352,EVM0015521,EVM0021884,EVM0017545,EVM0021089,EVM0011600,EVM0010632,EVM0006386,EVM0021481,EVM0010756,EVM0025950,EVM0026248,EVM0007609,EVM0018743,EVM0014147,EVM0018624,EVM0020263,EVM0015916,EVM0027320,EVM0000387,EVM…	0
red	Molecular function	sequence-specific DNA binding	GO:0043565	6	5.4e-13	4.88945	28	625	86	9386	EVM0021135,EVM0012940,EVM0005163,EVM0005681,EVM0026134,EVM0010074,EVM0010352,EVM0021089,EVM0010632,EVM0025950,EVM0026248,EVM0007609,EVM0018743,EVM0014147,EVM0015916,EVM0027320,EVM0011660,EVM0021743,EVM0012912,EVM0009201,EVM0015283,EVM0018557,EVM0010797,EVM0001825,EVM0009828,EVM0005239,EVM0019346,EVM0011989,	7.7e-12
red	Molecular function	sequence-specific double-stranded DNA binding	GO:1990837	7	2.83e-08	5.04177	17	368	86	9386	EVM0021135,EVM0012940,EVM0010074,EVM0010352,EVM0010632,EVM0025950,EVM0026248,EVM0007609,EVM0014147,EVM0015916,EVM0027320,EVM0009201,EVM0015283,EVM0010797,EVM0001825,EVM0009828,EVM0005239,	3.23e-07
red	Molecular function	transcription regulatory region nucleic acid binding	GO:0001067	5	5.26e-08	5.1817	16	337	86	9386	EVM0021135,EVM0010074,EVM0010352,EVM0010632,EVM0025950,EVM0026248,EVM0007609,EVM0014147,EVM0015916,EVM0027320,EVM0009201,EVM0015283,EVM0010797,EVM0001825,EVM0009828,EVM0005239,	4.99e-07
red	Molecular function	transcription cis-regulatory region binding	GO:0000976	8	5.26e-08	5.1817	16	337	86	9386	EVM0021135,EVM0010074,EVM0010352,EVM0010632,EVM0025950,EVM0026248,EVM0007609,EVM0014147,EVM0015916,EVM0027320,EVM0009201,EVM0015283,EVM0010797,EVM0001825,EVM0009828,EVM0005239,	4.99e-07
red	Molecular function	nucleic acid binding	GO:0003676	4	4.9e-07	2.0928	40	2086	86	9386	EVM0025699,EVM0021135,EVM0012940,EVM0005163,EVM0005681,EVM0026134,EVM0025684,EVM0010074,EVM0010352,EVM0021884,EVM0021089,EVM0010632,EVM0010756,EVM0025950,EVM0026248,EVM0007609,EVM0018743,EVM0014147,EVM0015916,EVM0019959,EVM0027320,EVM0011660,EVM0021743,EVM0012912,EVM0001721,EVM0009201,EVM0015283,EVM0018557,EVM0010797,EVM0005465,EVM0001825,EVM0014460,EVM0009828,EVM0027373,EVM0005116,EVM0005239,EVM…	3.49e-06
red	Molecular function	double-stranded DNA binding	GO:0003690	6	5.82e-07	4.08672	17	454	86	9386	EVM0021135,EVM0012940,EVM0010074,EVM0010352,EVM0010632,EVM0025950,EVM0026248,EVM0007609,EVM0014147,EVM0015916,EVM0027320,EVM0009201,EVM0015283,EVM0010797,EVM0001825,EVM0009828,EVM0005239,	3.69e-06
red	Molecular function	heterocyclic compound binding	GO:1901363	3	2.45e-05	1.80545	40	2418	86	9386	EVM0025699,EVM0021135,EVM0012940,EVM0005163,EVM0005681,EVM0026134,EVM0025684,EVM0010074,EVM0010352,EVM0021884,EVM0021089,EVM0010632,EVM0010756,EVM0025950,EVM0026248,EVM0007609,EVM0018743,EVM0014147,EVM0015916,EVM0019959,EVM0027320,EVM0011660,EVM0021743,EVM0012912,EVM0001721,EVM0009201,EVM0015283,EVM0018557,EVM0010797,EVM0005465,EVM0001825,EVM0014460,EVM0009828,EVM0027373,EVM0005116,EVM0005239,EVM…	0.000139452
red	Molecular function	organic cyclic compound binding	GO:0097159	3	2.66e-05	1.7995	40	2426	86	9386	EVM0025699,EVM0021135,EVM0012940,EVM0005163,EVM0005681,EVM0026134,EVM0025684,EVM0010074,EVM0010352,EVM0021884,EVM0021089,EVM0010632,EVM0010756,EVM0025950,EVM0026248,EVM0007609,EVM0018743,EVM0014147,EVM0015916,EVM0019959,EVM0027320,EVM0011660,EVM0021743,EVM0012912,EVM0001721,EVM0009201,EVM0015283,EVM0018557,EVM0010797,EVM0005465,EVM0001825,EVM0014460,EVM0009828,EVM0027373,EVM0005116,EVM0005239,EVM…	0.000137719
red	Molecular function	DNA-binding transcription factor activity, RNA polymerase II-specific	GO:0000981	4	0.000450673	5.05945	7	151	86	9386	EVM0021135,EVM0010632,EVM0007609,EVM0014147,EVM0012912,EVM0009201,EVM0009828,	0.0021407
red	Molecular function	transcription factor binding	GO:0008134	4	0.000521126	5.89943	6	111	86	9386	EVM0007238,EVM0025684,EVM0010632,EVM0007609,EVM0009201,EVM0003978,	0.00228494
red	Molecular function	protein dimerization activity	GO:0046983	4	0.000722737	3.67886	9	267	86	9386	EVM0025684,EVM0021884,EVM0026248,EVM0018743,EVM0019959,EVM0021743,EVM0008642,EVM0005116,EVM0003978,	0.00294257
red	Cellular component	nucleus	GO:0005634	6	3.33e-16	3.08455	63	3448	66	11142	EVM0008317,EVM0026663,EVM0025699,EVM0025974,EVM0021135,EVM0008792,EVM0012940,EVM0005163,EVM0006891,EVM0008673,EVM0007238,EVM0025684,EVM0027503,EVM0017265,EVM0010074,EVM0015765,EVM0015521,EVM0021884,EVM0017545,EVM0010632,EVM0006386,EVM0010756,EVM0026248,EVM0007609,EVM0018743,EVM0014147,EVM0015916,EVM0019959,EVM0027320,EVM0013563,EVM0021743,EVM0005030,EVM0014937,EVM0012912,EVM0009201,EVM0008992,EVM…	1.03e-14
red	Cellular component	intracellular membrane-bounded organelle	GO:0043231	5	4.61e-08	1.3699	64	7887	66	11142	EVM0008317,EVM0026663,EVM0025699,EVM0025974,EVM0021135,EVM0008792,EVM0012940,EVM0005163,EVM0006891,EVM0008673,EVM0007238,EVM0025684,EVM0027503,EVM0017265,EVM0010074,EVM0015765,EVM0015521,EVM0021884,EVM0017545,EVM0010632,EVM0006386,EVM0010756,EVM0025950,EVM0026248,EVM0007609,EVM0018743,EVM0014147,EVM0015916,EVM0019959,EVM0027320,EVM0013563,EVM0021743,EVM0005030,EVM0014937,EVM0012912,EVM0009201,EVM…	7.15e-07
red	Cellular component	membrane-bounded organelle	GO:0043227	4	5.83e-08	1.36453	64	7918	66	11142	EVM0008317,EVM0026663,EVM0025699,EVM0025974,EVM0021135,EVM0008792,EVM0012940,EVM0005163,EVM0006891,EVM0008673,EVM0007238,EVM0025684,EVM0027503,EVM0017265,EVM0010074,EVM0015765,EVM0015521,EVM0021884,EVM0017545,EVM0010632,EVM0006386,EVM0010756,EVM0025950,EVM0026248,EVM0007609,EVM0018743,EVM0014147,EVM0015916,EVM0019959,EVM0027320,EVM0013563,EVM0021743,EVM0005030,EVM0014937,EVM0012912,EVM0009201,EVM…	6.02e-07
red	Cellular component	intracellular organelle	GO:0043229	4	4.14e-07	1.32018	64	8184	66	11142	EVM0008317,EVM0026663,EVM0025699,EVM0025974,EVM0021135,EVM0008792,EVM0012940,EVM0005163,EVM0006891,EVM0008673,EVM0007238,EVM0025684,EVM0027503,EVM0017265,EVM0010074,EVM0015765,EVM0015521,EVM0021884,EVM0017545,EVM0010632,EVM0006386,EVM0010756,EVM0025950,EVM0026248,EVM0007609,EVM0018743,EVM0014147,EVM0015916,EVM0019959,EVM0027320,EVM0013563,EVM0021743,EVM0005030,EVM0014937,EVM0012912,EVM0009201,EVM…	3.21e-06
red	Cellular component	organelle	GO:0043226	3	4.95e-07	1.31616	64	8209	66	11142	EVM0008317,EVM0026663,EVM0025699,EVM0025974,EVM0021135,EVM0008792,EVM0012940,EVM0005163,EVM0006891,EVM0008673,EVM0007238,EVM0025684,EVM0027503,EVM0017265,EVM0010074,EVM0015765,EVM0015521,EVM0021884,EVM0017545,EVM0010632,EVM0006386,EVM0010756,EVM0025950,EVM0026248,EVM0007609,EVM0018743,EVM0014147,EVM0015916,EVM0019959,EVM0027320,EVM0013563,EVM0021743,EVM0005030,EVM0014937,EVM0012912,EVM0009201,EVM…	3.07e-06
red	Cellular component	obsolete intracellular part	GO:0044424	0	7.66e-05	1.18309	65	9275	66	11142	EVM0008317,EVM0026663,EVM0025699,EVM0025974,EVM0005607,EVM0021135,EVM0008792,EVM0012940,EVM0005163,EVM0006891,EVM0008673,EVM0007238,EVM0025684,EVM0027503,EVM0017265,EVM0010074,EVM0015765,EVM0015521,EVM0021884,EVM0017545,EVM0010632,EVM0006386,EVM0010756,EVM0025950,EVM0026248,EVM0007609,EVM0018743,EVM0014147,EVM0015916,EVM0019959,EVM0027320,EVM0013563,EVM0021743,EVM0005030,EVM0014937,EVM0012912,EVM…	0.000395541
red	Cellular component	intracellular anatomical structure	GO:0005622	3	9.68e-05	1.17852	65	9311	66	11142	EVM0008317,EVM0026663,EVM0025699,EVM0025974,EVM0005607,EVM0021135,EVM0008792,EVM0012940,EVM0005163,EVM0006891,EVM0008673,EVM0007238,EVM0025684,EVM0027503,EVM0017265,EVM0010074,EVM0015765,EVM0015521,EVM0021884,EVM0017545,EVM0010632,EVM0006386,EVM0010756,EVM0025950,EVM0026248,EVM0007609,EVM0018743,EVM0014147,EVM0015916,EVM0019959,EVM0027320,EVM0013563,EVM0021743,EVM0005030,EVM0014937,EVM0012912,EVM…	0.000428783
red	Biological process	regulation of RNA metabolic process	GO:0051252	7	0	5.97055	81	1732	87	11107	EVM0025699,EVM0025734,EVM0021135,EVM0008792,EVM0012940,EVM0005163,EVM0005681,EVM0006891,EVM0008673,EVM0008277,EVM0007238,EVM0026134,EVM0025684,EVM0017265,EVM0010074,EVM0015765,EVM0010352,EVM0015521,EVM0021884,EVM0017545,EVM0021089,EVM0011600,EVM0010632,EVM0006386,EVM0021481,EVM0010756,EVM0025950,EVM0026248,EVM0007609,EVM0018743,EVM0014147,EVM0018624,EVM0020263,EVM0015916,EVM0027320,EVM0000387,EVM…	0
red	Biological process	macromolecule metabolic process	GO:0043170	4	0	1.89186	83	5601	87	11107	EVM0026663,EVM0025699,EVM0025734,EVM0021135,EVM0008792,EVM0012940,EVM0005163,EVM0005681,EVM0006891,EVM0008673,EVM0008277,EVM0007238,EVM0026134,EVM0025684,EVM0017265,EVM0010074,EVM0015765,EVM0010352,EVM0015521,EVM0021884,EVM0017545,EVM0021089,EVM0011600,EVM0010632,EVM0006386,EVM0021481,EVM0010756,EVM0025950,EVM0026248,EVM0007609,EVM0018743,EVM0014147,EVM0018624,EVM0020263,EVM0015916,EVM0027320,EVM…	0
red	Biological process	nucleic acid metabolic process	GO:0090304	6	0	3.17696	81	3255	87	11107	EVM0025699,EVM0025734,EVM0021135,EVM0008792,EVM0012940,EVM0005163,EVM0005681,EVM0006891,EVM0008673,EVM0008277,EVM0007238,EVM0026134,EVM0025684,EVM0017265,EVM0010074,EVM0015765,EVM0010352,EVM0015521,EVM0021884,EVM0017545,EVM0021089,EVM0011600,EVM0010632,EVM0006386,EVM0021481,EVM0010756,EVM0025950,EVM0026248,EVM0007609,EVM0018743,EVM0014147,EVM0018624,EVM0020263,EVM0015916,EVM0027320,EVM0000387,EVM…	0
red	Biological process	DNA-templated transcription	GO:0006351	10	0	6.1231	80	1668	87	11107	EVM0025699,EVM0025734,EVM0021135,EVM0008792,EVM0012940,EVM0005163,EVM0005681,EVM0006891,EVM0008673,EVM0008277,EVM0007238,EVM0026134,EVM0025684,EVM0017265,EVM0010074,EVM0015765,EVM0010352,EVM0015521,EVM0021884,EVM0017545,EVM0021089,EVM0011600,EVM0010632,EVM0006386,EVM0021481,EVM0010756,EVM0025950,EVM0026248,EVM0007609,EVM0018743,EVM0014147,EVM0018624,EVM0020263,EVM0015916,EVM0027320,EVM0000387,EVM…	0
red	Biological process	regulation of DNA-templated transcription	GO:0006355	10	0	6.43157	80	1588	87	11107	EVM0025699,EVM0025734,EVM0021135,EVM0008792,EVM0012940,EVM0005163,EVM0005681,EVM0006891,EVM0008673,EVM0008277,EVM0007238,EVM0026134,EVM0025684,EVM0017265,EVM0010074,EVM0015765,EVM0010352,EVM0015521,EVM0021884,EVM0017545,EVM0021089,EVM0011600,EVM0010632,EVM0006386,EVM0021481,EVM0010756,EVM0025950,EVM0026248,EVM0007609,EVM0018743,EVM0014147,EVM0018624,EVM0020263,EVM0015916,EVM0027320,EVM0000387,EVM…	0
red	Biological process	cellular biosynthetic process	GO:0044249	4	0	2.9606	82	3536	87	11107	EVM0026663,EVM0025699,EVM0025734,EVM0021135,EVM0008792,EVM0012940,EVM0005163,EVM0005681,EVM0006891,EVM0008673,EVM0008277,EVM0007238,EVM0026134,EVM0025684,EVM0017265,EVM0010074,EVM0015765,EVM0010352,EVM0015521,EVM0021884,EVM0017545,EVM0021089,EVM0011600,EVM0010632,EVM0006386,EVM0021481,EVM0010756,EVM0025950,EVM0026248,EVM0007609,EVM0018743,EVM0014147,EVM0018624,EVM0020263,EVM0015916,EVM0027320,EVM…	0
red	Biological process	gene expression	GO:0010467	5	0	3.66312	81	2823	87	11107	EVM0025699,EVM0025734,EVM0021135,EVM0008792,EVM0012940,EVM0005163,EVM0005681,EVM0006891,EVM0008673,EVM0008277,EVM0007238,EVM0026134,EVM0025684,EVM0017265,EVM0010074,EVM0015765,EVM0010352,EVM0015521,EVM0021884,EVM0017545,EVM0021089,EVM0011600,EVM0010632,EVM0006386,EVM0021481,EVM0010756,EVM0025950,EVM0026248,EVM0007609,EVM0018743,EVM0014147,EVM0018624,EVM0020263,EVM0015916,EVM0027320,EVM0000387,EVM…	0
red	Biological process	cellular macromolecule metabolic process	GO:0044260	5	0	2.39339	82	4374	87	11107	EVM0026663,EVM0025699,EVM0025734,EVM0021135,EVM0008792,EVM0012940,EVM0005163,EVM0005681,EVM0006891,EVM0008673,EVM0008277,EVM0007238,EVM0026134,EVM0025684,EVM0017265,EVM0010074,EVM0015765,EVM0010352,EVM0015521,EVM0021884,EVM0017545,EVM0021089,EVM0011600,EVM0010632,EVM0006386,EVM0021481,EVM0010756,EVM0025950,EVM0026248,EVM0007609,EVM0018743,EVM0014147,EVM0018624,EVM0020263,EVM0015916,EVM0027320,EVM…	0
red	Biological process	regulation of gene expression	GO:0010468	6	0	5.17655	80	1973	87	11107	EVM0025699,EVM0025734,EVM0021135,EVM0008792,EVM0012940,EVM0005163,EVM0005681,EVM0006891,EVM0008673,EVM0008277,EVM0007238,EVM0026134,EVM0025684,EVM0017265,EVM0010074,EVM0015765,EVM0010352,EVM0015521,EVM0021884,EVM0017545,EVM0021089,EVM0011600,EVM0010632,EVM0006386,EVM0021481,EVM0010756,EVM0025950,EVM0026248,EVM0007609,EVM0018743,EVM0014147,EVM0018624,EVM0020263,EVM0015916,EVM0027320,EVM0000387,EVM…	0
red	Biological process	regulation of RNA biosynthetic process	GO:2001141	8	0	6.39518	81	1617	87	11107	EVM0025699,EVM0025734,EVM0021135,EVM0008792,EVM0012940,EVM0005163,EVM0005681,EVM0006891,EVM0008673,EVM0008277,EVM0007238,EVM0026134,EVM0025684,EVM0017265,EVM0010074,EVM0015765,EVM0010352,EVM0015521,EVM0021884,EVM0017545,EVM0021089,EVM0011600,EVM0010632,EVM0006386,EVM0021481,EVM0010756,EVM0025950,EVM0026248,EVM0007609,EVM0018743,EVM0014147,EVM0018624,EVM0020263,EVM0015916,EVM0027320,EVM0000387,EVM…	0
red	Biological process	regulation of cellular macromolecule biosynthetic process	GO:2000112	7	0	5.81294	80	1757	87	11107	EVM0025699,EVM0025734,EVM0021135,EVM0008792,EVM0012940,EVM0005163,EVM0005681,EVM0006891,EVM0008673,EVM0008277,EVM0007238,EVM0026134,EVM0025684,EVM0017265,EVM0010074,EVM0015765,EVM0010352,EVM0015521,EVM0021884,EVM0017545,EVM0021089,EVM0011600,EVM0010632,EVM0006386,EVM0021481,EVM0010756,EVM0025950,EVM0026248,EVM0007609,EVM0018743,EVM0014147,EVM0018624,EVM0020263,EVM0015916,EVM0027320,EVM0000387,EVM…	0
red	Biological process	cellular nitrogen compound biosynthetic process	GO:0044271	5	0	4.07929	81	2535	87	11107	EVM0025699,EVM0025734,EVM0021135,EVM0008792,EVM0012940,EVM0005163,EVM0005681,EVM0006891,EVM0008673,EVM0008277,EVM0007238,EVM0026134,EVM0025684,EVM0017265,EVM0010074,EVM0015765,EVM0010352,EVM0015521,EVM0021884,EVM0017545,EVM0021089,EVM0011600,EVM0010632,EVM0006386,EVM0021481,EVM0010756,EVM0025950,EVM0026248,EVM0007609,EVM0018743,EVM0014147,EVM0018624,EVM0020263,EVM0015916,EVM0027320,EVM0000387,EVM…	0
red	Biological process	shoot system development	GO:0048367	5	0	6.29343	42	852	87	11107	EVM0025699,EVM0025734,EVM0006891,EVM0008277,EVM0007238,EVM0026134,EVM0025684,EVM0015521,EVM0021884,EVM0017545,EVM0021089,EVM0006386,EVM0010756,EVM0014147,EVM0015916,EVM0019959,EVM0000387,EVM0000946,EVM0021743,EVM0014937,EVM0008992,EVM0012868,EVM0024791,EVM0008642,EVM0004603,EVM0016132,EVM0005348,EVM0005465,EVM0001825,EVM0009828,EVM0011078,EVM0027373,EVM0005116,EVM0005239,EVM0003978,EVM0024779,EVM…	0
red	Biological process	floral organ development	GO:0048437	5	0	11.5109	22	244	87	11107	EVM0025699,EVM0025734,EVM0025684,EVM0021884,EVM0010756,EVM0014147,EVM0015916,EVM0019959,EVM0014937,EVM0024791,EVM0004603,EVM0016132,EVM0005348,EVM0005465,EVM0001825,EVM0009828,EVM0011078,EVM0027373,EVM0005116,EVM0003978,EVM0020576,EVM0015423,	0
red	Biological process	regulation of macromolecule biosynthetic process	GO:0010556	6	0	5.761	81	1795	87	11107	EVM0025699,EVM0025734,EVM0021135,EVM0008792,EVM0012940,EVM0005163,EVM0005681,EVM0006891,EVM0008673,EVM0008277,EVM0007238,EVM0026134,EVM0025684,EVM0017265,EVM0010074,EVM0015765,EVM0010352,EVM0015521,EVM0021884,EVM0017545,EVM0021089,EVM0011600,EVM0010632,EVM0006386,EVM0021481,EVM0010756,EVM0025950,EVM0026248,EVM0007609,EVM0018743,EVM0014147,EVM0018624,EVM0020263,EVM0015916,EVM0027320,EVM0000387,EVM…	0
red	Biological process	floral organ morphogenesis	GO:0048444	6	0	28.1618	15	68	87	11107	EVM0025699,EVM0025734,EVM0025684,EVM0021884,EVM0010756,EVM0014937,EVM0024791,EVM0004603,EVM0005348,EVM0011078,EVM0027373,EVM0005116,EVM0003978,EVM0020576,EVM0015423,	0
red	Biological process	floral organ formation	GO:0048449	5	0	41.6304	15	46	87	11107	EVM0025699,EVM0025734,EVM0025684,EVM0021884,EVM0010756,EVM0014937,EVM0024791,EVM0004603,EVM0005348,EVM0011078,EVM0027373,EVM0005116,EVM0003978,EVM0020576,EVM0015423,	0
red	Biological process	heterocycle metabolic process	GO:0046483	4	0	2.72634	81	3793	87	11107	EVM0025699,EVM0025734,EVM0021135,EVM0008792,EVM0012940,EVM0005163,EVM0005681,EVM0006891,EVM0008673,EVM0008277,EVM0007238,EVM0026134,EVM0025684,EVM0017265,EVM0010074,EVM0015765,EVM0010352,EVM0015521,EVM0021884,EVM0017545,EVM0021089,EVM0011600,EVM0010632,EVM0006386,EVM0021481,EVM0010756,EVM0025950,EVM0026248,EVM0007609,EVM0018743,EVM0014147,EVM0018624,EVM0020263,EVM0015916,EVM0027320,EVM0000387,EVM…	0
red	Biological process	reproductive shoot system development	GO:0090567	6	0	8.33193	31	475	87	11107	EVM0025699,EVM0025734,EVM0007238,EVM0026134,EVM0025684,EVM0015521,EVM0021884,EVM0017545,EVM0010756,EVM0014147,EVM0015916,EVM0019959,EVM0014937,EVM0008992,EVM0012868,EVM0024791,EVM0008642,EVM0004603,EVM0016132,EVM0005348,EVM0005465,EVM0001825,EVM0009828,EVM0011078,EVM0027373,EVM0005116,EVM0003978,EVM0016354,EVM0020576,EVM0019346,EVM0015423,	0
red	Biological process	cellular aromatic compound metabolic process	GO:0006725	4	0	2.6407	81	3916	87	11107	EVM0025699,EVM0025734,EVM0021135,EVM0008792,EVM0012940,EVM0005163,EVM0005681,EVM0006891,EVM0008673,EVM0008277,EVM0007238,EVM0026134,EVM0025684,EVM0017265,EVM0010074,EVM0015765,EVM0010352,EVM0015521,EVM0021884,EVM0017545,EVM0021089,EVM0011600,EVM0010632,EVM0006386,EVM0021481,EVM0010756,EVM0025950,EVM0026248,EVM0007609,EVM0018743,EVM0014147,EVM0018624,EVM0020263,EVM0015916,EVM0027320,EVM0000387,EVM…	0
red	Biological process	specification of plant organ identity	GO:0090701	5	0	57.6559	14	31	87	11107	EVM0025699,EVM0025684,EVM0021884,EVM0010756,EVM0014937,EVM0024791,EVM0004603,EVM0005348,EVM0011078,EVM0027373,EVM0005116,EVM0003978,EVM0020576,EVM0015423,	0
red	Biological process	regulation of cellular metabolic process	GO:0031323	5	0	4.54549	81	2275	87	11107	EVM0025699,EVM0025734,EVM0021135,EVM0008792,EVM0012940,EVM0005163,EVM0005681,EVM0006891,EVM0008673,EVM0008277,EVM0007238,EVM0026134,EVM0025684,EVM0017265,EVM0010074,EVM0015765,EVM0010352,EVM0015521,EVM0021884,EVM0017545,EVM0021089,EVM0011600,EVM0010632,EVM0006386,EVM0021481,EVM0010756,EVM0025950,EVM0026248,EVM0007609,EVM0018743,EVM0014147,EVM0018624,EVM0020263,EVM0015916,EVM0027320,EVM0000387,EVM…	0
red	Biological process	regulation of cellular biosynthetic process	GO:0031326	6	0	5.53587	81	1868	87	11107	EVM0025699,EVM0025734,EVM0021135,EVM0008792,EVM0012940,EVM0005163,EVM0005681,EVM0006891,EVM0008673,EVM0008277,EVM0007238,EVM0026134,EVM0025684,EVM0017265,EVM0010074,EVM0015765,EVM0010352,EVM0015521,EVM0021884,EVM0017545,EVM0021089,EVM0011600,EVM0010632,EVM0006386,EVM0021481,EVM0010756,EVM0025950,EVM0026248,EVM0007609,EVM0018743,EVM0014147,EVM0018624,EVM0020263,EVM0015916,EVM0027320,EVM0000387,EVM…	0
red	Biological process	regulation of biological process	GO:0050789	3	0	2.43783	84	4399	87	11107	EVM0026663,EVM0025699,EVM0025734,EVM0021135,EVM0008792,EVM0012940,EVM0005163,EVM0005681,EVM0006891,EVM0008673,EVM0008277,EVM0007238,EVM0026134,EVM0025684,EVM0017265,EVM0010074,EVM0015765,EVM0010352,EVM0015521,EVM0021884,EVM0017545,EVM0021089,EVM0011600,EVM0010632,EVM0006386,EVM0021481,EVM0010756,EVM0025950,EVM0026248,EVM0007609,EVM0018743,EVM0014147,EVM0018624,EVM0020263,EVM0015916,EVM0027320,EVM…	0
red	Biological process	regulation of cellular process	GO:0050794	4	0	2.6396	82	3966	87	11107	EVM0026663,EVM0025699,EVM0025734,EVM0021135,EVM0008792,EVM0012940,EVM0005163,EVM0005681,EVM0006891,EVM0008673,EVM0008277,EVM0007238,EVM0026134,EVM0025684,EVM0017265,EVM0010074,EVM0015765,EVM0010352,EVM0015521,EVM0021884,EVM0017545,EVM0021089,EVM0011600,EVM0010632,EVM0006386,EVM0021481,EVM0010756,EVM0025950,EVM0026248,EVM0007609,EVM0018743,EVM0014147,EVM0018624,EVM0020263,EVM0015916,EVM0027320,EVM…	0
red	Biological process	nitrogen compound metabolic process	GO:0006807	3	0	1.74158	82	6011	87	11107	EVM0025699,EVM0025734,EVM0021135,EVM0008792,EVM0012940,EVM0005163,EVM0005681,EVM0006891,EVM0008673,EVM0008277,EVM0007238,EVM0026134,EVM0025684,EVM0017265,EVM0010074,EVM0015765,EVM0010352,EVM0015521,EVM0021884,EVM0017545,EVM0021089,EVM0011600,EVM0010632,EVM0006386,EVM0021481,EVM0010756,EVM0025950,EVM0026248,EVM0007609,EVM0018743,EVM0014147,EVM0018624,EVM0020263,EVM0015916,EVM0027320,EVM0000387,EVM…	0
red	Biological process	regulation of biosynthetic process	GO:0009889	5	0	5.42265	81	1907	87	11107	EVM0025699,EVM0025734,EVM0021135,EVM0008792,EVM0012940,EVM0005163,EVM0005681,EVM0006891,EVM0008673,EVM0008277,EVM0007238,EVM0026134,EVM0025684,EVM0017265,EVM0010074,EVM0015765,EVM0010352,EVM0015521,EVM0021884,EVM0017545,EVM0021089,EVM0011600,EVM0010632,EVM0006386,EVM0021481,EVM0010756,EVM0025950,EVM0026248,EVM0007609,EVM0018743,EVM0014147,EVM0018624,EVM0020263,EVM0015916,EVM0027320,EVM0000387,EVM…	0
red	Biological process	flower development	GO:0009908	7	0	8.60362	31	460	87	11107	EVM0025699,EVM0025734,EVM0007238,EVM0026134,EVM0025684,EVM0015521,EVM0021884,EVM0017545,EVM0010756,EVM0014147,EVM0015916,EVM0019959,EVM0014937,EVM0008992,EVM0012868,EVM0024791,EVM0008642,EVM0004603,EVM0016132,EVM0005348,EVM0005465,EVM0001825,EVM0009828,EVM0011078,EVM0027373,EVM0005116,EVM0003978,EVM0016354,EVM0020576,EVM0019346,EVM0015423,	0
red	Biological process	RNA metabolic process	GO:0016070	7	0	3.57202	81	2895	87	11107	EVM0025699,EVM0025734,EVM0021135,EVM0008792,EVM0012940,EVM0005163,EVM0005681,EVM0006891,EVM0008673,EVM0008277,EVM0007238,EVM0026134,EVM0025684,EVM0017265,EVM0010074,EVM0015765,EVM0010352,EVM0015521,EVM0021884,EVM0017545,EVM0021089,EVM0011600,EVM0010632,EVM0006386,EVM0021481,EVM0010756,EVM0025950,EVM0026248,EVM0007609,EVM0018743,EVM0014147,EVM0018624,EVM0020263,EVM0015916,EVM0027320,EVM0000387,EVM…	0
red	Biological process	heterocycle biosynthetic process	GO:0018130	5	0	4.77644	81	2165	87	11107	EVM0025699,EVM0025734,EVM0021135,EVM0008792,EVM0012940,EVM0005163,EVM0005681,EVM0006891,EVM0008673,EVM0008277,EVM0007238,EVM0026134,EVM0025684,EVM0017265,EVM0010074,EVM0015765,EVM0010352,EVM0015521,EVM0021884,EVM0017545,EVM0021089,EVM0011600,EVM0010632,EVM0006386,EVM0021481,EVM0010756,EVM0025950,EVM0026248,EVM0007609,EVM0018743,EVM0014147,EVM0018624,EVM0020263,EVM0015916,EVM0027320,EVM0000387,EVM…	0
red	Biological process	regulation of nucleobase-containing compound metabolic process	GO:0019219	6	0	5.64465	81	1832	87	11107	EVM0025699,EVM0025734,EVM0021135,EVM0008792,EVM0012940,EVM0005163,EVM0005681,EVM0006891,EVM0008673,EVM0008277,EVM0007238,EVM0026134,EVM0025684,EVM0017265,EVM0010074,EVM0015765,EVM0010352,EVM0015521,EVM0021884,EVM0017545,EVM0021089,EVM0011600,EVM0010632,EVM0006386,EVM0021481,EVM0010756,EVM0025950,EVM0026248,EVM0007609,EVM0018743,EVM0014147,EVM0018624,EVM0020263,EVM0015916,EVM0027320,EVM0000387,EVM…	0
red	Biological process	regulation of metabolic process	GO:0019222	4	0	4.10357	81	2520	87	11107	EVM0025699,EVM0025734,EVM0021135,EVM0008792,EVM0012940,EVM0005163,EVM0005681,EVM0006891,EVM0008673,EVM0008277,EVM0007238,EVM0026134,EVM0025684,EVM0017265,EVM0010074,EVM0015765,EVM0010352,EVM0015521,EVM0021884,EVM0017545,EVM0021089,EVM0011600,EVM0010632,EVM0006386,EVM0021481,EVM0010756,EVM0025950,EVM0026248,EVM0007609,EVM0018743,EVM0014147,EVM0018624,EVM0020263,EVM0015916,EVM0027320,EVM0000387,EVM…	0
red	Biological process	organic cyclic compound biosynthetic process	GO:1901362	5	0	4.41923	81	2340	87	11107	EVM0025699,EVM0025734,EVM0021135,EVM0008792,EVM0012940,EVM0005163,EVM0005681,EVM0006891,EVM0008673,EVM0008277,EVM0007238,EVM0026134,EVM0025684,EVM0017265,EVM0010074,EVM0015765,EVM0010352,EVM0015521,EVM0021884,EVM0017545,EVM0021089,EVM0011600,EVM0010632,EVM0006386,EVM0021481,EVM0010756,EVM0025950,EVM0026248,EVM0007609,EVM0018743,EVM0014147,EVM0018624,EVM0020263,EVM0015916,EVM0027320,EVM0000387,EVM…	0
red	Biological process	cellular nitrogen compound metabolic process	GO:0034641	4	0	2.52713	81	4092	87	11107	EVM0025699,EVM0025734,EVM0021135,EVM0008792,EVM0012940,EVM0005163,EVM0005681,EVM0006891,EVM0008673,EVM0008277,EVM0007238,EVM0026134,EVM0025684,EVM0017265,EVM0010074,EVM0015765,EVM0010352,EVM0015521,EVM0021884,EVM0017545,EVM0021089,EVM0011600,EVM0010632,EVM0006386,EVM0021481,EVM0010756,EVM0025950,EVM0026248,EVM0007609,EVM0018743,EVM0014147,EVM0018624,EVM0020263,EVM0015916,EVM0027320,EVM0000387,EVM…	0
red	Biological process	cellular macromolecule biosynthetic process	GO:0034645	6	0	4.19513	81	2465	87	11107	EVM0026663,EVM0025699,EVM0025734,EVM0021135,EVM0008792,EVM0012940,EVM0005163,EVM0005681,EVM0006891,EVM0008673,EVM0008277,EVM0007238,EVM0026134,EVM0025684,EVM0017265,EVM0010074,EVM0015765,EVM0010352,EVM0015521,EVM0021884,EVM0017545,EVM0021089,EVM0011600,EVM0010632,EVM0006386,EVM0021481,EVM0010756,EVM0025950,EVM0026248,EVM0007609,EVM0018743,EVM0014147,EVM0018624,EVM0020263,EVM0015916,EVM0027320,EVM…	0
red	Biological process	regulation of macromolecule metabolic process	GO:0060255	5	0	4.48633	81	2305	87	11107	EVM0025699,EVM0025734,EVM0021135,EVM0008792,EVM0012940,EVM0005163,EVM0005681,EVM0006891,EVM0008673,EVM0008277,EVM0007238,EVM0026134,EVM0025684,EVM0017265,EVM0010074,EVM0015765,EVM0010352,EVM0015521,EVM0021884,EVM0017545,EVM0021089,EVM0011600,EVM0010632,EVM0006386,EVM0021481,EVM0010756,EVM0025950,EVM0026248,EVM0007609,EVM0018743,EVM0014147,EVM0018624,EVM0020263,EVM0015916,EVM0027320,EVM0000387,EVM…	0
red	Biological process	biosynthetic process	GO:0009058	3	0	2.77831	82	3768	87	11107	EVM0026663,EVM0025699,EVM0025734,EVM0021135,EVM0008792,EVM0012940,EVM0005163,EVM0005681,EVM0006891,EVM0008673,EVM0008277,EVM0007238,EVM0026134,EVM0025684,EVM0017265,EVM0010074,EVM0015765,EVM0010352,EVM0015521,EVM0021884,EVM0017545,EVM0021089,EVM0011600,EVM0010632,EVM0006386,EVM0021481,EVM0010756,EVM0025950,EVM0026248,EVM0007609,EVM0018743,EVM0014147,EVM0018624,EVM0020263,EVM0015916,EVM0027320,EVM…	0
red	Biological process	specification of floral organ identity	GO:0010093	6	0	57.6559	14	31	87	11107	EVM0025699,EVM0025684,EVM0021884,EVM0010756,EVM0014937,EVM0024791,EVM0004603,EVM0005348,EVM0011078,EVM0027373,EVM0005116,EVM0003978,EVM0020576,EVM0015423,	0
red	Biological process	regulation of nucleic acid-templated transcription	GO:1903506	9	0	6.39518	81	1617	87	11107	EVM0025699,EVM0025734,EVM0021135,EVM0008792,EVM0012940,EVM0005163,EVM0005681,EVM0006891,EVM0008673,EVM0008277,EVM0007238,EVM0026134,EVM0025684,EVM0017265,EVM0010074,EVM0015765,EVM0010352,EVM0015521,EVM0021884,EVM0017545,EVM0021089,EVM0011600,EVM0010632,EVM0006386,EVM0021481,EVM0010756,EVM0025950,EVM0026248,EVM0007609,EVM0018743,EVM0014147,EVM0018624,EVM0020263,EVM0015916,EVM0027320,EVM0000387,EVM…	0
red	Biological process	regulation of nitrogen compound metabolic process	GO:0051171	5	0	4.79416	81	2157	87	11107	EVM0025699,EVM0025734,EVM0021135,EVM0008792,EVM0012940,EVM0005163,EVM0005681,EVM0006891,EVM0008673,EVM0008277,EVM0007238,EVM0026134,EVM0025684,EVM0017265,EVM0010074,EVM0015765,EVM0010352,EVM0015521,EVM0021884,EVM0017545,EVM0021089,EVM0011600,EVM0010632,EVM0006386,EVM0021481,EVM0010756,EVM0025950,EVM0026248,EVM0007609,EVM0018743,EVM0014147,EVM0018624,EVM0020263,EVM0015916,EVM0027320,EVM0000387,EVM…	0
red	Biological process	aromatic compound biosynthetic process	GO:0019438	5	0	4.61034	81	2243	87	11107	EVM0025699,EVM0025734,EVM0021135,EVM0008792,EVM0012940,EVM0005163,EVM0005681,EVM0006891,EVM0008673,EVM0008277,EVM0007238,EVM0026134,EVM0025684,EVM0017265,EVM0010074,EVM0015765,EVM0010352,EVM0015521,EVM0021884,EVM0017545,EVM0021089,EVM0011600,EVM0010632,EVM0006386,EVM0021481,EVM0010756,EVM0025950,EVM0026248,EVM0007609,EVM0018743,EVM0014147,EVM0018624,EVM0020263,EVM0015916,EVM0027320,EVM0000387,EVM…	0
red	Biological process	nucleobase-containing compound metabolic process	GO:0006139	5	0	2.92119	81	3540	87	11107	EVM0025699,EVM0025734,EVM0021135,EVM0008792,EVM0012940,EVM0005163,EVM0005681,EVM0006891,EVM0008673,EVM0008277,EVM0007238,EVM0026134,EVM0025684,EVM0017265,EVM0010074,EVM0015765,EVM0010352,EVM0015521,EVM0021884,EVM0017545,EVM0021089,EVM0011600,EVM0010632,EVM0006386,EVM0021481,EVM0010756,EVM0025950,EVM0026248,EVM0007609,EVM0018743,EVM0014147,EVM0018624,EVM0020263,EVM0015916,EVM0027320,EVM0000387,EVM…	0
red	Biological process	RNA biosynthetic process	GO:0032774	8	1.11e-16	6.058	81	1707	87	11107	EVM0025699,EVM0025734,EVM0021135,EVM0008792,EVM0012940,EVM0005163,EVM0005681,EVM0006891,EVM0008673,EVM0008277,EVM0007238,EVM0026134,EVM0025684,EVM0017265,EVM0010074,EVM0015765,EVM0010352,EVM0015521,EVM0021884,EVM0017545,EVM0021089,EVM0011600,EVM0010632,EVM0006386,EVM0021481,EVM0010756,EVM0025950,EVM0026248,EVM0007609,EVM0018743,EVM0014147,EVM0018624,EVM0020263,EVM0015916,EVM0027320,EVM0000387,EVM…	1.91e-15
red	Biological process	organic substance biosynthetic process	GO:1901576	4	1.11e-16	2.87364	82	3643	87	11107	EVM0026663,EVM0025699,EVM0025734,EVM0021135,EVM0008792,EVM0012940,EVM0005163,EVM0005681,EVM0006891,EVM0008673,EVM0008277,EVM0007238,EVM0026134,EVM0025684,EVM0017265,EVM0010074,EVM0015765,EVM0010352,EVM0015521,EVM0021884,EVM0017545,EVM0021089,EVM0011600,EVM0010632,EVM0006386,EVM0021481,EVM0010756,EVM0025950,EVM0026248,EVM0007609,EVM0018743,EVM0014147,EVM0018624,EVM0020263,EVM0015916,EVM0027320,EVM…	1.91e-15
red	Biological process	biological regulation	GO:0065007	2	1.11e-16	2.1779	84	4924	87	11107	EVM0026663,EVM0025699,EVM0025734,EVM0021135,EVM0008792,EVM0012940,EVM0005163,EVM0005681,EVM0006891,EVM0008673,EVM0008277,EVM0007238,EVM0026134,EVM0025684,EVM0017265,EVM0010074,EVM0015765,EVM0010352,EVM0015521,EVM0021884,EVM0017545,EVM0021089,EVM0011600,EVM0010632,EVM0006386,EVM0021481,EVM0010756,EVM0025950,EVM0026248,EVM0007609,EVM0018743,EVM0014147,EVM0018624,EVM0020263,EVM0015916,EVM0027320,EVM…	1.91e-15
red	Biological process	organic cyclic compound metabolic process	GO:1901360	4	1.11e-16	2.57239	81	4020	87	11107	EVM0025699,EVM0025734,EVM0021135,EVM0008792,EVM0012940,EVM0005163,EVM0005681,EVM0006891,EVM0008673,EVM0008277,EVM0007238,EVM0026134,EVM0025684,EVM0017265,EVM0010074,EVM0015765,EVM0010352,EVM0015521,EVM0021884,EVM0017545,EVM0021089,EVM0011600,EVM0010632,EVM0006386,EVM0021481,EVM0010756,EVM0025950,EVM0026248,EVM0007609,EVM0018743,EVM0014147,EVM0018624,EVM0020263,EVM0015916,EVM0027320,EVM0000387,EVM…	1.91e-15
red	Biological process	nucleic acid-templated transcription	GO:0097659	9	2.22e-16	6.10809	81	1693	87	11107	EVM0025699,EVM0025734,EVM0021135,EVM0008792,EVM0012940,EVM0005163,EVM0005681,EVM0006891,EVM0008673,EVM0008277,EVM0007238,EVM0026134,EVM0025684,EVM0017265,EVM0010074,EVM0015765,EVM0010352,EVM0015521,EVM0021884,EVM0017545,EVM0021089,EVM0011600,EVM0010632,EVM0006386,EVM0021481,EVM0010756,EVM0025950,EVM0026248,EVM0007609,EVM0018743,EVM0014147,EVM0018624,EVM0020263,EVM0015916,EVM0027320,EVM0000387,EVM…	3.5e-15
red	Biological process	nucleobase-containing compound biosynthetic process	GO:0034654	6	2.22e-16	5.27333	81	1961	87	11107	EVM0025699,EVM0025734,EVM0021135,EVM0008792,EVM0012940,EVM0005163,EVM0005681,EVM0006891,EVM0008673,EVM0008277,EVM0007238,EVM0026134,EVM0025684,EVM0017265,EVM0010074,EVM0015765,EVM0010352,EVM0015521,EVM0021884,EVM0017545,EVM0021089,EVM0011600,EVM0010632,EVM0006386,EVM0021481,EVM0010756,EVM0025950,EVM0026248,EVM0007609,EVM0018743,EVM0014147,EVM0018624,EVM0020263,EVM0015916,EVM0027320,EVM0000387,EVM…	3.5e-15
red	Biological process	regulation of primary metabolic process	GO:0080090	5	3.33e-16	4.69619	81	2202	87	11107	EVM0025699,EVM0025734,EVM0021135,EVM0008792,EVM0012940,EVM0005163,EVM0005681,EVM0006891,EVM0008673,EVM0008277,EVM0007238,EVM0026134,EVM0025684,EVM0017265,EVM0010074,EVM0015765,EVM0010352,EVM0015521,EVM0021884,EVM0017545,EVM0021089,EVM0011600,EVM0010632,EVM0006386,EVM0021481,EVM0010756,EVM0025950,EVM0026248,EVM0007609,EVM0018743,EVM0014147,EVM0018624,EVM0020263,EVM0015916,EVM0027320,EVM0000387,EVM…	5.03e-15
red	Biological process	macromolecule biosynthetic process	GO:0009059	5	3.33e-16	4.09893	82	2554	87	11107	EVM0026663,EVM0025699,EVM0025734,EVM0021135,EVM0008792,EVM0012940,EVM0005163,EVM0005681,EVM0006891,EVM0008673,EVM0008277,EVM0007238,EVM0026134,EVM0025684,EVM0017265,EVM0010074,EVM0015765,EVM0010352,EVM0015521,EVM0021884,EVM0017545,EVM0021089,EVM0011600,EVM0010632,EVM0006386,EVM0021481,EVM0010756,EVM0025950,EVM0026248,EVM0007609,EVM0018743,EVM0014147,EVM0018624,EVM0020263,EVM0015916,EVM0027320,EVM…	5.03e-15
red	Biological process	phyllome development	GO:0048827	5	2e-15	6.44299	27	535	87	11107	EVM0025734,EVM0008277,EVM0025684,EVM0021884,EVM0017545,EVM0021089,EVM0006386,EVM0010756,EVM0014147,EVM0019959,EVM0000387,EVM0021743,EVM0014937,EVM0024791,EVM0016132,EVM0005348,EVM0005465,EVM0001825,EVM0009828,EVM0027373,EVM0005116,EVM0005239,EVM0024779,EVM0020576,EVM0015423,EVM0016758,EVM0011989,	2.9e-14
red	Biological process	reproductive system development	GO:0061458	5	6.22e-15	4.0933	37	1154	87	11107	EVM0026663,EVM0025699,EVM0025734,EVM0006891,EVM0007238,EVM0026134,EVM0025684,EVM0015521,EVM0021884,EVM0017545,EVM0021089,EVM0010756,EVM0018743,EVM0014147,EVM0015916,EVM0019959,EVM0027320,EVM0014937,EVM0008992,EVM0012868,EVM0024791,EVM0008642,EVM0004603,EVM0016132,EVM0005348,EVM0005465,EVM0001825,EVM0009828,EVM0011078,EVM0027373,EVM0005116,EVM0005239,EVM0003978,EVM0016354,EVM0020576,EVM0019346,EVM…	8.85e-14
red	Biological process	reproductive structure development	GO:0048608	4	6.22e-15	4.0933	37	1154	87	11107	EVM0026663,EVM0025699,EVM0025734,EVM0006891,EVM0007238,EVM0026134,EVM0025684,EVM0015521,EVM0021884,EVM0017545,EVM0021089,EVM0010756,EVM0018743,EVM0014147,EVM0015916,EVM0019959,EVM0027320,EVM0014937,EVM0008992,EVM0012868,EVM0024791,EVM0008642,EVM0004603,EVM0016132,EVM0005348,EVM0005465,EVM0001825,EVM0009828,EVM0011078,EVM0027373,EVM0005116,EVM0005239,EVM0003978,EVM0016354,EVM0020576,EVM0019346,EVM…	8.85e-14
red	Biological process	primary metabolic process	GO:0044238	3	1.7e-14	1.59295	83	6652	87	11107	EVM0026663,EVM0025699,EVM0025734,EVM0021135,EVM0008792,EVM0012940,EVM0005163,EVM0005681,EVM0006891,EVM0008673,EVM0008277,EVM0007238,EVM0026134,EVM0025684,EVM0017265,EVM0010074,EVM0015765,EVM0010352,EVM0015521,EVM0021884,EVM0017545,EVM0021089,EVM0011600,EVM0010632,EVM0006386,EVM0021481,EVM0010756,EVM0025950,EVM0026248,EVM0007609,EVM0018743,EVM0014147,EVM0018624,EVM0020263,EVM0015916,EVM0027320,EVM…	2.33e-13
red	Biological process	plant organ development	GO:0099402	4	3.89e-14	4.28074	34	1014	87	11107	EVM0025699,EVM0025734,EVM0006891,EVM0008277,EVM0025684,EVM0021884,EVM0017545,EVM0021089,EVM0006386,EVM0010756,EVM0014147,EVM0015916,EVM0019959,EVM0027320,EVM0000387,EVM0021743,EVM0014937,EVM0024791,EVM0004603,EVM0016132,EVM0005348,EVM0005465,EVM0001825,EVM0009828,EVM0011078,EVM0027373,EVM0005116,EVM0005239,EVM0003978,EVM0024779,EVM0020576,EVM0015423,EVM0016758,EVM0011989,	5.23e-13
red	Biological process	floral whorl development	GO:0048438	4	9.26e-14	11.3038	17	192	87	11107	EVM0025734,EVM0025684,EVM0021884,EVM0010756,EVM0014147,EVM0019959,EVM0014937,EVM0024791,EVM0016132,EVM0005348,EVM0005465,EVM0001825,EVM0009828,EVM0027373,EVM0005116,EVM0019346,EVM0015423,	1.22e-12
red	Biological process	system development	GO:0048731	4	1.01e-13	3.04775	45	1885	87	11107	EVM0026663,EVM0025699,EVM0025734,EVM0006891,EVM0008277,EVM0007238,EVM0026134,EVM0025684,EVM0015521,EVM0021884,EVM0017545,EVM0021089,EVM0006386,EVM0010756,EVM0018743,EVM0014147,EVM0015916,EVM0019959,EVM0027320,EVM0000387,EVM0000946,EVM0021743,EVM0014937,EVM0008992,EVM0012868,EVM0024791,EVM0008642,EVM0004603,EVM0016132,EVM0005348,EVM0005465,EVM0001825,EVM0009828,EVM0011078,EVM0027373,EVM0005116,EVM…	1.31e-12
red	Biological process	post-embryonic plant organ morphogenesis	GO:0090697	5	1.47e-13	13.8768	15	138	87	11107	EVM0025699,EVM0025734,EVM0025684,EVM0021884,EVM0010756,EVM0014937,EVM0024791,EVM0004603,EVM0005348,EVM0011078,EVM0027373,EVM0005116,EVM0003978,EVM0020576,EVM0015423,	1.88e-12
red	Biological process	multicellular organism development	GO:0007275	4	6.78e-13	2.61077	50	2445	87	11107	EVM0026663,EVM0025699,EVM0025734,EVM0021135,EVM0006891,EVM0008277,EVM0007238,EVM0026134,EVM0025684,EVM0015521,EVM0021884,EVM0017545,EVM0021089,EVM0010632,EVM0006386,EVM0010756,EVM0007609,EVM0018743,EVM0014147,EVM0015916,EVM0019959,EVM0027320,EVM0000387,EVM0000946,EVM0013563,EVM0021743,EVM0014937,EVM0008992,EVM0012868,EVM0024791,EVM0008642,EVM0004603,EVM0016132,EVM0005348,EVM0005465,EVM0001825,EVM…	8.51e-12
red	Biological process	developmental process involved in reproduction	GO:0003006	3	1.38e-12	3.45803	37	1366	87	11107	EVM0026663,EVM0025699,EVM0025734,EVM0006891,EVM0007238,EVM0026134,EVM0025684,EVM0015521,EVM0021884,EVM0017545,EVM0021089,EVM0010756,EVM0018743,EVM0014147,EVM0015916,EVM0019959,EVM0027320,EVM0014937,EVM0008992,EVM0012868,EVM0024791,EVM0008642,EVM0004603,EVM0016132,EVM0005348,EVM0005465,EVM0001825,EVM0009828,EVM0011078,EVM0027373,EVM0005116,EVM0005239,EVM0003978,EVM0016354,EVM0020576,EVM0019346,EVM…	1.7e-11
red	Biological process	post-embryonic plant morphogenesis	GO:0090698	4	1.45e-12	9.56094	17	227	87	11107	EVM0025699,EVM0025734,EVM0025684,EVM0021884,EVM0021089,EVM0010756,EVM0014937,EVM0024791,EVM0004603,EVM0005348,EVM0001825,EVM0011078,EVM0027373,EVM0005116,EVM0003978,EVM0020576,EVM0015423,	1.76e-11
red	Biological process	cellular metabolic process	GO:0044237	3	1.94e-12	1.49835	83	7072	87	11107	EVM0026663,EVM0025699,EVM0025734,EVM0021135,EVM0008792,EVM0012940,EVM0005163,EVM0005681,EVM0006891,EVM0008673,EVM0008277,EVM0007238,EVM0026134,EVM0025684,EVM0017265,EVM0010074,EVM0015765,EVM0010352,EVM0015521,EVM0021884,EVM0017545,EVM0021089,EVM0011600,EVM0010632,EVM0006386,EVM0021481,EVM0010756,EVM0025950,EVM0026248,EVM0007609,EVM0018743,EVM0014147,EVM0018624,EVM0020263,EVM0015916,EVM0027320,EVM…	2.32e-11
red	Biological process	organic substance metabolic process	GO:0071704	3	1.96e-12	1.49814	83	7073	87	11107	EVM0026663,EVM0025699,EVM0025734,EVM0021135,EVM0008792,EVM0012940,EVM0005163,EVM0005681,EVM0006891,EVM0008673,EVM0008277,EVM0007238,EVM0026134,EVM0025684,EVM0017265,EVM0010074,EVM0015765,EVM0010352,EVM0015521,EVM0021884,EVM0017545,EVM0021089,EVM0011600,EVM0010632,EVM0006386,EVM0021481,EVM0010756,EVM0025950,EVM0026248,EVM0007609,EVM0018743,EVM0014147,EVM0018624,EVM0020263,EVM0015916,EVM0027320,EVM…	2.31e-11
red	Biological process	post-embryonic development	GO:0009791	3	2.13e-12	3.23102	39	1541	87	11107	EVM0026663,EVM0025699,EVM0025734,EVM0006891,EVM0007238,EVM0026134,EVM0025684,EVM0015521,EVM0021884,EVM0017545,EVM0021089,EVM0010632,EVM0010756,EVM0007609,EVM0018743,EVM0014147,EVM0015916,EVM0019959,EVM0027320,EVM0014937,EVM0008992,EVM0012868,EVM0024791,EVM0008642,EVM0004603,EVM0016132,EVM0005348,EVM0005465,EVM0001825,EVM0009828,EVM0011078,EVM0027373,EVM0005116,EVM0005239,EVM0003978,EVM0016354,EVM…	2.46e-11
red	Biological process	plant organ formation	GO:1905393	4	2.96e-12	11.3314	15	169	87	11107	EVM0025699,EVM0025734,EVM0025684,EVM0021884,EVM0010756,EVM0014937,EVM0024791,EVM0004603,EVM0005348,EVM0011078,EVM0027373,EVM0005116,EVM0003978,EVM0020576,EVM0015423,	3.37e-11
red	Biological process	regionalization	GO:0003002	4	3.22e-12	11.2647	15	170	87	11107	EVM0025699,EVM0025684,EVM0021884,EVM0010756,EVM0014937,EVM0024791,EVM0004603,EVM0005348,EVM0011078,EVM0027373,EVM0005116,EVM0005239,EVM0003978,EVM0020576,EVM0015423,	3.61e-11
red	Biological process	plant organ morphogenesis	GO:1905392	4	5.2e-12	6.44471	21	416	87	11107	EVM0025699,EVM0025734,EVM0025684,EVM0021884,EVM0021089,EVM0010756,EVM0014147,EVM0027320,EVM0000387,EVM0021743,EVM0014937,EVM0024791,EVM0004603,EVM0005348,EVM0011078,EVM0027373,EVM0005116,EVM0003978,EVM0024779,EVM0020576,EVM0015423,	5.75e-11
red	Biological process	carpel development	GO:0048440	6	5.28e-12	20.0619	11	70	87	11107	EVM0025734,EVM0025684,EVM0021884,EVM0019959,EVM0014937,EVM0024791,EVM0005348,EVM0001825,EVM0027373,EVM0005116,EVM0015423,	5.75e-11
red	Biological process	post-embryonic plant organ development	GO:0090696	5	9.67e-12	9.37003	16	218	87	11107	EVM0025699,EVM0025734,EVM0006891,EVM0025684,EVM0021884,EVM0010756,EVM0014937,EVM0024791,EVM0004603,EVM0005348,EVM0011078,EVM0027373,EVM0005116,EVM0003978,EVM0020576,EVM0015423,	1.04e-10
red	Biological process	gynoecium development	GO:0048467	5	2.08e-11	17.7764	11	79	87	11107	EVM0025734,EVM0025684,EVM0021884,EVM0019959,EVM0014937,EVM0024791,EVM0005348,EVM0001825,EVM0027373,EVM0005116,EVM0015423,	2.2e-10
red	Biological process	multicellular organismal process	GO:0032501	2	3.84e-11	2.35808	50	2707	87	11107	EVM0026663,EVM0025699,EVM0025734,EVM0021135,EVM0006891,EVM0008277,EVM0007238,EVM0026134,EVM0025684,EVM0015521,EVM0021884,EVM0017545,EVM0021089,EVM0010632,EVM0006386,EVM0010756,EVM0007609,EVM0018743,EVM0014147,EVM0015916,EVM0019959,EVM0027320,EVM0000387,EVM0000946,EVM0013563,EVM0021743,EVM0014937,EVM0008992,EVM0012868,EVM0024791,EVM0008642,EVM0004603,EVM0016132,EVM0005348,EVM0005465,EVM0001825,EVM…	4e-10
red	Biological process	developmental process	GO:0032502	2	5.04e-11	2.2265	53	3039	87	11107	EVM0026663,EVM0025699,EVM0025734,EVM0021135,EVM0006891,EVM0008277,EVM0007238,EVM0026134,EVM0025684,EVM0015765,EVM0015521,EVM0021884,EVM0017545,EVM0021089,EVM0010632,EVM0006386,EVM0010756,EVM0007609,EVM0018743,EVM0014147,EVM0015916,EVM0019959,EVM0027320,EVM0000387,EVM0024699,EVM0000946,EVM0013563,EVM0021743,EVM0014937,EVM0009201,EVM0008992,EVM0012868,EVM0024791,EVM0008642,EVM0004603,EVM0016132,EVM…	5.19e-10
red	Biological process	reproductive process	GO:0022414	2	6.39e-11	3.04556	37	1551	87	11107	EVM0026663,EVM0025699,EVM0025734,EVM0006891,EVM0007238,EVM0026134,EVM0025684,EVM0015521,EVM0021884,EVM0017545,EVM0021089,EVM0010756,EVM0018743,EVM0014147,EVM0015916,EVM0019959,EVM0027320,EVM0014937,EVM0008992,EVM0012868,EVM0024791,EVM0008642,EVM0004603,EVM0016132,EVM0005348,EVM0005465,EVM0001825,EVM0009828,EVM0011078,EVM0027373,EVM0005116,EVM0005239,EVM0003978,EVM0016354,EVM0020576,EVM0019346,EVM…	6.47e-10
red	Biological process	pattern specification process	GO:0007389	3	7.26e-11	9.07583	15	211	87	11107	EVM0025699,EVM0025684,EVM0021884,EVM0010756,EVM0014937,EVM0024791,EVM0004603,EVM0005348,EVM0011078,EVM0027373,EVM0005116,EVM0005239,EVM0003978,EVM0020576,EVM0015423,	7.26e-10
red	Biological process	reproduction	GO:0000003	2	7.58e-11	3.02799	37	1560	87	11107	EVM0026663,EVM0025699,EVM0025734,EVM0006891,EVM0007238,EVM0026134,EVM0025684,EVM0015521,EVM0021884,EVM0017545,EVM0021089,EVM0010756,EVM0018743,EVM0014147,EVM0015916,EVM0019959,EVM0027320,EVM0014937,EVM0008992,EVM0012868,EVM0024791,EVM0008642,EVM0004603,EVM0016132,EVM0005348,EVM0005465,EVM0001825,EVM0009828,EVM0011078,EVM0027373,EVM0005116,EVM0005239,EVM0003978,EVM0016354,EVM0020576,EVM0019346,EVM…	7.48e-10
red	Biological process	anatomical structure development	GO:0048856	3	8.45e-11	2.27181	51	2866	87	11107	EVM0026663,EVM0025699,EVM0025734,EVM0021135,EVM0006891,EVM0008277,EVM0007238,EVM0026134,EVM0025684,EVM0015765,EVM0015521,EVM0021884,EVM0017545,EVM0021089,EVM0010632,EVM0006386,EVM0010756,EVM0007609,EVM0018743,EVM0014147,EVM0015916,EVM0019959,EVM0027320,EVM0000387,EVM0000946,EVM0013563,EVM0021743,EVM0014937,EVM0008992,EVM0012868,EVM0024791,EVM0008642,EVM0004603,EVM0016132,EVM0005348,EVM0005465,EVM…	8.23e-10
red	Biological process	plant-type ovary development	GO:0035670	5	1.69e-10	22.5294	9	51	87	11107	EVM0025684,EVM0021884,EVM0019959,EVM0014937,EVM0024791,EVM0005348,EVM0001825,EVM0027373,EVM0005116,	1.63e-09
red	Biological process	meristem maintenance	GO:0010073	3	3.62e-10	10.182	13	163	87	11107	EVM0007238,EVM0025684,EVM0021884,EVM0019959,EVM0027320,EVM0000387,EVM0014937,EVM0024791,EVM0005348,EVM0005116,EVM0003978,EVM0024779,EVM0016354,	3.44e-09
red	Biological process	floral meristem determinacy	GO:0010582	4	6.07e-10	35.7467	7	25	87	11107	EVM0025684,EVM0021884,EVM0019959,EVM0014937,EVM0005348,EVM0005116,EVM0003978,	5.69e-09
red	Biological process	stamen development	GO:0048443	6	9.82e-10	12.5387	11	112	87	11107	EVM0021884,EVM0010756,EVM0014147,EVM0014937,EVM0016132,EVM0005348,EVM0005465,EVM0001825,EVM0009828,EVM0005116,EVM0015423,	9.08e-09
red	Biological process	androecium development	GO:0048466	5	9.82e-10	12.5387	11	112	87	11107	EVM0021884,EVM0010756,EVM0014147,EVM0014937,EVM0016132,EVM0005348,EVM0005465,EVM0001825,EVM0009828,EVM0005116,EVM0015423,	9.08e-09
red	Biological process	meristem determinacy	GO:0010022	3	1.11e-09	33.0988	7	27	87	11107	EVM0025684,EVM0021884,EVM0019959,EVM0014937,EVM0005348,EVM0005116,EVM0003978,	9.99e-09
red	Biological process	meristem development	GO:0048507	5	1.66e-09	6.63203	16	308	87	11107	EVM0006891,EVM0007238,EVM0025684,EVM0021884,EVM0018743,EVM0019959,EVM0027320,EVM0000387,EVM0014937,EVM0024791,EVM0005348,EVM0005116,EVM0003978,EVM0024779,EVM0016354,EVM0020576,	1.48e-08
red	Biological process	metabolic process	GO:0008152	2	1.68e-09	1.37045	83	7732	87	11107	EVM0026663,EVM0025699,EVM0025734,EVM0021135,EVM0008792,EVM0012940,EVM0005163,EVM0005681,EVM0006891,EVM0008673,EVM0008277,EVM0007238,EVM0026134,EVM0025684,EVM0017265,EVM0010074,EVM0015765,EVM0010352,EVM0015521,EVM0021884,EVM0017545,EVM0021089,EVM0011600,EVM0010632,EVM0006386,EVM0021481,EVM0010756,EVM0025950,EVM0026248,EVM0007609,EVM0018743,EVM0014147,EVM0018624,EVM0020263,EVM0015916,EVM0027320,EVM…	1.48e-08
red	Biological process	plant ovule development	GO:0048481	5	2.99e-09	21.2778	8	48	87	11107	EVM0025684,EVM0021884,EVM0014937,EVM0024791,EVM0005348,EVM0001825,EVM0027373,EVM0005116,	2.6e-08
red	Biological process	stamen formation	GO:0048455	6	1.31e-08	34.8182	6	22	87	11107	EVM0021884,EVM0010756,EVM0014937,EVM0005348,EVM0005116,EVM0015423,	1.13e-07
red	Biological process	anatomical structure formation involved in morphogenesis	GO:0048646	3	1.92e-08	6.06013	15	316	87	11107	EVM0025699,EVM0025734,EVM0025684,EVM0021884,EVM0010756,EVM0014937,EVM0024791,EVM0004603,EVM0005348,EVM0011078,EVM0027373,EVM0005116,EVM0003978,EVM0020576,EVM0015423,	1.64e-07
red	Biological process	stamen morphogenesis	GO:0048448	7	2.33e-08	31.9167	6	24	87	11107	EVM0021884,EVM0010756,EVM0014937,EVM0005348,EVM0005116,EVM0015423,	1.96e-07
red	Biological process	regulation of flower development	GO:0009909	7	4.01e-08	8.83229	11	159	87	11107	EVM0007238,EVM0026134,EVM0015521,EVM0021884,EVM0008992,EVM0012868,EVM0008642,EVM0005116,EVM0016354,EVM0020576,EVM0019346,	3.34e-07
red	Biological process	tissue development	GO:0009888	4	1.67e-07	3.62788	21	739	87	11107	EVM0006891,EVM0007238,EVM0025684,EVM0015765,EVM0021884,EVM0018743,EVM0015916,EVM0019959,EVM0027320,EVM0000387,EVM0000946,EVM0014937,EVM0024791,EVM0005348,EVM0001825,EVM0005116,EVM0005239,EVM0003978,EVM0024779,EVM0016354,EVM0020576,	1.37e-06
red	Biological process	positive regulation of DNA-templated transcription	GO:0045893	11	1.77e-07	4.76146	16	429	87	11107	EVM0021135,EVM0005681,EVM0008673,EVM0007238,EVM0017265,EVM0015765,EVM0021884,EVM0010632,EVM0007609,EVM0018743,EVM0021743,EVM0009201,EVM0019487,EVM0015283,EVM0005116,EVM0011989,	1.44e-06
red	Biological process	positive regulation of macromolecule biosynthetic process	GO:0010557	7	3.43e-07	4.25556	17	510	87	11107	EVM0021135,EVM0005681,EVM0008673,EVM0007238,EVM0017265,EVM0015765,EVM0021884,EVM0010632,EVM0007609,EVM0018743,EVM0021743,EVM0001721,EVM0009201,EVM0019487,EVM0015283,EVM0005116,EVM0011989,	2.73e-06
red	Biological process	positive regulation of RNA biosynthetic process	GO:1902680	9	3.48e-07	4.52919	16	451	87	11107	EVM0021135,EVM0005681,EVM0008673,EVM0007238,EVM0017265,EVM0015765,EVM0021884,EVM0010632,EVM0007609,EVM0018743,EVM0021743,EVM0009201,EVM0019487,EVM0015283,EVM0005116,EVM0011989,	2.74e-06
red	Biological process	positive regulation of nucleic acid-templated transcription	GO:1903508	10	3.48e-07	4.52919	16	451	87	11107	EVM0021135,EVM0005681,EVM0008673,EVM0007238,EVM0017265,EVM0015765,EVM0021884,EVM0010632,EVM0007609,EVM0018743,EVM0021743,EVM0009201,EVM0019487,EVM0015283,EVM0005116,EVM0011989,	2.74e-06
red	Biological process	positive regulation of RNA metabolic process	GO:0051254	8	4.39e-07	4.18176	17	519	87	11107	EVM0021135,EVM0005681,EVM0008673,EVM0007238,EVM0017265,EVM0015765,EVM0021884,EVM0010632,EVM0007609,EVM0018743,EVM0021743,EVM0009201,EVM0019487,EVM0015283,EVM0005116,EVM0016758,EVM0011989,	3.35e-06
red	Biological process	positive regulation of flower development	GO:0009911	8	6.01e-07	19.15	6	40	87	11107	EVM0007238,EVM0026134,EVM0021884,EVM0008642,EVM0005116,EVM0016354,	4.54e-06
red	Biological process	positive regulation of gene expression	GO:0010628	7	6.21e-07	4.07957	17	532	87	11107	EVM0021135,EVM0005681,EVM0008673,EVM0007238,EVM0017265,EVM0015765,EVM0021884,EVM0010632,EVM0007609,EVM0018743,EVM0021743,EVM0009201,EVM0019487,EVM0015283,EVM0005116,EVM0005239,EVM0011989,	4.64e-06
red	Biological process	anatomical structure morphogenesis	GO:0009653	3	6.9e-07	2.98054	24	1028	87	11107	EVM0025699,EVM0025734,EVM0006891,EVM0025684,EVM0021884,EVM0021089,EVM0010756,EVM0014147,EVM0015916,EVM0027320,EVM0000387,EVM0021743,EVM0014937,EVM0024791,EVM0004603,EVM0005348,EVM0001825,EVM0011078,EVM0027373,EVM0005116,EVM0003978,EVM0024779,EVM0020576,EVM0015423,	5.11e-06
red	Biological process	regulation of shoot system development	GO:0048831	5	6.93e-07	5.96109	12	257	87	11107	EVM0007238,EVM0026134,EVM0015521,EVM0021884,EVM0008992,EVM0012868,EVM0008642,EVM0005116,EVM0005239,EVM0016354,EVM0020576,EVM0019346,	5.08e-06
red	Biological process	positive regulation of biosynthetic process	GO:0009891	6	1.06e-06	3.92465	17	553	87	11107	EVM0021135,EVM0005681,EVM0008673,EVM0007238,EVM0017265,EVM0015765,EVM0021884,EVM0010632,EVM0007609,EVM0018743,EVM0021743,EVM0001721,EVM0009201,EVM0019487,EVM0015283,EVM0005116,EVM0011989,	7.71e-06
red	Biological process	positive regulation of nucleobase-containing compound metabolic process	GO:0045935	7	1.2e-06	3.88949	17	558	87	11107	EVM0021135,EVM0005681,EVM0008673,EVM0007238,EVM0017265,EVM0015765,EVM0021884,EVM0010632,EVM0007609,EVM0018743,EVM0021743,EVM0009201,EVM0019487,EVM0015283,EVM0005116,EVM0016758,EVM0011989,	8.65e-06
red	Biological process	jasmonic acid mediated signaling pathway	GO:0009867	7	1.9e-06	9.45679	8	108	87	11107	EVM0006386,EVM0021481,EVM0014147,EVM0005030,EVM0014460,EVM0009828,EVM0005239,EVM0016758,	1.35e-05
red	Biological process	cellular response to jasmonic acid stimulus	GO:0071395	8	2.51e-06	9.11905	8	112	87	11107	EVM0006386,EVM0021481,EVM0014147,EVM0005030,EVM0014460,EVM0009828,EVM0005239,EVM0016758,	1.77e-05
red	Biological process	cellular response to fatty acid	GO:0071398	7	2.68e-06	9.03835	8	113	87	11107	EVM0006386,EVM0021481,EVM0014147,EVM0005030,EVM0014460,EVM0009828,EVM0005239,EVM0016758,	1.87e-05
red	Biological process	positive regulation of cellular biosynthetic process	GO:0031328	7	2.86e-06	3.86137	16	529	87	11107	EVM0021135,EVM0005681,EVM0008673,EVM0007238,EVM0017265,EVM0015765,EVM0021884,EVM0010632,EVM0007609,EVM0018743,EVM0021743,EVM0009201,EVM0019487,EVM0015283,EVM0005116,EVM0011989,	1.98e-05
red	Biological process	regulation of reproductive process	GO:2000241	4	5.79e-06	4.86349	12	315	87	11107	EVM0007238,EVM0026134,EVM0015521,EVM0021884,EVM0008992,EVM0012868,EVM0008642,EVM0005116,EVM0005239,EVM0016354,EVM0020576,EVM0019346,	3.93e-05
red	Biological process	response to jasmonic acid	GO:0009753	7	6.02e-06	5.99374	10	213	87	11107	EVM0005681,EVM0006386,EVM0021481,EVM0014147,EVM0005030,EVM0001825,EVM0014460,EVM0009828,EVM0005239,EVM0016758,	4.05e-05
red	Biological process	response to fatty acid	GO:0070542	6	6.27e-06	5.96573	10	214	87	11107	EVM0005681,EVM0006386,EVM0021481,EVM0014147,EVM0005030,EVM0001825,EVM0014460,EVM0009828,EVM0005239,EVM0016758,	4.18e-05
red	Biological process	positive regulation of macromolecule metabolic process	GO:0010604	6	6.53e-06	3.12989	19	775	87	11107	EVM0021135,EVM0005681,EVM0008673,EVM0007238,EVM0017265,EVM0015765,EVM0021884,EVM0010632,EVM0007609,EVM0018743,EVM0021743,EVM0001721,EVM0009201,EVM0019487,EVM0015283,EVM0005116,EVM0005239,EVM0016758,EVM0011989,	4.32e-05
red	Biological process	positive regulation of reproductive process	GO:2000243	5	7.63e-06	12.5574	6	61	87	11107	EVM0007238,EVM0026134,EVM0021884,EVM0008642,EVM0005116,EVM0016354,	5e-05
red	Biological process	regulation of developmental process	GO:0050793	4	8.77e-06	3.06658	19	791	87	11107	EVM0007238,EVM0026134,EVM0025684,EVM0015521,EVM0021884,EVM0018743,EVM0015916,EVM0027320,EVM0008992,EVM0012868,EVM0008642,EVM0001825,EVM0027373,EVM0005116,EVM0005239,EVM0003978,EVM0016354,EVM0020576,EVM0019346,	5.69e-05
red	Biological process	anatomical structure arrangement	GO:0048532	3	2e-05	10.6389	6	72	87	11107	EVM0006891,EVM0021884,EVM0000387,EVM0005116,EVM0024779,EVM0020576,	0.000128955
red	Biological process	positive regulation of metabolic process	GO:0009893	5	2.63e-05	2.83704	19	855	87	11107	EVM0021135,EVM0005681,EVM0008673,EVM0007238,EVM0017265,EVM0015765,EVM0021884,EVM0010632,EVM0007609,EVM0018743,EVM0021743,EVM0001721,EVM0009201,EVM0019487,EVM0015283,EVM0005116,EVM0005239,EVM0016758,EVM0011989,	0.000163762
red	Biological process	leaf development	GO:0048366	6	3.07e-05	4.11828	12	372	87	11107	EVM0008277,EVM0017545,EVM0021089,EVM0006386,EVM0000387,EVM0021743,EVM0005239,EVM0024779,EVM0020576,EVM0015423,EVM0016758,EVM0011989,	0.00018924
red	Biological process	positive regulation of nitrogen compound metabolic process	GO:0051173	6	3.36e-05	3.02696	17	717	87	11107	EVM0021135,EVM0005681,EVM0008673,EVM0007238,EVM0017265,EVM0015765,EVM0021884,EVM0010632,EVM0007609,EVM0018743,EVM0021743,EVM0009201,EVM0019487,EVM0015283,EVM0005116,EVM0016758,EVM0011989,	0.000205495
red	Biological process	regulation of post-embryonic development	GO:0048580	6	4.87e-05	3.92821	12	390	87	11107	EVM0007238,EVM0026134,EVM0015521,EVM0021884,EVM0008992,EVM0012868,EVM0008642,EVM0005116,EVM0005239,EVM0016354,EVM0020576,EVM0019346,	0.000292783
red	Biological process	positive regulation of cellular metabolic process	GO:0031325	6	6.44e-05	2.87461	17	755	87	11107	EVM0021135,EVM0005681,EVM0008673,EVM0007238,EVM0017265,EVM0015765,EVM0021884,EVM0010632,EVM0007609,EVM0018743,EVM0021743,EVM0009201,EVM0019487,EVM0015283,EVM0005116,EVM0016758,EVM0011989,	0.000375069
red	Biological process	positive regulation of post-embryonic development	GO:0048582	7	7.59e-05	8.41758	6	91	87	11107	EVM0007238,EVM0026134,EVM0021884,EVM0008642,EVM0005116,EVM0016354,	0.000438977
red	Biological process	regulation of meristem development	GO:0048509	5	0.000104889	6.42926	7	139	87	11107	EVM0025684,EVM0021884,EVM0018743,EVM0027320,EVM0005116,EVM0003978,EVM0020576,	0.00060169
red	Biological process	regulation of multicellular organismal development	GO:2000026	5	0.00017186	3.04486	14	587	87	11107	EVM0007238,EVM0026134,EVM0015521,EVM0021884,EVM0027320,EVM0008992,EVM0012868,EVM0008642,EVM0001825,EVM0005116,EVM0005239,EVM0016354,EVM0020576,EVM0019346,	0.000970813
red	Biological process	hormone-mediated signaling pathway	GO:0009755	6	0.000190581	2.86677	15	668	87	11107	EVM0025699,EVM0006891,EVM0010074,EVM0006386,EVM0021481,EVM0025950,EVM0026248,EVM0018743,EVM0014147,EVM0005030,EVM0010797,EVM0014460,EVM0009828,EVM0005239,EVM0016758,	0.00106037
red	Biological process	cell fate commitment	GO:0045165	4	0.000259536	8.74429	5	73	87	11107	EVM0024699,EVM0027373,EVM0005239,EVM0020576,EVM0015423,	0.00141218
red	Biological process	positive regulation of biological process	GO:0048518	4	0.000262735	2.14175	23	1371	87	11107	EVM0026663,EVM0021135,EVM0005681,EVM0008673,EVM0007238,EVM0026134,EVM0017265,EVM0015765,EVM0021884,EVM0010632,EVM0007609,EVM0018743,EVM0021743,EVM0001721,EVM0009201,EVM0008642,EVM0019487,EVM0015283,EVM0005116,EVM0005239,EVM0016354,EVM0016758,EVM0011989,	0.00141915
red	Biological process	shoot system morphogenesis	GO:0010016	4	0.000289896	4.70661	8	217	87	11107	EVM0006891,EVM0021884,EVM0021089,EVM0000387,EVM0021743,EVM0005116,EVM0024779,EVM0015423,	0.00155451
red	Biological process	cellular response to hormone stimulus	GO:0032870	6	0.000318635	2.6188	16	780	87	11107	EVM0025699,EVM0006891,EVM0010074,EVM0011600,EVM0006386,EVM0021481,EVM0025950,EVM0026248,EVM0018743,EVM0014147,EVM0005030,EVM0010797,EVM0014460,EVM0009828,EVM0005239,EVM0016758,	0.00169633
red	Biological process	aging	GO:0007568	3	0.000650502	5.67407	6	135	87	11107	EVM0008277,EVM0017545,EVM0006386,EVM0008642,EVM0016758,EVM0011989,	0.00336624
red	Biological process	cellular response to endogenous stimulus	GO:0071495	4	0.00065911	2.45218	16	833	87	11107	EVM0025699,EVM0006891,EVM0010074,EVM0011600,EVM0006386,EVM0021481,EVM0025950,EVM0026248,EVM0018743,EVM0014147,EVM0005030,EVM0010797,EVM0014460,EVM0009828,EVM0005239,EVM0016758,	0.00338709
red	Biological process	regulation of multicellular organismal process	GO:0051239	4	0.000668979	2.66369	14	671	87	11107	EVM0007238,EVM0026134,EVM0015521,EVM0021884,EVM0027320,EVM0008992,EVM0012868,EVM0008642,EVM0001825,EVM0005116,EVM0005239,EVM0016354,EVM0020576,EVM0019346,	0.0034141
red	Biological process	cellular response to oxygen-containing compound	GO:1901701	5	0.000917731	2.57912	14	693	87	11107	EVM0010074,EVM0011600,EVM0006386,EVM0021481,EVM0025950,EVM0026248,EVM0018743,EVM0014147,EVM0005030,EVM0010797,EVM0014460,EVM0009828,EVM0005239,EVM0016758,	0.00461987
red	Biological process	cellular response to lipid	GO:0071396	6	0.00115481	2.95649	11	475	87	11107	EVM0006386,EVM0021481,EVM0025950,EVM0026248,EVM0018743,EVM0014147,EVM0005030,EVM0014460,EVM0009828,EVM0005239,EVM0016758,	0.00577403
red	Biological process	fruit development	GO:0010154	5	0.00119012	2.63022	13	631	87	11107	EVM0026663,EVM0006891,EVM0021884,EVM0017545,EVM0021089,EVM0024791,EVM0008642,EVM0016132,EVM0001825,EVM0005116,EVM0005239,EVM0016354,EVM0020576,	0.00591069
red	Biological process	positive regulation of cellular process	GO:0048522	5	0.00153406	2.12778	18	1080	87	11107	EVM0026663,EVM0021135,EVM0005681,EVM0008673,EVM0007238,EVM0017265,EVM0015765,EVM0021884,EVM0010632,EVM0007609,EVM0018743,EVM0021743,EVM0009201,EVM0019487,EVM0015283,EVM0005116,EVM0016758,EVM0011989,	0.0075179
red	Biological process	leaf morphogenesis	GO:0009965	5	0.00168663	5.80303	5	110	87	11107	EVM0021089,EVM0000387,EVM0021743,EVM0024779,EVM0015423,	0.00821125
red	Biological process	positive regulation of multicellular organismal process	GO:0051240	5	0.00189449	4.61446	6	166	87	11107	EVM0007238,EVM0026134,EVM0021884,EVM0008642,EVM0005116,EVM0016354,	0.00916288
red	Biological process	response to oxygen-containing compound	GO:1901700	4	0.00210333	1.84675	23	1590	87	11107	EVM0005681,EVM0008277,EVM0007238,EVM0010074,EVM0021089,EVM0011600,EVM0006386,EVM0021481,EVM0025950,EVM0026248,EVM0018743,EVM0014147,EVM0005030,EVM0001721,EVM0022420,EVM0019487,EVM0010797,EVM0001825,EVM0014460,EVM0009828,EVM0005239,EVM0016758,EVM0011989,	0.0101069
red	Biological process	positive regulation of developmental process	GO:0051094	5	0.00226595	4.45349	6	172	87	11107	EVM0007238,EVM0026134,EVM0021884,EVM0008642,EVM0005116,EVM0016354,	0.0108181
red	Biological process	cellular response to organic substance	GO:0071310	5	0.00379125	2.07167	16	986	87	11107	EVM0025699,EVM0006891,EVM0010074,EVM0011600,EVM0006386,EVM0021481,EVM0025950,EVM0026248,EVM0018743,EVM0014147,EVM0005030,EVM0010797,EVM0014460,EVM0009828,EVM0005239,EVM0016758,	0.0176448
red	Biological process	response to lipid	GO:0033993	5	0.00406626	2.12306	15	902	87	11107	EVM0005681,EVM0007238,EVM0021089,EVM0006386,EVM0021481,EVM0025950,EVM0026248,EVM0018743,EVM0014147,EVM0005030,EVM0001825,EVM0014460,EVM0009828,EVM0005239,EVM0016758,	0.0186896
red	Biological process	response to gibberellin	GO:0009739	6	0.00464414	4.59233	5	139	87	11107	EVM0007238,EVM0021089,EVM0014147,EVM0009828,EVM0005239,	0.0210838
red	Biological process	response to ethylene	GO:0009723	6	0.00465391	3.84925	6	199	87	11107	EVM0005681,EVM0010074,EVM0011600,EVM0010797,EVM0014460,EVM0005239,	0.0209993
red	Biological process	rhythmic process	GO:0048511	2	0.00478697	4.55952	5	140	87	11107	EVM0008673,EVM0017265,EVM0010632,EVM0007609,EVM0013563,	0.0214689
red	Biological process	circadian rhythm	GO:0007623	3	0.00478697	4.55952	5	140	87	11107	EVM0008673,EVM0017265,EVM0010632,EVM0007609,EVM0013563,	0.0214689
red	Biological process	leaf senescence	GO:0010150	4	0.00493291	4.52719	5	141	87	11107	EVM0008277,EVM0017545,EVM0006386,EVM0016758,EVM0011989,	0.0218584
red	Biological process	plant organ senescence	GO:0090693	3	0.0053897	4.43287	5	144	87	11107	EVM0008277,EVM0017545,EVM0006386,EVM0016758,EVM0011989,	0.0235999
red	Biological process	response to hormone	GO:0009725	5	0.00606154	1.76034	21	1523	87	11107	EVM0025699,EVM0005163,EVM0005681,EVM0006891,EVM0007238,EVM0010074,EVM0021089,EVM0011600,EVM0006386,EVM0021481,EVM0025950,EVM0026248,EVM0018743,EVM0014147,EVM0005030,EVM0010797,EVM0001825,EVM0014460,EVM0009828,EVM0005239,EVM0016758,	0.0262312
red	Biological process	vegetative to reproductive phase transition of meristem	GO:0010228	4	0.00616699	3.63033	6	211	87	11107	EVM0015521,EVM0021884,EVM0018743,EVM0027320,EVM0008992,EVM0005116,	0.0265324
red	Biological process	response to light stimulus	GO:0009416	5	0.00625658	2.17234	13	764	87	11107	EVM0008673,EVM0026134,EVM0017265,EVM0015521,EVM0010632,EVM0007609,EVM0018743,EVM0013563,EVM0021743,EVM0008992,EVM0012868,EVM0005239,EVM0011989,	0.0267623
red	Biological process	cellular process	GO:0009987	2	0.00658621	1.09272	84	9814	87	11107	EVM0026663,EVM0025699,EVM0025734,EVM0021135,EVM0008792,EVM0012940,EVM0005163,EVM0005681,EVM0006891,EVM0008673,EVM0008277,EVM0007238,EVM0026134,EVM0025684,EVM0017265,EVM0010074,EVM0015765,EVM0010352,EVM0015521,EVM0021884,EVM0017545,EVM0021089,EVM0011600,EVM0010632,EVM0006386,EVM0021481,EVM0010756,EVM0025950,EVM0026248,EVM0007609,EVM0018743,EVM0014147,EVM0018624,EVM0020263,EVM0015916,EVM0027320,EVM…	0.0280103
red	Biological process	negative regulation of macromolecule biosynthetic process	GO:0010558	7	0.00769033	2.79817	8	365	87	11107	EVM0014147,EVM0000387,EVM0015348,EVM0021743,EVM0005030,EVM0024779,EVM0019346,EVM0016758,	0.0321517
red	Biological process	negative regulation of developmental process	GO:0051093	5	0.00792301	4.04008	5	158	87	11107	EVM0015521,EVM0015916,EVM0008992,EVM0005239,EVM0019346,	0.0325724
red	Biological process	response to endogenous stimulus	GO:0009719	3	0.00856139	1.70764	21	1570	87	11107	EVM0025699,EVM0005163,EVM0005681,EVM0006891,EVM0007238,EVM0010074,EVM0021089,EVM0011600,EVM0006386,EVM0021481,EVM0025950,EVM0026248,EVM0018743,EVM0014147,EVM0005030,EVM0010797,EVM0001825,EVM0014460,EVM0009828,EVM0005239,EVM0016758,	0.0346198
red	Biological process	cellular response to acid chemical	GO:0071229	5	0.00925947	2.70911	8	377	87	11107	EVM0006386,EVM0021481,EVM0018743,EVM0014147,EVM0014460,EVM0009828,EVM0005239,EVM0016758,	0.0370379
red	Biological process	negative regulation of cellular process	GO:0048523	5	0.00927717	1.99925	14	894	87	11107	EVM0025950,EVM0026248,EVM0018743,EVM0014147,EVM0015916,EVM0000387,EVM0015348,EVM0021743,EVM0005030,EVM0005239,EVM0024779,EVM0019346,EVM0015423,EVM0016758,	0.0369092
red	Biological process	negative regulation of cellular biosynthetic process	GO:0031327	7	0.00983246	2.68066	8	381	87	11107	EVM0014147,EVM0000387,EVM0015348,EVM0021743,EVM0005030,EVM0024779,EVM0019346,EVM0016758,	0.0387022
red	Biological process	response to radiation	GO:0009314	4	0.0108393	2.02893	13	818	87	11107	EVM0008673,EVM0026134,EVM0017265,EVM0015521,EVM0010632,EVM0007609,EVM0018743,EVM0013563,EVM0021743,EVM0008992,EVM0012868,EVM0005239,EVM0011989,	0.0422162
red	Biological process	negative regulation of biosynthetic process	GO:0009890	6	0.0108985	2.6323	8	388	87	11107	EVM0014147,EVM0000387,EVM0015348,EVM0021743,EVM0005030,EVM0024779,EVM0019346,EVM0016758,	0.0422245
[truncated: 279 more rows]
